# Supplementary material
Source: HighWire-hosted journal article supplement (doi:10.1101/rna.079258.122)
Supplement: Supplemental_Table_S1.xlsx [file Supplemental_Table_S1.xlsx]

## Sheet: Legend
Effect of DRBD18 depletion on the transcriptome of bloodstream forms
1. DesSeq2 analysis for all coding regions
2. DesSeq2 analysis for all coding regions with corresponding 3'-UTRs
3. DesSeq2 analysis for all loci with corresponding RPM (reads per million) values calculated after elimination of rRNAs
4. Raw mapped reads minus and plus tetracycline.
KEY
2x significantly (padj <0.05) increased
1.5x significantly (padj <0.05) increased
2x significantly (padj <0.05) decreased
1.5x significantly (padj <0.05) decreased
WC- whole cell
CY - cytoplasm
BS - bloodstream form
PC- procyclic form
CDS - coding sequence
UTR - 3'-UTR

## Sheet: 1. DeSeq2 CDS only
GeneID	GeneID	Gene order	Annotation2	Category	baseMean	Bloodstream WC log2FoldChange	Bloodstream WC padj	Bloodstream WC Increase 2x	Bloodstream WC Decrease 2x	Bloodstream WC Increase 1.5x	Bloodstream WC decrease 1.5x	Procyclic WC log2FoldChange	Procyclic WC BH corrected p-value	PC increase 2x	PC decrease 2x	UNique
Tb927.1.4100	Tb927.1.4100	Tb927.01.4100	cytochrome oxidase subunit IV (COXIV)	Mito.e.transport	2809.9	1.2012	2.78e-69	1	0	1	0	0.326	0.794227	0	0	1
Tb927.3.3960	Tb927.3.3960	Tb927.03.3960	DRBD6A	RNA.binding	1148.8	1.1246	8.76e-40	1	0	1	0	2.1627	3.28142e-12	1	0	1
Tb927.4.1390	Tb927.4.1390	Tb927.04.1390	hypothetical protein, conserved	ZUnknown	3739.1	1.1299	6.57e-75	1	0	1	0	1.0161	1.76693e-07	1	0	1
Tb927.4.2410	Tb927.4.2410	Tb927.04.2410	Glycosyl hydrolase family 65 central catalytic domain/Haloacid dehalogenase-like hydrolase, putative	ZUnknown	2965.7	1.0956	8.63e-50	1	0	1	0	0.6939	0.254272	0	0	1
Tb927.4.4810	Tb927.4.4810	Tb927.04.4810	hypothetical protein, conserved	Vesicular.transport	481.5	1.0069	2.84e-21	1	0	1	0	0.6658	0.0457639	0	0	1
Tb927.4.4940	Tb927.4.4940	Tb927.04.4940	hypothetical protein, conserved, poly(Q), no clear yeast or human matches	ZUnknown	1205.5	1.6967	2.33e-69	1	0	1	0	1.2003	0.000232135	1	0	1
Tb927.4.5060	Tb927.4.5060	Tb927.04.5060	hypothetical protein	ZUnknown	315.6	1.4678	2.46e-30	1	0	1	0	-0.1991	0.966631	0	0	1
Tb927.5.470	Tb927.5.470	Tb927.05.0470	Riboflavin transporter	Transporter	1204.9	1.1883	6.88e-35	1	0	1	0	0.5619	0.747231	0	0	1
Tb927.5.3440	Tb927.5.3440	Tb927.05.3440	hypothetical protein, conserved	ZUnknown	1382	1.9464	4.38e-92	1	0	1	0	1.9129	5.61997e-07	1	0	1
Tb927.5.3720	Tb927.5.3720	Tb927.05.3720	hypothetical protein, conserved	ZUnknown	380.9	1.1262	2.05e-21	1	0	1	0	1.0126	2.43517e-07	1	0	1
Tb927.5.3770	Tb927.5.3770	Tb927.05.3770	hypothetical protein, conserved	ZUnknown	1202.6	1.9523	5.69e-93	1	0	1	0	1.4467	5.854e-07	1	0	0
Tb927.5.4020	Tb927.5.4020	Tb927.05.4020	hypothetical protein no clear yeast or human matches	ZUnknown	398.5	1.073	1.26e-19	1	0	1	0	-1.0393	0.00595742	0	1	1
Tb927.6.220	Tb927.6.220	Tb927.06.0220	purine nucleoside transporter NT9	Nucleotides	678.5	1.2314	3.41e-28	1	0	1	0	0.1218	0.999265	0	0	1
Tb927.6.690	Tb927.6.690	Tb927.06.0690	hypothetical protein, conserved, no clear yeast or human matches	ZUnknown	1418.9	1.2986	3.69e-68	1	0	1	0	1.7265	0.000312087	1	0	1
Tb927.6.5020	Tb927.6.5020	Tb927.06.5020	CYC7, CYC2-like cyclin	Cell.cycle	481.3	1.2318	1.03e-22	1	0	1	0	0.4224	0.870263	0	0	1
Tb927.7.310	Tb927.7.310	Tb927.07.0310	Thioredoxin domain, also matches human prostaglandin E synthetase	Enzyme	944.9	1.6706	1.3e-81	1	0	1	0	2.0229	4.72888e-19	1	0	1
Tb927.7.1090	Tb927.7.1090	Tb927.07.1090	SNF2 family N-terminal domain/Ring finger domain containing protein, putative	ZUnknown	7010.5	1.2003	3.53e-79	1	0	1	0	2.4826	4.19881e-17	1	0	1
Tb927.7.1810	Tb927.7.1810	Tb927.07.1810	hypothetical protein, conserved	ZUnknown	1706.8	1.9117	3.14e-97	1	0	1	0	1.377	6.63079e-07	1	0	1
Tb927.7.1850	Tb927.7.1850	Tb927.07.1850	hypothetical protein, conserved	ZUnknown	1693.5	1.9773	1.1e-137	1	0	1	0	1.377	6.63079e-07	1	0	0
Tb927.7.2980	Tb927.7.2980	Tb927.07.2980	Nitroreductase family, putative	ZUnknown	1648.4	1.7622	2.21e-126	1	0	1	0	-0.3502	0.95615	0	0	1
Tb927.7.3020	Tb927.7.3020	Tb927.07.3020	Nitroreductase family, putative	ZUnknown	1630.5	1.7321	1.65e-125	1	0	1	0	-1.7741	3.54106e-06	0	1	0
Tb927.7.4730	Tb927.7.4730	Tb927.07.4730	PUF5	RNA.binding	962.7	1.0828	5.36e-27	1	0	1	0	1.3781	0.00438656	1	0	1
Tb927.7.5340	Tb927.7.5340	Tb927.07.5340	CARP3	Signalling	5327.2	1.0853	1.26e-76	1	0	1	0	2.0767	4.34252e-05	1	0	1
Tb927.7.5380	Tb927.7.5380	Tb927.07.5380	DRBD12	RNA.binding	2014.8	1.4513	5.73e-92	1	0	1	0	4.6104	1.56021e-62	1	0	1
Tb927.7.6300	Tb927.7.6300	Tb927.07.6300	WD domain, G-beta repeat, putative	ZUnknown	755.5	1.0368	9.43e-29	1	0	1	0	2.6124	2.53301e-28	1	0	1
Tb927.7.6490	Tb927.7.6490	Tb927.07.6490	hypothetical protein, conserved	ZUnknown	1178.7	1.1337	2.59e-44	1	0	1	0	0.4642	0.973555	0	0	1
Tb927.8.970	Tb927.8.970	Tb927.08.0970	hypothetical protein	ZUnknown	2297.3	1.2394	2.19e-45	1	0	1	0	0.6779	0.015378	0	0	1
Tb927.8.1580	Tb927.8.1580	Tb927.08.1580	hypothetical protein, conserved	ZUnknown	1193.9	1.1718	1.19e-33	1	0	1	0	1.3263	3.33888e-26	1	0	1
Tb927.8.3390	Tb927.8.3390	Tb927.08.3390	hypothetical protein, conserved	ZUnknown	1099.5	1.6521	1.97e-76	1	0	1	0	1.3112	0.00129597	1	0	1
Tb927.8.4710	Tb927.8.4710	Tb927.08.4710	AAT5 Arginine transporter	Amino.acid.transport	849.7	1.1259	6.77e-27	1	0	1	0	5.2312	0.594399	0	0	0
Tb927.8.4720	Tb927.8.4720	Tb927.08.4720	AAT5 Arginine transporter	Amino.acid.transport	1100.1	1.1177	7.17e-29	1	0	1	0	0.6345	0.511766	0	0	0
Tb927.8.4730	Tb927.8.4730	Tb927.08.4730	AAT5 Arginine transporter	Amino.acid.transport	856.9	1.1732	3.84e-28	1	0	1	0	-0.0391	0.999265	0	0	0
Tb927.8.4740	Tb927.8.4740	Tb927.08.4740	AAT5 Arginine transporter	Amino.acid.transport	1051.1	1.0525	5.85e-23	1	0	1	0	0.5058	0.00445831	0	0	0
Tb927.8.5930	Tb927.8.5930	Tb927.08.5930	hypothetical protein	ZUnknown	41.5	2.0276	2.66e-08	1	0	1	0	1.2013	1.58774e-07	1	0	1
Tb927.8.6650	Tb927.8.6650	Tb927.08.6650	DRBD13	RNA.binding	1745.1	1.1211	2.19e-44	1	0	1	0	1.9118	0.00017047	1	0	1
Tb927.9.4310	Tb927.9.4310	Tb927.09.04310	tricarboxylate carrier, putative	Mito.membrane	1397.8	1.3688	4.07e-75	1	0	1	0	1.6823	4.75271e-21	1	0	1
Tb927.9.10280	Tb927.9.10280	Tb927.09.10280	ZC3H48	RNA.binding	380.1	1.0487	2.79e-18	1	0	1	0	1.7227	0.00380607	1	0	1
Tb927.9.10950	Tb927.9.10950	Tb927.09.10950	chaperone DNAj, putative, J43	Chaperone	1777.1	1.0116	7.27e-45	1	0	1	0	1.6985	2.31585e-05	1	0	1
Tb927.9.11820	Tb927.9.11820	Tb927.09.11820	CRAL/TRIO domain containing protein, putative	ZUnknown	640.5	1.0237	1.24e-20	1	0	1	0	-0.2436	0.71846	0	0	1
Tb927.9.15610	Tb927.9.15610	Tb927.09.15610	BARP protein	Membrane.protein	334	1.7015	1.33e-38	1	0	1	0	1.558	1.76045e-08	1	0	0
Tb927.10.2560	Tb927.10.2560	Tb927.10.02560	mitochondrial malate dehydrogenase (mMDH)	Mito.citric.acid.cycle	1922.6	1.0691	7.67e-51	1	0	1	0	-0.8179	2.99147e-06	0	0	1
Tb927.10.4620	Tb927.10.4620	Tb927.10.04620	peptidyl-prolyl cis-trans isomerase, putative (PPIase)	Chaperone	494	1.043	1.98e-21	1	0	1	0	0.3894	0.436803	0	0	1
Tb927.10.8050	Tb927.10.8050	Tb927.10.08050	TFIIF-stimulated CTD phosphatase, putative	Protein.phosphatase	880.6	1.3365	2.09e-51	1	0	1	0	1.7701	2.14525e-08	1	0	1
Tb927.10.10210	Tb927.10.10210	Tb927.10.10210	procyclin-associated gene 4 (PAG4) protein (PAG4)	PAG	207.3	1.3888	5.65e-15	1	0	1	0	0.9802	0.102633	0	0	1
Tb927.10.10220	Tb927.10.10220	Tb927.10.10220	procyclin-associated gene 2 (PAG2) protein (PAG2)	PAG	204.4	1.5874	1.8e-19	1	0	1	0	0.4742	0.551555	0	0	1
Tb927.10.10230	Tb927.10.10230	Tb927.10.10230	procyclin-associated gene 5 (PAG5) protein (PAG5)	PAG	147.4	1.4951	9.71e-16	1	0	1	0	-0.3316	0.857908	0	0	1
Tb927.10.10240	Tb927.10.10240	Tb927.10.10240	procyclin-associated gene 1 (PAG1) protein (PAG1)	PAG	166.4	1.1301	2.19e-11	1	0	1	0	-0.0559	0.999265	0	0	0
Tb927.10.12780	Tb927.10.12780	Tb927.10.12780	ZC3H37	RNA.binding	816	1.1443	3.14e-34	1	0	1	0	1.9392	5.50129e-06	1	0	1
Tb927.10.14270	Tb927.10.14270	Tb927.10.14270	TFIIF-stimulated CTD phosphatase, putative	Protein.phosphatase	1536.5	1.2252	1.41e-63	1	0	1	0	2.6539	2.16623e-12	1	0	1
Tb927.11.490	Tb927.11.490	Tb927.11.00490	hypothetical protein, conserved	ZUnknown	819.7	1.9022	4.31e-83	1	0	1	0	1.1606	0.00693343	1	0	1
Tb927.11.1830	Tb927.11.1830	Tb927.11.01830	flagellar membrane protein, conserved, signal peptide and 5 TM domains	Membrane.protein	450.7	1.0103	3.34e-19	1	0	1	0	-0.2615	0.999265	0	0	1
Tb927.11.5350	Tb927.11.5350	Tb927.11.05350	myo-inositol/proton symporter (MIT)	Glucose.glycerol	2232.2	1.2347	3.63e-60	1	0	1	0	0.3796	0.664183	0	0	1
Tb927.11.5670	Tb927.11.5670	Tb927.11.05670	MND1 homologue, putative involvement in meiosis	DNA	729.5	1.6573	8.58e-59	1	0	1	0	-0.1027	0.999265	0	0	1
Tb927.11.5720	Tb927.11.5720	Tb927.11.05720	hypothetical protein, conserved	ZUnknown	1356.3	1.0391	2.76e-30	1	0	1	0	0.3498	0.969066	0	0	1
Tb927.11.7620	Tb927.11.7620	Tb927.11.07620	MSP-A, putative	Membrane.protein	126.9	1.4031	1.25e-12	1	0	1	0	-0.0485	0.999265	0	0	0
Tb927.11.7750	Tb927.11.7750	Tb927.11.07750	MSP-A, putative	Membrane.protein	382.4	1.1745	2.47e-21	1	0	1	0	1.2581	0.0445323	1	0	0
Tb927.11.7760	Tb927.11.7760	Tb927.11.07760	MSP-A, putative	Membrane.protein	251.1	1.399	1.69e-19	1	0	1	0	1.5746	0.0124375	1	0	0
Tb927.11.8330	Tb927.11.8330	Tb927.11.08330	hypothetical protein, conserved, 4 C2H2 Zn fingers	Zinc.finger	3043.3	1.5506	5.67e-110	1	0	1	0	2.28	6.09287e-08	1	0	1
Tb927.11.10060	Tb927.11.10060	Tb927.11.10060	Biotin--acetyl-CoA-carboxylase ligase, putative,biotin--protein ligase, putative	Enzyme	2165.9	1.1325	5.8e-58	1	0	1	0	-0.4345	0.065377	0	0	1
Tb927.11.13940	Tb927.11.13940	Tb927.11.13940	ubiquitin-conjugating enzyme e2, putative	Ubiquitin.proteasome	1558.4	1.5649	1.9e-73	1	0	1	0	1.7641	1.36345e-07	1	0	1
Tb927.11.15010	Tb927.11.15010	Tb927.11.15010	NEK21 protein kinase	Protein.kinase	1636	1.2328	2.37e-57	1	0	1	0	0.8652	0.00424796	0	0	1
Tb927.11.16170	Tb927.11.16170	Tb927.11.16170	hypothetical protein, conserved, signal peptide	ZUnknown	398.9	1.2132	2.32e-23	1	0	1	0	0.7044	0.00485356	0	0	1
Tb927.11.16480	Tb927.11.16480	Tb927.11.16480	enoyl-CoA hydratase/isomerase family protein, putative	Lipids	1153.7	1.3464	5.19e-56	1	0	1	0	-0.1822	0.993058	0	0	1
Tb927.1.4810	Tb927.1.4810	Tb927.01.4810	hypothetical protein, conserved (pseudogene)	Pseudogene	491.3	1.0308	1.91e-19	1	0	1	0	0.0721	0.999265	0	0	0
Tb927.5.285b	Tb927.5.285b	Tb927.05.0285b	ESAG4, putative	GRESAG	1504.9	1.2747	2.05e-60	1	0	1	0	0.4023	0.71846	0	0	0
Tb927.5.320	Tb927.5.320	Tb927.05.0320	GRESAG 4, putative receptor-type adenylate cyclase	GRESAG	1319.5	1.2476	2.01e-45	1	0	1	0	0.3938	0.397196	0	0	0
Tb927.5.4535	Tb927.5.4535	Tb927.05.4535	hypothetical protein	ZUnknown	64.8	1.4398	1.92e-05	1	0	1	0	0.5419	0.33254	0	0	0
Tb927.7.6500	Tb927.7.6500	Tb927.07.6500	variant surface glycoprotein (VSG), putative	VSG	37	1.2675	0.000461	1	0	1	0	1.4016	0.000107343	1	0	0
Tb927.8.4300	Tb927.8.4300	Tb927.08.4300	hypothetical protein	ZUnknown	979.6	1.8732	5.96e-75	1	0	1	0	2.2791	2.21224e-06	1	0	1
Tb927.8.4750	Tb927.8.4750	Tb927.08.4750	amino acid transporter, AAT5, Arg, His, Lys	Amino.acids	154.6	1.0905	9.61e-09	1	0	1	0	0.3443	0.3043	0	0	0
Tb927.9.2815	Tb927.9.2815	Tb927.09.02815	Domain of unknown function (DUF5075), putative	ZUnknown	146.5	1.0258	2.53e-08	1	0	1	0	0.5932	0.818589	0	0	0
Tb927.10.2430	Tb927.10.2430	Tb927.10.02430	GRESAG 4, putative receptor-type adenylate cyclase	GRESAG	2485.7	1.3604	1.37e-88	1	0	1	0	1.1376	0.000300749	1	0	1
Tb927.11.7610	Tb927.11.7610	Tb927.11.07610	gp63-1 surface protease pseudogene	pseudogene	453.4	1.7233	1.34e-51	1	0	1	0	1.4389	0.00833913	1	0	0
Tb927.11.7630.1-p1-CDS1	Tb927.11.7630	Tb927.11.07630	Gp63-1 surface protease homolog, putative	Membrane.protein	481.7	2.4499	1.16e-88	1	0	1	0	0.3653	0.338617	0	0	0
Tb927.11.7640.1-p1-CDS1	Tb927.11.7640	Tb927.11.07640	Gp63-1 surface protease homolog, putative	Membrane.protein	289.8	1.0184	6.56e-14	1	0	1	0	0.1089	0.999265	0	0	0
Tb927.11.7695	Tb927.11.7695	Tb927.11.07695	hypothetical protein, conserved	ZUnknown	925.2	1.0303	9.86e-31	1	0	1	0	0.1171	0.999265	0	0	0
Tb927.11.7710.1-p1-CDS1	Tb927.11.7710	Tb927.11.07710	Gp63-1 surface protease homolog, putative	Membrane.protein	2281.4	1.2174	8.26e-64	1	0	1	0	1.4379	1.40549e-05	1	0	0
Tb927.11.7720.1-p1-CDS1	Tb927.11.7720	Tb927.11.07720	Gp63-1 surface protease homolog, putative	Membrane.protein	272.9	1.4845	4.17e-26	1	0	1	0	1.5022	0.00347716	1	0	0
Tb927.11.12710	Tb927.11.12710	Tb927.11.12710	variant surface glycoprotein (VSG)-related, putative	VSG	237.8	1.1021	7.66e-12	1	0	1	0	0.6447	0.0371376	0	0	0
Tb11.0310	Tb11.0310	#N/A	hypothetical protein	ZUnknown	531.2	1.0106	3.41e-17	1	0	1	0			0	0	0
Tb11.0360	Tb11.0360	#N/A	MSP-A, putative	Membrane.protein	702.9	1.0697	2.06e-25	1	0	1	0			0	0	0
Tb11.0370	Tb11.0370	#N/A	MSP-A, putative	Membrane.protein	612	1.4768	4.96e-50	1	0	1	0			0	0	0
Tb11.0380	Tb11.0380	#N/A	MSP-A, putative	Membrane.protein	1913	1.3086	2.06e-73	1	0	1	0			0	0	0
Tb11.0410	Tb11.0410	#N/A	hypothetical protein	ZUnknown	532.3	1.0065	6.12e-19	1	0	1	0			0	0	0
Tb11.1390.1-p1-CDS1	Tb11.1390	#N/A	hypothetical protein	ZUnknown	619.5	1.0548	3.82e-26	1	0	1	0			0	0	0
Tb11.1800	Tb11.1800	#N/A	retrotransposon hot spot protein (RHS, pseudogene), putative	RHS	626.6	1.0091	3.74e-19	1	0	1	0			0	0	0
Tb11.NT.1	Tb11.NT.1	#N/A	Noncoding RNA, putative	ncRNA	347.1	1.2429	3.63e-23	1	0	1	0			0	0	0
Tb11.NT.96	Tb11.NT.96	#N/A	Noncoding RNA, putative	ncRNA	329.7	1.313	5.39e-21	1	0	1	0			0	0	0
Tb11.v5.0156.1-p1-CDS1	Tb11.v5.0156	#N/A	hypothetical protein, conserved	ZUnknown	916	1.0914	1.36e-27	1	0	1	0			0	0	0
Tb11.v5.0209.1-p1-CDS1	Tb11.v5.0209	#N/A	Adenylate and Guanylate cyclase catalytic domain containing protein, putative	ZUnknown	1339.8	1.2917	6.87e-57	1	0	1	0			0	0	0
Tb11.v5.0217.1-p1-CDS1	Tb11.v5.0217	#N/A	receptor-type adenylate cyclase GRESAG 4, putative	ESAG	660.1	1.3553	1.37e-42	1	0	1	0			0	0	0
Tb11.v5.0221.1-p1-CDS1	Tb11.v5.0221	#N/A	transporter, putative	Transporter	1343.9	1.2305	5.56e-32	1	0	1	0			0	0	0
Tb11.v5.0281.1-p1-CDS1	Tb11.v5.0281	#N/A	receptor-type adenylate cyclase GRESAG 4, putative	ESAG	1366.2	1.0672	1.54e-40	1	0	1	0			0	0	0
Tb11.v5.0470.1-p1-CDS1	Tb11.v5.0470	#N/A	receptor-type adenylate cyclase GRESAG 4, putative	ESAG	1192.4	1.3807	9.39e-67	1	0	1	0			0	0	0
Tb11.v5.0510.1-p1-CDS1	Tb11.v5.0510	#N/A	Gp63-3 surface protease homolog, putative	Membrane.protein	157.7	2.0072	2.35e-27	1	0	1	0			0	0	0
Tb11.v5.0511.1-p1-CDS1	Tb11.v5.0511	#N/A	Gp63-3 surface protease homolog, putative	Membrane.protein	87.3	1.6865	3.27e-12	1	0	1	0			0	0	0
Tb11.v5.0513.1-p1-CDS1	Tb11.v5.0513	#N/A	NLI interacting factor-like phosphatase, putative	ZUnknown	922.2	1.2939	1.24e-52	1	0	1	0			0	0	0
Tb11.v5.0569.1-p1-CDS1	Tb11.v5.0569	#N/A	amino acid transporter, putative	Transporter	2113	1.1291	2.4e-34	1	0	1	0			0	0	0
Tb11.v5.0710.1-p1-CDS1	Tb11.v5.0710	#N/A	Gp63-1 surface protease homolog, putative	Membrane.protein	398.3	1.2251	1.06e-26	1	0	1	0			0	0	0
Tb2.NT.57	Tb2.NT.57	#N/A	Noncoding RNA, putative	ncRNA	161	1.0863	2.26e-08	1	0	1	0			0	0	0
Tb2.NT.63	Tb2.NT.63	#N/A	Noncoding RNA, putative	ncRNA	194.3	1.1676	1.46e-10	1	0	1	0			0	0	0
Tb927.1.2110	Tb927.1.2110	Tb927.01.2110	calpain-like cysteine peptidase, putative,cysteine peptidase, Clan CA, family C2, putative	Protease	1200.7	0.6347	4.73e-12	0	0	1	0	0.6326	0.00380411	0	0	1
Tb927.1.2820	Tb927.1.2820	Tb927.01.2820	pteridine transporter, putative	Transporter	2308.7	0.9523	1.41e-31	0	0	1	0	-0.2117	0.999265	0	0	1
Tb927.1.2850	Tb927.1.2850	Tb927.01.2850	pteridine transporter, putative	Transporter	1579.6	0.9608	1.34e-25	0	0	1	0	0.2447	0.999265	0	0	0
Tb927.1.2880	Tb927.1.2880	Tb927.01.2880	pteridine transporter, putative	Transporter	2205.3	0.9465	1.21e-26	0	0	1	0	-0.118	0.999265	0	0	0
Tb927.1.3550	Tb927.1.3550	Tb927.01.3550	hypothetical protein	ZUnknown	1313.6	0.8451	1.14e-25	0	0	1	0	1.6144	4.57899e-09	1	0	1
Tb927.2.1820	Tb927.2.1820	Tb927.02.1820	protein kinase, putative	Protein.kinase	2769.3	0.7102	3.73e-27	0	0	1	0	2.1354	1.34267e-08	1	0	1
Tb927.2.3720	Tb927.2.3720	Tb927.02.3720	ubiquitin-conjugating enzyme, putative	Ubiquitin.proteasome	1064.3	0.7604	6.09e-16	0	0	1	0	1.8453	0.00078701	1	0	1
Tb927.2.4200	Tb927.2.4200	Tb927.02.4200	protein kinase, putative	Protein.kinase	2481.9	0.6505	2.43e-21	0	0	1	0	2.8455	1.19667e-19	1	0	1
Tb927.2.5980	Tb927.2.5980	Tb927.02.5980	ATP-dependent Clp protease subunit, heat shock protein 104 (HSP104)	Chaperone	2677.4	0.7347	2.71e-26	0	0	1	0	0.2697	0.905641	0	0	1
Tb927.3.590	Tb927.3.590	Tb927.03.0590	adenosine transporter AT-E or NT12.1	Nucleotides	163.2	0.5884	0.000937	0	0	1	0	-0.3096	0.983586	0	0	1
Tb927.3.630	Tb927.3.630	Tb927.03.0630	hypothetical protein, conserved	ZUnknown	346.7	0.6345	4.87e-07	0	0	1	0	0.252	0.999265	0	0	1
Tb927.3.1410	Tb927.3.1410	Tb927.03.1410	cytochrome oxidase subunit VII (COXVII)	Mito.e.transport	1346.8	0.5947	3.11e-13	0	0	1	0	-0.0363	0.999265	0	0	1
Tb927.3.1720	Tb927.3.1720	Tb927.03.1720	hypothetical protein, conserved	Mito.pathway	424.4	0.5901	1.69e-05	0	0	1	0	1.1752	0.170695	0	0	1
Tb927.3.2140	Tb927.3.2140	Tb927.03.2140	Transcription activator SNF2PH	RNA.synthesis	5757.4	0.6478	7.79e-28	0	0	1	0	0.1834	0.996189	0	0	1
Tb927.3.2460	Tb927.3.2460	Tb927.03.2460	hypothetical protein, conserved	ZUnknown	731.6	0.6003	2.54e-10	0	0	1	0	0.217	0.874051	0	0	1
Tb927.3.3060	Tb927.3.3060	Tb927.03.3060	hypothetical protein, conserved, kinetoplastid-specific	ZUnknown	3164.8	0.9235	1.43e-31	0	0	1	0	2.9674	1.26547e-09	1	0	1
Tb927.3.3340	Tb927.3.3340	Tb927.03.3340	3', 5'-cyclic nucleotide phosphodiesterase, putative (PDED)	Lipids	1374.2	0.5963	3.28e-14	0	0	1	0	0.0511	0.999265	0	0	1
Tb927.3.3930	Tb927.3.3930	Tb927.03.3930	DRBD6B	RNA.binding	1248.7	0.7964	3.11e-19	0	0	1	0	1.2845	0.0349305	1	0	0
Tb927.3.5190	Tb927.3.5190	Tb927.03.5190	hypothetical protein, conserved	ZUnknown	942.2	0.6038	3.46e-12	0	0	1	0	0.0314	0.999265	0	0	1
Tb927.4.2500	Tb927.4.2500	Tb927.04.2500	eIF2K2 eukaryotic translation initiation factor 2-alpha kinase	Protein.kinase	5116.3	0.6291	7.57e-26	0	0	1	0	1.6762	1.03638e-12	1	0	1
Tb927.4.3170	Tb927.4.3170	Tb927.04.3170	hypothetical protein, conserved	ZUnknown	2851.6	0.6864	7.01e-24	0	0	1	0	1.0192	2.91456e-06	1	0	1
Tb927.4.3320	Tb927.4.3320	Tb927.04.3320	uracil phosphoribosyltransferase, putative	Nucleotides	1553.1	0.6964	5.77e-15	0	0	1	0	0.7368	0.154956	0	0	1
Tb927.4.3340	Tb927.4.3340	Tb927.04.3340	hypothetical protein, conserved, in MCM-BP-TAP	ZUnknown	566.1	0.8663	2.14e-18	0	0	1	0	0.7616	4.79406e-05	0	0	1
Tb927.4.4220	Tb927.4.4220	Tb927.04.4220	small GTP-binding rab protein, putative (TbRX2)	Vesicular.transport	1547.1	0.6209	6.85e-16	0	0	1	0	1.6676	8.69177e-08	1	0	1
Tb927.4.4620	Tb927.4.4620	Tb927.04.4620	cytochrome oxidase subunit VIII (COXVIII)	Mito.e.transport	355.9	0.6828	3.18e-08	0	0	1	0	-0.1539	0.999265	0	0	1
Tb927.4.4630	Tb927.4.4630	Tb927.04.4630	hypothetical protein, conserved	ZUnknown	194.1	0.7023	4.49e-05	0	0	1	0	-0.0166	0.999265	0	0	1
Tb927.5.440	Tb927.5.440	Tb927.05.0440	trans-sialidase, putative	Membrane.protein	633.5	0.6161	1.89e-10	0	0	1	0	-0.5117	0.981802	0	0	1
Tb927.5.1050	Tb927.5.1050	Tb927.05.1050	hypothetical protein	ZUnknown	489.7	0.9335	1.26e-13	0	0	1	0	0.0124	0.999265	0	0	1
Tb927.5.1070	Tb927.5.1070	Tb927.05.1070	hypothetical protein, conserved	Cytoskeleton	2421	0.6451	4.08e-19	0	0	1	0	1.1627	0.000289283	1	0	1
Tb927.5.2360	Tb927.5.2360	Tb927.05.2360	hypothetical protein, conserved	ZUnknown	1007.1	0.8348	3.07e-25	0	0	1	0	1.2964	0.00442656	1	0	1
Tb927.5.2620	Tb927.5.2620	Tb927.05.2620	hypothetical protein, conserved, ubiquitin-like C-terminus, no yeast or human match	ZUnknown	2826.3	0.657	1.07e-21	0	0	1	0	1.5479	0.00546247	1	0	1
Tb927.5.3040	Tb927.5.3040	Tb927.05.3040	Cytochrome c Oxidase complex, MIX protein	Mito.e.transport	363.2	0.5856	1.79e-06	0	0	1	0	-0.0685	0.999265	0	0	1
Tb927.5.3130	Tb927.5.3130	Tb927.05.3130	hypothetical protein	ZUnknown	679.9	0.8307	4.36e-19	0	0	1	0	0.2518	0.999265	0	0	1
Tb927.5.3350	Tb927.5.3350	Tb927.05.3350	iron superoxide dismutase, putative	Mito.pathway	1755.9	0.7651	1.14e-22	0	0	1	0	0.2179	0.999265	0	0	1
Tb927.5.3760	Tb927.5.3760	Tb927.05.3760	SPO11 meiotic recombination protein	DNA	784.8	0.8544	2.99e-20	0	0	1	0	1.3528	0.0560468	0	0	1
Tb927.5.3890	Tb927.5.3890	Tb927.05.3890	hypothetical protein, conserved	ZUnknown	516.9	0.6526	9.01e-10	0	0	1	0	-0.1618	0.886867	0	0	1
Tb927.5.4330	Tb927.5.4330	Tb927.05.4330	dihydrolipoamide branched chain transacylase, putative	Mito.pathway	1315.7	0.5967	1.16e-13	0	0	1	0	-0.0584	0.999265	0	0	1
Tb927.5.4350	Tb927.5.4350	Tb927.05.4350	NUDIX hydrolase, putative	Enzyme	1029.3	0.9005	3.79e-24	0	0	1	0	1.3565	0.00120458	1	0	1
Tb927.5.4380	Tb927.5.4380	Tb927.05.4380	KPP1 kinetoplastid-specific phospho-protein phosphatase	Protein.phosphatase	3661.9	0.687	2.45e-23	0	0	1	0	0.6992	0.440496	0	0	1
Tb927.6.820	Tb927.6.820	Tb927.06.0820	PUF4	RNA.binding	3360	0.5998	1.13e-18	0	0	1	0	4.0487	4.13998e-51	1	0	1
Tb927.6.1230	Tb927.6.1230	Tb927.06.1230	kinetoplastid-specific phospho-protein phosphatase	Protein.phosphatase	1068.3	0.7347	1.28e-15	0	0	1	0	0.3747	0.0534317	0	0	1
Tb927.6.5050	Tb927.6.5050	Tb927.06.5050	V-type ATPase, C subunit, putative	Lysosome	2006.4	0.6252	5.66e-18	0	0	1	0	0.097	0.999265	0	0	1
Tb927.6.5090	Tb927.6.5090	Tb927.06.5090	hypothetical protein, conserved	ZUnknown	2667.8	0.6885	2.28e-19	0	0	1	0	0.4941	0.229828	0	0	1
Tb927.7.200	Tb927.7.200	Tb927.07.0200	hypothetical protein, conserved	ZUnknown	967.5	0.6974	2.58e-16	0	0	1	0	0.3531	0.0636167	0	0	1
Tb927.7.360	Tb927.7.360	Tb927.07.0360	MISPA	Membrane.protein	413.7	0.637	5.54e-08	0	0	1	0	0.3244	0.989812	0	0	0
Tb927.7.380	Tb927.7.380	Tb927.07.0380	MISPA	Membrane.protein	356.6	0.6624	2.72e-07	0	0	1	0	0.3555	0.989812	0	0	0
Tb927.7.440	Tb927.7.440	Tb927.07.0440	MISPA	Membrane.protein	350.9	0.7642	2.52e-10	0	0	1	0	0.1978	0.999265	0	0	0
Tb927.7.2420	Tb927.7.2420	Tb927.07.2420	GSK3-long glycogen synthase kinase-3 alpha	Glycans	2025.2	0.7144	4.27e-25	0	0	1	0	2.1604	2.34723e-13	1	0	1
Tb927.7.3520	Tb927.7.3520	Tb927.07.3520	MPC2 mitochondrial pyruvate carrier	Mito.membrane	883.7	0.6072	2.52e-10	0	0	1	0	0.0898	0.999265	0	0	1
Tb927.7.4180	Tb927.7.4180	Tb927.07.4180	Elongase 3	Lipids	5447	0.8676	8.26e-35	0	0	1	0	0.3262	0.736717	0	0	1
Tb927.7.4970	Tb927.7.4970	Tb927.07.4970	glutamine synthetase, putative	Amino.acids	487.7	0.814	3.3e-14	0	0	1	0	-0.2532	0.557881	0	0	1
Tb927.7.5550.1	Tb927.7.5550	Tb927.07.5550	hypothetical protein, conserved, TLD domain	Enzyme	779.4	0.6756	3.9e-10	0	0	1	0	0.0665	0.999265	0	0	1
Tb927.7.6270	Tb927.7.6270	Tb927.07.6270	peptidase t, putative	Protease	1172.2	0.7252	1.25e-18	0	0	1	0	0.206	0.879444	0	0	1
Tb927.7.6340	Tb927.7.6340	Tb927.07.6340	hypothetical protein, conserved, no clear yeast or human matches	ZUnknown	2084.8	0.6485	1.66e-19	0	0	1	0	1.4303	3.26421e-05	1	0	1
Tb927.7.6420	Tb927.7.6420	Tb927.07.6420	hypothetical protein, conserved	ZUnknown	2210.9	0.798	6.04e-26	0	0	1	0	0.175	0.8839	0	0	1
Tb927.7.6570	Tb927.7.6570	Tb927.07.6570	ESP17 Enriched in surface-labeled proteome	Membrane.protein	691.8	0.6327	1.87e-08	0	0	1	0	-1.3512	2.9103e-07	0	1	1
Tb927.7.6600	Tb927.7.6600	Tb927.07.6600	hypothetical protein, conserved	Membrane.protein	1304.8	0.8112	1.42e-17	0	0	1	0	0.0544	0.999265	0	0	1
Tb927.7.6800	Tb927.7.6800	Tb927.07.6800	LSU ribosomal protein, mitochondrial, putative	Mito.translation	722.3	0.6449	9.23e-11	0	0	1	0	-0.1571	0.999265	0	0	1
Tb927.7.6830	Tb927.7.6830	Tb927.07.6830	trans-sialidase, putative	Membrane.protein	756.3	0.8331	7.9e-19	0	0	1	0	-0.7576	0.140608	0	0	0
Tb927.7.6850	Tb927.7.6850	Tb927.07.6850	trans-sialidase (TbTS)	Membrane.protein	1733.8	0.8613	1.83e-30	0	0	1	0	-1.0748	0.000295287	0	1	1
Tb927.7.7060	Tb927.7.7060	Tb927.07.7060	Got1/Sft2-like family, putative	ZUnknown	258.5	0.7206	3.28e-07	0	0	1	0	0.1578	0.999265	0	0	1
Tb927.7.7090	Tb927.7.7090	Tb927.07.7090	hypothetical protein, conserved, no clear yeast or human matches	ZUnknown	1024.9	0.9255	9.58e-25	0	0	1	0	0.2861	0.965118	0	0	1
Tb927.8.930	Tb927.8.930	Tb927.08.0930	hypothetical protein, conserved, predicted GPI anchor	Membrane.protein	1626.6	0.6646	2.65e-19	0	0	1	0	1.0848	0.0291829	1	0	1
Tb927.8.950	Tb927.8.950	Tb927.08.0950	hypothetical protein, conserved, predicted GPI anchor	Membrane.protein	1893.6	0.7086	5.36e-21	0	0	1	0	0.7528	0.16842	0	0	0
Tb927.8.2630	Tb927.8.2630	Tb927.08.2630	KIN-C. Trypanosome-specific kinesin family 2	Cytoskeleton	4901.2	0.8383	8.17e-30	0	0	1	0	0.7608	0.0906388	0	0	1
Tb927.8.2850	Tb927.8.2850	Tb927.08.2850	PARN-1	RNA.degradation	1472.5	0.9528	1.74e-37	0	0	1	0	0.7311	2.9103e-07	0	0	1
Tb927.8.3940	Tb927.8.3940	Tb927.08.3940	hypothetical protein, conserved	ZUnknown	905	0.6818	7.18e-15	0	0	1	0	0.9327	5.2981e-05	0	0	1
Tb927.8.4700	Tb927.8.4700	Tb927.08.4700	AAT5 Arginine transporter	Amino.acid.transport	931.6	0.9224	7.88e-17	0	0	1	0	0.4322	0.364183	0	0	1
Tb927.8.5160	Tb927.8.5160	Tb927.08.5160	hypothetical protein, conserved	ZUnknown	2283.3	0.5924	7.19e-16	0	0	1	0	0.1857	0.928165	0	0	1
Tb927.8.5390	Tb927.8.5390	Tb927.08.5390	CRK4 cdc2- like protein kinase	Cell.cycle	499.2	0.6335	2.14e-08	0	0	1	0	0.4497	0.3043	0	0	1
Tb927.8.5870	Tb927.8.5870	Tb927.08.5870	hypothetical protein, conserved	ZUnknown	599.9	0.5938	3.31e-09	0	0	1	0	0.4042	0.144811	0	0	1
Tb927.8.5910	Tb927.8.5910	Tb927.08.5910	hypothetical protein	ZUnknown	1066.9	0.6065	4.83e-12	0	0	1	0	0.4435	0.436803	0	0	1
Tb927.8.6080	Tb927.8.6080	Tb927.08.6080	POMP42, Glycerophosphoryl diester phosphodiesterase family	Mito.pathway	1064	0.7181	3.83e-17	0	0	1	0	0.6513	0.0909749	0	0	1
Tb927.8.6700	Tb927.8.6700	Tb927.08.6700	hypothetical protein, conserved	ZUnknown	1081.2	0.7744	1.72e-20	0	0	1	0	0.8471	0.138022	0	0	0
Tb927.8.6890	Tb927.8.6890	Tb927.08.6890	hypothetical protein, conserved	ZUnknown	550.3	0.8018	4.51e-11	0	0	1	0	0.1745	0.982676	0	0	1
Tb927.8.7280	Tb927.8.7280	Tb927.08.7280	emp24/gp25L/p24 family/GOLD, putative	Vesicular.transport	521.8	0.8021	1.44e-13	0	0	1	0	0.347	0.25286	0	0	1
Tb927.8.7440	Tb927.8.7440	Tb927.08.7440	lipase, putative	Lipids	1852.8	0.8694	4.55e-32	0	0	1	0	0.1878	0.327002	0	0	1
Tb927.8.7550	Tb927.8.7550	Tb927.08.7550	hypothetical protein	ZUnknown	1144.3	0.7844	5.3e-22	0	0	1	0	1.1481	0.0200389	1	0	1
Tb927.8.7730	Tb927.8.7730	Tb927.08.7730	Sphingosine N-acyltransferase, putative	Lipids	740.4	0.6604	3.76e-11	0	0	1	0	-0.4471	0.0600966	0	0	1
Tb927.9.1960	Tb927.9.1960	Tb927.09.01960	nitrilase, putative	Amino.acids	1523.9	0.9562	1.11e-38	0	0	1	0	0.4092	0.463623	0	0	1
Tb927.9.2450	Tb927.9.2450	Tb927.09.02450	electron transport protein SCO1/SCO2, putative	Mito.e.transport	850.9	0.6983	5.57e-16	0	0	1	0	0.2676	0.943774	0	0	1
Tb927.9.2840	Tb927.9.2840	Tb927.09.02840	Fam77 cell surface phylome protein	ZUnknown	102	0.7901	0.000334	0	0	1	0			0	0	1
Tb927.9.2845	Tb927.9.2845	Tb927.09.02845	Domain of unknown function (DUF5075), putative	ZUnknown	184.2	0.7556	3.98e-06	0	0	1	0	0.2005	0.999265	0	0	0
Tb927.9.2853.1-p1-CDS1	Tb927.9.2853	Tb927.09.02853	hypothetical protein, conserved	ZUnknown	189.6	0.7043	0.000131	0	0	1	0	0.3378	0.999265	0	0	0
Tb927.9.2855	Tb927.9.2855	Tb927.09.02855	Domain of unknown function (DUF5075), putative	ZUnknown	322.8	0.7752	1.09e-09	0	0	1	0	0.3091	0.999265	0	0	0
Tb927.9.2860.1-p1-CDS1	Tb927.9.2860	Tb927.09.02860	hypothetical protein, conserved	ZUnknown	131.6	0.9417	4.67e-06	0	0	1	0			0	0	0
Tb927.9.2861	Tb927.9.2861	Tb927.09.02861	Domain of unknown function (DUF5075), putative	ZUnknown	276.4	0.845	1.34e-09	0	0	1	0			0	0	0
Tb927.9.2865	Tb927.9.2865	Tb927.09.02865	Domain of unknown function (DUF5075), putative	ZUnknown	122	0.8435	2.24e-05	0	0	1	0			0	0	0
Tb927.9.2871	Tb927.9.2871	Tb927.09.02871	Domain of unknown function (DUF5075), putative	ZUnknown	136.8	0.7248	0.000122	0	0	1	0	0.5025	0.999265	0	0	0
Tb927.9.2875	Tb927.9.2875	Tb927.09.02875	Domain of unknown function (DUF5075), putative	ZUnknown	307.7	0.8079	2.82e-10	0	0	1	0	0.6509	0.818589	0	0	0
Tb927.9.2881	Tb927.9.2881	Tb927.09.02881	Domain of unknown function (DUF5075), putative	ZUnknown	133.5	0.8208	5.93e-05	0	0	1	0	0.0412	0.999265	0	0	0
Tb927.9.2885	Tb927.9.2885	Tb927.09.02885	Domain of unknown function (DUF5075), putative	ZUnknown	280.5	0.7012	5.4e-06	0	0	1	0	0.1303	0.999265	0	0	0
Tb927.9.2891	Tb927.9.2891	Tb927.09.02891	Domain of unknown function (DUF5075), putative	ZUnknown	2428.9	0.7961	6.77e-16	0	0	1	0	0.2368	0.999265	0	0	0
Tb927.9.4560	Tb927.9.4560	Tb927.09.04560	RBP32	RNA.binding	2490.1	0.8509	4.5e-28	0	0	1	0	0.9295	0.101877	0	0	1
Tb927.9.5370	Tb927.9.5370	Tb927.09.05370	2OG-Fe(II) oxygenase superfamily, putative	ZUnknown	892.3	0.9462	7.61e-26	0	0	1	0	0.5226	0.34704	0	0	1
Tb927.9.5900	Tb927.9.5900	Tb927.09.05900	glutamate dehydrogenase (GDH)	Mito.citric.acid.cycle	4751.8	0.943	3.32e-56	0	0	1	0	0.4346	0.905028	0	0	1
Tb927.9.5960	Tb927.9.5960	Tb927.09.05960	SDH2C succinate dehydrogenase (complex II) subunit	Mito.e.transport	878.7	0.9847	1.71e-21	0	0	1	0	0.2021	0.990279	0	0	1
Tb927.9.6620	Tb927.9.6620	Tb927.09.06620	hypothetical protein, conserved	Mito.pathway	483.3	0.8474	2.06e-12	0	0	1	0	-0.3359	0.0377169	0	0	1
Tb927.9.6960	Tb927.9.6960	Tb927.09.06960	hypothetical protein, conserved	ZUnknown	319.1	0.6018	1.61e-05	0	0	1	0	1.1075	0.00938616	1	0	1
Tb927.9.7100	Tb927.9.7100	Tb927.09.07100	hypothetical protein, conserved	ZUnknown	493	0.6131	3.4e-08	0	0	1	0	0.6647	0.0194068	0	0	1
Tb927.9.7830	Tb927.9.7830	Tb927.09.07830	mitochondrial tRNA import complex, putative	Mito.biogenesis	1277.3	0.7315	6.99e-10	0	0	1	0	-0.2787	0.997841	0	0	1
Tb927.9.8030	Tb927.9.8030	Tb927.09.08030	hypothetical protein, conserved	ZUnknown	837.2	0.8129	2.52e-19	0	0	1	0	0.8245	0.0107257	0	0	1
Tb927.9.8330	Tb927.9.8330	Tb927.09.08330	hypothetical protein	ZUnknown	1690	0.7464	3.35e-22	0	0	1	0	0.8474	0.137148	0	0	1
Tb927.9.9370	Tb927.9.9370	Tb927.09.09370	PSP1 C-terminal conserved region, putative	ZUnknown	774.8	0.9356	1.19e-23	0	0	1	0	1.7456	3.65095e-09	1	0	1
Tb927.9.12700	Tb927.9.12700	Tb927.09.12700	phospholipase A1, putative flippase	Lipids	3443	0.6407	2.82e-23	0	0	1	0	0.0262	0.999265	0	0	1
Tb927.9.12790	Tb927.9.12790	Tb927.09.12790	dolichol kinase, putative	Glycans	2059.2	0.7525	5.25e-26	0	0	1	0	0.0944	0.999265	0	0	1
Tb927.9.13200	Tb927.9.13200	Tb927.09.13200	hypothetical protein	ZUnknown	477.4	0.6779	1.13e-06	0	0	1	0	-0.8922	0.00425802	0	0	1
Tb927.9.13360	Tb927.9.13360	Tb927.09.13360	ubiquitin-protein ligase, putative (upl3)	Ubiquitin.proteasome	10074.8	0.5904	3.04e-24	0	0	1	0	1.8036	1.52114e-08	1	0	1
Tb927.9.14990	Tb927.9.14990	Tb927.09.14990	hypothetical protein, conserved, no clear yeast or human matches	ZUnknown	376.7	0.6391	5.03e-08	0	0	1	0	-0.0616	0.999265	0	0	1
Tb927.9.15530	Tb927.9.15530	Tb927.09.15530	BARP protein	Membrane.protein	612.8	0.6772	1.68e-10	0	0	1	0	1.079	0.0102451	1	0	0
Tb927.9.15540	Tb927.9.15540	Tb927.09.15540	BARP protein	Membrane.protein	232.3	0.588	0.000189	0	0	1	0	1.4355	0.0213907	1	0	0
Tb927.9.15570	Tb927.9.15570	Tb927.09.15570	BARP protein	Membrane.protein	185.7	0.636	0.000562	0	0	1	0	0.5585	0.526532	0	0	0
Tb927.9.15600	Tb927.9.15600	Tb927.09.15600	BARP protein	Membrane.protein	286.4	0.7218	5.06e-08	0	0	1	0	0.666	0.220316	0	0	0
Tb927.9.15620	Tb927.9.15620	Tb927.09.15620	BARP protein	Membrane.protein	161.6	0.7402	2.54e-05	0	0	1	0	0.5413	0.446208	0	0	0
Tb927.9.15630	Tb927.9.15630	Tb927.09.15630	BARP protein	Membrane.protein	225.1	0.9445	1.49e-10	0	0	1	0	0.5584	0.1485	0	0	0
Tb927.10.480	Tb927.10.480	Tb927.10.00480	hypothetical protein, conserved, poly(Q), Kinetoplastid-specific	ZUnknown	587.4	0.6102	5.75e-09	0	0	1	0	2.6914	9.12134e-08	1	0	1
Tb927.10.620	Tb927.10.620	Tb927.10.00620	hypothetical protein, conserved	ZUnknown	3589.1	0.6326	3.68e-20	0	0	1	0	1.6509	1.25274e-05	1	0	1
Tb927.10.780	Tb927.10.780	Tb927.10.00780	Ring finger domain containing protein, putative	ZUnknown	1028.9	0.692	3.98e-13	0	0	1	0	0.8221	0.180576	0	0	1
Tb927.10.1030	Tb927.10.1030	Tb927.10.01030	serine peptidase, Clan SC, Family S10 (CBP1)	Protease	2385	0.813	2.4e-19	0	0	1	0	0.6667	0.0221408	0	0	0
Tb927.10.1110	Tb927.10.1110	Tb927.10.01110	Trypanosome-specific kinesin family 2	Cytoskeleton	3159.2	0.8341	5.22e-37	0	0	1	0	1.0592	0.0482268	1	0	1
Tb927.10.2070	Tb927.10.2070	Tb927.10.02070	hypothetical protein, conserved	ZUnknown	284.7	0.7186	4.63e-08	0	0	1	0	-0.004	0.999265	0	0	1
Tb927.10.2420	Tb927.10.2420	Tb927.10.02420	hypothetical protein	ZUnknown	169.9	0.8015	7.45e-06	0	0	1	0	-0.1085	0.985724	0	0	1
Tb927.10.3600	Tb927.10.3600	Tb927.10.03600	hypothetical protein, conserved	ZUnknown	964.5	0.6286	9.07e-12	0	0	1	0	1.2496	0.0284428	1	0	1
Tb927.10.4040	Tb927.10.4040	Tb927.10.04040	3-Ketosphinganine reductase	Lipids	1882.5	0.7422	9.83e-23	0	0	1	0	0.2891	0.718708	0	0	1
Tb927.10.4280	Tb927.10.4280	Tb927.10.04280	Complex III cytochrome b/c complex, Cytochrome bd ubiquinol oxidase, 14kDa subunit	Mito.e.transport	416.3	0.7035	5.82e-10	0	0	1	0	-0.4025	0.208484	0	0	1
Tb927.10.4430	Tb927.10.4430	Tb927.10.04430	PUF1	RNA.binding	1652.1	0.6992	1.12e-19	0	0	1	0	1.8852	5.46812e-12	1	0	1
Tb927.10.4780	Tb927.10.4780	Tb927.10.04780	GPI inositol deacylase precursor (GPIdeAc)	GPI.anchors	4111.3	0.6837	5.03e-30	0	0	1	0	0.5512	0.123931	0	0	1
Tb927.10.4880	Tb927.10.4880	Tb927.10.04880	hypothetical protein, possible component of cytochorome oxidase complex	Mito.e.transport	1176.2	0.8095	6.25e-24	0	0	1	0	0.0951	0.999265	0	0	1
Tb927.10.5090	Tb927.10.5090	Tb927.10.05090	ESP18 Enriched in surface-labeled proteome	Membrane.protein	542.6	0.644	1.14e-09	0	0	1	0	1.2029	0.00062459	1	0	1
Tb927.10.5150	Tb927.10.5150	Tb927.10.05150	ZC3H31	RNA.binding	1214.8	0.669	1.33e-17	0	0	1	0	4.4281	1.88728e-32	1	0	1
Tb927.10.5500	Tb927.10.5500	Tb927.10.05500	hypothetical protein, conserved,, in NADH dehydrogenase complex	Mito.e.transport	1120	0.6987	1.54e-17	0	0	1	0	0.1111	0.770969	0	0	1
Tb927.10.5880	Tb927.10.5880	Tb927.10.05880	Proteophosphoglycan, putative	ZUnknown	3693.4	0.8539	2.18e-42	0	0	1	0	0.9273	0.0963177	0	0	1
Tb927.10.7040	Tb927.10.7040	Tb927.10.07040	hypothetical protein, conserved	ZUnknown	953	0.6364	4.15e-13	0	0	1	0	0.4102	0.931666	0	0	1
Tb927.10.7290	Tb927.10.7290	Tb927.10.07290	Flagellar Member 2 (FLAM2)	Cytoskeleton	4074.5	0.6176	3.52e-22	0	0	1	0	0.7116	0.242552	0	0	1
Tb927.10.8020	Tb927.10.8020	Tb927.10.08020	prolyl endopeptidase (POP)	Protease	8288.3	0.7347	1.85e-34	0	0	1	0	0.1435	0.999265	0	0	1
Tb927.10.8280	Tb927.10.8280	Tb927.10.08280	U1A small nuclear ribonucleoprotein (RBP14B)	RNA.processing	197.1	0.6019	0.000253	0	0	1	0	3.5777	0.973555	0	0	0
Tb927.10.8320	Tb927.10.8320	Tb927.10.08320	cytochrome oxidase subunit IX (COXIX)	Mito.e.transport	786.2	0.7225	7.23e-12	0	0	1	0	-0.0478	0.999265	0	0	1
Tb927.10.8730	Tb927.10.8730	Tb927.10.08730	ABC1 family, putative	Mito.pathway	2075	0.9656	3.38e-43	0	0	1	0	1.1527	0.021882	1	0	1
Tb927.10.8740	Tb927.10.8740	Tb927.10.08740	hypothetical protein	ZUnknown	544.3	0.7758	1.69e-13	0	0	1	0	0.5287	0.101425	0	0	1
Tb927.10.8890	Tb927.10.8890	Tb927.10.08890	kinetoplast DNA-associated protein, putative	Mito.DNA	1193.3	0.6083	2.46e-13	0	0	1	0	0.459	0.777076	0	0	1
Tb927.10.9040	Tb927.10.9040	Tb927.10.09040	hypothetical protein, conserved	ZUnknown	2802.3	0.6129	2.55e-21	0	0	1	0	0.0163	0.999265	0	0	1
Tb927.10.9080	Tb927.10.9080	Tb927.10.09080	pteridine transporter, putative	Transporter	7263.8	0.7938	2.51e-36	0	0	1	0	-0.0948	0.999265	0	0	1
Tb927.10.9320	Tb927.10.9320	Tb927.10.09320	hypothetical protein, conserved	ZUnknown	284.8	0.7274	9.58e-08	0	0	1	0	0.327	0.845867	0	0	1
Tb927.10.11220	Tb927.10.11220	Tb927.10.11220	procyclic form surface glycoprotein (PSSA-2)	Membrane.protein	827.9	0.6285	3.55e-12	0	0	1	0	-0.2528	0.857116	0	0	1
Tb927.10.11970	Tb927.10.11970	Tb927.10.11970	glutamine aminotransferase (GlnAT)	Amino.acids	1505.2	0.668	1.22e-14	0	0	1	0	-0.3843	0.398832	0	0	1
Tb927.10.12170	Tb927.10.12170	Tb927.10.12170	RAB-interacting protein, putative	Signalling	940.7	0.8804	9.54e-22	0	0	1	0	0.5493	0.000204946	0	0	1
Tb927.10.12260	Tb927.10.12260	Tb927.10.12260	Zn-dependent peptidase (M20/M25/M40 family)	Protease	3007.1	0.8814	2.36e-39	0	0	1	0	-0.7045	0.00690848	0	0	1
Tb927.10.13400	Tb927.10.13400	Tb927.10.13400	Phosphatidic acid phostphatase, putative	Lipids	619.7	0.6486	4.62e-10	0	0	1	0	0.4781	0.337279	0	0	1
Tb927.10.13560	Tb927.10.13560	Tb927.10.13560	Mevalonate-diphosphate decarboxylase	Prenylation	865.8	0.7216	3.2e-16	0	0	1	0	-0.0476	0.999265	0	0	1
Tb927.10.13780	Tb927.10.13780	Tb927.10.13780	GSK3-short glycogen synthase kinase 3	Glycans	2804.2	0.664	2.45e-22	0	0	1	0	1.0309	0.000210306	1	0	1
Tb927.10.13840	Tb927.10.13840	Tb927.10.13840	Domain of unknown function (DUF4475), putative	ZUnknown	1297.9	0.9075	2.59e-32	0	0	1	0	0.6999	2.7085e-08	0	0	1
Tb927.10.14000	Tb927.10.14000	Tb927.10.14000	aconitase (ACO)	Mito.citric.acid.cycle	2551.3	0.7935	4.13e-32	0	0	1	0	0.6709	0.00614466	0	0	1
Tb927.10.14070	Tb927.10.14070	Tb927.10.14070	mevalonate diphosphate decarboxylase	Prenylation	758.3	0.6666	5.03e-12	0	0	1	0	-0.4737	0.999265	0	0	0
Tb927.10.14950	Tb927.10.14950	Tb927.10.14950	ZC3H40	RNA.binding	2036.7	0.6974	3.53e-21	0	0	1	0	0.4759	0.310649	0	0	1
Tb927.10.16100	Tb927.10.16100	Tb927.10.16100	FK506-binding protein (FKBP)-type peptidyl-prolyl isomerase	Chaperone	4209	0.807	3.09e-22	0	0	1	0	0.5733	0.0226027	0	0	1
Tb927.11.520	Tb927.11.520	Tb927.11.00520	hypothetical protein, tryp specific	ZUnknown	1245.6	0.8171	3.76e-26	0	0	1	0	0.1002	0.999265	0	0	1
Tb927.11.3080	Tb927.11.3080	Tb927.11.03080	vesicular protein trafficking mediator, putative	Vesicular.transport	1262.6	0.8582	2.04e-23	0	0	1	0	-0.0028	0.999265	0	0	1
Tb927.11.4870	Tb927.11.4870	Tb927.11.04870	hypothetical protein, conserved, no clear yeast or human matches, domain of unknown funciton	Mito.pathway	557.7	0.593	3.61e-08	0	0	1	0	-0.2185	0.79433	0	0	1
Tb927.11.5290	Tb927.11.5290	Tb927.11.05290	mitochondrial carrier protein, MCP9	Mito.transport	1323.3	0.6135	5.04e-13	0	0	1	0	-0.2618	0.631736	0	0	1
Tb927.11.5450	Tb927.11.5450	Tb927.11.05450	malic enzyme	Mito.pathway	4466.5	0.624	2.49e-23	0	0	1	0	0.8347	0.0322992	0	0	1
Tb927.11.6570	Tb927.11.6570	Tb927.11.06570	transporter, putative. 14 TM domains, SSF103473 general substrate transporter family	Transporter	6665.2	0.7369	6.84e-36	0	0	1	0	-0.0048	0.999265	0	0	1
Tb927.11.6590	Tb927.11.6590	Tb927.11.06590	aminopeptidase, putative,metallo-peptidase, Clan MF, Family M17	Protease	3781.1	0.6213	8.17e-14	0	0	1	0	-0.1157	0.999265	0	0	1
Tb927.11.6700	Tb927.11.6700	Tb927.11.06700	hypothetical protein, conserved	ZUnknown	580.5	0.8891	1.18e-17	0	0	1	0	0.2124	0.916669	0	0	1
Tb927.11.8430	Tb927.11.8430	Tb927.11.08430	hypothetical protein, conserved	ZUnknown	1499	0.9524	4.15e-36	0	0	1	0	1.4584	2.83614e-26	1	0	1
Tb927.11.8470	Tb927.11.8470	Tb927.11.08470	ZC3H45	RNA.binding	579	0.7638	1.03e-12	0	0	1	0	2.9414	3.12075e-11	1	0	1
Tb927.11.9250	Tb927.11.9250	Tb927.11.09250	hypothetical protein, conserved	ZUnknown	3105.9	0.6479	4.68e-24	0	0	1	0	0.392	0.824303	0	0	1
Tb927.11.9850	Tb927.11.9850	Tb927.11.09850	hypothetical protein, conserved	ZUnknown	278.5	0.5981	3.64e-05	0	0	1	0	0.3807	0.663785	0	0	1
Tb927.11.10470	Tb927.11.10470	Tb927.11.10470	hypothetical protein, conserved	ZUnknown	2032.6	0.7731	5.4e-28	0	0	1	0	1.0154	4.68521e-12	1	0	1
Tb927.11.12040	Tb927.11.12040	Tb927.11.12040	component of cytochrome c oxidase complex	Mito.e.transport	958.5	0.8524	9.8e-18	0	0	1	0	0.0408	0.999265	0	0	1
Tb927.11.12100	Tb927.11.12100	Tb927.11.12100	RBP5	RNA.binding	728.4	0.9022	7.97e-21	0	0	1	0	0.7202	0.3043	0	0	1
Tb927.11.12140	Tb927.11.12140	Tb927.11.12140	hypothetical protein	ZUnknown	479.6	0.6301	0.0471	0	0	1	0	1.2732	0.149026	0	0	1
Tb927.11.12180	Tb927.11.12180	Tb927.11.12180	kinesin, 4/10 family.	Cytoskeleton	2284.2	0.7701	4.69e-22	0	0	1	0	1.7951	4.55034e-05	1	0	1
Tb927.11.12620	Tb927.11.12620	Tb927.11.12620	Glucosidase II beta subunit-like, putative	ZUnknown	1694.6	0.9955	1.16e-38	0	0	1	0	0.8534	0.193966	0	0	1
Tb927.11.12700	Tb927.11.12700	Tb927.11.12700	hypothetical protein, conserved	ZUnknown	285.9	0.6739	2.89e-07	0	0	1	0	0.8488	0.0103818	0	0	1
Tb927.11.12850	Tb927.11.12850	Tb927.11.12850	oligopeptidase b (OPB)	Protease	8972.3	0.7988	4.41e-46	0	0	1	0	0.0709	0.999265	0	0	1
Tb927.11.13650	Tb927.11.13650	Tb927.11.13650	cytochrome b5, putative (CYB5)	Mito.e.transport	440.6	0.7041	5.38e-09	0	0	1	0	0.1041	0.999265	0	0	1
Tb927.11.13880	Tb927.11.13880	Tb927.11.13880	kinetoplastid-specific protein tyrosine phosphatase, putative	Protein.phosphatase	821.8	0.6002	4.53e-11	0	0	1	0	-0.1043	0.999265	0	0	1
Tb927.11.14060	Tb927.11.14060	Tb927.11.14060	hypothetical protein, conserved	ZUnknown	792.7	0.6463	2.94e-12	0	0	1	0	0.1818	0.757247	0	0	1
Tb927.11.15240	Tb927.11.15240	Tb927.11.15240	Ras-related protein RAB2B, putative	Vesicular.transport	1355.4	0.6858	2.59e-19	0	0	1	0	0.7818	0.204407	0	0	1
Tb927.11.15320	Tb927.11.15320	Tb927.11.15320	hypothetical protein	ZUnknown	1714.9	0.9508	2.4e-40	0	0	1	0	1.4884	7.6767e-11	1	0	1
Tb927.11.15540	Tb927.11.15540	Tb927.11.15540	hypothetical protein, conserved	ZUnknown	273.8	0.6757	2.5e-06	0	0	1	0	0.393	0.216076	0	0	1
Tb927.11.15780	Tb927.11.15780	Tb927.11.15780	hypothetical protein, conserved, no clear yeast or human matches, resemblance to MIC17 not blast-back positive	ZUnknown	177.6	0.7524	9.83e-06	0	0	1	0	0.0498	0.999265	0	0	1
Tb927.11.16200	Tb927.11.16200	Tb927.11.16200	microtubule-associated protein,corset-associated protein 17 (CAP17)	Cytoskeleton	614.7	0.7754	6.64e-13	0	0	1	0	0.4674	0.987921	0	0	1
Tb927.11.16320	Tb927.11.16320	Tb927.11.16320	hypothetical protein, conserved	ZUnknown	580.2	0.5923	1.92e-08	0	0	1	0	-0.0645	0.999265	0	0	1
Tb927.11.16390	Tb927.11.16390	Tb927.11.16390	(CKS1 cyclin dependent kinases regulatory subunit, putative	Cell.cycle	621.2	0.6476	4.42e-09	0	0	1	0	0.2039	0.74943	0	0	1
Tb927.11.16710	Tb927.11.16710	Tb927.11.16710	hypothetical protein, conserved	ZUnknown	296.5	0.6901	4.27e-07	0	0	1	0	-0.1329	0.979719	0	0	1
Tb927.3.1500	Tb927.3.1500	#N/A	variant surface glycoprotein (VSG)-related, putative	VSG	928.8	0.7894	7.27e-17	0	0	1	0	-1.3482	0.943702	0	0	0
Tb927.3.1510	Tb927.3.1510	#N/A	variant surface glycoprotein (VSG)-related, putative	VSG	520.8	0.7801	8.2e-12	0	0	1	0	0.1342	0.999265	0	0	0
Tb927.4.2265	Tb927.4.2265	#N/A	hypothetical protein	ZUnknown	636.5	0.7953	2.16e-12	0	0	1	0	2.6176	2.23112e-12	1	0	1
Tb927.5.330	Tb927.5.330	#N/A	GRESAG 4, putative receptor-type adenylate cyclase	GRESAG	1375.7	0.9608	5.83e-32	0	0	1	0	0.8745	0.0260273	0	0	0
Tb927.5.650	Tb927.5.650	#N/A	GRESAG 4, putative receptor-type adenylate cyclase	GRESAG	1661.7	0.747	2.98e-20	0	0	1	0	0.3612	0.324395	0	0	1
Tb927.5.2325	Tb927.5.2325	#N/A	hypothetical protein	ZUnknown	389.1	0.9452	3.28e-14	0	0	1	0	0.6795	0.0387986	0	0	1
Tb927.5.2490	Tb927.5.2490	#N/A	hypothetical protein, conserved (pseudogene)	Pseudogene	1445.7	0.7978	4.37e-19	0	0	1	0	1.0482	0.000541026	1	0	0
Tb927.6.150	Tb927.6.150	#N/A	retrotransposon hot spot protein (RHS3, pseudogene), putative	RHS	1767.9	0.874	3.21e-23	0	0	1	0	0.5394	0.811035	0	0	0
Tb927.6.5095	Tb927.6.5095	#N/A	hypothetical protein	ZUnknown	632	0.6197	4.88e-09	0	0	1	0	-0.1234	0.999265	0	0	1
Tb927.7.4645	Tb927.7.4645	#N/A	hypothetical protein	ZUnknown	54.1	0.6633	0.0386	0	0	1	0	0.8837	0.152996	0	0	0
Tb927.7.5795	Tb927.7.5795	#N/A	hypothetical protein	ZUnknown	749.3	0.6617	2.15e-10	0	0	1	0	0.6477	0.503333	0	0	1
Tb927.7.6330	Tb927.7.6330	#N/A	hypothetical protein	ZUnknown	735.3	0.9639	2.31e-11	0	0	1	0	1.0402	0.0425699	1	0	1
Tb927.8.490	Tb927.8.490	#N/A	hypothetical protein	ZUnknown	195.3	0.9136	3.25e-08	0	0	1	0	0.5964	0.991041	0	0	1
Tb927.8.4695	Tb927.8.4695	#N/A	hypothetical protein	ZUnknown	255.9	0.5951	0.000136	0	0	1	0	0.3936	0.686722	0	0	1
Tb927.9.1365	Tb927.9.1365	#N/A	hypothetical protein	ZUnknown	345.6	0.6517	1.14e-06	0	0	1	0	0.1523	0.999265	0	0	1
Tb927.9.2811	Tb927.9.2811	#N/A	Domain of unknown function (DUF5075), putative	ZUnknown	268.2	0.6789	2.61e-05	0	0	1	0	0.3657	0.991626	0	0	0
Tb927.10.7160	Tb927.10.7160	#N/A	procyclin-associated gene 1 (PAG1) protein, putative	PAG	25.5	0.9471	0.0393	0	0	1	0	0.4599	0.999265	0	0	0
Tb927.10.7660	Tb927.10.7660	#N/A	hypothetical protein	ZUnknown	126.8	0.6084	0.00279	0	0	1	0	1.42	0.0560468	0	0	1
Tb927.10.7925	Tb927.10.7925	#N/A	hypothetical protein	ZUnknown	212.4	0.7259	1.29e-06	0	0	1	0	0.0016	0.999915	0	0	0
Tb927.10.8375	Tb927.10.8375	#N/A	hypothetical protein	ZUnknown	619.7	0.7096	4.84e-12	0	0	1	0	0.1148	0.999265	0	0	1
Tb927.10.10270	Tb927.10.10270	#N/A	hypothetical protein, no non-kinetoplastid matches, no domains	ZUnknown	78.5	0.8243	0.00112	0	0	1	0	1.4802	1.06871e-13	1	0	1
Tb927.10.15033	Tb927.10.15033	#N/A	hypothetical protein	ZUnknown	678.3	0.8011	3.16e-16	0	0	1	0	2.3584	1.34619e-27	1	0	1
Tb927.10.15620	Tb927.10.15620	#N/A	hypothetical protein	ZUnknown	395.8	0.8004	2.99e-08	0	0	1	0	1.739	1.29742e-05	1	0	1
Tb927.11.164	Tb927.11.164	#N/A	hypothetical protein	ZUnknown	147.1	0.6875	0.000243	0	0	1	0	0.5803	0.794389	0	0	1
Tb927.11.2245	Tb927.11.2245	#N/A	hypothetical protein	ZUnknown	920.7	0.8542	2.84e-23	0	0	1	0	-0.1248	0.999265	0	0	1
Tb927.11.7700.1-p1-CDS1	Tb927.11.7700	#N/A	hypothetical protein	ZUnknown	510.1	0.636	4.72e-09	0	0	1	0	0.0873	0.999265	0	0	1
Tb927.11.13980	Tb927.11.13980	#N/A	Outer row dynein-assembly protein 7 (ODA7)	ZUnknown	1870	0.5885	1.17e-16	0	0	1	0	0.1483	0.802731	0	0	1
Tb927.11.16575	Tb927.11.16575	#N/A	hypothetical protein	ZUnknown	487.8	0.9768	1.12e-16	0	0	1	0	-0.2296	0.858469	0	0	1
Tb927.11.17015	Tb927.11.17015	#N/A	Cytochrome c oxidase assembly factor 6 homolog, putative	Mito.e.transport	469.9	0.8699	1.2e-13	0	0	1	0	-0.2046	0.973923	0	0	1
Tb05.5K5.30	Tb05.5K5.30	#N/A	serine/threonine protein phosphatase, putative	Protein.phosphatase	3438.4	0.7113	4.26e-25	0	0	1	0			0	0	0
Tb08.27P2.90	Tb08.27P2.90	#N/A	hypothetical protein	ZUnknown	682.4	0.7738	2.13e-11	0	0	1	0			0	0	0
Tb09.v4.0058	Tb09.v4.0058	#N/A	hypothetical protein	ZUnknown	475.5	0.7022	3.31e-09	0	0	1	0			0	0	0
Tb09.v4.0059	Tb09.v4.0059	#N/A	hypothetical protein	ZUnknown	391.8	0.7527	8.44e-09	0	0	1	0			0	0	0
Tb09.v4.0060	Tb09.v4.0060	#N/A	hypothetical protein	ZUnknown	985.6	0.6613	1.36e-06	0	0	1	0			0	0	0
Tb09.v4.0146	Tb09.v4.0146	#N/A	hypothetical protein	ZUnknown	918.1	0.7978	2.2e-17	0	0	1	0			0	0	0
Tb09.v4.0147	Tb09.v4.0147	#N/A	hypothetical protein	ZUnknown	775.4	0.7566	1.66e-14	0	0	1	0			0	0	0
Tb09.v4.0148	Tb09.v4.0148	#N/A	hypothetical protein	ZUnknown	679.5	0.7639	2.5e-12	0	0	1	0			0	0	0
Tb09.v4.0149	Tb09.v4.0149	#N/A	hypothetical protein	ZUnknown	749.7	0.7627	4.54e-10	0	0	1	0			0	0	0
Tb1.NT.24	Tb1.NT.24	#N/A	Noncoding RNA, putative	ncRNA	1506.6	0.7505	8.01e-14	0	0	1	0			0	0	0
Tb10.NT.22	Tb10.NT.22	#N/A	Noncoding RNA, putative	ncRNA	222	0.8678	4.18e-08	0	0	1	0			0	0	0
Tb10.NT.66	Tb10.NT.66	#N/A	Noncoding RNA, putative	ncRNA	225.4	0.7391	2.81e-06	0	0	1	0			0	0	0
Tb10.NT.68	Tb10.NT.68	#N/A	Noncoding RNA, putative	ncRNA	114.5	0.8494	7.73e-05	0	0	1	0			0	0	0
Tb10.NT.95	Tb10.NT.95	#N/A	Noncoding RNA, putative	ncRNA	282.7	0.7555	1.29e-08	0	0	1	0			0	0	0
Tb10.v4.0033	Tb10.v4.0033	#N/A	PUF1	RNA.binding	1625.3	0.7169	1.42e-17	0	0	1	0			0	0	0
Tb11.02.5070b.1-p1-CDS1	Tb11.02.5070b	#N/A	hypothetical protein, conserved	ZUnknown	503.1	0.6088	4.12e-08	0	0	1	0			0	0	0
Tb11.NT.210	Tb11.NT.210	#N/A	Noncoding RNA, putative	ncRNA	153.6	0.6927	0.000339	0	0	1	0			0	0	0
Tb11.NT.33	Tb11.NT.33	#N/A	Noncoding RNA, putative	ncRNA	213.8	0.7747	5.57e-07	0	0	1	0			0	0	0
Tb11.NT.60	Tb11.NT.60	#N/A	Noncoding RNA, putative	ncRNA	441	0.6534	5.63e-09	0	0	1	0			0	0	0
Tb11.NT.81	Tb11.NT.81	#N/A	Noncoding RNA, putative	ncRNA	272.6	0.6598	6.05e-06	0	0	1	0			0	0	0
Tb11.v5.0178.1-p1-CDS1	Tb11.v5.0178	#N/A	glutamine synthetase, putative	Amino.acids	487	0.7877	3.82e-13	0	0	1	0			0	0	0
Tb11.v5.0223.1-p1-CDS1	Tb11.v5.0223	#N/A	BNR repeat-like domain/Concanavalin A-like lectin/glucanases superfamily, putative	ZUnknown	577.3	0.6851	1.66e-11	0	0	1	0			0	0	0
Tb11.v5.0315.1-p1-CDS1	Tb11.v5.0315	#N/A	hypothetical protein, conserved	ZUnknown	558.2	0.5893	7.87e-08	0	0	1	0			0	0	0
Tb11.v5.0338.1-p1-CDS1	Tb11.v5.0338	#N/A	hypothetical protein, conserved	ZUnknown	563.6	0.5861	2.8e-08	0	0	1	0			0	0	0
Tb11.v5.0343.1-p1-CDS1	Tb11.v5.0343	#N/A	BarP protein, putative	Membrane.protein	258.1	0.9695	6.44e-12	0	0	1	0			0	0	0
Tb11.v5.0344.1-p1-CDS1	Tb11.v5.0344	#N/A	BarP protein, putative	Membrane.protein	666.4	0.728	2.7e-13	0	0	1	0			0	0	0
Tb11.v5.0345.1-p1-CDS1	Tb11.v5.0345	#N/A	BarP protein, putative	Membrane.protein	400.4	0.6118	7.67e-07	0	0	1	0			0	0	0
Tb11.v5.0346.1-p1-CDS1	Tb11.v5.0346	#N/A	BarP protein, putative	Membrane.protein	460.8	0.6137	2.1e-07	0	0	1	0			0	0	0
Tb11.v5.0369.1-p1-CDS1	Tb11.v5.0369	#N/A	hypothetical protein, conserved	ZUnknown	126.2	0.8619	1.97e-05	0	0	1	0			0	0	0
Tb11.v5.0411.1-p1-CDS1	Tb11.v5.0411	#N/A	peptidylprolyl isomerase-like protein, putative	Chaperone	3844.1	0.823	2.36e-25	0	0	1	0			0	0	0
Tb11.v5.0432.1-p1-CDS1	Tb11.v5.0432	#N/A	calpain-like cysteine peptidase, putative	Protease	5811.7	0.7009	1.88e-31	0	0	1	0			0	0	0
Tb11.v5.0509.1-p1-CDS1	Tb11.v5.0509	#N/A	hypothetical protein, conserved	ZUnknown	461.6	0.6788	1.86e-09	0	0	1	0			0	0	0
Tb11.v5.0582.1-p1-CDS1	Tb11.v5.0582	#N/A	hypothetical protein, conserved	ZUnknown	420.7	0.6689	6.51e-07	0	0	1	0			0	0	0
Tb11.v5.0718.1-p1-CDS1	Tb11.v5.0718	#N/A	Protein kinase	Protein.kinase	2766.1	0.6617	9.39e-20	0	0	1	0			0	0	0
Tb11.v5.0730.1-p1-CDS1	Tb11.v5.0730	#N/A	PUF4 pumillio RNA binding protein 4, putative	RNA.binding	528.3	0.6427	2.51e-09	0	0	1	0			0	0	0
Tb11.v5.0767.1-p1-CDS1	Tb11.v5.0767	#N/A	60S ribosomal protein L40-ubiquitin	RNA.binding	2101.6	0.6612	1.76e-22	0	0	1	0			0	0	0
Tb11.v5.0771.1-p1-CDS1	Tb11.v5.0771	#N/A	hypothetical protein, conserved	ZUnknown	168.7	0.6239	0.000328	0	0	1	0			0	0	0
Tb11.v5.0802.1-p1-CDS1	Tb11.v5.0802	#N/A	hypothetical protein, conserved	ZUnknown	477.3	0.8883	3.07e-15	0	0	1	0			0	0	0
Tb2.NT.3	Tb2.NT.3	#N/A	Noncoding RNA, putative	ncRNA	91.9	0.6947	0.00297	0	0	1	0			0	0	0
Tb8.NT.18	Tb8.NT.18	#N/A	Noncoding RNA, putative	ncRNA	1275	0.7051	2.3e-13	0	0	1	0			0	0	0
Tb8.NT.41	Tb8.NT.41	#N/A	Noncoding RNA, putative	ncRNA	80	0.6277	0.0148	0	0	1	0			0	0	0
Tb927.1.520	Tb927.1.520	Tb927.01.0520	VSG pseudogene,variant surface glycoprotein, fragment	VSG	50.9	-1.2021	6.48e-05	0	1	0	1	-0.0944	0.999265	0	0	0
Tb927.1.800	Tb927.1.800	Tb927.01.0800	hypothetical protein, unlikely	Unlikely	188.5	-1.1619	8.43e-13	0	1	0	1	-0.1698	0.999265	0	0	0
Tb927.1.2100	Tb927.1.2100	Tb927.01.2100	calpain-like cysteine peptidase, putative,cysteine peptidase, Clan CA, family C2, putative	Protease	5353.7	-2.0142	5.96e-107	0	1	0	1	-1.0732	9.14428e-06	0	1	1
Tb927.1.2200	Tb927.1.2200	Tb927.01.2200	ZC3H4	RNA.binding	308.7	-2.297	3.36e-57	0	1	0	1	-0.4118	0.832139	0	0	1
Tb927.1.2210	Tb927.1.2210	Tb927.01.2210	nucleosome assembly protein (NAP), putative	ZUnknown	1739.7	-1.1057	1e-36	0	1	0	1	-0.8911	3.83157e-07	0	0	1
Tb927.1.2310	Tb927.1.2310	Tb927.01.2310	hypothetical protein	ZUnknown	905.2	-1.5753	3.89e-34	0	1	0	1	-1.0316	0.195934	0	0	1
Tb927.1.2420	Tb927.1.2420	Tb927.01.2420	hypothetical protein	ZUnknown	172.8	-1.5035	8.28e-20	0	1	0	1	-1.1328	9.59966e-05	0	1	1
Tb927.1.2600	Tb927.1.2600	Tb927.01.2600	PUF9	RNA.binding	3178.1	-1.3879	2.96e-92	0	1	0	1	0.621	0.460656	0	0	1
Tb927.1.2760	Tb927.1.2760	Tb927.01.2760	hypothetical protein	ZUnknown	441.4	-1.607	1.46e-41	0	1	0	1	-1.2505	5.28522e-09	0	1	1
Tb927.1.3360	Tb927.1.3360	Tb927.01.3360	hypothetical protein, unlikely	Unlikely	36	-1.4593	5.27e-05	0	1	0	1	-1.7673	0.000521133	0	1	0
Tb927.2.960	Tb927.2.960	Tb927.02.0960	hypothetical protein	ZUnknown	58.7	-2.298	4.81e-13	0	1	0	1	-1.7688	0.0152621	0	1	0
Tb927.2.1380	Tb927.2.1380	Tb927.02.1380	leucine-rich repeat protein (LRRP)	LRRP	43.9	-2.9731	1.04e-14	0	1	0	1	-0.6032	0.622587	0	0	1
Tb927.2.3320	Tb927.2.3320	Tb927.02.3320	65 kDa invariant surface glycoprotein (ISG65)	Membrane.protein	1229.7	-1.1637	9.79e-19	0	1	0	1	-0.8872	0.85596	0	0	0
Tb927.2.3330	Tb927.2.3330	Tb927.02.3330	hypothetical protein	ZUnknown	74.6	-1.4104	1.31e-08	0	1	0	1	-0.9403	0.963619	0	0	1
Tb927.2.3340	Tb927.2.3340	Tb927.02.3340	hypothetical protein	ZUnknown	286.2	-3.07	7.17e-87	0	1	0	1	-2.1777	1.96237e-08	0	1	1
Tb927.2.5310	Tb927.2.5310	Tb927.02.5310	hypothetical protein, conserved, signal pep, lectin-like domain	ZUnknown	354.5	-1.1201	4.84e-20	0	1	0	1	-1.2121	0.00245939	0	1	0
Tb927.2.5320	Tb927.2.5320	Tb927.02.5320	hypothetical protein, conserved, signal pep, lectin-like domain	ZUnknown	181.6	-1.2931	9.34e-15	0	1	0	1	-1.1852	0.0832504	0	0	0
Tb927.2.5330	Tb927.2.5330	Tb927.02.5330	hypothetical protein, conserved, signal pep, lectin-like domain	ZUnknown	134	-1.0921	1.01e-08	0	1	0	1	-1.4685	0.0325	0	1	0
Tb927.2.5340	Tb927.2.5340	Tb927.02.5340	hypothetical protein, conserved, signal pep, lectin-like domain	ZUnknown	128.4	-1.2053	5.53e-09	0	1	0	1	-1.4725	0.0199003	0	1	0
Tb927.2.5350	Tb927.2.5350	Tb927.02.5350	hypothetical protein, conserved, signal pep, lectin-like domain	ZUnknown	137.6	-1.4089	8.79e-15	0	1	0	1	-1.0968	0.000381628	0	1	0
Tb927.2.5384	Tb927.2.5384	Tb927.02.5384	retrotransposon hot spot protein (RHS, pseudogene), putative	RHS	253.3	-1.5559	9.97e-25	0	1	0	1	0.1752	0.999265	0	0	1
Tb927.2.6150	Tb927.2.6150	Tb927.02.6150	adenosine transporter 2 (TbNT2/927)	Nucleotides	1350.3	-1.2228	1.98e-49	0	1	0	1	0.2576	0.999265	0	0	0
Tb927.2.6200	Tb927.2.6200	Tb927.02.6200	adenosine transporter 2, putative (TbNT3)	Nucleotides	490.2	-1.8822	9.05e-61	0	1	0	1	-0.7213	0.999265	0	0	0
Tb927.2.6220	Tb927.2.6220	Tb927.02.6220	adenosine transporter 2, putative (TbNT4)	Nucleotides	460.4	-2.5635	4.44e-107	0	1	0	1	-1.639	0.397082	0	0	0
Tb927.2.6240	Tb927.2.6240	Tb927.02.6240	adenosine transporter 2 (TbNT5)	Nucleotides	123.5	-1.7085	9.64e-19	0	1	0	1	-1.3663	0.350386	0	0	0
Tb927.2.6280	Tb927.2.6280	Tb927.02.6280	adenosine transporter 2, putative (TbNT7)	Nucleotides	104.4	-1.5008	4.21e-13	0	1	0	1			0	0	0
Tb927.2.6320	Tb927.2.6320	Tb927.02.6320	adenosine transporter 2, putative (TbNT6)	Nucleotides	369.7	-3.8383	2.44e-125	0	1	0	1	-0.9072	0.71846	0	0	0
Tb927.3.530	Tb927.3.530	Tb927.03.0530	ESAG11 pseudogene	faint cytoplasm	6.8	-3.2408	0.00264	0	1	0	1			0	0	0
Tb927.3.1470	Tb927.3.1470	Tb927.03.1470	variant surface glycoprotein (VSG)-related, putative	VSG	1900.1	-1.7039	8.44e-75	0	1	0	1	0.4597	0.999265	0	0	0
Tb927.3.1490	Tb927.3.1490	Tb927.03.1490	leucine-rich repeat protein (LRRP)	LRRP	448.1	-1.2759	7.39e-28	0	1	0	1	-0.2826	0.999265	0	0	1
Tb927.3.1520	Tb927.3.1520	Tb927.03.1520	variant surface glycoprotein (VSG)-related, putative	VSG	1788.6	-1.7711	7.44e-71	0	1	0	1	0.4597	0.999265	0	0	0
Tb927.3.3100	Tb927.3.3100	Tb927.03.3100	peptidyl-prolyl cis-trans isomerase NIMA-interacting 4, putative	Chaperone	508.4	-1.3751	8.9e-27	0	1	0	1	-1.2515	7.55219e-17	0	1	1
Tb927.3.5660	Tb927.3.5660	Tb927.03.5660	GnT11 UDP-GlcNAc:α3-D-mannoside β1–2-N-acetylglucosaminyltransferase I	Glycans	986.8	-1.1933	2.36e-39	0	1	0	1	-1.1844	0.065949	0	0	1
Tb927.4.2310	Tb927.4.2310	Tb927.04.2310	asparaginyl-tRNA synthetase, putative	Translation.tRNA	6115	-1.0461	4.57e-44	0	1	0	1	-0.3102	0.78166	0	0	1
Tb927.4.2810	Tb927.4.2810	Tb927.04.2810	hypothetical protein	ZUnknown	1161	-1.1489	5.13e-36	0	1	0	1	-0.1163	0.999265	0	0	1
Tb927.4.3770	Tb927.4.3770	Tb927.04.3770	protein kinase, putative	Protein.kinase	2555	-1.4478	3.57e-71	0	1	0	1	0.9794	0.0582643	0	0	1
Tb927.4.3840	Tb927.4.3840	Tb927.04.3840	nucleolar protein, putative	rRNA.tRNA.process	1556.9	-1.1079	2.1e-42	0	1	0	1	-0.5592	0.104874	0	0	1
Tb927.4.3850	Tb927.4.3850	Tb927.04.3850	WDR12	rRNA.tRNA.process	1076	-1.0761	8.41e-41	0	1	0	1	-0.6482	0.0247822	0	0	1
Tb927.4.3930	Tb927.4.3930	Tb927.04.3930	amino acid transporter, putative	Amino.acid.transport	2574.7	-1.0494	5.51e-54	0	1	0	1	-0.7958	7.20691e-05	0	0	1
Tb927.4.5420	Tb927.4.5420	Tb927.04.5420	variant surface glycoprotein (VSG, atypical), putative	VSG	4.3	-2.617	0.0453	0	1	0	1			0	0	0
Tb927.4.5440	Tb927.4.5440	Tb927.04.5440	hypothetical protein	ZUnknown	6.2	-3.3949	0.00226	0	1	0	1			0	0	1
Tb927.5.120	Tb927.5.120	Tb927.05.0120	ESAG9, putative	ESAG	321.7	-2.0364	9.57e-39	0	1	0	1	-1.5659	0.77446	0	0	1
Tb927.5.270	Tb927.5.270	Tb927.05.0270	VSG pseudogene	VSG	43.2	-1.9252	2.23e-08	0	1	0	1			0	0	0
Tb927.5.1400	Tb927.5.1400	Tb927.05.1400	hypothetical protein	ZUnknown	187.4	-1.0405	7.16e-10	0	1	0	1			0	0	0
Tb927.5.1430	Tb927.5.1430	Tb927.05.1430	64 kDa invariant surface glycoprotein (ISG64)	Membrane.protein	599.8	-1.01	1.44e-17	0	1	0	1			0	0	0
Tb927.5.2000	Tb927.5.2000	Tb927.05.2000	hypothetical protein copurifies with MKT1 & XAC1, one Q8, salivaria & stercoraria only, well translated only in bloodstream forms	ZUnknown	3536.9	-1.0831	5.1e-48	0	1	0	1	1.8085	4.10969e-05	1	0	1
Tb927.5.2010	Tb927.5.2010	Tb927.05.2010	hypothetical protein	ZUnknown	667.4	-1.2357	9.48e-28	0	1	0	1	0.5766	0.38205	0	0	1
Tb927.5.4010	Tb927.5.4010	Tb927.05.4010	ESP4 Enriched in surface-labeled proteome	Membrane.protein	692.3	-2.238	3.11e-110	0	1	0	1	-1.0961	0.0674178	0	0	1
Tb927.5.4560	Tb927.5.4560	Tb927.05.4560	guanine deaminase, putative	Nucleotides	707.3	-1.5022	5.43e-48	0	1	0	1	-0.6674	0.0167907	0	0	1
Tb927.5.4600	Tb927.5.4600	Tb927.05.4600	ESAG3, putative	ESAG	317.9	-1.1662	3.73e-19	0	1	0	1	-0.1637	0.999265	0	0	0
Tb927.6.1790	Tb927.6.1790	Tb927.06.1790	hypothetical protein	ZUnknown	1031	-1.2441	6.45e-05	0	1	0	1	0.098	0.999265	0	0	1
Tb927.6.3480	Tb927.6.3480	Tb927.06.3480	importin beta subunit beta-4	RNA.binding	1064.2	-1.1489	4.92e-31	0	1	0	1	0.1926	0.999265	0	0	1
Tb927.6.4280	Tb927.6.4280	Tb927.06.4280	glyceraldehyde 3-phosphate dehydrogenase, glycosomal (GAPDH)	Glucose.glycerol	27006.8	-1.2766	5.01e-62	0	1	0	1	-0.5258	0.22786	0	0	1
Tb927.6.4300	Tb927.6.4300	Tb927.06.4300	glyceraldehyde 3-phosphate dehydrogenase, glycosomal (GAPDH)	Glucose.glycerol	27060.6	-1.2922	6.99e-63	0	1	0	1	-0.6541	0.133205	0	0	0
Tb927.7.160	Tb927.7.160	Tb927.07.0160	ESAG2 pseudogene	ESAG.pseudo	252.8	-1.1321	7.72e-15	0	1	0	1	-0.5716	0.999265	0	0	0
Tb927.7.170	Tb927.7.170	Tb927.07.0170	ESAG9, putative	ESAG	727.7	-1.1142	2.88e-29	0	1	0	1	-1.4125	0.526014	0	0	1
Tb927.7.1950	Tb927.7.1950	Tb927.07.1950	retrotransposon hot spot protein 7 (RHS7), putative	RHS	23.8	-2.2319	2.23e-06	0	1	0	1	2.8943	0.999265	0	0	0
Tb927.7.1960	Tb927.7.1960	Tb927.07.1960	retrotransposon hot spot protein 7 (RHS7), putative	RHS	31.4	-1.7787	1.23e-05	0	1	0	1	-0.5674	0.999265	0	0	0
Tb927.7.1970	Tb927.7.1970	Tb927.07.1970	retrotransposon hot spot protein 7 (RHS7), putative	RHS	27.5	-2.0146	4.36e-06	0	1	0	1	-3.0094	0.958663	0	0	0
Tb927.7.1980	Tb927.7.1980	Tb927.07.1980	retrotransposon hot spot protein 7 (RHS7), putative	RHS	21.6	-2.5351	5.71e-07	0	1	0	1	-0.2546	0.999265	0	0	0
Tb927.7.1990	Tb927.7.1990	Tb927.07.1990	retrotransposon hot spot protein (RHS7, pseudogene), putative	RHS	29.8	-1.7158	4.55e-05	0	1	0	1	-1.9867	0.887363	0	0	0
Tb927.7.2000	Tb927.7.2000	Tb927.07.2000	retrotransposon hot spot protein 7 (RHS7), putative	RHS	41.1	-2.3934	3.77e-11	0	1	0	1	-0.2807	0.999265	0	0	0
Tb927.7.2010	Tb927.7.2010	Tb927.07.2010	retrotransposon hot spot protein 7 (RHS7), putative	RHS	41.7	-2.6025	9.59e-13	0	1	0	1	-1.6958	0.805813	0	0	0
Tb927.7.2020	Tb927.7.2020	Tb927.07.2020	retrotransposon hot spot protein 7 (RHS7), putative	RHS	33.9	-2.3734	2.65e-09	0	1	0	1	-0.5661	0.999265	0	0	0
Tb927.7.2030	Tb927.7.2030	Tb927.07.2030	retrotransposon hot spot protein 7 (RHS7), putative	RHS	161.5	-2.034	2.05e-28	0	1	0	1	-2.0749	0.00278225	0	1	0
Tb927.7.2100	Tb927.7.2100	Tb927.07.2100	GMP synthase	Nucleotides	818	-1.0814	5.96e-34	0	1	0	1	-0.878	0.0795544	0	0	1
Tb927.7.2140	Tb927.7.2140	Tb927.07.2140	ZC3H18	RNA.binding	1239.2	-1.01	1.3e-38	0	1	0	1	-0.3408	0.95615	0	0	1
Tb927.7.4570	Tb927.7.4570	Tb927.07.4570	inosine-guanine nucleoside hydrolase (IG-NH)	Nucleotides	1660.6	-1.3302	3.67e-52	0	1	0	1	-0.6854	0.418788	0	0	1
Tb927.7.6530	Tb927.7.6530	Tb927.07.6530	VSG pseudogene,variant surface glycoprotein, degenerate	VSG	5.4	-2.2239	0.0404	0	1	0	1	0.2041	0.999265	0	0	0
Tb927.7.6540	Tb927.7.6540	Tb927.07.6540	variant surface glycoprotein (VSG, atypical), putative	VSG	12.3	-1.6648	0.011	0	1	0	1	-1.4065	0.947458	0	0	0
Tb927.8.520	Tb927.8.520	Tb927.08.0520	hypothetical protein	ZUnknown	44.4	-1.3983	0.000153	0	1	0	1	1.2948	0.000592327	1	0	0
Tb927.8.650	Tb927.8.650	Tb927.08.0650	cation-transporting ATPase, putative	Ions	7696.2	-1.0044	1.35e-42	0	1	0	1	-0.6219	0.393321	0	0	1
Tb927.8.730	Tb927.8.730	Tb927.08.0730	nucleolar RNA-binding protein, putative	rRNA.tRNA.process	3120.8	-1.0931	1.03e-24	0	1	0	1	-0.7783	0.0458595	0	0	1
Tb927.8.760	Tb927.8.760	Tb927.08.0760	nucleolar RNA-binding protein (Nopp44/46)	rRNA.tRNA.process	2491.4	-1.0677	7.27e-07	0	1	0	1	-0.729	0.044017	0	0	0
Tb927.8.1665	Tb927.8.1665	Tb927.08.1665	hypothetical protein	ZUnknown	147.5	-1.226	2.22e-12	0	1	0	1	-1.347	0.0167658	0	1	1
Tb927.8.3370	Tb927.8.3370	Tb927.08.3370	Ran guanine nucleotide release factor homologue	Nuclear.transport	320.2	-1.0632	4.24e-15	0	1	0	1	-0.5351	0.407561	0	0	1
Tb927.8.3420	Tb927.8.3420	Tb927.08.3420	hypothetical protein, conserved	ZUnknown	438.6	-1.8732	5.6e-59	0	1	0	1	-0.4397	0.0689006	0	0	1
Tb927.8.3460	Tb927.8.3460	Tb927.08.3460	Ring finger domain containing protein, putative	ZUnknown	1953.5	-1.1415	1.12e-52	0	1	0	1	-0.0877	0.999265	0	0	1
Tb927.8.3480	Tb927.8.3480	Tb927.08.3480	hypothetical protein, conserved	ZUnknown	1170.1	-1.0018	9.07e-34	0	1	0	1	-0.619	5.99271e-05	0	0	1
Tb927.8.5440	Tb927.8.5440	Tb927.08.5440	flagellar calcium-binding protein,24 kDa calflagin, (Tb-24)	Cytoskeleton	1505.5	-1.1418	4.1e-39	0	1	0	1	0.1719	0.999265	0	0	0
Tb927.8.5460	Tb927.8.5460	Tb927.08.5460	flagellar calcium-binding protein,44 kDa calflagin, (Tb-44)	Cytoskeleton	2473.4	-1.1115	3.72e-56	0	1	0	1	0.4973	0.488805	0	0	0
Tb927.8.5465	Tb927.8.5465	Tb927.08.5465	flagellar calcium-binding protein,24 kDa calflagin, (Tb-24)	Cytoskeleton	1536.8	-1.1364	6.26e-45	0	1	0	1	0.1687	0.999265	0	0	0
Tb927.8.5470	Tb927.8.5470	Tb927.08.5470	flagellar calcium-binding protein,17 kDa calflagin, (Tb-17)	Cytoskeleton	1343.3	-1.0084	7.15e-30	0	1	0	1	-0.3726	0.800231	0	0	0
Tb927.8.7310	Tb927.8.7310	Tb927.08.7310	hypothetical protein	ZUnknown	31.7	-1.0166	0.0148	0	1	0	1			0	0	0
Tb927.8.7780	Tb927.8.7780	Tb927.08.7780	hypothetical protein, conserved	ZUnknown	2046.7	-1.4937	5.45e-70	0	1	0	1	0.1581	0.999265	0	0	1
Tb927.8.7790	Tb927.8.7790	Tb927.08.7790	zinc finger domain, LSD1 subclass, putative	Zinc.finger	837.5	-1.027	4.71e-29	0	1	0	1	0.9918	0.0011419	0	0	1
Tb927.8.7800	Tb927.8.7800	Tb927.08.7800	hypothetical protein, conserved	ZUnknown	1851.4	-1.4735	2.08e-48	0	1	0	1	-0.1262	0.999265	0	0	1
Tb927.8.7810	Tb927.8.7810	Tb927.08.7810	hypothetical protein, conserved	ZUnknown	235.6	-1.1715	3.52e-16	0	1	0	1	-0.0021	0.999265	0	0	1
Tb927.8.7830	Tb927.8.7830	Tb927.08.7830	hypothetical protein, conserved	ZUnknown	1972.9	-1.1565	4.63e-49	0	1	0	1	0.3712	0.831285	0	0	1
Tb927.8.7850	Tb927.8.7850	Tb927.08.7850	hypothetical protein, conserved	ZUnknown	2278.8	-1.0931	2.12e-25	0	1	0	1	0.8803	0.205298	0	0	1
Tb927.8.7860	Tb927.8.7860	Tb927.08.7860	GRESAG 4, putative receptor-type adenylate cyclase	GRESAG	744.4	-1.0078	1.99e-24	0	1	0	1	0.0229	0.999265	0	0	0
Tb927.8.7870	Tb927.8.7870	Tb927.08.7870	GRESAG 4, putative receptor-type adenylate cyclase	GRESAG	953.6	-1.0958	2.71e-35	0	1	0	1	-0.1278	0.999265	0	0	0
Tb927.8.7890	Tb927.8.7890	Tb927.08.7890	GRESAG 4, putative receptor-type adenylate cyclase	GRESAG	649.2	-1.0073	3.96e-20	0	1	0	1	-0.2387	0.999265	0	0	0
Tb927.8.7900	Tb927.8.7900	Tb927.08.7900	GRESAG 4, putative receptor-type adenylate cyclase	GRESAG	555.4	-1.0372	1.49e-21	0	1	0	1	-0.1718	0.982676	0	0	0
Tb927.8.7910	Tb927.8.7910	Tb927.08.7910	GRESAG 4 pseudogene	GRESAG	726.9	-1.0069	3.79e-28	0	1	0	1	0.3249	0.376893	0	0	0
Tb927.8.7920	Tb927.8.7920	Tb927.08.7920	GRESAG 4, putative receptor-type adenylate cyclase	GRESAG	637.1	-1.193	1.38e-33	0	1	0	1	-0.2954	0.999265	0	0	0
Tb927.8.7930	Tb927.8.7930	Tb927.08.7930	GRESAG 4, putative receptor-type adenylate cyclase	GRESAG	842.8	-1.0461	3.01e-29	0	1	0	1	0.1707	0.912009	0	0	0
Tb927.8.7940	Tb927.8.7940	Tb927.08.7940	GRESAG 4, putative receptor-type adenylate cyclase	GRESAG	1835.3	-1.237	3.85e-49	0	1	0	1	-0.0399	0.999265	0	0	0
Tb927.8.7950	Tb927.8.7950	Tb927.08.7950	Flagellar Member 4 (FLAM4)	Cytoskeleton	5605.6	-1.1183	5.66e-46	0	1	0	1	-0.1225	0.999265	0	0	1
Tb927.8.7960	Tb927.8.7960	Tb927.08.7960	hypothetical protein	ZUnknown	963.2	-1.1566	2.15e-37	0	1	0	1	0.894	0.0395654	0	0	1
Tb927.8.8000	Tb927.8.8000	Tb927.08.8000	hypothetical protein, conserved	ZUnknown	2348.7	-1.1773	1.74e-49	0	1	0	1	0.1921	0.907775	0	0	1
Tb927.8.8010	Tb927.8.8010	Tb927.08.8010	hypothetical protein, conserved	ZUnknown	921.2	-1.1552	2.79e-39	0	1	0	1	-0.119	0.95615	0	0	1
Tb927.8.8040	Tb927.8.8040	Tb927.08.8040	kinetoplastid-specific phospho-protein phosphatase, putative	Protein.phosphatase	506.2	-1.0549	1.04e-23	0	1	0	1	-0.2328	0.825061	0	0	1
Tb927.8.8050	Tb927.8.8050	Tb927.08.8050	TbNup75 Connect inner-outer, FG, symmetrical, paralogue pf Nup64	Nuclear.transport	2046.7	-1.1217	1.17e-35	0	1	0	1	-0.1263	0.999265	0	0	1
Tb927.8.8060	Tb927.8.8060	Tb927.08.8060	UDP-Gal or UDP-GlcNAc-dependent glycosyltransferase pseudogene	Pseudogene	133.6	-1.2926	2.08e-10	0	1	0	1	-0.2884	0.225113	0	0	0
Tb927.8.8070	Tb927.8.8070	Tb927.08.8070	conserved protein	ZUnknown	1374.8	-1.0759	7.96e-33	0	1	0	1	-0.0172	0.999265	0	0	0
Tb927.8.8080	Tb927.8.8080	Tb927.08.8080	UDP-Gal or UDP-GlcNAc-dependent glycosyltransferase pseudogene	Pseudogene	138.4	-1.2796	1.61e-12	0	1	0	1	-0.4091	0.979719	0	0	0
Tb927.8.8090	Tb927.8.8090	Tb927.08.8090	UDP-Gal or UDP-GlcNAc-dependent glycosyltransferase, putative	Glycans	553.9	-1.2081	4.09e-29	0	1	0	1	-0.3733	0.34297	0	0	0
Tb927.8.8100	Tb927.8.8100	Tb927.08.8100	UDP-Gal or UDP-GlcNAc-dependent glycosyltransferase, putative	Glycans	467.6	-1.2626	2.05e-28	0	1	0	1	-0.2409	0.746499	0	0	0
Tb927.8.8110	Tb927.8.8110	Tb927.08.8110	hypothetical protein, conserved	ZUnknown	1158.8	-1.0215	6.36e-35	0	1	0	1	0.118	0.999265	0	0	0
Tb927.8.8170	Tb927.8.8170	Tb927.08.8170	REMC5A mitochondrial RNA binding protein 1, putative (MRB8170)	Mito.RNA	2200.6	-1.0105	1.12e-44	0	1	0	1	-0.1827	0.966631	0	0	0
Tb927.8.8270	Tb927.8.8270	Tb927.08.8270	hypothetical protein, conserved	ZUnknown	1559.8	-1.4937	9.87e-86	0	1	0	1	-0.3603	0.337446	0	0	1
Tb927.8.8290	Tb927.8.8290	Tb927.08.8290	AAT10 Ornithine transporter	Amino.acid.transport	2625	-1.4763	4.53e-76	0	1	0	1	0.1499	0.999265	0	0	1
Tb927.8.8330	Tb927.8.8330	Tb927.08.8330	calpain, putative,cysteine peptidase, putative	Protease	11145.2	-1.4063	1.21e-71	0	1	0	1	0.1762	0.999265	0	0	1
Tb927.8.8340	Tb927.8.8340	Tb927.08.8340	CRAL/TRIO domain containing protein, putative	ZUnknown	1410.3	-1.4923	1.93e-63	0	1	0	1	-0.1492	0.999265	0	0	1
Tb927.8.8360	Tb927.8.8360	Tb927.08.8360	GRESAG 4, putative receptor-type adenylate cyclase	GRESAG	452.1	-1.3359	2.83e-30	0	1	0	1	0.5192	0.773808	0	0	1
Tb927.9.1280	Tb927.9.1280	Tb927.09.01280	variant surface glycoprotein (VSG, atypical), putative	VSG	40	-2.2461	3.59e-10	0	1	0	1	-0.4417	0.999265	0	0	0
Tb927.9.670	Tb927.9.670	Tb927.09.06700	hypothetical protein	ZUnknown	145.3	-1.0432	1.51e-07	0	1	0	1			0	0	0
Tb927.9.7290	Tb927.9.7290	Tb927.09.07290	variant surface glycoprotein (VSG)-related, putative	VSG	154.5	-2.0927	5.89e-29	0	1	0	1	2.0457	0.581079	0	0	0
Tb927.9.7310	Tb927.9.7310	Tb927.09.07310	VSG pseudogene	VSG	21.6	-1.2533	0.0161	0	1	0	1			0	0	0
Tb927.9.7340	Tb927.9.7340	Tb927.09.07340	ESAG9, putative	ESAG	30.3	-2.301	2.57e-08	0	1	0	1			0	0	1
Tb927.9.7670	Tb927.9.7670	Tb927.09.07670	hypothetical protein, conserved, no clear matches	ZUnknown	975.4	-1.1242	1.03e-35	0	1	0	1	-0.8354	0.00534105	0	0	1
Tb927.9.7770	Tb927.9.7770	Tb927.09.07770	spermidine synthase (SpSyn)	Redox	2022.7	-1.3825	2.03e-82	0	1	0	1	-0.8619	1.60578e-05	0	0	1
Tb927.9.7800	Tb927.9.7800	Tb927.09.07800	hypothetical protein, conserved	ZUnknown	529.3	-1.0934	1.52e-27	0	1	0	1	-0.6374	2.82039e-05	0	0	1
Tb927.9.8950	Tb927.9.8950	Tb927.09.08950	CAAX prenyl protease 1, putative,metallo- peptidase, Clan M- Family M48	Protease	6150.2	-1.1385	1.22e-82	0	1	0	1	-1.0265	3.92602e-05	0	1	1
Tb927.9.9060	Tb927.9.9060	Tb927.09.09060	LSM12	RNA.degradation	1578.6	-1.0658	6.04e-45	0	1	0	1	-1.036	4.56404e-06	0	1	1
Tb927.9.9100	Tb927.9.9100	Tb927.09.09100	hypothetical protein, conserved	ZUnknown	1367.7	-1.1414	1.54e-41	0	1	0	1	-0.8235	0.00502024	0	0	1
Tb927.9.9210	Tb927.9.9210	Tb927.09.09210	60S ribosomal protein L37	Ribosome	1760.1	-1.1811	1.6e-26	0	1	0	1	-1.1911	0.0463407	0	1	1
Tb927.9.11600	Tb927.9.11600	Tb927.09.11600	Gim5B protein,glycosomal membrane protein (gim5B)	Glycosome	3148.3	-1.0125	9.63e-27	0	1	0	1	-0.1749	0.999265	0	0	0
Tb927.9.12550	Tb927.9.12550	Tb927.09.12550	glycerol kinase, glycosomal (glk1)	Glucose.glycerol	4646	-1.1605	5.71e-45	0	1	0	1	-1.2083	0.00175905	0	1	1
Tb927.9.12570	Tb927.9.12570	Tb927.09.12570	glycerol kinase, glycosomal (glk1)	Glucose.glycerol	4970.2	-1.1863	6.99e-52	0	1	0	1	-0.0644	0.999265	0	0	0
Tb927.9.12590	Tb927.9.12590	Tb927.09.12590	glycerol kinase, glycosomal (glk1)	Glucose.glycerol	4628.2	-1.1414	1.6e-39	0	1	0	1	-0.8904	0.999265	0	0	0
Tb927.9.12610	Tb927.9.12610	Tb927.09.12610	glycerol kinase, glycosomal (glk1)	Glucose.glycerol	5002.3	-1.1688	6.78e-45	0	1	0	1	-1.6104	3.87416e-05	0	1	0
Tb927.9.12630	Tb927.9.12630	Tb927.09.12630	glycerol kinase, glycosomal (glk1)	Glucose.glycerol	5347.4	-1.173	9.55e-54	0	1	0	1	0.4164	0.681195	0	0	0
Tb927.9.15700	Tb927.9.15700	Tb927.09.15700	variant surface glycoprotein (VSG)-related, putative	VSG	15.9	-1.6163	0.0126	0	1	0	1	-1.7381	0.26476	0	0	0
Tb927.9.15710	Tb927.9.15710	Tb927.09.15710	variant surface glycoprotein (VSG)-related, putative	VSG	25.8	-1.1669	0.00969	0	1	0	1			0	0	0
Tb927.9.15730	Tb927.9.15730	Tb927.09.15730	variant surface glycoprotein (VSG)-related, putative	VSG	30.1	-1.4294	0.000338	0	1	0	1			0	0	0
Tb927.9.15740	Tb927.9.15740	Tb927.09.15740	hypothetical protein, conserved	ZUnknown	20.2	-1.411	0.00787	0	1	0	1			0	0	0
Tb927.9.15760	Tb927.9.15760	Tb927.09.15760	variant surface glycoprotein (VSG)-related, putative	VSG	15.9	-1.2311	0.0407	0	1	0	1			0	0	0
Tb927.9.15770	Tb927.9.15770	Tb927.09.15770	hypothetical protein, conserved	ZUnknown	26.2	-1.2238	0.00548	0	1	0	1			0	0	0
Tb927.9.16060	Tb927.9.16060	Tb927.09.16060	hypothetical protein	ZUnknown	2.9	-3.3937	0.0396	0	1	0	1			0	0	1
Tb927.10.30	Tb927.10.30	Tb927.10.00030	VSG pseudogene	VSG	254.6	-1.3461	1.5e-19	0	1	0	1			0	0	0
Tb927.10.5700	Tb927.10.5700	Tb927.10.05700	ESP3 Enriched in surface proteome, predicted GPI anchor	Membrane.protein	205.7	-1.0386	2.25e-09	0	1	0	1	-0.7425	0.999265	0	0	0
Tb927.10.14140	Tb927.10.14140	Tb927.10.14140	pyruvate kinase 1 (PYK1)	Glucose.glycerol	24841.8	-1.0859	6.47e-71	0	1	0	1	-0.2188	0.915024	0	0	1
Tb927.10.14160	Tb927.10.14160	Tb927.10.14160	Aquaglyceroporin 3	Transporter	2706.5	-1.4172	4.63e-96	0	1	0	1	0.4141	0.979719	0	0	1
Tb927.10.15910	Tb927.10.15910	Tb927.10.15910	glycerol uptake protein, putative	Glucose.glycerol	1197.4	-1.0328	3.49e-42	0	1	0	1	0.1099	0.999265	0	0	1
Tb927.11.5940	Tb927.11.5940	Tb927.11.005940	GRESAG 4, putative receptor-type adenylate cyclase	GRESAG	1539.5	-1.3653	1.85e-63	0	1	0	1	-2.1506	1.34718e-09	0	1	1
Tb927.11.1360	Tb927.11.1360	Tb927.11.01360	zinc-finger of a C2HC-type, putative	Zinc.finger	1270.8	-1.0767	2.18e-42	0	1	0	1	-0.2827	0.622587	0	0	1
Tb927.11.1420	Tb927.11.1420	Tb927.11.01420	hypothetical protein, conserved	ZUnknown	3540.4	-1.4759	1.57e-124	0	1	0	1	-0.2609	0.905028	0	0	1
Tb927.11.1430	Tb927.11.1430	Tb927.11.01430	CMF2, T. brucei components of motile flagella (TbCMF2)	Cytoskeleton	5579.3	-1.1617	1.46e-60	0	1	0	1	-0.2268	0.999265	0	0	1
Tb927.11.1450	Tb927.11.1450	Tb927.11.01450	2-oxoglutarate dehydrogenase E1 component, putative	Mito.citric.acid.cycle	8497.7	-1.0246	3.12e-53	0	1	0	1	-0.3074	0.939722	0	0	1
Tb927.11.1500	Tb927.11.1500	Tb927.11.01500	leucine-rich repeat protein (LRRP)	LRRP	424.6	-1.6664	3.37e-46	0	1	0	1	0.1077	0.999265	0	0	0
Tb927.11.1510.1-p1-CDS1	Tb927.11.1510	Tb927.11.01510	leucine rich repeat protein, putative	LRRP	233.3	-1.2592	1.06e-18	0	1	0	1	0.1577	0.999265	0	0	0
Tb927.11.4060	Tb927.11.4060	Tb927.11.04060	leucine-rich repeat protein (LRRP)	LRRP	167.2	-2.1322	4.27e-31	0	1	0	1	-0.724	0.999265	0	0	1
Tb927.11.4070	Tb927.11.4070	Tb927.11.04070	hypothetical protein	ZUnknown	71.8	-2.4485	1.29e-19	0	1	0	1	-0.2169	0.999265	0	0	1
Tb927.11.4090.1-p1-CDS1	Tb927.11.4090	Tb927.11.04090	hypothetical protein	ZUnknown	24.4	-1.5695	0.000475	0	1	0	1			0	0	0
Tb927.11.4100.1-p1-CDS1	Tb927.11.4100	Tb927.11.04100	variant surface glycoprotein (VSG), putative	VSG	613.5	-2.7524	5.17e-110	0	1	0	1	0.2154	0.999265	0	0	0
Tb927.11.4120	Tb927.11.4120	Tb927.11.04120	leucine-rich repeat protein (LRRP)	LRRP	361.6	-1.6531	5.33e-40	0	1	0	1	1.0044	0.0702109	0	0	1
Tb927.11.7380	Tb927.11.7380	Tb927.11.07380	glycerol-3-phosphate dehydrogenase (FAD-dependent), mitochondrial, TAO complex	Glucose.glycerol	8284	-1.14	4.88e-73	0	1	0	1	0.1084	0.999265	0	0	1
Tb927.11.8440.1	Tb927.11.8440	Tb927.11.08440	haloacid dehalogenase-like hydrolase, putative	Enzyme	1551.8	-1.2467	1.16e-61	0	1	0	1	-0.2194	0.999265	0	0	1
Tb927.11.8440.2	Tb927.11.8440	Tb927.11.08440	haloacid dehalogenase-like hydrolase, putative	Enzyme	1555.2	-1.2456	8.23e-62	0	1	0	1	-0.2194	0.999265	0	0	1
Tb927.11.10340	Tb927.11.10340	Tb927.11.10340	Phosphoglycerate mutase-like	Glucose.glycerol	2124.9	-1.093	1.24e-42	0	1	0	1	0.0527	0.999265	0	0	1
Tb927.11.14090	Tb927.11.14090	Tb927.11.14090	DRBD18	RNA.binding	4071.2	-2.4158	3.28e-279	0	1	0	1	-2.7026	1.13094e-34	0	1	1
Tb927.11.17180	Tb927.11.17180	Tb927.11.17180	ESAG3 pseudogene	ESAG.pseudo	6.5	-2.3606	0.0171	0	1	0	1			0	0	0
Tb927.11.18670.1-p1-CDS1	Tb927.11.18670	Tb927.11.18670	expression site-associated gene 9 (ESAG9), putative	ESAG	52.4	-1.9196	3.03e-10	0	1	0	1			0	0	0
Tb927.11.18860.1-p1-CDS1	Tb927.11.18860	Tb927.11.18860	variant surface protein (VSG), putative	VSG	3.8	-3.487	0.0184	0	1	0	1			0	0	0
Tb927.11.20380	Tb927.11.20380	Tb927.11.20380	variant surface glycoprotein (VSG, pseudogene), putative	VSG	3.9	-3.4685	0.0192	0	1	0	1			0	0	0
Tb05.5K5.10	Tb05.5K5.10	#N/A	hypothetical protein, conserved	ZUnknown	13.1	-1.4689	0.0206	0	1	0	1			0	0	0
Tb05.5K5.200	Tb05.5K5.200	#N/A	guanine deaminase, putative	Nucleotides	721.8	-1.5374	2.78e-46	0	1	0	1			0	0	0
Tb05.5K5.240	Tb05.5K5.240	#N/A	ESAG3, putative	ESAG	615.4	-1.0703	1.43e-28	0	1	0	1			0	0	0
Tb07.11L3.90	Tb07.11L3.90	#N/A	ZC3H18	RNA.binding	1269.5	-1.0305	2.14e-39	0	1	0	1			0	0	0
Tb09.v4.0012	Tb09.v4.0012	#N/A	variant surface glycoprotein (VSG), putative	VSG	31.5	-1.5177	0.00011	0	1	0	1			0	0	0
Tb09.v4.0065	Tb09.v4.0065	#N/A	ESAG1, putative	ESAG	563.8	-1.524	2.78e-42	0	1	0	1			0	0	0
Tb09.v4.0105	Tb09.v4.0105	#N/A	hypothetical protein	ZUnknown	257.4	-1.0259	9.12e-11	0	1	0	1			0	0	0
Tb09.v4.0111	Tb09.v4.0111	#N/A	VSG pseudogene	VSG	235.3	-1.099	3.57e-14	0	1	0	1			0	0	0
Tb09.v4.0112	Tb09.v4.0112	#N/A	VSG pseudogene	VSG	74.1	-2.2388	3.94e-18	0	1	0	1			0	0	0
Tb09.v4.0113	Tb09.v4.0113	#N/A	variant surface glycoprotein (VSG, atypical), putative	VSG	19.7	-1.4494	0.00553	0	1	0	1			0	0	0
Tb09.v4.0115	Tb09.v4.0115	#N/A	ESAG3 pseudogene	ESAG.pseudo	2.3	-3.7919	0.0426	0	1	0	1			0	0	0
Tb09.v4.0119	Tb09.v4.0119	#N/A	VSG pseudogene	VSG	21.2	-1.3205	0.00927	0	1	0	1			0	0	0
Tb09.v4.0130	Tb09.v4.0130	#N/A	ESAG3 pseudogene	ESAG.pseudo	15.6	-1.834	0.00247	0	1	0	1			0	0	0
Tb1.NT.27	Tb1.NT.27	#N/A	Noncoding RNA, putative	ncRNA	2122.3	-1.0766	6.08e-33	0	1	0	1			0	0	0
Tb10.v4.0214	Tb10.v4.0214	#N/A	ESAG9 pseudogene	ESAG.pseudo	26.5	-1.7076	0.000101	0	1	0	1			0	0	0
Tb10.v4.0216	Tb10.v4.0216	#N/A	VSG pseudogene	VSG	180.6	-1.6942	1.42e-21	0	1	0	1			0	0	0
Tb10.v4.0217	Tb10.v4.0217	#N/A	hypothetical protein	ZUnknown	354.2	-1.3121	5.39e-16	0	1	0	1			0	0	1
Tb10.v4.0258	Tb10.v4.0258	#N/A	hypothetical protein	ZUnknown	11.6	-1.5303	0.0291	0	1	0	1			0	0	0
Tb11.1000	Tb11.1000	#N/A	ESAG9, putative	ESAG	62.4	-2.1553	1.52e-14	0	1	0	1			0	0	0
Tb11.1020	Tb11.1020	#N/A	ESAG1, putative	ESAG	55.2	-2.8471	1.09e-17	0	1	0	1			0	0	0
Tb11.NT.146	Tb11.NT.146	#N/A	Noncoding RNA, putative	ncRNA	28.2	-1.342	0.00353	0	1	0	1			0	0	0
Tb11.NT.54	Tb11.NT.54	#N/A	Noncoding RNA, putative	ncRNA	387.1	-1.4179	1.15e-30	0	1	0	1			0	0	0
Tb11.NT.84	Tb11.NT.84	#N/A	Noncoding RNA, putative	ncRNA	212.2	-1.3339	9.09e-15	0	1	0	1			0	0	0
Tb11.v5.0270.1-p1-CDS1	Tb11.v5.0270	#N/A	nucleoside hydrolase, putative	Enzyme	1901.6	-1.3339	5.7e-62	0	1	0	1			0	0	0
Tb11.v5.0301.1-p1-CDS1	Tb11.v5.0301	#N/A	glycerol uptake protein, putative	Transporter	218	-1.0866	3.74e-11	0	1	0	1			0	0	0
Tb11.v5.0336.1-p1-CDS2	Tb11.v5.0336	#N/A	Variant Surface Glycoprotein, putative	VSG	17.2	-1.2589	0.0268	0	1	0	1			0	0	0
Tb11.v5.0353.1-p1-CDS1	Tb11.v5.0353	#N/A	retrotransposon hot spot (RHS) protein, putative	RHS	38.5	-2.4188	9.35e-10	0	1	0	1			0	0	0
Tb11.v5.0367.1-p1-CDS1	Tb11.v5.0367	#N/A	expression site-associated gene (ESAG) protein, putative	ESAG	723.1	-1.1349	8.08e-35	0	1	0	1			0	0	0
Tb11.v5.0406.1-p1-CDS1	Tb11.v5.0406	#N/A	glycerol uptake protein, putative	Transporter	1053.7	-1.0621	6.61e-41	0	1	0	1			0	0	0
Tb11.v5.0409.1-p1-CDS1	Tb11.v5.0409	#N/A	guanine deaminase, putative	Nucleotides	1396.1	-1.5187	5.11e-48	0	1	0	1			0	0	0
Tb11.v5.0605.1-p1-CDS1	Tb11.v5.0605	#N/A	pyruvate kinase 1, putative	Glucose.glycerol	21136.3	-1.0843	1.07e-61	0	1	0	1			0	0	0
Tb11.v5.0693.1-p1-CDS1	Tb11.v5.0693	#N/A	retrotransposon hot spot (RHS) protein, putative	RHS	36.6	-1.744	1.38e-06	0	1	0	1			0	0	0
Tb11.v5.0714.1-p1-CDS1	Tb11.v5.0714	#N/A	DRBD5	RNA.binding	612.2	-1.137	1.82e-24	0	1	0	1			0	0	0
Tb11.v5.0772.1-p1-CDS1	Tb11.v5.0772	#N/A	expression site-associated gene 9 (ESAG9) protein, putative	ESAG	6.2	-5.1694	0.000385	0	1	0	1			0	0	0
Tb11.v5.0797.1-p1-CDS1	Tb11.v5.0797	#N/A	Flagellar calcium binding protein	Cytoskeleton	1687.2	-1.1573	1.06e-45	0	1	0	1			0	0	0
Tb11.v5.0798.1-p1-CDS1	Tb11.v5.0798	#N/A	flagellar calcium-binding protein	Calcium	1530.5	-1.1208	1.49e-47	0	1	0	1			0	0	0
Tb11.v5.0870.1-p1-CDS1	Tb11.v5.0870	#N/A	variant surface glycoprotein (VSG, atypical), putative	VSG	6.7	-3.7639	0.00125	0	1	0	1			0	0	0
Tb2.NT.41	Tb2.NT.41	#N/A	Noncoding RNA, putative	ncRNA	1123	-1.1068	2.56e-27	0	1	0	1			0	0	0
Tb4.NT.21	Tb4.NT.21	#N/A	Noncoding RNA, putative	ncRNA	48.5	-1.7537	3.85e-08	0	1	0	1			0	0	0
Tb5.NT.46	Tb5.NT.46	#N/A	Noncoding RNA, putative	ncRNA	35.5	-1.2692	0.0005	0	1	0	1			0	0	0
Tb6.NT.65	Tb6.NT.65	#N/A	Noncoding RNA, putative	ncRNA	36.6	-1.6751	7.68e-06	0	1	0	1			0	0	0
Tb6.NT.66	Tb6.NT.66	#N/A	Noncoding RNA, putative	ncRNA	29.1	-1.6797	0.000514	0	1	0	1			0	0	0
Tb7.NT.17	Tb7.NT.17	#N/A	Noncoding RNA, putative	ncRNA	172.4	-1.7324	9.36e-22	0	1	0	1			0	0	0
Tb7.NT.53	Tb7.NT.53	#N/A	Noncoding RNA, putative	ncRNA	86.1	-1.0936	3.68e-06	0	1	0	1			0	0	0
Tb8.NT.129	Tb8.NT.129	#N/A	Noncoding RNA, putative	ncRNA	160.4	-1.5478	1.46e-18	0	1	0	1			0	0	0
Tb8.NT.13	Tb8.NT.13	#N/A	Noncoding RNA, putative	ncRNA	75	-2.3194	1.16e-16	0	1	0	1			0	0	0
Tb8.NT.138	Tb8.NT.138	#N/A	Noncoding RNA, putative	ncRNA	41.7	-2.0043	8.71e-08	0	1	0	1			0	0	0
Tb927.1.490	Tb927.1.490	Tb927.01.0490	hypothetical protein	ZUnknown	79.8	-0.8447	0.00177	0	0	0	1	-0.9626	0.583869	0	0	0
Tb927.1.700	Tb927.1.700	Tb927.01.0700	phosphoglycerate kinase (PGKC)	Glucose.glycerol	7951.5	-0.8393	4.72e-44	0	0	0	1	0.0305	0.999265	0	0	0
Tb927.1.1670	Tb927.1.1670	Tb927.01.1670	ARM-like helical domain-containing protein	ZUnknown	3216	-0.646	2.92e-22	0	0	0	1	-0.4696	0.219012	0	0	1
Tb927.1.1880	Tb927.1.1880	Tb927.01.1880	WD40 repeat-containing protein	ZUnknown	4157.7	-0.6419	7.73e-26	0	0	0	1	0.0479	0.999265	0	0	1
Tb927.1.1890	Tb927.1.1890	Tb927.01.1890	RCCP Replication Factor C Subunit 1-related protein	DNA	2158.6	-0.6531	9.54e-20	0	0	0	1	-0.0283	0.999265	0	0	1
Tb927.1.1910	Tb927.1.1910	Tb927.01.1910	MORN repeat-containing protein	Cytoskeleton	2428.9	-0.735	1.72e-22	0	0	0	1	-0.1825	0.944858	0	0	1
Tb927.1.1930	Tb927.1.1930	Tb927.01.1930	TOR4 protein kinase = TOR-like 2	Protein.kinase	10107.8	-0.7288	8.71e-28	0	0	0	1	0.4389	0.657511	0	0	1
Tb927.1.2150	Tb927.1.2150	Tb927.01.2150	calpain-like protein fragment, putative,calpain-like cysteine peptidase, Clan CA, family C2	Protease	195.6	-0.6162	0.000311	0	0	0	1	-0.0115	0.999265	0	0	1
Tb927.1.2190	Tb927.1.2190	Tb927.01.2190	RAPTOR-like (TOR complexes)	Signalling	6694.5	-0.7731	1.69e-29	0	0	0	1	0.4329	0.513236	0	0	1
Tb927.1.2320	Tb927.1.2320	Tb927.01.2320	hypothetical protein, conserved	ZUnknown	576.6	-0.9663	2.38e-16	0	0	0	1	-0.7623	0.0317771	0	0	1
Tb927.1.2330	Tb927.1.2330	Tb927.01.2330	beta tubulin	Cytoskeleton	47772.8	-0.67	1.26e-31	0	0	0	1	-0.1819	0.999265	0	0	1
Tb927.1.2340	Tb927.1.2340	Tb927.01.2340	alpha tubulin	Cytoskeleton	50662.6	-0.7376	3.38e-43	0	0	0	1	-0.4896	0.205885	0	0	1
Tb927.1.2350	Tb927.1.2350	Tb927.01.2350	beta tubulin	Cytoskeleton	42335.7	-0.6818	6.37e-33	0	0	0	1	-1.3346	0.00534105	0	1	0
Tb927.1.2360	Tb927.1.2360	Tb927.01.2360	alpha tubulin	Cytoskeleton	50607.8	-0.7241	5.18e-40	0	0	0	1	-0.4896	0.205885	0	0	0
Tb927.1.2370	Tb927.1.2370	Tb927.01.2370	beta tubulin	Cytoskeleton	51235.7	-0.6705	2.83e-31	0	0	0	1	-0.4438	0.292351	0	0	0
Tb927.1.2380	Tb927.1.2380	Tb927.01.2380	alpha tubulin	Cytoskeleton	50572.3	-0.7321	8.07e-42	0	0	0	1	-0.4896	0.205885	0	0	0
Tb927.1.2390	Tb927.1.2390	Tb927.01.2390	beta tubulin	Cytoskeleton	47770.7	-0.6757	5.1e-33	0	0	0	1	-0.4685	0.366476	0	0	0
Tb927.1.2400	Tb927.1.2400	Tb927.01.2400	alpha tubulin	Cytoskeleton	44815.5	-0.7354	2.51e-42	0	0	0	1	-0.4567	0.228596	0	0	0
Tb927.1.2430	Tb927.1.2430	Tb927.01.2430	histone H3	Chromatin	6358.6	-0.6651	5.95e-19	0	0	0	1	-0.7323	0.0186812	0	0	1
Tb927.1.2450	Tb927.1.2450	Tb927.01.2450	histone H3	Chromatin	6330.7	-0.6873	3.25e-21	0	0	0	1	-0.5805	0.0597887	0	0	0
Tb927.1.2470	Tb927.1.2470	Tb927.01.2470	histone H3	Chromatin	5887.3	-0.6874	8.89e-19	0	0	0	1	-0.6611	0.110354	0	0	0
Tb927.1.2490	Tb927.1.2490	Tb927.01.2490	histone H3	Chromatin	5143.1	-0.6443	4.14e-19	0	0	0	1	-0.8555	0.989812	0	0	0
Tb927.1.2510	Tb927.1.2510	Tb927.01.2510	histone H3	Chromatin	6345.9	-0.7051	4.85e-21	0	0	0	1	-0.5625	0.102074	0	0	0
Tb927.1.2530	Tb927.1.2530	Tb927.01.2530	histone H3	Chromatin	5854.5	-0.6568	2.24e-17	0	0	0	1	-0.6196	0.578736	0	0	0
Tb927.1.2550	Tb927.1.2550	Tb927.01.2550	histone H3	Chromatin	6369.9	-0.6725	9.18e-21	0	0	0	1	-0.0401	0.999265	0	0	0
Tb927.1.2570	Tb927.1.2570	Tb927.01.2570	coatomer beta subunit (beta-coP)	Vesicular.transport	6091	-0.8996	7.7e-53	0	0	0	1	-0.6474	0.242302	0	0	1
Tb927.1.2580	Tb927.1.2580	Tb927.01.2580	EAP1 exosome complex PH subunit	RNA.degradation	1355.2	-0.957	1.28e-24	0	0	0	1	-0.859	9.16083e-07	0	0	1
Tb927.1.2640	Tb927.1.2640	Tb927.01.2640	hypothetical protein, conserved	ZUnknown	718.3	-0.7508	5.97e-09	0	0	0	1	-0.7911	0.27761	0	0	1
Tb927.1.2670	Tb927.1.2670	Tb927.01.2670	flagellar protein PF16	Cytoskeleton	3895.4	-0.9236	1.83e-48	0	0	0	1	-0.593	0.126879	0	0	1
Tb927.1.2700	Tb927.1.2700	Tb927.01.2700	hypothetical protein, conserved	ZUnknown	836.8	-0.6897	1.15e-13	0	0	0	1	-0.799	3.22484e-07	0	0	1
Tb927.1.2710	Tb927.1.2710	Tb927.01.2710	hypothetical protein, conserved	ZUnknown	1437.7	-0.6714	7.56e-19	0	0	0	1	-0.4865	0.164039	0	0	1
Tb927.1.2730	Tb927.1.2730	Tb927.01.2730	hypothetical protein, conserved	ZUnknown	809.7	-0.6116	3.75e-12	0	0	0	1	-0.4152	0.326231	0	0	1
Tb927.1.2740	Tb927.1.2740	Tb927.01.2740	lipase-like protein, putative	Lipids	1116.2	-0.6877	4.11e-17	0	0	0	1	-0.8646	1.39126e-10	0	0	1
Tb927.1.2750	Tb927.1.2750	Tb927.01.2750	hypothetical protein, conserved	ZUnknown	1083.1	-0.7631	1.23e-10	0	0	0	1	-0.854	0.00123723	0	0	1
Tb927.1.2770	Tb927.1.2770	Tb927.01.2770	hypothetical protein, conserved	ZUnknown	646.5	-0.7807	6.89e-15	0	0	0	1	-0.87	0.00196689	0	0	1
Tb927.1.3350	Tb927.1.3350	Tb927.01.3350	hypothetical protein	ZUnknown	56.5	-0.9384	0.000981	0	0	0	1	-0.3159	0.999265	0	0	1
Tb927.1.3450	Tb927.1.3450	Tb927.01.3450	hypothetical protein, conserved	ZUnknown	2000.7	-0.6691	5.15e-19	0	0	0	1	-0.6933	0.0463792	0	0	1
Tb927.1.3830	Tb927.1.3830	Tb927.01.3830	glucose-6-phosphate isomerase, glycosomal (PGI)	Glucose.glycerol	12276.7	-0.7651	4.35e-31	0	0	0	1	0.5504	0.295756	0	0	1
Tb927.1.4650	Tb927.1.4650	Tb927.01.4650	cyclin-like F-box protein (CFB2)	Ubiquitin.proteasome	6366.6	-0.7768	1.13e-32	0	0	0	1	1.6373	0.00192657	1	0	1
Tb927.1.5180	Tb927.1.5180	Tb927.01.5180	hypothetical protein	ZUnknown	281.7	-0.8441	1.48e-10	0	0	0	1			0	0	1
Tb927.2.2020	Tb927.2.2020	Tb927.02.2020	ESAG3, putative	ESAG	669.1	-0.6259	4.3e-09	0	0	0	1	-0.9732	0.0186613	0	0	1
Tb927.2.2060	Tb927.2.2060	Tb927.02.2060	variant surface glycoprotein (VSG)-related, putative (25N14.235)	VSG	1086.3	-0.8448	7.02e-27	0	0	0	1	-0.6083	0.945776	0	0	0
Tb927.2.2670	Tb927.2.2670	Tb927.02.2670	histone H4 variant	Chromatin	2200.9	-0.7275	1.34e-25	0	0	0	1	-0.4324	0.209324	0	0	1
Tb927.2.3080	Tb927.2.3080	Tb927.02.3080	fatty acid desaturase, putative,oleate desaturase, putative	Lipids	4165.3	-0.6762	5.22e-21	0	0	0	1	-0.163	0.999265	0	0	1
Tb927.2.3270	Tb927.2.3270	Tb927.02.3270	65 kDa invariant surface glycoprotein (ISG65)	Membrane.protein	670.7	-0.9481	3.26e-23	0	0	0	1	-0.8114	0.520071	0	0	0
Tb927.2.3280	Tb927.2.3280	Tb927.02.3280	65 kDa invariant surface glycoprotein (ISG65)	Membrane.protein	682	-0.7952	2.58e-09	0	0	0	1	-2.2443	0.999265	0	0	0
Tb927.2.3290	Tb927.2.3290	Tb927.02.3290	65 kDa invariant surface glycoprotein (ISG65)	Membrane.protein	282	-0.9296	4.19e-11	0	0	0	1	-1.2991	0.187034	0	0	0
Tb927.2.3300	Tb927.2.3300	Tb927.02.3300	65 kDa invariant surface glycoprotein (ISG65)	Membrane.protein	286.5	-0.8837	7.16e-09	0	0	0	1			0	0	0
Tb927.2.3310	Tb927.2.3310	Tb927.02.3310	65 kDa invariant surface glycoprotein (ISG65)	Membrane.protein	389.1	-0.851	5.69e-11	0	0	0	1	-0.7232	0.99828	0	0	0
Tb927.2.3780	Tb927.2.3780	Tb927.02.3780	IF2 translation initiation factor IF-2, putative	Translation	5027.2	-0.8846	3.32e-36	0	0	0	1	-0.3616	0.692582	0	0	1
Tb927.2.4580	Tb927.2.4580	Tb927.02.4580	UNC119 (unc119)	Cytoskeleton	2198.2	-0.9688	1.69e-38	0	0	0	1	-0.4994	0.403477	0	0	1
Tb927.2.5300	Tb927.2.5300	Tb927.02.5300	hypothetical protein, conserved, signal pep, lectin-like domain	ZUnknown	312.1	-0.7455	1.51e-08	0	0	0	1	-0.4974	0.93513	0	0	0
Tb927.2.5360	Tb927.2.5360	Tb927.02.5360	hypothetical protein, conserved, signal pep, lectin-like domain	ZUnknown	278	-0.9016	5.72e-11	0	0	0	1	-1.0576	0.277048	0	0	0
Tb927.2.5660	Tb927.2.5660	Tb927.02.5660	adenylate kinase, putative (ADKA)	Nucleotides	1397.1	-0.6302	1.01e-15	0	0	0	1	-0.0403	0.999265	0	0	1
Tb927.2.6180	Tb927.2.6180	Tb927.02.6180	iron/ascorbate oxidoreductase family protein, putative	Mito.pathway	427.8	-0.8282	4.14e-11	0	0	0	1	-0.391	0.999265	0	0	0
Tb927.2.6210	Tb927.2.6210	Tb927.02.6210	iron/ascorbate oxidoreductase family protein, putative	Mito.pathway	221.6	-0.7329	3.32e-06	0	0	0	1	-2.0135	0.213996	0	0	0
Tb927.3.1480	Tb927.3.1480	Tb927.03.1480	RNI-like superfamily protein, leucine-rich repeats, E-K-R-rich N-terminus	ZUnknown	212.5	-0.7826	5.41e-07	0	0	0	1	-0.7465	0.999265	0	0	1
Tb927.3.3270	Tb927.3.3270	Tb927.03.3270	ATP-dependent phosphofructokinase (TbPFK)	Glucose.glycerol	22703.5	-0.9363	2.4e-22	0	0	0	1	-0.2632	0.999265	0	0	1
Tb927.3.5690	Tb927.3.5690	Tb927.03.5690	hypothetical protein, conserved	ZUnknown	157.4	-0.734	5.09e-05	0	0	0	1	-0.4795	0.999265	0	0	1
Tb927.4.180	Tb927.4.180	Tb927.04.0180	hypothetical protein	ZUnknown	285.9	-0.6924	3.92e-07	0	0	0	1	-0.9019	0.578839	0	0	0
Tb927.4.360	Tb927.4.360	Tb927.04.0360	1,2-Dihydroxy-3-keto-5-methylthiopentene dioxygenase, putative	Amino.acids	1868.8	-0.7164	8.85e-15	0	0	0	1	-0.2197	0.999265	0	0	1
Tb927.4.450	Tb927.4.450	Tb927.04.0450	coatomer alpha subunit, putative (TbCoatomerAlpha)	Vesicular.transport	6179.4	-0.6608	3.21e-29	0	0	0	1	-0.3962	0.92201	0	0	1
Tb927.4.470	Tb927.4.470	Tb927.04.0470	snoRNP protein GAR1, putative	rRNA.tRNA.process	1195.6	-0.7637	4.16e-10	0	0	0	1	-0.5084	0.0441463	0	0	1
Tb927.4.590	Tb927.4.590	Tb927.04.0590	PQQ-like domain/Protein of unknown function (DUF1620), putative	ZUnknown	4900.4	-0.699	4.16e-29	0	0	0	1	-0.6797	0.0186812	0	0	1
Tb927.4.620	Tb927.4.620	Tb927.04.0620	hypothetical protein, conserved	Cytoskeleton	7134.9	-0.6144	2.22e-27	0	0	0	1	-0.5905	0.221352	0	0	1
Tb927.4.660	Tb927.4.660	Tb927.04.0660	hypothetical protein, conserved	ZUnknown	2216.4	-0.5942	2.56e-17	0	0	0	1	-0.415	0.263542	0	0	1
Tb927.4.700	Tb927.4.700	Tb927.04.0700	hypothetical protein, conserved	ZUnknown	523.4	-0.609	8.05e-09	0	0	0	1	-0.2691	0.6648	0	0	1
Tb927.4.710	Tb927.4.710	Tb927.04.0710	hypothetical protein, conserved	ZUnknown	899.6	-0.6645	7.11e-14	0	0	0	1	1.467	0.00838514	1	0	1
Tb927.4.870	Tb927.4.870	Tb927.04.0870	dynein heavy chain DNAH10 IAD-1alpha inner arm dynein heavy chain	Cytoskeleton	31781.1	-0.7156	2.93e-42	0	0	0	1	-0.4297	0.780787	0	0	1
Tb927.4.970	Tb927.4.970	Tb927.04.0970	hypothetical protein, conserved, no clear yeast or human matches	ZUnknown	191.9	-0.626	0.000503	0	0	0	1	-0.661	0.404703	0	0	1
Tb927.4.2530	Tb927.4.2530	Tb927.04.2530	hypothetical protein, conserved	ZUnknown	5261.4	-0.6066	1.54e-21	0	0	0	1	-0.4833	0.445086	0	0	1
Tb927.4.2610	Tb927.4.2610	Tb927.04.2610	hypothetical protein	ZUnknown	625	-0.7946	5.31e-16	0	0	0	1	-0.2632	0.95615	0	0	1
Tb927.4.2670	Tb927.4.2670	Tb927.04.2670	pyroglutamyl-peptidase I, putative (PPI)	Protease	661.3	-0.6496	1.18e-11	0	0	0	1	-0.2404	0.665314	0	0	1
Tb927.4.2800	Tb927.4.2800	Tb927.04.2800	R3H-associated N-terminal domain containing protein, putative	ZUnknown	1925.9	-0.7651	4.87e-27	0	0	0	1	0.6662	0.424282	0	0	1
Tb927.4.2820	Tb927.4.2820	Tb927.04.2820	hypothetical protein, conserved	ZUnknown	1817.6	-0.7182	5e-22	0	0	0	1	-0.3515	0.609243	0	0	1
Tb927.4.2840	Tb927.4.2840	Tb927.04.2840	hypothetical protein, conserved	ZUnknown	957.1	-0.6444	2.56e-11	0	0	0	1	-0.0705	0.999265	0	0	1
Tb927.4.2880	Tb927.4.2880	Tb927.04.2880	TbNup225 Inner ring	Nuclear.transport	8479.5	-0.7317	2.95e-35	0	0	0	1	-0.2158	0.999265	0	0	1
Tb927.4.2910	Tb927.4.2910	Tb927.04.2910	hypothetical protein, conserved	ZUnknown	1615	-0.5896	3.53e-15	0	0	0	1	-0.1812	0.999265	0	0	1
Tb927.4.2920	Tb927.4.2920	Tb927.04.2920	hypothetical protein, conserved	ZUnknown	2765.7	-0.7431	2.74e-25	0	0	0	1	-0.4322	0.250641	0	0	1
Tb927.4.2990	Tb927.4.2990	Tb927.04.2990	hypothetical protein, conserved, mono ntd cyclase domains at Cter	ZUnknown	1495.3	-0.7353	4.56e-24	0	0	0	1	-0.2323	0.818589	0	0	1
Tb927.4.3000	Tb927.4.3000	Tb927.04.3000	hypothetical protein, conserved, F-box domains,P-loop Ntd triphosphate hydrolase	ZUnknown	406.4	-0.6095	3.85e-07	0	0	0	1	-0.1977	0.824303	0	0	1
Tb927.4.3020	Tb927.4.3020	Tb927.04.3020	ATP-dependent DEAH-box RNA helicase, putative	Mito.RNA	1332	-0.7457	6.78e-19	0	0	0	1	-0.3605	0.6693	0	0	1
Tb927.4.3030	Tb927.4.3030	Tb927.04.3030	hypothetical protein, conserved	ZUnknown	497	-0.6192	3.29e-09	0	0	0	1	0.0378	0.999265	0	0	1
Tb927.4.3050	Tb927.4.3050	Tb927.04.3050	hypothetical protein, has a prim pol domain	ZUnknown	228.6	-0.5874	0.000318	0	0	0	1	-0.3833	0.245699	0	0	1
Tb927.4.3060	Tb927.4.3060	Tb927.04.3060	hypothetical protein, conserved, PLP dependent transferases like domain	Translation	829.6	-0.9309	3.02e-14	0	0	0	1	-0.1702	0.999265	0	0	1
Tb927.4.3070	Tb927.4.3070	Tb927.04.3070	hypothetical protein, conserved	ZUnknown	671.2	-0.7837	2.22e-15	0	0	0	1	-0.1603	0.712252	0	0	1
Tb927.4.3080	Tb927.4.3080	Tb927.04.3080	Uncharacterised ACR, YggU family COG1872, putative	ZUnknown	185.1	-0.5882	0.000534	0	0	0	1	-0.2716	0.753309	0	0	1
Tb927.4.3090	Tb927.4.3090	Tb927.04.3090	hypothetical protein, conserved	ZUnknown	284.7	-0.6102	4.7e-05	0	0	0	1	-0.204	0.718691	0	0	1
Tb927.4.3110	Tb927.4.3110	Tb927.04.3110	tRNA-dihydrouridine synthase 4, putative	rRNA.tRNA.process	325.9	-0.639	1.76e-06	0	0	0	1	-0.2015	0.985724	0	0	1
Tb927.4.3120	Tb927.4.3120	Tb927.04.3120	hook complex protein, conserved	Cytoskeleton	827.7	-0.6353	2.48e-13	0	0	0	1	-0.1043	0.999265	0	0	1
Tb927.4.3130	Tb927.4.3130	Tb927.04.3130	CMF1, Spef1, flagellar component	Cytoskeleton	649.5	-0.7758	5.99e-14	0	0	0	1	-0.217	0.204407	0	0	1
Tb927.4.3140	Tb927.4.3140	Tb927.04.3140	Homologue of yeast SDO1 and human SBDS, involved in 60S ribosome maturation	rRNA.tRNA.process	1007.4	-0.8575	5.18e-21	0	0	0	1	-0.3202	0.611661	0	0	1
Tb927.4.3150	Tb927.4.3150	Tb927.04.3150	hypothetical protein, conserved, ATPase domain of HSP90, DNA TopoII	ZUnknown	779.7	-0.9126	3.82e-22	0	0	0	1	-0.2853	0.670888	0	0	1
Tb927.4.3160	Tb927.4.3160	Tb927.04.3160	Dihydroxyacetonephosphate acyltransferase	Lipids	2648.8	-0.9474	4.41e-46	0	0	0	1	0.0877	0.999265	0	0	1
Tb927.4.3180	Tb927.4.3180	Tb927.04.3180	hypothetical protein, conserved	ZUnknown	406.9	-0.6061	1.94e-07	0	0	0	1	-0.2255	0.985724	0	0	1
Tb927.4.3760	Tb927.4.3760	Tb927.04.3760	hypothetical protein	ZUnknown	478.1	-0.7123	1.23e-10	0	0	0	1	0.616	0.810837	0	0	1
Tb927.4.3780	Tb927.4.3780	Tb927.04.3780	hypothetical protein, conserved	ZUnknown	273	-0.6524	1.54e-06	0	0	0	1	-0.1437	0.999265	0	0	1
Tb927.4.3810	Tb927.4.3810	Tb927.04.3810	DNA-directed RNA polymerase II subunit 2, p(RPB2)	RNA.synthesis	4837.1	-0.9495	8.86e-48	0	0	0	1	-0.3823	0.464232	0	0	1
Tb927.4.3820	Tb927.4.3820	Tb927.04.3820	hypothetical protein, conserved	ZUnknown	771.1	-0.7093	4.88e-15	0	0	0	1	-0.2572	0.996189	0	0	1
Tb927.4.3890	Tb927.4.3890	Tb927.04.3890	ATP-dependent DEAD/H RNA helicase, weak match to HsDDX39 (translation of structured mRNAs) no clear yeast homologue	RNA.helicase	5215.7	-0.8027	4.19e-31	0	0	0	1	-0.4039	0.594399	0	0	1
Tb927.4.3900	Tb927.4.3900	Tb927.04.3900	hypothetical protein, conserved	ZUnknown	987.7	-0.6138	3.91e-11	0	0	0	1	-0.4422	0.412796	0	0	1
Tb927.4.3910	Tb927.4.3910	Tb927.04.3910	kinesin Kif13-4	Cytoskeleton	1762.1	-0.6648	3.55e-17	0	0	0	1	-0.1541	0.999265	0	0	1
Tb927.4.3950	Tb927.4.3950	Tb927.04.3950	cytoskeleton-associated protein CAP5.5, putative,cysteine peptidase, Clan CA, family C2, putative (CAP5.5)	Cytoskeleton	3183.8	-0.9392	4.71e-45	0	0	0	1	-0.5403	0.446041	0	0	0
Tb927.4.3980.2	Tb927.4.3980	Tb927.04.3980	chaperone DNAj, putative, J41	Chaperone	1819.5	-0.6088	8.76e-11	0	0	0	1	0.121	0.906771	0	0	1
Tb927.4.3980.1	Tb927.4.3980	Tb927.04.3980	chaperone DNAj, putative, J41	Chaperone	1819.1	-0.6084	9.07e-11	0	0	0	1	0.121	0.906771	0	0	1
Tb927.4.4030	Tb927.4.4030	Tb927.04.4030	CCCH zinc finger in TRM13 protein/U11-48K-like CHHC zinc finger/Methyltransferase TRM13, putative	ZUnknown	735.9	-0.6189	2.72e-09	0	0	0	1	-0.2756	0.720259	0	0	1
Tb927.4.4150	Tb927.4.4150	Tb927.04.4150	mitochondrial RNA binding complex 1 subunit (MRB4150)	Mito.RNA	1783.2	-0.7382	1.07e-19	0	0	0	1	-0.2398	0.909575	0	0	1
Tb927.4.4580	Tb927.4.4580	Tb927.04.4580	hypothetical protein, conserved, no clear yeast or human matches	ZUnknown	7653.3	-0.6632	1.13e-21	0	0	0	1	1.1401	0.000276842	1	0	1
Tb927.5.610	Tb927.5.610	Tb927.05.0610	acidic phosphatase, putative	Phosphatase	3979.2	-0.817	9.84e-33	0	0	0	1	-0.1086	0.999265	0	0	1
Tb927.5.1390	Tb927.5.1390	Tb927.05.1390	64 kDa invariant surface glycoprotein (ISG64)	Membrane.protein	451.2	-0.9098	2.51e-09	0	0	0	1	-0.4298	0.999265	0	0	0
Tb927.5.1410	Tb927.5.1410	Tb927.05.1410	64 kDa invariant surface glycoprotein (ISG64)	Membrane.protein	981.2	-0.9255	7.28e-14	0	0	0	1	-0.4353	0.999265	0	0	0
Tb927.5.1420	Tb927.5.1420	Tb927.05.1420	hypothetical protein	ZUnknown	312.2	-0.8374	7.7e-08	0	0	0	1	-0.3755	0.999265	0	0	0
Tb927.5.1440	Tb927.5.1440	Tb927.05.1440	hypothetical protein	ZUnknown	256.7	-0.9035	3.76e-10	0	0	0	1	-0.0486	0.999265	0	0	0
Tb927.5.1760	Tb927.5.1760	Tb927.05.1760	Isoprenylcysteine alpha-carbonyl methylesterase, putative	ZUnknown	4407.5	-0.8014	2.9e-34	0	0	0	1	0.5739	0.244883	0	0	1
Tb927.5.1770	Tb927.5.1770	Tb927.05.1770	RNA pseudouridylate synthase, putative	ZUnknown	4633.4	-0.8194	1.47e-43	0	0	0	1	0.0453	0.999265	0	0	1
Tb927.5.1880	Tb927.5.1880	Tb927.05.1880	inhibitor of serine peptidase (ISP), putative,ecotin family (I11), putative	Protease	1759.4	-0.6525	3.94e-18	0	0	0	1	-0.2815	0.840196	0	0	1
Tb927.5.1940	Tb927.5.1940	Tb927.05.1940	hypothetical protein, conserved	ZUnknown	1070.2	-0.6537	1.58e-13	0	0	0	1	-0.5516	0.0898539	0	0	1
Tb927.5.2520	Tb927.5.2520	Tb927.05.2520	TPR repeat, putative	ZUnknown	1960.5	-0.6751	2.84e-17	0	0	0	1	-0.4202	0.475843	0	0	1
Tb927.5.2570	Tb927.5.2570	Tb927.05.2570	EIF3B translation initiation factor	Translation	4037.7	-0.6616	8.66e-21	0	0	0	1	-0.4384	0.322306	0	0	1
Tb927.5.3170	Tb927.5.3170	Tb927.05.3170	ribose-phosphate pyrophosphokinase, putative (PRPS5)	PPP	3439.8	-0.6306	9.97e-23	0	0	0	1	-0.8239	0.0418888	0	0	1
Tb927.5.3800	Tb927.5.3800	Tb927.05.3800	glutamine hydrolysing (not ammonia-dependent) carbomoyl phosphate synthase, putative	Amino.acids	16956.9	-0.7442	8.48e-42	0	0	0	1	-0.4995	0.798504	0	0	1
Tb927.5.3810	Tb927.5.3810	Tb927.05.3810	orotidine-5-phosphate decarboxylase/orotate phosphoribosyltransferase, OMPDCase-OPRTase	Nucleotides	3397.3	-0.8554	5.92e-35	0	0	0	1	0.0065	0.999265	0	0	1
Tb927.6.1800	Tb927.6.1800	Tb927.06.1800	protein phosphatase 2C, putative	Protein.phosphatase	3420.4	-0.7501	2.85e-32	0	0	0	1	2.1726	2.65158e-10	1	0	1
Tb927.6.1900	Tb927.6.1900	Tb927.06.1900	U3/U14 snoRNA-associated small subunit rRNA processing protein, =yeast Enp1	rRNA.tRNA.process	1404.8	-0.5873	1e-14	0	0	0	1	-0.3343	0.479656	0	0	1
Tb927.6.3510	Tb927.6.3510	Tb927.06.3510	tRNA modification enzyme, putative	rRNA.tRNA.process	742.2	-0.6159	2.42e-10	0	0	0	1	-0.5396	0.0202009	0	0	1
Tb927.6.3540	Tb927.6.3540	Tb927.06.3540	zinc-finger protein, conserved	Zinc.finger	709.5	-0.799	8.1e-18	0	0	0	1	-0.5328	0.0195261	0	0	1
Tb927.6.3610	Tb927.6.3610	Tb927.06.3610	SET domain containing protein, putative	ZUnknown	707	-0.6542	7.61e-13	0	0	0	1	-0.3956	0.0393398	0	0	1
Tb927.6.3630	Tb927.6.3630	Tb927.06.3630	Sphingosine-1-phosphate lyase	Lipids	1785.4	-0.7423	2.31e-26	0	0	0	1	-0.5478	0.122185	0	0	1
Tb927.6.3720	Tb927.6.3720	Tb927.06.3720	hypothetical protein, conserved	ZUnknown	2476.8	-0.7315	2.99e-28	0	0	0	1	-0.4708	0.00510465	0	0	1
Tb927.6.3740	Tb927.6.3740	Tb927.06.3740	heat shock 70 kDa protein, mitochondrial precursor, putative	Mito.biogenesis	6349.5	-0.6252	1.36e-22	0	0	0	1	-0.8235	0.612298	0	0	1
Tb927.6.3750	Tb927.6.3750	Tb927.06.3750	heat shock 70 kDa protein, mitochondrial precursor, putative	Mito.biogenesis	7763.4	-0.5968	3.75e-19	0	0	0	1	-0.7207	0.0222404	0	0	0
Tb927.6.3800	Tb927.6.3800	Tb927.06.3800	heat shock 70 kDa protein, mitochondrial precursor, putative	Mito.biogenesis	6775	-0.6021	7e-23	0	0	0	1	-0.7082	0.772893	0	0	0
Tb927.6.4000	Tb927.6.4000	Tb927.06.4000	small glutamine-rich tetratricopeptide repeat protein, putative (SGT)	ZUnknown	3932.7	-0.6206	1.2e-20	0	0	0	1	-0.4015	0.0338553	0	0	1
Tb927.6.4140	Tb927.6.4140	Tb927.06.4140	paraflagellar rod protein PFC4	Cytoskeleton	4218.5	-0.7419	4.08e-27	0	0	0	1	-0.2748	0.999265	0	0	1
Tb927.6.4370	Tb927.6.4370	Tb927.06.4370	eIF3d	Translation	4378.9	-0.6346	1.39e-21	0	0	0	1	-0.5709	0.00838514	0	0	1
Tb927.6.4410	Tb927.6.4410	Tb927.06.4410	S-adenosylmethionine decarboxylase (AdoMetDC)	Redox	616.7	-0.7679	2.18e-15	0	0	0	1	-0.3203	0.790817	0	0	1
Tb927.6.4440	Tb927.6.4440	Tb927.06.4440	RBP42	RNA.binding	4979.9	-0.6912	6.26e-22	0	0	0	1	-0.5155	0.0953741	0	0	1
Tb927.6.4460	Tb927.6.4460	Tb927.06.4460	S-adenosylmethionine decarboxylase (AdoMetDC)	Redox	638.2	-0.8254	6e-16	0	0	0	1	-1.2142	1.35999e-11	0	1	0
Tb927.7.1780	Tb927.7.1780	Tb927.07.1780	Adenine phosphoribosyltransferase, putative	Nucleotides	3095.9	-0.7973	7.74e-27	0	0	0	1	0.3649	0.781096	0	0	1
Tb927.7.2040	Tb927.7.2040	Tb927.07.2040	hypothetical protein, conserved	ZUnknown	265.7	-0.8959	4.38e-11	0	0	0	1	-0.2712	0.999265	0	0	1
Tb927.7.2050	Tb927.7.2050	Tb927.07.2050	R3H domain containing protein, putative	ZUnknown	1573.2	-0.8096	9.22e-27	0	0	0	1	-0.7606	0.113302	0	0	1
Tb927.7.2060	Tb927.7.2060	Tb927.07.2060	DNA repair protein ERCC1, putative	DNA	555.4	-0.8569	5.16e-18	0	0	0	1	-1.11	0.00319208	0	1	1
Tb927.7.2070	Tb927.7.2070	Tb927.07.2070	heat shock protein DNAJ, putative	Chaperone	1015.8	-0.9162	3.76e-25	0	0	0	1	-0.68	0.00121799	0	0	1
Tb927.7.2080	Tb927.7.2080	Tb927.07.2080	CGM1 Bifunctional guanylyl transferase methyltransferase	RNA.processing	1247.4	-0.7867	9.86e-23	0	0	0	1	-0.7676	0.0225481	0	0	1
Tb927.7.2110	Tb927.7.2110	Tb927.07.2110	KKT11 Kinetochore protein	Cell.cycle	472.4	-0.8874	4.87e-15	0	0	0	1	-0.522	0.840338	0	0	1
Tb927.7.2120	Tb927.7.2120	Tb927.07.2120	hypothetical protein, conserved	ZUnknown	871.4	-0.8817	3.73e-25	0	0	0	1	-0.2405	0.999265	0	0	1
Tb927.7.2130	Tb927.7.2130	Tb927.07.2130	Uncharacterized conserved protein (DUF2036), putative	ZUnknown	520.8	-0.7525	5.21e-13	0	0	0	1	-0.6794	0.134563	0	0	1
Tb927.7.2170	Tb927.7.2170	Tb927.07.2170	hypothetical protein, conserved, telomere repeat dimerization domain	ZUnknown	3626.7	-0.8932	9.91e-34	0	0	0	1	-0.656	0.467984	0	0	1
Tb927.7.2240	Tb927.7.2240	Tb927.07.2240	hypothetical protein, conserved	ZUnknown	3375.5	-0.6465	4.45e-21	0	0	0	1	-0.2868	0.999265	0	0	1
Tb927.7.2290	Tb927.7.2290	Tb927.07.2290	hypothetical protein, conserved	Cytoskeleton	1068.3	-0.8746	2.85e-19	0	0	0	1	-0.8555	0.000418026	0	0	1
Tb927.7.2330	Tb927.7.2330	Tb927.07.2330	Protein of unknown function (DUF1663), putative	ZUnknown	20545.7	-0.6153	2.49e-27	0	0	0	1	-0.4764	0.812516	0	0	0
Tb927.7.2390	Tb927.7.2390	Tb927.07.2390	TAC102, kDNA segregation	Cytoskeleton	1953.7	-0.6411	7.66e-14	0	0	0	1	-0.4974	0.262224	0	0	1
Tb927.7.2650	Tb927.7.2650	Tb927.07.2650	CAP51V	Cytoskeleton	9024.2	-0.9564	3.86e-23	0	0	0	1	0.6993	0.401562	0	0	1
Tb927.7.5490	Tb927.7.5490	Tb927.07.5490	arginine N-methyltransferase, type III (PRMT7)	Arg.methylation	1318.9	-0.6093	7.9e-14	0	0	0	1	-0.0079	0.999265	0	0	1
Tb927.7.5740	Tb927.7.5740	Tb927.07.5740	conserved protein	ZUnknown	1536.4	-0.6977	5.69e-21	0	0	0	1	-0.2072	0.550013	0	0	1
Tb927.7.5790	Tb927.7.5790	Tb927.07.5790	protein disulfide isomerase, ERp44-like	Chaperone	4278.8	-0.6973	2.18e-16	0	0	0	1	0.426	0.996189	0	0	1
Tb927.7.5950	Tb927.7.5950	Tb927.07.5950	protein associated with differentiation 3, PAD3	Transporter	748.3	-0.7315	1.51e-15	0	0	0	1	-0.8662	0.169951	0	0	0
Tb927.7.5960	Tb927.7.5960	Tb927.07.5960	protein associated with differentiation 4, PAD4	Transporter	1584.8	-0.7968	8.9e-27	0	0	0	1	0.13	0.999265	0	0	0
Tb927.7.5970	Tb927.7.5970	Tb927.07.5970	protein associated with differentiation 5, PAD5	Transporter	1137.2	-0.8605	7.8e-25	0	0	0	1	-0.5601	0.485685	0	0	0
Tb927.7.5980	Tb927.7.5980	Tb927.07.5980	protein associated with differentiation 6, PAD6	Transporter	855.9	-0.8092	1.79e-18	0	0	0	1	0.1708	0.999265	0	0	0
Tb927.7.5990	Tb927.7.5990	Tb927.07.5990	protein associated with differentiation 7, PAD7	Transporter	735.2	-0.6985	5.03e-14	0	0	0	1	-0.5366	0.45151	0	0	0
Tb927.7.6000	Tb927.7.6000	Tb927.07.6000	protein associated with differentiation 8, PAD8	Transporter	1375.5	-0.874	8.11e-27	0	0	0	1	-0.5987	0.168922	0	0	0
Tb927.7.6210	Tb927.7.6210	Tb927.07.6210	hypothetical protein, conserved	ZUnknown	523.6	-0.6061	4.13e-07	0	0	0	1	-0.3596	0.235012	0	0	1
Tb927.8.480	Tb927.8.480	Tb927.08.0480	phosphatidic acid phosphatase protein, putative	Lipids	284.7	-0.5989	0.000264	0	0	0	1	0.0425	0.999265	0	0	1
Tb927.8.540	Tb927.8.540	Tb927.08.0540	N-terminal region of Chorein, a TM vesicle-mediated sorter, putative	ZUnknown	5483.1	-0.7066	2.43e-25	0	0	0	1	-0.5473	0.0191067	0	0	1
Tb927.8.590	Tb927.8.590	Tb927.08.0590	carnitine O-palmitoyltransferase, putative	Lipids	1348.5	-0.6221	1.39e-13	0	0	0	1	-0.5149	0.000193128	0	0	1
Tb927.8.600	Tb927.8.600	Tb927.08.0600	Bucentaur or craniofacial development, putative	ZUnknown	629.8	-0.6733	2.23e-11	0	0	0	1	-0.224	0.75283	0	0	1
Tb927.8.610	Tb927.8.610	Tb927.08.0610	hypothetical protein, conserved	ZUnknown	2086.7	-0.8519	2.36e-24	0	0	0	1	-0.3301	0.869665	0	0	1
Tb927.8.620	Tb927.8.620	Tb927.08.0620	KREPA3	Mito.RNA	806.1	-0.7141	3.63e-13	0	0	0	1	-0.4654	0.0194068	0	0	1
Tb927.8.640	Tb927.8.640	Tb927.08.0640	Dpy-30 motif containing protein, putative	ZUnknown	231.2	-0.7049	5.07e-06	0	0	0	1	-0.3872	0.407561	0	0	1
Tb927.8.660	Tb927.8.660	Tb927.08.0660	Sel1 repeat, putative	ZUnknown	329.4	-0.8937	1.06e-10	0	0	0	1	-0.4381	0.123931	0	0	1
Tb927.8.670	Tb927.8.670	Tb927.08.0670	hypothetical protein, conserved	ZUnknown	758.9	-0.6333	3.97e-11	0	0	0	1	0.9936	4.30389e-07	0	0	1
Tb927.8.690	Tb927.8.690	Tb927.08.0690	peptidyl-prolyl cis-trans isomerase/rotamase, putative,PPIase, putative (PIN1)	Chaperone	664	-0.6641	2.71e-09	0	0	0	1	-0.2377	0.886867	0	0	1
Tb927.8.710	Tb927.8.710	Tb927.08.0710	DRBD17	RNA.binding	13958.1	-0.8245	8.17e-32	0	0	0	1	-0.3522	0.879444	0	0	1
Tb927.8.720	Tb927.8.720	Tb927.08.0720	CIA2B, Fe-S cluster biogenesis	Enzyme	633.2	-0.7398	8.56e-12	0	0	0	1	-0.4854	0.269842	0	0	1
Tb927.8.740	Tb927.8.740	Tb927.08.0740	nucleolar RNA-binding protein, truncated	rRNA.tRNA.process	357.6	-0.8316	1.5e-10	0	0	0	1	-0.3043	0.878338	0	0	1
Tb927.8.900	Tb927.8.900	Tb927.08.0900	splicing factor TSR1 (TSR1)	RNA.processing	1984.2	-0.6837	3e-12	0	0	0	1	0.0375	0.999265	0	0	1
Tb927.8.990	Tb927.8.990	Tb927.08.0990	RBP33	RNA.binding	2304.7	-0.7	5.17e-25	0	0	0	1	-0.1138	0.999265	0	0	1
Tb927.8.1510	Tb927.8.1510	Tb927.08.1510	ATP-dependent DEAD/H RNA helicase, putative Dbp3, ribosome biogenesis? Cis-spliced	rRNA.tRNA.process	3427.1	-0.9213	8.17e-30	0	0	0	1	-0.7276	0.0584923	0	0	1
Tb927.8.1760	Tb927.8.1760	Tb927.08.1760	hypothetical protein	ZUnknown	609.3	-0.6785	2.18e-09	0	0	0	1	0.471	0.314704	0	0	1
Tb927.8.1770	Tb927.8.1770	Tb927.08.1770	hypothetical protein, conserved	Mito.pathway	2469.6	-0.6377	1.16e-20	0	0	0	1	0.6918	0.0664766	0	0	1
Tb927.8.3350	Tb927.8.3350	Tb927.08.3350	DNA polymerase theta (helicase domain only), putative	DNA	1380.8	-0.9889	1.71e-38	0	0	0	1	-0.4455	0.328808	0	0	1
Tb927.8.3360	Tb927.8.3360	Tb927.08.3360	hypothetical protein, conserved	ZUnknown	290.7	-0.6235	6.92e-06	0	0	0	1	-0.4493	0.0534897	0	0	1
Tb927.8.3430	Tb927.8.3430	Tb927.08.3430	MKS1	Cytoskeleton	437.5	-0.776	1.54e-12	0	0	0	1	-0.4472	0.00438656	0	0	1
Tb927.8.3440	Tb927.8.3440	Tb927.08.3440	hypothetical protein, conserved	ZUnknown	251	-0.8199	3.35e-09	0	0	0	1	-0.5367	0.0561373	0	0	1
Tb927.8.3450	Tb927.8.3450	Tb927.08.3450	hypothetical protein, conserved	ZUnknown	550.5	-0.8175	1.34e-15	0	0	0	1	-0.5849	0.0148368	0	0	1
Tb927.8.3470	Tb927.8.3470	Tb927.08.3470	Vesicle transport v-SNARE protein N-terminus, putative	ZUnknown	810.5	-0.7391	1.75e-16	0	0	0	1	-0.6291	0.0248186	0	0	1
Tb927.8.3520	Tb927.8.3520	Tb927.08.3520	hypothetical protein, conserved	ZUnknown	871.6	-0.8047	2.09e-17	0	0	0	1	-0.4117	0.634307	0	0	1
Tb927.8.3530	Tb927.8.3530	Tb927.08.3530	glycerol-3-phosphate dehydrogenase (NAD), glycosomal	Glucose.glycerol	14320.1	-0.9368	9.56e-41	0	0	0	1	-0.0518	0.999265	0	0	1
Tb927.8.3730	Tb927.8.3730	Tb927.08.3730	COPI associated protein, putative	ZUnknown	687.1	-0.788	3.99e-13	0	0	0	1	-0.7026	0.0185781	0	0	1
Tb927.8.4340	Tb927.8.4340	Tb927.08.4340	hypothetical protein, conserved, signal peptide, 4TM domains, no functional domains or BLASTp hits	ZUnknown	818	-0.7451	3.33e-14	0	0	0	1	1.0847	0.00055089	1	0	1
Tb927.8.4820	Tb927.8.4820	Tb927.08.4820	eIF4G3	Translation	2219.3	-0.618	2.14e-18	0	0	0	1	-0.2362	0.896778	0	0	1
Tb927.8.5050	Tb927.8.5050	Tb927.08.5050	OTU-like cysteine protease, putative	ZUnknown	2231.4	-0.6237	2.08e-16	0	0	0	1	0.5999	0.155817	0	0	1
Tb927.8.6370	Tb927.8.6370	Tb927.08.6370	Flagellar pocket collar protein FPC4	Cytoskeleton	1070.5	-0.7149	1.18e-17	0	0	0	1	-0.0629	0.999265	0	0	1
Tb927.8.6390	Tb927.8.6390	Tb927.08.6390	lysophospholipase, putative,alpha/beta hydrolase, putative (TbLysoPLA)	Lipids	3942	-0.6226	7.86e-21	0	0	0	1	0.105	0.999265	0	0	1
Tb927.8.6500	Tb927.8.6500	Tb927.08.6500	cell division cycle protein, putative	Cell.cycle	2101	-0.76	1.16e-16	0	0	0	1	-0.2595	0.659369	0	0	1
Tb927.8.6640	Tb927.8.6640	Tb927.08.6640	NAD(P) binding protein, putative	ZUnknown	2203.9	-0.6096	1.51e-18	0	0	0	1	-0.6193	0.0514259	0	0	1
Tb927.8.7330	Tb927.8.7330	Tb927.08.7330	hypothetical protein	ZUnknown	97.4	-0.7692	0.00106	0	0	0	1	1.3153	0.26476	0	0	0
Tb927.8.7820	Tb927.8.7820	Tb927.08.7820	hypothetical protein, conserved, Cold-shock DNA-binding domain.	ZUnknown	1357.5	-0.6222	8.6e-10	0	0	0	1	3.2987	6.71412e-15	1	0	1
Tb927.8.7840	Tb927.8.7840	Tb927.08.7840	dynein heavy chain, putative, not a DHC in Wickstead analysis	Cytoskeleton	1271.8	-0.6931	2.39e-16	0	0	0	1	0.9868	0.00736209	0	0	1
Tb927.8.7970	Tb927.8.7970	Tb927.08.7970	hypothetical protein, brucei-evansi-specific	ZUnknown	4401.7	-0.9763	1.17e-34	0	0	0	1	2.5871	6.72719e-13	1	0	1
Tb927.8.7990	Tb927.8.7990	Tb927.08.7990	Thioredoxin-like/Protein of unknown function (DUF3638)/Protein of unknown function (DUF3645), putative	ZUnknown	27713.7	-0.7837	6.05e-34	0	0	0	1	-0.4321	0.851367	0	0	1
Tb927.8.8020	Tb927.8.8020	Tb927.08.8020	monoglyceride lipase, putative	Lipids	413.9	-0.8734	1.83e-12	0	0	0	1	0.5976	0.0194807	0	0	1
Tb927.8.8030	Tb927.8.8030	Tb927.08.8030	emp24/gp25L/p24 family/GOLD	Vesicular.transport	1616.9	-0.9323	1.44e-32	0	0	0	1	0.1416	0.999265	0	0	1
Tb927.8.8120	Tb927.8.8120	Tb927.08.8120	hypothetical protein, conserved	ZUnknown	730.7	-0.9708	1.3e-16	0	0	0	1	-0.1154	0.965118	0	0	1
Tb927.8.8140	Tb927.8.8140	Tb927.08.8140	small GTP-binding rab protein, putative	Vesicular.transport	1838.1	-0.752	6.1e-17	0	0	0	1	0.6236	0.0560468	0	0	1
Tb927.8.8150	Tb927.8.8150	Tb927.08.8150	C2 domain containing protein, putative	ZUnknown	918.1	-0.9206	3.04e-20	0	0	0	1	0.1435	0.999265	0	0	1
Tb927.8.8160	Tb927.8.8160	Tb927.08.8160	hypothetical protein, conserved	ZUnknown	1535.9	-0.9325	6.6e-32	0	0	0	1	-0.135	0.999265	0	0	1
Tb927.8.8180	Tb927.8.8180	Tb927.08.8180	mitochondrial RNA binding complex 1 subunit (MRB8180)	Mito.RNA	2072	-0.7196	2.04e-20	0	0	0	1	-0.1412	0.999265	0	0	0
Tb927.8.8200	Tb927.8.8200	Tb927.08.8200	hypothetical protein, conserved	ZUnknown	2533.1	-0.8462	3.23e-21	0	0	0	1	-0.1415	0.999265	0	0	0
Tb927.8.8280	Tb927.8.8280	Tb927.08.8280	hypothetical protein, conserved, no domains, K-specific	ZUnknown	1540.5	-0.9848	3.47e-27	0	0	0	1	0.0913	0.999265	0	0	1
Tb927.8.8310	Tb927.8.8310	Tb927.08.8310	chaperone DNAj, putative, J70	Chaperone	1261.4	-0.8922	1.42e-27	0	0	0	1	-0.3305	0.486793	0	0	1
Tb927.8.8320	Tb927.8.8320	Tb927.08.8320	hypothetical protein, conserved	ZUnknown	639.8	-0.8188	3.22e-15	0	0	0	1	1.2018	0.00117918	1	0	1
Tb927.8.8350	Tb927.8.8350	Tb927.08.8350	mitotic centromere-associated kinesin (MCAK), putative	Cell.cycle	1750.1	-0.7211	3.48e-19	0	0	0	1	2.1368	1.51723e-13	1	0	1
Tb927.9.730	Tb927.9.730	Tb927.09.00730	hypothetical protein, conserved	ZUnknown	200	-0.6121	0.000233	0	0	0	1	-0.8408	0.98969	0	0	0
Tb927.9.740	Tb927.9.740	Tb927.09.00740	hypothetical protein, conserved	ZUnknown	346.4	-0.7961	1.09e-09	0	0	0	1	-1.086	0.276757	0	0	0
Tb927.9.7480	Tb927.9.7480	Tb927.09.07480	hypothetical protein, conserved	ZUnknown	1386.9	-0.655	3.34e-18	0	0	0	1	-0.2751	0.430567	0	0	1
Tb927.9.7550	Tb927.9.7550	Tb927.09.07550	adenylosuccinate lyase, putative	Nucleotides	1743.1	-0.6017	2.63e-17	0	0	0	1	-0.5436	0.518485	0	0	1
Tb927.9.7590	Tb927.9.7590	Tb927.09.07590	60S ribosomal protein L11	Ribosome	8389.9	-0.6367	1.56e-21	0	0	0	1	-0.8066	0.350532	0	0	1
Tb927.9.7620	Tb927.9.7620	Tb927.09.07620	60S ribosomal protein L11	Ribosome	8749.4	-0.6255	3.13e-19	0	0	0	1	-0.7737	0.195934	0	0	0
Tb927.9.7690	Tb927.9.7690	Tb927.09.07690	hypothetical protein, conserved, nucelotidyltransferase and poly(A) polymerase substrate binding domains	ZUnknown	6338.8	-0.7046	5.45e-27	0	0	0	1	0.3328	0.833747	0	0	1
Tb927.9.7700	Tb927.9.7700	Tb927.09.07700	palmitoyl acyltransferase 1, putative	Lipids	1735.8	-0.6609	6.85e-19	0	0	0	1	-0.5444	0.106997	0	0	1
Tb927.9.7720	Tb927.9.7720	Tb927.09.07720	Member of IFT complex A, tetratricopeptide repeat protein	Cytoskeleton	5389.7	-0.9161	5.82e-49	0	0	0	1	-0.5673	0.279302	0	0	1
Tb927.9.7760	Tb927.9.7760	Tb927.09.07760	DENN (AEX-3) domain containing protein, putative	ZUnknown	1723.6	-0.7696	1.97e-25	0	0	0	1	-0.3856	0.551555	0	0	1
Tb927.9.7810	Tb927.9.7810	Tb927.09.07810	hypothetical protein, conserved	ZUnknown	426.3	-0.9249	5.18e-13	0	0	0	1	-0.5045	0.00681979	0	0	1
Tb927.9.7820	Tb927.9.7820	Tb927.09.07820	hypothetical protein, conserved	ZUnknown	1661.8	-0.9769	8.99e-39	0	0	0	1	-0.6748	0.00701277	0	0	1
Tb927.9.8990	Tb927.9.8990	Tb927.09.08990	Paraflagellar rod protein, putative	Cytoskeleton	1519.9	-0.985	2.11e-40	0	0	0	1	-1.1254	0.00195825	0	1	1
Tb927.9.9000	Tb927.9.9000	Tb927.09.09000	isopentenyl-diphosphate delta-isomerase, type II	Prenylation	1553.4	-0.9612	1.1e-40	0	0	0	1	-1.0473	8.24781e-05	0	1	1
Tb927.9.9010	Tb927.9.9010	Tb927.09.09010	SAC3/GANP/Nin1/mts3/eIF-3 p25 family, putative	ZUnknown	1545.8	-0.8398	1.73e-31	0	0	0	1	-1.0926	1.85891e-05	0	1	1
Tb927.9.9020	Tb927.9.9020	Tb927.09.09020	ribosome-interacting GTPase 2, putative	Translation	662.1	-0.9923	9.9e-15	0	0	0	1	-1.0715	0.000592327	0	1	1
Tb927.9.9030	Tb927.9.9030	Tb927.09.09030	hypothetical protein, conserved	ZUnknown	1017	-0.6426	2.4e-14	0	0	0	1	-0.9051	0.00121191	0	0	1
Tb927.9.9080	Tb927.9.9080	Tb927.09.09080	POMP5	Mito.membrane	673.1	-0.724	3.15e-13	0	0	0	1	-0.9411	8.16084e-05	0	0	1
Tb927.9.9090	Tb927.9.9090	Tb927.09.09090	WD domain, G-beta repeat, putative	ZUnknown	1022.5	-0.7893	7.47e-21	0	0	0	1	-1.0948	1.09681e-06	0	1	1
Tb927.9.9140	Tb927.9.9140	Tb927.09.09140	hypothetical protein, conserved	ZUnknown	690.2	-0.6778	1.1e-11	0	0	0	1	-1.0078	7.32566e-13	0	1	1
Tb927.9.9170	Tb927.9.9170	Tb927.09.09170	hypothetical protein, conserved, P-loop NTP hydrolase domain, no yeast or human match	ZUnknown	653.7	-0.5873	8.23e-10	0	0	0	1	-1.0095	0.0020253	0	1	1
Tb927.9.9180	Tb927.9.9180	Tb927.09.09180	hypothetical protein, conserved	ZUnknown	418	-0.6091	7.57e-08	0	0	0	1	-0.9215	1.41504e-05	0	0	1
Tb927.9.9190	Tb927.9.9190	Tb927.09.09190	exocyst complex component Exo70	Vesicular.transport	1790.9	-0.6682	7.38e-21	0	0	0	1	-0.9562	3.73197e-06	0	0	1
Tb927.9.9220	Tb927.9.9220	Tb927.09.09220	hypothetical protein, conserved	ZUnknown	1481.1	-0.765	8.68e-25	0	0	0	1	-1.0907	0.00864101	0	1	1
Tb927.9.9230	Tb927.9.9230	Tb927.09.09230	hypothetical protein, conserved	ZUnknown	664.3	-0.6254	3.76e-10	0	0	0	1	-1.0705	0.000517039	0	1	1
Tb927.9.9260	Tb927.9.9260	Tb927.09.09260	hypothetical protein, conserved	ZUnknown	897	-0.7501	5.37e-17	0	0	0	1	-1.0426	0.0273662	0	1	1
Tb927.9.9280	Tb927.9.9280	Tb927.09.09280	hypothetical protein, conserved	ZUnknown	1325.3	-0.5913	7.62e-14	0	0	0	1	-0.9824	0.00044408	0	0	1
Tb927.9.9290	Tb927.9.9290	Tb927.09.09290	PABP1	Translation	4380.9	-0.8946	5.2e-36	0	0	0	1	-1.2119	4.44363e-06	0	1	1
Tb927.9.9300	Tb927.9.9300	Tb927.09.09300	hypothetical protein, conserved	ZUnknown	1298.8	-0.7926	1.08e-18	0	0	0	1	-1.0976	0.0336908	0	1	1
Tb927.9.9310	Tb927.9.9310	Tb927.09.09310	hypothetical protein, conserved	Mito.pathway	2280.5	-0.7889	4.33e-30	0	0	0	1	-1.1294	0.00117918	0	1	1
Tb927.9.9320	Tb927.9.9320	Tb927.09.09320	MOK protein kinase	Protein.kinase	1476.5	-0.9626	1.16e-32	0	0	0	1	-1.0284	2.81541e-06	0	1	1
Tb927.9.10400	Tb927.9.10400	Tb927.09.10400	hypothetical protein, conserved	ZUnknown	4376.2	-0.9003	6.84e-31	0	0	0	1	-0.5682	0.56787	0	0	0
Tb927.9.11580	Tb927.9.11580	Tb927.09.11580	Gim5A protein,glycosomal membrane protein (gim5A)	Glycosome	3105.6	-0.8848	1.12e-26	0	0	0	1	0.3678	0.871964	0	0	0
Tb927.10.1390	Tb927.10.1390	Tb927.10.01390	hypoxanthine-guanine phosphoribosyltransferase, putative	Nucleotides	2038.4	-0.8916	1.22e-25	0	0	0	1	-0.1221	0.999265	0	0	1
Tb927.10.1490	Tb927.10.1490	Tb927.10.01490	MKT1L	RNA.degradation	5017.6	-0.641	2e-15	0	0	0	1	0.387	0.911886	0	0	1
Tb927.10.1560	Tb927.10.1560	Tb927.10.01560	NOP91	Cell.cycle	2411.1	-0.6445	3.08e-14	0	0	0	1	-0.3218	0.791882	0	0	1
Tb927.10.2010	Tb927.10.2010	Tb927.10.02010	hexokinase (HK1)	Glucose.glycerol	7672	-0.8451	9.57e-22	0	0	0	1	-0.112	0.999265	0	0	0
Tb927.10.2020	Tb927.10.2020	Tb927.10.02020	hexokinase (HK2)	Glucose.glycerol	7008.2	-0.8553	1.58e-28	0	0	0	1	-0.2351	0.917726	0	0	1
Tb927.10.2370	Tb927.10.2370	Tb927.10.02370	LA	Nuclear.transport	3313.2	-0.6319	2.73e-14	0	0	0	1	-0.2353	0.95615	0	0	1
Tb927.10.2900	Tb927.10.2900	Tb927.10.02900	importin beta-1 subunit, putative	Nuclear.transport	3149.4	-0.9848	6.03e-56	0	0	0	1	-0.4904	0.5699	0	0	1
Tb927.10.5100	Tb927.10.5100	Tb927.10.05100	hypothetical protein	ZUnknown	602.4	-0.8273	2.46e-10	0	0	0	1	0.0969	0.999265	0	0	1
Tb927.10.5710	Tb927.10.5710	Tb927.10.05710	hypothetical protein, conserved, predicted GPI anchor	Membrane.protein	539	-0.9675	2.54e-20	0	0	0	1	0.6321	0.999265	0	0	0
Tb927.10.5840	Tb927.10.5840	Tb927.10.05840	EF1 beta, translation elongation factor 1-beta, putative	Translation	7416.3	-0.6051	2.97e-19	0	0	0	1	-0.2614	0.973141	0	0	1
Tb927.10.5920	Tb927.10.5920	Tb927.10.05920	hypothetical protein, conserved	ZUnknown	1456	-0.6239	2.59e-14	0	0	0	1	-0.237	0.657511	0	0	1
Tb927.10.6750	Tb927.10.6750	Tb927.10.06750	Plasma-membrane choline transporter, putative	Transporter	2430.4	-0.6545	1.86e-20	0	0	0	1	-0.0844	0.999265	0	0	0
Tb927.10.9440	Tb927.10.9440	Tb927.10.09440	NADH dehydrogenase (54 NDH2) in TAO/G3PDH complex	Mito.e.transport	2139.2	-0.5992	1.04e-14	0	0	0	1	-0.5712	0.193663	0	0	1
Tb927.10.12070	Tb927.10.12070	Tb927.10.12070	hypothetical protein	ZUnknown	229.6	-0.6608	1.3e-05	0	0	0	1	-0.7431	0.60257	0	0	0
Tb927.10.12800	Tb927.10.12800	Tb927.10.12800	ZC3H38	RNA.binding	1237.4	-0.5891	2.35e-13	0	0	0	1	1.422	0.0176423	1	0	0
Tb927.10.12820	Tb927.10.12820	Tb927.10.12820	Cysteine proteinase domains by interpro but not NCBI	ZUnknown	10911.7	-0.7018	9.89e-31	0	0	0	1	0.4224	0.839867	0	0	1
Tb927.10.12890	Tb927.10.12890	Tb927.10.12890	bifunctional aminoacyl-tRNA synthetase, putative	Translation.tRNA	6764.8	-0.799	2.5e-40	0	0	0	1	-0.4085	0.337279	0	0	1
Tb927.10.14130	Tb927.10.14130	Tb927.10.14130	SRP19 protein, putative	ZUnknown	511	-0.6339	9.34e-09	0	0	0	1	-0.1458	0.934269	0	0	1
Tb927.10.14170	Tb927.10.14170	Tb927.10.14170	aquaglyceroporin 2	Transporter	2622.9	-0.7674	2.18e-26	0	0	0	1	-0.2572	0.0902848	0	0	0
Tb927.10.14920	Tb927.10.14920	Tb927.10.14920	hypothetical protein, conserved, no clear yeast or human match	ZUnknown	3250	-0.6573	2.09e-18	0	0	0	1	-0.2586	0.958663	0	0	1
Tb927.11.780	Tb927.11.780	Tb927.11.00780	hypothetical protein, conserved	ZUnknown	5872.7	-0.6524	2.7e-28	0	0	0	1	1.9894	4.723e-30	1	0	1
Tb927.11.1280	Tb927.11.1280	Tb927.11.01280	hypothetical protein, conserved, no clear yeast or human matches	ZUnknown	830.9	-0.7763	3.62e-17	0	0	0	1	0.6596	0.426791	0	0	1
Tb927.11.1290	Tb927.11.1290	Tb927.11.01290	hypothetical protein, conserved	Mito.pathway	946.4	-0.6435	1.91e-14	0	0	0	1	-0.2295	0.164771	0	0	1
Tb927.11.1300	Tb927.11.1300	Tb927.11.01300	UBA/TS-N domain containing protein, putative	ZUnknown	1017.2	-0.9258	1.27e-28	0	0	0	1	-0.3171	0.365232	0	0	1
Tb927.11.1310	Tb927.11.1310	Tb927.11.01310	NADH-cytochrome b5 reductase, putative (B5R)	Mito.e.transport	1047.2	-0.7869	3.28e-14	0	0	0	1	-0.4701	0.711162	0	0	1
Tb927.11.1330	Tb927.11.1330	Tb927.11.01330	Stress responsive A/B Barrel Domain, putative	ZUnknown	698.8	-0.5987	9.16e-11	0	0	0	1	-0.0576	0.999265	0	0	1
Tb927.11.1340	Tb927.11.1340	Tb927.11.01340	Flagella connector protein 1, protein kinase-like domain, no yeast or human match	ZUnknown	1817.4	-0.6855	1.67e-22	0	0	0	1	-0.1679	0.999265	0	0	1
Tb927.11.1350	Tb927.11.1350	Tb927.11.01350	calcium uniporter protein, mitochondrial	Mito.pathway	737.7	-0.8681	1.57e-20	0	0	0	1	-0.0632	0.999265	0	0	1
Tb927.11.1370	Tb927.11.1370	Tb927.11.01370	glutaredoxin GRX1	Redox	900.8	-0.7437	1.58e-07	0	0	0	1	-0.1339	0.999265	0	0	1
Tb927.11.1380	Tb927.11.1380	Tb927.11.01380	Right handed beta helix region/Periplasmic copper-binding protein (NosD), putative	ZUnknown	11976	-0.8957	3.46e-50	0	0	0	1	-0.1626	0.999265	0	0	1
Tb927.11.1390	Tb927.11.1390	Tb927.11.01390	class I transcription factor A, subunit 1 (CITFA-1)	RNA.synthesis	1270.9	-0.8679	8.43e-24	0	0	0	1	-0.4936	0.217078	0	0	1
Tb927.11.1400	Tb927.11.1400	Tb927.11.01400	hypothetical protein, conserved	Mito.pathway	2006.5	-0.7384	1.36e-22	0	0	0	1	-0.2332	0.60257	0	0	1
Tb927.11.1410	Tb927.11.1410	Tb927.11.01410	class I transcription factor A, subunit 3 (CITFA-3)	RNA.synthesis	735	-0.9015	2.39e-18	0	0	0	1	-0.5707	0.0199462	0	0	1
Tb927.11.1440	Tb927.11.1440	Tb927.11.01440	hypothetical protein, conserved	ZUnknown	480.4	-0.8176	1.84e-14	0	0	0	1	-0.5026	0.0825414	0	0	1
Tb927.11.1460	Tb927.11.1460	Tb927.11.01460	phosphatidylinositol (3,5) kinase, putative	Signalling	3014.7	-0.8451	1.08e-37	0	0	0	1	-0.2129	0.960025	0	0	1
Tb927.11.6070	Tb927.11.6070	Tb927.11.06070	hypothetical protein, conserved, ARM repeat superfamily	ZUnknown	1078.9	-0.5924	2.53e-12	0	0	0	1	-0.0716	0.999265	0	0	1
Tb927.11.6080	Tb927.11.6080	Tb927.11.06080	hypothetical protein, conserved	ZUnknown	329.8	-0.6431	3.93e-05	0	0	0	1	-0.3384	0.460656	0	0	1
Tb927.11.6090	Tb927.11.6090	Tb927.11.06090	tatD related deoxyribonuclease, putative	DNA	260.8	-0.6157	8.23e-05	0	0	0	1	-0.2547	0.695857	0	0	1
Tb927.11.6130	Tb927.11.6130	Tb927.11.06130	SKP1	Ubiquitin.proteasome	2088.8	-0.8369	4.44e-33	0	0	0	1	-0.1468	0.999265	0	0	1
Tb927.11.6140	Tb927.11.6140	Tb927.11.06140	40S ribosomal protein S15A	Ribosome	4781.3	-0.6367	5.57e-22	0	0	0	1	-0.4202	0.689463	0	0	1
Tb927.11.6160	Tb927.11.6160	Tb927.11.06160	ERF3 eukaryotic release factor 3, putative	Translation	2814.2	-0.7818	2.88e-29	0	0	0	1	-0.2975	0.843107	0	0	1
Tb927.11.6170	Tb927.11.6170	Tb927.11.06170	protein transport protein Sec31, putative,cytosolic coat protein, putative	Vesicular.transport	4612.6	-0.6891	1.37e-23	0	0	0	1	-0.1877	0.999265	0	0	1
Tb927.11.6180	Tb927.11.6180	Tb927.11.06180	60S ribosomal protein L28	Ribosome	10112.9	-0.6689	2.94e-32	0	0	0	1	-0.448	0.58008	0	0	1
Tb927.11.6190	Tb927.11.6190	Tb927.11.06190	hypothetical protein, conserved	ZUnknown	207.3	-0.6986	4.69e-06	0	0	0	1	-0.1354	0.999265	0	0	1
Tb927.11.6200	Tb927.11.6200	Tb927.11.06200	60S ribosomal protein L28	Ribosome	6288.5	-0.7256	2.32e-25	0	0	0	1	-1.1247	0.999265	0	0	0
Tb927.11.6230	Tb927.11.6230	Tb927.11.06230	pretranslocation protein, alpha subunit, SEC61	Vesicular.transport	9025.4	-0.6475	8.22e-30	0	0	0	1	-0.2369	0.999265	0	0	1
Tb927.11.6440	Tb927.11.6440	Tb927.11.06440	hypothetical protein, conserved, Bromodomain and poly(Q), often in TAP MS, low similarity to coiled-coil proteins and hook proteins (cytoskeletal linkers)	ZUnknown	7215.3	-0.6767	4.62e-24	0	0	0	1	0.124	0.999265	0	0	1
Tb927.11.6860	Tb927.11.6860	Tb927.11.06860	3-UTR of 11.6870	3UTR	2869.3	-0.7084	7.21e-12	0	0	0	1	-0.3471	0.969066	0	0	0
Tb927.11.7000	Tb927.11.7000	Tb927.11.07000	hypothetical protein, conserved	ZUnknown	336.7	-0.6176	4.36e-06	0	0	0	1	1.0178	0.999265	0	0	1
Tb927.11.7580	Tb927.11.7580	Tb927.11.07580	hypothetical protein, conserved	Mito.DNA	3353	-0.6533	2.82e-22	0	0	0	1	-0.3886	0.159789	0	0	1
Tb927.11.7820	Tb927.11.7820	Tb927.11.07820	endonuclease/exonuclease/phosphatase, putative	DNA	2202.2	-0.8806	3.5e-41	0	0	0	1	2.7673	1.11609e-24	1	0	1
Tb927.11.8480	Tb927.11.8480	Tb927.11.08480	DNA polymerase kappa, putative,DNA polymerase IV, putative	DNA	137.4	-0.9598	1.41e-07	0	0	0	1	-0.4068	0.993058	0	0	0
Tb927.11.8520	Tb927.11.8520	Tb927.11.08520	DNA polymerase kappa, putative,DNA polymerase IV, putative	DNA	439.4	-0.6107	5.71e-08	0	0	0	1	-0.1872	0.969066	0	0	0
Tb927.11.8530	Tb927.11.8530	Tb927.11.08530	DNA polymerase kappa, putative,DNA polymerase IV, putative	DNA	352.4	-0.7667	1.68e-09	0	0	0	1	-0.3009	0.874955	0	0	0
Tb927.11.8580	Tb927.11.8580	Tb927.11.08580	DNA polymerase kappa, putative,DNA polymerase IV, putative	DNA	322.5	-0.783	4e-10	0	0	0	1	-0.217	0.970015	0	0	0
Tb927.11.8700	Tb927.11.8700	Tb927.11.08700	hypothetical protein, conserved, DNA PolY-like superfamily domain: trans-lesion DNA synthesis.	DNA	994.6	-0.635	7.55e-14	0	0	0	1	-0.275	0.707993	0	0	1
Tb927.11.8710	Tb927.11.8710	Tb927.11.08710	hypothetical protein, conserved	ZUnknown	760.9	-0.6247	5.52e-11	0	0	0	1	-0.3501	0.741731	0	0	1
Tb927.11.8730	Tb927.11.8730	Tb927.11.08730	ATPase, putative,S. cerevisiae cell division control protein 48 homolog, putative	Enzyme	1141.2	-0.6175	4.73e-13	0	0	0	1	-0.3672	0.798131	0	0	1
Tb927.11.8810	Tb927.11.8810	Tb927.11.08810	hypothetical protein, conserved	ZUnknown	1089.7	-0.7104	8.15e-18	0	0	0	1	-0.2788	0.460656	0	0	1
Tb927.11.8970	Tb927.11.8970	Tb927.11.08970	ribose 5-phosphate isomerase, putative	PPP	2446.2	-0.8269	1.79e-24	0	0	0	1	-0.2733	0.69075	0	0	1
Tb927.11.9080	Tb927.11.9080	Tb927.11.09080	NOP136	Cell.cycle	4194.1	-0.5939	4.45e-16	0	0	0	1	-0.4011	0.551555	0	0	1
Tb927.11.11080	Tb927.11.11080	Tb927.11.11080	TbNup149 Nup76 complex, FG, symmetric, interact MEX67	Nuclear.transport	5580.1	-0.5862	7.47e-17	0	0	0	1	-0.2197	0.879444	0	0	0
Tb927.11.11140	Tb927.11.11140	Tb927.11.11140	hypothetical protein	ZUnknown	3586.8	-0.6817	5.65e-25	0	0	0	1	-0.1325	0.999265	0	0	1
Tb927.11.11250	Tb927.11.11250	Tb927.11.11250	cytosolic malate dehydrogenase (cMDH)	Glucose.glycerol	3463.4	-0.6255	1.41e-19	0	0	0	1	-0.1237	0.95615	0	0	1
Tb927.11.11380	Tb927.11.11380	Tb927.11.11380	hypothetical protein, conserved	Mito.pathway	1263.9	-0.5987	9.44e-14	0	0	0	1	-0.4137	0.298731	0	0	1
Tb927.11.11770	Tb927.11.11770	Tb927.11.11770	eIF4E3	Translation	2429.2	-0.5922	3.02e-18	0	0	0	1	-0.5203	0.631106	0	0	1
Tb927.11.12730	Tb927.11.12730	Tb927.11.12730	hypothetical protein	ZUnknown	192.1	-0.9149	4.27e-09	0	0	0	1	-0.2875	0.182634	0	0	1
Tb927.11.13090	Tb927.11.13090	Tb927.11.13090	EF1 gamma, elongation factor 1 gamma, putative	Translation	7602.9	-0.7337	3.66e-27	0	0	0	1	-0.5114	0.00747966	0	0	0
Tb927.11.13190	Tb927.11.13190	Tb927.11.13190	EF1 gamma, elongation factor 1 gamma, putative	Translation	9272.5	-0.755	9.52e-29	0	0	0	1	-0.636	0.0474744	0	0	1
Tb927.11.13200	Tb927.11.13200	Tb927.11.13200	LEM3 (ligand-effect modulator 3) family , beta subunit of flippase?	Lipids	1981.2	-0.9294	8.5e-37	0	0	0	1	-0.7322	0.288566	0	0	1
Tb927.11.13630	Tb927.11.13630	Tb927.11.13630	hypothetical protein, conserved	ZUnknown	861.2	-0.7276	8.39e-10	0	0	0	1	0.3655	0.931666	0	0	1
Tb927.11.14600	Tb927.11.14600	Tb927.11.14600	procyclin-associated gene 2-like protein, putative	PAG	778.4	-0.6692	4.04e-07	0	0	0	1	-0.9799	0.859467	0	0	1
Tb927.11.14610	Tb927.11.14610	Tb927.11.14610	procyclin-associated gene 4 (PAG4) protein, putative	PAG	778	-0.6351	1.15e-06	0	0	0	1	-0.4441	0.999265	0	0	1
Tb927.1.1860	Tb927.1.1860	#N/A	hypothetical protein, unlikely	Unlikely	135.3	-0.9047	4.49e-05	0	0	0	1			0	0	0
Tb927.1.2000	Tb927.1.2000	#N/A	hypothetical protein, unlikely	Unlikely	129.1	-0.6371	0.00159	0	0	0	1	-0.0355	0.999265	0	0	0
Tb927.1.2070	Tb927.1.2070	#N/A	ESAG11 pseudogene	ESAG.pseudo	41.4	-0.9151	0.011	0	0	0	1			0	0	0
Tb927.1.2410	Tb927.1.2410	#N/A	beta tubulin, pseudogene	Pseudogene	25131.2	-0.6457	1.9e-23	0	0	0	1			0	0	0
Tb927.1.5170	Tb927.1.5170	#N/A	variant surface glycoprotein (VSG)-related, putative	VSG	1124	-0.7205	4.1e-11	0	0	0	1			0	0	0
Tb927.2.200	Tb927.2.200	#N/A	ESAG3 pseudogene	ESAG.pseudo	5455.3	-0.7217	2.47e-13	0	0	0	1	-1.0058	0.294709	0	0	0
Tb927.2.2029	Tb927.2.2029	#N/A	ESAG3 pseudogene	ESAG	555.5	-0.9285	1.33e-16	0	0	0	1	-0.5884	0.704051	0	0	1
Tb927.2.3090	Tb927.2.3090	#N/A	hypothetical protein, conserved	ZUnknown	1093	-0.6243	9.43e-06	0	0	0	1	-0.4081	0.965118	0	0	1
Tb927.3.480	Tb927.3.480	#N/A	VSG pseudogene,variant surface glycoprotein, degenerate	VSG	77.7	-0.8967	0.000671	0	0	0	1			0	0	0
Tb927.3.2450	Tb927.3.2450	#N/A	hypothetical protein, conserved	ZUnknown	853.2	-0.9355	4.35e-16	0	0	0	1	0.098	0.999265	0	0	1
Tb927.3.5670	Tb927.3.5670	#N/A	hypothetical protein	ZUnknown	181.5	-0.7943	3.75e-06	0	0	0	1	-1.4026	0.954852	0	0	1
Tb927.4.4120	Tb927.4.4120	#N/A	hypothetical protein, conserved	ZUnknown	467.3	-0.6735	3.44e-09	0	0	0	1	-0.1155	0.999265	0	0	1
Tb927.5.293b	Tb927.5.293b	#N/A	hypothetical protein	ZUnknown	159.3	-0.7812	9.08e-06	0	0	0	1	-1.0351	0.00818978	0	1	1
Tb927.5.1480	Tb927.5.1480	#N/A	hypothetical protein	ZUnknown	548.5	-0.666	7.78e-09	0	0	0	1	2.1431	1.0457e-08	1	0	1
Tb927.5.3990	Tb927.5.3990	#N/A	variant surface glycoprotein (VSG, atypical), putative	VSG	39.1	-0.7584	0.0419	0	0	0	1	-0.0592	0.999265	0	0	0
Tb927.5.4575	Tb927.5.4575	#N/A	hypothetical protein	ZUnknown	147.7	-0.6464	0.000579	0	0	0	1	-0.2955	0.412285	0	0	0
Tb927.5.4590	Tb927.5.4590	#N/A	small GTP-binding rab protein, pseudogene, putative	ZUnknown	57.1	-0.8446	0.00766	0	0	0	1	-0.6254	0.273013	0	0	0
Tb927.5.4620	Tb927.5.4620	#N/A	ESAG9, putative	ESAG	38.3	-0.8278	0.0229	0	0	0	1	-1.5197	0.996189	0	0	1
Tb927.5.4630	Tb927.5.4630	#N/A	ESAG1, putative	ESAG	188.6	-0.5894	0.000669	0	0	0	1			0	0	0
Tb927.6.1550	Tb927.6.1550	#N/A	POMP30 leucine-rich repeat protein (LRRP)	LRRP	1201.4	-0.6621	5.58e-17	0	0	0	1	-0.5523	0.534	0	0	1
Tb927.7.7530	Tb927.7.7530	#N/A	GRESAG 4, putative receptor-type adenylate cyclase	GRESAG	7625.3	-0.6199	8.25e-26	0	0	0	1	0.1201	0.999265	0	0	0
Tb927.8.595	Tb927.8.595	#N/A	hypothetical protein	ZUnknown	403.3	-0.9233	9.59e-15	0	0	0	1	-0.1393	0.999265	0	0	1
Tb927.8.1945	Tb927.8.1945	#N/A	hypothetical protein	ZUnknown	726.6	-0.7462	4.77e-15	0	0	0	1	1.0092	0.110553	0	0	1
Tb927.8.3521	Tb927.8.3521	#N/A	hypothetical protein	ZUnknown	77.7	-0.6124	0.0282	0	0	0	1	-0.3323	0.81364	0	0	0
Tb927.8.7880	Tb927.8.7880	#N/A	GRESAG 4 pseudogene	GRESAG	58.5	-0.7591	0.0128	0	0	0	1	-0.0452	0.999265	0	0	0
Tb927.8.8210	Tb927.8.8210	#N/A	CPSF64	RNA.processing	439	-0.8481	2.94e-14	0	0	0	1	-0.0187	0.999265	0	0	0
Tb927.9.180	Tb927.9.180	#N/A	ESAG3 pseudogene	ESAG.pseudo	155.4	-0.9754	3.46e-05	0	0	0	1			0	0	0
Tb927.9.380	Tb927.9.380	#N/A	ESAG3 pseudogene	ESAG.pseudo	214.8	-0.7037	0.000434	0	0	0	1			0	0	0
Tb927.9.680	Tb927.9.680	#N/A	ESAG9 pseudogene	ESAG.pseudo	133.7	-0.8889	5.58e-06	0	0	0	1	-0.7509	0.999265	0	0	0
Tb927.9.4207	Tb927.9.4207	#N/A	Noncoding RNA, putative	SNO	214.9	-0.8038	1.17e-07	0	0	0	1	0.5056	0.364183	0	0	0
Tb927.9.4227	Tb927.9.4227	#N/A	Noncoding RNA, putative	SNO	222	-0.8809	2.33e-09	0	0	0	1	0.5056	0.364183	0	0	0
Tb927.9.7320	Tb927.9.7320	#N/A	ESAG11, putative	ESAG	277.6	-0.7696	1.02e-07	0	0	0	1			0	0	0
Tb927.9.7370	Tb927.9.7370	#N/A	ESAG9, putative	ESAG	121.6	-0.8336	0.000125	0	0	0	1	-1.3429	0.999265	0	0	1
Tb927.9.7400	Tb927.9.7400	#N/A	ESAG11, putative	ESAG	336.8	-0.6452	6.13e-06	0	0	0	1			0	0	0
Tb927.9.7500	Tb927.9.7500	#N/A	hypothetical protein	ZUnknown	1698.1	-0.6386	0.00859	0	0	0	1	0.1545	0.999265	0	0	1
Tb927.9.7950	Tb927.9.7950	#N/A	hypothetical protein, conserved, predicted GPI anchor	Membrane.protein	104.8	-0.5924	0.0138	0	0	0	1	-0.4878	0.546921	0	0	1
Tb927.9.7960	Tb927.9.7960	#N/A	hypothetical protein	ZUnknown	90.6	-0.7207	0.0119	0	0	0	1			0	0	1
Tb927.9.14660	Tb927.9.14660	#N/A	SLACS reverse transcriptase, putative	ZUnknown	237.1	-0.6149	6.24e-05	0	0	0	1	-0.3529	0.999265	0	0	0
Tb927.9.15680	Tb927.9.15680	#N/A	ESAG6, pseudogene	ESAG.pseudo	227.3	-0.8898	3.76e-09	0	0	0	1	-1.785	0.000133113	0	1	0
Tb927.9.15790	Tb927.9.15790	#N/A	variant surface glycoprotein (VSG)-related, putative	VSG	52.7	-0.8632	0.00536	0	0	0	1			0	0	0
Tb927.9.15850	Tb927.9.15850	#N/A	hypothetical protein	ZUnknown	155.6	-0.6732	0.00158	0	0	0	1	0.0576	0.999265	0	0	1
Tb927.9.16260	Tb927.9.16260	#N/A	ESAG3, pseudogene	ESAG.pseudo	104.1	-0.6774	0.00649	0	0	0	1			0	0	0
Tb927.9.16960	Tb927.9.16960	#N/A	ESAG3, pseudogene	ESAG.pseudo	58.5	-0.6733	0.0219	0	0	0	1			0	0	0
Tb927.10.3410	Tb927.10.3410	#N/A	hypothetical protein	ZUnknown	255.6	-0.6239	0.000342	0	0	0	1	3.5614	0.0078721	1	0	1
Tb927.10.3420	Tb927.10.3420	#N/A	Not an ORF	3_UTR	285.8	-0.7998	1.47e-06	0	0	0	1	2.6797	2.72001e-06	1	0	0
Tb927.11.1480	Tb927.11.1480	#N/A	GRESAG 4, putative receptor-type adenylate cyclase	GRESAG	1665.2	-0.5908	4.62e-14	0	0	0	1	-1.1199	0.00772164	0	1	1
Tb927.11.8490.1-p1-CDS1	Tb927.11.8490	#N/A	DNA polymerase kappa, putative	DNA	213.4	-0.7961	2.56e-07	0	0	0	1	-0.2774	0.999265	0	0	0
Tb927.11.8500.1-p1-CDS1	Tb927.11.8500	#N/A	DNA polymerase kappa, putative	DNA	310.3	-0.6552	4.74e-07	0	0	0	1	-0.317	0.553496	0	0	0
Tb927.11.8510.1-p1-CDS1	Tb927.11.8510	#N/A	DNA polymerase kappa, putative	DNA	583.6	-0.8086	1.8e-15	0	0	0	1	-0.2287	0.999265	0	0	0
Tb927.11.8680	Tb927.11.8680	#N/A	DNA polymerase kappa, putative	DNA	262.8	-0.7726	4.06e-08	0	0	0	1	-0.1757	0.999265	0	0	1
Tb927.11.12130	Tb927.11.12130	#N/A	hypothetical protein	ZUnknown	303.1	-0.9682	0.00704	0	0	0	1	1.9121	0.0026691	1	0	1
Tb927.11.18040	Tb927.11.18040	#N/A	ESAG3 pseudogene	ESAG.pseudo	109.4	-0.6491	0.00352	0	0	0	1			0	0	0
Tb927.11.18650.1-p1-CDS1	Tb927.11.18650	#N/A	expression site-associated gene 1 (ESAG1) protein, putative	ESAG	132.3	-0.8881	5.8e-06	0	0	0	1			0	0	0
Tb927.11.19020.1-p1-CDS1	Tb927.11.19020	#N/A	hypothetical protein	ZUnknown	39.9	-0.8981	0.0129	0	0	0	1	0.2592	0.999265	0	0	0
Tb927.11.20560	Tb927.11.20560	#N/A	expression site-associated gene (ESAG, pseudogene), putative,expression site-associated gene 3 (ESAG3, pseudogene), putative	ESAG	61.3	-0.6819	0.0263	0	0	0	1			0	0	1
Tb05.5K5.270	Tb05.5K5.270	#N/A	ESAG9 pseudogene	ESAG.pseudo	105.5	-0.8379	0.000167	0	0	0	1			0	0	0
Tb08.27P2.330	Tb08.27P2.330	#N/A	ESAG3 pseudogene	ESAG.pseudo	48.1	-0.7147	0.0461	0	0	0	1			0	0	0
Tb08.27P2.60	Tb08.27P2.60	#N/A	hypothetical protein	ZUnknown	59.9	-0.755	0.0183	0	0	0	1			0	0	0
Tb09.v4.0010	Tb09.v4.0010	#N/A	variant surface glycoprotein (VSG), putative	VSG	139	-0.6645	0.000691	0	0	0	1			0	0	0
Tb09.v4.0014	Tb09.v4.0014	#N/A	hypothetical protein	ZUnknown	152.8	-0.8311	2e-05	0	0	0	1			0	0	0
Tb09.v4.0033	Tb09.v4.0033	#N/A	ESAG3 pseudogene	ESAG.pseudo	150.3	-0.8199	0.000481	0	0	0	1			0	0	0
Tb09.v4.0042	Tb09.v4.0042	#N/A	leucine-rich repeat protein LRRP, pseudogene	LRRP	63.4	-0.6305	0.04	0	0	0	1			0	0	0
Tb09.v4.0045	Tb09.v4.0045	#N/A	ESAG3, pseudogene	ESAG.pseudo	125.2	-0.7549	0.000389	0	0	0	1			0	0	0
Tb09.v4.0064	Tb09.v4.0064	#N/A	hypothetical protein	ZUnknown	77.9	-0.6017	0.0225	0	0	0	1			0	0	0
Tb09.v4.0104	Tb09.v4.0104	#N/A	leucine-rich repeat protein LRRP, pseudogene	LRRP	186.8	-0.7116	1.69e-05	0	0	0	1			0	0	0
Tb09.v4.0110	Tb09.v4.0110	#N/A	hypothetical protein	ZUnknown	381.2	-0.765	3.16e-06	0	0	0	1			0	0	0
Tb09.v4.0151	Tb09.v4.0151	#N/A	hypothetical protein	ZUnknown	380.9	-0.8114	8.13e-11	0	0	0	1			0	0	0
Tb09.v4.0201	Tb09.v4.0201	#N/A	ESAG3, pseudogene	ESAG.pseudo	494.1	-0.8474	5.62e-11	0	0	0	1			0	0	0
Tb10.v4.0084	Tb10.v4.0084	#N/A	VSG pseudogene	VSG	185.8	-0.6593	4.82e-05	0	0	0	1			0	0	0
Tb10.v4.0101	Tb10.v4.0101	#N/A	ESAG pseudogene	ESAG.pseudo	84.8	-0.9683	8.09e-05	0	0	0	1			0	0	0
Tb10.v4.0218	Tb10.v4.0218	#N/A	ESAG3, putative	ESAG	564.3	-0.7987	1.49e-11	0	0	0	1			0	0	0
Tb11.01.6240.1-p1-CDS1	Tb11.01.6240	#N/A	ESAG2, putative	ESAG	430.5	-0.9386	7.59e-15	0	0	0	1			0	0	0
Tb11.01.6241.1-p1-CDS1	Tb11.01.6241	#N/A	expression site-associated gene (ESAG) protein, putative	ESAG	407.8	-0.8945	6.29e-13	0	0	0	1			0	0	0
Tb11.01.6250	Tb11.01.6250	#N/A	ESAG11, putative	ESAG	795.9	-0.7619	7.24e-11	0	0	0	1			0	0	0
Tb11.01.6251	Tb11.01.6251	#N/A	expression site-associated gene 11 (ESAG11) protein, putative	ESAG	435.5	-0.8179	5.75e-08	0	0	0	1			0	0	0
Tb11.NT.208	Tb11.NT.208	#N/A	Noncoding RNA, putative	ncRNA	96.1	-0.6457	0.00529	0	0	0	1			0	0	0
Tb11.v5.0413.1-p1-CDS1	Tb11.v5.0413	#N/A	expression site-associated gene 9 (ESAG9) protein	ESAG	51.9	-0.7467	0.0193	0	0	0	1			0	0	0
Tb11.v5.0429.1-p1-CDS1	Tb11.v5.0429	#N/A	receptor-type adenylate cyclase GRESAG 4, putative	ESAG	1970	-0.9017	5.51e-35	0	0	0	1			0	0	0
Tb11.v5.0464.1-p1-CDS1	Tb11.v5.0464	#N/A	vesicular-fusion protein nsf, putative	Vesicular.transport	1533	-0.5919	3.21e-15	0	0	0	1			0	0	0
Tb11.v5.0468.1-p1-CDS1	Tb11.v5.0468	#N/A	alpha tubulin, putative	Cytoskeleton	29954.4	-0.742	1.6e-45	0	0	0	1			0	0	0
Tb11.v5.0469.1-p1-CDS1	Tb11.v5.0469	#N/A	beta tubulin, putative	Cytoskeleton	51184.5	-0.6748	4.95e-30	0	0	0	1			0	0	0
Tb11.v5.0526.1-p1-CDS1	Tb11.v5.0526	#N/A	DNA polymerase kappa, putative	DNA	364.8	-0.7523	5.05e-09	0	0	0	1			0	0	0
Tb11.v5.0551.1-p1-CDS1	Tb11.v5.0551	#N/A	leucine-rich repeat protein (LRRP), putative	LRRP	1332.4	-0.646	1.8e-14	0	0	0	1			0	0	0
Tb11.v5.0606.1-p1-CDS1	Tb11.v5.0606	#N/A	hypothetical protein, conserved	ZUnknown	696.5	-0.599	1.79e-09	0	0	0	1			0	0	0
Tb11.v5.0632.1-p1-CDS1	Tb11.v5.0632	#N/A	Sel1 repeat, putative	ZUnknown	229.2	-0.9011	1.13e-09	0	0	0	1			0	0	0
Tb11.v5.0659.1-p1-CDS1	Tb11.v5.0659	#N/A	MIF4G domain containing protein, putative	ZUnknown	1367.9	-0.6326	4.3e-13	0	0	0	1			0	0	0
Tb11.v5.0661.1-p1-CDS1	Tb11.v5.0661	#N/A	DNA polymerase kappa, putative	DNA	50.3	-0.8051	0.0151	0	0	0	1			0	0	0
Tb11.v5.0676.1-p1-CDS1	Tb11.v5.0676	#N/A	expression site-associated gene 2 (ESAG2) protein, putative	ESAG	354.2	-0.9504	3.74e-13	0	0	0	1			0	0	0
Tb11.v5.0677.1-p1-CDS1	Tb11.v5.0677	#N/A	expression site-associated gene 11 (ESAG11) protein, putative	ESAG	631.7	-0.7407	1.8e-08	0	0	0	1			0	0	0
Tb11.v5.0731.1-p1-CDS1	Tb11.v5.0731	#N/A	65 kDa invariant surface glycoprotein, putative	Membrane.protein	5751.2	-0.979	1.12e-27	0	0	0	1			0	0	0
Tb11.v5.0732.1-p1-CDS1	Tb11.v5.0732	#N/A	Hexokinase	Glucose.glycerol	9567	-0.8462	1.19e-21	0	0	0	1			0	0	0
Tb11.v5.0737.1-p1-CDS1	Tb11.v5.0737	#N/A	hypothetical protein, conserved	ZUnknown	250.7	-0.6116	2.38e-05	0	0	0	1			0	0	0
Tb11.v5.0744.1-p1-CDS1	Tb11.v5.0744	#N/A	phosphatidylinositol 3-kinase tor, putative	Signalling	505.2	-0.6587	2.94e-09	0	0	0	1			0	0	0
Tb11.v5.0746.1-p1-CDS1	Tb11.v5.0746	#N/A	tatD related deoxyribonuclease, putative	DNA	563.8	-0.7432	1.82e-13	0	0	0	1			0	0	0
Tb11.v5.0756.1-p1-CDS1	Tb11.v5.0756	#N/A	DNA polymerase kappa, putative	DNA	122.6	-0.7078	0.0012	0	0	0	1			0	0	0
Tb11.v5.0789.1-p1-CDS1	Tb11.v5.0789	#N/A	expression site-associated gene 2 (ESAG2) protein, putative	ESAG	304.2	-0.9686	1.36e-13	0	0	0	1			0	0	0
Tb11.v5.0792.1-p1-CDS1	Tb11.v5.0792	#N/A	DNA polymerase theta (helicase domain only), putative	DNA	845.3	-0.8191	5.53e-19	0	0	0	1			0	0	0
Tb11.v5.0821.1-p1-CDS1	Tb11.v5.0821	#N/A	receptor-type adenylate cyclase GRESAG 4, putative	ESAG	746.8	-0.7322	4.47e-16	0	0	0	1			0	0	0
Tb11.v5.0837.1-p1-CDS1	Tb11.v5.0837	#N/A	importin beta-1 subunit, putative	Nuclear.transport	1505.5	-0.9591	3.25e-38	0	0	0	1			0	0	0
Tb11.v5.0838.1-p1-CDS1	Tb11.v5.0838	#N/A	leucine-rich repeat protein (LRRP), putative	LRRP	1234.4	-0.5891	1.5e-13	0	0	0	1			0	0	0
Tb11.v5.0844.1-p1-CDS1	Tb11.v5.0844	#N/A	ATP-dependent DEAH-box RNA helicase, putative	RNA.helicase	108.8	-0.9592	5.16e-06	0	0	0	1			0	0	0
Tb11.v5.0875.1-p1-CDS1	Tb11.v5.0875	#N/A	Same as Tb927.10.1490, MKT1L	RNA.degradation	1609.5	-0.6942	1.6e-15	0	0	0	1			0	0	0
Tb11.v5.0878.1-p1-CDS1	Tb11.v5.0878	#N/A	DNA polymerase kappa, putative	DNA	205.6	-0.814	1.68e-06	0	0	0	1			0	0	0
Tb11.v5.0887.1-p1-CDS1	Tb11.v5.0887	#N/A	hypothetical protein, conserved	ZUnknown	1464.6	-0.7006	2.26e-20	0	0	0	1			0	0	0
Tb11.v5.0903.1-p1-CDS1	Tb11.v5.0903	#N/A	S-adenosylmethionine decarboxylase proenzyme, putative	Enzyme	463.5	-0.7617	1.91e-10	0	0	0	1			0	0	0
Tb11.v5.0959.1-p1-CDS1	Tb11.v5.0959	#N/A	hypothetical protein, conserved	ZUnknown	763.2	-0.664	3.5e-13	0	0	0	1			0	0	0
Tb11.v5.0960.1-p1-CDS1	Tb11.v5.0960	#N/A	tRNA-dihydrouridine synthase 4, putative	rRNA.tRNA.process	329.8	-0.722	1.04e-07	0	0	0	1			0	0	0
Tb11.v5.0965.1-p1-CDS1	Tb11.v5.0965	#N/A	ATP-dependent DEAH-box RNA helicase, putative	RNA.helicase	1302.9	-0.8366	1.11e-25	0	0	0	1			0	0	0
Tb11.v5.0968.1-p1-CDS1	Tb11.v5.0968	#N/A	hypothetical protein, conserved	ZUnknown	1473.1	-0.7318	2.43e-21	0	0	0	1			0	0	0
Tb11.v5.0969.1-p1-CDS1	Tb11.v5.0969	#N/A	hypothetical protein, conserved	ZUnknown	94.2	-0.7064	0.00544	0	0	0	1			0	0	0
Tb11.v5.1016.1-p1-CDS2	Tb11.v5.1016	#N/A	receptor-type adenylate cyclase GRESAG 4 (pseudogene), putative	ESAG	215.2	-0.63	3.33e-05	0	0	0	1			0	0	0
Tb11.v5.1026.1-p1-CDS1	Tb11.v5.1026	#N/A	procyclin-associated gene 2-like protein, putative	PAG	590.1	-0.634	2.34e-05	0	0	0	1			0	0	0
Tb11.v5.1050.1-p1-CDS1	Tb11.v5.1050	#N/A	DNA polymerase kappa, putative	DNA	233.1	-0.6923	1.93e-06	0	0	0	1			0	0	0
Tb11.v5.1056.1-p1-CDS1	Tb11.v5.1056	#N/A	DNA polymerase kappa, putative	DNA	116.7	-0.8944	7.87e-06	0	0	0	1			0	0	0
Tb11.v5.1058.1-p1-CDS1	Tb11.v5.1058	#N/A	DNA polymerase kappa, putative	DNA	297.8	-0.8147	1.22e-09	0	0	0	1			0	0	0
Tb2.NT.50	Tb2.NT.50	#N/A	Noncoding RNA, putative	ncRNA	29.8	-0.9892	0.0265	0	0	0	1			0	0	0
Tb2.NT.51	Tb2.NT.51	#N/A	Noncoding RNA, putative	ncRNA	168	-0.7919	3.52e-06	0	0	0	1			0	0	0
Tb3.NT.21	Tb3.NT.21	#N/A	Noncoding RNA, putative	ncRNA	156	-0.5999	0.0085	0	0	0	1			0	0	0
Tb3.NT.66	Tb3.NT.66	#N/A	Noncoding RNA, putative	ncRNA	158.5	-0.7015	6.3e-05	0	0	0	1			0	0	0
Tb5.NT.67	Tb5.NT.67	#N/A	Noncoding RNA, putative	ncRNA	133.5	-0.6326	0.00258	0	0	0	1			0	0	0
Tb7.NT.76	Tb7.NT.76	#N/A	Noncoding RNA, putative	ncRNA	193.5	-0.7105	5.8e-06	0	0	0	1			0	0	0
Tb8.NT.11	Tb8.NT.11	#N/A	Noncoding RNA, putative	ncRNA	5613.9	-0.7476	0.000688	0	0	0	1			0	0	0
Tb927.1.05	Tb927.1.05	Tb927.01.0005	variant surface glycoprotein (VSG), putative	VSG	0			0	0	0	0			0	0	0
Tb927.1.10	Tb927.1.10	Tb927.01.0010	hypothetical protein	ZUnknown	0.4	0.6827	NA	0	0	0	0			0	0	1
Tb927.1.20	Tb927.1.20	Tb927.01.0020	ESAG3 pseudogene	ESAG.pseudo	943.9	0.092	0.503	0	0	0	0			0	0	0
Tb927.1.30	Tb927.1.30	Tb927.01.0030	hypothetical protein	ZUnknown	0.3	-1.3529	NA	0	0	0	0			0	0	0
Tb927.1.40	Tb927.1.40	Tb927.01.0040	hypothetical protein	ZUnknown	1.9	-1.4998	0.418	0	0	0	0	-0.8577	0.79434	0	0	1
Tb927.1.60	Tb927.1.60	Tb927.01.0060	RNA polymerase (pseudogene), putative	ZUnknown	2230.6	0.1129	0.173	0	0	0	0	-0.8331	0.175128	0	0	0
Tb927.1.70	Tb927.1.70	Tb927.01.0070	retrotransposon hot spot protein 4 (RHS4), putative	RHS	316.3	-0.5654	9.77e-06	0	0	0	0	-1.1587	0.0109586	0	1	0
Tb927.1.90	Tb927.1.90	Tb927.01.0090	retrotransposon hot spot protein (RHS, pseudogene), putative	RHS	1322.3	0.3258	7.98e-05	0	0	0	0	-0.0374	0.999265	0	0	0
Tb927.1.100	Tb927.1.100	Tb927.01.0100	RNA polymerase (pseudogene), putative	ZUnknown	4738.7	0.0808	0.394	0	0	0	0	-1.1507	0.0527848	0	0	0
Tb927.1.110	Tb927.1.110	Tb927.01.0110	hypothetical protein, conserved	ZUnknown	1983.4	-0.387	0.000169	0	0	0	0	-0.7649	0.00570847	0	0	1
Tb927.1.120	Tb927.1.120	Tb927.01.0120	retrotransposon hot spot protein 4 (RHS4), putative	RHS	20998.8	-0.2513	0.000466	0	0	0	0	-0.8632	0.00618458	0	0	0
Tb927.1.180	Tb927.1.180	Tb927.01.0180	retrotransposon hot spot protein 1 (RHS1), putative	RHS	6112.3	-0.2001	0.0057	0	0	0	0	-0.3217	0.916669	0	0	0
Tb927.1.190	Tb927.1.190	Tb927.01.0190	retrotransposon hot spot protein (RHS, pseudogene)	RHS	4714	0.0741	0.545	0	0	0	0	-0.5206	0.065949	0	0	0
Tb927.1.220	Tb927.1.220	Tb927.01.0220	retrotransposon hot spot protein 1 (RHS1), putative	RHS	6499.3	-0.1963	0.00673	0	0	0	0	-0.1095	0.999265	0	0	0
Tb927.1.240	Tb927.1.240	Tb927.01.0240	retrotransposon hot spot protein (RHS, pseudogene), putative	RHS	5310.7	-0.0167	0.867	0	0	0	0	-0.8037	0.00358415	0	0	0
Tb927.1.270	Tb927.1.270	Tb927.01.0270	hypothetical protein	ZUnknown	368.3	-0.2308	0.113	0	0	0	0	-0.3215	0.857116	0	0	0
Tb927.1.275	Tb927.1.275	Tb927.01.0275	ESAG4 pseudogene	ESAG.pseudo	1120.4	-0.1961	0.0366	0	0	0	0	0.5848	0.376893	0	0	0
Tb927.1.280	Tb927.1.280	Tb927.01.0280	Protein of unknown function (DUF1181), putative	ZUnknown	67.9	-0.1092	0.758	0	0	0	0	-0.0819	0.999265	0	0	0
Tb927.1.290	Tb927.1.290	Tb927.01.0290	leucine-rich repeat protein (LRRP)	LRRP	3176	-0.5611	4.4e-13	0	0	0	0	-0.1897	0.999265	0	0	0
Tb927.1.300	Tb927.1.300	Tb927.01.0300	retrotransposon hot spot protein (RHS, pseudogene), putative	RHS	1378.2	-0.2787	0.00221	0	0	0	0	-0.6453	0.271461	0	0	0
Tb927.1.320	Tb927.1.320	Tb927.01.0320	retrotransposon hot spot protein (RHS, pseudogene), putative	RHS	1184.4	0.1822	0.136	0	0	0	0	-0.7764	0.933546	0	0	0
Tb927.1.330	Tb927.1.330	Tb927.01.0330	retrotransposon hot spot protein (RHS, pseudogene), putative	RHS	208.3	0.1977	0.285	0	0	0	0	0.1253	0.999265	0	0	0
Tb927.1.350	Tb927.1.350	Tb927.01.0350	retrotransposon hot spot protein (RHS, pseudogene), putative	RHS	791.9	-0.2906	0.00523	0	0	0	0	-0.7459	0.0222931	0	0	0
Tb927.1.370.1	Tb927.1.370	Tb927.01.0370	leucine-rich repeat protein (LRRP)	LRRP	6027.2	-0.4554	7.53e-08	0	0	0	0	-0.1889	0.999265	0	0	0
Tb927.1.370.2	Tb927.1.370	Tb927.01.0370	leucine-rich repeat protein (LRRP)	LRRP	6075	-0.4541	7.68e-08	0	0	0	0	-0.1889	0.999265	0	0	0
Tb927.1.380	Tb927.1.380	Tb927.01.0380	Protein of unknown function (DUF1181), putative	ZUnknown	501.9	-0.0919	0.523	0	0	0	0	-0.1332	0.999265	0	0	0
Tb927.1.400	Tb927.1.400	Tb927.01.0400	hypothetical protein, conserved	ZUnknown	371.1	0.2908	0.0488	0	0	0	0	-0.6215	0.560886	0	0	0
Tb927.1.410	Tb927.1.410	Tb927.01.0410	retrotransposon hot spot protein (RHS, pseudogene), putative	RHS	3308.1	0.1806	0.0222	0	0	0	0	-0.3041	0.999265	0	0	0
Tb927.1.420	Tb927.1.420	Tb927.01.0420	retrotransposon hot spot protein 5 (RHS5), putative	RHS	4448	0.0911	0.211	0	0	0	0	-0.6306	0.149271	0	0	0
Tb927.1.430	Tb927.1.430	Tb927.01.0430	retrotransposon hot spot protein (RHS, pseudogene), putative	RHS	2127	-0.1319	0.125	0	0	0	0	-0.5525	0.229828	0	0	0
Tb927.1.450	Tb927.1.450	Tb927.01.0450	retrotransposon hot spot protein (RHS, pseudogene), putative	RHS	2441.8	-0.1254	0.104	0	0	0	0	-0.4035	0.581079	0	0	0
Tb927.1.470	Tb927.1.470	Tb927.01.0470	Protein of unknown function (DUF1181), putative	ZUnknown	56.6	-0.4088	0.221	0	0	0	0	-0.1121	0.999265	0	0	0
Tb927.1.480	Tb927.1.480	Tb927.01.0480	leucine-rich repeat protein (LRRP)	LRRP	2207.8	-0.3518	0.000513	0	0	0	0	-0.2791	0.991116	0	0	0
Tb927.1.500	Tb927.1.500	Tb927.01.0500	retrotransposon hot spot protein (RHS, pseudogene), putative	RHS	1289.5	-0.4177	2.07e-06	0	0	0	0	-0.5031	0.714646	0	0	0
Tb927.1.530.1	Tb927.1.530	Tb927.01.0530	hypothetical protein, conserved	ZUnknown	447.9	0.2455	0.0992	0	0	0	0	0.0456	0.999265	0	0	0
Tb927.1.530.2	Tb927.1.530	Tb927.01.0530	hypothetical protein, conserved	ZUnknown	966.7	0.2948	0.00447	0	0	0	0	0.0456	0.999265	0	0	0
Tb927.1.540	Tb927.1.540	Tb927.01.0540	DNA-directed RNA polymerase III, putative, (RPC128)	RNA.synthesis	3212.4	-0.1937	0.00474	0	0	0	0	-0.1418	0.95615	0	0	0
Tb927.1.560	Tb927.1.560	Tb927.01.0560	WD domain, G-beta repeat, putative	ZUnknown	1343.6	0.0788	0.411	0	0	0	0	-0.0885	0.999265	0	0	1
Tb927.1.570	Tb927.1.570	Tb927.01.0570	Histone-lysine N-methyltransferase, H3 lysine-76 specific (DOT1B)	Chromatin	995.6	-0.0359	0.768	0	0	0	0	-0.1221	0.95615	0	0	1
Tb927.1.580	Tb927.1.580	Tb927.01.0580	phosphate-repressible phosphate permease, putative	Ions	1520.6	0.4549	7.55e-09	0	0	0	0	0.2835	0.483693	0	0	1
Tb927.1.600	Tb927.1.600	Tb927.01.0600	phosphate-repressible phosphate permease, putative	Ions	2184	0.1741	0.0224	0	0	0	0	0.17	0.999265	0	0	0
Tb927.1.610	Tb927.1.610	Tb927.01.0610	hypothetical protein, conserved	ZUnknown	689.8	0.0618	0.631	0	0	0	0	0.129	0.999265	0	0	1
Tb927.1.630	Tb927.1.630	Tb927.01.0630	anti-silencing protein ASF1A	Chromatin	555.9	0.2599	0.0233	0	0	0	0	0.1657	0.95615	0	0	1
Tb927.1.640	Tb927.1.640	Tb927.01.0640	BRCA2, acts in recombination, antigenic variation	DNA	5092.1	0.0634	0.417	0	0	0	0	0.0175	0.999265	0	0	0
Tb927.1.650	Tb927.1.650	Tb927.01.0650	conserved protein, unknown function	ZUnknown	511.5	0.0961	0.48	0	0	0	0	0.0674	0.999265	0	0	1
Tb927.1.670	Tb927.1.670	Tb927.01.0670	conserved protein, unknown function	ZUnknown	1855.7	0.1213	0.171	0	0	0	0	0.1141	0.999265	0	0	1
Tb927.1.690	Tb927.1.690	Tb927.01.0690	hypothetical protein, conserved	ZUnknown	786.9	0.2176	0.0298	0	0	0	0	0.0829	0.99506	0	0	1
Tb927.1.710	Tb927.1.710	Tb927.01.0710	phosphoglycerate kinase (PGKB)	Glucose.glycerol	2938.1	-0.5678	9.67e-17	0	0	0	0	-0.1662	0.999265	0	0	1
Tb927.1.720	Tb927.1.720	Tb927.01.0720	phosphoglycerate kinase (PGKA)	Glucose.glycerol	2559.4	-0.1442	0.0757	0	0	0	0	-0.0768	0.999265	0	0	0
Tb927.1.730	Tb927.1.730	Tb927.01.0730	NADH-ubiquinone oxidoreductase complex I subunit, putative	Mito.e.transport	1625.4	-0.1018	0.277	0	0	0	0	-0.5358	0.0622666	0	0	1
Tb927.1.740	Tb927.1.740	Tb927.01.0740	phosphatidylinositol-4-phosphate 5-kinase related	Mito.pathway	1420.6	0.1976	0.0493	0	0	0	0	0.2358	0.469816	0	0	1
Tb927.1.750	Tb927.1.750	Tb927.01.0750	Metal-binding domain-containing protein	ZUnknown	5486.8	-0.0036	0.968	0	0	0	0	-0.1204	0.999265	0	0	0
Tb927.1.760	Tb927.1.760	Tb927.01.0760	wd40 repeat domain-containing protein	ZUnknown	1463.5	0.129	0.141	0	0	0	0	-0.0312	0.999265	0	0	1
Tb927.1.780	Tb927.1.780	Tb927.01.0780	leucine-rich repeat-containing protein	LRRP	570.7	-0.0045	0.977	0	0	0	0	-0.1779	0.776882	0	0	1
Tb927.1.790	Tb927.1.790	Tb927.01.0790	hypothetical transmembrane protein, conserved	Mito.pathway	929.5	-0.0019	0.989	0	0	0	0	-0.1599	0.999265	0	0	1
Tb927.1.820	Tb927.1.820	Tb927.01.0820	kelch domain-containing protein	ZUnknown	1074.1	-0.0364	0.776	0	0	0	0	0.0729	0.999265	0	0	1
Tb927.1.830.2	Tb927.1.830	Tb927.01.0830	hypothetical protein, conserved	ZUnknown	378.1	-0.1271	0.367	0	0	0	0	-0.3074	0.102633	0	0	1
Tb927.1.830.1	Tb927.1.830	Tb927.01.0830	hypothetical protein, conserved	ZUnknown	1093.7	-0.0347	0.757	0	0	0	0	-0.3074	0.102633	0	0	1
Tb927.1.840	Tb927.1.840	Tb927.01.0840	transmembrane protein, putative	Mito.pathway	605.3	0.1969	0.0729	0	0	0	0	-0.0786	0.999265	0	0	1
Tb927.1.860	Tb927.1.860	Tb927.01.0860	transmembrane protein, putative	ZUnknown	2041.3	0.1983	0.0147	0	0	0	0	0.1305	0.926461	0	0	1
Tb927.1.870	Tb927.1.870	Tb927.01.0870	deoxyhypusine synthase, putative	Amino.acids	1223.5	-0.0209	0.859	0	0	0	0	0.0248	0.999265	0	0	1
Tb927.1.880	Tb927.1.880	Tb927.01.0880	MDN1 homologue. Dynein-related AAA ATPase involved in pre-60S assembly and export	rRNA.tRNA.process	16863.3	-0.347	9.25e-07	0	0	0	0	-0.1564	0.999265	0	0	1
Tb927.1.890	Tb927.1.890	Tb927.01.0890	hypothetical protein, conserved	ZUnknown	590.3	0.524	1.56e-06	0	0	0	0	0.1328	0.999265	0	0	1
Tb927.1.990	Tb927.1.990	Tb927.01.0990	Enkuring domain-containig protein	ZUnknown	1685.2	-0.0247	0.814	0	0	0	0	0.0587	0.999265	0	0	1
Tb927.1.1000	Tb927.1.1000	Tb927.01.1000	developmentally regulated phosphoprotein (dr6)	Mito.pathway	1071.5	0.1158	0.278	0	0	0	0	-0.2295	0.175554	0	0	1
Tb927.1.1010	Tb927.1.1010	Tb927.01.1010	E3 ubiquitin-protein ligase KCMF1, putative	Ubiquitin.proteasome	1084.6	0.1578	0.105	0	0	0	0	-0.0106	0.999265	0	0	1
Tb927.1.1020	Tb927.1.1020	Tb927.01.1020	leucine-rich repeat-containing protein	LRRP	641.3	0.1181	0.317	0	0	0	0	0.0304	0.999265	0	0	1
Tb927.1.1025	Tb927.1.1025	Tb927.01.1025	conserved protein, unknown function	ZUnknown	239.9	0.4567	0.00335	0	0	0	0	0.0595	0.999265	0	0	0
Tb927.1.1030	Tb927.1.1030	Tb927.01.1030	NOP49	Cell.cycle	725.2	0.294	0.00306	0	0	0	0	0.0178	0.999265	0	0	1
Tb927.1.1050	Tb927.1.1050	Tb927.01.1050	Metallo-dependent phosphatase-like domain-containing protein (ESP25)	Vesicular.transport	2076.8	-0.0863	0.316	0	0	0	0	-0.2192	0.626065	0	0	1
Tb927.1.1060	Tb927.1.1060	Tb927.01.1060	Cell cycle checkpoint protein RAD1-like, putative	Cell.cycle	349.1	0.3159	0.0202	0	0	0	0	0.1142	0.999265	0	0	1
Tb927.1.1080	Tb927.1.1080	Tb927.01.1080	TFIIH basal transcription factor subunit (TSP1)	RNA.synthesis	822.7	0.2783	0.00465	0	0	0	0	-0.0227	0.999265	0	0	1
Tb927.1.1090	Tb927.1.1090	Tb927.01.1090	hypothetical protein, unlikely	Unlikely	317.8	0.4203	0.0017	0	0	0	0	0.061	0.999265	0	0	0
Tb927.1.1100	Tb927.1.1100	Tb927.01.1100	BBP109	Cytoskeleton	1847.3	-0.0269	0.811	0	0	0	0	0.0959	0.999265	0	0	1
Tb927.1.1120	Tb927.1.1120	Tb927.01.1120	Ribosomal RNA-processing protein 8, putative (RRP8)	rRNA.tRNA.process	560.4	0.1055	0.438	0	0	0	0	-0.1408	0.989045	0	0	1
Tb927.1.1130	Tb927.1.1130	Tb927.01.1130	glycerol-3-phosphate dehydrogenase (FAD-dependent), in TAO complex	Glucose.glycerol	697.5	0.1858	0.094	0	0	0	0	0.0142	0.999265	0	0	1
Tb927.1.1140	Tb927.1.1140	Tb927.01.1140	Transmembrane protein 231, putative	ZUnknown	548.8	0.2119	0.0602	0	0	0	0	-0.0002	0.999915	0	0	1
Tb927.1.1150	Tb927.1.1150	Tb927.01.1150	zeta tubulin	Cytoskeleton	632.7	0.2386	0.0457	0	0	0	0	0.0443	0.999265	0	0	1
Tb927.1.1160	Tb927.1.1160	Tb927.01.1160	PPR3	Mito.translation	916.7	0.1491	0.134	0	0	0	0	-0.1262	0.999265	0	0	1
Tb927.1.1170	Tb927.1.1170	Tb927.01.1170	RBP12 DNA-directed RNA polymerase I subunit	RNA.synthesis	366.5	0.092	0.568	0	0	0	0	0.066	0.999265	0	0	1
Tb927.1.1175	Tb927.1.1175	Tb927.01.1175	hypothetical protein	ZUnknown	277.9	0.3223	0.0319	0	0	0	0	-0.0152	0.999265	0	0	1
Tb927.1.1200	Tb927.1.1200	Tb927.01.1200	Mitochondrial ribosomal protein S15	Mito.translation	602.3	0.1074	0.371	0	0	0	0	-0.0778	0.989252	0	0	1
Tb927.1.1210	Tb927.1.1210	Tb927.01.1210	conserved protein, unknown function	ZUnknown	222.9	0.0965	0.665	0	0	0	0	-0.1317	0.999265	0	0	1
Tb927.1.1220	Tb927.1.1220	Tb927.01.1220	RWD domain-containing protein	ZUnknown	911.2	0.0412	0.742	0	0	0	0	0.1644	0.999265	0	0	1
Tb927.1.1230	Tb927.1.1230	Tb927.01.1230	chaperone DNAj, putative, J47	Chaperone	755.1	-0.1062	0.343	0	0	0	0	0.0101	0.999265	0	0	1
Tb927.1.1240	Tb927.1.1240	Tb927.01.1240	CTP synthase	Nucleotides	1896.2	-0.332	2.38e-05	0	0	0	0	0.275	0.827396	0	0	1
Tb927.1.1270	Tb927.1.1270	Tb927.01.1270	homocysteine S-methyltransferase, putative	Amino.acids	610.1	0.1682	0.139	0	0	0	0	1.4552	4.34252e-05	1	0	1
Tb927.1.1300	Tb927.1.1300	Tb927.01.1300	hypothetical transmembrane protein, conserved	ZUnknown	310.1	0.0097	0.96	0	0	0	0	0.1294	0.999265	0	0	1
Tb927.1.1310	Tb927.1.1310	Tb927.01.1310	transmembrane protein, conserved	ZUnknown	594.3	0.1648	0.173	0	0	0	0	-0.165	0.984284	0	0	1
Tb927.1.1330	Tb927.1.1330	Tb927.01.1330	Mitochondrial Editosome-like Complex TUTase (MEAT1)	Mito.RNA	607.2	0.1507	0.192	0	0	0	0	-0.0122	0.999265	0	0	1
Tb927.1.1340	Tb927.1.1340	Tb927.01.1340	FG-GAP repeat protein, putative,intergrin alpha chain protein, putative	Cytoskeleton	1309.1	-0.0067	0.954	0	0	0	0	-0.0202	0.999265	0	0	1
Tb927.1.1350	Tb927.1.1350	Tb927.01.1350	kinesin heavy chain, Kinesin-1	Cytoskeleton	2518.4	0.3465	3.01e-07	0	0	0	0	0.3035	0.688871	0	0	1
Tb927.1.1370	Tb927.1.1370	Tb927.01.1370	rRNA biogenesis protein, putative	rRNA.tRNA.process	723.1	-0.5711	2.05e-08	0	0	0	0	-0.3252	0.65923	0	0	1
Tb927.1.1380	Tb927.1.1380	Tb927.01.1380	serine/threonine protein phosphatase 2A regulatory subunit, putative	Protein.kinase	1239.1	-0.0933	0.38	0	0	0	0	1.7481	1.14257e-06	1	0	1
Tb927.1.1390	Tb927.1.1390	Tb927.01.1390	hypothetical protein, conserved	ZUnknown	298.7	0.0253	0.895	0	0	0	0	-0.0491	0.999265	0	0	1
Tb927.1.1400	Tb927.1.1400	Tb927.01.1400	Overproducer of inositol protein 10 homolog, putative	ZUnknown	208.1	0.0265	0.91	0	0	0	0	0.2706	0.808266	0	0	1
Tb927.1.1420	Tb927.1.1420	Tb927.01.1420	conserved protein, unknown function	ZUnknown	3206.5	0.3579	1.75e-06	0	0	0	0	0.4998	0.441357	0	0	1
Tb927.1.1470	Tb927.1.1470	Tb927.01.1470	conserved protein, unknown function	ZUnknown	537.4	0.4995	3.08e-06	0	0	0	0	2.0644	4.89346e-06	1	0	1
Tb927.1.1500	Tb927.1.1500	Tb927.01.1500	conserved protein, unknown function	ZUnknown	2628.5	-0.4546	1.68e-10	0	0	0	0	3.4105	3.37383e-17	1	0	1
Tb927.1.1530	Tb927.1.1530	Tb927.01.1530	protein kinase, putative	Protein.kinase	4692.7	-0.248	0.000509	0	0	0	0	0.5268	0.574451	0	0	1
Tb927.1.1540	Tb927.1.1540	Tb927.01.1540	Tubulin/FtsZ family, putative	Cytoskeleton	1269.9	-0.4786	1.16e-08	0	0	0	0	-0.2202	0.973923	0	0	1
Tb927.1.1550	Tb927.1.1550	Tb927.01.1550	tubulin-tyrosine ligase, putative	Cytoskeleton	1600.6	-0.0703	0.46	0	0	0	0	-0.0279	0.999265	0	0	1
Tb927.1.1560	Tb927.1.1560	Tb927.01.1560	vesicular-fusion protein nsf, putative,N-ethylmaleimide sensitive factor (NsF)	Vesicular.transport	1537.5	-0.5039	1.01e-09	0	0	0	0	0.1097	0.999265	0	0	1
Tb927.1.1580	Tb927.1.1580	Tb927.01.1580	cytochrome c oxidase assembly factor, SCO1/2, putative	Mito.e.transport	557.8	0.215	0.0597	0	0	0	0	-0.2499	0.901005	0	0	1
Tb927.1.1600	Tb927.1.1600	Tb927.01.1600	pseudouridine synthase TruD, putative	rRNA.tRNA.process	2328.8	-0.4188	9.52e-09	0	0	0	0	-0.0803	0.999265	0	0	1
Tb927.1.1610	Tb927.1.1610	Tb927.01.1610	hypothetical protein, conserved	Mito.pathway	367.4	-0.2263	0.109	0	0	0	0	0.0228	0.999265	0	0	1
Tb927.1.1620	Tb927.1.1620	Tb927.01.1620	ATP-dependent DEAD/H RNA helicase, putative, no clear yeast homologue	RNA.helicase	1343.4	-0.5105	8.54e-11	0	0	0	0	-0.1828	0.965118	0	0	1
Tb927.1.1630	Tb927.1.1630	Tb927.01.1630	transcription elongation factor 1 homolog (ELOF1)	RNA.synthesis	246.9	-0.2238	0.181	0	0	0	0	-0.1224	0.966631	0	0	1
Tb927.1.1640	Tb927.1.1640	Tb927.01.1640	hypothetical protein, conserved	ZUnknown	398.3	-0.0942	0.515	0	0	0	0	-0.0066	0.999265	0	0	1
Tb927.1.1650	Tb927.1.1650	Tb927.01.1650	hypothetical protein, conserved	ZUnknown	144.4	0.224	0.281	0	0	0	0	0.0508	0.999265	0	0	0
Tb927.1.1660	Tb927.1.1660	Tb927.01.1660	ESCO acetyltransferase domain-containing protein	ZUnknown	241.1	-0.198	0.232	0	0	0	0	-0.014	0.999265	0	0	1
Tb927.1.1680	Tb927.1.1680	Tb927.01.1680	Transcription elongation factor 1 domain-containing protein	RNA.synthesis	604.9	-0.1936	0.0843	0	0	0	0	-0.1764	0.814212	0	0	1
Tb927.1.1690	Tb927.1.1690	Tb927.01.1690	RNA editing endoribonuclease (KREN1)	Mito.RNA	1712.4	-0.2293	0.00285	0	0	0	0	-0.2665	0.319731	0	0	1
Tb927.1.1700	Tb927.1.1700	Tb927.01.1700	AATF protein, putative	ZUnknown	973.4	-0.5774	9.34e-09	0	0	0	0	-0.3268	0.669197	0	0	1
Tb927.1.1710	Tb927.1.1710	Tb927.01.1710	transmembrane protein, conserved	ZUnknown	6346.7	-0.2919	3.31e-05	0	0	0	0	-0.0841	0.999265	0	0	1
Tb927.1.1720	Tb927.1.1720	Tb927.01.1720	cyclophilin 15, putative	Chaperone	905.2	-0.1048	0.355	0	0	0	0	0.0272	0.999265	0	0	1
Tb927.1.1730	Tb927.1.1730	Tb927.01.1730	conserved protein, unknown function	Mito.pathway	2119.3	-0.2512	0.000975	0	0	0	0	-0.0086	0.999265	0	0	1
Tb927.1.1740	Tb927.1.1740	Tb927.01.1740	Clathrin-associated protein	Vesicular.transport	37564.8	-0.433	2.36e-09	0	0	0	0	0.3483	0.953993	0	0	0
Tb927.1.1750	Tb927.1.1750	Tb927.01.1750	conserved protein, unknown function	ZUnknown	1032.1	-0.0167	0.889	0	0	0	0	0.2421	0.999265	0	0	1
Tb927.1.1760	Tb927.1.1760	Tb927.01.1760	hypothetical transmembrane protein	ZUnknown	309.5	-0.3958	0.0172	0	0	0	0	0.3141	0.999265	0	0	1
Tb927.1.1770	Tb927.1.1770	Tb927.01.1770	glutaredoxin GRX2	Redox	498.1	-0.1759	0.223	0	0	0	0	-0.3366	0.48089	0	0	1
Tb927.1.1790	Tb927.1.1790	Tb927.01.1790	hypothetical PIN domain-containing protein, conserved	RNA.processing	954.3	-0.0054	0.972	0	0	0	0	0.3255	0.791757	0	0	1
Tb927.1.1820	Tb927.1.1820	Tb927.01.1820	hypothetical PIN domain-containing protein	RNA.processing	1550.8	-0.291	0.000175	0	0	0	0	0.1539	0.999265	0	0	1
Tb927.1.1840	Tb927.1.1840	Tb927.01.1840	conserved protein, unknown function	ZUnknown	1260.7	-0.2796	0.00339	0	0	0	0	0.2777	0.966631	0	0	1
Tb927.1.1850	Tb927.1.1850	Tb927.01.1850	hypothetical protein, conserved	ZUnknown	833	-0.5518	1.39e-08	0	0	0	0	-0.0391	0.999265	0	0	1
Tb927.1.1920	Tb927.1.1920	Tb927.01.1920	conserved protein, unknown function	ZUnknown	756.6	-0.4506	3.79e-05	0	0	0	0	0.4798	0.0238701	0	0	1
Tb927.1.1960	Tb927.1.1960	Tb927.01.1960	chaperone DNAj, putative, J16	Chaperone	2153.9	-0.5786	6.76e-09	0	0	0	0	0.0392	0.999265	0	0	1
Tb927.1.1980	Tb927.1.1980	Tb927.01.1980	Protein transport protein yif1, putative	Vesicular.transport	935	-0.518	1.28e-07	0	0	0	0	0.0475	0.999265	0	0	1
Tb927.1.1990	Tb927.1.1990	Tb927.01.1990	Pre-mRNA-splicing factor 38, putative	RNA.processing	391.1	-0.5418	4.07e-06	0	0	0	0	0.2185	0.940587	0	0	1
Tb927.1.2040	Tb927.1.2040	Tb927.01.2040	ESAG2, putative	ESAG	424.6	-0.1711	0.202	0	0	0	0	0.2124	0.999265	0	0	0
Tb927.1.2060	Tb927.1.2060	Tb927.01.2060	ESAG11 pseudogene	ESAG.pseudo	84.3	-0.5052	0.0502	0	0	0	0			0	0	0
Tb927.1.2120	Tb927.1.2120	Tb927.01.2120	calpain, putative,cysteine peptidase, Clan CA, family C2, putative	Protease	3231.7	-0.4925	2.45e-13	0	0	0	0	0.2389	0.991116	0	0	1
Tb927.1.2160	Tb927.1.2160	Tb927.01.2160	calpain-like protein fragment, putative	Protease	419.3	0.4981	0.000211	0	0	0	0	-0.5045	0.858469	0	0	1
Tb927.1.2230	Tb927.1.2230	Tb927.01.2230	calpain-like protein fragment, putative	Protease	1668.4	-0.1828	0.094	0	0	0	0	-0.5825	0.769586	0	0	0
Tb927.1.2260	Tb927.1.2260	Tb927.01.2260	calpain-like protein fragment, putative	Protease	2314.6	0.2397	0.00467	0	0	0	0	-0.3349	0.996189	0	0	0
Tb927.1.2780	Tb927.1.2780	Tb927.01.2780	hypothetical protein	ZUnknown	98.2	-0.548	0.0227	0	0	0	0	-0.814	0.0186812	0	0	0
Tb927.1.2970	Tb927.1.2970	Tb927.01.2970	hypothetical protein, conserved	ZUnknown	722.9	0.0341	0.798	0	0	0	0	-0.1391	0.999265	0	0	1
Tb927.1.2980	Tb927.1.2980	Tb927.01.2980	hypothetical protein, conserved	ZUnknown	2755	0.1206	0.146	0	0	0	0	-0.036	0.999265	0	0	1
Tb927.1.2985	Tb927.1.2985	Tb927.01.2985	ER protein Pkr1, putative	ZUnknown	450.5	0.1312	0.319	0	0	0	0	0.0548	0.999265	0	0	1
Tb927.1.2990	Tb927.1.2990	Tb927.01.2990	PPR2	Mito.translation	3042.1	0.1759	0.0223	0	0	0	0	-0.1286	0.999265	0	0	1
Tb927.1.3000	Tb927.1.3000	Tb927.01.3000	amidohydrolase, putative	Amino.acids	1496.7	0.1139	0.212	0	0	0	0	-0.0405	0.999265	0	0	1
Tb927.1.3010	Tb927.1.3010	Tb927.01.3010	TbPAMC4, RNA editing	Mito.RNA	814.1	0.3988	2.54e-05	0	0	0	0	-0.0128	0.999265	0	0	1
Tb927.1.3030	Tb927.1.3030	Tb927.01.3030	KREL2	Mito.RNA	2062.8	0.3273	2.15e-05	0	0	0	0	0.0469	0.999265	0	0	1
Tb927.1.3040	Tb927.1.3040	Tb927.01.3040	hypothetical protein, conserved	ZUnknown	683.3	0.2907	0.00478	0	0	0	0	-0.0902	0.999265	0	0	1
Tb927.1.3050	Tb927.1.3050	Tb927.01.3050	tRNA (Uracil-5-)-methyltransferase, putative	ZUnknown	1984.5	-0.0751	0.411	0	0	0	0	-0.1285	0.933011	0	0	1
Tb927.1.3070	Tb927.1.3070	Tb927.01.3070	hypothetical protein, conserved, poly(Q), poly(H)	ZUnknown	2125.1	0.1094	0.257	0	0	0	0	-0.0798	0.999265	0	0	1
Tb927.1.3110	Tb927.1.3110	Tb927.01.3110	soluble N-ethylmaleimide sensitive factor (NSF) attachment protein, putative	Vesicular.transport	1311.5	0.2927	0.000579	0	0	0	0	-0.0454	0.999265	0	0	1
Tb927.1.3120	Tb927.1.3120	Tb927.01.3120	separase, putative,cysteine peptidase, Clan CD, family C50, putative	DNA	1391.3	0.1932	0.0312	0	0	0	0	0.1293	0.999265	0	0	1
Tb927.1.3130	Tb927.1.3130	Tb927.01.3130	AGC/RSK family serine/threonine kinase, putative	Protein.kinase	1410.2	0.1349	0.195	0	0	0	0	0.1899	0.832139	0	0	1
Tb927.1.3150	Tb927.1.3150	Tb927.01.3150	hypothetical protein, conserved	ZUnknown	1409.3	0.3317	3.97e-05	0	0	0	0	0.1635	0.460656	0	0	1
Tb927.1.3170	Tb927.1.3170	Tb927.01.3170	CHORD domain - Zn binding domain	ZUnknown	1289.9	0.1856	0.0536	0	0	0	0	-0.0984	0.999265	0	0	1
Tb927.1.3180	Tb927.1.3180	Tb927.01.3180	40S ribosomal protein S11	Ribosome	8650.9	0.0524	0.593	0	0	0	0	-0.2318	0.995008	0	0	1
Tb927.1.3200	Tb927.1.3200	Tb927.01.3200	SGT1-like protein, cold-shock domain	Chaperone	1611.8	0.5456	4.62e-11	0	0	0	0	0.5449	0.0457639	0	0	1
Tb927.1.3220	Tb927.1.3220	Tb927.01.3220	TBC-M likely GAP	Signalling	1521.4	0.2089	0.00907	0	0	0	0	0.0348	0.999265	0	0	1
Tb927.1.3230	Tb927.1.3230	Tb927.01.3230	cell division cycle protein, putative	Cell.cycle	1746.8	0.2106	0.0261	0	0	0	0	0.0058	0.999265	0	0	1
Tb927.1.3250	Tb927.1.3250	Tb927.01.3250	hypothetical protein, myosin heavy-chain like	Cytoskeleton	5914.1	0.0195	0.851	0	0	0	0	0.1177	0.999265	0	0	1
Tb927.1.3260	Tb927.1.3260	Tb927.01.3260	hypothetical protein, conserved	ZUnknown	8058.8	-0.0127	0.894	0	0	0	0	0.0089	0.999265	0	0	1
Tb927.1.3270	Tb927.1.3270	Tb927.01.3270	hypothetical protein, conserved	ZUnknown	3192.7	0.1924	0.012	0	0	0	0	0.03	0.999265	0	0	1
Tb927.1.3280	Tb927.1.3280	Tb927.01.3280	septum formation protein MAF homologue, putative	ZUnknown	755.1	0.2589	0.0192	0	0	0	0	0.0354	0.999265	0	0	1
Tb927.1.3290	Tb927.1.3290	Tb927.01.3290	hypothetical protein, conserved	ZUnknown	3499.4	0.2971	1.44e-05	0	0	0	0	-0.0488	0.999265	0	0	1
Tb927.1.3300	Tb927.1.3300	Tb927.01.3300	myotubularin, putative,zinc-binding phosphatase, putative	Cytoskeleton	3416.6	0.0093	0.923	0	0	0	0	0.0339	0.999265	0	0	1
Tb927.1.3310	Tb927.1.3310	Tb927.01.3310	hypothetical protein, conserved, no human or yeast homologue	ZUnknown	1753	0.1103	0.238	0	0	0	0	0.164	0.999265	0	0	1
Tb927.1.3320	Tb927.1.3320	Tb927.01.3320	leucine-rich repeat protein (LRRP)	LRRP	382.4	0.1165	0.411	0	0	0	0	0.3082	0.878827	0	0	1
Tb927.1.3390	Tb927.1.3390	Tb927.01.3390	Eukaryotic protein of unknown function (DUF866), putative	ZUnknown	928.8	0.1323	0.291	0	0	0	0	-0.4466	0.0664766	0	0	1
Tb927.1.3400	Tb927.1.3400	Tb927.01.3400	hypothetical protein, conserved	ZUnknown	890.6	-0.3447	0.000218	0	0	0	0	-0.6117	0.00502024	0	0	1
Tb927.1.3410.2	Tb927.1.3410	Tb927.01.3410	hypothetical protein, conserved	ZUnknown	824.7	-0.494	6.28e-08	0	0	0	0	-0.7372	0.000435611	0	0	1
Tb927.1.3410.1	Tb927.1.3410	Tb927.01.3410	hypothetical protein, conserved	ZUnknown	790.5	-0.4763	1.86e-07	0	0	0	0	-0.7372	0.000435611	0	0	1
Tb927.1.3560	Tb927.1.3560	Tb927.01.3560	MAP2 microtubulue associated protein	Cytoskeleton	2241.8	-0.0974	0.25	0	0	0	0	0.1068	0.999265	0	0	1
Tb927.1.3670	Tb927.1.3670	Tb927.01.3670	ESAG8, putative	ESAG	1004.3	0.2481	0.00578	0	0	0	0	0.0581	0.999265	0	0	1
Tb927.1.3750	Tb927.1.3750	Tb927.01.3750	hypothetical protein, conserved	ZUnknown	9.7	-0.5445	0.506	0	0	0	0	0.6507	0.980934	0	0	0
Tb927.1.3760	Tb927.1.3760	Tb927.01.3760	hypothetical protein, conserved	ZUnknown	48.8	0.0172	0.968	0	0	0	0	-0.4588	0.999265	0	0	0
Tb927.1.3800	Tb927.1.3800	Tb927.01.3800	POMP18	Mito.membrane	227.7	-0.387	0.0247	0	0	0	0	-0.8325	3.70414e-05	0	0	1
Tb927.1.3810	Tb927.1.3810	Tb927.01.3810	hypothetical protein, conserved	ZUnknown	474.6	0.1086	0.419	0	0	0	0	-0.094	0.999265	0	0	1
Tb927.1.3820	Tb927.1.3820	Tb927.01.3820	ATP synthase subunit, putative	Mito.e.transport	1116.7	0.1303	0.223	0	0	0	0	0.1306	0.999265	0	0	1
Tb927.1.3840	Tb927.1.3840	Tb927.01.3840	hypothetical protein, conserved	ZUnknown	1346.2	0.1649	0.0667	0	0	0	0	0.0431	0.999265	0	0	1
Tb927.1.3850	Tb927.1.3850	Tb927.01.3850	Sec61 beta family and TM domain	Vesicular.transport	2244.8	-0.1111	0.249	0	0	0	0	0.3145	0.464541	0	0	1
Tb927.1.3860	Tb927.1.3860	Tb927.01.3860	hypothetical protein, conserved	ZUnknown	3057.6	0.2479	0.000537	0	0	0	0	0.038	0.999265	0	0	1
Tb927.1.3880	Tb927.1.3880	Tb927.01.3880	Fusaric acid resistance protein-like, putative	ZUnknown	7078.3	0.2236	0.000626	0	0	0	0	0.3999	0.861963	0	0	1
Tb927.1.3890	Tb927.1.3890	Tb927.01.3890	hypothetical protein	ZUnknown	604.1	0.0588	0.72	0	0	0	0	0.183	0.999265	0	0	1
Tb927.1.3910	Tb927.1.3910	Tb927.01.3910	Anaphase promoting complex subunit CDC23	Cell.cycle	3126.9	0.0781	0.393	0	0	0	0	-0.0072	0.999265	0	0	1
Tb927.1.3940	Tb927.1.3940	Tb927.01.3940	hypothetical protein, conserved	ZUnknown	3116	0.1288	0.14	0	0	0	0	-0.0593	0.999265	0	0	1
Tb927.1.3950	Tb927.1.3950	Tb927.01.3950	D-alanine aminotransferase (ALAT)	Mito.pathway	5671.3	-0.1525	0.109	0	0	0	0	0.5098	0.562832	0	0	1
Tb927.1.4010	Tb927.1.4010	Tb927.01.4010	TbPRI2, primase 2, kDNA replication	Mito.DNA	4362.2	0.2867	0.000101	0	0	0	0	0.8916	0.0583768	0	0	1
Tb927.1.4020	Tb927.1.4020	Tb927.01.4020	hypothetical protein	ZUnknown	828	0.4236	6.6e-06	0	0	0	0	0.8656	0.127152	0	0	1
Tb927.1.4040	Tb927.1.4040	Tb927.01.4040	hypothetical protein, conserved	ZUnknown	1364	0.2382	0.0143	0	0	0	0	0.3897	0.827396	0	0	1
Tb927.1.4050	Tb927.1.4050	Tb927.01.4050	ser/thr protein phosphatase with EF-Hand domains (PPEF)	Protein.phosphatase	4091.8	-0.2362	0.000174	0	0	0	0	-0.0015	0.999915	0	0	1
Tb927.1.4140	Tb927.1.4140	Tb927.01.4140	Protein of unknown function (DUF1448), putative	ZUnknown	397.3	-0.059	0.709	0	0	0	0	0.0511	0.999265	0	0	1
Tb927.1.4160	Tb927.1.4160	Tb927.01.4160	hypothetical protein, conserved	ZUnknown	704.2	0.2575	0.0149	0	0	0	0	0.0468	0.999265	0	0	1
Tb927.1.4180	Tb927.1.4180	Tb927.01.4180	leucine-rich repeat protein (LRRP)	LRRP	2520.9	-0.0621	0.504	0	0	0	0	0.0192	0.999265	0	0	1
Tb927.1.4220.2	Tb927.1.4220	Tb927.01.4220	Ydr279p,RNaseH2 domain like,Winged Helix DNA binding	RNA.degradation	1372.3	0.2086	0.0201	0	0	0	0	0.2048	0.440644	0	0	1
Tb927.1.4220.1	Tb927.1.4220	Tb927.01.4220	Ydr279p,RNaseH2 domain like,Winged Helix DNA binding	RNA.degradation	1356.1	0.2146	0.0173	0	0	0	0	0.2048	0.440644	0	0	1
Tb927.1.4230	Tb927.1.4230	Tb927.01.4230	hypothetical protein, conserved	Mito.pathway	1528.2	0.3801	2.04e-05	0	0	0	0	0.3762	0.0678096	0	0	1
Tb927.1.4250	Tb927.1.4250	Tb927.01.4250	hypothetical protein, conserved	ZUnknown	1357.4	-0.0431	0.672	0	0	0	0	-0.009	0.999265	0	0	1
Tb927.1.4280	Tb927.1.4280	Tb927.01.4280	hypothetical protein, conserved, African tryp specific, PTZ (tail-specific protease) domain	ZUnknown	2817.5	0.2144	0.0065	0	0	0	0	1.3405	0.00011745	1	0	1
Tb927.1.4300	Tb927.1.4300	Tb927.01.4300	chaperone DNAj, putative, J17	Chaperone	1715.1	0.4559	2.35e-10	0	0	0	0	0.8679	0.0394873	0	0	1
Tb927.1.4310	Tb927.1.4310	Tb927.01.4310	FAZ2 flagellar attachment zone protein	Cytoskeleton	14060.3	-0.3808	1.79e-07	0	0	0	0	-0.1899	0.999265	0	0	1
Tb927.1.4340	Tb927.1.4340	Tb927.01.4340	hypothetical protein, conserved	ZUnknown	2142.2	-0.0623	0.503	0	0	0	0	0.4822	0.219012	0	0	1
Tb927.1.4370	Tb927.1.4370	Tb927.01.4370	Putative integral membrane protein conserved region (DUF2404), putative	ZUnknown	2323	-0.017	0.871	0	0	0	0	0.1163	0.969702	0	0	1
Tb927.1.4380	Tb927.1.4380	Tb927.01.4380	Putative integral membrane protein conserved region (DUF2404), putative	ZUnknown	1551.6	0.0414	0.676	0	0	0	0	0.0236	0.999265	0	0	1
Tb927.1.4400	Tb927.1.4400	Tb927.01.4400	hypothetical protein, conserved	ZUnknown	969.7	0.2998	0.00191	0	0	0	0	0.3178	0.568267	0	0	1
Tb927.1.4410	Tb927.1.4410	Tb927.01.4410	hypothetical protein, conserved	ZUnknown	1882.6	-0.0203	0.898	0	0	0	0	0.087	0.999265	0	0	1
Tb927.1.4420	Tb927.1.4420	Tb927.01.4420	ABC transporter, putative	Transporter	2016.3	0.4672	1.03e-10	0	0	0	0	-0.0738	0.999265	0	0	1
Tb927.1.4450	Tb927.1.4450	Tb927.01.4450	Ion channel/Calcium-activated BK potassium channel alpha subunit, putative	ZUnknown	3078.6	0.0789	0.342	0	0	0	0	-0.0259	0.999265	0	0	1
Tb927.1.4470	Tb927.1.4470	Tb927.01.4470	hypothetical protein, conserved	ZUnknown	1089.1	-0.0248	0.842	0	0	0	0	-0.1519	0.999265	0	0	1
Tb927.1.4480	Tb927.1.4480	Tb927.01.4480	WD repeat and HMG-box DNA-binding protein, putative	ZUnknown	4272.7	-0.1011	0.178	0	0	0	0	0.2231	0.99506	0	0	1
Tb927.1.4490	Tb927.1.4490	Tb927.01.4490	acetyltransferase, putative	Lipids	1308.9	-0.2769	0.0021	0	0	0	0	1.1703	0.0310223	1	0	1
Tb927.1.4500	Tb927.1.4500	Tb927.01.4500	SNARE associated Golgi protein, putative	ZUnknown	1787.6	0.1328	0.121	0	0	0	0	-0.0051	0.999265	0	0	1
Tb927.1.4520	Tb927.1.4520	Tb927.01.4520	Zinc finger, C3HC4 type (RING finger), putative	Zinc.finger	2031.9	-0.0968	0.293	0	0	0	0	0.2286	0.982728	0	0	1
Tb927.1.4540	Tb927.1.4540	Tb927.01.4540	cyclin-like F-box protein (CFB1A)	Ubiquitin.proteasome	1034.4	0.5072	4.65e-09	0	0	0	0	0.6859	0.0190971	0	0	1
Tb927.1.4560	Tb927.1.4560	Tb927.01.4560	cyclin-like F-box protein (CFB1B)	Ubiquitin.proteasome	1233.6	0.4816	3.04e-08	0	0	0	0	0.7414	0.412434	0	0	0
Tb927.1.4580	Tb927.1.4580	Tb927.01.4580	cyclin-like F-box protein (CFB1C)	Ubiquitin.proteasome	892.1	0.3932	8.99e-05	0	0	0	0			0	0	0
Tb927.1.4600	Tb927.1.4600	Tb927.01.4600	cyclin-like F-box protein (CFB1D)	Ubiquitin.proteasome	1333.9	0.5752	4.13e-14	0	0	0	0	0.7927	0.370918	0	0	0
Tb927.1.4630	Tb927.1.4630	Tb927.01.4630	cyclin-like F-box protein (CFB1E)	Ubiquitin.proteasome	1123.6	0.461	3.01e-08	0	0	0	0	0.9088	0.560886	0	0	0
Tb927.1.4680	Tb927.1.4680	Tb927.01.4680	KKIP6 Kinetochore interacting protein 6	Cell.cycle	762.1	-0.1771	0.213	0	0	0	0	0.0107	0.999265	0	0	1
Tb927.1.4690	Tb927.1.4690	Tb927.01.4690	arginine N-methyltransferase (PRMT1)	Arg.methylation	2279.8	-0.4488	5.73e-10	0	0	0	0	-0.1732	0.897384	0	0	1
Tb927.1.4700	Tb927.1.4700	Tb927.01.4700	hypothetical protein, conserved	ZUnknown	853.3	0.545	1.76e-09	0	0	0	0	0.1973	0.600329	0	0	1
Tb927.1.4710	Tb927.1.4710	Tb927.01.4710	hypothetical protein, conserved	ZUnknown	435	-0.0445	0.779	0	0	0	0	-0.0559	0.999265	0	0	1
Tb927.1.4720	Tb927.1.4720	Tb927.01.4720	SET domain containing protein, putative	ZUnknown	1988.6	-0.0146	0.89	0	0	0	0	-0.0125	0.999265	0	0	1
Tb927.1.4730	Tb927.1.4730	Tb927.01.4730	Ribonuclease H2 non-catalytic subunit (Ylr154p-like), putative	ZUnknown	529.3	0.013	0.931	0	0	0	0	0.0199	0.999265	0	0	1
Tb927.1.4740	Tb927.1.4740	Tb927.01.4740	FAM91 N-terminus/FAM91 C-terminus, putative	ZUnknown	3407.8	0.1888	0.00751	0	0	0	0	0.3128	0.901518	0	0	1
Tb927.1.4760	Tb927.1.4760	Tb927.01.4760	Vacuolar sorting protein 39 domain 1/Vacuolar sorting protein 39 domain 2, putative	ZUnknown	3149.7	0.0803	0.318	0	0	0	0	-0.0001	0.999915	0	0	1
Tb927.1.4780	Tb927.1.4780	Tb927.01.4780	Alpha/beta hydrolase domain-containing protein	Protease	1500.2	0.2119	0.00734	0	0	0	0	-0.1314	0.999265	0	0	1
Tb927.1.4800	Tb927.1.4800	Tb927.01.4800	hypothetical protein, conserved	ZUnknown	840.5	0.279	0.00368	0	0	0	0	0.0656	0.999265	0	0	1
Tb927.1.4830	Tb927.1.4830	Tb927.01.4830	Phospholipase A1	Lipids	1775	0.3221	0.000779	0	0	0	0	0.1596	0.999265	0	0	1
Tb927.1.4860	Tb927.1.4860	Tb927.01.4860	ESAG11 pseudogene	ESAG.pseudo	208.4	-0.3389	0.0461	0	0	0	0	0.1915	0.999265	0	0	0
Tb927.1.4870	Tb927.1.4870	Tb927.01.4870	ESAG1, putative	ESAG	1055.6	-0.0608	0.622	0	0	0	0	1.337	0.999265	0	0	0
Tb927.1.4890	Tb927.1.4890	Tb927.01.4890	ESAG2, putative	ESAG	1474	-0.2974	0.00123	0	0	0	0	-1.3497	0.999265	0	0	0
Tb927.1.4900	Tb927.1.4900	Tb927.01.4900	ESAG11, putative	ESAG	3718	-0.167	0.0499	0	0	0	0	-0.0621	0.999265	0	0	0
Tb927.1.4910	Tb927.1.4910	Tb927.01.4910	ESAG1, putative	ESAG	1080	-0.3592	7.12e-05	0	0	0	0	-0.332	0.999265	0	0	0
Tb927.1.4920	Tb927.1.4920	Tb927.01.4920	hypothetical protein	ZUnknown	213.8	0.112	0.55	0	0	0	0	0.3387	0.999265	0	0	0
Tb927.1.4970	Tb927.1.4970	Tb927.01.4970	hypothetical protein	ZUnknown	87	0.0616	0.847	0	0	0	0	-0.2116	0.982232	0	0	1
Tb927.1.5000	Tb927.1.5000	Tb927.01.5000	hypothetical protein, conserved, possibly mitochondrial, no yeast or human match	Mito.pathway	851.1	0.2284	0.0394	0	0	0	0	-0.0024	0.999443	0	0	1
Tb927.1.5030	Tb927.1.5030	Tb927.01.5030	leucine-rich repeat protein (LRRP)	LRRP	1558.9	-0.0313	0.781	0	0	0	0	0.0955	0.95615	0	0	1
Tb927.1.5060	Tb927.1.5060	Tb927.01.5060	variant surface glycoprotein (VSG)-related, putative	VSG	959	-0.5659	2.47e-05	0	0	0	0	-0.6369	0.999265	0	0	0
Tb927.1.5080	Tb927.1.5080	Tb927.01.5080	ESAG9, putative	ESAG	368.5	-0.1651	0.294	0	0	0	0	-1.5774	0.99506	0	0	1
Tb927.1.5090	Tb927.1.5090	Tb927.01.5090	ESAG1 pseudogene	ESAG.pseudo	152.2	0.044	0.862	0	0	0	0			0	0	0
Tb927.1.5100	Tb927.1.5100	Tb927.01.5100	ESAG2, putative	ESAG	2586	-0.4687	6.32e-09	0	0	0	0	-0.3015	0.999265	0	0	0
Tb927.1.5110	Tb927.1.5110	Tb927.01.5110	ESAG11, putative	ESAG	1529.2	-0.1085	0.249	0	0	0	0	-0.1361	0.999265	0	0	0
Tb927.1.5120	Tb927.1.5120	Tb927.01.5120	ESAG1, putative	ESAG	824	-0.5661	1.96e-09	0	0	0	0	-0.5438	0.999265	0	0	0
Tb927.1.5150	Tb927.1.5150	Tb927.01.5150	hypothetical protein	ZUnknown	71	-0.5674	0.0418	0	0	0	0	0.9958	0.67494	0	0	0
Tb927.1.5160	Tb927.1.5160	Tb927.01.5160	hypothetical protein	ZUnknown	231.8	-0.493	0.000908	0	0	0	0			0	0	1
Tb927.1.5200	Tb927.1.5200	Tb927.01.5200	ESAG1, putative	ESAG	462.6	-0.3471	0.00843	0	0	0	0			0	0	0
Tb927.1.5220	Tb927.1.5220	Tb927.01.5220	ESAG9, putative	ESAG	0			0	0	0	0			0	0	1
Tb927.1.5235	Tb927.1.5235	Tb927.01.5235	ESAG1 pseudogene	ESAG.pseudo	0			0	0	0	0			0	0	0
Tb927.1.5240	Tb927.1.5240	Tb927.01.5240	ESAG1, putative	ESAG	180.8	-0.0098	0.968	0	0	0	0			0	0	0
Tb927.1.5250	Tb927.1.5250	Tb927.01.5250	hypothetical protein	ZUnknown	20.5	-0.3273	0.573	0	0	0	0			0	0	1
Tb927.1.5260	Tb927.1.5260	Tb927.01.5260	hypothetical protein	ZUnknown	36.5	-0.428	0.347	0	0	0	0			0	0	1
Tb927.1.5280	Tb927.1.5280	Tb927.01.5280	ESAG3 pseudogene	ESAG.pseudo	3.6	-2.3463	0.0916	0	0	0	0			0	0	0
Tb927.1.5300	Tb927.1.5300	Tb927.01.5300	variant surface glycoprotein (VSG), putative	VSG	0			0	0	0	0			0	0	0
Tb927.1.5320	Tb927.1.5320	Tb927.01.5320	VSG pseudogene	VSG	1	-2.5258	NA	0	0	0	0			0	0	0
Tb927.1.5330	Tb927.1.5330	Tb927.01.5330	variant surface glycoprotein (VSG, atypical), putative	VSG	0			0	0	0	0			0	0	0
Tb927.1.5340	Tb927.1.5340	Tb927.01.5340	ESAG3 pseudogene	ESAG.pseudo	170	-0.1525	0.624	0	0	0	0			0	0	0
Tb927.2.100	Tb927.2.100	Tb927.02.0100	retrotransposon hot spot protein 1 (RHS1), putative	RHS	10323.6	-0.307	3.55e-05	0	0	0	0	-0.3102	0.95615	0	0	0
Tb927.2.160	Tb927.2.160	Tb927.02.0160	Protein of unknown function (DUF1181), putative	ZUnknown	41.5	-0.3377	0.384	0	0	0	0	-0.2961	0.999265	0	0	0
Tb927.2.170	Tb927.2.170	Tb927.02.0170	leucine-rich repeat protein (LRRP)	LRRP	3176.5	-0.5443	6.69e-11	0	0	0	0	-0.1558	0.999265	0	0	0
Tb927.2.220	Tb927.2.220	Tb927.02.0220	retrotransposon hot spot protein (RHS2, pseudogene), putative	RHS	629.1	0.0817	0.608	0	0	0	0	-0.4956	0.485685	0	0	0
Tb927.2.240	Tb927.2.240	Tb927.02.0240	retrotransposon hot spot protein 5 (RHS5), putative	RHS	1270.3	-0.0764	0.502	0	0	0	0	-0.7668	0.151786	0	0	0
Tb927.2.270	Tb927.2.270	Tb927.02.0270	retrotransposon hot spot protein (RHS3, pseudogene), putative	RHS	1400.2	0.3113	0.000135	0	0	0	0	-0.6508	0.154956	0	0	0
Tb927.2.280	Tb927.2.280	Tb927.02.0280	retrotransposon hot spot protein 2 (RHS2), putative	RHS	3426.2	0.0966	0.236	0	0	0	0	-0.7761	0.00341443	0	0	0
Tb927.2.300	Tb927.2.300	Tb927.02.0300	DNA-directed RNA polymerase, pseudogene	Pseudogene	1315.4	0.2335	0.0132	0	0	0	0	-0.3335	0.676578	0	0	0
Tb927.2.340	Tb927.2.340	Tb927.02.0340	retrotransposon hot spot protein 4 (RHS4), putative	RHS	15797.4	-0.2068	0.00446	0	0	0	0	-0.6801	0.0884107	0	0	0
Tb927.2.370	Tb927.2.370	Tb927.02.0370	retrotransposon hot spot protein 1 (RHS1), putative	RHS	6410.8	-0.2091	0.00481	0	0	0	0	-0.5014	0.554949	0	0	0
Tb927.2.380	Tb927.2.380	Tb927.02.0380	retrotransposon hot spot protein 2 (RHS2), putative	RHS	4716.3	0.0772	0.395	0	0	0	0	-0.8233	0.00549893	0	0	0
Tb927.2.400	Tb927.2.400	Tb927.02.0400	retrotransposon hot spot protein 2 (RHS2), putative	RHS	2494.2	0.0571	0.583	0	0	0	0	-0.2333	0.914612	0	0	0
Tb927.2.420	Tb927.2.420	Tb927.02.0420	DNA-directed RNA polymerase, pseudogene	Pseudogene	1452.6	0.1843	0.0556	0	0	0	0	-0.7	0.271461	0	0	0
Tb927.2.450	Tb927.2.450	Tb927.02.0450	retrotransposon hot spot protein 4 (RHS4), putative	RHS	12310.9	-0.1898	0.012	0	0	0	0	-0.7087	0.0254078	0	0	0
Tb927.2.460	Tb927.2.460	Tb927.02.0460	DNA-directed RNA polymerase, pseudogene	Pseudogene	4198.5	0.1702	0.059	0	0	0	0	-0.6517	0.380599	0	0	0
Tb927.2.470	Tb927.2.470	Tb927.02.0470	retrotransposon hot spot protein 4 (RHS4), putative	RHS	7423.3	-0.2397	0.00151	0	0	0	0	-0.8388	0.0238914	0	0	0
Tb927.2.480	Tb927.2.480	Tb927.02.0480	retrotransposon hot spot protein (RHS2, pseudogene), putative	RHS	2377.7	-0.0335	0.748	0	0	0	0	-0.7716	0.015034	0	0	0
Tb927.2.490	Tb927.2.490	Tb927.02.0490	DNA-directed RNA polymerase, pseudogene	Pseudogene	1509	0.1683	0.115	0	0	0	0	-0.8099	0.137259	0	0	0
Tb927.2.510	Tb927.2.510	Tb927.02.0510	retrotransposon hot spot protein 4 (RHS4), putative	RHS	2069.2	-0.1214	0.228	0	0	0	0	-1.4016	5.68825e-05	0	1	0
Tb927.2.540	Tb927.2.540	Tb927.02.0540	DNA-directed RNA polymerase, pseudogene, putative,DNA-directed RNA polymerase, degenerate	Pseudogene	1820.9	0.0956	0.364	0	0	0	0	-0.7638	0.276943	0	0	0
Tb927.2.560	Tb927.2.560	Tb927.02.0560	retrotransposon hot spot protein 4 (RHS4), putative	RHS	5482.7	-0.0028	0.98	0	0	0	0	-0.1278	0.999265	0	0	0
Tb927.2.650	Tb927.2.650	Tb927.02.0650	hypothetical protein	ZUnknown	946.9	-0.1744	0.152	0	0	0	0	-0.4185	0.824303	0	0	0
Tb927.2.660	Tb927.2.660	Tb927.02.0660	ESAG4 pseudogene	ESAG.pseudo	1275	-0.0534	0.642	0	0	0	0	0.0252	0.999265	0	0	0
Tb927.2.680	Tb927.2.680	Tb927.02.0680	Protein of unknown function (DUF1181), putative	ZUnknown	86.3	-0.1012	0.743	0	0	0	0	0.0833	0.999265	0	0	0
Tb927.2.690	Tb927.2.690	Tb927.02.0690	leucine-rich repeat protein (LRRP)	LRRP	1812.5	-0.5103	3.35e-11	0	0	0	0	-0.4843	0.676578	0	0	0
Tb927.2.720	Tb927.2.720	Tb927.02.0720	retrotransposon hot spot protein (RHS5, pseudogene), putative	RHS	130.6	-0.1387	0.6	0	0	0	0	0.2669	0.999265	0	0	0
Tb927.2.820	Tb927.2.820	Tb927.02.0820	retrotransposon hot spot protein (RHS1, pseudogene), putative	RHS	8688.1	-0.2137	0.0011	0	0	0	0	-0.5584	0.309337	0	0	0
Tb927.2.830	Tb927.2.830	Tb927.02.0830	retrotransposon hot spot protein (RHS1, pseudogene), putative	RHS	1515.9	-0.0725	0.532	0	0	0	0	-0.4321	0.647351	0	0	0
Tb927.2.900	Tb927.2.900	Tb927.02.0900	hypothetical protein	ZUnknown	610.2	-0.1402	0.265	0	0	0	0	-0.2751	0.809319	0	0	0
Tb927.2.910	Tb927.2.910	Tb927.02.0910	ESAG4 pseudogene	ESAG.pseudo	1615.5	-0.1385	0.14	0	0	0	0	1.2015	0.0339629	1	0	0
Tb927.2.940	Tb927.2.940	Tb927.02.0940	Protein of unknown function (DUF1181), putative	ZUnknown	79.8	-0.134	0.674	0	0	0	0	-0.0757	0.999265	0	0	0
Tb927.2.950	Tb927.2.950	Tb927.02.0950	paraflagellar rod protein PFC13	Cytoskeleton	2050.7	-0.517	6.81e-10	0	0	0	0	-0.0977	0.999265	0	0	1
Tb927.2.980	Tb927.2.980	Tb927.02.0980	retrotransposon hot spot protein (RHS5, pseudogene), putative	RHS	273.9	-0.5833	0.000159	0	0	0	0	-0.2312	0.999265	0	0	0
Tb927.2.1050	Tb927.2.1050	Tb927.02.1050	retrotransposon hot spot protein (RHS1, pseudogene), putative	RHS	2319.9	-0.1582	0.0411	0	0	0	0	-0.1234	0.999265	0	0	0
Tb927.2.1060	Tb927.2.1060	Tb927.02.1060	retrotransposon hot spot protein (RHS1, pseudogene), putative	RHS	31.3	-0.5775	0.164	0	0	0	0	-2.4855	0.491012	0	0	0
Tb927.2.1080	Tb927.2.1080	Tb927.02.1080	retrotransposon hot spot protein 5 (RHS5), putative	RHS	1460.2	-0.0217	0.855	0	0	0	0	-0.6806	0.00390845	0	0	0
Tb927.2.1100	Tb927.2.1100	Tb927.02.1100	retrotransposon hot spot protein (RHS3, pseudogene), putative	RHS	1167.8	0.4594	1.89e-07	0	0	0	0	-0.3693	0.965118	0	0	0
Tb927.2.1110	Tb927.2.1110	Tb927.02.1110	DNA-directed RNA polymerase III, pseudogene	Pseudogene	1153.2	0.1961	0.0474	0	0	0	0	-0.7059	0.216076	0	0	0
Tb927.2.1120	Tb927.2.1120	Tb927.02.1120	retrotransposon hot spot protein (RHS4, pseudogene), putative	RHS	1817.5	-0.3286	0.00151	0	0	0	0	-0.7417	0.0136977	0	0	0
Tb927.2.1130	Tb927.2.1130	Tb927.02.1130	retrotransposon hot spot protein (RHS3, pseudogene), putative	RHS	612.9	0.5486	3.75e-06	0	0	0	0	-0.0584	0.999265	0	0	0
Tb927.2.1140	Tb927.2.1140	Tb927.02.1140	retrotransposon hot spot protein (RHS3, pseudogene), putative	RHS	1026.9	0.159	0.172	0	0	0	0	-0.3054	0.965118	0	0	0
Tb927.2.1150	Tb927.2.1150	Tb927.02.1150	retrotransposon hot spot protein (RHS2, pseudogene), putative	RHS	702.5	-0.0591	0.678	0	0	0	0	-0.9573	1.31783e-07	0	0	0
Tb927.2.1160	Tb927.2.1160	Tb927.02.1160	retrotransposon hot spot protein (RHS2, pseudogene), putative	RHS	343	-0.3223	0.0245	0	0	0	0	-0.5353	0.578514	0	0	0
Tb927.2.1170	Tb927.2.1170	Tb927.02.1170	retrotransposon hot spot protein 5 (RHS5), putative	RHS	772.7	-0.1452	0.198	0	0	0	0	-0.977	0.0236128	0	0	0
Tb927.2.1180	Tb927.2.1180	Tb927.02.1180	retrotransposon hot spot protein 3 (RHS3), putative	RHS	2044	0.3175	6.11e-05	0	0	0	0	-0.2638	0.997841	0	0	0
Tb927.2.1200	Tb927.2.1200	Tb927.02.1200	DNA-directed RNA polymerase III, pseudogene	Pseudogene	2219.5	0.1398	0.147	0	0	0	0	-0.9517	0.0807967	0	0	0
Tb927.2.1210	Tb927.2.1210	Tb927.02.1210	retrotransposon hot spot protein 4 (RHS4), putative	RHS	3637.1	0.0109	0.928	0	0	0	0	-0.6421	0.295756	0	0	0
Tb927.2.1250	Tb927.2.1250	Tb927.02.1250	hypothetical protein	ZUnknown	726.7	-0.0875	0.474	0	0	0	0	-0.2371	0.999265	0	0	0
Tb927.2.1260	Tb927.2.1260	Tb927.02.1260	ESAG4 pseudogene	ESAG.pseudo	1395.5	-0.1181	0.265	0	0	0	0	0.101	0.999265	0	0	0
Tb927.2.1290	Tb927.2.1290	Tb927.02.1290	hypothetical protein	ZUnknown	34.3	0.23	0.629	0	0	0	0	-0.3681	0.999265	0	0	0
Tb927.2.1310	Tb927.2.1310	Tb927.02.1310	leucine-rich repeat protein LRRP, pseudogene	LRRP	1937.1	-0.4022	7.44e-05	0	0	0	0	-0.1775	0.999265	0	0	0
Tb927.2.1330	Tb927.2.1330	Tb927.02.1330	retrotransposon hot spot protein (RHS6, pseudogene), putative	RHS	1873.3	0.1493	0.131	0	0	0	0	-0.4726	0.826578	0	0	0
Tb927.2.1344	Tb927.2.1344	Tb927.02.1344	retrotransposon hot spot protein (RHS1, pseudogene), putative	RHS	286.1	0.1592	0.413	0	0	0	0	-1.9331	0.999265	0	0	0
Tb927.2.1350	Tb927.2.1350	Tb927.02.1350	retrotransposon hot spot protein (RHS1, pseudogene), putative	RHS	169.2	-0.4609	0.0162	0	0	0	0	-0.4438	0.945465	0	0	0
Tb927.2.1460	Tb927.2.1460	Tb927.02.1460	hypothetical protein, conserved	ZUnknown	62.8	-0.2681	0.402	0	0	0	0	0.002	0.999915	0	0	0
Tb927.2.1470	Tb927.2.1470	Tb927.02.1470	hypothetical protein, conserved	ZUnknown	33.9	-0.0608	0.908	0	0	0	0	0.758	0.958467	0	0	0
Tb927.2.1560	Tb927.2.1560	Tb927.02.1560	cyclophilin type peptidyl-prolyl cis-trans isomerase, putative (PPIase)	Chaperone	1112.5	0.0156	0.9	0	0	0	0	0.054	0.999265	0	0	1
Tb927.2.1600	Tb927.2.1600	Tb927.02.1600	invariant surface glycoprotein, putative	ZUnknown	963.8	0.3843	1.47e-05	0	0	0	0	-0.0392	0.999265	0	0	1
Tb927.2.1680	Tb927.2.1680	Tb927.02.1680	cyclophilin type peptidyl-prolyl cis-trans isomerase, putative (PPIase)	Chaperone	1950.8	0.1033	0.233	0	0	0	0	-5.1544	0.931915	0	0	0
Tb927.2.1700	Tb927.2.1700	Tb927.02.1700	extracellular matrix structural protein, putative (ESP10)	ZUnknown	3069.1	0.516	3.88e-13	0	0	0	0	0.098	0.999265	0	0	1
Tb927.2.1720	Tb927.2.1720	Tb927.02.1720	hypothetical protein, conserved	ZUnknown	281.7	0.3183	0.0384	0	0	0	0	0.2096	0.999265	0	0	1
Tb927.2.1730	Tb927.2.1730	Tb927.02.1730	hypothetical protein, conserved	ZUnknown	493.5	0.0656	0.661	0	0	0	0	-0.1308	0.999265	0	0	1
Tb927.2.1740	Tb927.2.1740	Tb927.02.1740	hypothetical protein, conserved	ZUnknown	383.6	0.301	0.0179	0	0	0	0	0.2718	0.929025	0	0	1
Tb927.2.1760	Tb927.2.1760	Tb927.02.1760	hypothetical protein, conserved	ZUnknown	3383.5	0.4609	1.11e-12	0	0	0	0	-0.102	0.999265	0	0	1
Tb927.2.1770	Tb927.2.1770	Tb927.02.1770	hypothetical protein, conserved (pseudogene)	Pseudogene	329.4	0.4234	0.00656	0	0	0	0	0.1945	0.999265	0	0	0
Tb927.2.1780	Tb927.2.1780	Tb927.02.1780	UDP-GlcNAc:PI a1-6 GlcNAc-transferase	Glycans	485	0.206	0.104	0	0	0	0	-0.0524	0.999265	0	0	1
Tb927.2.1790	Tb927.2.1790	Tb927.02.1790	hypothetical protein, conserved	ZUnknown	204.8	0.2667	0.186	0	0	0	0	-0.0197	0.999265	0	0	1
Tb927.2.1800	Tb927.2.1800	Tb927.02.1800	DNA polymerase delta catalytic subunit, POLD1	DNA	4406.4	0.0288	0.735	0	0	0	0	-0.0169	0.999265	0	0	1
Tb927.2.1810	Tb927.2.1810	Tb927.02.1810	transcription silencer (ISWI)	Chromatin	5209.7	-0.4401	2.4e-09	0	0	0	0	0.0618	0.999265	0	0	1
Tb927.2.1850	Tb927.2.1850	Tb927.02.1850	Tetratricopeptide repeat, putative	ZUnknown	1465.5	-0.0902	0.357	0	0	0	0	0.1235	0.999265	0	0	1
Tb927.2.1860	Tb927.2.1860	Tb927.02.1860	REMC2 mitochondrial RNA binding complex 1 subunit (MRB1860)	Mito.RNA	2044.5	0.0714	0.409	0	0	0	0	-0.153	0.999265	0	0	1
Tb927.2.1890	Tb927.2.1890	Tb927.02.1890	E2-like ubiquitin-conjugation enzyme (ATG3)	Ubiquitin.proteasome	822.2	0.0973	0.401	0	0	0	0	0.2146	0.999265	0	0	1
Tb927.2.1920	Tb927.2.1920	Tb927.02.1920	ESAG5, putative	ESAG	2059	0.1417	0.0916	0	0	0	0	0.4326	0.512167	0	0	1
Tb927.2.2015	Tb927.2.2015	Tb927.02.2015	hypothetical protein	ZUnknown	54.2	-0.3456	0.335	0	0	0	0	-0.3969	0.999265	0	0	1
Tb927.2.2070	Tb927.2.2070	Tb927.02.2070	hypothetical protein	ZUnknown	297.9	-0.5212	0.000717	0	0	0	0	-0.7789	0.166762	0	0	0
Tb927.2.2090	Tb927.2.2090	Tb927.02.2090	hypothetical protein	ZUnknown	3620.4	-0.1386	0.116	0	0	0	0	-0.2197	0.999265	0	0	1
Tb927.2.2120	Tb927.2.2120	Tb927.02.2120	NEK22 protein kinase	Protein.kinase	1219	-0.2723	0.00242	0	0	0	0	0.585	0.278882	0	0	1
Tb927.2.2130	Tb927.2.2130	Tb927.02.2130	small GTP-binding protein RAB6, putative	Vesicular.transport	637.5	-0.1512	0.246	0	0	0	0	-0.6291	0.16842	0	0	1
Tb927.2.2140	Tb927.2.2140	Tb927.02.2140	hypothetical protein, conserved	ZUnknown	127.9	-0.0413	0.883	0	0	0	0	-0.7516	0.0989815	0	0	1
Tb927.2.2160	Tb927.2.2160	Tb927.02.2160	paraflagellar rod protein PFC11	Cytoskeleton	2926.8	0.2794	5.5e-05	0	0	0	0	0.1455	0.999265	0	0	1
Tb927.2.2180	Tb927.2.2180	Tb927.02.2180	RRP41B exosome protein PH subunit	RNA.degradation	735.9	-0.1247	0.247	0	0	0	0	-0.1151	0.905028	0	0	1
Tb927.2.2190	Tb927.2.2190	Tb927.02.2190	histone deacetylase 3 (DAC3 or HDAC3)	Chromatin	1114.4	-0.0077	0.952	0	0	0	0	0.1703	0.907775	0	0	1
Tb927.2.2200	Tb927.2.2200	Tb927.02.2200	hypothetical protein, conserved	ZUnknown	463.9	-0.1708	0.198	0	0	0	0	-0.0941	0.999265	0	0	1
Tb927.2.2210	Tb927.2.2210	Tb927.02.2210	hypothetical protein, conserved	Mito.pathway	2255.3	-0.1893	0.0113	0	0	0	0	-0.07	0.999265	0	0	1
Tb927.2.2220	Tb927.2.2220	Tb927.02.2220	hypothetical protein, conserved	ZUnknown	440.5	-0.0946	0.534	0	0	0	0	-0.1653	0.92516	0	0	1
Tb927.2.2230	Tb927.2.2230	Tb927.02.2230	hypothetical protein, conserved, no domains, Kineto-specific	ZUnknown	1697.3	-0.5739	1.13e-11	0	0	0	0	-0.1679	0.914494	0	0	1
Tb927.2.2240	Tb927.2.2240	Tb927.02.2240	tRNA exportin, putative,exportin-T, putative (25N14.145)	Nuclear.transport	3080.1	-0.0692	0.389	0	0	0	0	0.1031	0.999265	0	0	1
Tb927.2.2260	Tb927.2.2260	Tb927.02.2260	ATM kinase	Signalling	16390.7	0.5242	4.45e-16	0	0	0	0	0.7667	0.273564	0	0	1
Tb927.2.2270	Tb927.2.2270	Tb927.02.2270	hypothetical protein, conserved	ZUnknown	573.8	-0.2002	0.0998	0	0	0	0	0.009	0.999265	0	0	1
Tb927.2.2320	Tb927.2.2320	Tb927.02.2320	hypothetical protein	ZUnknown	249	-0.5676	0.000738	0	0	0	0	1.8158	0.259319	0	0	1
Tb927.2.2340	Tb927.2.2340	Tb927.02.2340	Glycerophosphoryl diester phosphodiesterase family, putative	ZUnknown	3288.8	0.0849	0.284	0	0	0	0	1.9391	4.82726e-10	1	0	1
Tb927.2.2360	Tb927.2.2360	Tb927.02.2360	Ankyrin repeats (3 copies)/Zinc finger, C3HC4 type (RING finger), putative	ZUnknown	1475.8	0.0347	0.739	0	0	0	0	1.0127	8.38172e-08	1	0	1
Tb927.2.2370	Tb927.2.2370	Tb927.02.2370	Vps51/Vps67, putative	ZUnknown	3540.8	-0.3231	2.91e-06	0	0	0	0	-0.138	0.999265	0	0	1
Tb927.2.2380	Tb927.2.2380	Tb927.02.2380	glycosyltransferase (GlcNAc), putative	Glycans	1883.9	-0.3197	0.0001	0	0	0	0	0.1105	0.999265	0	0	1
Tb927.2.2390	Tb927.2.2390	Tb927.02.2390	hypothetical protein, conserved	ZUnknown	761.7	-0.051	0.693	0	0	0	0	-0.0032	0.999265	0	0	1
Tb927.2.2400	Tb927.2.2400	Tb927.02.2400	glycosyltransferase (GlcNAc), putative	Glycans	1461.1	0.1103	0.249	0	0	0	0	1.2768	6.58873e-05	1	0	1
Tb927.2.2410	Tb927.2.2410	Tb927.02.2410	hypothetical protein, conserved	ZUnknown	1095.7	-0.3431	0.000193	0	0	0	0	-0.2093	0.665314	0	0	1
Tb927.2.2430	Tb927.2.2430	Tb927.02.2430	CK2A2 casein kinase II	Protein.kinase	1185.8	-0.0876	0.392	0	0	0	0	0.0742	0.999265	0	0	1
Tb927.2.2440	Tb927.2.2440	Tb927.02.2440	proteasome regulatory non-ATPase subunit 6 (RPN6)	Ubiquitin.proteasome	2968.6	-0.0131	0.904	0	0	0	0	0.1471	0.999265	0	0	1
Tb927.2.2450	Tb927.2.2450	Tb927.02.2450	ribosomal RNA methyltransferase, putative (25N14.40)	rRNA.tRNA.process	888.9	0.0892	0.418	0	0	0	0	0.1191	0.983586	0	0	1
Tb927.2.2460	Tb927.2.2460	Tb927.02.2460	SUMO-conjugating enzyme e2, UBC9	Ubiquitin.proteasome	904.2	0.303	0.00104	0	0	0	0	0.475	0.0844409	0	0	1
Tb927.2.2470	Tb927.2.2470	Tb927.02.2470	RNA-editing complex protein,KREPA1 (KREPA1)	Mito.RNA	1895.4	0.1785	0.0274	0	0	0	0	0.0685	0.999265	0	0	1
Tb927.2.2490	Tb927.2.2490	Tb927.02.2490	hypothetical protein	ZUnknown	2360.8	0.2378	0.00295	0	0	0	0	-0.2674	0.999265	0	0	1
Tb927.2.2500	Tb927.2.2500	Tb927.02.2500	hypothetical protein, conserved	ZUnknown	586	0.0227	0.899	0	0	0	0	0.021	0.999265	0	0	1
Tb927.2.2510	Tb927.2.2510	Tb927.02.2510	Mitochondrial outer membrane protein porin 1	Ions	2171.9	0.0448	0.627	0	0	0	0	0.0844	0.999265	0	0	1
Tb927.2.2520	Tb927.2.2520	Tb927.02.2520	Mitochondrial outer membrane protein porin 2	Ions	2143	0.0969	0.248	0	0	0	0	-0.0371	0.999265	0	0	0
Tb927.2.2530	Tb927.2.2530	Tb927.02.2530	hypothetical protein, conserved	ZUnknown	1877.9	0.3144	8.37e-05	0	0	0	0	0.0382	0.999265	0	0	1
Tb927.2.2540	Tb927.2.2540	Tb927.02.2540	Ribosome biogenesis protein SLX9, putative	ZUnknown	320.3	-0.1542	0.338	0	0	0	0	-0.1604	0.999265	0	0	1
Tb927.2.2550	Tb927.2.2550	Tb927.02.2550	hypothetical protein, conserved	ZUnknown	775.8	0.1074	0.338	0	0	0	0	0.0822	0.999265	0	0	1
Tb927.2.2570	Tb927.2.2570	Tb927.02.2570	GAP2	Mito.RNA	264.4	0.3842	0.00744	0	0	0	0	0.0498	0.999265	0	0	1
Tb927.2.2580	Tb927.2.2580	Tb927.02.2580	hypothetical protein, conserved	ZUnknown	2798	-0.1227	0.106	0	0	0	0	0.0415	0.999265	0	0	1
Tb927.2.2590	Tb927.2.2590	Tb927.02.2590	hypothetical protein, conserved	ZUnknown	278.8	0.3407	0.0184	0	0	0	0	0.051	0.999265	0	0	1
Tb927.2.2650	Tb927.2.2650	Tb927.02.2650	hypothetical protein, conserved	ZUnknown	10629.1	-0.2011	0.00205	0	0	0	0	-0.2946	0.957952	0	0	1
Tb927.2.2720	Tb927.2.2720	Tb927.02.2720	MEKK1 or FlaK protein kinase, putative	Protein.kinase	3837.8	0.1193	0.123	0	0	0	0	0.8005	0.0200207	0	0	1
Tb927.2.2770	Tb927.2.2770	Tb927.02.2770	hypothetical protein, conserved	ZUnknown	2277.5	-0.4327	1.22e-05	0	0	0	0	0.4584	0.927704	0	0	1
Tb927.2.2830	Tb927.2.2830	Tb927.02.2830	hypothetical protein, conserved	ZUnknown	758.3	-0.5537	9.11e-10	0	0	0	0	-0.0318	0.999265	0	0	1
Tb927.2.2860	Tb927.2.2860	Tb927.02.2860	hypothetical protein, conserved	ZUnknown	957.3	0.0406	0.735	0	0	0	0	0.1786	0.901005	0	0	1
Tb927.2.2880	Tb927.2.2880	Tb927.02.2880	TPR repeat/Tetratricopeptide repeat, putative	ZUnknown	1454.6	-0.1488	0.0877	0	0	0	0	0.013	0.999265	0	0	1
Tb927.2.2900	Tb927.2.2900	Tb927.02.2900	ARP2/3 complex subunit, putative	Cytoskeleton	506.4	0.0535	0.724	0	0	0	0	-0.3151	0.865658	0	0	1
Tb927.2.2910	Tb927.2.2910	Tb927.02.2910	hypothetical protein, conserved	ZUnknown	995.8	-0.0659	0.553	0	0	0	0	-0.2398	0.657539	0	0	1
Tb927.2.2920	Tb927.2.2920	Tb927.02.2920	UAA transporter family, putative	ZUnknown	895.9	0.0977	0.343	0	0	0	0	0.0331	0.999265	0	0	1
Tb927.2.2940	Tb927.2.2940	Tb927.02.2940	MIC32	Mito.biogenesis	526	-0.0782	0.565	0	0	0	0	-0.136	0.999265	0	0	1
Tb927.2.2950	Tb927.2.2950	Tb927.02.2950	Nop14-like family, putative	ZUnknown	1895.5	-0.4832	4.96e-09	0	0	0	0	-0.4411	0.364871	0	0	1
Tb927.2.2970	Tb927.2.2970	Tb927.02.2970	mitochondrial carrier protein, MCP13	Mito.transport	409.1	-0.4195	0.000309	0	0	0	0	-0.425	0.879444	0	0	1
Tb927.2.2990	Tb927.2.2990	Tb927.02.2990	hypothetical protein, conserved	ZUnknown	1330.9	-0.3089	0.000577	0	0	0	0	-0.3416	0.874932	0	0	1
Tb927.2.3000	Tb927.2.3000	Tb927.02.3000	hypothetical protein, conserved	ZUnknown	899.8	-0.3761	3.89e-05	0	0	0	0	-0.3543	0.22174	0	0	1
Tb927.2.3020	Tb927.2.3020	Tb927.02.3020	hypothetical protein, conserved	ZUnknown	2339	-0.4213	2.47e-09	0	0	0	0	-0.3636	0.298731	0	0	1
Tb927.2.3030	Tb927.2.3030	Tb927.02.3030	ATP-dependent Clp protease subunit, heat shock protein 78 (HSP78)	Chaperone	3145.8	-0.0183	0.849	0	0	0	0	-0.124	0.999265	0	0	1
Tb927.2.3055	Tb927.2.3055	Tb927.02.3055	hypothetical protein	ZUnknown	145.7	-0.5241	0.00575	0	0	0	0	0.0342	0.999265	0	0	1
Tb927.2.3160	Tb927.2.3160	Tb927.02.3160	Gar1/Naf1 RNA binding region, putative	ZUnknown	806.5	-0.362	0.000102	0	0	0	0	-0.463	0.169175	0	0	1
Tb927.2.3180	Tb927.2.3180	Tb927.02.3180	kinetoplast polyadenylation/uridylation factor 1 (KPAF1), PPR1	Mito.RNA	1753.4	-0.3211	0.000478	0	0	0	0	-0.283	0.861963	0	0	1
Tb927.2.3190	Tb927.2.3190	Tb927.02.3190	Got1/Sft2-like family, putative	ZUnknown	360	-0.2139	0.123	0	0	0	0	-0.1533	0.95615	0	0	1
Tb927.2.3370	Tb927.2.3370	Tb927.02.3370	UDP-Gal glycosyltransferase GT3	Glycans	1143.6	0.033	0.811	0	0	0	0	0.2451	0.810837	0	0	1
Tb927.2.3390	Tb927.2.3390	Tb927.02.3390	hypothetical protein, conserved	ZUnknown	1858.2	-0.2551	0.000744	0	0	0	0	-0.0229	0.999265	0	0	1
Tb927.2.3400	Tb927.2.3400	Tb927.02.3400	conserved, found in PRP19 pull-down	RNA.processing	489.6	-0.1377	0.441	0	0	0	0	-0.1012	0.999265	0	0	1
Tb927.2.3420	Tb927.2.3420	Tb927.02.3420	hypothetical protein, conserved	ZUnknown	532.6	-0.0615	0.677	0	0	0	0	-0.0548	0.999265	0	0	1
Tb927.2.3440	Tb927.2.3440	Tb927.02.3440	D-alanyl-glycyl endopeptidase-like protein,cysteine peptidase, Clan CA, family C51, putative	Protease	648.5	-0.1253	0.262	0	0	0	0	-0.1325	0.982676	0	0	0
Tb927.2.3460	Tb927.2.3460	Tb927.02.3460	D-alanyl-glycyl endopeptidase-like protein,cysteine peptidase, Clan CA, family C51, putative	Protease	665.4	-0.1583	0.153	0	0	0	0	0.3529	0.71846	0	0	0
Tb927.2.3480	Tb927.2.3480	Tb927.02.3480	Transcription elongation factor s-II, putative (TFIIS2-2)	RNA.synthesis	1259.4	-0.483	2.67e-06	0	0	0	0	-0.2864	0.391678	0	0	1
Tb927.2.3580	Tb927.2.3580	Tb927.02.3580	transcription elongation factor s-II, putative (TFIIS2-1)	RNA.synthesis	3322.3	-0.4019	3.82e-07	0	0	0	0	0.5915	0.512167	0	0	1
Tb927.2.3610	Tb927.2.3610	Tb927.02.3610	Mitochondrial ATP synthase subunit, putative	Mito.pathway	895.7	0.2336	0.0172	0	0	0	0	-0.2684	0.80921	0	0	1
Tb927.2.3620	Tb927.2.3620	Tb927.02.3620	GTP-binding elongation factor Tu family, putative	Translation	2219.9	-0.0061	0.952	0	0	0	0	0.0327	0.999265	0	0	1
Tb927.2.3660	Tb927.2.3660	Tb927.02.3660	paraflagellar rod protein PFC10	Cytoskeleton	12083.3	-0.2318	6.72e-05	0	0	0	0	0.1248	0.999265	0	0	1
Tb927.2.3730	Tb927.2.3730	Tb927.02.3730	hypothetical protein, conserved	ZUnknown	1285.4	-0.1342	0.129	0	0	0	0	0.0368	0.999265	0	0	1
Tb927.2.3750	Tb927.2.3750	Tb927.02.3750	Domain of unknown function (DUF4520), putative	ZUnknown	1135.4	-0.2645	0.00176	0	0	0	0	-0.066	0.999265	0	0	1
Tb927.2.3800	Tb927.2.3800	Tb927.02.3800	GRBC2 mRNA processing protein, putative GAP1 MRB complex protein	Mito.RNA	2519.6	-0.243	0.000947	0	0	0	0	-0.2557	0.85952	0	0	1
Tb927.2.3880	Tb927.2.3880	Tb927.02.3880	HNRNPH/F	RNA.processing	2669.6	-0.3636	3.73e-06	0	0	0	0	1.6451	0.0186812	1	0	1
Tb927.2.3910	Tb927.2.3910	Tb927.02.3910	beta-ketoacyl synthase family protein, putative	Lipids	1261.5	0.1662	0.0614	0	0	0	0	0.0699	0.999265	0	0	1
Tb927.2.3920	Tb927.2.3920	Tb927.02.3920	Complex 1 protein (LYR family), putative	ZUnknown	531	0.2241	0.0676	0	0	0	0	-0.0429	0.999265	0	0	1
Tb927.2.3930	Tb927.2.3930	Tb927.02.3930	DNA replication licensing factor MCM3	DNA	1660.5	-0.172	0.0307	0	0	0	0	-0.0322	0.999265	0	0	1
Tb927.2.3960	Tb927.2.3960	Tb927.02.3960	chaperone DNAj, putative, J56	Chaperone	313	-0.0701	0.69	0	0	0	0	-0.2267	0.603314	0	0	1
Tb927.2.3970	Tb927.2.3970	Tb927.02.3970	hypothetical protein, conserved	ZUnknown	835.1	0.0054	0.969	0	0	0	0	-0.135	0.973923	0	0	1
Tb927.2.3990	Tb927.2.3990	Tb927.02.3990	GRIP-related Arf-binding domain containing protein, putative	ZUnknown	2547.7	-0.1198	0.185	0	0	0	0	-0.1434	0.999265	0	0	1
Tb927.2.4000	Tb927.2.4000	Tb927.02.4000	hypothetical protein, conserved	ZUnknown	1836.3	-0.257	0.00135	0	0	0	0	-0.3119	0.458589	0	0	1
Tb927.2.4020	Tb927.2.4020	Tb927.02.4020	TbNedd8-activating enzyme (TbAPPBP1)	Ubiquitin.proteasome	1995.3	0.0582	0.532	0	0	0	0	-0.0173	0.999265	0	0	1
Tb927.2.4050	Tb927.2.4050	Tb927.02.4050	hypothetical protein, conserved	ZUnknown	4040.6	0.0151	0.871	0	0	0	0	0.059	0.999265	0	0	0
Tb927.2.4060	Tb927.2.4060	Tb927.02.4060	dynein intermediate chain IC 138	Cytoskeleton	3014.2	0.0057	0.953	0	0	0	0	0.007	0.999265	0	0	1
Tb927.2.4090	Tb927.2.4090	Tb927.02.4090	signal recognition particle receptor beta subunit, putative	ZUnknown	1335.3	-0.1053	0.275	0	0	0	0	-0.2684	0.860844	0	0	1
Tb927.2.4110	Tb927.2.4110	Tb927.02.4110	mitochondrial processing peptidase alpha subunit MPP alpha	Mito.biogenesis	1987.9	-0.1079	0.29	0	0	0	0	-0.0808	0.999265	0	0	1
Tb927.2.4130	Tb927.2.4130	Tb927.02.4130	enoyl-CoA hydratase/Enoyl-CoA isomerase/3-hydroxyacyl-CoA dehydrogenase, putative	Lipids	2661.6	-0.1103	0.15	0	0	0	0	-0.3049	0.0762747	0	0	1
Tb927.2.4140	Tb927.2.4140	Tb927.02.4140	hypothetical protein, conserved	ZUnknown	2330.5	-0.2431	0.000886	0	0	0	0	-0.339	0.217814	0	0	1
Tb927.2.4150	Tb927.2.4150	Tb927.02.4150	hypothetical protein, conserved	ZUnknown	691.6	-0.4408	3.51e-06	0	0	0	0	-0.0714	0.999265	0	0	1
Tb927.2.4160	Tb927.2.4160	Tb927.02.4160	hypothetical protein, conserved	ZUnknown	1531	-0.3818	6.86e-06	0	0	0	0	-0.2681	0.553662	0	0	1
Tb927.2.4210	Tb927.2.4210	Tb927.02.4210	glycosomal phosphoenolpyruvate carboxykinase (PEPCK)	Glucose.glycerol	4548.8	-0.1903	0.00443	0	0	0	0	-0.2803	0.886514	0	0	1
Tb927.2.4230	Tb927.2.4230	Tb927.02.4230	Nucleoporin NUP-1 protein, putative	Nuclear.transport	19002.9	-0.116	0.106	0	0	0	0	-0.2174	0.999265	0	0	0
Tb927.2.4240	Tb927.2.4240	Tb927.02.4240	GTP binding protein, putative	Mito.pathway	726.1	0.0154	0.911	0	0	0	0	-0.1756	0.966631	0	0	1
Tb927.2.4280	Tb927.2.4280	Tb927.02.4280	kinetoplastid-specific dual specificity phosphatase, putative	Phosphatase	5813.7	0.0539	0.46	0	0	0	0	1.9077	5.60479e-15	1	0	1
Tb927.2.4330	Tb927.2.4330	Tb927.02.4330	paraflagellar rod protein PFR5	Cytoskeleton	2415.5	0.1676	0.0256	0	0	0	0	0.3632	0.71649	0	0	1
Tb927.2.4340	Tb927.2.4340	Tb927.02.4340	hypothetical protein, conserved	ZUnknown	625.2	0.2243	0.0541	0	0	0	0	0.0004	0.999915	0	0	1
Tb927.2.4370	Tb927.2.4370	Tb927.02.4370	trypanothione synthetase (TRYS)	Redox	2838.2	-0.0085	0.93	0	0	0	0	-0.4839	0.446041	0	0	1
Tb927.2.4380	Tb927.2.4380	Tb927.02.4380	hypothetical protein, conserved	Mito.pathway	754.9	0.224	0.0306	0	0	0	0	-0.0852	0.999265	0	0	1
Tb927.2.4390	Tb927.2.4390	Tb927.02.4390	endo/exonuclease Mre11 (MRE11)	DNA	2812.8	0.1687	0.0176	0	0	0	0	-0.0291	0.999265	0	0	1
Tb927.2.4400	Tb927.2.4400	Tb927.02.4400	SSU ribosomal protein, mitochondrial, putative	Mito.translation	3378.3	0.0275	0.773	0	0	0	0	-0.2126	0.980747	0	0	1
Tb927.2.4410	Tb927.2.4410	Tb927.02.4410	Eukaryotic protein of unknown function (DUF846), putative	ZUnknown	2273.4	0.2667	0.000479	0	0	0	0	0.115	0.999265	0	0	1
Tb927.2.4420.1	Tb927.2.4420	Tb927.02.4420	MIZ/SP-RING zinc finger, putative	ZUnknown	784.7	0.101	0.359	0	0	0	0	-0.1353	0.913675	0	0	1
Tb927.2.4420.2	Tb927.2.4420	Tb927.02.4420	MIZ/SP-RING zinc finger, putative	ZUnknown	917.7	0.1636	0.105	0	0	0	0	-0.1353	0.913675	0	0	1
Tb927.2.4440	Tb927.2.4440	Tb927.02.4440	hypothetical protein	ZUnknown	885.9	-0.4534	3.65e-06	0	0	0	0	-0.0054	0.999265	0	0	1
Tb927.2.4445	Tb927.2.4445	Tb927.02.4445	hypothetical protein, conserved	ZUnknown	1286.6	-0.0166	0.892	0	0	0	0	0.0954	0.999265	0	0	1
Tb927.2.4460	Tb927.2.4460	Tb927.02.4460	hypothetical protein, conserved	ZUnknown	1694.5	0.0402	0.685	0	0	0	0	0.1356	0.999265	0	0	1
Tb927.2.4470	Tb927.2.4470	Tb927.02.4470	hypothetical protein, conserved	ZUnknown	1696.9	0.1426	0.0955	0	0	0	0	0.1009	0.999265	0	0	1
Tb927.2.4480	Tb927.2.4480	Tb927.02.4480	hypothetical protein, conserved	ZUnknown	1282.8	0.1125	0.249	0	0	0	0	-0.06	0.999265	0	0	1
Tb927.2.4510	Tb927.2.4510	Tb927.02.4510	CRK9 cdc2- like protein kinase	RNA.processing	3359.6	0.2613	0.000187	0	0	0	0	-0.1007	0.999265	0	0	1
Tb927.2.4520	Tb927.2.4520	Tb927.02.4520	hypothetical protein, conserved	ZUnknown	5458.1	-0.0863	0.289	0	0	0	0	-0.0273	0.999265	0	0	1
Tb927.2.4530	Tb927.2.4530	Tb927.02.4530	intraflagellar transport protein IFT43	Cytoskeleton	945.1	-0.1674	0.101	0	0	0	0	-0.133	0.999265	0	0	1
Tb927.2.4540	Tb927.2.4540	Tb927.02.4540	Small nuclear ribonucleoprotein-associated protein B (TbSmB)	RNA.processing	631.3	-0.2296	0.0317	0	0	0	0	-0.3546	0.13233	0	0	1
Tb927.2.4550	Tb927.2.4550	Tb927.02.4550	SPB1 rRNA methyltransferase	rRNA.tRNA.process	3224.9	-0.5589	7.41e-11	0	0	0	0	-0.3532	0.708953	0	0	1
Tb927.2.4560	Tb927.2.4560	Tb927.02.4560	TBC-D2 likely GAP	Signalling	844.5	-0.312	0.0023	0	0	0	0	-0.2744	0.760465	0	0	1
Tb927.2.4590	Tb927.2.4590	Tb927.02.4590	branched-chain amino acid aminotransferase, putative	Amino.acids	4731.4	-0.1845	0.00591	0	0	0	0	0.1994	0.94117	0	0	1
Tb927.2.4610	Tb927.2.4610	Tb927.02.4610	branched-chain amino acid aminotransferase, putative	Amino.acids	2837.3	-0.1767	0.0185	0	0	0	0	-0.0193	0.999265	0	0	0
Tb927.2.4620	Tb927.2.4620	Tb927.02.4620	Transmembrane adaptor Erv26, putative	ZUnknown	625	0.0168	0.91	0	0	0	0	-0.2106	0.999265	0	0	1
Tb927.2.4650	Tb927.2.4650	Tb927.02.4650	hypothetical protein, conserved	ZUnknown	529.1	0.0442	0.757	0	0	0	0	-0.1096	0.95615	0	0	1
Tb927.2.4670	Tb927.2.4670	Tb927.02.4670	hypothetical protein, conserved	ZUnknown	836.1	0.2427	0.0307	0	0	0	0	0.3347	0.979719	0	0	1
Tb927.2.4680	Tb927.2.4680	Tb927.02.4680	hypothetical protein, conserved	ZUnknown	749.1	0.3843	0.000282	0	0	0	0	0.0967	0.999265	0	0	1
Tb927.2.4700	Tb927.2.4700	Tb927.02.4700	SDH8 succinate dehydrogenase (complex II) subunit	Mito.e.transport	585.6	0.5413	1.17e-07	0	0	0	0	0.7637	0.287347	0	0	1
Tb927.2.4710	Tb927.2.4710	Tb927.02.4710	TRRM1	RNA.processing	7115.9	-0.4502	3.57e-08	0	0	0	0	-0.0793	0.999265	0	0	1
Tb927.2.4720	Tb927.2.4720	Tb927.02.4720	dolichyl-P-Man:GDP-Man7GlcNAc2-PP-dolichyl alpha-1,6-mannosyltransferase, putative	Glycans	1288.2	-0.5157	8.14e-10	0	0	0	0	0.3071	0.616736	0	0	1
Tb927.2.4740	Tb927.2.4740	Tb927.02.4740	mitochondrial ribosomal protein l11	Mito.translation	501.4	0.3035	0.00728	0	0	0	0			0	0	1
Tb927.2.4750	Tb927.2.4750	Tb927.02.4750	hypothetical protein, conserved	ZUnknown	407	0.2288	0.107	0	0	0	0	-0.0453	0.999265	0	0	1
Tb927.2.4760	Tb927.2.4760	Tb927.02.4760	hypothetical protein, conserved, signal pep, lectin-like domain	ZUnknown	1320.6	-0.4173	3.06e-05	0	0	0	0	-0.2976	0.236449	0	0	0
Tb927.2.4780	Tb927.2.4780	Tb927.02.4780	hypothetical protein, conserved	ZUnknown	3006.4	-0.0894	0.288	0	0	0	0	-0.0629	0.999265	0	0	1
Tb927.2.4795	Tb927.2.4795	Tb927.02.4795	hypothetical protein	ZUnknown	631.1	0.3435	0.000814	0	0	0	0	0.0062	0.999265	0	0	1
Tb927.2.4800	Tb927.2.4800	Tb927.02.4800	hypothetical protein, conserved	ZUnknown	1319	0.1943	0.0425	0	0	0	0	0.0151	0.999265	0	0	1
Tb927.2.4810	Tb927.2.4810	Tb927.02.4810	CMF5, T. brucei components of motile flagella (TbCMF5)	Cytoskeleton	6281.7	-0.0969	0.167	0	0	0	0	0.1588	0.987569	0	0	1
Tb927.2.4830	Tb927.2.4830	Tb927.02.4830	TFIIF-stimulated CTD phosphatase, putative	Protein.phosphatase	1563.3	0.1431	0.0954	0	0	0	0	-0.1975	0.581079	0	0	1
Tb927.2.4840	Tb927.2.4840	Tb927.02.4840	Vitamin K epoxide reductase family, putative	ZUnknown	474	0.2545	0.0579	0	0	0	0	-0.1216	0.809252	0	0	1
Tb927.2.4850	Tb927.2.4850	Tb927.02.4850	Phosducin, putative	ZUnknown	2033.1	-0.1475	0.0756	0	0	0	0	-0.1901	0.3439	0	0	1
Tb927.2.4870	Tb927.2.4870	Tb927.02.4870	kinetoplastid-specific dual specificity phosphatase, putative	Phosphatase	973.3	0.119	0.297	0	0	0	0	0.1874	0.831726	0	0	1
Tb927.2.4890	Tb927.2.4890	Tb927.02.4890	ribosomal protein L11, putative	Mito.translation	487.3	0.1498	0.257	0	0	0	0	-0.1272	0.999265	0	0	0
Tb927.2.4900	Tb927.2.4900	Tb927.02.4900	hypothetical protein, conserved	ZUnknown	364.4	0.1542	0.308	0	0	0	0	-0.0846	0.999265	0	0	0
Tb927.2.4920	Tb927.2.4920	Tb927.02.4920	hypothetical protein, conserved, signal pep, lectin-like domain	ZUnknown	763	-0.2052	0.118	0	0	0	0	-0.1318	0.999265	0	0	0
Tb927.2.4925	Tb927.2.4925	Tb927.02.4925	hypothetical protein	ZUnknown	84	-0.2266	0.418	0	0	0	0	0.086	0.999265	0	0	1
Tb927.2.4930	Tb927.2.4930	Tb927.02.4930	esterase, putative	Enzyme	958.7	-0.0432	0.735	0	0	0	0	0.1633	0.991116	0	0	1
Tb927.2.4950	Tb927.2.4950	Tb927.02.4950	hypothetical protein, conserved	ZUnknown	2731.2	0.0442	0.663	0	0	0	0	-0.0783	0.999265	0	0	1
Tb927.2.4970	Tb927.2.4970	Tb927.02.4970	UV radiation resistance protein and autophagy-related subunit 14, putative	ZUnknown	1507.5	0.0988	0.329	0	0	0	0	-0.0238	0.999265	0	0	1
Tb927.2.4980	Tb927.2.4980	Tb927.02.4980	EMG1/NEP1 methyltransferase, putative	ZUnknown	880.1	0.3675	0.000487	0	0	0	0	-0.0378	0.999265	0	0	1
Tb927.2.4990	Tb927.2.4990	Tb927.02.4990	hypothetical protein, conserved	ZUnknown	2276.4	0.1051	0.283	0	0	0	0	0.0649	0.999265	0	0	1
Tb927.2.5000	Tb927.2.5000	Tb927.02.5000	hypothetical protein, conserved, no domains, no yeast or human match	ZUnknown	1061.7	-0.1552	0.102	0	0	0	0	0.0738	0.999265	0	0	1
Tb927.2.5010	Tb927.2.5010	Tb927.02.5010	Meiotic cell cortex C-terminal pleckstrin homology, putative	ZUnknown	1564.9	0.1548	0.0926	0	0	0	0	-0.0988	0.999265	0	0	1
Tb927.2.5020	Tb927.2.5020	Tb927.02.5020	acyl-CoA oxidase, putative	Lipids	2860	0.0259	0.798	0	0	0	0	-0.0251	0.999265	0	0	1
Tb927.2.5030	Tb927.2.5030	Tb927.02.5030	SPT5 transcription elongation	RNA.synthesis	2615.1	-0.0301	0.785	0	0	0	0	-0.0104	0.999265	0	0	1
Tb927.2.5040	Tb927.2.5040	Tb927.02.5040	MORN repeat, putative	ZUnknown	620.7	-0.0512	0.785	0	0	0	0	-0.0242	0.999265	0	0	1
Tb927.2.5050	Tb927.2.5050	Tb927.02.5050	protein phosphatase 2C, putative	Protein.phosphatase	1014.2	0.1754	0.0827	0	0	0	0	-0.0263	0.999265	0	0	1
Tb927.2.5060	Tb927.2.5060	Tb927.02.5060	GTP binding protein, putative	Enzyme	4391.8	-0.2799	0.000226	0	0	0	0	-0.2238	0.994529	0	0	1
Tb927.2.5070	Tb927.2.5070	Tb927.02.5070	hypothetical protein, conserved	ZUnknown	248.8	0.2929	0.0638	0	0	0	0	0.1712	0.999265	0	0	1
Tb927.2.5080	Tb927.2.5080	Tb927.02.5080	hypothetical protein, conserved	ZUnknown	729.6	0.3952	3.73e-05	0	0	0	0	0.0334	0.999265	0	0	1
Tb927.2.5120	Tb927.2.5120	Tb927.02.5120	vesicle-associated membrane protein, in Tc vacuolar proteome	Vesicular.transport	489.8	-0.3927	0.00203	0	0	0	0	-0.6993	0.108405	0	0	1
Tb927.2.5130	Tb927.2.5130	Tb927.02.5130	hypothetical protein, conserved	ZUnknown	1297.3	0.1447	0.161	0	0	0	0	-0.1251	0.975381	0	0	1
Tb927.2.5140	Tb927.2.5140	Tb927.02.5140	hypothetical protein, conserved	ZUnknown	347.2	0.1585	0.283	0	0	0	0	0.0612	0.999265	0	0	1
Tb927.2.5150	Tb927.2.5150	Tb927.02.5150	TPR-repeat protein, putative	ZUnknown	2229.6	-0.0352	0.724	0	0	0	0	-0.0379	0.999265	0	0	1
Tb927.2.5160	Tb927.2.5160	Tb927.02.5160	chaperone DNAj, putative, J2	Chaperone	9471.7	0.1478	0.0421	0	0	0	0	0.1161	0.980882	0	0	1
Tb927.2.5180	Tb927.2.5180	Tb927.02.5180	aldo-keto reductase, putative	Enzyme	1215.4	0.0331	0.762	0	0	0	0	0.1798	0.916669	0	0	1
Tb927.2.5190	Tb927.2.5190	Tb927.02.5190	HOP2 putative homologue, involved in meiosis?	DNA	466.3	0.3202	0.00488	0	0	0	0	-0.3552	0.53437	0	0	1
Tb927.2.5200	Tb927.2.5200	Tb927.02.5200	hypothetical protein, conserved, resembles human cholesterol esterase	Sterols	2498.6	-0.0072	0.949	0	0	0	0	0.0128	0.999265	0	0	1
Tb927.2.5210	Tb927.2.5210	Tb927.02.5210	3-oxoacyl-ACP reductase, putative	Lipids	1011.1	0.1419	0.156	0	0	0	0	0.1133	0.999265	0	0	1
Tb927.2.5220	Tb927.2.5220	Tb927.02.5220	hypothetical protein, conserved	ZUnknown	1327.5	-0.2913	0.000425	0	0	0	0	-0.394	0.498122	0	0	1
Tb927.2.5230	Tb927.2.5230	Tb927.02.5230	protein kinase, putative	Protein.kinase	857.3	0.2827	0.00232	0	0	0	0	0.0007	0.999915	0	0	1
Tb927.2.5240	Tb927.2.5240	Tb927.02.5240	PRP19	RNA.processing	1955.9	0.0175	0.893	0	0	0	0	-0.0914	0.999265	0	0	1
Tb927.2.5250	Tb927.2.5250	Tb927.02.5250	tubulin-tyrosine ligase, putative	Cytoskeleton	1765.2	0.2573	0.00104	0	0	0	0	0.0303	0.999265	0	0	1
Tb927.2.5260	Tb927.2.5260	Tb927.02.5260	hypothetical protein, conserved	ZUnknown	491.5	-0.3116	0.00818	0	0	0	0	-0.1069	0.999265	0	0	1
Tb927.2.5270	Tb927.2.5270	Tb927.02.5270	IAD-3 inner arm dynein heavy chain	Cytoskeleton	33483.7	-0.0744	0.292	0	0	0	0	-0.0715	0.999265	0	0	1
Tb927.2.5280	Tb927.2.5280	Tb927.02.5280	ESP1 trans-sialidase, putative	Membrane.protein	2954.2	0.0018	0.987	0	0	0	0	0.11	0.999265	0	0	1
Tb927.2.5290	Tb927.2.5290	Tb927.02.5290	hypothetical protein, conserved, signal pep, lectin-like domain	ZUnknown	210.7	-0.3229	0.0678	0	0	0	0	0.3876	0.999265	0	0	0
Tb927.2.5410	Tb927.2.5410	Tb927.02.5410	ABC transporter, putative	Transporter	2356.8	-0.3443	7.37e-06	0	0	0	0	-0.0849	0.999265	0	0	1
Tb927.2.5440	Tb927.2.5440	Tb927.02.5440	hypothetical protein, conserved	ZUnknown	2391.1	0.2841	0.000217	0	0	0	0	0.4035	0.269917	0	0	1
Tb927.2.5480	Tb927.2.5480	Tb927.02.5480	hypothetical protein, conserved	ZUnknown	952.6	0.0277	0.82	0	0	0	0	2.9382	0.999265	0	0	1
Tb927.2.5500	Tb927.2.5500	Tb927.02.5500	hypothetical protein, conserved	ZUnknown	891.6	0.4525	2.03e-07	0	0	0	0	-0.3193	0.999265	0	0	1
Tb927.2.5530	Tb927.2.5530	Tb927.02.5530	POMP22	Mito.membrane	2821.9	0.1794	0.0295	0	0	0	0	0.3452	0.505607	0	0	1
Tb927.2.5540	Tb927.2.5540	Tb927.02.5540	hypothetical protein, conserved	ZUnknown	4338.2	0.291	1.06e-05	0	0	0	0	0.1542	0.999265	0	0	1
Tb927.2.5600	Tb927.2.5600	Tb927.02.5600	hypothetical protein, conserved	ZUnknown	4101.9	0.2801	4.54e-05	0	0	0	0	0.2721	0.902295	0	0	0
Tb927.2.5610	Tb927.2.5610	Tb927.02.5610	POMP22	Mito.membrane	2689.4	0.2367	0.00451	0	0	0	0	0.6135	0.154956	0	0	0
Tb927.2.5630	Tb927.2.5630	Tb927.02.5630	hypothetical protein, conserved	ZUnknown	960.9	0.3906	2.77e-05	0	0	0	0	0.3619	0.133518	0	0	0
Tb927.2.5650	Tb927.2.5650	Tb927.02.5650	hypothetical protein, conserved	ZUnknown	1002.3	-0.0374	0.766	0	0	0	0	0.09	0.999265	0	0	0
Tb927.2.5710	Tb927.2.5710	Tb927.02.5710	hypothetical protein	ZUnknown	0.7	1.6109	NA	0	0	0	0	0.2276	0.999265	0	0	1
Tb927.2.5720	Tb927.2.5720	Tb927.02.5720	hypothetical protein, predicted by Mitocarta	ZUnknown	27.5	-0.7378	0.0942	0	0	0	0	1.4903	1.90243e-07	1	0	1
Tb927.2.5750	Tb927.2.5750	Tb927.02.5750	tyrosyl-DNA Phosphodiesterase (Tdp1), putative	DNA	1442.5	0.157	0.0761	0	0	0	0	0.1141	0.922145	0	0	1
Tb927.2.5760	Tb927.2.5760	Tb927.02.5760	Flagellar Member 8 (FLAM8)	Cytoskeleton	18896.2	-0.4063	2.22e-10	0	0	0	0	1.0741	0.0185781	1	0	0
Tb927.2.5800	Tb927.2.5800	Tb927.02.5800	sedoheptulose-1,7-bisphosphatase (SBPase)	Glucose.glycerol	1687.4	-0.1786	0.0344	0	0	0	0	0.2837	0.436803	0	0	1
Tb927.2.5810	Tb927.2.5810	Tb927.02.5810	SPT6 transcription elongation	RNA.synthesis	6011.5	-0.135	0.107	0	0	0	0	0.0206	0.999265	0	0	1
Tb927.2.5820	Tb927.2.5820	Tb927.02.5820	hypothetical protein, conserved	ZUnknown	2958.8	-0.196	0.0206	0	0	0	0	-0.0417	0.999265	0	0	1
Tb927.2.5830	Tb927.2.5830	Tb927.02.5830	hypothetical protein, conserved	ZUnknown	761.2	-0.0288	0.842	0	0	0	0	-0.1927	0.999265	0	0	1
Tb927.2.5850	Tb927.2.5850	Tb927.02.5850	small nuclear ribonucleoprotein SmD2	RNA.processing	955.4	-0.2319	0.0134	0	0	0	0	-0.1965	0.979719	0	0	1
Tb927.2.5860	Tb927.2.5860	Tb927.02.5860	hypothetical protein, conserved	ZUnknown	4123.3	0.1974	0.0186	0	0	0	0	0.7321	0.422098	0	0	0
Tb927.2.5870	Tb927.2.5870	Tb927.02.5870	hypothetical protein, conserved	ZUnknown	5736.8	0.1179	0.124	0	0	0	0	0.6566	0.778844	0	0	0
Tb927.2.5890	Tb927.2.5890	Tb927.02.5890	hypothetical protein, conserved	ZUnknown	1222.8	-0.0194	0.874	0	0	0	0	-0.1107	0.979719	0	0	1
Tb927.2.5900	Tb927.2.5900	Tb927.02.5900	hypothetical protein, conserved	ZUnknown	2652.6	-0.1534	0.0574	0	0	0	0	-0.106	0.999265	0	0	1
Tb927.2.5910	Tb927.2.5910	Tb927.02.5910	40S ribosomal protein S13	Ribosome	8052.1	-0.0999	0.159	0	0	0	0	-0.3495	0.610397	0	0	1
Tb927.2.5930	Tb927.2.5930	Tb927.02.5930	hypothetical protein, conserved	Mito.pathway	1879.9	-0.0443	0.655	0	0	0	0	-0.1427	0.820996	0	0	1
Tb927.2.5950	Tb927.2.5950	Tb927.02.5950	hypothetical protein, conserved	ZUnknown	2023.7	-0.1091	0.193	0	0	0	0	0.0078	0.999265	0	0	1
Tb927.2.5970	Tb927.2.5970	Tb927.02.5970	hypothetical protein, conserved	ZUnknown	2149.4	0.2399	0.0018	0	0	0	0	-0.0178	0.999265	0	0	1
Tb927.2.6000	Tb927.2.6000	Tb927.02.6000	GPI phospholipase C	GPI.anchors	6020.3	-0.5036	2.59e-14	0	0	0	0	0.5188	0.556406	0	0	1
Tb927.2.6050	Tb927.2.6050	Tb927.02.6050	coatamer beta-prime subunit beta prime COP	Vesicular.transport	5958	-0.0155	0.874	0	0	0	0	-0.0002	0.999915	0	0	1
Tb927.2.6070	Tb927.2.6070	Tb927.02.6070	mitochondrial RNA binding complex 1 subunit (MRB6070)	Mito.RNA	1204.7	0.1858	0.0352	0	0	0	0	0.026	0.999265	0	0	1
Tb927.2.6080	Tb927.2.6080	Tb927.02.6080	hypothetical protein, conserved	ZUnknown	1600.4	0.0423	0.7	0	0	0	0	-0.0541	0.999265	0	0	1
Tb927.2.6090	Tb927.2.6090	Tb927.02.6090	60S ribosomal protein L44	Ribosome	4917.8	-0.0295	0.735	0	0	0	0	-0.2419	0.857437	0	0	1
Tb927.2.6100	Tb927.2.6100	Tb927.02.6100	hypothetical protein, conserved	ZUnknown	2106	-0.0487	0.614	0	0	0	0	0.33	0.912847	0	0	1
Tb927.2.6130	Tb927.2.6130	Tb927.02.6130	ABC transporter, putative	Transporter	2766.9	0.0171	0.867	0	0	0	0	0.0973	0.999265	0	0	1
Tb927.2.6230	Tb927.2.6230	Tb927.02.6230	iron/ascorbate oxidoreductase family protein, putative	Mito.pathway	6.9	-1.4377	0.114	0	0	0	0	-0.1769	0.999265	0	0	0
Tb927.2.6270	Tb927.2.6270	Tb927.02.6270	iron/ascorbate oxidoreductase family protein, putative	Mito.pathway	5.6	-0.7988	0.453	0	0	0	0	1.7454	0.999265	0	0	0
Tb927.2.6310	Tb927.2.6310	Tb927.02.6310	iron/ascorbate oxidoreductase family protein, putative	Mito.pathway	1.8	-1.1165	0.578	0	0	0	0	-0.484	0.999265	0	0	0
Tb927.2.6350	Tb927.2.6350	Tb927.02.6350	VSG pseudogene,variant surface glycoprotein, point mutation	VSG	58	-0.2864	0.407	0	0	0	0	0.3483	0.999265	0	0	0
Tb927.2.6372	Tb927.2.6372	Tb927.02.6372	VSG pseudogene, frameshifted and degenerate	VSG	0.5	0.9916	NA	0	0	0	0			0	0	0
Tb927.2.6375	Tb927.2.6375	Tb927.02.6375	VSG pseudogene, frameshifted pseudogene	VSG	0.1	0.649	NA	0	0	0	0			0	0	0
Tb927.2.6380	Tb927.2.6380	Tb927.02.6380	VSG pseudogene,variant surface glycoprotein, frameshift	VSG	0			0	0	0	0			0	0	0
Tb927.2.6390	Tb927.2.6390	Tb927.02.6390	VSG pseudogene,variant surface glycoprotein, degenerate	VSG	0			0	0	0	0			0	0	0
Tb927.2.6400	Tb927.2.6400	Tb927.02.6400	ESAG3 pseudogene	ESAG.pseudo	3.2	-0.0438	0.979	0	0	0	0			0	0	0
Tb927.2.6404	Tb927.2.6404	Tb927.02.6404	UDP-Gal or UDP-GlcNAc-dependent glycosyltransferase pseudogene	Pseudogene	1	-0.7654	NA	0	0	0	0			0	0	0
Tb927.2.6410	Tb927.2.6410	Tb927.02.6410	variant surface glycoprotein (VSG, atypical), putative	VSG	0			0	0	0	0			0	0	0
Tb927.2.6430	Tb927.2.6430	Tb927.02.6430	VSG pseudogene,variant surface glycoprotein, frameshift	VSG	0.1	0.649	NA	0	0	0	0			0	0	0
Tb927.2.6435	Tb927.2.6435	Tb927.02.6435	VSG pseudogene,variant surface glycoprotein, degenerate	VSG	0.1	0.649	NA	0	0	0	0			0	0	0
Tb927.3.100	Tb927.3.100	Tb927.03.0100	hypothetical protein, pseudogene	ZUnknown	0.2	-1.3564	NA	0	0	0	0			0	0	0
Tb927.3.110	Tb927.3.110	Tb927.03.0110	ESAG3 pseudogene	ESAG.pseudo	0.2	-1.674	NA	0	0	0	0			0	0	0
Tb927.3.120	Tb927.3.120	Tb927.03.0120	variant surface glycoprotein (VSG), putative	VSG	0			0	0	0	0			0	0	0
Tb927.3.130	Tb927.3.130	Tb927.03.0130	VSG pseudogene,variant surface glycoprotein, truncated	VSG	0			0	0	0	0			0	0	0
Tb927.3.140	Tb927.3.140	Tb927.03.0140	VSG pseudogene,variant surface glycoprotein, degenerate	VSG	0			0	0	0	0			0	0	0
Tb927.3.150	Tb927.3.150	Tb927.03.0150	variant surface glycoprotein (VSG), putative	VSG	0			0	0	0	0			0	0	0
Tb927.3.160	Tb927.3.160	Tb927.03.0160	ESAG3 pseudogene	ESAG.pseudo	20.3	-0.4326	0.437	0	0	0	0			0	0	0
Tb927.3.170	Tb927.3.170	Tb927.03.0170	VSG pseudogene,variant surface glycoprotein, degenerate	VSG	0			0	0	0	0			0	0	0
Tb927.3.180	Tb927.3.180	Tb927.03.0180	variant surface glycoprotein (VSG, atypical), putative	VSG	0.3	0.2965	NA	0	0	0	0			0	0	0
Tb927.3.190	Tb927.3.190	Tb927.03.0190	variant surface glycoprotein (VSG), putative	VSG	0.6	-1.3729	NA	0	0	0	0			0	0	0
Tb927.3.200	Tb927.3.200	Tb927.03.0200	VSG pseudogene,variant surface glycoprotein, truncated, degenerate	VSG	0.4	-0.2781	NA	0	0	0	0			0	0	0
Tb927.3.210	Tb927.3.210	Tb927.03.0210	variant surface glycoprotein (VSG, atypical), putative	VSG	0.2	-1.674	NA	0	0	0	0	-0.2984	0.999265	0	0	0
Tb927.3.220	Tb927.3.220	Tb927.03.0220	VSG pseudogene,variant surface glycoprotein, degenerate	VSG	0			0	0	0	0			0	0	0
Tb927.3.230	Tb927.3.230	Tb927.03.0230	VSG pseudogene,variant surface glycoprotein, degenerate	VSG	0.1	0.649	NA	0	0	0	0			0	0	0
Tb927.3.240	Tb927.3.240	Tb927.03.0240	VSG pseudogene,variant surface glycoprotein, degenerate	VSG	0.3	1.8348	NA	0	0	0	0			0	0	0
Tb927.3.250	Tb927.3.250	Tb927.03.0250	ESAG3 pseudogene	ESAG.pseudo	9.5	-0.7482	0.345	0	0	0	0			0	0	0
Tb927.3.260	Tb927.3.260	Tb927.03.0260	VSG pseudogene,variant surface glycoprotein, fragment	VSG	0			0	0	0	0			0	0	0
Tb927.3.270	Tb927.3.270	Tb927.03.0270	VSG pseudogene,variant surface glycoprotein, frameshift	VSG	0.1	0.649	NA	0	0	0	0			0	0	0
Tb927.3.280	Tb927.3.280	Tb927.03.0280	VSG pseudogene,variant surface glycoprotein, degenerate	VSG	0.1	-1.1512	NA	0	0	0	0			0	0	0
Tb927.3.290	Tb927.3.290	Tb927.03.0290	ESAG3 pseudogene	ESAG.pseudo	1.4	-1.3045	0.557	0	0	0	0			0	0	0
Tb927.3.300	Tb927.3.300	Tb927.03.0300	VSG pseudogene,variant surface glycoprotein, degenerate	VSG	0			0	0	0	0			0	0	0
Tb927.3.310	Tb927.3.310	Tb927.03.0310	VSG pseudogene,variant surface glycoprotein, degenerate	VSG	0.2	-0.2457	NA	0	0	0	0			0	0	0
Tb927.3.320	Tb927.3.320	Tb927.03.0320	VSG pseudogene,variant surface glycoprotein, point mutation	VSG	0			0	0	0	0			0	0	0
Tb927.3.330	Tb927.3.330	Tb927.03.0330	VSG pseudogene,variant surface glycoprotein, degenerate	VSG	0.1	0.649	NA	0	0	0	0			0	0	0
Tb927.3.340	Tb927.3.340	Tb927.03.0340	variant surface glycoprotein (VSG), putative	VSG	0			0	0	0	0			0	0	0
Tb927.3.350	Tb927.3.350	Tb927.03.0350	VSG pseudogene,variant surface glycoprotein, degenerate	VSG	0.3	-2.0232	NA	0	0	0	0			0	0	0
Tb927.3.360	Tb927.3.360	Tb927.03.0360	VSG pseudogene,variant surface glycoprotein, degenerate	VSG	0.1	-1.1512	NA	0	0	0	0			0	0	0
Tb927.3.370	Tb927.3.370	Tb927.03.0370	variant surface glycoprotein (VSG, atypical), putative	VSG	0.2	0.8173	NA	0	0	0	0			0	0	0
Tb927.3.380	Tb927.3.380	Tb927.03.0380	VSG pseudogene,variant surface glycoprotein, truncated, degenerate	VSG	0			0	0	0	0			0	0	0
Tb927.3.390	Tb927.3.390	Tb927.03.0390	VSG pseudogene,variant surface glycoprotein, degenerate	VSG	0.2	-0.2457	NA	0	0	0	0			0	0	0
Tb927.3.400	Tb927.3.400	Tb927.03.0400	VSG pseudogene,variant surface glycoprotein, degenerate	VSG	0.2	1.1806	NA	0	0	0	0			0	0	0
Tb927.3.410	Tb927.3.410	Tb927.03.0410	VSG pseudogene,variant surface glycoprotein, degenerate	VSG	0.4	-0.4255	NA	0	0	0	0			0	0	0
Tb927.3.420	Tb927.3.420	Tb927.03.0420	VSG pseudogene,variant surface glycoprotein, degenerate	VSG	0.1	-1.1512	NA	0	0	0	0			0	0	0
Tb927.3.430	Tb927.3.430	Tb927.03.0430	ESAG3 pseudogene	ESAG.pseudo	6.6	-0.3346	0.765	0	0	0	0			0	0	0
Tb927.3.440	Tb927.3.440	Tb927.03.0440	variant surface glycoprotein (VSG), putative	VSG	0.2	0.8157	NA	0	0	0	0			0	0	0
Tb927.3.450	Tb927.3.450	Tb927.03.0450	VSG pseudogene,variant surface glycoprotein, degenerate	VSG	0			0	0	0	0			0	0	0
Tb927.3.460	Tb927.3.460	Tb927.03.0460	ESAG3 pseudogene	ESAG.pseudo	12.4	-0.1585	0.859	0	0	0	0			0	0	0
Tb927.3.470	Tb927.3.470	Tb927.03.0470	VSG pseudogene,variant surface glycoprotein, point mutation	VSG	0			0	0	0	0			0	0	0
Tb927.3.490	Tb927.3.490	Tb927.03.0490	variant surface glycoprotein (VSG), putative	VSG	0.2	-1.3564	NA	0	0	0	0			0	0	0
Tb927.3.500	Tb927.3.500	Tb927.03.0500	VSG pseudogene,variant surface glycoprotein, degenerate	VSG	0			0	0	0	0			0	0	0
Tb927.3.510	Tb927.3.510	Tb927.03.0510	hypothetical protein, conserved	ZUnknown	30.7	-0.4122	0.367	0	0	0	0	0.264	0.999265	0	0	0
Tb927.3.520	Tb927.3.520	Tb927.03.0520	ESAG1, putative	ESAG	350.8	-0.1261	0.42	0	0	0	0	-0.4813	0.999265	0	0	0
Tb927.3.540	Tb927.3.540	Tb927.03.0540	ESAG1 pseudogene	ESAG.pseudo	0.3	-1.3529	NA	0	0	0	0			0	0	0
Tb927.3.550	Tb927.3.550	Tb927.03.0550	ESAG1 pseudogene	ESAG.pseudo	82.3	-0.4629	0.0929	0	0	0	0			0	0	0
Tb927.3.560	Tb927.3.560	Tb927.03.0560	ESAG11, putative	ESAG	1108.5	-0.1674	0.143	0	0	0	0			0	0	0
Tb927.3.570	Tb927.3.570	Tb927.03.0570	ESAG2, putative	ESAG	557.7	-0.5552	2.01e-05	0	0	0	0	0.4492	0.999265	0	0	0
Tb927.3.580.1	Tb927.3.580	Tb927.03.0580	leucine-rich repeat protein (LRRP)	LRRP	811.3	-0.1474	0.178	0	0	0	0	-0.0346	0.999265	0	0	1
Tb927.3.580.2	Tb927.3.580	Tb927.03.0580	leucine-rich repeat protein (LRRP)	LRRP	1179.4	-0.0831	0.429	0	0	0	0	-0.0346	0.999265	0	0	1
Tb927.3.585	Tb927.3.585	Tb927.03.0585	hypothetical protein	ZUnknown	545.2	0.0781	0.544	0	0	0	0	-0.195	0.999265	0	0	1
Tb927.3.600	Tb927.3.600	Tb927.03.0600	hypothetical protein	ZUnknown	395.3	0.1971	0.166	0	0	0	0	-0.6859	0.160352	0	0	1
Tb927.3.610	Tb927.3.610	Tb927.03.0610	N-acetyltransferase complex ARD1 subunit, putative	Enzyme	759.2	0.2066	0.0736	0	0	0	0	0.3448	0.992674	0	0	1
Tb927.3.620	Tb927.3.620	Tb927.03.0620	ATP-dependent DEAD/H RNA helicase, putative Dbp7, ribosome biogenesis?	rRNA.tRNA.process	1625	-0.1492	0.0767	0	0	0	0	-0.2009	0.999265	0	0	1
Tb927.3.640	Tb927.3.640	Tb927.03.0640	hypothetical protein, conserved	ZUnknown	2024.1	0.2169	0.00424	0	0	0	0	-0.0706	0.999265	0	0	1
Tb927.3.650	Tb927.3.650	Tb927.03.0650	hypothetical protein, conserved	ZUnknown	115.9	0.1199	0.643	0	0	0	0	0.2237	0.999265	0	0	1
Tb927.3.660	Tb927.3.660	Tb927.03.0660	hypothetical protein, conserved	ZUnknown	310.5	0.1755	0.286	0	0	0	0	-0.0596	0.999265	0	0	1
Tb927.3.670	Tb927.3.670	Tb927.03.0670	hypothetical protein	ZUnknown	688	0.0681	0.589	0	0	0	0	0.035	0.999265	0	0	1
Tb927.3.680	Tb927.3.680	Tb927.03.0680	cytochrome P450, putative	Mito.e.transport	751.3	-0.1214	0.272	0	0	0	0	-0.1459	0.969066	0	0	1
Tb927.3.690	Tb927.3.690	Tb927.03.0690	protein kinase, putative	Protein.kinase	1715.7	0.1604	0.0482	0	0	0	0	0.1941	0.945485	0	0	1
Tb927.3.700	Tb927.3.700	Tb927.03.0700	hypothetical protein, conserved, no clear yeast or human matches	ZUnknown	215.9	0.1224	0.517	0	0	0	0	-0.8901	0.138008	0	0	1
Tb927.3.710	Tb927.3.710	Tb927.03.0710	RING-variant domain containing protein, putative	ZUnknown	1603	0.0584	0.575	0	0	0	0	0.0486	0.999265	0	0	1
Tb927.3.720	Tb927.3.720	Tb927.03.0720	ZFP3	RNA.binding	3825.2	0.0599	0.491	0	0	0	0	0.081	0.999265	0	0	1
Tb927.3.730	Tb927.3.730	Tb927.03.0730	hypothetical protein, conserved	ZUnknown	1303	0.3168	0.00027	0	0	0	0	0.2437	0.999265	0	0	1
Tb927.3.740	Tb927.3.740	Tb927.03.0740	ZC3H5	RNA.binding	2028.4	0.0478	0.653	0	0	0	0	0.0447	0.999265	0	0	1
Tb927.3.750	Tb927.3.750	Tb927.03.0750	SET domain containing protein, putative	Mito.pathway	519.8	0.3788	0.00153	0	0	0	0	-0.1925	0.386629	0	0	1
Tb927.3.760	Tb927.3.760	Tb927.03.0760	hypothetical protein, conserved	ZUnknown	1200.1	0.0193	0.866	0	0	0	0	-0.0499	0.999265	0	0	1
Tb927.3.770	Tb927.3.770	Tb927.03.0770	Mitochondrial SSU ribosomal protein, putative	Mito.translation	637.1	0.2158	0.04	0	0	0	0	0.0124	0.999265	0	0	1
Tb927.3.780	Tb927.3.780	Tb927.03.0780	proteasome alpha 7 subunit (TbPSA7)	Ubiquitin.proteasome	1834.6	-0.1118	0.179	0	0	0	0	-0.1292	0.933011	0	0	1
Tb927.3.790	Tb927.3.790	Tb927.03.0790	ZC3H6	RNA.binding	667.4	0.0935	0.434	0	0	0	0	-0.0895	0.999265	0	0	1
Tb927.3.800	Tb927.3.800	Tb927.03.0800	Vacuolar iron transporter VIT1	Transporter	1464.8	0.204	0.0321	0	0	0	0	0.0204	0.999265	0	0	1
Tb927.3.810	Tb927.3.810	Tb927.03.0810	hypothetical protein, conserved	ZUnknown	684.9	0.2692	0.0139	0	0	0	0	-0.0929	0.999265	0	0	1
Tb927.3.820	Tb927.3.820	Tb927.03.0820	LSU ribosomal protein, mitochondrial, putative	Mito.translation	615.8	0.2267	0.0601	0	0	0	0	0.14	0.965118	0	0	1
Tb927.3.830	Tb927.3.830	Tb927.03.0830	flap endonuclease-1 (FEN-1), putative	DNA	1040.7	0.0234	0.854	0	0	0	0	-0.1513	0.8208	0	0	1
Tb927.3.840	Tb927.3.840	Tb927.03.0840	hypothetical protein, conserved	ZUnknown	832.9	0.0288	0.827	0	0	0	0	0.0627	0.999265	0	0	1
Tb927.3.850	Tb927.3.850	Tb927.03.0850	hypothetical protein, conserved	ZUnknown	1205	0.45	3.99e-08	0	0	0	0	0.274	0.760465	0	0	1
Tb927.3.860	Tb927.3.860	Tb927.03.0860	Acyl carrier protein, mitochondrial	Lipids	2063.2	0.1948	0.0795	0	0	0	0	0.0986	0.999265	0	0	1
Tb927.3.870	Tb927.3.870	Tb927.03.0870	SLBP2, like histone RNA hairpin binding proteins, binds to EIF4E2	RNA.binding	1435.2	-0.166	0.0504	0	0	0	0	0.2368	0.981925	0	0	1
Tb927.3.880	Tb927.3.880	Tb927.03.0880	Ankyrin repeats (3 copies), putative	ZUnknown	1193.6	0.152	0.0986	0	0	0	0	0.0133	0.999265	0	0	1
Tb927.3.890	Tb927.3.890	Tb927.03.0890	hypothetical protein, conserved	ZUnknown	824.4	0.2126	0.0367	0	0	0	0	0.1555	0.943374	0	0	1
Tb927.3.900	Tb927.3.900	Tb927.03.0900	PUB domain containing protein, putative	ZUnknown	1036.3	0.3332	0.000308	0	0	0	0	0.1319	0.97511	0	0	1
Tb927.3.910	Tb927.3.910	Tb927.03.0910	gamma-tubulin	Cytoskeleton	1288.6	0.167	0.0708	0	0	0	0	-0.0005	0.999915	0	0	1
Tb927.3.920	Tb927.3.920	Tb927.03.0920	hypothetical protein, conserved	ZUnknown	2734.2	0.21	0.00628	0	0	0	0	0.1052	0.999265	0	0	1
Tb927.3.930	Tb927.3.930	Tb927.03.0930	OADalpha outer arm dynein heavy chain	Cytoskeleton	71757.8	-0.186	0.00247	0	0	0	0	0.1287	0.999265	0	0	1
Tb927.3.940	Tb927.3.940	Tb927.03.0940	Complex 1 protein (LYR family), putative	Mito.e.transport	480.7	0.4977	1.25e-05	0	0	0	0	-0.2411	0.446041	0	0	1
Tb927.3.945	Tb927.3.945	Tb927.03.0945	hypothetical protein	ZUnknown	363.2	0.3001	0.0256	0	0	0	0	0.2777	0.704051	0	0	1
Tb927.3.950	Tb927.3.950	Tb927.03.0950	2OG-Fe(II) oxygenase superfamily, putative	Mito.pathway	1079.2	-0.0395	0.718	0	0	0	0	0.1808	0.857116	0	0	1
Tb927.3.960	Tb927.3.960	Tb927.03.0960	protein transport protein Sec61 gamma subunit, putative	Vesicular.transport	1308.5	-0.1136	0.233	0	0	0	0	0.0768	0.999265	0	0	1
Tb927.3.970	Tb927.3.970	Tb927.03.0970	Mitochondrial SSU ribosomal protein, putative	Mito.translation	1264.8	0.072	0.476	0	0	0	0	-0.1488	0.999265	0	0	1
Tb927.3.980	Tb927.3.980	Tb927.03.0980	hypothetical protein, conserved	ZUnknown	2049.6	-0.0314	0.744	0	0	0	0	-0.039	0.999265	0	0	1
Tb927.3.990	Tb927.3.990	Tb927.03.0990	hypothetical protein, conserved	ZUnknown	1056.5	0.2449	0.00818	0	0	0	0	0.2637	0.960746	0	0	1
Tb927.3.1000	Tb927.3.1000	Tb927.03.1000	frataxin	Mito.pathway	526.2	0.2027	0.153	0	0	0	0	-0.0123	0.999265	0	0	1
Tb927.3.1010	Tb927.3.1010	Tb927.03.1010	hypothetical protein, conserved, Trypanosoma-specific	ZUnknown	7303.9	0.3523	1.99e-06	0	0	0	0	0.451	0.150334	0	0	1
Tb927.3.1020	Tb927.3.1020	Tb927.03.1020	hypothetical protein, conserved	ZUnknown	1316	0.0889	0.335	0	0	0	0	0.239	0.874955	0	0	1
Tb927.3.1030	Tb927.3.1030	Tb927.03.1030	RBP28	RNA.binding	2508.1	-0.2009	0.0254	0	0	0	0	-0.0969	0.999265	0	0	1
Tb927.3.1050	Tb927.3.1050	Tb927.03.1050	transposase of Tn10	DNA	0.8	-1.4503	NA	0	0	0	0			0	0	0
Tb927.3.1060	Tb927.3.1060	Tb927.03.1060	3' end of CARP4, joined to Tb927.3.1040	Signalling	3550.2	-0.0103	0.912	0	0	0	0	0.0641	0.999265	0	0	1
Tb927.3.1070	Tb927.3.1070	Tb927.03.1070	RF1 Mitochondrial peptide chain release factor 1	Mito.translation	1552.7	0.3506	7.47e-06	0	0	0	0	-0.055	0.999265	0	0	1
Tb927.3.1080	Tb927.3.1080	Tb927.03.1080	POMP23	Mito.membrane	1562.1	0.4615	1.65e-09	0	0	0	0	0.0699	0.999265	0	0	1
Tb927.3.1085	Tb927.3.1085	Tb927.03.1085	hypothetical protein	ZUnknown	329.1	0.005	0.981	0	0	0	0	-0.058	0.999265	0	0	1
Tb927.3.1090	Tb927.3.1090	Tb927.03.1090	U1-24K small nuclear ribonucleoprotein	RNA.processing	493.2	-0.0668	0.674	0	0	0	0	-0.2857	0.26476	0	0	1
Tb927.3.1100	Tb927.3.1100	Tb927.03.1100	exonuclease, putative	ZUnknown	606.4	0.1096	0.4	0	0	0	0	-0.116	0.945776	0	0	1
Tb927.3.1110	Tb927.3.1110	Tb927.03.1110	flagellar transport protein, putative (PIFTA1)	Cytoskeleton	1697.5	0.0988	0.358	0	0	0	0	0.0372	0.999265	0	0	1
Tb927.3.1120	Tb927.3.1120	Tb927.03.1120	Ran or RTB2	Nuclear.transport	7741.8	-0.128	0.0578	0	0	0	0	-0.0275	0.999265	0	0	1
Tb927.3.1130	Tb927.3.1130	Tb927.03.1130	DNA polymerase delta subunit 2, putative	DNA	1488	0.2152	0.0089	0	0	0	0	0.0988	0.999265	0	0	1
Tb927.3.1140	Tb927.3.1140	Tb927.03.1140	Surp module, putative	ZUnknown	1109.5	0.0264	0.822	0	0	0	0	-0.0131	0.999265	0	0	1
Tb927.3.1150	Tb927.3.1150	Tb927.03.1150	Conserved hypothetical ATP binding protein, putative	ZUnknown	999.1	0.0021	0.988	0	0	0	0	0.036	0.999265	0	0	1
Tb927.3.1160	Tb927.3.1160	Tb927.03.1160	hypothetical protein, conserved	ZUnknown	570.4	0.1572	0.211	0	0	0	0	-0.1322	0.999265	0	0	1
Tb927.3.1170	Tb927.3.1170	Tb927.03.1170	TAP42-like family, putative	ZUnknown	1133.8	0.0248	0.836	0	0	0	0	-0.033	0.999265	0	0	1
Tb927.3.1180	Tb927.3.1180	Tb927.03.1180	hypothetical protein, conserved	ZUnknown	2078.1	0.1792	0.0214	0	0	0	0	-0.0105	0.999265	0	0	1
Tb927.3.1190	Tb927.3.1190	Tb927.03.1190	hypothetical protein, conserved	ZUnknown	8273.4	0.0222	0.785	0	0	0	0	-0.0131	0.999265	0	0	1
Tb927.3.1200.1	Tb927.3.1200	Tb927.03.1200	hypothetical protein, conserved	ZUnknown	1067.3	0.0121	0.925	0	0	0	0	0.1228	0.718691	0	0	1
Tb927.3.1200.2	Tb927.3.1200	Tb927.03.1200	hypothetical protein, conserved	ZUnknown	2437	0.0982	0.25	0	0	0	0	0.1228	0.718691	0	0	1
Tb927.3.1210	Tb927.3.1210	Tb927.03.1210	protein transport protein Sec24	Vesicular.transport	4200.7	0.0499	0.581	0	0	0	0	0.0233	0.999265	0	0	1
Tb927.3.1220	Tb927.3.1220	Tb927.03.1220	GIY-YIG catalytic domain containing protein, putative	ZUnknown	658.5	0.4449	5.93e-06	0	0	0	0	0.0932	0.999265	0	0	1
Tb927.3.1230	Tb927.3.1230	Tb927.03.1230	DCL2	RNA.degradation	2239.9	0.2174	0.00438	0	0	0	0	0.0301	0.999265	0	0	1
Tb927.3.1240	Tb927.3.1240	Tb927.03.1240	protein phosphatase 2A, putative	Protein.phosphatase	1235.3	0.3573	0.000123	0	0	0	0	0.0847	0.999265	0	0	1
Tb927.3.1250	Tb927.3.1250	Tb927.03.1250	RPB10 DNA-directed RNA polymerase I subunit	RNA.synthesis	484.8	0.2194	0.0886	0	0	0	0	-0.0913	0.999265	0	0	1
Tb927.3.1260	Tb927.3.1260	Tb927.03.1260	hypothetical protein, conserved	ZUnknown	689.6	0.0945	0.422	0	0	0	0	-0.0637	0.999265	0	0	1
Tb927.3.1270	Tb927.3.1270	Tb927.03.1270	PRP38 family, putative	ZUnknown	1420.4	0.1678	0.0729	0	0	0	0	-0.0049	0.999265	0	0	1
Tb927.3.1280	Tb927.3.1280	Tb927.03.1280	NPL4 family, putative	Ubiquitin.proteasome	1417.8	0.0425	0.697	0	0	0	0	0.1524	0.802731	0	0	1
Tb927.3.1290	Tb927.3.1290	Tb927.03.1290	CUL4 cullin	Ubiquitin.proteasome	3442.6	0.1559	0.0384	0	0	0	0	-0.0083	0.999265	0	0	1
Tb927.3.1300	Tb927.3.1300	Tb927.03.1300	hypothetical protein, conserved, no domains, no yeast or human match	Vesicular.transport	1296.4	-0.1615	0.15	0	0	0	0	-0.3044	0.880748	0	0	1
Tb927.3.1310.1	Tb927.3.1310	Tb927.03.1310	hypothetical protein, conserved	ZUnknown	4269	0.1761	0.0104	0	0	0	0	-0.2528	0.810809	0	0	1
Tb927.3.1310.2	Tb927.3.1310	Tb927.03.1310	hypothetical protein, conserved	ZUnknown	4802.3	0.1979	0.00274	0	0	0	0	-0.2528	0.810809	0	0	1
Tb927.3.1320	Tb927.3.1320	Tb927.03.1320	hypothetical protein, conserved	ZUnknown	4795.6	0.179	0.00914	0	0	0	0	0.0252	0.999265	0	0	1
Tb927.3.1330	Tb927.3.1330	Tb927.03.1330	hypothetical protein, conserved	ZUnknown	3205	0.2607	0.00105	0	0	0	0	0.0785	0.999265	0	0	1
Tb927.3.1340	Tb927.3.1340	Tb927.03.1340	CBP66, nuclear cap-binding complex (ZC3H7)	Nuclear.transport	1951.4	0.1555	0.0563	0	0	0	0	0.0592	0.999265	0	0	1
Tb927.3.1350	Tb927.3.1350	Tb927.03.1350	hypothetical protein, conserved	ZUnknown	1454.1	-0.3088	6.07e-05	0	0	0	0	-0.3942	0.832139	0	0	1
Tb927.3.1360	Tb927.3.1360	Tb927.03.1360	cytosine-specific DNA methylase, putative	DNA	1544.6	0.0401	0.693	0	0	0	0	-0.0662	0.999265	0	0	1
Tb927.3.1370	Tb927.3.1370	Tb927.03.1370	40S ribosomal protein S25	Ribosome	5566	-0.0237	0.835	0	0	0	0	-0.2841	0.985724	0	0	1
Tb927.3.1380	Tb927.3.1380	Tb927.03.1380	ATP synthase subunit beta, mitochondrial (ATPB)	Mito.e.transport	6327.3	0.4245	2.16e-11	0	0	0	0	-0.1881	0.941729	0	0	1
Tb927.3.1390	Tb927.3.1390	Tb927.03.1390	LMBR1-like membrane protein, putative	ZUnknown	1832.9	0.103	0.266	0	0	0	0	0.1334	0.912847	0	0	1
Tb927.3.1400	Tb927.3.1400	Tb927.03.1400	alpha-tubulin N-acetyltransferase, putative	Cytoskeleton	943.6	0.0153	0.906	0	0	0	0	0.0403	0.999265	0	0	1
Tb927.3.1420	Tb927.3.1420	Tb927.03.1420	hypothetical protein, conserved, trypanosome-specific, C-terminal Kelch motif	Cytoskeleton	13262.4	0.1483	0.0234	0	0	0	0	0.0683	0.999265	0	0	1
Tb927.3.1430	Tb927.3.1430	Tb927.03.1430	chaperone DNAj, putative, J46	Chaperone	1004.8	0.2362	0.0257	0	0	0	0	-0.0314	0.999265	0	0	1
Tb927.3.1440	Tb927.3.1440	Tb927.03.1440	AAA ATPase, putative,Spastin, putative	Enzyme	2229.4	0.1215	0.118	0	0	0	0	0.0617	0.999265	0	0	1
Tb927.3.1450	Tb927.3.1450	Tb927.03.1450	CorA-like Mg2+ transporter protein, putative	ZUnknown	763.7	0.1527	0.19	0	0	0	0	-0.0188	0.999265	0	0	0
Tb927.3.1460	Tb927.3.1460	Tb927.03.1460	hypothetical protein	ZUnknown	521.1	-0.0633	0.686	0	0	0	0	-0.2034	0.999265	0	0	0
Tb927.3.1525	Tb927.3.1525	Tb927.03.1525	hypothetical protein	ZUnknown	683.1	-0.0714	0.618	0	0	0	0	0.1439	0.999265	0	0	0
Tb927.3.1530	Tb927.3.1530	Tb927.03.1530	CorA-like Mg2+ transporter protein, putative	ZUnknown	925.8	0.36	0.000469	0	0	0	0	-0.0894	0.999265	0	0	1
Tb927.3.1540	Tb927.3.1540	Tb927.03.1540	CAAX prenyl protease 2, putative,peptidase with unknown catalytic mechanism (family U48)	Protease	391.4	0.2178	0.0886	0	0	0	0	0.0949	0.999265	0	0	1
Tb927.3.1550	Tb927.3.1550	Tb927.03.1550	Rab3 GTPase-activating protein catalytic subunit, putative	Signalling	2676.1	-0.1359	0.0673	0	0	0	0	0.1987	0.934269	0	0	1
Tb927.3.1560	Tb927.3.1560	Tb927.03.1560	TIF2 ttaggg binding factor interacting	DNA	1154.9	0.1119	0.286	0	0	0	0	0.2152	0.852423	0	0	1
Tb927.3.1570	Tb927.3.1570	Tb927.03.1570	protein kinase, LBPK3	Protein.kinase	1926.2	0.3533	1.07e-06	0	0	0	0	0.4706	0.762009	0	0	1
Tb927.3.1580	Tb927.3.1580	Tb927.03.1580	hypothetical protein, conserved	ZUnknown	1467.9	0.114	0.194	0	0	0	0	0.0511	0.999265	0	0	1
Tb927.3.1590	Tb927.3.1590	Tb927.03.1590	mitochondrial RNA binding complex 1 subunit (MRB1590)	Mito.RNA	3257.8	-0.148	0.0461	0	0	0	0	-0.0927	0.999265	0	0	1
Tb927.3.1600	Tb927.3.1600	Tb927.03.1600	Tim10/DDP family zinc finger	Mito.biogenesis	577.4	0.2563	0.0516	0	0	0	0	-0.1742	0.999265	0	0	1
Tb927.3.1610	Tb927.3.1610	Tb927.03.1610	CLK kinase	Cell.cycle	2020.3	-0.043	0.67	0	0	0	0	0.7511	0.115679	0	0	1
Tb927.3.1620	Tb927.3.1620	Tb927.03.1620	ER-golgi trafficking TRAPP I complex 85 kDa subunit, putative	Vesicular.transport	6992.1	0.3009	1.23e-06	0	0	0	0	0.181	0.999265	0	0	1
Tb927.3.1630	Tb927.3.1630	Tb927.03.1630	CK1 casein kinase 1	Protein.kinase	1222.9	0.007	0.954	0	0	0	0	2.0623	3.08821e-07	1	0	1
Tb927.3.1640	Tb927.3.1640	Tb927.03.1640	hypothetical protein	ZUnknown	674.3	-0.0639	0.769	0	0	0	0	1.597	0.989812	0	0	1
Tb927.3.1650	Tb927.3.1650	Tb927.03.1650	hypothetical protein	ZUnknown	561.2	-0.2794	0.0805	0	0	0	0	2.1538	0.626624	0	0	1
Tb927.3.1660	Tb927.3.1660	Tb927.03.1660	hypothetical protein, conserved	ZUnknown	3613.8	-0.0391	0.653	0	0	0	0	2.3681	2.35206e-12	1	0	1
Tb927.3.1670	Tb927.3.1670	Tb927.03.1670	hypothetical protein, conserved	ZUnknown	3103	-0.0097	0.922	0	0	0	0	0.0344	0.999265	0	0	1
Tb927.3.1680	Tb927.3.1680	Tb927.03.1680	eIF3F	Translation	3491.9	-0.1701	0.0277	0	0	0	0	-0.1349	0.999265	0	0	1
Tb927.3.1690	Tb927.3.1690	Tb927.03.1690	Mitochondrial ATP synthase subunit, putative	Mito.pathway	1222.2	0.4084	1.06e-06	0	0	0	0	-0.1467	0.999265	0	0	1
Tb927.3.1700	Tb927.3.1700	Tb927.03.1700	DAG acyltransferase	Lipids	934.7	-0.0481	0.691	0	0	0	0	-0.3761	0.25286	0	0	1
Tb927.3.1710	Tb927.3.1710	Tb927.03.1710	mitochondrial ribosomal protein l24	Mito.translation	1235.5	0.0973	0.31	0	0	0	0	-0.237	0.936152	0	0	1
Tb927.3.1730	Tb927.3.1730	Tb927.03.1730	hypothetical protein, conserved	Mito.pathway	645.6	0.2506	0.0213	0	0	0	0	-0.0671	0.999265	0	0	1
Tb927.3.1740	Tb927.3.1740	Tb927.03.1740	hypothetical protein, conserved	ZUnknown	2463.1	-0.0757	0.355	0	0	0	0	-0.1209	0.913675	0	0	1
Tb927.3.1750	Tb927.3.1750	Tb927.03.1750	rev7, putative,mitotic spindle checkpoint component, Mad2-like HORMA domain	Cell.cycle	411.3	0.0761	0.635	0	0	0	0	-0.067	0.999265	0	0	1
Tb927.3.1760	Tb927.3.1760	Tb927.03.1760	chaperone DNAj, putative, J36	Chaperone	1108.5	-0.0994	0.366	0	0	0	0	-0.0896	0.999265	0	0	1
Tb927.3.1770	Tb927.3.1770	Tb927.03.1770	leucine-rich repeat protein (LRRP)	LRRP	2458.1	0.0252	0.804	0	0	0	0	0.0631	0.999265	0	0	1
Tb927.3.1780	Tb927.3.1780	Tb927.03.1780	LSm8	RNA.processing	396.1	0.0312	0.859	0	0	0	0	-0.0353	0.999265	0	0	1
Tb927.3.1790	Tb927.3.1790	Tb927.03.1790	pyruvate dehydrogenase E1 beta subunit, putative	Mito.citric.acid.cycle	3311	0.3288	2.28e-05	0	0	0	0	-0.1105	0.999265	0	0	1
Tb927.3.1800	Tb927.3.1800	Tb927.03.1800	hypothetical protein, conserved,linked to nifurtimox efficacy and potential resistance, Arg-rich domain at C-terminus	ZUnknown	5433.4	0.015	0.863	0	0	0	0	-0.0941	0.999265	0	0	1
Tb927.3.1810	Tb927.3.1810	Tb927.03.1810	hypothetical protein, conserved, no domains, no yeast or human match	ZUnknown	912.2	0.1667	0.0834	0	0	0	0	0.0352	0.999265	0	0	1
Tb927.3.1820	Tb927.3.1820	Tb927.03.1820	mitochondrial RNA binding complex 1 subunit (MRB1820)	Mito.RNA	1102.8	-0.0028	0.984	0	0	0	0	0.3241	0.746499	0	0	1
Tb927.3.1830	Tb927.3.1830	Tb927.03.1830	TbRMI1, DNA recombination and antigenic switching	DNA	990.7	0.2199	0.0286	0	0	0	0	0.1821	0.710851	0	0	1
Tb927.3.1840	Tb927.3.1840	Tb927.03.1840	3-oxo-5-alpha-steroid 4-dehydrogenase, putative	Sterols	6234.9	0.5512	5.61e-21	0	0	0	0	0.2993	0.979719	0	0	1
Tb927.3.1850	Tb927.3.1850	Tb927.03.1850	Protein kinase domain containing protein, putative	ZUnknown	1866.7	-0.0501	0.611	0	0	0	0	0.3262	0.397032	0	0	1
Tb927.3.1860	Tb927.3.1860	Tb927.03.1860	ATP-grasp domain containing protein, putative	ZUnknown	1738.9	0.0436	0.651	0	0	0	0	0.315	0.99506	0	0	1
Tb927.3.1870.1	Tb927.3.1870	Tb927.03.1870	CHAP domain containing protein, putative	ZUnknown	463.3	0.5296	1.81e-05	0	0	0	0	0.2916	0.670503	0	0	1
Tb927.3.1870.2	Tb927.3.1870	Tb927.03.1870	CHAP domain containing protein, putative	ZUnknown	501.3	0.5329	7.01e-06	0	0	0	0	0.2916	0.670503	0	0	1
Tb927.3.1880	Tb927.3.1880	Tb927.03.1880	hypothetical protein, conserved, trypanosome-specific	ZUnknown	1563.6	0.2434	0.00518	0	0	0	0	0.0784	0.999265	0	0	1
Tb927.3.1890	Tb927.3.1890	Tb927.03.1890	cytochrome c oxidase assembly protein, putative	Mito.e.transport	914	0.3442	0.00029	0	0	0	0	-0.1117	0.95615	0	0	1
Tb927.3.1900	Tb927.3.1900	Tb927.03.1900	hypothetical protein, conserved	Cytoskeleton	4323.3	-0.0045	0.963	0	0	0	0	0.3378	0.991116	0	0	1
Tb927.3.1910	Tb927.3.1910	Tb927.03.1910	SLBP1, histone RNA binding domain 259-326	RNA.binding	2235.8	0.1933	0.0102	0	0	0	0	2.0041	1.31194e-13	1	0	1
Tb927.3.1920	Tb927.3.1920	Tb927.03.1920	NOT5	RNA.degradation	4967.7	-0.2621	0.000847	0	0	0	0	-0.0617	0.999265	0	0	1
Tb927.3.1930	Tb927.3.1930	Tb927.03.1930	CDC40 / PRP17	RNA.processing	1006.8	0.1843	0.0478	0	0	0	0	-0.178	0.999265	0	0	1
Tb927.3.1940	Tb927.3.1940	Tb927.03.1940	hypothetical protein, possible component of cytochorome oxidase complex	Mito.e.transport	649.4	0.0514	0.701	0	0	0	0	-0.0876	0.999265	0	0	1
Tb927.3.1955	Tb927.3.1955	Tb927.03.1955	Vacuolar protein sorting-associated protein 55 homolog	Vesicular.transport	447.3	0.4194	0.000593	0	0	0	0	0.5197	0.110553	0	0	1
Tb927.3.1960	Tb927.3.1960	Tb927.03.1960	hypothetical protein, conserved	ZUnknown	361.2	-0.0473	0.787	0	0	0	0	-0.0784	0.999265	0	0	1
Tb927.3.1970	Tb927.3.1970	Tb927.03.1970	DNA / pantothenate metabolism flavoprotein, putative	ZUnknown	673.7	0.1216	0.304	0	0	0	0	-0.1179	0.979719	0	0	1
Tb927.3.1980	Tb927.3.1980	Tb927.03.1980	hypothetical protein, conserved	ZUnknown	824	0.1971	0.0467	0	0	0	0	-0.0092	0.999265	0	0	1
Tb927.3.1990	Tb927.3.1990	Tb927.03.1990	Tetratricopeptide repeat, putative	ZUnknown	1503.2	0.1151	0.215	0	0	0	0	0.2125	0.80921	0	0	1
Tb927.3.2000	Tb927.3.2000	Tb927.03.2000	RBP21	RNA.binding	526.8	0.2935	0.00752	0	0	0	0	-0.0512	0.999265	0	0	1
Tb927.3.2010	Tb927.3.2010	Tb927.03.2010	hypothetical protein, conserved	Mito.pathway	1555.9	0.0624	0.52	0	0	0	0	0.0033	0.999265	0	0	1
Tb927.3.2020	Tb927.3.2020	Tb927.03.2020	KIN-F kinesin	Cytoskeleton	1953.6	-0.0927	0.326	0	0	0	0	-0.0034	0.999265	0	0	1
Tb927.3.2030.2	Tb927.3.2030	Tb927.03.2030	acylphosphatase, putative	Lipids	272.3	0.1137	0.532	0	0	0	0	0.0597	0.999265	0	0	1
Tb927.3.2030.1	Tb927.3.2030	Tb927.03.2030	acylphosphatase, putative	Lipids	252.8	0.1353	0.464	0	0	0	0	0.0597	0.999265	0	0	1
Tb927.3.2040	Tb927.3.2040	Tb927.03.2040	kinesin, Kinesin-16	Cytoskeleton	2961.5	0.1964	0.00721	0	0	0	0	0.2319	0.95615	0	0	1
Tb927.3.2050	Tb927.3.2050	Tb927.03.2050	hypothetical protein, conserved, no domains, poly(Q) tracts, K-specific	Mito.DNA	6987.5	0.0316	0.708	0	0	0	0	0.5728	0.514939	0	0	1
Tb927.3.2060	Tb927.3.2060	Tb927.03.2060	protein kinase, putative	Protein.kinase	1208.1	-0.087	0.382	0	0	0	0	-0.0386	0.999265	0	0	1
Tb927.3.2070	Tb927.3.2070	Tb927.03.2070	hypothetical protein, conserved	ZUnknown	3409.3	-0.1201	0.0974	0	0	0	0	-0.1499	0.999265	0	0	1
Tb927.3.2080	Tb927.3.2080	Tb927.03.2080	hypothetical protein, conserved	Mito.pathway	844.6	-0.03	0.819	0	0	0	0	-0.3245	0.209493	0	0	1
Tb927.3.2090	Tb927.3.2090	Tb927.03.2090	aminopeptidase P1, putative,metallo-peptidase, Clan MG, Family M24	Protease	1477.4	0.1003	0.273	0	0	0	0	-0.135	0.999265	0	0	1
Tb927.3.2100	Tb927.3.2100	Tb927.03.2100	hypothetical protein, conserved	ZUnknown	1982.7	-0.1169	0.165	0	0	0	0	0.0373	0.999265	0	0	1
Tb927.3.2110	Tb927.3.2110	Tb927.03.2110	TFIIF-stimulated CTD phosphatase, putative	Protein.phosphatase	1348.5	0.0664	0.564	0	0	0	0	0.4933	0.722748	0	0	1
Tb927.3.2120	Tb927.3.2120	Tb927.03.2120	hypothetical protein, conserved	ZUnknown	648.9	-0.0004	0.998	0	0	0	0	-0.0667	0.999265	0	0	1
Tb927.3.2130	Tb927.3.2130	Tb927.03.2130	RNA pseudouridylate synthase, putative	Mito.pathway	1556.7	0.1288	0.124	0	0	0	0	0.0123	0.999265	0	0	1
Tb927.3.2150	Tb927.3.2150	Tb927.03.2150	protein phosphatase 2C, putative	Protein.phosphatase	724.8	0.5049	2.14e-07	0	0	0	0	-0.1845	0.625372	0	0	1
Tb927.3.2160	Tb927.3.2160	Tb927.03.2160	Rieske-like [2Fe-2S] domain containing protein, putative	ZUnknown	1080.3	0.3342	0.00022	0	0	0	0	0.0644	0.999265	0	0	1
Tb927.3.2170	Tb927.3.2170	Tb927.03.2170	EF2 translation elongation factor EF-2, putative	Translation	3151.8	-0.1586	0.028	0	0	0	0	-0.0322	0.999265	0	0	1
Tb927.3.2180	Tb927.3.2180	Tb927.03.2180	Mitochondrial ATP synthase subunit, putative	Mito.pathway	1250.8	0.2826	0.000615	0	0	0	0	-0.0448	0.999265	0	0	1
Tb927.3.2190	Tb927.3.2190	Tb927.03.2190	RNA triphosphatase (TbCET1) forms CAP0 on SL	RNA.processing	867.6	0.1198	0.275	0	0	0	0	-0.0361	0.999265	0	0	1
Tb927.3.2200	Tb927.3.2200	Tb927.03.2200	TPR repeat, putative	ZUnknown	763.8	0.0947	0.464	0	0	0	0	0.1022	0.999265	0	0	1
Tb927.3.2210	Tb927.3.2210	Tb927.03.2210	KIF-1 binding protein C terminal, putative	ZUnknown	1562.8	0.0386	0.715	0	0	0	0	-0.1392	0.989045	0	0	1
Tb927.3.2220	Tb927.3.2220	Tb927.03.2220	eIF3j	Translation	902.8	0.0372	0.753	0	0	0	0	-0.0914	0.999265	0	0	1
Tb927.3.2230	Tb927.3.2230	Tb927.03.2230	succinyl-CoA synthetase alpha subunit, putative	Mito.citric.acid.cycle	1703.4	-0.3636	1.04e-06	0	0	0	0	0.0622	0.999265	0	0	1
Tb927.3.2240	Tb927.3.2240	Tb927.03.2240	BRO1-like domain containing protein, putative	ZUnknown	744	0.0525	0.676	0	0	0	0	-0.246	0.838908	0	0	1
Tb927.3.2250	Tb927.3.2250	Tb927.03.2250	hypothetical protein, conserved	ZUnknown	202.6	0.2051	0.242	0	0	0	0	-0.1309	0.999265	0	0	1
Tb927.3.2260	Tb927.3.2260	Tb927.03.2260	Mitochondrial SSU ribosomal protein, putative	Mito.translation	396	0.1849	0.179	0	0	0	0	-0.1613	0.999265	0	0	1
Tb927.3.2270	Tb927.3.2270	Tb927.03.2270	hypothetical protein, conserved	ZUnknown	1118.1	0.1661	0.0677	0	0	0	0	-0.2943	0.496779	0	0	1
Tb927.3.2280	Tb927.3.2280	Tb927.03.2280	vacuolar sorting protein 33 , putative	Lysosome	1518	0.0832	0.432	0	0	0	0	-0.062	0.999265	0	0	1
Tb927.3.2290	Tb927.3.2290	Tb927.03.2290	chaperone DNAj, putative, J32	Chaperone	780.3	-0.0099	0.953	0	0	0	0	0.0455	0.999265	0	0	1
Tb927.3.2300	Tb927.3.2300	Tb927.03.2300	DNL zinc finger, putative	Mito.pathway	566.7	0.1252	0.299	0	0	0	0	-0.0523	0.999265	0	0	1
Tb927.3.2310	Tb927.3.2310	Tb927.03.2310	flagellar component,PACRGA	Cytoskeleton	2526.2	-0.0727	0.38	0	0	0	0	0.081	0.989766	0	0	1
Tb927.3.2320	Tb927.3.2320	Tb927.03.2320	COP9 signalosome complex subunit 2, putative	Vesicular.transport	1012.2	0.0651	0.567	0	0	0	0	-0.1086	0.999265	0	0	1
Tb927.3.2330	Tb927.3.2330	Tb927.03.2330	KKT17 Kinetochore protein	Cell.cycle	1633.1	0.0741	0.448	0	0	0	0	0.1311	0.958663	0	0	1
Tb927.3.2340	Tb927.3.2340	Tb927.03.2340	PEX2 peroxin-2,glycosome import protein (gim1)	Glycosome	520.4	0.0912	0.477	0	0	0	0	0.1841	0.518951	0	0	1
Tb927.3.2350	Tb927.3.2350	Tb927.03.2350	hypothetical protein, conserved	ZUnknown	356.8	0.1898	0.176	0	0	0	0	0.0693	0.999265	0	0	1
Tb927.3.2360	Tb927.3.2360	Tb927.03.2360	hypothetical protein, conserved	ZUnknown	668.3	0.3954	0.000575	0	0	0	0	0.3357	0.179396	0	0	1
Tb927.3.2370	Tb927.3.2370	Tb927.03.2370	hypothetical protein, conserved	Mito.pathway	476.2	0.3836	0.00128	0	0	0	0	-0.067	0.999265	0	0	1
Tb927.3.2380	Tb927.3.2380	Tb927.03.2380	hypothetical protein, conserved	ZUnknown	167.2	-0.0351	0.889	0	0	0	0	0.3027	0.913675	0	0	1
Tb927.3.2390	Tb927.3.2390	Tb927.03.2390	hypothetical protein, conserved	ZUnknown	1257.7	0.2665	0.00266	0	0	0	0	-0.0205	0.999265	0	0	1
Tb927.3.2400	Tb927.3.2400	Tb927.03.2400	palmitoyl acyltransferase 10, putative	Lipids	740.4	0.5234	1.59e-07	0	0	0	0	0.0814	0.999265	0	0	1
Tb927.3.2410	Tb927.3.2410	Tb927.03.2410	PEX10 peroxisome assembly protein	Glycosome	827.4	0.0822	0.519	0	0	0	0	0.107	0.999265	0	0	1
Tb927.3.2420	Tb927.3.2420	Tb927.03.2420	Microsomal signal peptidase 12 kDa subunit (SPC12), putative	ZUnknown	1883.2	0.1663	0.0537	0	0	0	0	0.4409	0.528342	0	0	1
Tb927.3.2430	Tb927.3.2430	Tb927.03.2430	Vacuolar sorting protein 9 (VPS9) domain containing protein, putative	ZUnknown	2515.3	0.0202	0.842	0	0	0	0	0.1013	0.999265	0	0	1
Tb927.3.2440	Tb927.3.2440	Tb927.03.2440	AEK1	Protein.kinase	1174.1	0.2972	0.00307	0	0	0	0	0.5435	0.418016	0	0	1
Tb927.3.2470	Tb927.3.2470	Tb927.03.2470	PUF8	rRNA.tRNA.process	1697.4	-0.4062	5.16e-08	0	0	0	0	-0.1377	0.999265	0	0	1
Tb927.3.2475	Tb927.3.2475	Tb927.03.2475	hypothetical protein	ZUnknown	998.9	-0.1227	0.3	0	0	0	0	0.1488	0.999265	0	0	1
Tb927.3.2477	Tb927.3.2477	Tb927.03.2477	hypothetical protein	ZUnknown	229.9	-0.3165	0.072	0	0	0	0	-1.0086	0.0374524	0	1	1
Tb927.3.2480	Tb927.3.2480	Tb927.03.2480	Arv1-like family, putative	ZUnknown	909.2	0.3644	0.000101	0	0	0	0	0.0436	0.999265	0	0	1
Tb927.3.2490	Tb927.3.2490	Tb927.03.2490	P-loop nucloside phosphate hydrolase, PH domain-like	RNA.degradation	6768.9	0.1754	0.0053	0	0	0	0	0.1694	0.966631	0	0	1
Tb927.3.2500	Tb927.3.2500	Tb927.03.2500	Trypanosomal VSG domain containing protein, putative	ZUnknown	171.2	0.4744	0.00726	0	0	0	0	1.9596	2.39684e-12	1	0	0
Tb927.3.2510.2-p1-CDS1	Tb927.3.2510	Tb927.03.2510	ESAG2, putative	ESAG	317	-0.348	0.0164	0	0	0	0			0	0	0
Tb927.3.2510.1-p1-CDS1	Tb927.3.2510	Tb927.03.2510	ESAG2, putative	ESAG	461.8	-0.2537	0.0412	0	0	0	0			0	0	0
Tb927.3.2520	Tb927.3.2520	Tb927.03.2520	ESAG1, putative	ESAG	25.1	-0.1307	0.818	0	0	0	0			0	0	0
Tb927.3.2530	Tb927.3.2530	Tb927.03.2530	ESAG11 pseudogene	ESAG.pseudo	17.6	-0.2733	0.679	0	0	0	0			0	0	0
Tb927.3.2540.1	Tb927.3.2540	Tb927.03.2540	variant surface glycoprotein (VSG)-related, putative	VSG	16.2	0.0837	0.914	0	0	0	0	1.4443	0.999265	0	0	0
Tb927.3.2540.2	Tb927.3.2540	Tb927.03.2540	variant surface glycoprotein (VSG)-related, putative	VSG	16.6	0.1512	0.84	0	0	0	0	1.4443	0.999265	0	0	0
Tb927.3.2550	Tb927.3.2550	Tb927.03.2550	hypothetical protein, conserved	ZUnknown	18.3	-0.0333	0.962	0	0	0	0	2.2364	0.999265	0	0	1
Tb927.3.2560	Tb927.3.2560	Tb927.03.2560	hypothetical protein, conserved	ZUnknown	22.1	0.7702	0.129	0	0	0	0			0	0	1
Tb927.3.2570	Tb927.3.2570	Tb927.03.2570	hypothetical protein, conserved	ZUnknown	25.3	0.5869	0.235	0	0	0	0			0	0	0
Tb927.3.2580	Tb927.3.2580	Tb927.03.2580	Fam5 cell surface protein	Membrane.protein	46.6	-0.0369	0.932	0	0	0	0			0	0	1
Tb927.3.2590	Tb927.3.2590	Tb927.03.2590	hypothetical protein	ZUnknown	92.8	0.1979	0.472	0	0	0	0	0.1329	0.999265	0	0	1
Tb927.3.2600	Tb927.3.2600	Tb927.03.2600	ATP-dependent DEAD/H RNA helicase, putative, no clear yeast homologue	RNA.helicase	21395.4	-0.3577	1.32e-10	0	0	0	0	-0.1135	0.999265	0	0	1
Tb927.3.2610	Tb927.3.2610	Tb927.03.2610	GPI inositol deacylase 2 (GPIdeAc2)	GPI.anchors	2710.8	0.0011	0.991	0	0	0	0	0.0187	0.999265	0	0	1
Tb927.3.2620.1	Tb927.3.2620	Tb927.03.2620	hypothetical protein, conserved	ZUnknown	5750.9	-0.1036	0.18	0	0	0	0	-0.3263	0.669982	0	0	1
Tb927.3.2620.2	Tb927.3.2620	Tb927.03.2620	hypothetical protein, conserved	ZUnknown	5780.4	-0.1028	0.181	0	0	0	0	-0.3263	0.669982	0	0	1
Tb927.3.2630	Tb927.3.2630	Tb927.03.2630	hypothetical protein, conserved	ZUnknown	1704.9	-0.1404	0.094	0	0	0	0	-0.288	0.308158	0	0	1
Tb927.3.2640	Tb927.3.2640	Tb927.03.2640	hypothetical protein, conserved	ZUnknown	712.9	-0.1858	0.113	0	0	0	0	-0.1628	0.999265	0	0	1
Tb927.3.2650	Tb927.3.2650	Tb927.03.2650	cytochrome c oxidase copper chaperone, putative	Mito.e.transport	349.7	-0.1021	0.551	0	0	0	0	-0.2273	0.78608	0	0	1
Tb927.3.2660	Tb927.3.2660	Tb927.03.2660	TatD related DNase, putative	ZUnknown	1602.4	-0.0058	0.959	0	0	0	0	-0.2194	0.690675	0	0	1
Tb927.3.2670	Tb927.3.2670	Tb927.03.2670	hypothetical protein, conserved	Mito.pathway	711.7	-0.2226	0.0317	0	0	0	0	-0.1268	0.995008	0	0	1
Tb927.3.2680	Tb927.3.2680	Tb927.03.2680	Ubiquitin-like domain containing protein, putative	ZUnknown	1321.2	-0.4094	1.2e-07	0	0	0	0	-0.2258	0.760122	0	0	1
Tb927.3.2690	Tb927.3.2690	Tb927.03.2690	serine/threonine-protein kinase, putative,protein kinase, putative	Protein.kinase	3109.2	-0.2324	0.00125	0	0	0	0	0.1264	0.999265	0	0	1
Tb927.3.2700	Tb927.3.2700	Tb927.03.2700	hypothetical protein, conserved	ZUnknown	866.3	-0.1819	0.0738	0	0	0	0	-0.3309	0.705466	0	0	1
Tb927.3.2710	Tb927.3.2710	Tb927.03.2710	6-phosphofructo-2-kinase/fructose-2,6-bisphosphatase	Glucose.glycerol	2414.1	-0.2365	0.00134	0	0	0	0	-0.1151	0.999265	0	0	1
Tb927.3.2720	Tb927.3.2720	Tb927.03.2720	hypothetical protein	ZUnknown	1049.8	-0.3885	7.27e-06	0	0	0	0	-0.0451	0.999265	0	0	1
Tb927.3.2730	Tb927.3.2730	Tb927.03.2730	hypothetical protein, trypanosoma specific	ZUnknown	4916.2	-0.204	0.00223	0	0	0	0	-0.2587	0.941729	0	0	1
Tb927.3.2740	Tb927.3.2740	Tb927.03.2740	hypothetical protein, conserved	ZUnknown	1370	-0.3771	3e-06	0	0	0	0	-0.2268	0.879444	0	0	1
Tb927.3.2750	Tb927.3.2750	Tb927.03.2750	hypothetical protein, conserved	ZUnknown	1493	-0.3995	3.97e-07	0	0	0	0	-0.4844	0.391678	0	0	1
Tb927.3.2760	Tb927.3.2760	Tb927.03.2760	hypothetical protein, conserved	ZUnknown	3256.5	-0.1386	0.0614	0	0	0	0	-0.2022	0.866195	0	0	1
Tb927.3.2770.1	Tb927.3.2770	Tb927.03.2770	hypothetical protein, conserved	ZUnknown	3072.8	-0.1215	0.103	0	0	0	0	-0.2572	0.945776	0	0	1
Tb927.3.2770.2	Tb927.3.2770	Tb927.03.2770	hypothetical protein, conserved	ZUnknown	3135.6	-0.1204	0.104	0	0	0	0	-0.2572	0.945776	0	0	1
Tb927.3.2780	Tb927.3.2780	Tb927.03.2780	hypothetical protein, conserved	ZUnknown	3508.1	-0.0835	0.338	0	0	0	0	-0.1909	0.947458	0	0	1
Tb927.3.2790	Tb927.3.2790	Tb927.03.2790	leucine-rich repeat protein (LRRP)	LRRP	2122	-0.099	0.264	0	0	0	0	-0.1145	0.999265	0	0	1
Tb927.3.2800	Tb927.3.2800	Tb927.03.2800	hypothetical protein	ZUnknown	811.3	-0.0997	0.352	0	0	0	0	-0.1217	0.999265	0	0	1
Tb927.3.2810	Tb927.3.2810	Tb927.03.2810	hypothetical protein, conserved	ZUnknown	3421.3	-0.3598	2.9e-07	0	0	0	0	-0.3548	0.901371	0	0	1
Tb927.3.2820	Tb927.3.2820	Tb927.03.2820	TFIIF-stimulated CTD phosphatase, putative	Protein.phosphatase	1626.6	-0.2037	0.012	0	0	0	0	-0.1118	0.999265	0	0	1
Tb927.3.2830	Tb927.3.2830	Tb927.03.2830	brix domain containing protein, putative	ZUnknown	863.7	-0.5412	3e-09	0	0	0	0	-0.4785	0.00165973	0	0	1
Tb927.3.2840	Tb927.3.2840	Tb927.03.2840	inorganic pyrophosphatase, putative	Phosphatase	565.9	-0.0973	0.51	0	0	0	0	-0.1103	0.999265	0	0	1
Tb927.3.2850	Tb927.3.2850	Tb927.03.2850	Got1/Sft2-like family, putative	ZUnknown	429.7	0.1378	0.306	0	0	0	0	-0.1343	0.999265	0	0	1
Tb927.3.2860	Tb927.3.2860	Tb927.03.2860	hypothetical protein, conserved	ZUnknown	588.8	-0.2369	0.0335	0	0	0	0	-0.3782	0.581079	0	0	1
Tb927.3.2870	Tb927.3.2870	Tb927.03.2870	multicopper oxidase, putative	ZUnknown	2413.7	-0.2392	0.00741	0	0	0	0	-0.2082	0.87946	0	0	1
Tb927.3.2880	Tb927.3.2880	Tb927.03.2880	Mitochondrial ATP synthase subunit, putative	Mito.pathway	474.3	0.4149	0.00637	0	0	0	0	-0.4719	0.000638447	0	0	1
Tb927.3.2890	Tb927.3.2890	Tb927.03.2890	radial spoke protein RSP10, putative	Cytoskeleton	1643.3	-0.2345	0.403	0	0	0	0	-0.2368	0.965118	0	0	1
Tb927.3.2900	Tb927.3.2900	Tb927.03.2900	EF-2 alpha, elongation initiation factor 2 alpha subunit,	Translation	3429.3	-0.576	5.91e-13	0	0	0	0	-0.4418	0.653961	0	0	1
Tb927.3.2910	Tb927.3.2910	Tb927.03.2910	hypothetical protein, conserved	ZUnknown	443.1	-0.0177	0.925	0	0	0	0	0.1808	0.974712	0	0	1
Tb927.3.2920	Tb927.3.2920	Tb927.03.2920	hypothetical protein, conserved	ZUnknown	470.5	0.3408	0.0039	0	0	0	0	0.4138	0.708812	0	0	1
Tb927.3.2930	Tb927.3.2930	Tb927.03.2930	RBP6	RNA.binding	451.8	0.1825	0.245	0	0	0	0	1.0313	0.53437	0	0	1
Tb927.3.2940	Tb927.3.2940	Tb927.03.2940	hypothetical protein, conserved, no clear yeast or human matches	ZUnknown	408.8	-0.1127	0.443	0	0	0	0	-0.0539	0.999265	0	0	1
Tb927.3.2950	Tb927.3.2950	Tb927.03.2950	ribonuclease inhibitor- like protein LRRP-like	LRRP	2923	-0.0244	0.793	0	0	0	0	-0.1324	0.945485	0	0	1
Tb927.3.2960	Tb927.3.2960	Tb927.03.2960	inosine-adenosine-guanosine-nucleosidehydrolase (IAGNH)	Nucleotides	7778.8	-0.5216	2.6e-18	0	0	0	0	0.8881	0.248027	0	0	1
Tb927.3.2970	Tb927.3.2970	Tb927.03.2970	hypothetical protein, conserved	ZUnknown	399.4	0.3649	0.004	0	0	0	0	-0.1095	0.999265	0	0	1
Tb927.3.2980	Tb927.3.2980	Tb927.03.2980	mitochondrial carrier protein, MCP17	Mito.transport	681.7	-0.0824	0.506	0	0	0	0	-0.1032	0.999265	0	0	1
Tb927.3.2990	Tb927.3.2990	Tb927.03.2990	hypothetical protein, conserved	ZUnknown	460.3	0.091	0.536	0	0	0	0	0.028	0.999265	0	0	1
Tb927.3.3000	Tb927.3.3000	Tb927.03.3000	flagellar transport protein, putative (PIFTC3)	Cytoskeleton	4729.8	0.0167	0.847	0	0	0	0	-0.0015	0.999901	0	0	1
Tb927.3.3010	Tb927.3.3010	Tb927.03.3010	hypothetical protein, conserved	ZUnknown	310.5	0.0801	0.652	0	0	0	0	0.0177	0.999265	0	0	1
Tb927.3.3020	Tb927.3.3020	Tb927.03.3020	actin-like protein, putative	Cytoskeleton	631.2	0.045	0.741	0	0	0	0	-0.0458	0.999265	0	0	1
Tb927.3.3030	Tb927.3.3030	Tb927.03.3030	BOH1, hook complex protein, resemblance to myosin	Cytoskeleton	1832.1	-0.0383	0.705	0	0	0	0	-0.0265	0.999265	0	0	1
Tb927.3.3040	Tb927.3.3040	Tb927.03.3040	Right handed beta helix region, putative	ZUnknown	1416.3	0.1812	0.0409	0	0	0	0	0.0648	0.999265	0	0	1
Tb927.3.3050	Tb927.3.3050	Tb927.03.3050	hypothetical protein, conserved	ZUnknown	1141.8	0.0826	0.41	0	0	0	0	-0.1904	0.514939	0	0	1
Tb927.3.3070	Tb927.3.3070	Tb927.03.3070	3', 5'-cyclic nucleotide phosphodiesterase, putative (PDEC)	Signalling	2405	0.3822	1.41e-08	0	0	0	0	1.0696	0.00748928	1	0	1
Tb927.3.3080	Tb927.3.3080	Tb927.03.3080	NEK6 protein kinase	Protein.kinase	1273.6	0.0149	0.898	0	0	0	0	0.0237	0.999265	0	0	1
Tb927.3.3090	Tb927.3.3090	Tb927.03.3090	helicase, putative	DNA	2332.1	0.0399	0.657	0	0	0	0	-0.1465	0.999265	0	0	1
Tb927.3.3110	Tb927.3.3110	Tb927.03.3110	Nuclear condensing complex subunits, C-term domain containing protein, putative	ZUnknown	4273.8	-0.006	0.949	0	0	0	0	0.0051	0.999265	0	0	1
Tb927.3.3120	Tb927.3.3120	Tb927.03.3120	hypothetical protein, conserved	ZUnknown	1319	0.0543	0.608	0	0	0	0	-0.1228	0.999265	0	0	1
Tb927.3.3130	Tb927.3.3130	Tb927.03.3130	POMP24	Mito.membrane	10358.1	-0.2248	0.000903	0	0	0	0	-0.0736	0.999265	0	0	1
Tb927.3.3140	Tb927.3.3140	Tb927.03.3140	hypothetical protein, conserved	ZUnknown	365.3	0.133	0.375	0	0	0	0	-0.0375	0.999265	0	0	1
Tb927.3.3150	Tb927.3.3150	Tb927.03.3150	hypothetical protein, conserved	ZUnknown	1261.5	0.1223	0.199	0	0	0	0	-0.0956	0.965118	0	0	1
Tb927.3.3160	Tb927.3.3160	Tb927.03.3160	PAP1 poly(A) polymerase. Cis-spliced. cytosolic	RNA.processing	1096.6	-0.1282	0.165	0	0	0	0	0.0137	0.999265	0	0	1
Tb927.3.3170	Tb927.3.3170	Tb927.03.3170	hypothetical protein, conserved	Cytoskeleton	2430.4	-0.0444	0.649	0	0	0	0	0.0328	0.999265	0	0	1
Tb927.3.3180	Tb927.3.3180	Tb927.03.3180	TbNup98 Connect to basket	Nuclear.transport	2391.9	-0.2485	0.00102	0	0	0	0	-0.0202	0.999265	0	0	0
Tb927.3.3190	Tb927.3.3190	Tb927.03.3190	NEK7 protein kinase	Protein.kinase	4846.6	-0.1687	0.0134	0	0	0	0	0.9739	0.0318138	0	0	1
Tb927.3.3200	Tb927.3.3200	Tb927.03.3200	Domain of unknown function (DUF4586), putative	ZUnknown	2385.4	0.2741	0.000831	0	0	0	0	0.0327	0.999265	0	0	1
Tb927.3.3210	Tb927.3.3210	Tb927.03.3210	hypothetical protein	ZUnknown	648.1	-0.4554	4.49e-05	0	0	0	0	-0.0312	0.999265	0	0	1
Tb927.3.3220	Tb927.3.3220	Tb927.03.3220	CTR9, part of PAF complex	RNA.synthesis	2837.4	-0.1217	0.182	0	0	0	0	-0.0425	0.999265	0	0	1
Tb927.3.3230	Tb927.3.3230	Tb927.03.3230	NOL1/NOP2/sun family, putative	ZUnknown	1083.2	-0.0979	0.409	0	0	0	0	-0.102	0.999265	0	0	1
Tb927.3.3240	Tb927.3.3240	Tb927.03.3240	hypothetical protein, conserved	ZUnknown	545.3	0.3989	0.000798	0	0	0	0	-0.0843	0.999265	0	0	1
Tb927.3.3250	Tb927.3.3250	Tb927.03.3250	hypothetical protein, conserved	ZUnknown	641.2	-0.0781	0.577	0	0	0	0	-0.1944	0.999265	0	0	1
Tb927.3.3260	Tb927.3.3260	Tb927.03.3260	hypothetical protein, conserved, kinetoplastid-specific, poly(E) repeats	ZUnknown	751.9	-0.1375	0.206	0	0	0	0	-0.1779	0.999265	0	0	1
Tb927.3.3280	Tb927.3.3280	Tb927.03.3280	vacuolar protein sorting-associated protein 4, putative (VPS4)	Lysosome	895.4	-0.1632	0.111	0	0	0	0	0.0635	0.999265	0	0	1
Tb927.3.3290	Tb927.3.3290	Tb927.03.3290	protein kinase, putative	Protein.kinase	530.4	0.0224	0.887	0	0	0	0	-0.1549	0.850283	0	0	1
Tb927.3.3300	Tb927.3.3300	Tb927.03.3300	FAZ19 flagellar attachment zone protein	Cytoskeleton	7078.2	-0.1112	0.174	0	0	0	0	0.1871	0.999265	0	0	1
Tb927.3.3310	Tb927.3.3310	Tb927.03.3310	60S ribosomal protein L13	Ribosome	10266.4	-0.0618	0.453	0	0	0	0	-0.3231	0.76597	0	0	1
Tb927.3.3320	Tb927.3.3320	Tb927.03.3320	60S ribosomal protein L13	Ribosome	11429.9	-0.0429	0.617	0	0	0	0	-0.3601	0.651143	0	0	0
Tb927.3.3330	Tb927.3.3330	Tb927.03.3330	HSP20 heat shock protein 20, putative	Mito.biogenesis	888.1	0.0579	0.621	0	0	0	0	-0.0311	0.999265	0	0	1
Tb927.3.3350	Tb927.3.3350	Tb927.03.3350	hypothetical protein, conserved	ZUnknown	1658.3	-0.0886	0.402	0	0	0	0	0.1128	0.999265	0	0	1
Tb927.3.3360	Tb927.3.3360	Tb927.03.3360	acyltransferase, putative	Lipids	1619.6	-0.0634	0.525	0	0	0	0	-0.1102	0.999265	0	0	1
Tb927.3.3370	Tb927.3.3370	Tb927.03.3370	hypothetical protein, conserved	ZUnknown	1303.8	0.0326	0.769	0	0	0	0	0.0607	0.999265	0	0	1
Tb927.3.3380	Tb927.3.3380	Tb927.03.3380	TFIIF-stimulated CTD phosphatase, putative	Protein.phosphatase	1307.2	-0.1079	0.284	0	0	0	0	0.1906	0.999265	0	0	1
Tb927.3.3390	Tb927.3.3390	Tb927.03.3390	Trypanosome-specific kinesin family 2	Cytoskeleton	1235.6	0.0864	0.374	0	0	0	0	-0.0087	0.999265	0	0	0
Tb927.3.3400	Tb927.3.3400	Tb927.03.3400	kinesin, putative	Cytoskeleton	777.4	0.0154	0.911	0	0	0	0	-0.113	0.945485	0	0	0
Tb927.3.3410	Tb927.3.3410	Tb927.03.3410	aspartyl aminopeptidase, putative,metallo-peptidase, Clan MH, Family M20	Protease	2023.8	0.0253	0.807	0	0	0	0	-0.0543	0.999265	0	0	1
Tb927.3.3420	Tb927.3.3420	Tb927.03.3420	hypothetical protein (pseudogene),hypothetical protein, point mutation	ZUnknown	27	-0.0306	0.959	0	0	0	0	-0.2497	0.999265	0	0	0
Tb927.3.3430	Tb927.3.3430	Tb927.03.3430	hypothetical protein, conserved	ZUnknown	13.7	0.4436	0.532	0	0	0	0	0.5363	0.989252	0	0	0
Tb927.3.3440	Tb927.3.3440	Tb927.03.3440	phytanoyl-CoA dioxygenase (PhyH), putative	ZUnknown	948.7	0.3378	0.00343	0	0	0	0	0.0185	0.999265	0	0	1
Tb927.3.3450	Tb927.3.3450	Tb927.03.3450	ARL3A	Cytoskeleton	6838	-0.3514	3.54e-08	0	0	0	0	0.0302	0.999265	0	0	1
Tb927.3.3460	Tb927.3.3460	Tb927.03.3460	SDH5 succinate dehydrogenase (complex II) subunit	Mito.e.transport	1508.3	0.2949	0.000228	0	0	0	0	0.0849	0.999265	0	0	1
Tb927.3.3470	Tb927.3.3470	Tb927.03.3470	cytochrome b5, putative (CYB5)	Mito.e.transport	395.4	0.1611	0.233	0	0	0	0	0.0776	0.999265	0	0	1
Tb927.3.3480	Tb927.3.3480	Tb927.03.3480	U2 small nuclear ribonucleoprotein B, putative (RBP36 U2SNRNPB, U2B''	RNA.processing	372.3	0.138	0.33	0	0	0	0	0.0309	0.999265	0	0	1
Tb927.3.3490	Tb927.3.3490	Tb927.03.3490	high mobility group protein, putative (TDP1)	Chromatin	1902.1	-0.2942	0.00989	0	0	0	0	0.1875	0.999265	0	0	1
Tb927.3.3500	Tb927.3.3500	Tb927.03.3500	hypothetical protein, conserved	ZUnknown	1537.8	0.2461	0.00286	0	0	0	0	0.0394	0.999265	0	0	1
Tb927.3.3510	Tb927.3.3510	Tb927.03.3510	hypothetical protein, conserved	ZUnknown	682.4	-0.2075	0.0701	0	0	0	0	-0.2154	0.999265	0	0	1
Tb927.3.3520	Tb927.3.3520	Tb927.03.3520	POMP25	Mito.membrane	472.6	0.0075	0.962	0	0	0	0	-0.0413	0.999265	0	0	1
Tb927.3.3530	Tb927.3.3530	Tb927.03.3530	hypothetical protein, conserved	ZUnknown	666.8	0.0978	0.406	0	0	0	0	0.003	0.999265	0	0	1
Tb927.3.3540	Tb927.3.3540	Tb927.03.3540	TbNup53b Inner ring, FG Nup facing both sides	Nuclear.transport	1789.9	-0.0032	0.979	0	0	0	0	0.0136	0.999265	0	0	1
Tb927.3.3550	Tb927.3.3550	Tb927.03.3550	hypothetical protein, conserved	ZUnknown	2984.4	0.0856	0.295	0	0	0	0	0.3672	0.436207	0	0	1
Tb927.3.3560	Tb927.3.3560	Tb927.03.3560	U-box domain containing protein, putative	ZUnknown	6432	-0.1581	0.0199	0	0	0	0	0.0676	0.999265	0	0	1
Tb927.3.3570	Tb927.3.3570	Tb927.03.3570	hypothetical protein, conserved, no clear yeast or human matches	ZUnknown	227.8	0.3756	0.0381	0	0	0	0	-0.0135	0.999265	0	0	1
Tb927.3.3580	Tb927.3.3580	Tb927.03.3580	lipophosphoglycan biosynthetic protein, putative (LPG3)=GRP94 ER chaperone	Glycans	9034.6	0.4471	7.67e-15	0	0	0	0	0.179	0.999265	0	0	1
Tb927.3.3590	Tb927.3.3590	Tb927.03.3590	U3 small nucleolar ribonucleoprotein protein MPP10, putative	rRNA.tRNA.process	1528.3	-0.2204	0.0346	0	0	0	0	-0.2296	0.931915	0	0	1
Tb927.3.3600	Tb927.3.3600	Tb927.03.3600	hypothetical protein	ZUnknown	385.5	-0.0108	0.949	0	0	0	0	-0.1093	0.99828	0	0	1
Tb927.3.3610	Tb927.3.3610	Tb927.03.3610	PEX7 peroxisomal targeting signal type 2 receptor	Glycosome	1655.3	0.1703	0.066	0	0	0	0	0.1484	0.725809	0	0	1
Tb927.3.3620	Tb927.3.3620	Tb927.03.3620	hypothetical protein, conserved	ZUnknown	499	0.1182	0.379	0	0	0	0	0.0442	0.999265	0	0	1
Tb927.3.3630	Tb927.3.3630	Tb927.03.3630	EF-TS Mitochondrial elongation factor ts	Mito.translation	468.6	0.3676	0.00106	0	0	0	0	-0.0661	0.999265	0	0	1
Tb927.3.3640	Tb927.3.3640	Tb927.03.3640	FG-GAP repeat protein, putative,intergrin alpha chain protein, putative	Cytoskeleton	1476.3	0.0112	0.926	0	0	0	0	0.0096	0.999265	0	0	1
Tb927.3.3650	Tb927.3.3650	Tb927.03.3650	hypothetical protein, conserved	ZUnknown	1621.5	0.0144	0.898	0	0	0	0	0.1282	0.999265	0	0	1
Tb927.3.3660	Tb927.3.3660	Tb927.03.3660	NADH-ubiquinone oxidoreductase complex I subunit, putative	Mito.e.transport	798.3	0.519	3.28e-07	0	0	0	0	-0.1276	0.995008	0	0	1
Tb927.3.3670	Tb927.3.3670	Tb927.03.3670	TRRM3	RNA.binding	1625.3	-0.3675	2.88e-05	0	0	0	0	-0.3084	0.727617	0	0	1
Tb927.3.3680	Tb927.3.3680	Tb927.03.3680	hypothetical protein, conserved	Mito.pathway	449	0.1477	0.285	0	0	0	0	0.0815	0.999265	0	0	1
Tb927.3.3690	Tb927.3.3690	Tb927.03.3690	flagellar radial spoke protein-like, putative	Cytoskeleton	5184.8	0.1641	0.0319	0	0	0	0	0.1885	0.95615	0	0	1
Tb927.3.3700	Tb927.3.3700	Tb927.03.3700	hypothetical protein	ZUnknown	178.7	-0.0281	0.904	0	0	0	0	-0.6364	0.25286	0	0	1
Tb927.3.3710	Tb927.3.3710	Tb927.03.3710	Scavenger mRNA decapping enzyme C-term binding, putative	ZUnknown	615.1	0.2838	0.0135	0	0	0	0	0.0071	0.999265	0	0	1
Tb927.3.3720	Tb927.3.3720	Tb927.03.3720	Golgi vesicular membrane trafficking protein, putative	Vesicular.transport	463.9	0.4743	2.64e-05	0	0	0	0	0.2493	0.824354	0	0	1
Tb927.3.3730	Tb927.3.3730	Tb927.03.3730	ABC transporter, putative	Transporter	4227.4	0.4121	6.91e-10	0	0	0	0	0.3169	0.774031	0	0	1
Tb927.3.3740	Tb927.3.3740	Tb927.03.3740	Zinc-finger double-stranded RNA-binding, putative	ZUnknown	1275.6	-0.2091	0.0212	0	0	0	0	0.0086	0.999265	0	0	1
Tb927.3.3750	Tb927.3.3750	Tb927.03.3750	paraflagellar rod protein PFC7	Cytoskeleton	2698.7	-0.4041	1.28e-07	0	0	0	0	0.1894	0.999265	0	0	1
Tb927.3.3760	Tb927.3.3760	Tb927.03.3760	tryparedoxin (TRYP1)	Redox	2621.5	-0.3315	5.12e-06	0	0	0	0	-0.7144	0.999265	0	0	1
Tb927.3.3770	Tb927.3.3770	Tb927.03.3770	paraflagellar rod protein PFC6	Cytoskeleton	1069.9	-0.1479	0.214	0	0	0	0	0.3765	0.00211962	0	0	1
Tb927.3.3780	Tb927.3.3780	Tb927.03.3780	tryparedoxin	Redox	3059.3	-0.3257	2.89e-06	0	0	0	0	0.0241	0.999265	0	0	0
Tb927.3.3790	Tb927.3.3790	Tb927.03.3790	hypothetical protein, conserved, EF hand	ZUnknown	1089.5	-0.0904	0.476	0	0	0	0	0.034	0.999265	0	0	0
Tb927.3.3800.1	Tb927.3.3800	Tb927.03.3800	hypothetical protein, conserved	ZUnknown	2440.9	-0.2013	0.0052	0	0	0	0	-0.0562	0.999265	0	0	1
Tb927.3.3800.2	Tb927.3.3800	Tb927.03.3800	hypothetical protein, conserved	ZUnknown	2550.9	-0.1911	0.00853	0	0	0	0	-0.0562	0.999265	0	0	1
Tb927.3.3810	Tb927.3.3810	Tb927.03.3810	Etoposide-induced protein 2.4 (EI24), putative	ZUnknown	577	0.1671	0.16	0	0	0	0	-0.0729	0.999265	0	0	1
Tb927.3.3820	Tb927.3.3820	Tb927.03.3820	hypothetical protein, conserved	ZUnknown	1584.7	0.1362	0.0964	0	0	0	0	0.0333	0.999265	0	0	1
Tb927.3.3830	Tb927.3.3830	Tb927.03.3830	hypothetical protein, conserved	ZUnknown	964.2	-0.2172	0.0402	0	0	0	0	-0.0642	0.999265	0	0	1
Tb927.3.3840	Tb927.3.3840	Tb927.03.3840	Family of unknown function (DUF572), putative	ZUnknown	617.5	0.0777	0.669	0	0	0	0	0.0591	0.999265	0	0	1
Tb927.3.3850	Tb927.3.3850	Tb927.03.3850	Sec23-binding domain of Sec16, matches yeast proline-rich domain proteins associated with actin organisation	Vesicular.transport	4625.8	-0.1263	0.0782	0	0	0	0	0.1069	0.999265	0	0	1
Tb927.3.3860	Tb927.3.3860	Tb927.03.3860	lipase, putative,triacylglycerol lipase, putative	Lipids	3496.7	0.2519	0.000399	0	0	0	0	-0.0542	0.999265	0	0	1
Tb927.3.3870	Tb927.3.3870	Tb927.03.3870	lipase domain protein, putative	Lipids	5523.2	0.1665	0.0093	0	0	0	0	0.1726	0.999265	0	0	1
Tb927.3.3880	Tb927.3.3880	Tb927.03.3880	hypothetical protein, conserved	ZUnknown	660	-0.1263	0.342	0	0	0	0	-0.0702	0.999265	0	0	1
Tb927.3.3890	Tb927.3.3890	Tb927.03.3890	hypothetical protein, conserved	Mito.pathway	684.8	-0.1136	0.391	0	0	0	0	-0.1914	0.768914	0	0	1
Tb927.3.3900	Tb927.3.3900	Tb927.03.3900	carnitine O-palmitoyltransferase II, putative (CPT II)	Lipids	3379.2	0.1185	0.191	0	0	0	0	0.8255	0.0622666	0	0	1
Tb927.3.3910	Tb927.3.3910	Tb927.03.3910	RNApol Rpc34 family, pol III subunit, likely homologue of yeast RPC34	RNA.synthesis	701.4	-0.0555	0.691	0	0	0	0	-0.1152	0.999265	0	0	1
Tb927.3.3920	Tb927.3.3920	Tb927.03.3920	AUK2 serine/threonine-protein kinase	Protein.kinase	999.5	-0.0564	0.62	0	0	0	0	-0.0815	0.999265	0	0	1
Tb927.3.3940	Tb927.3.3940	Tb927.03.3940	DRBD11	RNA.binding	4251.7	-0.391	9.38e-09	0	0	0	0	0.6998	0.513702	0	0	1
Tb927.3.3950	Tb927.3.3950	Tb927.03.3950	hypothetical protein, conserved	ZUnknown	1498.1	-0.2162	0.0197	0	0	0	0	-0.1208	0.999265	0	0	1
Tb927.3.3970	Tb927.3.3970	Tb927.03.3970	RNA binding protein, putative, LYAR-type C2HC zinc finger domain	RNA.binding	1595.3	-0.2969	0.000383	0	0	0	0	0.0269	0.999265	0	0	1
Tb927.3.3980	Tb927.3.3980	Tb927.03.3980	hypothetical protein, conserved	ZUnknown	1139	-0.1219	0.206	0	0	0	0	0.0173	0.999265	0	0	1
Tb927.3.3990	Tb927.3.3990	Tb927.03.3990	KREPB6	Mito.RNA	664	-0.1203	0.292	0	0	0	0	0.0221	0.999265	0	0	1
Tb927.3.4000	Tb927.3.4000	Tb927.03.4000	Adaptin complex AP1 sigma subunit	Vesicular.transport	1744.4	0.2337	0.00591	0	0	0	0	0.277	0.912009	0	0	1
Tb927.3.4005	Tb927.3.4005	Tb927.03.4005	hypothetical protein	ZUnknown	166	-0.5079	0.0497	0	0	0	0	0.6821	0.27623	0	0	1
Tb927.3.4010	Tb927.3.4010	Tb927.03.4010	hypothetical protein	ZUnknown	218.4	0.3056	0.072	0	0	0	0	1.1223	0.00136384	1	0	1
Tb927.3.4020	Tb927.3.4020	Tb927.03.4020	PI4 kinase	Signalling	5888.7	0.0997	0.156	0	0	0	0	0.1699	0.999265	0	0	1
Tb927.3.4030	Tb927.3.4030	Tb927.03.4030	hypothetical protein, conserved	Mito.pathway	4023.4	0.0325	0.754	0	0	0	0	-0.0887	0.999265	0	0	1
Tb927.3.4040	Tb927.3.4040	Tb927.03.4040	Ankyrin repeats (3 copies), putative	ZUnknown	3462.5	0.1226	0.13	0	0	0	0	0.0209	0.999265	0	0	1
Tb927.3.4050	Tb927.3.4050	Tb927.03.4050	hypothetical protein, conserved	ZUnknown	401.9	0.2842	0.0358	0	0	0	0	-0.0551	0.999265	0	0	1
Tb927.3.4060	Tb927.3.4060	Tb927.03.4060	asparagine synthase, putative	ZUnknown	1701.3	0.1126	0.226	0	0	0	0	-0.1079	0.999265	0	0	1
Tb927.3.4070	Tb927.3.4070	Tb927.03.4070	pyruvate transporter PT1	Transporter	31924.9	-0.5044	6.46e-21	0	0	0	0	0.1294	0.991116	0	0	0
Tb927.3.4080	Tb927.3.4080	Tb927.03.4080	pyruvate transporter PT2	Transporter	7458.1	0.0869	0.269	0	0	0	0	-0.3667	0.318836	0	0	0
Tb927.3.4090	Tb927.3.4090	Tb927.03.4090	pyruvate transporter PT3	Transporter	6739.1	-0.1422	0.0267	0	0	0	0	-0.0962	0.999265	0	0	0
Tb927.3.4100	Tb927.3.4100	Tb927.03.4100	pyruvate transporter PT4	Transporter	13580.6	-0.3757	1.71e-08	0	0	0	0	0.1324	0.999265	0	0	0
Tb927.3.4110	Tb927.3.4110	Tb927.03.4110	pyruvate transporter PT5	Transporter	10319.2	-0.4129	2.9e-13	0	0	0	0	0.3159	0.452049	0	0	0
Tb927.3.4120	Tb927.3.4120	Tb927.03.4120	hypothetical protein, conserved	ZUnknown	2199.5	0.0082	0.936	0	0	0	0	0.0597	0.999265	0	0	1
Tb927.3.4130	Tb927.3.4130	Tb927.03.4130	hypothetical protein, conserved	ZUnknown	543.6	0.2672	0.0268	0	0	0	0	-0.0275	0.999265	0	0	1
Tb927.3.4140	Tb927.3.4140	Tb927.03.4140	hypothetical protein, conserved	ZUnknown	2031.5	0.0276	0.793	0	0	0	0	0.0025	0.999265	0	0	1
Tb927.3.4150	Tb927.3.4150	Tb927.03.4150	hypothetical protein, conserved	ZUnknown	1110	0.5059	1.72e-07	0	0	0	0	0.3499	0.180583	0	0	1
Tb927.3.4160	Tb927.3.4160	Tb927.03.4160	XPC-binding domain/UBA/TS-N domain containing protein, putative	ZUnknown	1357.9	-0.2426	0.00894	0	0	0	0	-0.1256	0.999265	0	0	1
Tb927.3.4170	Tb927.3.4170	Tb927.03.4170	CRK9AP	RNA.processing	366	0.1991	0.178	0	0	0	0	0.0348	0.999265	0	0	1
Tb927.3.4180	Tb927.3.4180	Tb927.03.4180	hypothetical protein	ZUnknown	722	-0.016	0.921	0	0	0	0	0.26	0.999265	0	0	1
Tb927.3.4190	Tb927.3.4190	Tb927.03.4190	endosomal integral membrane protein, putative	Vesicular.transport	4018.6	-0.2472	0.000193	0	0	0	0	-0.1176	0.999265	0	0	1
Tb927.3.4200	Tb927.3.4200	Tb927.03.4200	Integral membrane protein S linking to the trans Golgi network, putative	ZUnknown	804.7	-0.0737	0.564	0	0	0	0	-0.2851	0.672305	0	0	1
Tb927.3.4210	Tb927.3.4210	Tb927.03.4210	hypothetical protein, conserved, dsRNA binding domain	Mito.pathway	4694	0.0706	0.393	0	0	0	0	-0.121	0.999265	0	0	1
Tb927.3.4220	Tb927.3.4220	Tb927.03.4220	Zn-finger domain protein, putative	Zinc.finger	2821.4	0.1499	0.0442	0	0	0	0	0.0072	0.999265	0	0	1
Tb927.3.4230	Tb927.3.4230	Tb927.03.4230	CMF33 subtilisin-like serine peptidase	Cytoskeleton	10344	0.2919	1.94e-06	0	0	0	0	0.3662	0.626624	0	0	1
Tb927.3.4240	Tb927.3.4240	Tb927.03.4240	tryparedoxin 2, TRX2	Redox	490.5	0.1851	0.129	0	0	0	0	-0.1403	0.999265	0	0	1
Tb927.3.4250	Tb927.3.4250	Tb927.03.4250	hypothetical protein, conserved	ZUnknown	1399.6	0.4104	6.57e-08	0	0	0	0	0.0087	0.999265	0	0	1
Tb927.3.4260	Tb927.3.4260	Tb927.03.4260	Acyl-coenzyme A thioesterase, putative	Mito.pathway	1728.1	0.22	0.00394	0	0	0	0	-0.0122	0.999265	0	0	1
Tb927.3.4270	Tb927.3.4270	Tb927.03.4270	hypothetical protein, conserved	ZUnknown	8251.1	-0.3657	1.91e-05	0	0	0	0	0.0707	0.999265	0	0	1
Tb927.3.4280	Tb927.3.4280	Tb927.03.4280	mismatch repair protein MSH5	DNA	2218.3	0.3441	1.13e-06	0	0	0	0	0.0815	0.999265	0	0	1
Tb927.3.4290	Tb927.3.4290	Tb927.03.4290	paraflagellar rod component PFR1	Cytoskeleton	8418.3	-0.1054	0.237	0	0	0	0	0.1596	0.994787	0	0	1
Tb927.3.4300	Tb927.3.4300	Tb927.03.4300	73 kDa paraflagellar rod protein. PFR1	Cytoskeleton	8448.3	-0.122	0.182	0	0	0	0	0.1015	0.999265	0	0	0
Tb927.3.4310	Tb927.3.4310	Tb927.03.4310	73 kDa paraflagellar rod protein. PFR1	Cytoskeleton	8384	-0.1485	0.0943	0	0	0	0	0.1015	0.999265	0	0	0
Tb927.3.4320	Tb927.3.4320	Tb927.03.4320	73 kDa paraflagellar rod protein. PFR1	Cytoskeleton	8462.7	-0.1416	0.0851	0	0	0	0	0.1015	0.999265	0	0	0
Tb927.3.4330	Tb927.3.4330	Tb927.03.4330	73 kDa paraflagellar rod protein. PFR1	Cytoskeleton	7773.2	-0.1552	0.102	0	0	0	0	-0.0281	0.999901	0	0	0
Tb927.3.4340	Tb927.3.4340	Tb927.03.4340	diphthamide synthesis protein, putative	Enzyme	1058.2	0.2136	0.0173	0	0	0	0	-0.0402	0.999265	0	0	1
Tb927.3.4350	Tb927.3.4350	Tb927.03.4350	twin BRCT domain containing protein, putative	ZUnknown	1727.8	0.2628	0.000631	0	0	0	0	-0.0297	0.999265	0	0	1
Tb927.3.4360	Tb927.3.4360	Tb927.03.4360	40S ribosomal protein S15A	Ribosome	4956.9	-0.0197	0.851	0	0	0	0	-0.3244	0.704056	0	0	1
Tb927.3.4370	Tb927.3.4370	Tb927.03.4370	Vesicle coat protein involved in Golgi to plasma membrane transport, putative	ZUnknown	701.2	0.1397	0.228	0	0	0	0	0.0234	0.999265	0	0	1
Tb927.3.4380	Tb927.3.4380	Tb927.03.4380	Tob55, SAM50	Mito.biogenesis	848.9	0.1326	0.206	0	0	0	0	-0.1203	0.969066	0	0	1
Tb927.3.4390	Tb927.3.4390	Tb927.03.4390	dihydrolipoamide dehydrogenase, putative (GCVL-1)	Enzyme	1102.5	0.354	4.17e-05	0	0	0	0	-0.1489	0.969066	0	0	1
Tb927.3.4400	Tb927.3.4400	Tb927.03.4400	BBP41	Cytoskeleton	490.8	0.1933	0.105	0	0	0	0	0.316	0.437733	0	0	1
Tb927.3.4410	Tb927.3.4410	Tb927.03.4410	pre-RNA processing PIH1/Nop17, putative	ZUnknown	578.4	0.0449	0.751	0	0	0	0	-0.0645	0.999265	0	0	1
Tb927.3.4420	Tb927.3.4420	Tb927.03.4420	hypothetical protein, conserved, alpha/beta hydrolase domain	Enzyme	1396.9	-0.0244	0.823	0	0	0	0	0.0481	0.999265	0	0	1
Tb927.3.4430	Tb927.3.4430	Tb927.03.4430	hypothetical protein, conserved	ZUnknown	1595.9	0.1106	0.259	0	0	0	0	-0.0165	0.999265	0	0	1
Tb927.3.4440	Tb927.3.4440	Tb927.03.4440	hypothetical protein, conserved	ZUnknown	1312.3	-0.013	0.909	0	0	0	0	-0.2248	0.945318	0	0	1
Tb927.3.4450	Tb927.3.4450	Tb927.03.4450	hypothetical protein, conserved	ZUnknown	614.2	-0.4444	8.8e-06	0	0	0	0	-0.308	0.958663	0	0	1
Tb927.3.4460	Tb927.3.4460	Tb927.03.4460	hypothetical protein, conserved	ZUnknown	901.8	0.3899	3.52e-05	0	0	0	0	0.0727	0.999265	0	0	1
Tb927.3.4470	Tb927.3.4470	Tb927.03.4470	hypothetical protein, conserved	ZUnknown	1165.7	-0.0185	0.876	0	0	0	0	-0.0317	0.999265	0	0	1
Tb927.3.4480	Tb927.3.4480	Tb927.03.4480	hypothetical protein, conserved	ZUnknown	391.6	0.0712	0.638	0	0	0	0	0.0374	0.999265	0	0	1
Tb927.3.4490	Tb927.3.4490	Tb927.03.4490	protein farnesyltransferase alpha subunit, putative	Prenylation	1636.4	0.0416	0.693	0	0	0	0	0.0837	0.999265	0	0	1
Tb927.3.4500	Tb927.3.4500	Tb927.03.4500	fumarate hydratase, class I (FHc)	Glucose.glycerol	696.6	0.0058	0.967	0	0	0	0	-0.3252	0.989045	0	0	1
Tb927.3.4510	Tb927.3.4510	Tb927.03.4510	hypothetical protein, conserved	Cytoskeleton	4636.3	-0.0298	0.785	0	0	0	0	-0.0755	0.999265	0	0	1
Tb927.3.4520	Tb927.3.4520	Tb927.03.4520	hypothetical protein, conserved	ZUnknown	780.9	-0.0097	0.942	0	0	0	0	-0.4593	0.281692	0	0	1
Tb927.3.4530	Tb927.3.4530	Tb927.03.4530	hypothetical protein, conserved	ZUnknown	620.9	0.0766	0.548	0	0	0	0	-0.0912	0.999265	0	0	1
Tb927.3.4540	Tb927.3.4540	Tb927.03.4540	NOL1/NOP2/sun family, putative	ZUnknown	1135.3	0.0805	0.452	0	0	0	0	0.0395	0.999265	0	0	1
Tb927.3.4550	Tb927.3.4550	Tb927.03.4550	KRIPP6/TbPPR6 Kinetoplast ribosomal PPR-repeat containing protein	Mito.translation	1442.8	0.1259	0.168	0	0	0	0	-0.1381	0.812811	0	0	1
Tb927.3.4560	Tb927.3.4560	Tb927.03.4560	AMPKalpha2	Protein.kinase	2764	0.2508	0.000234	0	0	0	0	1.1146	0.0440692	1	0	1
Tb927.3.4570	Tb927.3.4570	Tb927.03.4570	UDP-GlcNAc:PI a1-6 GlcNAc-transferase, putative	Glycans	1912.1	0.0545	0.599	0	0	0	0	0.0805	0.999265	0	0	1
Tb927.3.4580	Tb927.3.4580	Tb927.03.4580	hypothetical protein, conserved	ZUnknown	2070	0.031	0.776	0	0	0	0	0.0729	0.999265	0	0	1
Tb927.3.4590	Tb927.3.4590	Tb927.03.4590	hypothetical protein, conserved	ZUnknown	1421.6	-0.5534	1.7e-10	0	0	0	0	0.5633	0.622968	0	0	1
[truncated: 9,341 more rows]

## Sheet: 2. DeSeq2 CDS with UTR
GeneID	Annotation2	Category	log2FoldChange CDS	padj CDS	log2FoldChange UTR	padj UTR	FoldChange CDS/UTR	3UTR length from CDS	Unique rip	UTR decrease 1.5x	CDS decrease 1.5x	UTR>1.5x less than CDS	GeneID for UTR
Tb927.9.17170	VSG pseudogene, degenerate and frameshifted	VSG	1.9297	NA	-2.3734	NA	19.74	0	0	0	0	1	utr_Tb927.9.17170
Tb927.9.17810	VSG pseudogene, degenerate and frameshifted	VSG	1.7078	NA	-2.332	NA	16.45	0	0	0	0	1	utr_Tb927.9.17810
Tb927.2.1160	retrotransposon hot spot protein (RHS2, pseudogene), putative	RHS	-0.3223	0.0245	-4.1176	0.0176	13.88	0	0	1	0	1	utr_Tb927.2.1160
Tb927.2.6372	VSG pseudogene, frameshifted and degenerate	VSG	0.9916	NA	-2.0687	0.0188	8.34	0	0	1	0	1	utr_Tb927.2.6372
Tb927.10.20	ESAG1, putative	ESAG	-0.7497	0.514	-3.7701	0.037	8.11	0	0	1	0	1	utr_Tb927.10.20
Tb927.8.4300	hypothetical protein	ZUnknown	1.8732	5.96e-75	-0.6212	2.61e-05	5.63	906	1.28	1	0	1	utr_Tb927.8.4300
Tb927.9.15540	BARP protein	Membrane.protein	0.588	0.000189	-1.8186	0.057	5.3	0	0	0	0	1	utr_Tb927.9.15540
Tb11.v5.0510	Gp63-3 surface protease homolog, putative	Membrane.protein	2.0072	2.35e-27	-0.3349	0.000154	5.07	7302	0	0	0	1	utr_Tb11.v5.0510.1_1
Tb09.v4.0125	VSG pseudogene	VSG	0.649	NA	-1.6798	1.93e-28	5.02	0	0	1	0	1	utr_Tb09.v4.0125
Tb927.11.9920	polyubiquitin, putative	Ubiquitin.proteasome	0.4183	9.75e-12	-1.6693	3.76e-33	4.25	950	0	1	0	1	utr_Tb927.11.9920
Tb11.v5.0470	receptor-type adenylate cyclase GRESAG 4, putative	ESAG	1.3807	9.39e-67	-0.6971	3.37e-36	4.22	2798	0	1	0	1	utr_Tb11.v5.0470.1_1
Tb927.8.4700	AAT5 Arginine transporter	Amino.acid.transport	0.9224	7.88e-17	-1.1489	1.24e-30	4.2	1730	0	1	0	1	utr_Tb927.8.4700
Tb927.8.5930	hypothetical protein	ZUnknown	2.0276	2.66e-08	0.0429	0.771	3.96	2600	0	0	0	1	utr_Tb927.8.5930
Tb927.11.18620	variant surface glycoprotein (VSG), putative	VSG	-0.3706	0.565	-2.3496	NA	3.94	0	0	0	0	1	utr_Tb927.11.18620.1_1
Tb09.v4.0069	VSG pseudogene	VSG	0.8173	NA	-1.1512	NA	3.91	0	0	0	0	1	utr_Tb09.v4.0069
Tb927.2.6310	iron/ascorbate oxidoreductase family protein, putative	Mito.pathway	-1.1165	0.578	-2.9918	8.02e-17	3.67	0	0	1	0	1	utr_Tb927.2.6310
Tb927.2.6280	adenosine transporter 2, putative (TbNT7)	Nucleotides	-1.5008	4.21e-13	-3.3052	2.33e-18	3.49	0	0	1	1	1	utr_Tb927.2.6280
Tb927.11.7630	Gp63-1 surface protease homolog, putative	Membrane.protein	2.4499	1.16e-88	0.6653	0.00255	3.45	681	0	0	0	1	utr_Tb927.11.7630.1_1
Tb927.1.330	retrotransposon hot spot protein (RHS, pseudogene), putative	RHS	0.1977	0.285	-1.5905	NA	3.45	0	0	0	0	1	utr_Tb927.1.330
Tb927.9.16460	variant surface glycoprotein (VSG, atypical), putative	VSG	-1.3063	NA	-3.0574	NA	3.37	0	0	0	0	1	utr_Tb927.9.16460
Tb927.11.7214	hypothetical protein, conserved, SAm-dependent methyltransferase domain	ZUnknown	0.0795	0.547	-1.6568	0.0151	3.33	0	0	1	0	1	utr_Tb927.11.7214
Tb927.4.1210	hypothetical protein	ZUnknown	1.5197	0.501	-0.1978	0.686	3.29	0	0	0	0	1	utr_Tb927.4.1210
Tb927.11.490	hypothetical protein, conserved	ZUnknown	1.9022	4.31e-83	0.2041	0.145	3.24	566	2.68	0	0	1	utr_Tb927.11.490
Tb927.3.5310	paraflagellar rod protein,I2 antigen	Cytoskeleton	-0.1658	0.00827	-1.8417	6.58e-39	3.2	403	0	1	0	1	utr_Tb927.3.5310
Tb11.v5.1061	hypothetical protein, conserved	ZUnknown	-0.0787	0.653	-1.7365	0.0744	3.16	137	0	0	0	1	utr_Tb11.v5.1061.1_1
Tb927.5.1660	protein phosphatase 2C, putative	Protein.phosphatase	0.041	0.742	-1.6064	4.4e-77	3.13	1176	0.98	1	0	1	utr_Tb927.5.1660
Tb11.v5.0781	MIZ/SP-RING zinc finger, putative	ZUnknown	0.1463	0.331	-1.4617	4.01e-16	3.05	997	0	1	0	1	utr_Tb11.v5.0781.1_2
Tb10.v4.0205	VSG pseudogene fragment	VSG	-0.1888	0.742	-1.7734	0.00031	3	0	0	1	0	1	utr_Tb10.v4.0205
Tb927.7.6710	hypothetical protein	ZUnknown	0.2089	0.167	-1.3402	4.34e-10	2.93	400	0	1	0	1	utr_Tb927.7.6710
Tb11.v5.0509	hypothetical protein, conserved	ZUnknown	0.6788	1.86e-09	-0.7871	2.53e-09	2.76	3263	0	1	0	1	utr_Tb11.v5.0509.1_2
Tb11.1470	VSG pseudogene	VSG	-1.3564	NA	-2.7961	NA	2.71	0	0	0	0	1	utr_Tb11.1470
Tb927.9.15610	BARP protein	Membrane.protein	1.7015	1.33e-38	0.366	0.377	2.52	483	0	0	0	1	utr_Tb927.9.15610
Tb927.9.15530	BARP protein	Membrane.protein	0.6772	1.68e-10	-0.6458	0.00703	2.5	486	0	1	0	1	utr_Tb927.9.15530
Tb927.7.6500	variant surface glycoprotein (VSG), putative	VSG	1.2675	0.000461	-0.0459	0.959	2.49	0	0	0	0	1	utr_Tb927.7.6500
Tb927.1.3450	hypothetical protein, conserved	ZUnknown	-0.6691	5.15e-19	-1.9777	1.78e-60	2.48	1311	0	1	1	1	utr_Tb927.1.3450
Tb927.4.4810	hypothetical protein, conserved	Vesicular.transport	1.0069	2.84e-21	-0.2896	0.066	2.46	763	1.18	0	0	1	utr_Tb927.4.4810
Tb11.v5.0329	variant surface protein, putative	VSG	1.0155	NA	-0.2457	NA	2.4	0	0	0	0	1	utr_Tb11.v5.0329.1_1
Tb927.8.4940	hypothetical protein, conserved	ZUnknown	0.1136	0.212	-1.1291	0.000203	2.37	35	0	1	0	1	utr_Tb927.8.4940
Tb927.7.2980	Nitroreductase family, putative	ZUnknown	1.7622	2.21e-126	0.5373	6.09e-07	2.34	653	1.15	0	0	1	utr_Tb927.7.2980
Tb927.7.3020	Nitroreductase family, putative	ZUnknown	1.7321	1.65e-125	0.503	8.02e-06	2.34	650	0	0	0	1	utr_Tb927.7.3020
Tb927.4.4640	hypothetical protein, conserved	ZUnknown	0.4419	0.00618	-0.7766	0.398	2.33	0	0	0	0	1	utr_Tb927.4.4640
Tb927.9.13200	hypothetical protein	ZUnknown	0.6779	1.13e-06	-0.5061	0.0011	2.27	351	0	0	0	1	utr_Tb927.9.13200
Tb927.8.1580	hypothetical protein, conserved	ZUnknown	1.1718	1.19e-33	-0.0048	0.973	2.26	1004	2	0	0	1	utr_Tb927.8.1580
Tb927.7.7090	hypothetical protein, conserved, no clear yeast or human matches	ZUnknown	0.9255	9.58e-25	-0.2379	0.11	2.24	546	0	0	0	1	utr_Tb927.7.7090
Tb927.10.10210	procyclin-associated gene 4 (PAG4) protein (PAG4)	PAG	1.3888	5.65e-15	0.2288	0.107	2.23	1119	0	0	0	1	utr_Tb927.10.10210
Tb05.30F7.410	hypothetical protein	ZUnknown	0.9884	0.305	-0.151	0.385	2.2	3594	0	0	0	1	utr_Tb05.30F7.410
Tb927.4.2500	eIF2K2 eukaryotic translation initiation factor 2-alpha kinase	Protein.kinase	0.6291	7.57e-26	-0.4976	1.95e-07	2.18	1960	1.11	0	0	1	utr_Tb927.4.2500
Tb11.v5.0926	variant surface glycoprotein (VSG, atypical), putative	VSG	-0.4255	NA	-1.5378	0.0329	2.16	0	0	1	0	1	utr_Tb11.v5.0926.1_1
Tb927.2.5080	hypothetical protein, conserved	ZUnknown	0.3952	3.73e-05	-0.7117	0.317	2.15	0	0	0	0	1	utr_Tb927.2.5080
Tb927.7.1850	hypothetical protein, conserved	ZUnknown	1.9773	1.1e-137	0.8875	1.03e-13	2.13	562	#N/A	0	0	1	utr_Tb927.7.1850
Tb927.1.2160	calpain-like protein fragment, putative	Protease	0.4981	0.000211	-0.5815	0.112	2.11	1183	0	0	0	1	utr_Tb927.1.2160
Tb927.11.17680	VSG pseudogene, point mutation	VSG	0.649	NA	-0.4301	NA	2.11	0	0	0	0	1	utr_Tb927.11.17680
Tb927.9.6620	hypothetical protein, conserved	Mito.pathway	0.8474	2.06e-12	-0.2032	0.268	2.07	552	0	0	0	1	utr_Tb927.9.6620
Tb11.15.0005b	hypothetical protein, conserved, degenerate	ZUnknown	-0.7807	NA	-1.8317	NA	2.07	0	0	0	0	1	utr_Tb11.15.0005b.1_1
Tb927.11.10470	hypothetical protein, conserved	ZUnknown	0.7731	5.4e-28	-0.2715	0.0167	2.06	1595	0.9	0	0	1	utr_Tb927.11.10470
Tb11.v5.0380	variant surface glycoprotein (VSG, atypical), putative	VSG	0.1158	0.555	-0.9254	NA	2.06	0	0	0	0	1	utr_Tb11.v5.0380.1_2
Tb927.9.16070	hypothetical protein	ZUnknown	-2.1828	0.0854	-3.2149	0.121	2.04	0	0	0	0	1	utr_Tb927.9.16070
Tb927.11.15030	small GTPase (X3)	Vesicular.transport	0.4854	2.49e-09	-0.5344	4.22e-10	2.03	1377	0	0	0	1	utr_Tb927.11.15030
Tb927.6.820	PUF4	RNA.binding	0.5998	1.13e-18	-0.4154	0.000423	2.02	3033	0	0	0	1	utr_Tb927.6.820
Tb11.v5.1037	variant surface glycoprotein (VSG), putative	VSG	0.649	NA	-0.3551	0.0321	2.01	0	0	0	0	1	utr_Tb11.v5.1037.1_1
Tb927.8.910	hypothetical protein, conserved, Qn domains, PRK14951 domain (DNA polymerase III subunits gamma and tau, E= -3), kinetoplastid specific	ZUnknown	-0.5335	6.3e-13	-1.5371	1.15e-10	2	11413	1.61	1	0	1	utr_Tb927.8.910
Tb927.11.12330	hypothetical protein, conserved	ZUnknown	0.4087	0.0122	-0.5807	0.349	1.99	0	0	0	0	1	utr_Tb927.11.12330
Tb927.7.1810	hypothetical protein, conserved	ZUnknown	1.9117	3.14e-97	0.9397	4.95e-14	1.96	562	2.06	0	0	1	utr_Tb927.7.1810
Tb927.2.6180	iron/ascorbate oxidoreductase family protein, putative	Mito.pathway	-0.8282	4.14e-11	-1.788	3.31e-48	1.95	2228	0	1	1	1	utr_Tb927.2.6180
Tb927.9.17640	hypothetical protein, conserved	ZUnknown	0.3697	0.222	-0.5913	0.449	1.95	0	0	0	0	1	utr_Tb927.9.17640
Tb927.11.5450	malic enzyme	Mito.pathway	0.624	2.49e-23	-0.3326	1.88e-05	1.94	1094	0	0	0	1	utr_Tb927.11.5450
Tb927.2.6210	iron/ascorbate oxidoreductase family protein, putative	Mito.pathway	-0.7329	3.32e-06	-1.6769	1.43e-15	1.92	2224	0	1	1	1	utr_Tb927.2.6210
Tb927.10.13200	PPR4	Mito.translation	0.1803	0.0264	-0.7574	0.102	1.92	23	0	0	0	1	utr_Tb927.10.13200
Tb11.v5.0221	transporter, putative	Transporter	1.2305	5.56e-32	0.2866	0.0504	1.92	3513	0	0	0	1	utr_Tb11.v5.0221.1_2
Tb11.v5.0681	hypothetical protein, conserved	ZUnknown	-0.2086	0.038	-1.1477	8.92e-71	1.92	4466	0	1	0	1	utr_Tb11.v5.0681.1_1
Tb927.9.16750	VSG pseudogene, frameshifted and degenerate	VSG	0.649	NA	-0.2808	0.137	1.91	0	0	0	0	1	utr_Tb927.9.16750
Tb927.9.15570	BARP protein	Membrane.protein	0.636	0.000562	-0.2914	0.711	1.9	0	0	0	0	1	utr_Tb927.9.15570
Tb927.7.6000	protein associated with differentiation 8, PAD8	Transporter	-0.874	8.11e-27	-1.8	7.61e-05	1.9	0	0	1	1	1	utr_Tb927.7.6000
Tb927.10.5390	hypothetical protein, conserved	ZUnknown	0.4067	9.25e-10	-0.5209	4.36e-05	1.9	391	0	0	0	1	utr_Tb927.10.5390
Tb11.v5.0695	variant surface glycoprotein (VSG), putative	VSG	0.8173	NA	-0.1038	0.269	1.89	0	0	0	0	1	utr_Tb11.v5.0695.1_1
Tb927.10.13780	GSK3-short glycogen synthase kinase 3	Glycans	0.664	2.45e-22	-0.2407	0.00734	1.87	2872	0	0	0	1	utr_Tb927.10.13780
Tb927.10.6210	TPR repeat, putative	ZUnknown	0.5126	2.65e-14	-0.3844	0.000153	1.86	848	0	0	0	1	utr_Tb927.10.6210
Tb11.v5.1047	variant surface glycoprotein (VSG, atypical), putative	VSG	0.8173	NA	-0.0696	0.884	1.85	0	0	0	0	1	utr_Tb11.v5.1047.1_1
Tb927.2.5800	sedoheptulose-1,7-bisphosphatase (SBPase)	Glucose.glycerol	-0.1786	0.0344	-1.0448	1.77e-14	1.82	410	0	1	0	1	utr_Tb927.2.5800
Tb927.9.4310	tricarboxylate carrier, putative	Mito.membrane	1.3688	4.07e-75	0.5207	2.17e-06	1.8	2788	0	0	0	1	utr_Tb927.9.4310
Tb927.11.11150	U5 snRNP-specific 40 kDa protein U5-40K	RNA.processing	-0.371	0.000268	-1.2197	0.334	1.8	0	0	0	0	1	utr_Tb927.11.11150
Tb11.v5.0249	protein kinase, putative	Protein.kinase	0.4327	7.17e-05	-0.3966	0.0307	1.78	566	0	0	0	1	utr_Tb11.v5.0249.1_1
Tb927.9.8370	hypothetical protein, conserved	ZUnknown	0.4185	1.99e-06	-0.4148	1.96e-05	1.78	774	0	0	0	1	utr_Tb927.9.8370
Tb927.9.11820	CRAL/TRIO domain containing protein, putative	ZUnknown	1.0237	1.24e-20	0.1971	0.274	1.77	662	2.59	0	0	1	utr_Tb927.9.11820
Tb927.3.1070	RF1 Mitochondrial peptide chain release factor 1	Mito.translation	0.3506	7.47e-06	-0.4694	0.167	1.77	3	0	0	0	1	utr_Tb927.3.1070
Tb11.v5.0436	Leucine Rich Repeat, putative	ZUnknown	0.2722	0.00801	-0.5515	3.77e-07	1.77	6474	0	0	0	1	utr_Tb11.v5.0436.1_1
Tb11.v5.0537	polyubiquitin, putative	Ubiquitin.proteasome	0.3552	3.35e-06	-0.4525	1.84e-10	1.75	6245	0	0	0	1	utr_Tb11.v5.0537.1_2
Tb927.8.4510	nucleoside diphosphate kinase, putative	ZUnknown	0.3179	1.73e-05	-0.4782	3.18e-05	1.74	805	0	0	0	1	utr_Tb927.8.4510
Tb927.10.12750	hypothetical protein	ZUnknown	0.4783	0.0227	-0.3181	0.101	1.74	766	0	0	0	1	utr_Tb927.10.12750
Tb927.2.4700	SDH8 succinate dehydrogenase (complex II) subunit	Mito.e.transport	0.5413	1.17e-07	-0.2527	0.0398	1.73	1866	0	0	0	1	utr_Tb927.2.4700
Tb927.10.100	ESAG2 pseudogene	ESAG.pseudo	0.3682	0.00791	-0.411	0.612	1.72	0	0	0	0	1	utr_Tb927.10.100
Tb11.v5.0730	PUF4 pumillio RNA binding protein 4, putative	RNA.binding	0.6427	2.51e-09	-0.1338	0.504	1.71	713	0	0	0	1	utr_Tb11.v5.0730.1_1
Tb927.10.16010	hypothetical protein	ZUnknown	0.3289	0.484	-0.4424	0.0185	1.71	1036	0	0	0	1	utr_Tb927.10.16010
Tb927.2.1730	hypothetical protein, conserved	ZUnknown	0.0656	0.661	-0.7089	0.437	1.71	0	0	0	0	1	utr_Tb927.2.1730
Tb927.5.3440	hypothetical protein, conserved	ZUnknown	1.9464	4.38e-92	1.1808	2.18e-20	1.7	525	0	0	0	1	utr_Tb927.5.3440
Tb927.11.8450	Amastin surface glycoprotein, putative	Membrane.protein	0.4282	8.87e-06	-0.3217	0.0165	1.68	1247	0	0	0	1	utr_Tb927.11.8450
Tb927.9.12690	prenyl protein specific carboxyl methyltransferase	Prenylation	0.3677	0.00197	-0.379	0.00766	1.68	826	0	0	0	1	utr_Tb927.9.12690
Tb927.2.3720	ubiquitin-conjugating enzyme, putative	Ubiquitin.proteasome	0.7604	6.09e-16	0.0146	0.933	1.68	2685	0	0	0	1	utr_Tb927.2.3720
Tb927.9.9370	PSP1 C-terminal conserved region, putative	ZUnknown	0.9356	1.19e-23	0.1843	0.133	1.68	3859	0	0	0	1	utr_Tb927.9.9370
Tb927.11.2400	Flabarin-like	Cytoskeleton	0.5108	1.35e-12	-0.2332	0.00361	1.67	11186	0	0	0	1	utr_Tb927.11.2400
Tb11.v5.0576	receptor-type adenylate cyclase GRESAG 4, putative	ESAG	0.5109	0.000809	-0.2321	0.0557	1.67	2699	0	0	0	1	utr_Tb11.v5.0576.1_1
Tb927.10.8890	kinetoplast DNA-associated protein, putative	Mito.DNA	0.6083	2.46e-13	-0.1334	0.235	1.67	2283	0	0	0	1	utr_Tb927.10.8890
Tb927.8.630	lipoate-protein ligase, lipoyltransferase, lipoate biosynthesis protein, putative	Mito.pathway	-0.1774	0.168	-0.9196	0.139	1.67	0	0	0	0	1	utr_Tb927.8.630
Tb927.2.6220	adenosine transporter 2, putative (TbNT4)	Nucleotides	-2.5635	4.44e-107	-3.2994	2.53e-08	1.67	0	0	1	1	1	utr_Tb927.2.6220
Tb927.11.12710	variant surface glycoprotein (VSG)-related, putative	VSG	1.1021	7.66e-12	0.364	0.0313	1.67	1429	0	0	0	1	utr_Tb927.11.12710
Tb927.6.3730	chaperone DNAj, putative, J38	Chaperone	-0.352	0.00139	-1.0863	0.0259	1.66	50	0	1	0	1	utr_Tb927.6.3730
Tb11.v5.0627	lipase domain protein, putative	Enzyme	0.2947	0.00763	-0.4332	5.66e-08	1.66	12083	0	0	0	1	utr_Tb11.v5.0627.1_1
Tb927.11.4430	ferric reductase, putative,ferric reductase transmembrane component, putative	Enzyme	-0.5016	3.22e-11	-1.2321	1.54e-54	1.66	1496	0	1	0	1	utr_Tb927.11.4430
Tb927.9.15600	BARP protein	Membrane.protein	0.7218	5.06e-08	-0.0077	0.991	1.66	483	0	0	0	1	utr_Tb927.9.15600
Tb11.v5.0569	amino acid transporter, putative	Transporter	1.1291	2.4e-34	0.3974	3.6e-07	1.66	4149	0	0	0	1	utr_Tb11.v5.0569.1_2
Tb927.11.16830	IFT22 (was RABL5) (in UPF1-TAP)	Cytoskeleton	0.428	1.34e-09	-0.2935	0.00026	1.65	2083	0	0	0	1	utr_Tb927.11.16830
Tb927.11.16480	enoyl-CoA hydratase/isomerase family protein, putative	Lipids	1.3464	5.19e-56	0.6281	4.94e-12	1.65	1401	0	0	0	1	utr_Tb927.11.16480
Tb927.11.13940	ubiquitin-conjugating enzyme e2, putative	Ubiquitin.proteasome	1.5649	1.9e-73	0.8424	1.39e-18	1.65	2810	0	0	0	1	utr_Tb927.11.13940
Tb927.2.220	retrotransposon hot spot protein (RHS2, pseudogene), putative	RHS	0.0817	0.608	-0.6261	0.604	1.63	0	0	0	0	1	utr_Tb927.2.220
Tb927.11.1150	radial spoke protein RSP3, putative	Cytoskeleton	0.2799	7.9e-05	-0.418	1.08e-06	1.62	1426	0	0	0	1	utr_Tb927.11.1150
Tb927.6.1920	hypothetical protein, conserved	ZUnknown	0.2303	0.00335	-0.465	9.32e-09	1.62	2076	0	0	0	1	utr_Tb927.6.1920
Tb927.8.6340	CYC10, CYC2-like cyclin	Cell.cycle	0.547	2.49e-10	-0.14	0.695	1.61	2948	0	0	0	1	utr_Tb927.8.6340
Tb927.9.2240	protein kinase, putative	Protein.kinase	0.2695	0.000187	-0.4162	7.85e-07	1.61	1998	0	0	0	1	utr_Tb927.9.2240
Tb927.6.150	retrotransposon hot spot protein (RHS3, pseudogene), putative	RHS	0.874	3.21e-23	0.1889	0.56	1.61	1499	0	0	0	1	utr_Tb927.6.150
Tb927.11.14090	DRBD18	RNA.binding	-2.4158	3.28e-279	-3.1072	8.88e-205	1.61	280	0	1	1	1	utr_Tb927.11.14090
Tb927.4.4940	hypothetical protein, conserved, poly(Q), no clear yeast or human matches	ZUnknown	1.6967	2.33e-69	1.0226	4.23e-15	1.6	1948 (3000)	1.14	0	0	1	utr_Tb927.4.4940
Tb927.1.4100	cytochrome oxidase subunit IV (COXIV)	Mito.e.transport	1.2012	2.78e-69	0.5201	1.25e-06	1.6	1757	0	0	0	1	utr_Tb927.1.4100
Tb927.9.10560	POMP6/TbLOK1	Mito.membrane	0.177	0.0527	-0.5014	1.54e-07	1.6	1126	0	0	0	1	utr_Tb927.9.10560
Tb927.11.6120	ABC transporter, putative	Transporter	-0.3911	2.72e-10	-1.0697	5.04e-17	1.6	1758	0	1	0	1	utr_Tb927.11.6120
Tb927.8.7720	hypothetical protein, conserved	ZUnknown	0.2085	0.0288	-0.4665	7.06e-09	1.6	2764	0	0	0	1	utr_Tb927.8.7720
Tb927.9.15630	BARP protein	Membrane.protein	0.9445	1.49e-10	0.2749	0.139	1.59	482	0	0	0	1	utr_Tb927.9.15630
Tb927.1.430	retrotransposon hot spot protein (RHS, pseudogene), putative	RHS	-0.1319	0.125	-0.8002	0.0751	1.59	2	0	0	0	1	utr_Tb927.1.430
Tb927.2.1130	retrotransposon hot spot protein (RHS3, pseudogene), putative	RHS	0.5486	3.75e-06	-0.1206	0.53	1.59	3283	0	0	0	1	utr_Tb927.2.1130
Tb11.v5.0227	75 kDa invariant surface glycoprotein, putative	Membrane.protein	0.3274	0.0256	-0.3341	0.00183	1.58	3858	0	0	0	1	utr_Tb11.v5.0227.1_1
Tb927.2.6240	adenosine transporter 2 (TbNT5)	Nucleotides	-1.7085	9.64e-19	-2.3655	1.25e-10	1.58	0	0	1	1	1	utr_Tb927.2.6240
Tb927.10.14930	ZC3H39	RNA.binding	0.2759	0.00127	-0.3869	3.86e-05	1.58	3450	0	0	0	1	utr_Tb927.10.14930
Tb927.8.970	hypothetical protein	ZUnknown	1.2394	2.19e-45	0.5826	5.04e-08	1.58	982	0	0	0	1	utr_Tb927.8.970
Tb927.11.6700	hypothetical protein, conserved	ZUnknown	0.8891	1.18e-17	0.2278	0.0137	1.58	1314	0	0	0	1	utr_Tb927.11.6700
Tb927.4.4710	hypothetical protein, conserved	ZUnknown	-0.1823	0.0336	-0.8413	0.0647	1.58	50	0	0	0	1	utr_Tb927.4.4710
Tb927.10.15620	hypothetical protein	ZUnknown	0.8004	2.99e-08	0.1396	0.343	1.58	1304	0	0	0	1	utr_Tb927.10.15620
Tb927.4.3170	hypothetical protein, conserved	ZUnknown	0.6864	7.01e-24	0.026	0.865	1.58	669	0	0	0	1	utr_Tb927.4.3170
Tb10.v4.0042	hypothetical protein	ZUnknown	0.0418	0.939	-0.6176	0.631	1.58	0	0	0	0	1	utr_Tb10.v4.0042
Tb927.11.15010	NEK21 protein kinase	Protein.kinase	1.2328	2.37e-57	0.5828	3.19e-06	1.57	2213	0	0	0	1	utr_Tb927.11.15010
Tb927.11.8310	class I transcription factor A, subunit 4 (CITFA-4)	RNA.synthesis	0.2608	0.000232	-0.3903	2.21e-05	1.57	1419	0	0	0	1	utr_Tb927.11.8310
Tb927.4.1390	hypothetical protein, conserved	ZUnknown	1.1299	6.57e-75	0.4774	8.67e-06	1.57	1030	0	0	0	1	utr_Tb927.4.1390
Tb09.v4.0015	hypothetical protein	ZUnknown	-0.4058	0.000935	-1.0585	NA	1.57	0	0	0	0	1	utr_Tb09.v4.0015
Tb11.v5.0305	TFIID-like protein, putative	RNA.synthesis	0.3006	0.0862	-0.3399	0.000344	1.56	1860	0	0	0	1	utr_Tb11.v5.0305.1_2
Tb11.02.5070b	hypothetical protein, conserved	ZUnknown	0.6088	4.12e-08	-0.0328	0.928	1.56	208	0	0	0	1	utr_Tb11.02.5070b.1_1
Tb927.9.10950	chaperone DNAj, putative, J43	Chaperone	1.0116	7.27e-45	0.3808	0.000994	1.55	2655	0	0	0	1	utr_Tb927.9.10950
Tb927.11.16200	microtubule-associated protein,corset-associated protein 17 (CAP17)	Cytoskeleton	0.7754	6.64e-13	0.1463	0.401	1.55	757	0	0	0	1	utr_Tb927.11.16200
Tb927.4.3160	Dihydroxyacetonephosphate acyltransferase	Lipids	-0.9474	4.41e-46	-1.5835	4.31e-50	1.55	1057	0	1	1	1	utr_Tb927.4.3160
Tb927.8.8080	UDP-Gal or UDP-GlcNAc-dependent glycosyltransferase pseudogene	Pseudogene	-1.2796	1.61e-12	-1.911	2.65e-05	1.55	0	0	1	1	1	utr_Tb927.8.8080
Tb11.v5.0685	hypothetical protein, conserved	ZUnknown	0.2065	0.132	-0.425	0.000241	1.55	3910	0	0	0	1	utr_Tb11.v5.0685.1_2
Tb927.6.220	purine nucleoside transporter NT9	Nucleotides	1.2314	3.41e-28	0.6095	0.000468	1.54	1073	0	0	0	1	utr_Tb927.6.220
Tb11.v5.0555	hypothetical protein, conserved	ZUnknown	0.4567	4.72e-11	-0.1673	0.158	1.54	4364	0	0	0	1	utr_Tb11.v5.0555.1_2
Tb927.11.13120	PUB domain containing protein, putative	ZUnknown	0.2022	0.0482	-0.4177	0.503	1.54	0	0	0	0	1	utr_Tb927.11.13120
Tb11.v5.0618	hypothetical protein, conserved	ZUnknown	0.3482	0.000666	-0.2781	NA	1.54	0	0	0	0	1	utr_Tb11.v5.0618.1_1
Tb927.5.1700	Kinesin-2, also "replication Factor A 28 kDa subunit, or RPA1-2	DNA	0.3709	2.28e-06	-0.2456	0.0251	1.53	2225	0	0	0	1	utr_Tb927.5.1700
Tb927.10.5930	NEK17 protein kinase	Protein.kinase	0.1033	0.322	-0.513	0.000842	1.53	1225	0	0	0	1	utr_Tb927.10.5930
Tb927.11.5670	MND1 homologue, putative involvement in meiosis	DNA	1.6573	8.58e-59	1.0512	1.38e-14	1.52	842	0	0	0	1	utr_Tb927.11.5670
Tb927.9.7350	ESAG1 pseudogene	ESAG.pseudo	-1.1512	NA	-1.758	0.0966	1.52	0	0	0	0	1	utr_Tb927.9.7350
Tb927.5.650	GRESAG 4, putative receptor-type adenylate cyclase	GRESAG	0.747	2.98e-20	0.1459	0.275	1.52	1922	0	0	0	1	utr_Tb927.5.650
Tb927.2.1310	leucine-rich repeat protein LRRP, pseudogene	LRRP	-0.4022	7.44e-05	-1.0051	2.91e-17	1.52	4501	0	1	0	1	utr_Tb927.2.1310
Tb927.1.2260	calpain-like protein fragment, putative	Protease	0.2397	0.00467	-0.3616	0.00321	1.52	1740	0	0	0	1	utr_Tb927.1.2260
Tb11.v5.0686	hypothetical protein, conserved	ZUnknown	0.4125	1.4e-05	-0.1876	0.0353	1.52	5005	0	0	0	1	utr_Tb11.v5.0686.1_2
Tb927.8.3740	pterin 4 alpha carbinolamine dehydratase, putative	Enzyme	0.0316	0.796	-0.5646	0.000628	1.51	466	0	0	0	1	utr_Tb927.8.3740
Tb11.0370	MSP-A, putative	Membrane.protein	1.4768	4.96e-50	0.8838	5.82e-10	1.51	604	0	0	0	1	utr_Tb11.0370
Tb927.3.4900	tRNA isopentenyltransferase, putative	rRNA.tRNA.process	-0.0193	0.878	-0.6138	0.342	1.51	0	0	0	0	1	utr_Tb927.3.4900
Tb927.7.5940	Protein Associated with Differentiation (TbPAD2)	Signalling	0.584	1.29e-13	-0.0062	0.975	1.51	818	0	0	0	1	utr_Tb927.7.5940
Tb927.5.310	invariant surface glycoprotein, putative	ZUnknown	0.2343	0.00252	-0.3648	1.06e-05	1.51	2256	0	0	0	1	utr_Tb927.5.310
Tb927.10.2420	hypothetical protein	ZUnknown	0.8015	7.45e-06	0.211	0.0512	1.51	1441	0	0	0	1	utr_Tb927.10.2420
Tb927.6.5090	hypothetical protein, conserved	ZUnknown	0.6885	2.28e-19	0.0958	0.517	1.51	665	0	0	0	1	utr_Tb927.6.5090
Tb11.1480b	variant surface glycoprotein (VSG), frameshifted	VSG	#VALUE!	NA	2.1195	1.36e-13	#VALUE!	0	0	0	0	0	utr_Tb11.1480b.1_1
Tb11.v5.0745	hypothetical protein, conserved	ZUnknown	0.4932	1.79e-08	-0.7349	1.3e-26	2.34	5409	0	1	1	0	utr_Tb11.v5.0745.1_2
Tb927.11.2500	carboxypeptidase, putative,metallo-peptidase, Clan MA(E) Family M32	Protease	0.2009	0.00281	-0.9762	2.59e-14	2.26	554	1.07	1	1	0	utr_Tb927.11.2500
Tb927.9.4230	fatty acyl CoA synthetase 4 (ACS4)	Lipids	0.2353	0.000415	-0.9302	3.68e-28	2.24	855	#N/A	1	1	0	utr_Tb927.9.4230
Tb927.10.14390	POB3 component of FACT complex	Chromatin	0.4667	1.15e-13	-0.6685	2.17e-11	2.2	602	1.1	1	1	0	utr_Tb927.10.14390
Tb927.5.1130	hypothetical protein, conserved	Mito.pathway	0.506	3.02e-08	-0.6025	2.68e-09	2.16	2504	0	1	1	0	utr_Tb927.5.1130
Tb927.11.16780	hypothetical protein	ZUnknown	0.3635	0.00134	-0.7368	0.00168	2.14	1976	0.83	1	1	0	utr_Tb927.11.16780
Tb927.10.3230	protein kinase, putative	Protein.kinase	0.1742	0.0335	-0.8731	4.78e-12	2.07	595	1.25	1	1	0	utr_Tb927.10.3230
Tb927.10.1500	methionyl-tRNA synthetase, putative (MetRS)	Translation.tRNA	0.2291	0.000219	-0.8031	1.46e-25	2.05	690	0.41	1	1	0	utr_Tb927.10.1500
Tb927.9.2560	TLC domain containing protein, putative	ZUnknown	0.2706	0.00166	-0.7568	6.13e-14	2.04	1619	1.25	1	1	0	utr_Tb927.9.2560
Tb927.11.13420	PPPDE putative peptidase domain containing protein, putative	ZUnknown	0.183	0.0581	-0.8283	1.61e-10	2.02	546	1.52	1	1	0	utr_Tb927.11.13420
Tb927.8.870	serine/threonine kinase, putative,protein kinase, putative	Protein.kinase	0.2777	0.000175	-0.716	0.00137	1.99	5585	0	1	1	0	utr_Tb927.8.870
Tb11.v5.0852	hypothetical protein, conserved	ZUnknown	0.3185	0.00541	-0.6482	7.75e-10	1.95	4329	0	1	1	0	utr_Tb11.v5.0852.1_1
Tb927.7.480	hypothetical protein, conserved	ZUnknown	0.1985	0.00247	-0.7469	1.35e-11	1.93	1110	0	1	1	0	utr_Tb927.7.480
Tb927.6.1510	lysyl-tRNA synthetase, putative	Translation.tRNA	0.0778	0.435	-0.8588	8.4e-10	1.91	627	0	1	1	0	utr_Tb927.6.1510
Tb927.7.1530	2OG-Fe(II) oxygenase superfamily, putative	ZUnknown	0.1824	0.0525	-0.7531	0.000437	1.91	215	0	1	1	0	utr_Tb927.7.1530
Tb927.8.5240	Domain of unknown function DUF221, putative	ZUnknown	-0.0867	0.238	-0.9944	7.5e-27	1.88	813	0.82	1	1	0	utr_Tb927.8.5240
Tb927.9.15660	ACP6	ESAG	0.3106	0.00823	-0.6035	9.03e-06	1.88	4006	0	1	1	0	utr_Tb927.9.15660
Tb927.10.14780	protein kinase, putative,mitogen-activated protein kinase kinase kinase, putative	Protein.kinase	0.178	0.00923	-0.6481	9.46e-21	1.77	1380	0	1	1	0	utr_Tb927.10.14780
Tb927.3.4930	hypothetical protein, conserved	ZUnknown	-0.1507	0.298	-0.9415	2.99e-05	1.73	63	0	1	1	0	utr_Tb927.3.4930
Tb927.11.16820	hypothetical protein, conserved	ZUnknown	0.1282	0.198	-0.6365	6.9e-07	1.7	4111	0	1	1	0	utr_Tb927.11.16820
Tb927.10.12340	hypothetical protein, conserved	ZUnknown	-0.0518	0.725	-0.8136	0.0382	1.7	126	0	1	1	0	utr_Tb927.10.12340
Tb927.2.4920	hypothetical protein, conserved, signal pep, lectin-like domain	ZUnknown	-0.2052	0.118	-0.9627	1.33e-14	1.69	694	0	1	1	0	utr_Tb927.2.4920
Tb927.10.14030	hypothetical protein, conserved, in Golgi and ER	ZUnknown	0.139	0.0581	-0.6204	0.00487	1.69	50	0	1	1	0	utr_Tb927.10.14030
Tb927.8.3550	MAPK3 protein kinase	Protein.kinase	0.1232	0.0913	-0.6231	3.76e-09	1.68	1992	0	1	1	0	utr_Tb927.8.3550
Tb927.10.12350	hypothetical protein, conserved	ZUnknown	0.0467	0.711	-0.6999	0.00806	1.68	166	0	1	1	0	utr_Tb927.10.12350
Tb927.8.3380	SDH2N succinate dehydrogenase (complex II) subunit, electron transfer protein	Mito.e.transport	0.0893	0.376	-0.6537	3.55e-11	1.67	1063	0	1	1	0	utr_Tb927.8.3380
Tb927.7.7100	hypothetical protein	ZUnknown	0.0611	0.51	-0.6616	2.4e-07	1.65	2958	0	1	1	0	utr_Tb927.7.7100
Tb927.10.11590	nicotinate phosphoribosyltransferase, putative	Enzyme	-0.2814	0.000616	-0.9929	1.4e-13	1.64	214	0	1	1	0	utr_Tb927.10.11590
Tb927.3.4630	UDP-glucose:glycoprotein glucosyltransferase, ER quality control	Glycans	-0.1174	0.0683	-0.814	1.73e-10	1.62	250	0	1	1	0	utr_Tb927.3.4630
Tb927.3.2477	hypothetical protein	ZUnknown	-0.3165	0.072	-0.9928	3.81e-11	1.6	952	0	1	1	0	utr_Tb927.3.2477
Tb11.v5.0696	TerD domain containing protein, putative	ZUnknown	-0.0013	0.993	-0.6675	0.000321	1.59	299	0	1	1	0	utr_Tb11.v5.0696.1_2
Tb927.9.13990	DRBD2	RNA.binding	-0.2891	7.1e-05	-0.912	3.11e-23	1.54	3456	0	1	1	0	utr_Tb927.9.13990
Tb927.6.1780	MAPK4 protein kinase	Protein.kinase	-0.2535	0.00436	-0.8619	2.34e-11	1.52	628	0	1	1	0	utr_Tb927.6.1780
Tb927.11.7350	histone H2B variant V (H2BVAR)	Chromatin	0.3025	7.5e-06	-0.2797	0.000809	1.5	455	0	0	0	0	utr_Tb927.11.7350
Tb11.v5.0660	histone deacetylase, putative	Chromatin	-0.0997	0.387	-0.6843	2.18e-06	1.5	1047	0	1	1	0	utr_Tb11.v5.0660.1_2
Tb11.v5.0357	homocysteine S-methyltransferase, putative	Enzyme	0.1366	0.262	-0.4496	0.0558	1.5	341	0	0	0	0	utr_Tb11.v5.0357.1_2
Tb927.11.11110	NEK20 protein kinase	Protein.kinase	0.1714	0.187	-0.4172	0.0251	1.5	388	0	0	0	0	utr_Tb927.11.11110
Tb927.3.3940	DRBD11	RNA.binding	-0.391	9.38e-09	-0.974	5.95e-05	1.5	8067	0	1	1	0	utr_Tb927.3.3940
Tb11.v5.0637	hypothetical protein, conserved	ZUnknown	0.2882	0.0171	-0.2965	0.0667	1.5	1204	0	0	0	0	utr_Tb11.v5.0637.1_1
Tb927.10.8740	hypothetical protein	ZUnknown	0.7758	1.69e-13	0.1899	0.165	1.5	616	0	0	0	0	utr_Tb927.10.8740
Tb927.2.5250	tubulin-tyrosine ligase, putative	Cytoskeleton	0.2573	0.00104	-0.3156	0.107	1.49	140	0	0	0	0	utr_Tb927.2.5250
Tb927.9.15620	BARP protein	Membrane.protein	0.7402	2.54e-05	0.1647	0.803	1.49	480	0	0	0	0	utr_Tb927.9.15620
Tb927.2.2720	MEKK1 or FlaK protein kinase, putative	Protein.kinase	0.1193	0.123	-0.4562	6.59e-05	1.49	1952	0	0	0	0	utr_Tb927.2.2720
Tb927.1.2410	beta tubulin, pseudogene	Pseudogene	-0.6457	1.9e-23	-1.2238	0.167	1.49	0	0	0	1	0	utr_Tb927.1.2410
Tb927.6.5160	retrotransposon hot spot protein (RHS3, pseudogene), putative	RHS	0.4937	4.86e-08	-0.0832	0.811	1.49	3130	0	0	0	0	utr_Tb927.6.5160
Tb927.4.4490	multidrug resistance protein E,p-glycoprotein (MRPE)	Transporter	-0.2524	0.000236	-0.8245	5.03e-24	1.49	2112	0	1	1	0	utr_Tb927.4.4490
Tb927.11.9850	hypothetical protein, conserved	ZUnknown	0.5981	3.64e-05	0.0197	0.969	1.49	12	0	0	0	0	utr_Tb927.11.9850
Tb11.v5.0435	adenylosuccinate synthetase, putative	Enzyme	0.2667	0.000183	-0.3012	0.00631	1.48	1974	0	0	0	0	utr_Tb11.v5.0435.1_2
Tb927.7.4180	Elongase 3	Lipids	0.8676	8.26e-35	0.3052	0.00732	1.48	960	0	0	0	0	utr_Tb927.7.4180
Tb927.6.2420	p22 protein precursor, interacts with UBP1 in T. cruzi	Mito.pathway	0.0983	0.278	-0.4686	1.62e-06	1.48	365	0	0	0	0	utr_Tb927.6.2420
Tb927.7.2090	hypothetical protein, conserved, no clear yeast or human matches	ZUnknown	0.0575	0.665	-0.5036	3.08e-05	1.48	4040	0	0	0	0	utr_Tb927.7.2090
Tb927.5.3720	hypothetical protein, conserved	ZUnknown	1.1262	2.05e-21	0.5647	0.00107	1.48	410	0	0	0	0	utr_Tb927.5.3720
Tb927.10.4420	hypothetical protein	ZUnknown	0.1863	0.173	-0.3796	0.0409	1.48	418	0	0	0	0	utr_Tb927.10.4420
Tb927.5.3490	hypothetical protein, conserved, LRR-RI like domain	ZUnknown	0.2527	0.0213	-0.3118	0.214	1.48	175	0	0	0	0	utr_Tb927.5.3490
Tb927.3.5210	hypothetical protein, conserved	ZUnknown	0.4494	6.12e-06	-0.1176	0.423	1.48	1240	0	0	0	0	utr_Tb927.3.5210
Tb927.9.2590	hypothetical protein, conserved	ZUnknown	-0.4058	1.03e-10	-0.9756	2.27e-26	1.48	714	0	1	1	0	utr_Tb927.9.2590
Tb927.10.6000	hypothetical protein, conserved	ZUnknown	-0.1137	0.129	-0.6746	1.43e-11	1.48	1445	0	1	1	0	utr_Tb927.10.6000
Tb927.1.4300	chaperone DNAj, putative, J17	Chaperone	0.4559	2.35e-10	-0.0969	0.383	1.47	2748	0	0	0	0	utr_Tb927.1.4300
Tb927.8.5890	Anti-silencing function ASF1B	Chromatin	0.1399	0.221	-0.4185	0.0492	1.47	99	0	0	0	0	utr_Tb927.8.5890
Tb927.8.980	Phosphoacetylglucosamine mutase PAGM, acts as phosphoglucomutase	Glucose.glycerol	0.552	9.4e-19	-0.0013	0.991	1.47	1967	0	0	0	0	utr_Tb927.8.980
Tb927.11.1070	glycosomal transporter (GAT3)	Glycosome	-0.0189	0.824	-0.5699	2.38e-13	1.47	1082	0	0	0	0	utr_Tb927.11.1070
Tb927.10.5270	MKK5 protein kinase	Protein.kinase	0.4448	2.88e-05	-0.1087	0.695	1.47	342	0	0	0	0	utr_Tb927.10.5270
Tb927.3.3930	DRBD6B	RNA.binding	0.7964	3.11e-19	0.2398	0.58	1.47	2644	0	0	0	0	utr_Tb927.3.3930
Tb927.8.4500	eIF4G5	Translation	-0.0604	0.458	-0.621	1.21e-20	1.47	2407	0	1	1	0	utr_Tb927.8.4500
Tb927.2.6435	VSG pseudogene,variant surface glycoprotein, degenerate	VSG	0.649	NA	0.0934	NA	1.47	0	0	0	0	0	utr_Tb927.2.6435
Tb927.11.1720	hypothetical protein, conserved	ZUnknown	-0.0203	0.881	-0.5748	8.1e-07	1.47	534	0	0	0	0	utr_Tb927.11.1720
Tb11.v5.0902	hypothetical protein, conserved	ZUnknown	0.0532	0.711	-0.4992	2.81e-05	1.47	1483	0	0	0	0	utr_Tb11.v5.0902.1_2
Tb927.6.4000	small glutamine-rich tetratricopeptide repeat protein, putative (SGT)	ZUnknown	-0.6206	1.2e-20	-1.1731	3.14e-47	1.47	1342	0	1	1	0	utr_Tb927.6.4000
Tb927.9.15480	hypothetical protein	ZUnknown	-0.0444	0.787	-0.6043	0.0182	1.47	936	0	1	1	0	utr_Tb927.9.15480
Tb927.4.2460	kinatase, putative	Enzyme	0.1955	0.0143	-0.3464	0.00563	1.46	2585	0	0	0	0	utr_Tb927.4.2460
Tb927.4.1220	leucine-rich repeat protein (LRRP)	LRRP	0.2858	0.000213	-0.2614	0.384	1.46	84	0	0	0	0	utr_Tb927.4.1220
Tb11.v5.0346	BarP protein, putative	Membrane.protein	0.6137	2.1e-07	0.0643	0.609	1.46	2472	0	0	0	0	utr_Tb11.v5.0346.1_1
Tb927.11.900	isocitrate dehydrogenase, putative (IDH)	Mito.citric.acid.cycle	0.4574	1.52e-10	-0.0899	0.399	1.46	682	0	0	0	0	utr_Tb927.11.900
Tb927.6.5100	serine/threonine-protein kinase, putative	Protein.kinase	0.4682	1.42e-12	-0.0796	0.532	1.46	650	0	0	0	0	utr_Tb927.6.5100
Tb927.11.10810	PUF11	RNA.binding	0.0547	0.509	-0.4877	1.84e-05	1.46	2722	0	0	0	0	utr_Tb927.11.10810
Tb11.v5.0853	Vacuolar sorting protein 9 (VPS9) domain containing protein, putative	ZUnknown	0.0205	0.897	-0.5266	5.47e-10	1.46	2116	0	0	0	0	utr_Tb11.v5.0853.1_1
Tb927.10.14540	hypothetical protein	ZUnknown	0.1449	0.187	-0.3967	0.0726	1.46	3494	0	0	0	0	utr_Tb927.10.14540
Tb927.9.12790	dolichol kinase, putative	Glycans	0.7525	5.25e-26	0.2125	0.0781	1.45	1637	0	0	0	0	utr_Tb927.9.12790
Tb927.10.3260	Long-chain-fatty-acid--CoA ligase 5, Acyl-CoA synthetase 5 (LACS 5)	Lipids	-0.3218	5.54e-08	-0.8611	3.57e-19	1.45	1289	0	1	1	0	utr_Tb927.10.3260
Tb927.1.4490	acetyltransferase, putative	Lipids	-0.2769	0.0021	-0.8082	0.000167	1.45	2457	0	1	1	0	utr_Tb927.1.4490
Tb927.9.15510	BARP protein	Membrane.protein	0.2385	0.0858	-0.2942	0.684	1.45	0	0	0	0	0	utr_Tb927.9.15510
Tb927.9.7540	calpain-like cysteine peptidase, putative,cysteine peptidase, Clan CA, family C2, putative	Protease	-0.4016	1.64e-08	-0.9405	5.3e-15	1.45	2226	0	1	1	0	utr_Tb927.9.7540
Tb927.7.2550	proteasome regulatory ATPase subunit 5 (RPT5)	Ubiquitin.proteasome	-0.1052	0.258	-0.6371	3.92e-13	1.45	1174	0	1	1	0	utr_Tb927.7.2550
Tb11.v5.0338	hypothetical protein, conserved	ZUnknown	0.5861	2.8e-08	0.0504	0.549	1.45	3917	0	0	0	0	utr_Tb11.v5.0338.1_1
Tb927.5.2620	hypothetical protein, conserved, ubiquitin-like C-terminus, no yeast or human match	ZUnknown	0.657	1.07e-21	0.1185	0.701	1.45	3951	0	0	0	0	utr_Tb927.5.2620
Tb927.11.16150	tubulin binding cofactor A, putative	Cytoskeleton	-0.2433	0.0163	-0.7709	0.0022	1.44	81	0	1	1	0	utr_Tb927.11.16150
Tb927.9.15590	BARP protein	Membrane.protein	0.0892	0.755	-0.4381	0.0629	1.44	429	0	0	0	0	utr_Tb927.9.15590
Tb927.2.1820	protein kinase, putative	Protein.kinase	0.7102	3.73e-27	0.187	0.516	1.44	2588	0	0	0	0	utr_Tb927.2.1820
Tb927.2.1140	retrotransposon hot spot protein (RHS3, pseudogene), putative	RHS	0.159	0.172	-0.3657	0.0356	1.44	289	0	0	0	0	utr_Tb927.2.1140
Tb927.11.970	hypothetical protein, conserved	ZUnknown	0.2141	0.0783	-0.3123	0.492	1.44	6	0	0	0	0	utr_Tb927.11.970
Tb927.6.430	GRESAG 4, putative receptor-type adenylate cyclase	GRESAG	0.4605	1.35e-06	-0.052	0.651	1.43	2147	0	0	0	0	utr_Tb927.6.430
Tb927.5.2325	hypothetical protein	ZUnknown	0.9452	3.28e-14	0.4262	0.000428	1.43	665	0	0	0	0	utr_Tb927.5.2325
Tb927.5.2020	hypothetical protein, conserved	ZUnknown	0.3045	0.00197	-0.2115	0.0104	1.43	10416	0	0	0	0	utr_Tb927.5.2020
Tb927.10.620	hypothetical protein, conserved	ZUnknown	0.6326	3.68e-20	0.1116	0.268	1.43	1194	0	0	0	0	utr_Tb927.10.620
Tb927.8.3940	hypothetical protein, conserved	ZUnknown	0.6818	7.18e-15	0.1707	0.352	1.43	1501	0	0	0	0	utr_Tb927.8.3940
Tb927.8.4200	hypothetical protein, conserved, no domains, no yeast.human match	ZUnknown	0.5293	5.19e-13	0.0182	0.914	1.43	4629	0	0	0	0	utr_Tb927.8.4200
Tb927.8.6580	SDH1 succinate dehydrogenase (complex II) subunit, flavoprotein	Mito.e.transport	0.566	2.62e-12	0.0631	0.644	1.42	1866	0	0	0	0	utr_Tb927.8.6580
Tb927.11.17440	VSG pseudogene, degenerate	VSG	-0.8473	0.0512	-1.3529	NA	1.42	0	0	0	0	0	utr_Tb927.11.17440
Tb927.8.4600	Zinc finger, C3HC4 type (RING finger), putative	Zinc.finger	0.501	9.11e-09	-0.0038	0.982	1.42	702	0	0	0	0	utr_Tb927.8.4600
Tb927.11.8430	hypothetical protein, conserved	ZUnknown	0.9524	4.15e-36	0.4445	4.69e-07	1.42	1674	0	0	0	0	utr_Tb927.11.8430
Tb927.10.5880	Proteophosphoglycan, putative	ZUnknown	0.8539	2.18e-42	0.3487	0.00017	1.42	1925	0	0	0	0	utr_Tb927.10.5880
Tb927.6.690	hypothetical protein, conserved, no clear yeast or human matches	ZUnknown	1.2986	3.69e-68	0.7906	0.000785	1.42	7263	0	0	0	0	utr_Tb927.6.690
Tb927.3.5080	PSP1 C-terminal conserved region, putative	ZUnknown	0.3848	8.09e-07	-0.1177	0.742	1.42	3004	0	0	0	0	utr_Tb927.3.5080
Tb10.v4.0053	hypothetical protein, 411 kDa mostly peptide repeats	ZUnknown	-0.1585	0.0298	-0.6684	NA	1.42	0	0	0	0	0	utr_Tb10.v4.0053
Tb927.7.4515	Bardet-Biedl syndrome 18 protein	Cytoskeleton	0.4353	0.0217	-0.0616	0.856	1.41	108	0	0	0	0	utr_Tb927.7.4515
Tb927.4.1480	SNM1 DNA repair nuclease	DNA	0.3208	3.48e-07	-0.176	0.0522	1.41	868	0	0	0	0	utr_Tb927.4.1480
Tb927.9.15460	calcium motive p-type ATPase, putative	Ions	-0.1626	0.0111	-0.6569	0.00305	1.41	1642	0	1	1	0	utr_Tb927.9.15460
Tb927.2.690	leucine-rich repeat protein (LRRP)	LRRP	-0.5103	3.35e-11	-1.0109	7.98e-15	1.41	4542	0	1	0	0	utr_Tb927.2.690
Tb11.v5.0498	lysosomal alpha-mannosidase precursor, putative	Lysosome	0.5261	3.52e-14	0.0353	0.748	1.41	31531	0	0	0	0	utr_Tb11.v5.0498.1_1
Tb927.7.3910	NADH-ubiquinone oxidoreductase complex I subunit, putative	Mito.e.transport	0.2232	0.00833	-0.2695	0.293	1.41	78	0	0	0	0	utr_Tb927.7.3910
Tb927.10.8050	TFIIF-stimulated CTD phosphatase, putative	Protein.phosphatase	1.3365	2.09e-51	0.8388	8.94e-14	1.41	1894	0	0	0	0	utr_Tb927.10.8050
Tb927.2.5410	ABC transporter, putative	Transporter	-0.3443	7.37e-06	-0.8389	6.31e-10	1.41	643	0	1	1	0	utr_Tb927.2.5410
Tb927.7.4580	Cornifin (SPRR) family, putative	ZUnknown	0.1826	0.152	-0.3111	0.00503	1.41	1297	0	0	0	0	utr_Tb927.7.4580
Tb927.8.4900	hypothetical protein, conserved	ZUnknown	-0.0998	0.29	-0.5935	0.0652	1.41	35	0	0	0	0	utr_Tb927.8.4900
Tb927.7.7060	Got1/Sft2-like family, putative	ZUnknown	0.7206	3.28e-07	0.2256	0.107	1.41	797	0	0	0	0	utr_Tb927.7.7060
Tb927.10.6580	hypothetical protein	ZUnknown	0.5189	1.49e-14	0.0274	0.791	1.41	1861	0	0	0	0	utr_Tb927.10.6580
Tb927.10.920	Ribosomal protein L1p/L10e family, putative	ZUnknown	-0.1411	0.35	-0.6403	0.411	1.41	0	0	0	0	0	utr_Tb927.10.920
Tb927.10.3550	DNA repair helicase, putative	DNA	-0.0445	0.642	-0.5338	3.97e-05	1.4	377	0	0	0	0	utr_Tb927.10.3550
Tb927.11.9810	NUDIX hydrolase, homologue of YSA1	Enzyme	0.0111	0.928	-0.4695	0.0419	1.4	58	0	0	0	0	utr_Tb927.11.9810
Tb927.1.480	leucine-rich repeat protein (LRRP)	LRRP	-0.3518	0.000513	-0.8343	0.00434	1.4	1889	0	1	1	0	utr_Tb927.1.480
Tb927.7.3990	mitochondrial DNA polymerase I protein C (TbPOL1C)	Mito.DNA	0.2051	0.00295	-0.2761	0.0047	1.4	927	0	0	0	0	utr_Tb927.7.3990
Tb11.v5.0638	serine carboxypeptidase III precursor, putative (CBP1)	Protease	0.4213	3.98e-07	-0.0667	0.675	1.4	1057	0	0	0	0	utr_Tb11.v5.0638.1_2
Tb10.v4.0033	PUF1	RNA.binding	0.7169	1.42e-17	0.2339	0.0253	1.4	1793	0	0	0	0	utr_Tb10.v4.0033
Tb927.9.10640	synaptojanin (N-terminal domain), putative	Vesicular.transport	-0.0283	0.768	-0.5174	0.000205	1.4	411	0	0	0	0	utr_Tb927.9.10640
Tb11.v5.0622	variant surface glycoprotein (VSG, atypical), putative	VSG	0.4906	0.0639	0.0038	0.991	1.4	5880	0	0	0	0	utr_Tb11.v5.0622.1_1
Tb927.10.4750	hypothetical protein, conserved	ZUnknown	0.2685	0.000137	-0.2156	0.0214	1.4	1993	0	0	0	0	utr_Tb927.10.4750
Tb927.10.3960	hypothetical protein, conserved	ZUnknown	-0.089	0.636	-0.5728	4.31e-07	1.4	1537	0	0	0	0	utr_Tb927.10.3960
Tb927.3.1990	Tetratricopeptide repeat, putative	ZUnknown	0.1151	0.215	-0.3663	0.001	1.4	609	0	0	0	0	utr_Tb927.3.1990
Tb927.10.2760	ATPase family associated with various cellular activities (AAA), putative	ZUnknown	0.3714	1.52e-07	-0.1101	0.698	1.4	319	0	0	0	0	utr_Tb927.10.2760
Tb927.9.6130	calmodulin, putative	Calcium	0.4261	2.62e-09	-0.0505	0.583	1.39	1309	0	0	0	0	utr_Tb927.9.6130
Tb927.3.5160	BBP136	Cytoskeleton	-0.1633	0.0246	-0.6346	9.37e-07	1.39	462	0	1	1	0	utr_Tb927.3.5160
Tb927.8.6650	DRBD13	RNA.binding	1.1211	2.19e-44	0.6432	8.71e-07	1.39	4640	0	0	0	0	utr_Tb927.8.6650
Tb927.6.3490	ZFP1	RNA.binding	-0.0515	0.649	-0.5286	0.0577	1.39	6157	0	0	0	0	utr_Tb927.6.3490
Tb927.4.2265	hypothetical protein	ZUnknown	0.7953	2.16e-12	0.3249	0.079	1.39	606	0	0	0	0	utr_Tb927.4.2265
Tb927.4.3830	hypothetical protein, conserved	ZUnknown	-0.4224	0.00218	-0.8961	0.0854	1.39	21	0	0	0	0	utr_Tb927.4.3830
Tb927.11.210	hypothetical protein, conserved	ZUnknown	0.1561	0.0536	-0.3186	0.11	1.39	106	0	0	0	0	utr_Tb927.11.210
Tb927.11.2420	Tubulin-tyrosine ligase family, putative	ZUnknown	0.2233	0.00179	-0.2514	0.636	1.39	62	0	0	0	0	utr_Tb927.11.2420
Tb927.5.2390	hypothetical protein, conserved	ZUnknown	-0.3979	4.58e-07	-0.8768	5.79e-11	1.39	1465	0	1	1	0	utr_Tb927.5.2390
Tb927.4.4250	UDP-Gal or UDP-GlcNAc-dependent glycosyltransferase, putative	Glycans	-0.0702	0.518	-0.5337	0.00049	1.38	730	0	0	0	0	utr_Tb927.4.4250
Tb927.1.290	leucine-rich repeat protein (LRRP)	LRRP	-0.5611	4.4e-13	-1.0235	8.82e-14	1.38	1883	0	1	0	0	utr_Tb927.1.290
Tb927.3.4380	Tob55, SAM50	Mito.biogenesis	0.1326	0.206	-0.335	0.129	1.38	89	0	0	0	0	utr_Tb927.3.4380
Tb927.6.4180	POMP32	Mito.membrane	-0.3017	0.0005	-0.7673	4.03e-23	1.38	612	0	1	1	0	utr_Tb927.6.4180
Tb927.6.2300	Noa1 family protein, probably mitochondrial ribosome biogenesis,identifcal to 6.2350	Nucleotides	-0.4459	1.04e-08	-0.9128	1.8e-11	1.38	194	0	1	1	0	utr_Tb927.6.2300
Tb927.11.510	UBP2	RNA.binding	0.0721	0.509	-0.3943	0.000382	1.38	5790	0	0	0	0	utr_Tb927.11.510
Tb927.8.2160	multidrug resistance protein A,p-glycoprotein (PGPA)	Transporter	0.4466	2.92e-14	-0.0182	0.905	1.38	630	0	0	0	0	utr_Tb927.8.2160
Tb927.7.6690	Trypanosoma specific protein, unknown function	ZUnknown	0.0279	0.802	-0.4393	1.17e-05	1.38	2183	0	0	0	0	utr_Tb927.7.6690
Tb927.10.2930	hypothetical protein, conserved	ZUnknown	0.0615	0.572	-0.4073	0.000112	1.38	1782	0	0	0	0	utr_Tb927.10.2930
Tb927.5.3310	hypothetical protein, conserved	ZUnknown	0.087	0.413	-0.3784	0.000286	1.38	786	0	0	0	0	utr_Tb927.5.3310
Tb927.10.13530	hypothetical protein	ZUnknown	0.2713	0.00325	-0.1976	0.535	1.38	133	0	0	0	0	utr_Tb927.10.13530
Tb927.2.4590	branched-chain amino acid aminotransferase, putative	Amino.acids	-0.1845	0.00591	-0.6369	8.8e-11	1.37	1039	0	1	1	0	utr_Tb927.2.4590
Tb927.5.120	ESAG9, putative	ESAG	-2.0364	9.57e-39	-2.493	8.68e-102	1.37	1261	0	1	1	0	utr_Tb927.5.120
Tb927.11.5350	myo-inositol/proton symporter (MIT)	Glucose.glycerol	1.2347	3.63e-60	0.782	2.07e-21	1.37	1565	0	0	0	0	utr_Tb927.11.5350
Tb927.7.2420	GSK3-long glycogen synthase kinase-3 alpha	Glycans	0.7144	4.27e-25	0.2642	0.298	1.37	3332	0	0	0	0	utr_Tb927.7.2420
Tb11.v5.1022	protein kinase, putative	Protein.kinase	-0.0162	0.899	-0.4652	0.00013	1.37	2425	0	0	0	0	utr_Tb11.v5.1022.1_1
Tb927.2.4710	TRRM1	RNA.processing	-0.4502	3.57e-08	-0.9063	3.88e-18	1.37	1310	0	1	1	0	utr_Tb927.2.4710
Tb927.9.11810	membrane transporter protein, putative	Transporter	0.5696	1.06e-11	0.1168	0.442	1.37	220	0	0	0	0	utr_Tb927.9.11810
Tb927.10.3180	zinc-finger of acetyl-transferase ESCO, putative	Zinc.finger	-0.1243	0.32	-0.5751	1.47e-07	1.37	1110	0	0	0	0	utr_Tb927.10.3180
Tb927.10.2650	hypothetical protein, conserved	ZUnknown	-0.1109	0.222	-0.5615	1.09e-07	1.37	913	0	0	0	0	utr_Tb927.10.2650
Tb927.6.2530	hypothetical protein	ZUnknown	-0.121	0.493	-0.5777	1.45e-05	1.37	2178	0	0	0	0	utr_Tb927.6.2530
Tb11.v5.0809	TPR repeat, putative	ZUnknown	0.0144	0.917	-0.4429	2.26e-05	1.37	5536	0	0	0	0	utr_Tb11.v5.0809.1_1
Tb11.v5.0179	hypothetical protein, conserved	ZUnknown	-0.0171	0.907	-0.4676	0.162	1.37	64	0	0	0	0	utr_Tb11.v5.0179.1_2
Tb927.11.4950	hypothetical protein, conserved	ZUnknown	0.3164	1.35e-06	-0.137	0.289	1.37	3559	0	0	0	0	utr_Tb927.11.4950
Tb11.1400	hypothetical protein	ZUnknown	0.3904	0.33	-0.0611	0.762	1.37	394	0	0	0	0	utr_Tb11.1400.1_1
Tb927.11.12310	CRK12 cdc2- like protein kinase	Cell.cycle	0.054	0.536	-0.3893	3.88e-06	1.36	1052	0	0	0	0	utr_Tb927.11.12310
Tb927.11.15480	ACDP, HSP20-like chaperone	Chaperone	0.2233	0.0657	-0.2169	0.19	1.36	330	0	0	0	0	utr_Tb927.11.15480
Tb11.v5.0360	aminopeptidase, putative	Enzyme	0.5421	9.82e-10	0.1027	0.181	1.36	12428	0	0	0	0	utr_Tb11.v5.0360.1_1
Tb927.9.15550	BARP protein	Membrane.protein	0.1427	0.626	-0.3014	0.446	1.36	485	0	0	0	0	utr_Tb927.9.15550
Tb927.9.15380	NADH-ubiquinone oxidoreductase complex I subunit, putative,NDUFA9 subunit, putative	Mito.e.transport	0.4457	2.81e-06	0.0046	0.978	1.36	2145	0	0	0	0	utr_Tb927.9.15380
Tb927.9.9310	hypothetical protein, conserved	Mito.pathway	-0.7889	4.33e-30	-1.2323	1.04e-06	1.36	102	0	1	1	0	utr_Tb927.9.9310
Tb927.5.3170	ribose-phosphate pyrophosphokinase, putative (PRPS5)	PPP	-0.6306	9.97e-23	-1.0789	2.28e-33	1.36	1623	0	1	1	0	utr_Tb927.5.3170
Tb927.4.4230	RBP31	RNA.binding	0.3947	8.75e-07	-0.0438	0.736	1.36	3526	0	0	0	0	utr_Tb927.4.4230
Tb927.11.6450	Serine incorporator (Serinc), putative	ZUnknown	0.1861	0.0172	-0.2593	0.054	1.36	934	0	0	0	0	utr_Tb927.11.6450
Tb927.5.3130	hypothetical protein	ZUnknown	0.8307	4.36e-19	0.3895	0.00498	1.36	1909	0	0	0	0	utr_Tb927.5.3130
Tb927.4.1000	hypothetical protein, conserved	ZUnknown	0.561	1.25e-09	0.1211	0.246	1.36	3312	0	0	0	0	utr_Tb927.4.1000
Tb04.3I12.100	hypothetical protein	ZUnknown	-0.2291	0.148	-0.6745	0.000184	1.36	137	0	1	1	0	utr_Tb04.3I12.100
Tb927.10.12030	hypothetical protein, conserved	ZUnknown	-0.2152	0.0299	-0.6537	1.96e-08	1.36	3493	0	1	1	0	utr_Tb927.10.12030
Tb927.7.5550	hypothetical protein, conserved, TLD domain	Enzyme	0.6756	3.9e-10	0.2375	0.507	1.35	106	0	0	0	0	utr_Tb927.7.5550.1
Tb927.7.5550	hypothetical protein, conserved, TLD domain	Enzyme	0.6756	3.9e-10	0.2375	0.507	1.35	106	0	0	0	0	utr_Tb927.7.5550.2
Tb927.4.3750	GRESAG 4, putative receptor-type adenylate cyclase	GRESAG	-0.1836	0.0385	-0.6126	3.82e-07	1.35	3441	0	1	1	0	utr_Tb927.4.3750
Tb11.v5.0544	methionyl-tRNA formyltransferase, putative	Translation.tRNA	0.1296	0.205	-0.3013	0.000125	1.35	4138	0	0	0	0	utr_Tb11.v5.0544.1_2
Tb927.3.4090	pyruvate transporter PT3	Transporter	-0.1422	0.0267	-0.5699	1.95e-14	1.35	339	0	0	0	0	utr_Tb927.3.4090
Tb927.9.8400	predicted zinc finger protein, RING finger	Ubiquitin.proteasome	-0.1159	0.173	-0.554	0.0001	1.35	292	0	0	0	0	utr_Tb927.9.8400
Tb927.11.15320	hypothetical protein	ZUnknown	0.9508	2.4e-40	0.5209	3.3e-05	1.35	972	0	0	0	0	utr_Tb927.11.15320
Tb927.6.3960	Triose-phosphate Transporter family, putative	ZUnknown	0.1228	0.224	-0.3081	0.00146	1.35	1488	0	0	0	0	utr_Tb927.6.3960
Tb09.v4.0059	hypothetical protein	ZUnknown	0.7527	8.44e-09	0.3158	0.00521	1.35	1531	0	0	0	0	utr_Tb09.v4.0059
Tb11.v5.0224	invariant surface glycoprotein, putative	ZUnknown	0.1037	0.391	-0.3251	0.0553	1.35	799	0	0	0	0	utr_Tb11.v5.0224.1_2
Tb927.6.860	hypothetical protein	ZUnknown	0.1111	0.18	-0.3271	0.0685	1.35	1125	0	0	0	0	utr_Tb927.6.860
Tb927.11.9040	conserved protein	ZUnknown	0.2188	0.0822	-0.2113	0.199	1.35	140	0	0	0	0	utr_Tb927.11.9040
Tb927.1.4700	hypothetical protein, conserved	ZUnknown	0.545	1.76e-09	0.1105	0.548	1.35	687	0	0	0	0	utr_Tb927.1.4700
Tb927.1.1470	conserved protein, unknown function	ZUnknown	0.4995	3.08e-06	0.07	0.774	1.35	1633	0	0	0	0	utr_Tb927.1.1470
Tb927.7.4350	hypothetical protein, conserved	ZUnknown	0.1779	0.211	-0.2506	0.737	1.35	0	0	0	0	0	utr_Tb927.7.4350
Tb927.7.570	prefoldin, putative	Chaperone	0.0067	0.954	-0.4143	0.00208	1.34	434	0	0	0	0	utr_Tb927.7.570
Tb927.6.5050	V-type ATPase, C subunit, putative	Lysosome	0.6252	5.66e-18	0.1989	0.0774	1.34	318	0	0	0	0	utr_Tb927.6.5050
Tb927.4.5310	NEK12.3 protein kinase (RDK2)	Protein.kinase	0.2423	0.00249	-0.1853	0.156	1.34	4439	0	0	0	0	utr_Tb927.4.5310
Tb927.7.2370	40S ribosomal protein S15	Ribosome	-0.5466	2.13e-16	-0.9727	2.03e-49	1.34	70	0	1	1	0	utr_Tb927.7.2370
Tb927.7.4980	ZC3H23 POMP35	RNA.binding	-0.0106	0.941	-0.4281	0.177	1.34	64	0	0	0	0	utr_Tb927.7.4980
Tb927.10.2180	Rtr1/RPAP2 family, CTD phosphatase	RNA.synthesis	0.1353	0.33	-0.2914	0.0308	1.34	440	0	0	0	0	utr_Tb927.10.2180
Tb927.10.5970	predicted zinc finger protein	ZUnknown	0.2467	0.0184	-0.1806	0.265	1.34	958	0	0	0	0	utr_Tb927.10.5970
Tb927.9.10790	hypothetical protein, trypanosoma-specific	ZUnknown	0.1714	0.0639	-0.2477	0.0099	1.34	1834	0	0	0	0	utr_Tb927.9.10790
Tb11.v5.0743	Mitochondrial ribosomal death-associated protein 3, putative	ZUnknown	0.2147	0.371	-0.204	0.143	1.34	1306	0	0	0	0	utr_Tb11.v5.0743.1_2
Tb927.11.6610	hypothetical protein, conserved	ZUnknown	-0.1753	0.101	-0.5923	0.268	1.34	46	0	0	0	0	utr_Tb927.11.6610
Tb927.7.4970	glutamine synthetase, putative	Amino.acids	0.814	3.3e-14	0.3991	0.0324	1.33	347	0	0	0	0	utr_Tb927.7.4970
Tb927.7.6970	paraflagellar rod protein, putative	Cytoskeleton	0.0972	0.323	-0.3149	6.69e-05	1.33	2442	0	0	0	0	utr_Tb927.7.6970
Tb927.11.2880	KIN-A, kinesin, mitotic spindle	Cytoskeleton	0.4222	2.12e-10	0.0154	0.899	1.33	1006	0	0	0	0	utr_Tb927.11.2880
Tb927.2.910	ESAG4 pseudogene	ESAG.pseudo	-0.1385	0.14	-0.5518	0.136	1.33	2	0	0	0	0	utr_Tb927.2.910
Tb927.9.11640	hypothetical protein, conserved, predicted GPI anchor	Membrane.protein	0.0987	0.358	-0.316	0.00163	1.33	1553	0	0	0	0	utr_Tb927.9.11640
Tb927.10.3340	protein kinase, putative	Protein.kinase	-0.0849	0.431	-0.4945	0.000215	1.33	2418	0	0	0	0	utr_Tb927.10.3340
Tb927.1.350	retrotransposon hot spot protein (RHS, pseudogene), putative	RHS	-0.2906	0.00523	-0.6994	0.114	1.33	2	0	0	0	0	utr_Tb927.1.350
Tb927.7.250	ZC3H16	RNA.binding	0.0688	0.493	-0.341	0.14	1.33	54	0	0	0	0	utr_Tb927.7.250
Tb927.11.16550	ZC3H46	RNA.binding	0.4577	1.21e-08	0.0417	0.887	1.33	11397	0	0	0	0	utr_Tb927.11.16550
Tb927.10.9750	ubiquitin-protein ligase, putative (upl3)	Ubiquitin.proteasome	-0.0583	0.429	-0.4711	8.87e-09	1.33	2633	0	0	0	0	utr_Tb927.10.9750
Tb927.4.390	hypothetical protein, conserved	ZUnknown	-0.1667	0.456	-0.5743	0.0187	1.33	265	0	0	0	0	utr_Tb927.4.390
Tb927.6.870	myotubularin, putative	Cytoskeleton	0.5451	4.42e-21	0.1459	0.21	1.32	1309	0	0	0	0	utr_Tb927.6.870
Tb927.5.2410	KIN-E kinesin	Cytoskeleton	-0.3446	4.81e-06	-0.7447	1.02e-10	1.32	1129	0	1	1	0	utr_Tb927.5.2410
Tb927.9.12550	glycerol kinase, glycosomal (glk1)	Glucose.glycerol	-1.1605	5.71e-45	-1.5629	1.15e-94	1.32	638	0	1	1	0	utr_Tb927.9.12550
Tb927.8.1720	phosphatidylglycerolphosphate synthase, mitochondrial	Lipids	0.2382	0.0026	-0.1572	0.145	1.32	932	0	0	0	0	utr_Tb927.8.1720
Tb927.5.309b	ISG65/75-like protein	Membrane.protein	0.3401	9.72e-06	-0.0605	0.621	1.32	2117	0	0	0	0	utr_Tb927.5.309b
Tb927.11.7620	MSP-A, putative	Membrane.protein	1.4031	1.25e-12	0.9997	0.0523	1.32	0	0	0	0	0	utr_Tb927.11.7620
Tb927.11.5820	hypothetical protein, conserved, probably in mitochondrion, Inhibitor of apoptosis-promoting Bax1, putative	Mito.pathway	-0.0983	0.237	-0.5037	1.37e-07	1.32	278	0	0	0	0	utr_Tb927.11.5820
Tb927.7.7160	kinetoplastid-specific dual specificity phosphatase, putative	Phosphatase	0.2816	0.000128	-0.1223	0.208	1.32	2911	0	0	0	0	utr_Tb927.7.7160
Tb927.4.3620	protein phosphatase 1, putative	Protein.phosphatase	0.0617	0.552	-0.3343	3.68e-06	1.32	1921	0	0	0	0	utr_Tb927.4.3620
Tb927.5.4380	KPP1 kinetoplastid-specific phospho-protein phosphatase	Protein.phosphatase	0.687	2.45e-23	0.2828	0.0301	1.32	2790	0	0	0	0	utr_Tb927.5.4380
Tb927.11.500	UBP1	RNA.binding	0.0689	0.449	-0.3274	0.00406	1.32	4997	0	0	0	0	utr_Tb927.11.500
Tb927.6.350	hypothetical protein, conserved, T. brucei specific, 2 C2H2 Zn fingers	Zinc.finger	0.5153	2.24e-06	0.1197	0.262	1.32	1434	0	0	0	0	utr_Tb927.6.350
Tb927.11.170	hypothetical protein, conserved	ZUnknown	0.2694	0.000675	-0.1362	0.579	1.32	83	0	0	0	0	utr_Tb927.11.170
Tb927.10.8570	hypothetical protein, conserved	ZUnknown	-0.0293	0.793	-0.4299	0.000458	1.32	331	0	0	0	0	utr_Tb927.10.8570
Tb927.11.520	hypothetical protein, tryp specific	ZUnknown	0.8171	3.76e-26	0.4158	0.00115	1.32	924	0	0	0	0	utr_Tb927.11.520
Tb927.11.16710	hypothetical protein, conserved	ZUnknown	0.6901	4.27e-07	0.291	0.0478	1.32	404	0	0	0	0	utr_Tb927.11.16710
Tb927.7.980	hypothetical protein, conserved	ZUnknown	0.0947	0.291	-0.3035	0.0508	1.32	947	0	0	0	0	utr_Tb927.7.980
Tb927.7.6190	Ring finger domain containing protein, putative	ZUnknown	0.2089	0.0206	-0.1936	0.0998	1.32	3085	0	0	0	0	utr_Tb927.7.6190
Tb927.10.11400	WD domain, G-beta repeat, putative	ZUnknown	0.1198	0.227	-0.2827	0.527	1.32	71	0	0	0	0	utr_Tb927.10.11400
Tb11.v5.0375	hypothetical protein, conserved	ZUnknown	0.5827	2.17e-06	0.1788	0.626	1.32	4512	0	0	0	0	utr_Tb11.v5.0375.1_1
Tb927.9.12710	hypothetical protein, conserved	ZUnknown	0.3262	0.000438	-0.0792	0.73	1.32	211	0	0	0	0	utr_Tb927.9.12710
Tb927.10.150	hypothetical protein, conserved	ZUnknown	0.3535	0.0101	-0.0455	0.869	1.32	105	0	0	0	0	utr_Tb927.10.150.1
Tb927.10.150	hypothetical protein, conserved	ZUnknown	0.3535	0.0101	-0.0455	0.869	1.32	105	0	0	0	0	utr_Tb927.10.150.2
Tb927.8.7780	hypothetical protein, conserved	ZUnknown	-1.4937	5.45e-70	-1.8925	1.33e-48	1.32	397	0	1	1	0	utr_Tb927.8.7780
Tb927.11.16160	ATP binding protein-like protein	ZUnknown	-0.2343	0.00776	-0.6363	0.0351	1.32	30	0	1	1	0	utr_Tb927.11.16160
Tb927.11.16390	(CKS1 cyclin dependent kinases regulatory subunit, putative	Cell.cycle	0.6476	4.42e-09	0.2628	0.00527	1.31	1426	0	0	0	0	utr_Tb927.11.16390
Tb927.1.4310	FAZ2 flagellar attachment zone protein	Cytoskeleton	-0.3808	1.79e-07	-0.7739	2.69e-12	1.31	1724	0	1	1	0	utr_Tb927.1.4310
Tb927.11.960	ATPase, putative,cell division control protein 48 homolog, putative	Enzyme	0.1302	0.194	-0.2586	0.47	1.31	9	0	0	0	0	utr_Tb927.11.960
Tb927.9.12570	glycerol kinase, glycosomal (glk1)	Glucose.glycerol	-1.1863	6.99e-52	-1.5716	8.88e-55	1.31	640	0	1	1	0	utr_Tb927.9.12570
Tb927.6.190	GRESAG 4, putative receptor-type adenylate cyclase	GRESAG	0.3148	0.000119	-0.0721	0.571	1.31	669	0	0	0	0	utr_Tb927.6.190
Tb927.1.2120	calpain, putative,cysteine peptidase, Clan CA, family C2, putative	Protease	-0.4925	2.45e-13	-0.8774	5.55e-21	1.31	2921	0	1	1	0	utr_Tb927.1.2120
Tb927.11.8090	protein phosphatase 1, putative	Protein.phosphatase	-0.4451	9.1e-09	-0.8349	2.15e-33	1.31	2839	0	1	1	0	utr_Tb927.11.8090
Tb11.1800	retrotransposon hot spot protein (RHS, pseudogene), putative	RHS	1.0091	3.74e-19	0.6222	1.3e-06	1.31	1159	0	0	0	0	utr_Tb11.1800
Tb927.7.5340	CARP3	Signalling	1.0853	1.26e-76	0.6988	6.54e-15	1.31	1387	0	0	0	0	utr_Tb927.7.5340
Tb927.1.2190	RAPTOR-like (TOR complexes)	Signalling	-0.7731	1.69e-29	-1.1668	2.35e-45	1.31	1076	0	1	1	0	utr_Tb927.1.2190
Tb927.10.11940	ABC1 protein, putative	Transporter	0.4766	8.03e-10	0.0838	0.705	1.31	374	0	0	0	0	utr_Tb927.10.11940
Tb927.11.7213	ERV46-like, ER-Golgi transport vesicles	Vesicular.transport	-0.1041	0.361	-0.4974	0.00711	1.31	127	0	0	0	0	utr_Tb927.11.7213
Tb927.1.4370	Putative integral membrane protein conserved region (DUF2404), putative	ZUnknown	-0.017	0.871	-0.4076	0.000854	1.31	632	0	0	0	0	utr_Tb927.1.4370
Tb927.7.6260	TPR repeat, putative	ZUnknown	0.1982	0.0115	-0.195	0.068	1.31	1322	0	0	0	0	utr_Tb927.7.6260
Tb927.10.4020	hypothetical protein, conserved	ZUnknown	0.2535	0.0802	-0.1341	0.732	1.31	123	0	0	0	0	utr_Tb927.10.4020
Tb927.4.4520	hypothetical protein, conserved, , polyP and Q in middle	ZUnknown	0.3174	0.00129	-0.0671	0.833	1.31	4090	0	0	0	0	utr_Tb927.4.4520
Tb927.4.990	hypothetical protein, conserved	ZUnknown	-0.5349	5.95e-08	-0.9236	0.00607	1.31	96	0	1	1	0	utr_Tb927.4.990
Tb927.6.3820	hypothetical protein, conserved	ZUnknown	-0.5311	2.31e-15	-0.9153	7.87e-06	1.31	39	0	1	1	0	utr_Tb927.6.3820
Tb927.10.6330	KKT1	Cell.cycle	-0.2918	2.86e-05	-0.6689	2e-14	1.3	1025	0	1	1	0	utr_Tb927.10.6330
Tb927.8.7840	dynein heavy chain, putative, not a DHC in Wickstead analysis	Cytoskeleton	-0.6931	2.39e-16	-1.0665	4.91e-22	1.3	1601	0	1	1	0	utr_Tb927.8.7840
Tb927.9.3970	alpha/beta-hydrolase-like protein	Enzyme	-0.0741	0.591	-0.4563	1.38e-05	1.3	272	0	0	0	0	utr_Tb927.9.3970
Tb927.2.6000	GPI phospholipase C	GPI.anchors	-0.5036	2.59e-14	-0.8858	0.000134	1.3	3317	0	1	1	0	utr_Tb927.2.6000
Tb927.8.8020	monoglyceride lipase, putative	Lipids	-0.8734	1.83e-12	-1.2549	3.14e-20	1.3	1359	0	1	1	0	utr_Tb927.8.8020
Tb927.11.5530	Mitochondrial LSU-associated	Mito.pathway	-0.0053	0.972	-0.3808	0.108	1.3	97	0	0	0	0	utr_Tb927.11.5530
Tb927.5.4330	dihydrolipoamide branched chain transacylase, putative	Mito.pathway	0.5967	1.16e-13	0.2221	0.163	1.3	249	0	0	0	0	utr_Tb927.5.4330
Tb927.9.3120	protein kinase, putative	Protein.kinase	0.207	0.00534	-0.177	0.508	1.3	93	0	0	0	0	utr_Tb927.9.3120
Tb927.3.3960	DRBD6A	RNA.binding	1.1246	8.76e-40	0.7424	0.022	1.3	2073	0	0	0	0	utr_Tb927.3.3960
Tb11.v5.0152	ribosomal RNA processing protein 4, putative	rRNA.tRNA.process	-0.1094	0.506	-0.4896	0.172	1.3	49	0	0	0	0	utr_Tb11.v5.0152.1_1
Tb927.7.690	zinc finger protein, putative	Zinc.finger	0.5166	8.94e-10	0.1432	0.648	1.3	1920	0	0	0	0	utr_Tb927.7.690
Tb927.11.4180	PSP1 C-terminal conserved region, putative	ZUnknown	0.0766	0.324	-0.2993	0.000892	1.3	2023	0	0	0	0	utr_Tb927.11.4180
Tb927.9.2891	Domain of unknown function (DUF5075), putative	ZUnknown	0.7961	6.77e-16	0.4164	0.0133	1.3	745	0	0	0	0	utr_Tb927.9.2891
Tb927.9.2940	hypothetical protein, conserved	ZUnknown	0.11	0.169	-0.2719	0.0259	1.3	559	0	0	0	0	utr_Tb927.9.2940
Tb927.9.5330	Putative papain-like cysteine peptidase (DUF1796), putative	ZUnknown	0.1115	0.244	-0.2637	0.293	1.3	95	0	0	0	0	utr_Tb927.9.5330
Tb927.11.310	hypothetical protein, conserved	ZUnknown	0.3018	0.000262	-0.0806	0.614	1.3	571	0	0	0	0	utr_Tb927.11.310
Tb11.v5.0226	invariant surface glycoprotein, putative	ZUnknown	0.4315	0.000538	0.0531	0.82	1.3	1308	0	0	0	0	utr_Tb11.v5.0226.1_2
Tb927.8.1280	hypothetical protein, conserved	ZUnknown	-0.2914	3e-05	-0.6721	1.23e-20	1.3	1838	0	1	1	0	utr_Tb927.8.1280
Tb927.6.4710	calmodulin, putative	Calcium	-0.1642	0.0601	-0.5274	2e-10	1.29	781	0	0	0	0	utr_Tb927.6.4710
Tb11.v5.0535	minichromosome maintenance (MCM) complex subunit, putative	Chromatin	0.1222	0.336	-0.243	0.00178	1.29	4113	0	0	0	0	utr_Tb11.v5.0535.1_1
Tb927.8.6830	Kinesin-like but poor match	Cytoskeleton	0.0014	0.99	-0.3711	1.53e-05	1.29	1073	0	0	0	0	utr_Tb927.8.6830
Tb927.2.5180	aldo-keto reductase, putative	Enzyme	0.0331	0.762	-0.337	0.125	1.29	59	0	0	0	0	utr_Tb927.2.5180
Tb927.10.5750	protocatechuate 4,5-dioxygenase-like protein	Enzyme	0.2654	0.00814	-0.1047	0.468	1.29	596	0	0	0	0	utr_Tb927.10.5750
Tb11.v5.0546	receptor-type adenylate cyclase GRESAG 4, putative	ESAG	0.3822	6.74e-06	0.0104	0.902	1.29	13579	0	0	0	0	utr_Tb11.v5.0546.1_1
Tb927.5.330	GRESAG 4, putative receptor-type adenylate cyclase	GRESAG	0.9608	5.83e-32	0.5944	2.13e-06	1.29	1148	0	0	0	0	utr_Tb927.5.330
Tb927.8.950	hypothetical protein, conserved, predicted GPI anchor	Membrane.protein	0.7086	5.36e-21	0.3464	0.016	1.29	362	0	0	0	0	utr_Tb927.8.950
Tb927.7.1080	hypothetical protein, conserved	Mito.pathway	0.0389	0.747	-0.3282	0.19	1.29	138	0	0	0	0	utr_Tb927.7.1080
Tb927.10.1940	serine/threonine-protein kinase, putative	Protein.kinase	-0.1258	0.352	-0.4956	0.12	1.29	121	0	0	0	0	utr_Tb927.10.1940
Tb927.1.300	retrotransposon hot spot protein (RHS, pseudogene), putative	RHS	-0.2787	0.00221	-0.6416	0.000109	1.29	965	0	1	1	0	utr_Tb927.1.300
Tb927.10.140	hypothetical protein	ZUnknown	0.7501	0.402	0.3789	6.2e-06	1.29	2895	0	0	0	0	utr_Tb927.10.140
Tb927.11.10920	hypothetical protein, conserved	ZUnknown	-0.177	0.0726	-0.5474	6.42e-06	1.29	889	0	0	0	0	utr_Tb927.11.10920
Tb927.8.860	hypothetical protein, conserved	ZUnknown	-0.0816	0.587	-0.4502	0.00027	1.29	1641	0	0	0	0	utr_Tb927.8.860
Tb927.6.2820	hypothetical protein, conserved	ZUnknown	0.0282	0.841	-0.3429	0.0196	1.29	897	0	0	0	0	utr_Tb927.6.2820
Tb927.10.3680	hypothetical protein, conserved	ZUnknown	0.1521	0.153	-0.2161	0.0676	1.29	768	0	0	0	0	utr_Tb927.10.3680
Tb927.6.4760	T-complex protein 11, putative	ZUnknown	0.1243	0.12	-0.246	0.208	1.29	99	0	0	0	0	utr_Tb927.6.4760
Tb927.7.5100	hypothetical protein, conserved	ZUnknown	0.1575	0.0989	-0.2132	0.418	1.29	126	0	0	0	0	utr_Tb927.7.5100
Tb927.11.5150	hypothetical protein, conserved, no homologues	ZUnknown	0.044	0.677	-0.3197	0.0147	1.29	434	0	0	0	0	utr_Tb927.11.5150
Tb927.10.2280	hypothetical protein, conserved	ZUnknown	0.0268	0.843	-0.3369	0.0487	1.29	555	0	0	0	0	utr_Tb927.10.2280
Tb927.9.15330	U3 small nucleolar RNA-associated protein 6, putative	ZUnknown	-0.1872	0.0435	-0.5549	0.0632	1.29	51	0	0	0	0	utr_Tb927.9.15330
Tb927.10.6120	Peptidase M76 family, putative	ZUnknown	-0.049	0.805	-0.4125	0.16	1.29	202	0	0	0	0	utr_Tb927.10.6120
Tb927.10.4810	hypothetical protein, conserved	ZUnknown	0.4817	0.00178	0.1175	0.537	1.29	548	0	0	0	0	utr_Tb927.10.4810
Tb927.10.5190	Kinesin associated protein, putative	ZUnknown	0.3803	0.000943	0.0155	0.927	1.29	2638	0	0	0	0	utr_Tb927.10.5190
Tb927.8.6640	NAD(P) binding protein, putative	ZUnknown	-0.6096	1.51e-18	-0.9758	8.79e-27	1.29	1497	0	1	1	0	utr_Tb927.8.6640
Tb927.8.770	hypothetical protein, conserved	ZUnknown	-0.4232	1.86e-07	-0.7912	4.86e-22	1.29	1251	0	1	1	0	utr_Tb927.8.770
Tb927.3.5130	exonuclease, putative	ZUnknown	-0.4392	2.78e-05	-0.8116	3.57e-17	1.29	1124	0	1	1	0	utr_Tb927.3.5130
Tb927.4.370	hypothetical protein, conserved	ZUnknown	-0.274	0.0802	-0.6434	1.43e-05	1.29	1333	0	1	1	0	utr_Tb927.4.370
Tb927.10.15350	histone H3 variant V (h3vaR)	Chromatin	-0.4538	0.000122	-0.8135	0.000846	1.28	4641	0	1	1	0	utr_Tb927.10.15350
Tb927.10.870	FRW1 myosin-like, or KLIF1	Cytoskeleton	-0.0396	0.665	-0.3924	0.00105	1.28	476	0	0	0	0	utr_Tb927.10.870
Tb11.v5.0392	kinesin heavy chain, putative	Cytoskeleton	0.3411	0.0519	-0.0111	0.954	1.28	1271	0	0	0	0	utr_Tb11.v5.0392.1_1
Tb11.v5.0456	receptor-type adenylate cyclase GRESAG 4, putative	ESAG	0.2493	0.132	-0.1039	0.25	1.28	6719	0	0	0	0	utr_Tb11.v5.0456.1_1
Tb927.1.4910	ESAG1, putative	ESAG	-0.3592	7.12e-05	-0.7173	1.15e-09	1.28	331	0	1	1	0	utr_Tb927.1.4910
Tb927.9.12630	glycerol kinase, glycosomal (glk1)	Glucose.glycerol	-1.173	9.55e-54	-1.5243	5.38e-86	1.28	580	0	1	1	0	utr_Tb927.9.12630
Tb927.9.12610	glycerol kinase, glycosomal (glk1)	Glucose.glycerol	-1.1688	6.78e-45	-1.5285	1.12e-58	1.28	641	0	1	1	0	utr_Tb927.9.12610
Tb927.11.4220	palmitoyl acyltransferase 6, putative	Lipids	-0.0091	0.943	-0.3689	0.0191	1.28	739	0	0	0	0	utr_Tb927.11.4220
Tb927.9.12170	leucine-rich repeat protein (LRRP)	LRRP	0.3559	1.22e-06	-0.0004	0.998	1.28	4471	0	0	0	0	utr_Tb927.9.12170
Tb927.10.11260	SSU ribosomal protein, mitochondrial, putative	Mito.translation	0.2647	0.0295	-0.0863	0.847	1.28	53	0	0	0	0	utr_Tb927.10.11260
Tb927.10.6460	protein phosphatase 2B, putative	Protein.phosphatase	0.1882	0.0483	-0.1691	0.657	1.28	25	0	0	0	0	utr_Tb927.10.6460
Tb927.6.1700	hypothetical protein, LIM-type zinc finger	Zinc.finger	0.4731	1.19e-05	0.1129	0.59	1.28	110	0	0	0	0	utr_Tb927.6.1700
Tb927.5.1050	hypothetical protein	ZUnknown	0.9335	1.26e-13	0.5817	5.2e-12	1.28	2231	0	0	0	0	utr_Tb927.5.1050
Tb11.v5.0823	hypothetical protein, conserved	ZUnknown	-0.1095	0.352	-0.4635	4.13e-09	1.28	2707	0	0	0	0	utr_Tb11.v5.0823.1_2
Tb11.v5.0508	hypothetical protein, conserved	ZUnknown	-0.0377	0.837	-0.3919	3.8e-06	1.28	787	0	0	0	0	utr_Tb11.v5.0508.1_2
Tb927.7.5860	hypothetical protein	ZUnknown	0.0172	0.919	-0.3421	0.0124	1.28	765	0	0	0	0	utr_Tb927.7.5860
Tb927.5.3570	hypothetical protein, conserved	ZUnknown	0.0019	0.99	-0.3491	0.0182	1.28	473	0	0	0	0	utr_Tb927.5.3570
Tb927.9.15070	hypothetical protein, conserved	ZUnknown	0.1729	0.00982	-0.1783	0.0468	1.28	576	0	0	0	0	utr_Tb927.9.15070
Tb927.10.9320	hypothetical protein, conserved	ZUnknown	0.7274	9.58e-08	0.3659	0.287	1.28	284	0	0	0	0	utr_Tb927.10.9320
Tb927.10.9100	hypothetical protein, conserved	ZUnknown	0.0521	0.642	-0.3021	0.3	1.28	66	0	0	0	0	utr_Tb927.10.9100
Tb927.11.10360	hypothetical protein, conserved	ZUnknown	0.1925	0.0462	-0.1672	0.315	1.28	259	0	0	0	0	utr_Tb927.11.10360
Tb927.9.8240	hypothetical protein, conserved, no good matches	ZUnknown	0.1975	0.045	-0.164	0.349	1.28	594	0	0	0	0	utr_Tb927.9.8240
Tb05.5K5.60	hypothetical protein, conserved	ZUnknown	0.0709	0.63	-0.29	0.354	1.28	58	0	0	0	0	utr_Tb05.5K5.60
Tb927.11.14940	hypothetical protein, conserved	ZUnknown	0.2175	0.0211	-0.1354	0.774	1.28	122	0	0	0	0	utr_Tb927.11.14940
Tb927.9.15850	hypothetical protein	ZUnknown	-0.6732	0.00158	-1.024	4.94e-11	1.28	3213	0	1	1	0	utr_Tb927.9.15850
Tb927.8.4750	amino acid transporter, AAT5, Arg, His, Lys	Amino.acids	1.0905	9.61e-09	0.749	2.59e-15	1.27	1401	0	0	0	0	utr_Tb927.8.4750
Tb927.10.5180	TPR-repeat-containing chaperone protein DNAJ, putative	Chaperone	-0.1014	0.244	-0.4506	3.42e-05	1.27	1295	0	0	0	0	utr_Tb927.10.5180
Tb927.11.16270	DNAexcision repair helicase XPBR	DNA	0.0722	0.392	-0.2711	6.63e-05	1.27	927	0	0	0	0	utr_Tb927.11.16270
Tb927.8.3860	CIA1 Cytosolic iron-sulphur cluster biogenesis	Enzyme	0.2054	0.075	-0.1377	0.745	1.27	71	0	0	0	0	utr_Tb927.8.3860
Tb927.11.2730	UDP-galactose 4-epimerase (galE)	Glycans	-0.1087	0.19	-0.4519	2.92e-07	1.27	1285	0	0	0	0	utr_Tb927.11.2730
Tb927.4.5240	UDP-Gal or UDP-GlcNAc-dependent glycosyltransferase, putative	Glycans	0.1254	0.32	-0.2216	0.0573	1.27	1356	0	0	0	0	utr_Tb927.4.5240
Tb927.9.10310	mitochondrial carrier protein, MCP11	Mito.transport	-0.0161	0.884	-0.3642	3.49e-05	1.27	171	0	0	0	0	utr_Tb927.9.10310
Tb927.4.5200	TbNup62 Inner ring, FG Nup facing both sides	Nuclear.transport	-0.0756	0.551	-0.4185	0.0495	1.27	80	0	0	0	0	utr_Tb927.4.5200
Tb927.10.11760	PUF6	RNA.binding	0.026	0.757	-0.315	0.0121	1.27	3513	0	0	0	0	utr_Tb927.10.11760
Tb927.3.1930	CDC40 / PRP17	RNA.processing	0.1843	0.0478	-0.1641	0.605	1.27	43	0	0	0	0	utr_Tb927.3.1930
Tb927.5.470	Riboflavin transporter	Transporter	1.1883	6.88e-35	0.8425	0.000576	1.27	462	0	0	0	0	utr_Tb927.5.470
Tb927.5.3610	adaptin complex AP3 delta subunit	Vesicular.transport	0.1064	0.135	-0.2399	0.0181	1.27	559	0	0	0	0	utr_Tb927.5.3610
Tb927.7.6370	Zinc finger, C3HC4 type (RING finger), putative	Zinc.finger	0.0827	0.657	-0.2592	0.445	1.27	181	0	0	0	0	utr_Tb927.7.6370
Tb927.7.6100	hypothetical protein	ZUnknown	0.0435	0.754	-0.3065	0.000957	1.27	2184	0	0	0	0	utr_Tb927.7.6100
Tb927.7.5240	hypothetical protein, conserved, low homologies, no domains	ZUnknown	0.5538	3.34e-12	0.2088	0.0515	1.27	1528	0	0	0	0	utr_Tb927.7.5240
Tb927.8.7770	aldehyde dehydrogenase family, putative	ZUnknown	0.0773	0.507	-0.2671	0.0859	1.27	569	0	0	0	0	utr_Tb927.8.7770
Tb11.v5.0155	hypothetical protein, conserved	ZUnknown	0.4581	0.0196	0.1166	0.363	1.27	1450	0	0	0	0	utr_Tb11.v5.0155.1_1
Tb927.11.14770	hypothetical protein, conserved	ZUnknown	0.2434	0.0183	-0.0986	0.466	1.27	804	0	0	0	0	utr_Tb927.11.14770
Tb927.10.9180	PRA1 family protein, putative	ZUnknown	0.419	9.52e-07	0.071	0.638	1.27	773	0	0	0	0	utr_Tb927.10.9180
Tb927.9.5300	hypothetical protein, conserved	ZUnknown	0.2777	0.0094	-0.0628	0.691	1.27	586	0	0	0	0	utr_Tb927.9.5300
Tb927.9.4920	hypothetical protein, conserved	ZUnknown	0.1893	0.151	-0.1577	0.714	1.27	20	0	0	0	0	utr_Tb927.9.4920
Tb927.1.400	hypothetical protein, conserved	ZUnknown	0.2908	0.0488	-0.0503	0.862	1.27	2904	0	0	0	0	utr_Tb927.1.400
Tb927.10.4970	hypothetical protein, conserved	ZUnknown	0.2892	0.0106	-0.0524	0.888	1.27	32	0	0	0	0	utr_Tb927.10.4970
Tb927.5.2320	Mak10 subunit, NatC N(alpha)-terminal acetyltransferase, putative	ZUnknown	-0.2729	1.8e-05	-0.6216	3.46e-12	1.27	847	0	1	1	0	utr_Tb927.5.2320
Tb927.11.14080	CYC2, G1 cyclin	Cell.cycle	-0.2327	0.00875	-0.562	7.76e-07	1.26	3763	0	0	0	0	utr_Tb927.11.14080
Tb927.4.880	TPR-repeat-containing chaperone protein DNAJ, putative	Chaperone	-0.3435	1.4e-05	-0.6766	3.02e-05	1.26	155	0	1	1	0	utr_Tb927.4.880
Tb927.2.2670	histone H4 variant	Chromatin	-0.7275	1.34e-25	-1.0563	8.36e-43	1.26	1651	0	1	1	0	utr_Tb927.2.2670
Tb927.7.7000	hook complex protein, conserved	Cytoskeleton	-0.0769	0.316	-0.4117	0.000354	1.26	362	0	0	0	0	utr_Tb927.7.7000
Tb927.10.5510	endonuclease/exonuclease/phosphatase, putative	DNA	0.0477	0.614	-0.2857	0.048	1.26	173	0	0	0	0	utr_Tb927.10.5510
Tb927.9.12590	glycerol kinase, glycosomal (glk1)	Glucose.glycerol	-1.1414	1.6e-39	-1.4789	3.39e-74	1.26	575	0	1	1	0	utr_Tb927.9.12590
Tb927.9.9410	inositol phosphorylceramide synthase (SLS1)	Lipids	0.1857	0.0318	-0.1512	0.244	1.26	1199	0	0	0	0	utr_Tb927.9.9410
Tb927.10.4880	hypothetical protein, possible component of cytochorome oxidase complex	Mito.e.transport	0.8095	6.25e-24	0.473	4e-05	1.26	325	0	0	0	0	utr_Tb927.10.4880
Tb927.11.2930	Possible mitochondrial membrane protein	Mito.membrane	0.0072	0.962	-0.3311	0.00332	1.26	836	0	0	0	0	utr_Tb927.11.2930
Tb927.7.3770	YjeF family N-terminal domain/YjeF family C-terminal domain containing protein, putative	Mito.pathway	0.0704	0.477	-0.2591	0.292	1.26	92	0	0	0	0	utr_Tb927.7.3770
Tb927.1.840	transmembrane protein, putative	Mito.pathway	0.1969	0.0729	-0.1334	0.738	1.26	191	0	0	0	0	utr_Tb927.1.840
Tb927.10.10750	metallo-peptidase, Clan MC, Family M14, putative	Protease	0.0206	0.825	-0.3075	0.0324	1.26	228	0	0	0	0	utr_Tb927.10.10750
Tb927.10.3700	AMPKgamma	Protein.kinase	-0.123	0.22	-0.4555	6.32e-05	1.26	1170	0	0	0	0	utr_Tb927.10.3700
Tb927.7.4090	serine/threonine-protein kinase, putative	Protein.kinase	0.2755	0.000118	-0.0606	0.602	1.26	966	0	0	0	0	utr_Tb927.7.4090
Tb07.30D13.60	hypothetical protein, conserved (pseudogene)	Pseudogene	-0.1692	0.222	-0.508	0.00346	1.26	972	0	0	0	0	utr_Tb07.30D13.60
Tb927.2.490	DNA-directed RNA polymerase, pseudogene	Pseudogene	0.1683	0.115	-0.1652	0.673	1.26	2	0	0	0	0	utr_Tb927.2.490
Tb927.8.6033	60S ribosomal protein L41	Ribosome	0.0495	0.906	-0.283	0.000356	1.26	250	0	0	0	0	utr_Tb927.8.6033
Tb927.3.5250	ZC3H8	RNA.binding	-0.1129	0.195	-0.4489	1.31e-05	1.26	2332	0	0	0	0	utr_Tb927.3.5250
Tb927.11.12750	CPSF30	RNA.processing	0.0964	0.477	-0.2349	0.217	1.26	216	0	0	0	0	utr_Tb927.11.12750
Tb927.1.2850	pteridine transporter, putative	Transporter	0.9608	1.34e-25	0.6275	1.8e-07	1.26	571	0	0	0	0	utr_Tb927.1.2850
Tb927.3.4720	dynamin DLP1	Vesicular.transport	-0.0958	0.169	-0.4329	2.78e-08	1.26	713	0	0	0	0	utr_Tb927.3.4720
Tb11.v5.0581	exocyst complex component specific domain containing protein, Sec8	Vesicular.transport	0.0339	0.757	-0.3023	2.54e-06	1.26	12770	0	0	0	0	utr_Tb11.v5.0581.1_1
Tb927.11.1610	Exocyst complex component Sec6	Vesicular.transport	0.1625	0.0236	-0.1743	0.12	1.26	408	0	0	0	0	utr_Tb927.11.1610
Tb927.9.3100	hypothetical protein, conserved	ZUnknown	0.1862	0.0365	-0.147	0.208	1.26	341	0	0	0	0	utr_Tb927.9.3100
Tb927.11.6040	Nodulin-like, putative	ZUnknown	0.3908	2.74e-05	0.0594	0.762	1.26	723	0	0	0	0	utr_Tb927.11.6040
Tb927.11.1570	hypothetical protein, conserved no matches	ZUnknown	0.367	4.74e-06	0.0329	0.827	1.26	1096	0	0	0	0	utr_Tb927.11.1570
Tb11.v5.0238	Kinesin associated protein, putative	ZUnknown	0.3679	0.000987	0.0348	0.832	1.26	2638	0	0	0	0	utr_Tb11.v5.0238.1_1
Tb927.8.6670	hypothetical protein, conserved	ZUnknown	0.0135	0.924	-0.316	0.327	1.26	29	0	0	0	0	utr_Tb927.8.6670
Tb927.10.10720	Tetraspanin family, putative	ZUnknown	0.3579	4.16e-05	0.0284	0.799	1.26	616	0	0	0	0	utr_Tb927.10.10720
Tb927.8.8200	hypothetical protein, conserved	ZUnknown	-0.8462	3.23e-21	-1.1828	2.3e-25	1.26	489	0	1	1	0	utr_Tb927.8.8200
Tb927.11.1420	hypothetical protein, conserved	ZUnknown	-1.4759	1.57e-124	-1.8037	2.28e-47	1.26	462	0	1	1	0	utr_Tb927.11.1420
Tb927.1.1500	conserved protein, unknown function	ZUnknown	-0.4546	1.68e-10	-0.7879	5.46e-13	1.26	3953	0	1	1	0	utr_Tb927.1.1500
Tb927.4.3930	amino acid transporter, putative	Amino.acid.transport	-1.0494	5.51e-54	-1.367	2.87e-62	1.25	787	0	1	1	0	utr_Tb927.4.3930
Tb927.11.11290	heat shock protein 70, HSP70c	Chaperone	-0.1395	0.0475	-0.4643	0.000435	1.25	269	0	0	0	0	utr_Tb927.11.11290
Tb927.10.14470	intraflagellar transport protein IFT140	Cytoskeleton	0.1236	0.0692	-0.2008	0.01	1.25	764	0	0	0	0	utr_Tb927.10.14470
Tb927.10.13800	hypothetical protein, conserved, no yeast or human match	Cytoskeleton	-0.3287	1.31e-05	-0.6495	1.95e-18	1.25	2603	0	1	1	0	utr_Tb927.10.13800
Tb927.1.600	phosphate-repressible phosphate permease, putative	Ions	0.1741	0.0224	-0.1446	0.0851	1.25	1518	0	0	0	0	utr_Tb927.1.600
Tb927.7.1240	Sphingosine kinase	Lipids	0.2089	0.00476	-0.1161	0.232	1.25	936	0	0	0	0	utr_Tb927.7.1240
Tb927.10.5980	leucine-rich repeat protein (LRRP)	LRRP	-0.0657	0.555	-0.3928	0.000823	1.25	982	0	0	0	0	utr_Tb927.10.5980
Tb927.6.130	leucine-rich repeat protein LRRP, pseudogene	LRRP	-0.5646	7.84e-09	-0.8906	1.38e-10	1.25	3873	0	1	1	0	utr_Tb927.6.130
Tb927.10.220	60S ribosomal protein L37a	Ribosome	-0.0001	0.999	-0.3214	0.000228	1.25	92	0	0	0	0	utr_Tb927.10.220
Tb927.3.5620	FACT complex subunit SPT16	RNA.synthesis	-0.0481	0.585	-0.3657	1.36e-05	1.25	804	0	0	0	0	utr_Tb927.3.5620
Tb927.7.4400	IP6K IP6 kinase	Signalling	-0.182	0.0559	-0.5081	3.32e-08	1.25	1811	0	0	0	0	utr_Tb927.7.4400
Tb927.11.6030	ras-like small GTPase, putative (TbRLP)	Signalling	-0.3356	0.0315	-0.6599	0.00166	1.25	140	0	1	1	0	utr_Tb927.11.6030
Tb11.v5.0570	Zinc finger, C3HC4 type (RING finger), putative	Zinc.finger	0.2045	0.0836	-0.1228	0.234	1.25	1275	0	0	0	0	utr_Tb11.v5.0570.1_1
Tb927.8.1500	hypothetical protein, conserved, copurifies with MKT1	ZUnknown	-0.1763	0.0342	-0.4963	1.93e-11	1.25	1616	0	0	0	0	utr_Tb927.8.1500
Tb927.11.5230	hypothetical protein, conserved	ZUnknown	0.0332	0.773	-0.2903	0.00798	1.25	379	0	0	0	0	utr_Tb927.11.5230
Tb927.11.3040	hypothetical protein	ZUnknown	0.5729	0.000131	0.2551	0.0455	1.25	724	0	0	0	0	utr_Tb927.11.3040
Tb11.v5.0598	GIY-YIG catalytic domain containing protein, putative	ZUnknown	0.549	5.24e-08	0.2248	0.0805	1.25	1384	0	0	0	0	utr_Tb11.v5.0598.1_1
Tb927.4.2420	hypothetical protein, conserved	ZUnknown	0.1409	0.359	-0.1814	0.215	1.25	539	0	0	0	0	utr_Tb927.4.2420
Tb927.9.700	hypothetical protein	ZUnknown	0.1497	0.403	-0.1766	0.306	1.25	428	0	0	0	0	utr_Tb927.9.700
Tb927.3.4060	asparagine synthase, putative	ZUnknown	0.1126	0.226	-0.2083	0.454	1.25	43	0	0	0	0	utr_Tb927.3.4060
Tb927.11.12000	hypothetical protein, conserved	ZUnknown	0.5305	0.0206	0.2065	0.508	1.25	695	0	0	0	0	utr_Tb927.11.12000
Tb927.2.5970	hypothetical protein, conserved	ZUnknown	0.2399	0.0018	-0.0813	0.556	1.25	598	0	0	0	0	utr_Tb927.2.5970
Tb927.11.1970	hypothetical protein, conserved	ZUnknown	0.2564	0.0226	-0.0706	0.826	1.25	74	0	0	0	0	utr_Tb927.11.1970
Tb927.8.5050	OTU-like cysteine protease, putative	ZUnknown	-0.6237	2.08e-16	-0.9418	1.53e-31	1.25	1410	0	1	1	0	utr_Tb927.8.5050
Tb927.1.1060	Cell cycle checkpoint protein RAD1-like, putative	Cell.cycle	0.3159	0.0202	0.011	0.954	1.24	832	0	0	0	0	utr_Tb927.1.1060
Tb927.6.3850	chaperone DNAj, putative, J9	Chaperone	0.0095	0.96	-0.2983	0.0425	1.24	952	0	0	0	0	utr_Tb927.6.3850
Tb927.5.4260	histone H4	Chromatin	0.3474	0.39	0.0426	0.693	1.24	157	0	0	0	0	utr_Tb927.5.4260
Tb11.v5.1056	DNA polymerase kappa, putative	DNA	-0.8944	7.87e-06	-1.1999	2.65e-09	1.24	3449	0	1	1	0	utr_Tb11.v5.1056.1_2
Tb927.11.8500	DNA polymerase kappa, putative	DNA	-0.6552	4.74e-07	-0.9657	5.3e-07	1.24	449	0	1	1	0	utr_Tb927.11.8500.1_2
Tb927.7.7530	GRESAG 4, putative receptor-type adenylate cyclase	GRESAG	-0.6199	8.25e-26	-0.9274	1.56e-21	1.24	529	0	1	1	0	utr_Tb927.7.7530
Tb927.10.8900	choline/ethanolamine phosphotransferase (CEPT)	Lipids	-0.2343	0.000537	-0.547	3.66e-14	1.24	1711	0	0	0	0	utr_Tb927.10.8900
Tb927.11.6370	leucine-rich repeat protein (LRRP)	LRRP	-0.0947	0.209	-0.4072	0.00141	1.24	172	0	0	0	0	utr_Tb927.11.6370
Tb927.5.400	75 kDa invariant surface glycoprotein (ISG75)	Membrane.protein	0.2444	0.0804	-0.0654	0.599	1.24	3857	0	0	0	0	utr_Tb927.5.400
Tb927.9.1950	hypothetical protein, conserved	Mito.pathway	0.1278	0.198	-0.1838	0.625	1.24	12	0	0	0	0	utr_Tb927.9.1950
Tb927.8.3800	nucleoside phosphatase, putative,guanosine diphosphatase, putative	Nucleotides	-0.2898	0.000184	-0.5995	0.000232	1.24	225	0	1	1	0	utr_Tb927.8.3800
Tb927.7.6310	PLK polo-like protein kinase	Protein.kinase	0.2638	0.000407	-0.0515	0.748	1.24	1441	0	0	0	0	utr_Tb927.7.6310
Tb927.9.11030	PKAC2 protein kinase A catalytic subunit isoform 2	Protein.kinase	-0.1859	0.0153	-0.4906	7e-06	1.24	2568	0	0	0	0	utr_Tb927.9.11030
Tb927.9.2140	protein kinase, putative	Protein.kinase	0.2672	8.41e-05	-0.0446	0.738	1.24	941	0	0	0	0	utr_Tb927.9.2140
Tb927.5.790	CK1.1 casein kinase 1	Protein.kinase	0.279	0.000404	-0.0307	0.856	1.24	1811	0	0	0	0	utr_Tb927.5.790
Tb927.9.5860	tryparedoxin peroxidase	Redox	-0.3396	1.54e-07	-0.6475	1.36e-18	1.24	693	0	1	1	0	utr_Tb927.9.5860
Tb927.11.8470	ZC3H45	RNA.binding	0.7638	1.03e-12	0.4573	0.000103	1.24	5035	0	0	0	0	utr_Tb927.11.8470
Tb927.1.2600	PUF9	RNA.binding	-1.3879	2.96e-92	-1.6927	1.03e-49	1.24	2274	0	1	1	0	utr_Tb927.1.2600
Tb927.4.3490	2RPB6 DNA-directed RNA polymerase subunit, putative, (RPB6)	RNA.synthesis	-0.0339	0.828	-0.3416	0.0835	1.24	81	0	0	0	0	utr_Tb927.4.3490
Tb927.6.2970	pseudouridine synthase A-like protein, putative	rRNA.tRNA.process	-0.0366	0.79	-0.3525	0.243	1.24	93	0	0	0	0	utr_Tb927.6.2970
Tb927.6.3510	tRNA modification enzyme, putative	rRNA.tRNA.process	-0.6159	2.42e-10	-0.9224	2.89e-08	1.24	307	0	1	1	0	utr_Tb927.6.3510
Tb927.5.3560	vesicle-associated membrane protein, putative (VAMP)	Vesicular.transport	0.0708	0.48	-0.2411	0.0147	1.24	528	0	0	0	0	utr_Tb927.5.3560
Tb927.6.3640	zinc finger of C3HC4-type, RING/B-box zinc finger, putative	Zinc.finger	-0.448	3.37e-09	-0.7573	6.03e-10	1.24	1122	0	1	1	0	utr_Tb927.6.3640
Tb927.5.4110	hypothetical protein, conserved	ZUnknown	0.113	0.19	-0.2017	0.13	1.24	588	0	0	0	0	utr_Tb927.5.4110
Tb927.10.410	hypothetical protein, conserved	ZUnknown	0.2169	0.0422	-0.0976	0.624	1.24	918	0	0	0	0	utr_Tb927.10.410
Tb927.9.12440	hypothetical protein, conserved	ZUnknown	0.2677	0.0549	-0.0481	0.907	1.24	56	0	0	0	0	utr_Tb927.9.12440
Tb927.5.1600	hypothetical protein, conserved	ZUnknown	-0.1195	0.181	-0.4242	4.19e-06	1.24	942	0	0	0	0	utr_Tb927.5.1600
Tb927.6.830	hypothetical protein, conserved	ZUnknown	-0.0658	0.684	-0.3755	0.00122	1.24	1455	0	0	0	0	utr_Tb927.6.830
Tb927.3.3550	hypothetical protein, conserved	ZUnknown	0.0856	0.295	-0.2242	0.00712	1.24	1349	0	0	0	0	utr_Tb927.3.3550
Tb927.11.1690	Emopamil binding protein, putative	ZUnknown	-0.0899	0.475	-0.3965	0.0137	1.24	151	0	0	0	0	utr_Tb927.11.1690.1
Tb927.11.1690	Emopamil binding protein, putative	ZUnknown	-0.0899	0.475	-0.3965	0.0137	1.24	151	0	0	0	0	utr_Tb927.11.1690.2
Tb09.v4.0058	hypothetical protein	ZUnknown	0.7022	3.31e-09	0.3938	0.0145	1.24	678	0	0	0	0	utr_Tb09.v4.0058
Tb927.2.2910	hypothetical protein, conserved	ZUnknown	-0.0659	0.553	-0.3775	0.0249	1.24	393	0	0	0	0	utr_Tb927.2.2910
Tb927.2.2360	Ankyrin repeats (3 copies)/Zinc finger, C3HC4 type (RING finger), putative	ZUnknown	0.0347	0.739	-0.2771	0.0393	1.24	863	0	0	0	0	utr_Tb927.2.2360
Tb927.11.5080	hypothetical protein, conserved	ZUnknown	0.4827	1.77e-09	0.17	0.155	1.24	1583	0	0	0	0	utr_Tb927.11.5080
Tb927.8.1800	Eukaryotic membrane protein family, putative	ZUnknown	0.1119	0.297	-0.2	0.185	1.24	423	0	0	0	0	utr_Tb927.8.1800
Tb927.8.4230	hypothetical protein, conserved	ZUnknown	0.1772	0.0257	-0.1331	0.298	1.24	761	0	0	0	0	utr_Tb927.8.4230
Tb927.10.480	hypothetical protein, conserved, poly(Q), Kinetoplastid-specific	ZUnknown	0.6102	5.75e-09	0.3019	0.402	1.24	4202	0	0	0	0	utr_Tb927.10.480
Tb927.11.4140	hypothetical protein, conserved	ZUnknown	0.1865	0.141	-0.1194	0.587	1.24	158	0	0	0	0	utr_Tb927.11.4140
Tb927.11.10530	hypothetical protein, conserved	ZUnknown	0.3602	0.00913	0.0544	0.848	1.24	280	0	0	0	0	utr_Tb927.11.10530
Tb11.v5.0805	hypothetical protein, conserved	ZUnknown	0.2963	0.00914	-0.0129	0.903	1.24	8871	0	0	0	0	utr_Tb11.v5.0805.1_2
Tb927.8.4730	AAT5 Arginine transporter	Amino.acid.transport	1.1732	3.84e-28	0.8734	2.75e-14	1.23	1402	0	0	0	0	utr_Tb927.8.4730
Tb927.11.12610	CYC1, cyclin 1	Cell.cycle	0.2891	0.00569	-0.0072	0.973	1.23	196	0	0	0	0	utr_Tb927.11.12610
Tb927.6.1380	cyclophilin-type peptidyl-prolyl cis-trans isomerase, putative (PPIase)	Chaperone	0.0905	0.801	-0.2096	0.667	1.23	517	0	0	0	0	utr_Tb927.6.1380
Tb927.1.570	Histone-lysine N-methyltransferase, H3 lysine-76 specific (DOT1B)	Chromatin	-0.0359	0.768	-0.3316	0.0611	1.23	389	0	0	0	0	utr_Tb927.1.570
Tb927.5.4200	histone H4	Chromatin	0.3074	0.33	0.0032	0.981	1.23	178	0	0	0	0	utr_Tb927.5.4200
Tb927.8.4410	ARP2/3 complex subunit, putative	Cytoskeleton	0.4877	1.25e-06	0.1925	0.156	1.23	650	0	0	0	0	utr_Tb927.8.4410
Tb927.11.11440	A/G-specific adenine glycosylase, putative	DNA	0.1696	0.087	-0.133	0.677	1.23	88	0	0	0	0	utr_Tb927.11.11440
Tb927.7.1930	nucleoside diphosphatase, putative,ectonucleoside triphosphate diphosphohydrolase 5, putative	Enzyme	0.2807	0.017	-0.015	0.971	1.23	92	0	0	0	0	utr_Tb927.7.1930
Tb927.5.930	NADH-dependent fumarate reductase (FRDg)	Glucose.glycerol	0.1054	0.205	-0.1915	0.187	1.23	1334	0	0	0	0	utr_Tb927.5.930
Tb11.v5.0649	serine palmitoyltransferase, putative	Lipids	0.1755	0.0496	-0.1254	0.0838	1.23	3944	0	0	0	0	utr_Tb11.v5.0649.1_1
Tb927.11.9150	hypothetical protein, conserved	Mito.DNA	-0.2818	3.74e-05	-0.577	2.57e-05	1.23	219	0	0	0	0	utr_Tb927.11.9150
Tb927.6.2790	L-threonine 3-dehydrogenase, putative	Mito.pathway	-0.1921	0.00361	-0.4917	1.35e-11	1.23	848	0	0	0	0	utr_Tb927.6.2790
Tb927.7.4570	inosine-guanine nucleoside hydrolase (IG-NH)	Nucleotides	-1.3302	3.67e-52	-1.6248	0.000235	1.23	0	0	1	1	0	utr_Tb927.7.4570
Tb927.10.1050	serine peptidase, Clan SC, Family S10 (CBP1)	Protease	0.3487	2.04e-05	0.0496	0.725	1.23	461	0	0	0	0	utr_Tb927.10.1050
Tb927.3.5400	RIO1 protein kinase	Protein.kinase	-0.0771	0.478	-0.3741	0.063	1.23	249	0	0	0	0	utr_Tb927.3.5400
Tb927.10.14420	NEK16 protein kinase	Protein.kinase	0.1839	0.00684	-0.1181	0.185	1.23	1724	0	0	0	0	utr_Tb927.10.14420
Tb927.10.7340	40S ribosomal protein S24E	Ribosome	-0.063	0.474	-0.3621	0.000327	1.23	66	0	0	0	0	utr_Tb927.10.7340
Tb927.5.1570	ZC3H12	RNA.binding	-0.0705	0.591	-0.3665	3.18e-07	1.23	2713	0	0	0	0	utr_Tb927.5.1570
Tb927.11.12670	TYW3 homologue, phe-tRNA modification, reading frame maintenance	Translation	0.2226	0.0616	-0.0768	0.828	1.23	52	0	0	0	0	utr_Tb927.11.12670
Tb927.9.12930	selenocysteine lyase	Translation	0.284	0.000797	-0.0157	0.938	1.23	215	0	0	0	0	utr_Tb927.9.12930
Tb927.5.1490	eIF4G1	Translation	-0.0111	0.923	-0.3058	0.00137	1.23	649	0	0	0	0	utr_Tb927.5.1490
Tb927.7.5960	protein associated with differentiation 4, PAD4	Transporter	-0.7968	8.9e-27	-1.0944	1.87e-05	1.23	37	0	1	1	0	utr_Tb927.7.5960
Tb927.8.890	Ras-related protein Rab1A	Vesicular.transport	-0.3967	7.14e-09	-0.6947	1.78e-10	1.23	1347	0	1	1	0	utr_Tb927.8.890
Tb927.5.3770	hypothetical protein, conserved	ZUnknown	1.9523	5.69e-93	1.6546	1.68e-16	1.23	441	0	0	0	0	utr_Tb927.5.3770
Tb927.9.12000	LEM3 (ligand-effect modulator 3) family / CDC50 family, putative	ZUnknown	-0.0917	0.331	-0.395	0.000276	1.23	1025	0	0	0	0	utr_Tb927.9.12000
Tb927.9.7580	hypothetical protein, conserved	ZUnknown	-0.3738	2.23e-06	-0.6781	0.0947	1.23	143	0	0	0	0	utr_Tb927.9.7580
Tb927.11.7870	hypothetical protein, conserved	ZUnknown	0.0727	0.431	-0.226	0.212	1.23	302	0	0	0	0	utr_Tb927.11.7870
Tb927.9.9720	glucosidase II beta subunit-like protein, putative	ZUnknown	0.1212	0.319	-0.1826	0.368	1.23	129	0	0	0	0	utr_Tb927.9.9720
Tb927.10.8330	S. cerevisiae PSP1 homologue, putative	ZUnknown	-0.0538	0.744	-0.3516	0.411	1.23	8	0	0	0	0	utr_Tb927.10.8330
Tb927.10.11570	hypothetical protein, conserved	ZUnknown	0.1906	0.0186	-0.1075	0.634	1.23	101	0	0	0	0	utr_Tb927.10.11570
Tb927.10.3050	hypothetical protein	ZUnknown	0.2807	0.455	-0.016	0.945	1.23	1231	0	0	0	0	utr_Tb927.10.3050
Tb927.10.15040	hypothetical protein, conserved	ZUnknown	0.2298	0.00496	-0.0652	0.652	1.23	3899	0	0	0	0	utr_Tb927.10.15040
Tb927.10.9530	hypothetical protein	ZUnknown	0.3167	0.893	0.0189	0.932	1.23	0	0	0	0	0	utr_Tb927.10.9530
Tb09.v4.0064	hypothetical protein	ZUnknown	-0.6017	0.0225	-0.8974	1.3e-06	1.23	1098	0	1	1	0	utr_Tb09.v4.0064
Tb927.8.6590	Outer mitochondrial membrane transport complex protein/Glutathione S-transferase, C-terminal domain containing protein, putative	ZUnknown	-0.4511	1.24e-07	-0.7467	1.61e-15	1.23	1204	0	1	1	0	utr_Tb927.8.6590
Tb927.7.2180	T. brucei spp.-specific protein, putative	ZUnknown	-0.2993	0.0295	-0.5949	0.000374	1.23	463	0	1	1	0	utr_Tb927.7.2180.1_1
Tb927.7.2180	T. brucei spp.-specific protein, putative	ZUnknown	-0.2993	0.0295	-0.5949	0.000374	1.23	463	0	1	1	0	utr_Tb927.7.2180.2_1
Tb927.5.1780	hypothetical protein, conserved	ZUnknown	-0.3816	1.2e-05	-0.6746	1.95e-19	1.23	935	0	1	1	0	utr_Tb927.5.1780
Tb927.10.640	arginine N-methyltransferase, type II (PRMT5)	Arg.methylation	0.0962	0.226	-0.1849	0.163	1.22	397	0	0	0	0	utr_Tb927.10.640
Tb927.7.990	chaperone DNAj, putative, J31	Chaperone	-0.1878	0.0164	-0.4801	0.00101	1.22	262	0	0	0	0	utr_Tb927.7.990
Tb927.7.4110	Kinesin-like but poor match	Cytoskeleton	0.0402	0.68	-0.2412	0.392	1.22	2101	0	0	0	0	utr_Tb927.7.4110
Tb927.1.1350	kinesin heavy chain, Kinesin-1	Cytoskeleton	0.3465	3.01e-07	0.0622	0.661	1.22	1430	0	0	0	0	utr_Tb927.1.1350
Tb927.4.4040	hypothetical protein, conserved	Cytoskeleton	-0.4847	1.53e-13	-0.7711	1.54e-19	1.22	755	0	1	1	0	utr_Tb927.4.4040
Tb11.v5.0254	pantothenate kinase subunit, putative	Enzyme	-0.4898	2.07e-17	-0.7787	7.3e-19	1.22	1288	0	1	1	0	utr_Tb11.v5.0254.1_1
Tb11.v5.0654	receptor-type adenylate cyclase, putative	ESAG	0.4357	0.00262	0.1447	0.173	1.22	1802	0	0	0	0	utr_Tb11.v5.0654.1_1
Tb927.1.370	leucine-rich repeat protein (LRRP)	LRRP	-0.4554	7.53e-08	-0.7407	1.02e-10	1.22	1890	0	1	1	0	utr_Tb927.1.370.1
Tb927.1.370	leucine-rich repeat protein (LRRP)	LRRP	-0.4554	7.53e-08	-0.7407	1.02e-10	1.22	1890	0	1	1	0	utr_Tb927.1.370.2
Tb927.11.11800	DNA repair and recombination helicase protein PIF3	Mito.DNA	0.4945	3.26e-12	0.2109	0.127	1.22	529	0	0	0	0	utr_Tb927.11.11800
Tb927.11.2750	POMP12	Mito.membrane	0.2806	0.000456	-0.0041	0.984	1.22	600	0	0	0	0	utr_Tb927.11.2750
Tb927.8.4930	hypothetical protein, conserved	Mito.pathway	0.1515	0.11	-0.1296	0.39	1.22	177	0	0	0	0	utr_Tb927.8.4930
Tb927.10.1390	hypoxanthine-guanine phosphoribosyltransferase, putative	Nucleotides	-0.8916	1.22e-25	-1.1782	4e-32	1.22	343	0	1	1	0	utr_Tb927.10.1390
Tb927.7.6270	peptidase t, putative	Protease	0.7252	1.25e-18	0.4387	0.000395	1.22	409	0	0	0	0	utr_Tb927.7.6270
Tb927.5.1730	inhibitor of serine peptidase (ISP), putative,ecotin family (I11), putative	Protease	0.0145	0.916	-0.2749	0.00445	1.22	191	0	0	0	0	utr_Tb927.5.1730
Tb927.7.190	thimet oligopeptidase, putative (THOP1)	Protease	0.1157	0.125	-0.1709	0.186	1.22	235	0	0	0	0	utr_Tb927.7.190
Tb927.10.460	NRKC NIMA-related protein kinase	Protein.kinase	-0.0194	0.854	-0.305	0.00544	1.22	1099	0	0	0	0	utr_Tb927.10.460
Tb927.3.2150	protein phosphatase 2C, putative	Protein.phosphatase	0.5049	2.14e-07	0.2178	0.156	1.22	340	0	0	0	0	utr_Tb927.3.2150
Tb927.9.7770	spermidine synthase (SpSyn)	Redox	-1.3825	2.03e-82	-1.6749	1.1e-36	1.22	158	0	1	1	0	utr_Tb927.9.7770
Tb927.7.240	40S ribosomal protein S33	Ribosome	-0.0089	0.953	-0.2986	0.0518	1.22	60	0	0	0	0	utr_Tb927.7.240
Tb927.9.8740	DRBD3 (PTB1)	RNA.binding	-0.2366	0.000562	-0.5177	8.62e-08	1.22	2147	0	0	0	0	utr_Tb927.9.8740
Tb927.5.3450	eukaryotic translation initiation factor eIF2A, putative	Translation	-0.1088	0.216	-0.4012	0.0235	1.22	163	0	0	0	0	utr_Tb927.5.3450
Tb927.9.11050	4E-IP, 4EIP, 4E-interacting protein, putative	Translation	0.0806	0.388	-0.212	0.0304	1.22	2950	0	0	0	0	utr_Tb927.9.11050
Tb927.6.2060	histidyl-tRNA synthetase	Translation.tRNA	0.134	0.182	-0.1532	0.454	1.22	180	0	0	0	0	utr_Tb927.6.2060
Tb927.5.2400	ubiquitin carboxyl-terminal hydrolase, Clan CA cysteine peptidase, family C12, putative	Ubiquitin.proteasome	-0.2168	0.000814	-0.5011	4.55e-06	1.22	2030	0	0	0	0	utr_Tb927.5.2400
Tb11.v5.0675	ubiquitin-activating enzyme E1, putative	Ubiquitin.proteasome	-0.0828	0.338	-0.3669	0.081	1.22	492	0	0	0	0	utr_Tb11.v5.0675.1_2
Tb927.6.3040	small GTP-binding protein Rab28, putative	Vesicular.transport	0.0794	0.468	-0.2065	0.0936	1.22	480	0	0	0	0	utr_Tb927.6.3040
Tb927.1.1560	vesicular-fusion protein nsf, putative,N-ethylmaleimide sensitive factor (NsF)	Vesicular.transport	-0.5039	1.01e-09	-0.7942	4.37e-15	1.22	1766	0	1	1	0	utr_Tb927.1.1560
Tb927.10.2610	Domain of unknown function (DUF1935), putative	ZUnknown	0.5172	2.3e-11	0.2293	0.00606	1.22	1230	0	0	0	0	utr_Tb927.10.2610
Tb927.5.1860	hypothetical protein, conserved	ZUnknown	-0.2567	0.00481	-0.5413	0.0295	1.22	92	0	0	0	0	utr_Tb927.5.1860
Tb927.9.12160	hypothetical protein, conserved	ZUnknown	0.0695	0.433	-0.2188	0.108	1.22	242	0	0	0	0	utr_Tb927.9.12160
Tb927.10.8370	hypothetical protein, conserved	ZUnknown	-0.2603	0.0435	-0.5498	0.128	1.22	68	0	0	0	0	utr_Tb927.10.8370
Tb927.7.5780	thioredoxin, putative	ZUnknown	0.0334	0.88	-0.2556	0.216	1.22	800	0	0	0	0	utr_Tb927.7.5780
Tb927.1.1400	Overproducer of inositol protein 10 homolog, putative	ZUnknown	0.0265	0.91	-0.2568	0.535	1.22	5	0	0	0	0	utr_Tb927.1.1400
Tb927.9.1530	hypothetical protein, conserved	ZUnknown	0.3912	7.77e-08	0.1073	0.64	1.22	36	0	0	0	0	utr_Tb927.9.1530
Tb927.4.1970	Domain of unknown function DUF21, putative	ZUnknown	0.2049	0.0091	-0.0837	0.657	1.22	220	0	0	0	0	utr_Tb927.4.1970
Tb927.5.4510	hypothetical protein, conserved	ZUnknown	0.4515	0.00443	0.1648	0.723	1.22	28	0	0	0	0	utr_Tb927.5.4510
Tb927.4.2120	hypothetical protein, conserved	ZUnknown	0.2019	0.0377	-0.0854	0.823	1.22	59	0	0	0	0	utr_Tb927.4.2120
Tb927.8.4850	hypothetical protein, conserved	ZUnknown	0.2371	0.0246	-0.0552	0.838	1.22	95	0	0	0	0	utr_Tb927.8.4850
Tb927.11.1850	hypothetical protein, conserved	ZUnknown	0.317	0.0131	0.036	0.898	1.22	321	0	0	0	0	utr_Tb927.11.1850
Tb927.8.2190	hypothetical protein, conserved	ZUnknown	0.336	0.00761	0.0463	0.931	1.22	39	0	0	0	0	utr_Tb927.8.2190
Tb927.8.7970	hypothetical protein, brucei-evansi-specific	ZUnknown	-0.9763	1.17e-34	-1.2622	5.36e-41	1.22	755	0	1	1	0	utr_Tb927.8.7970
Tb927.2.3090	hypothetical protein, conserved	ZUnknown	-0.6243	9.43e-06	-0.9075	0.000121	1.22	2327	0	1	1	0	utr_Tb927.2.3090
Tb927.10.3400	hypothetical protein, conserved	ZUnknown	-0.4199	5.29e-09	-0.7112	3.55e-10	1.22	898	0	1	1	0	utr_Tb927.10.3400
Tb927.4.4000	amino acid transporter, putative	Amino.acid.transport	0.2943	0.0479	0.0236	0.911	1.21	1238	0	0	0	0	utr_Tb927.4.4000
Tb927.10.2290	chaperone protein DNAj, endoplasmatic reticulum J3	Chaperone	-0.0852	0.443	-0.3597	0.00233	1.21	721	0	0	0	0	utr_Tb927.10.2290
Tb927.5.4180	histone H4	Chromatin	0.2727	0.0088	-0.0077	0.954	1.21	178	0	0	0	0	utr_Tb927.5.4180
Tb927.10.720	FAX24 or CAP118 Clathrin-associated protein	Cytoskeleton	-0.1955	0.018	-0.4721	1.2e-05	1.21	747	0	0	0	0	utr_Tb927.10.720
Tb11.v5.0558	oligosaccharyl transferase subunit, putative	Glycans	0.3574	1.14e-06	0.0785	0.525	1.21	568	0	0	0	0	utr_Tb11.v5.0558.1_1
Tb927.9.12700	phospholipase A1, putative flippase	Lipids	0.6407	2.82e-23	0.3646	0.00027	1.21	1314	0	0	0	0	utr_Tb927.9.12700
Tb05.5K5.170	elongation of very long chain fatty acids protein, ATP pyrophosphate-lyase, putative	Lipids	-0.4612	4.85e-06	-0.7364	0.0675	1.21	100	0	0	0	0	utr_Tb05.5K5.170
Tb927.10.4050	serine palmitoyltransferase, putative	Lipids	0.1322	0.102	-0.1418	0.248	1.21	2270	0	0	0	0	utr_Tb927.10.4050
Tb927.3.5630	3,2-trans-enoyl-CoA isomerase, mitochondrial precursor, putative	Lipids	0.0539	0.68	-0.2223	0.33	1.21	26	0	0	0	0	utr_Tb927.3.5630
Tb927.5.440	trans-sialidase, putative	Membrane.protein	0.6161	1.89e-10	0.3388	0.169	1.21	352	0	0	0	0	utr_Tb927.5.440
Tb927.9.15640	BARP protein	Membrane.protein	0.2722	0.0133	0.0004	0.999	1.21	472	0	0	0	0	utr_Tb927.9.15640
Tb927.5.1060	Complex III beta-MMP subunit of cytochrom b/c1 complex	Mito.e.transport	0.3723	3.37e-05	0.0966	0.401	1.21	1150	0	0	0	0	utr_Tb927.5.1060
Tb927.4.4160	REMC5 mitochondrial RNA binding protein MRB4160 MRB complex component	Mito.RNA	-0.4481	5.68e-09	-0.7193	6.67e-09	1.21	425	0	1	1	0	utr_Tb927.4.4160
Tb927.6.2480	chaperone protein DNAj, associated with Mitchondrial LSU ribosome	Mito.translation	0.0267	0.82	-0.2471	0.451	1.21	100	0	0	0	0	utr_Tb927.6.2480
Tb927.6.1970	CBP20 nuclear cap binding protein	Nuclear.transport	-0.008	0.959	-0.285	0.155	1.21	146	0	0	0	0	utr_Tb927.6.1970
Tb11.v5.0245	protein kinase, putative	Protein.kinase	0.2233	0.0133	-0.0556	0.676	1.21	1631	0	0	0	0	utr_Tb11.v5.0245.1_1
Tb927.9.6560	protein kinase, putative	Protein.kinase	0.0777	0.306	-0.1981	0.0322	1.21	531	0	0	0	0	utr_Tb927.9.6560
Tb927.5.280	retrotransposon hot spot protein (RHS3, pseudogene), putative	RHS	-0.2359	0.705	-0.5105	0.00186	1.21	3501	0	0	0	0	utr_Tb927.5.280
Tb927.7.2140	ZC3H18	RNA.binding	-1.01	1.3e-38	-1.2886	1.95e-08	1.21	2935	0	1	1	0	utr_Tb927.7.2140
Tb07.11L3.90	ZC3H18	RNA.binding	-1.0305	2.14e-39	-1.3011	2.96e-28	1.21	2935	0	1	1	0	utr_Tb07.11L3.90
Tb927.10.11230	conserved, found in PRP19 pull-down	RNA.processing	0.1724	0.297	-0.0993	0.849	1.21	68	0	0	0	0	utr_Tb927.10.11230
Tb927.7.1510	pseudouridylate synthase I, putative	rRNA.tRNA.process	0.1432	0.13	-0.1363	0.61	1.21	129	0	0	0	0	utr_Tb927.7.1510
Tb927.11.12860	CARP2	Signalling	-0.012	0.929	-0.2837	0.00624	1.21	585	0	0	0	0	utr_Tb927.11.12860.1_1
Tb927.11.12860	CARP2	Signalling	-0.012	0.929	-0.2837	0.00624	1.21	585	0	0	0	0	utr_Tb927.11.12860.2_1
Tb927.11.13250	eIF-2-gamma	Translation	-0.1056	0.122	-0.3749	1.06e-06	1.21	694	0	0	0	0	utr_Tb927.11.13250
Tb927.11.13190	EF1 gamma, elongation factor 1 gamma, putative	Translation	-0.755	9.52e-29	-1.0289	1.34e-45	1.21	222	0	1	1	0	utr_Tb927.11.13190
Tb927.1.2880	pteridine transporter, putative	Transporter	0.9465	1.21e-26	0.6758	8.41e-08	1.21	576	0	0	0	0	utr_Tb927.1.2880
Tb927.2.1890	E2-like ubiquitin-conjugation enzyme (ATG3)	Ubiquitin.proteasome	0.0973	0.401	-0.1765	0.212	1.21	912	0	0	0	0	utr_Tb927.2.1890
Tb927.8.4620	small GTP-binding protein Rab7, putative	Vesicular.transport	0.0011	0.994	-0.2722	0.153	1.21	141	0	0	0	0	utr_Tb927.8.4620
Tb927.6.3330	hypothetical protein, conserved	ZUnknown	0.2264	0.0254	-0.0525	0.834	1.21	88	0	0	0	0	utr_Tb927.6.3330
Tb927.9.8500	hypothetical protein	ZUnknown	0.3144	0.00102	0.0336	0.884	1.21	252	0	0	0	0	utr_Tb927.9.8500
Tb927.6.4240	hypothetical protein, conserved	ZUnknown	-0.189	0.19	-0.4653	0.000664	1.21	197	0	0	0	0	utr_Tb927.6.4240.1
Tb927.6.4240	hypothetical protein, conserved	ZUnknown	-0.189	0.19	-0.4653	0.000664	1.21	197	0	0	0	0	utr_Tb927.6.4240.2
Tb927.7.7510	hypothetical protein	ZUnknown	-0.0753	0.458	-0.3492	0.00514	1.21	227	0	0	0	0	utr_Tb927.7.7510.1
Tb927.7.7510	hypothetical protein	ZUnknown	-0.0753	0.458	-0.3492	0.00514	1.21	227	0	0	0	0	utr_Tb927.7.7510.2
Tb927.9.10690	Protein of unknown function (DUF2009), putative	ZUnknown	-0.1088	0.232	-0.3784	0.00827	1.21	351	0	0	0	0	utr_Tb927.9.10690
Tb927.1.3890	hypothetical protein	ZUnknown	0.0588	0.72	-0.2158	0.0536	1.21	447	0	0	0	0	utr_Tb927.1.3890
Tb927.5.3900	Galactose oxidase, central domain/Domain of unknown function (DUF4110), putative	ZUnknown	-0.0464	0.669	-0.3237	0.0571	1.21	261	0	0	0	0	utr_Tb927.5.3900
Tb927.3.4830	hypothetical protein	ZUnknown	0.4223	0.000131	0.1478	0.213	1.21	1656	0	0	0	0	utr_Tb927.3.4830
Tb927.3.1150	Conserved hypothetical ATP binding protein, putative	ZUnknown	0.0021	0.988	-0.2693	0.318	1.21	3	0	0	0	0	utr_Tb927.3.1150
Tb927.7.6780	hypothetical protein	ZUnknown	0.3631	0.00767	0.0911	0.463	1.21	2154	0	0	0	0	utr_Tb927.7.6780
Tb927.10.3730	SET domain containing protein, putative	ZUnknown	0.1885	0.0247	-0.0864	0.762	1.21	261	0	0	0	0	utr_Tb927.10.3730
Tb927.8.3480	hypothetical protein, conserved	ZUnknown	-1.0018	9.07e-34	-1.2827	1.76e-06	1.21	34	0	1	1	0	utr_Tb927.8.3480
Tb927.8.4720	AAT5 Arginine transporter	Amino.acid.transport	1.1177	7.17e-29	0.8521	6.63e-14	1.2	1392	0	0	0	0	utr_Tb927.8.4720
Tb927.7.6940	glutaminyl cyclase, putative	Amino.acids	-0.2459	0.00335	-0.5123	7.3e-05	1.2	472	0	0	0	0	utr_Tb927.7.6940
Tb927.8.8350	mitotic centromere-associated kinesin (MCAK), putative	Cell.cycle	-0.7211	3.48e-19	-0.9786	1.37e-14	1.2	365	0	1	1	0	utr_Tb927.8.8350
Tb927.8.1010	chaperone DNAj, putative, J30	Chaperone	0.15	0.198	-0.1175	0.544	1.2	352	0	0	0	0	utr_Tb927.8.1010
Tb927.9.14420	cyclophilin type peptidyl-prolyl cis-trans isomerase, putative (PPIase)	Chaperone	0.2475	0.00929	-0.0196	0.927	1.2	231	0	0	0	0	utr_Tb927.9.14420
Tb927.10.8820	SMEE1 hook complex protein	Cytoskeleton	-0.0236	0.814	-0.2921	0.00112	1.2	964	0	0	0	0	utr_Tb927.10.8820
Tb927.3.3090	helicase, putative	DNA	0.0399	0.657	-0.2172	0.181	1.2	153	0	0	0	0	utr_Tb927.3.3090
Tb927.4.1200	ESAG1, putative	ESAG	0.3326	0.0178	0.0726	0.864	1.2	120	0	0	0	0	utr_Tb927.4.1200
Tb927.4.2290	glucose transporter, putative	Glucose.glycerol	0.3696	2.5e-07	0.1091	0.627	1.2	121	0	0	0	0	utr_Tb927.4.2290
Tb927.11.7380	glycerol-3-phosphate dehydrogenase (FAD-dependent), mitochondrial, TAO complex	Glucose.glycerol	-1.14	4.88e-73	-1.4014	4.3e-63	1.2	1368	0	1	1	0	utr_Tb927.11.7380
Tb927.8.2930	mannosyl-oligosaccharide 1,2-alpha-mannosidase IB, ER quality control	Glycans	0.1884	0.0143	-0.0791	0.854	1.2	59	0	0	0	0	utr_Tb927.8.2930
Tb927.7.3760	phosphatidylserine synthase, putative	Lipids	-0.5685	6.35e-18	-0.8285	1.65e-25	1.2	1187	0	1	1	0	utr_Tb927.7.3760
Tb927.9.15560	BARP protein	Membrane.protein	0.4648	0.012	0.1962	0.571	1.2	483	0	0	0	0	utr_Tb927.9.15560
Tb927.11.3750	NADH-cytochrome b5 reductase, putative (B5R)	Mito.e.transport	0.3285	0.000657	0.0624	0.7	1.2	626	0	0	0	0	utr_Tb927.11.3750
Tb927.10.6170	hypothetical protein, conserved	Mito.pathway	0.0368	0.685	-0.222	0.265	1.2	114	0	0	0	0	utr_Tb927.10.6170
Tb927.10.12260	Zn-dependent peptidase (M20/M25/M40 family)	Protease	0.8814	2.36e-39	0.6231	2.16e-10	1.2	472	0	0	0	0	utr_Tb927.10.12260
Tb927.11.14730	Metalloprotease M41 FtsH, putative	Protease	0.2566	0.000152	-0.0028	0.986	1.2	620	0	0	0	0	utr_Tb927.11.14730
Tb927.1.2150	calpain-like protein fragment, putative,calpain-like cysteine peptidase, Clan CA, family C2	Protease	-0.6162	0.000311	-0.8814	4.97e-08	1.2	1797	0	1	1	0	utr_Tb927.1.2150
Tb927.11.14070	RDK1 protein kinase	Protein.kinase	0.141	0.0329	-0.1252	0.298	1.2	1093	0	0	0	0	utr_Tb927.11.14070
Tb11.02.5050b	protein kinase, putative	Protein.kinase	0.1776	0.0393	-0.0892	0.421	1.2	6806	0	0	0	0	utr_Tb11.02.5050b.1_1
Tb927.8.3770	MAPK protein kinase	Protein.kinase	0.2344	0.000363	-0.0315	0.814	1.2	2074	0	0	0	0	utr_Tb927.8.3770
Tb927.10.12330	ZC3H34	RNA.binding	-0.2716	0.00211	-0.5389	2.29e-07	1.2	159	0	0	0	0	utr_Tb927.10.12330
Tb927.10.11270	RBP23	RNA.binding	-0.3898	0.00517	-0.651	0.00765	1.2	149	0	1	1	0	utr_Tb927.10.11270
Tb927.3.3590	U3 small nucleolar ribonucleoprotein protein MPP10, putative	rRNA.tRNA.process	-0.2204	0.0346	-0.4815	0.000496	1.2	507	0	0	0	0	utr_Tb927.3.3590
Tb927.11.9310	tRNA pseudouridine synthase, putative	rRNA.tRNA.process	-0.3083	6.13e-05	-0.5705	0.121	1.2	42	0	0	0	0	utr_Tb927.11.9310
Tb927.10.8290	eIF3c	Translation	-0.2425	0.00095	-0.4998	0.103	1.2	89	0	0	0	0	utr_Tb927.10.8290
Tb927.10.2070	hypothetical protein, conserved	ZUnknown	0.7186	4.63e-08	0.4559	0.000307	1.2	578	0	0	0	0	utr_Tb927.10.2070
Tb927.3.5190	hypothetical protein, conserved	ZUnknown	0.6038	3.46e-12	0.342	0.00651	1.2	1049	0	0	0	0	utr_Tb927.3.5190
Tb927.8.5350	hypothetical protein, conserved	ZUnknown	-0.1748	0.503	-0.4432	0.0111	1.2	1308	0	0	0	0	utr_Tb927.8.5350
Tb927.4.4090	hypothetical protein, conserved	ZUnknown	-0.266	0.0129	-0.5306	0.0115	1.2	94	0	0	0	0	utr_Tb927.4.4090
Tb927.10.1240	hypothetical protein, conserved	ZUnknown	-0.1374	0.251	-0.3991	0.014	1.2	225	0	0	0	0	utr_Tb927.10.1240
Tb11.v5.0292	hypothetical protein, conserved	ZUnknown	-0.0363	0.811	-0.3007	0.0248	1.2	791	0	0	0	0	utr_Tb11.v5.0292.1_2
Tb11.v5.0550	hypothetical protein, conserved	ZUnknown	-0.0366	0.763	-0.3017	0.0431	1.2	582	0	0	0	0	utr_Tb11.v5.0550.1_1
Tb927.10.5520	AmmeMemoRadiSam system protein B, putative	ZUnknown	0.4259	2.35e-09	0.1655	0.0926	1.2	742	0	0	0	0	utr_Tb927.10.5520
Tb927.8.6990	hypothetical protein, conserved	ZUnknown	0.4016	0.0425	0.1337	0.144	1.2	2513	0	0	0	0	utr_Tb927.8.6990
Tb927.10.6590	hypothetical protein, conserved	ZUnknown	0.0906	0.34	-0.1768	0.186	1.2	1021	0	0	0	0	utr_Tb927.10.6590
Tb927.7.2380	hypothetical protein, conserved	ZUnknown	0.0684	0.754	-0.192	0.198	1.2	478	0	0	0	0	utr_Tb927.7.2380
Tb927.3.4410	pre-RNA processing PIH1/Nop17, putative	ZUnknown	0.0449	0.751	-0.222	0.283	1.2	34	0	0	0	0	utr_Tb927.3.4410
Tb927.7.2800	Prp18 domain containing protein, putative	ZUnknown	-0.0438	0.666	-0.3071	0.285	1.2	57	0	0	0	0	utr_Tb927.7.2800
Tb927.5.2730	hypothetical protein, conserved	ZUnknown	0.113	0.482	-0.1496	0.32	1.2	727	0	0	0	0	utr_Tb927.5.2730
Tb927.6.3070	hypothetical protein, conserved	ZUnknown	0.1483	0.0827	-0.1145	0.355	1.2	764	0	0	0	0	utr_Tb927.6.3070
Tb927.9.2730	hypothetical protein, conserved	ZUnknown	0.1753	0.0136	-0.0894	0.383	1.2	1290	0	0	0	0	utr_Tb927.9.2730
Tb927.10.14220	hypothetical protein, conserved	ZUnknown	0.1229	0.21	-0.1456	0.511	1.2	130	0	0	0	0	utr_Tb927.10.14220
Tb927.11.7200	GRIP domain containing protein, putative	ZUnknown	0.1619	0.046	-0.1068	0.606	1.2	77	0	0	0	0	utr_Tb927.11.7200
Tb927.9.8490	hypothetical protein, conserved	ZUnknown	0.255	0.0187	-0.0095	0.949	1.2	578	0	0	0	0	utr_Tb927.9.8490
Tb11.v5.0445	hypothetical protein, conserved	ZUnknown	-0.1163	0.926	-0.3744	0.00782	1.2	4506	0	0	0	0	utr_Tb11.v5.0445.1_1
Tb927.11.2590	hypothetical protein, conserved, no known domains	ZUnknown	-0.0246	0.788	-0.2841	0.0168	1.2	805	0	0	0	0	utr_Tb927.11.2590
Tb927.3.510	hypothetical protein, conserved	ZUnknown	-0.4122	0.367	-0.6704	0.119	1.2	1051	0	0	0	0	utr_Tb927.3.510
Tb927.11.1060	Vasohibin, putative	ZUnknown	0.1233	0.147	-0.1348	0.162	1.2	930	0	0	0	0	utr_Tb927.11.1060
Tb10.v4.0044	hypothetical protein, conserved	ZUnknown	0.1067	0.487	-0.153	0.736	1.2	82	0	0	0	0	utr_Tb10.v4.0044
Tb927.9.5700	hypothetical protein, conserved	ZUnknown	0.1876	0.0072	-0.072	0.737	1.2	429	0	0	0	0	utr_Tb927.9.5700
Tb927.10.440	hypothetical protein, conserved	ZUnknown	0.311	0.0219	0.0527	0.791	1.2	573	0	0	0	0	utr_Tb927.10.440
Tb927.8.7960	hypothetical protein	ZUnknown	-1.1566	2.15e-37	-1.4174	7.08e-38	1.2	1538	0	1	1	0	utr_Tb927.8.7960
Tb927.7.2160	hypothetical protein, conserved, no domains, no yeast or human match	ZUnknown	-0.5267	2.07e-06	-0.7844	1e-12	1.2	1646	0	1	1	0	utr_Tb927.7.2160
Tb927.5.2640	cytidylyltransferase, putative	ZUnknown	-0.3343	0.00137	-0.5926	0.00203	1.2	186	0	1	1	0	utr_Tb927.5.2640
Tb11.v5.0387	cell-division control protein 2 homolog 6, putative	Cell.cycle	-0.1146	0.33	-0.3622	0.0012	1.19	1001	0	0	0	0	utr_Tb11.v5.0387.1_2
Tb927.5.4240	histone H4	Chromatin	0.3023	0.0425	0.0568	0.617	1.19	157	0	0	0	0	utr_Tb927.5.4240
Tb927.7.2790	CMF10, possible component of motile flagella	Cytoskeleton	-0.0519	0.557	-0.2997	0.0487	1.19	243	0	0	0	0	utr_Tb927.7.2790
Tb927.11.4740	paraflagellar rod protein PFC12	Cytoskeleton	0.1288	0.148	-0.1162	0.357	1.19	762	0	0	0	0	utr_Tb927.11.4740
Tb927.11.3705	DNA-directed RNA polymerases I, II, and III subunit RPABC5, putative	DNA	0.2938	0.012	0.0452	0.71	1.19	404	0	0	0	0	utr_Tb927.11.3705
Tb927.8.5600	transaldolase, putative	Glucose.glycerol	0.1286	0.0898	-0.1217	0.181	1.19	986	0	0	0	0	utr_Tb927.8.5600
Tb927.10.1230	ESP23 enriched in surface proteome	Membrane.protein	0.0031	0.975	-0.2466	0.23	1.19	14	0	0	0	0	utr_Tb927.10.1230
Tb927.5.1470	NADH-cytochrome b5 reductase, putative (B5R)	Mito.e.transport	0.3826	2.85e-06	0.136	0.156	1.19	1038	0	0	0	0	utr_Tb927.5.1470
Tb927.7.3510	LSU ribosomal protein, mitochondrial, putative	Mito.translation	0.3387	0.000777	0.0828	0.77	1.19	135	0	0	0	0	utr_Tb927.7.3510
Tb927.11.1020	ribokinase, putative	PPP	-0.0876	0.292	-0.3408	0.000471	1.19	998	0	0	0	0	utr_Tb927.11.1020
Tb927.10.8420	TOR1 protein kinase	Protein.kinase	0.1018	0.123	-0.1543	0.27	1.19	538	0	0	0	0	utr_Tb927.10.8420
Tb927.1.4050	ser/thr protein phosphatase with EF-Hand domains (PPEF)	Protein.phosphatase	-0.2362	0.000174	-0.493	2.51e-09	1.19	2358	0	0	0	0	utr_Tb927.1.4050
Tb927.11.3070	RRB1 homologue, involved in early stages of ribosome biogenesis.	rRNA.tRNA.process	-0.3838	3.04e-07	-0.6344	0.00033	1.19	53	0	1	1	0	utr_Tb927.11.3070
Tb927.9.5210	glutaminyl-tRNA synthetase, putative (28G16.175)	Translation.tRNA	-0.0845	0.238	-0.3302	0.0364	1.19	86	0	0	0	0	utr_Tb927.9.5210
Tb927.1.4420	ABC transporter, putative	Transporter	0.4672	1.03e-10	0.2198	0.046	1.19	1063	0	0	0	0	utr_Tb927.1.4420
Tb927.8.2860	hypothetical protein, conserved, t-snare motif	Vesicular.transport	0.1428	0.068	-0.1114	0.454	1.19	202	0	0	0	0	utr_Tb927.8.2860
Tb927.11.16690	VCL3 Voltage-gated Chloride channel Like	Vesicular.transport	0.2558	0.000838	0.0013	0.994	1.19	239	0	0	0	0	utr_Tb927.11.16690
Tb927.11.18600	variant surface glycoprotein (VSG), putative	VSG	-0.0759	0.903	-0.3235	0.83	1.19	0	0	0	0	0	utr_Tb927.11.18600.1_1
Tb927.4.2750	hypothetical protein, conserved	ZUnknown	-0.3141	0.000137	-0.5667	1.93e-08	1.19	1918	0	0	0	0	utr_Tb927.4.2750
Tb927.10.3510	tRNA pseudouridine synthase D (TruD), putative	ZUnknown	-0.2534	0.000188	-0.5031	4.49e-06	1.19	466	0	0	0	0	utr_Tb927.10.3510
Tb927.10.15310	hypothetical protein, conserved, linked to melarsoprol resistance, no yeast/human by NCBI	ZUnknown	-0.1987	0.00693	-0.4482	2.34e-05	1.19	5487	0	0	0	0	utr_Tb927.10.15310
Tb927.8.3850	PSP1 C-terminal conserved region, putative	ZUnknown	-0.0723	0.505	-0.3278	0.000412	1.19	1859	0	0	0	0	utr_Tb927.8.3850
Tb927.10.780	Ring finger domain containing protein, putative	ZUnknown	0.692	3.98e-13	0.4351	0.000446	1.19	1176	0	0	0	0	utr_Tb927.10.780
Tb927.9.7000	methyltransferase domain containing protein, putative	ZUnknown	-0.1347	0.161	-0.3853	0.00217	1.19	177	0	0	0	0	utr_Tb927.9.7000
Tb927.3.2460	hypothetical protein, conserved	ZUnknown	0.6003	2.54e-10	0.3493	0.0153	1.19	501	0	0	0	0	utr_Tb927.3.2460
Tb927.3.5260	hypothetical protein, conserved	ZUnknown	-0.082	0.407	-0.3387	0.0206	1.19	261	0	0	0	0	utr_Tb927.3.5260
Tb927.10.2160	hypothetical protein, conserved	ZUnknown	0.4797	0.000737	0.2243	0.125	1.19	509	0	0	0	0	utr_Tb927.10.2160
Tb927.3.630	hypothetical protein, conserved	ZUnknown	0.6345	4.87e-07	0.3822	0.15	1.19	194	0	0	0	0	utr_Tb927.3.630
Tb927.11.2800	hypothetical protein, conserved	ZUnknown	-0.1363	0.327	-0.3899	0.157	1.19	214	0	0	0	0	utr_Tb927.11.2800
Tb927.5.600	hypothetical protein, conserved	ZUnknown	0.0175	0.894	-0.2369	0.234	1.19	74	0	0	0	0	utr_Tb927.5.600
Tb927.1.760	wd40 repeat domain-containing protein	ZUnknown	0.129	0.141	-0.1252	0.365	1.19	549	0	0	0	0	utr_Tb927.1.760
Tb927.1.60	RNA polymerase (pseudogene), putative	ZUnknown	0.1129	0.173	-0.1398	0.408	1.19	241	0	0	0	0	utr_Tb927.1.60
Tb11.v5.0524	hypothetical protein, conserved	ZUnknown	-0.0073	0.959	-0.2548	0.412	1.19	154	0	0	0	0	utr_Tb11.v5.0524.1_1
Tb927.11.16500	hypothetical protein, conserved	ZUnknown	0.0496	0.689	-0.1986	0.481	1.19	135	0	0	0	0	utr_Tb927.11.16500
Tb927.11.4270	hypothetical protein, conserved	ZUnknown	0.0774	0.522	-0.1738	0.503	1.19	86	0	0	0	0	utr_Tb927.11.4270
Tb927.2.4990	hypothetical protein, conserved	ZUnknown	0.1051	0.283	-0.1519	0.51	1.19	199	0	0	0	0	utr_Tb927.2.4990
Tb927.11.2180	hypothetical protein, conserved	ZUnknown	0.1452	0.0905	-0.1065	0.586	1.19	218	0	0	0	0	utr_Tb927.11.2180
Tb927.8.2290	hypothetical protein, conserved	ZUnknown	0.3977	0.00813	0.1485	0.615	1.19	128	0	0	0	0	utr_Tb927.8.2290
Tb927.4.2590	hypothetical protein, conserved	ZUnknown	0.1908	0.0614	-0.064	0.68	1.19	2985	0	0	0	0	utr_Tb927.4.2590
Tb927.5.3290	Protein of unknown function, putative	ZUnknown	0.3075	7.15e-07	0.053	0.733	1.19	1682	0	0	0	0	utr_Tb927.5.3290
Tb927.9.11520	hypothetical protein, conserved	ZUnknown	0.2221	0.0185	-0.0273	0.875	1.19	507	0	0	0	0	utr_Tb927.9.11520
Tb927.8.4895	hypothetical protein	ZUnknown	0.231	0.22	-0.0213	0.895	1.19	1100	0	0	0	0	utr_Tb927.8.4895
Tb927.11.7090	hypothetical protein, conserved	ZUnknown	0.2391	0.113	-0.0171	0.953	1.19	32	0	0	0	0	utr_Tb927.11.7090
Tb927.9.8710	hypothetical protein, conserved	ZUnknown	0.2382	0.0693	-0.0146	0.964	1.19	113	0	0	0	0	utr_Tb927.9.8710
Tb927.8.7830	hypothetical protein, conserved	ZUnknown	-1.1565	4.63e-49	-1.4021	4.44e-23	1.19	485	0	1	1	0	utr_Tb927.8.7830
Tb05.5K5.210	hypothetical protein	ZUnknown	-0.3574	6.36e-07	-0.6107	4.09e-10	1.19	1873	0	1	1	0	utr_Tb05.5K5.210
Tb927.2.2015	hypothetical protein	ZUnknown	-0.3456	0.335	-0.5915	0.000135	1.19	365	0	1	1	0	utr_Tb927.2.2015
Tb11.02.5400	cystathionine beta-synthase, putative	Amino.acids	-0.1555	0.208	-0.396	0.194	1.18	33	0	0	0	0	utr_Tb11.02.5400
Tb927.3.1760	chaperone DNAj, putative, J36	Chaperone	-0.0994	0.366	-0.3376	0.0205	1.18	211	0	0	0	0	utr_Tb927.3.1760
Tb927.10.350	BBP59	Cytoskeleton	0.211	0.054	-0.0305	0.82	1.18	1674	0	0	0	0	utr_Tb927.10.350
Tb927.8.5465	flagellar calcium-binding protein,24 kDa calflagin, (Tb-24)	Cytoskeleton	-1.1364	6.26e-45	-1.3809	9.62e-31	1.18	166	0	1	1	0	utr_Tb927.8.5465
Tb927.6.2940	phosphopantothenoylcysteine decarboxylase, putative (PPCDC)	Enzyme	-0.1633	0.0876	-0.402	0.0669	1.18	133	0	0	0	0	utr_Tb927.6.2940
Tb927.9.10580	3-demethylubiquinone-9 3-methyltransferase, putative	Enzyme	-0.0443	0.753	-0.278	0.246	1.18	160	0	0	0	0	utr_Tb927.9.10580
Tb927.7.5210	hypothetical protein, conserved, phosphatase domain and DUF	Enzyme	0.1444	0.0215	-0.0892	0.368	1.18	879	0	0	0	0	utr_Tb927.7.5210
Tb927.4.1360	Aldose-1-epimerase, putative	Glucose.glycerol	0.337	0.000212	0.0945	0.541	1.18	277	0	0	0	0	utr_Tb927.4.1360
Tb927.5.320	GRESAG 4, putative receptor-type adenylate cyclase	GRESAG	1.2476	2.01e-45	1.0039	3.05e-06	1.18	603	0	0	0	0	utr_Tb927.5.320
Tb927.10.16000	GRESAG 4, putative receptor-type adenylate cyclase	GRESAG	0.4664	2.24e-08	0.2242	0.318	1.18	99	0	0	0	0	utr_Tb927.10.16000
Tb927.10.12980	methyltransferase, NOL1/NOP2/sun family	Lysosome	-0.1316	0.086	-0.3671	0.323	1.18	38	0	0	0	0	utr_Tb927.10.12980
Tb927.5.4010	ESP4 Enriched in surface-labeled proteome	Membrane.protein	-2.238	3.11e-110	-2.4741	4.32e-37	1.18	102	0	1	1	0	utr_Tb927.5.4010
Tb927.8.2530	NADH-ubiquinone oxidoreductase complex I subunit, putative	Mito.e.transport	0.4527	0.000101	0.2188	0.643	1.18	28	0	0	0	0	utr_Tb927.8.2530
Tb927.4.1540	POMP27, NAD-dependent epimerase, aldehyde reductase, one putative TM domain	Mito.membrane	-0.0206	0.827	-0.257	0.0024	1.18	2129	0	0	0	0	utr_Tb927.4.1540
Tb927.8.6040	Kinetoplast ribosomal PPR-repeat containing protein 11 KRIP11	Mito.RNA	0.1476	0.192	-0.0917	0.777	1.18	82	0	0	0	0	utr_Tb927.8.6040
Tb927.5.3410	Mitochondrial ribosomal protein L9	Mito.translation	0.2461	0.0621	0.0129	0.955	1.18	175	0	0	0	0	utr_Tb927.5.3410
Tb927.1.1530	protein kinase, putative	Protein.kinase	-0.248	0.000509	-0.4914	0.000111	1.18	3626	0	0	0	0	utr_Tb927.1.1530
Tb927.11.6990	protein kinase, putative,serine/threonine protein kinase, putative	Protein.kinase	0.1537	0.0858	-0.0807	0.426	1.18	1572	0	0	0	0	utr_Tb927.11.6990
Tb927.3.4670	CRK10 cdc2- like protein kinase	Protein.kinase	0.1877	0.0283	-0.0491	0.732	1.18	1035	0	0	0	0	utr_Tb927.3.4670
Tb927.10.16030	MAPK2 protein kinase	Protein.kinase	0.0774	0.525	-0.1569	0.745	1.18	43	0	0	0	0	utr_Tb927.10.16030
Tb05.5K5.30	serine/threonine protein phosphatase, putative	Protein.phosphatase	0.7113	4.26e-25	0.4722	0.0338	1.18	2182	0	0	0	0	utr_Tb05.5K5.30
Tb927.10.10850	AGO1	RNA.degradation	0.1704	0.0384	-0.0682	0.587	1.18	624	0	0	0	0	utr_Tb927.10.10850
Tb927.10.7280	pre-mRNA splicing factor ATP-dependent RNA helicase, putative	RNA.processing	0.2465	0.000786	0.0017	0.995	1.18	79	0	0	0	0	utr_Tb927.10.7280
Tb927.9.10250	small nuclear ribonucleoprotein Sm-F	RNA.processing	0.0098	0.968	-0.2283	0.0452	1.18	579	0	0	0	0	utr_Tb927.9.10250
Tb927.11.1390	class I transcription factor A, subunit 1 (CITFA-1)	RNA.synthesis	-0.8679	8.43e-24	-1.1068	1.4e-25	1.18	533	0	1	1	0	utr_Tb927.11.1390
Tb927.3.2470	PUF8	rRNA.tRNA.process	-0.4062	5.16e-08	-0.6427	1.69e-09	1.18	891	0	1	1	0	utr_Tb927.3.2470
Tb927.10.14090	transporter, putative	Transporter	0.1785	0.0198	-0.0566	0.832	1.18	298	0	0	0	0	utr_Tb927.10.14090
Tb927.4.770	ubiquitin-protein ligase, putative (upl3)	Ubiquitin.proteasome	-0.2982	7.2e-06	-0.5316	0.000139	1.18	510	0	0	0	0	utr_Tb927.4.770
Tb927.11.5020	Possible Listerin homologue, maybe implicated in RQC	Ubiquitin.proteasome	-0.1573	0.0137	-0.4	0.00336	1.18	160	0	0	0	0	utr_Tb927.11.5020
Tb927.11.7460	luminal binding protein 1 (BiP), putative	Vesicular.transport	-0.2288	0.00157	-0.4618	0.000176	1.18	224	0	0	0	0	utr_Tb927.11.7460
Tb11.v5.0327	variant surface protein, putative	VSG	0.649	NA	0.4051	0.0952	1.18	0	0	0	0	0	utr_Tb11.v5.0327.1_1
Tb927.4.680	hypothetical protein, conserved	ZUnknown	-0.4434	0.00024	-0.6871	0.0794	1.18	45	0	0	0	0	utr_Tb927.4.680
Tb927.10.3430	hypothetical protein, conserved	ZUnknown	0.0935	0.316	-0.1513	0.223	1.18	502	0	0	0	0	utr_Tb927.10.3430
Tb927.8.3280	Beta-lactamase superfamily domain containing protein, putative	ZUnknown	0.0827	0.488	-0.1618	0.432	1.18	240	0	0	0	0	utr_Tb927.8.3280
Tb927.3.710	RING-variant domain containing protein, putative	ZUnknown	0.0584	0.575	-0.1862	0.455	1.18	127	0	0	0	0	utr_Tb927.3.710
Tb927.11.1230	hypothetical protein, conserved	ZUnknown	0.188	0.0577	-0.055	0.696	1.18	1918	0	0	0	0	utr_Tb927.11.1230
Tb927.11.7330	hypothetical protein, conserved	ZUnknown	0.297	0.00353	0.0532	0.812	1.18	180	0	0	0	0	utr_Tb927.11.7330
Tb927.5.1980	Galactose oxidase, central domain/Kelch motif containing protein, putative	ZUnknown	-0.302	2.98e-05	-0.5383	7.88e-06	1.18	2277	0	0	0	0	utr_Tb927.5.1980
Tb927.10.390	DUF2407 ubiquitin-like domain containing protein, putative	ZUnknown	-0.0702	0.532	-0.3103	5.63e-05	1.18	1461	0	0	0	0	utr_Tb927.10.390
Tb927.4.4560	hypothetical protein, conserved	ZUnknown	-0.0858	0.325	-0.3261	7.62e-05	1.18	1505	0	0	0	0	utr_Tb927.4.4560
Tb927.9.13350	hypothetical protein, conserved	ZUnknown	-0.2241	0.0278	-0.4616	0.0059	1.18	117	0	0	0	0	utr_Tb927.9.13350
Tb927.11.11420	hypothetical protein	ZUnknown	0.4023	0.769	0.1612	0.044	1.18	4377	0	0	0	0	utr_Tb927.11.11420
Tb927.5.3890	hypothetical protein, conserved	ZUnknown	0.6526	9.01e-10	0.4183	0.0631	1.18	210	0	0	0	0	utr_Tb927.5.3890
Tb927.8.7290	Regulator of chromosome condensation (RCC1) repeat, putative	ZUnknown	-0.0174	0.91	-0.2571	0.0674	1.18	881	0	0	0	0	utr_Tb927.8.7290
Tb927.7.3400	MORN repeat, putative	ZUnknown	-0.0367	0.79	-0.2775	0.0822	1.18	98	0	0	0	0	utr_Tb927.7.3400
Tb927.7.4680	hypothetical protein, conserved	ZUnknown	0.042	0.839	-0.1965	0.207	1.18	1267	0	0	0	0	utr_Tb927.7.4680
Tb927.8.1290	hypothetical protein, conserved, no domains, copurifies with ZC3H32	ZUnknown	0.1427	0.112	-0.0923	0.353	1.18	4056	0	0	0	0	utr_Tb927.8.1290
Tb927.11.12365	hypothetical protein	ZUnknown	0.4387	0.00907	0.1966	0.353	1.18	181	0	0	0	0	utr_Tb927.11.12365
Tb927.9.14140	hypothetical protein, conserved	ZUnknown	0.3572	0.00068	0.1227	0.383	1.18	284	0	0	0	0	utr_Tb927.9.14140
Tb927.11.5470	hypothetical protein, conserved	ZUnknown	-0.0702	0.553	-0.3092	0.384	1.18	30	0	0	0	0	utr_Tb927.11.5470
Tb927.11.4050	hypothetical protein, conserved	ZUnknown	0.0009	0.994	-0.2402	0.401	1.18	131	0	0	0	0	utr_Tb927.11.4050
Tb927.11.2600	hypothetical protein, conserved	ZUnknown	0.0222	0.815	-0.2126	0.433	1.18	217	0	0	0	0	utr_Tb927.11.2600
Tb927.4.2150	hypothetical protein, conserved	ZUnknown	0.1037	0.515	-0.1314	0.6	1.18	113	0	0	0	0	utr_Tb927.4.2150
Tb11.v5.0276	Ribosomal protein S5, C-terminal domain containing protein, putative	ZUnknown	0.3229	0.00618	0.0843	0.79	1.18	116	0	0	0	0	utr_Tb11.v5.0276.1_2
Tb927.9.5000	hypothetical protein, conserved	ZUnknown	0.275	0.00303	0.0421	0.825	1.18	154	0	0	0	0	utr_Tb927.9.5000
Tb927.7.3820	hypothetical protein, conserved	ZUnknown	0.2128	0.0149	-0.0246	0.91	1.18	275	0	0	0	0	utr_Tb927.7.3820
Tb927.2.3340	hypothetical protein	ZUnknown	-3.07	7.17e-87	-3.3117	7.96e-80	1.18	346	0	1	1	0	utr_Tb927.2.3340
Tb927.8.840	hypothetical protein, conserved	ZUnknown	-0.5299	1.66e-13	-0.7714	1.16e-13	1.18	671	0	1	1	0	utr_Tb927.8.840
Tb927.6.4450	hypothetical protein, conserved	ZUnknown	-0.4591	2.55e-07	-0.6997	0.00252	1.18	38	0	1	1	0	utr_Tb927.6.4450
Tb927.11.12410	KKT10, CLK1 protein kinase,	Cell.cycle	-0.2896	1.4e-05	-0.5118	1.03e-07	1.17	2677	0	0	0	0	utr_Tb927.11.12410
Tb927.9.1560	hypothetical protein, conserved, DNAj domain	Chaperone	0.3806	1.26e-07	0.1602	0.272	1.17	327	0	0	0	0	utr_Tb927.9.1560
Tb927.8.7070	FAZ15 flagellar attachment zone protein	Cytoskeleton	-0.055	0.686	-0.2868	0.0827	1.17	160	0	0	0	0	utr_Tb927.8.7070
Tb927.11.16140	DNA replication licensing factor MCM7	DNA	0.2268	0.00364	0.0009	0.997	1.17	258	0	0	0	0	utr_Tb927.11.16140
Tb927.11.8480	DNA polymerase kappa, putative,DNA polymerase IV, putative	DNA	-0.9598	1.41e-07	-1.1911	0.00174	1.17	449	0	1	1	0	utr_Tb927.11.8480
Tb927.9.3360	N-acetyltransferase, putative	Enzyme	0.1335	0.175	-0.0938	0.715	1.17	48	0	0	0	0	utr_Tb927.9.3360
Tb927.10.10650	NAR1 Cytosolic iron-sulphur cluster biogenesis, hydrogenase large subunit	Enzyme	0.1494	0.125	-0.0712	0.662	1.17	249	0	0	0	0	utr_Tb927.10.10650
Tb927.10.1690	NBP35, iron-sulfur cluster Fe-S	Enzyme	0.2342	0.0501	0.0112	0.98	1.17	95	0	0	0	0	utr_Tb927.10.1690
Tb927.11.5940	GRESAG 4, putative receptor-type adenylate cyclase	GRESAG	-1.3653	1.85e-63	-1.5928	6.21e-39	1.17	1307	0	1	1	0	utr_Tb927.11.5940
Tb927.10.7100	delta-4 fatty acid desaturase	Lipids	0.0867	0.545	-0.143	0.671	1.17	397	0	0	0	0	utr_Tb927.10.7100
Tb927.2.170	leucine-rich repeat protein (LRRP)	LRRP	-0.5443	6.69e-11	-0.7672	9.73e-10	1.17	1893	0	1	1	0	utr_Tb927.2.170
Tb11.v5.0153	BarP protein, putative	Membrane.protein	0.4293	6.93e-05	0.205	0.045	1.17	1716	0	0	0	0	utr_Tb11.v5.0153.1_1
Tb927.1.730	NADH-ubiquinone oxidoreductase complex I subunit, putative	Mito.e.transport	-0.1018	0.277	-0.3341	0.0435	1.17	202	0	0	0	0	utr_Tb927.1.730
Tb927.8.1240	electron transfer flavoprotein-ubiquinone oxidoreductase, putative	Mito.e.transport	0.4282	2.29e-07	0.2032	0.107	1.17	719	0	0	0	0	utr_Tb927.8.1240
Tb927.9.12500	POMP7	Mito.membrane	0.3228	0.0075	0.0924	0.656	1.17	700	0	0	0	0	utr_Tb927.9.12500
Tb927.1.1730	conserved protein, unknown function	Mito.pathway	-0.2512	0.000975	-0.4734	0.0028	1.17	154	0	0	0	0	utr_Tb927.1.1730
Tb927.8.5860	mitochondrial ribosomal protein L17	Mito.translation	0.3977	0.000223	0.1655	0.502	1.17	143	0	0	0	0	utr_Tb927.8.5860
Tb927.8.4860	kinetoplast ribosomal PPR-repeat containing protein 10	Mito.translation	0.0789	0.402	-0.1514	0.628	1.17	52	0	0	0	0	utr_Tb927.8.4860
Tb927.9.12850	SpoU rRNA Methylase family, putative	Mito.translation	0.1284	0.133	-0.0926	0.788	1.17	73	0	0	0	0	utr_Tb927.9.12850
Tb927.5.1360	nucleoside 2-deoxyribosyltransferase (NDRT)	Nucleotides	-0.2799	0.00211	-0.5096	1.3e-09	1.17	721	0	0	0	0	utr_Tb927.5.1360
Tb11.v5.1051	nucleobase/nucleoside transporter 8.1, putative	Nucleotides	0.1085	0.468	-0.1185	0.494	1.17	1009	0	0	0	0	utr_Tb11.v5.1051.1_1
Tb927.11.13130	membrane-bound acid phosphatase 1 precursor (MBAP1)	Phosphatase	-0.1164	0.144	-0.3413	0.00385	1.17	239	0	0	0	0	utr_Tb927.11.13130
Tb927.11.5860	protein kinase, putative	Protein.kinase	0.1893	0.144	-0.0415	0.81	1.17	808	0	0	0	0	utr_Tb927.11.5860
Tb927.2.5050	protein phosphatase 2C, putative	Protein.phosphatase	0.1754	0.0827	-0.0522	0.749	1.17	354	0	0	0	0	utr_Tb927.2.5050
Tb927.4.4510	protein phosphatase 2C, putative	Protein.phosphatase	-0.393	1.31e-07	-0.6153	1.44e-16	1.17	2512	0	1	1	0	utr_Tb927.4.4510
Tb927.11.15350	RBP39	RNA.binding	0.2103	0.0794	-0.0115	0.967	1.17	191	0	0	0	0	utr_Tb927.11.15350
Tb927.9.13510	PARN-3	RNA.degradation	0.0434	0.671	-0.1857	0.14	1.17	339	0	0	0	0	utr_Tb927.9.13510
Tb927.10.4500	mRNA capping methyltransferase, putative	RNA.processing	0.1666	0.121	-0.0597	0.79	1.17	255	0	0	0	0	utr_Tb927.10.4500
Tb927.3.620	ATP-dependent DEAD/H RNA helicase, putative Dbp7, ribosome biogenesis?	rRNA.tRNA.process	-0.1492	0.0767	-0.3731	0.0206	1.17	208	0	0	0	0	utr_Tb927.3.620
Tb927.10.6800	RBG1, associated with translating ribosomes	Translation	-0.0331	0.753	-0.2557	0.0161	1.17	421	0	0	0	0	utr_Tb927.10.6800
Tb927.4.2510	multidrug resistance-associated protein, putative,p-glycoprotein (PGPA)	Transporter	-0.1144	0.126	-0.3436	0.0448	1.17	81	0	0	0	0	utr_Tb927.4.2510
Tb927.6.2810	ABC transporter, putative	Transporter	0.3882	3.19e-05	0.1589	0.443	1.17	244	0	0	0	0	utr_Tb927.6.2810
Tb927.6.3140	Ubiquitin-like protein	Ubiquitin.proteasome	0.3162	0.00974	0.0937	0.484	1.17	828	0	0	0	0	utr_Tb927.6.3140
Tb927.7.6490	hypothetical protein, conserved	ZUnknown	1.1337	2.59e-44	0.9056	1.36e-25	1.17	581	0	0	0	0	utr_Tb927.7.6490
Tb927.9.6855	hypothetical protein	ZUnknown	0.5992	0.128	0.3724	0.00273	1.17	578	0	0	0	0	utr_Tb927.9.6855
Tb927.11.3720	Ring finger domain containing protein, putative	ZUnknown	-0.0936	0.2	-0.3262	0.0087	1.17	3515	0	0	0	0	utr_Tb927.11.3720
Tb927.11.460	predicted WD40 repeat protein	ZUnknown	-0.2686	0.000556	-0.501	0.0487	1.17	56	0	0	0	0	utr_Tb927.11.460
Tb927.8.6920	hypothetical protein, conserved	ZUnknown	-0.0572	0.615	-0.2883	0.213	1.17	71	0	0	0	0	utr_Tb927.8.6920
Tb927.11.16660	Dopey, N-terminal, putative	ZUnknown	0.1246	0.0681	-0.1041	0.356	1.17	593	0	0	0	0	utr_Tb927.11.16660
Tb927.6.1190	Plus-3 domain/Zinc finger, C3HC4 type (RING finger), putative	ZUnknown	0.2664	0.00507	0.039	0.721	1.17	1435	0	0	0	0	utr_Tb927.6.1190
Tb927.9.6660	hypothetical protein, conserved	ZUnknown	0.1433	0.225	-0.0865	0.859	1.17	20	0	0	0	0	utr_Tb927.9.6660
Tb927.3.4710	hypothetical protein, conserved	ZUnknown	0.209	0.00592	-0.0236	0.868	1.17	1876	0	0	0	0	utr_Tb927.3.4710
Tb927.6.3170	hypothetical protein, conserved	ZUnknown	0.1974	0.0488	-0.029	0.879	1.17	375	0	0	0	0	utr_Tb927.6.3170
Tb927.10.13380	hypothetical protein, conserved	ZUnknown	0.1924	0.019	-0.0385	0.882	1.17	127	0	0	0	0	utr_Tb927.10.13380
Tb927.10.11370	hypothetical protein, conserved	ZUnknown	0.2072	0.21	-0.0243	0.933	1.17	38	0	0	0	0	utr_Tb927.10.11370
Tb927.3.2210	KIF-1 binding protein C terminal, putative	ZUnknown	0.0386	0.715	-0.186	0.159	1.17	547	0	0	0	0	utr_Tb927.3.2210
Tb927.10.1880	hypothetical protein, conserved	ZUnknown	0.3568	0.00131	0.1346	0.596	1.17	139	0	0	0	0	utr_Tb927.10.1880
Tb927.10.15320	hypothetical protein, conserved	ZUnknown	0.1231	0.194	-0.1012	0.601	1.17	278	0	0	0	0	utr_Tb927.10.15320
Tb927.6.4640	hypothetical protein, conserved	ZUnknown	0.165	0.0203	-0.0578	0.762	1.17	178	0	0	0	0	utr_Tb927.6.4640
Tb927.6.2680	transmembrane protein, putative	ZUnknown	0.1235	0.392	-0.0981	0.823	1.17	43	0	0	0	0	utr_Tb927.6.2680
Tb927.3.920	hypothetical protein, conserved	ZUnknown	0.21	0.00628	-0.013	0.948	1.17	207	0	0	0	0	utr_Tb927.3.920
Tb927.10.11920	hypothetical protein, conserved, no clear yeast or human matches	ZUnknown	0.2301	0.066	0.0064	0.98	1.17	98	0	0	0	0	utr_Tb927.10.11920
Tb927.8.7810	hypothetical protein, conserved	ZUnknown	-1.1715	3.52e-16	-1.4011	1.2e-14	1.17	452	0	1	1	0	utr_Tb927.8.7810
Tb927.8.670	hypothetical protein, conserved	ZUnknown	-0.6333	3.97e-11	-0.8606	7.22e-14	1.17	1211	0	1	1	0	utr_Tb927.8.670
Tb927.8.8340	CRAL/TRIO domain containing protein, putative	ZUnknown	-1.4923	1.93e-63	-1.7177	3.38e-47	1.17	747	0	1	1	0	utr_Tb927.8.8340
Tb927.11.11530	histone acetyltransferase HAT2	Chromatin	0.1233	0.143	-0.0968	0.63	1.16	129	0	0	0	0	utr_Tb927.11.11530
Tb927.11.13230	TbVAP, flagellar attachment zone	Cytoskeleton	0.0969	0.266	-0.1205	0.182	1.16	1385	0	0	0	0	utr_Tb927.11.13230
Tb927.5.3460	hypothetical protein, conserved, LysM domain (peptidoglycan binding). trypanosoma-specific	Cytoskeleton	-0.0417	0.714	-0.2545	0.297	1.16	210	0	0	0	0	utr_Tb927.5.3460
Tb927.10.10090	CMF14, possible component of motile flagella, TbTBC-L	Cytoskeleton	0.3474	1.34e-06	0.1335	0.426	1.16	235	0	0	0	0	utr_Tb927.10.10090
Tb927.9.8880	actin A	Cytoskeleton	-0.0524	0.499	-0.2614	8.83e-05	1.16	226	0	0	0	0	utr_Tb927.9.8880
Tb927.8.3430	MKS1	Cytoskeleton	-0.776	1.54e-12	-0.9847	5.73e-05	1.16	198	0	1	1	0	utr_Tb927.8.3430
Tb927.4.4680	GINS complex subunit PSF3, replication initiation	DNA	-0.079	0.708	-0.2964	0.442	1.16	121	0	0	0	0	utr_Tb927.4.4680
Tb927.8.6840	mismatch repair protein MLH1	DNA	0.1536	0.0789	-0.0584	0.637	1.16	866	0	0	0	0	utr_Tb927.8.6840
Tb927.11.7420	phosphoadenosine phosphosulfate reductase-like protein	Enzyme	0.082	0.495	-0.1269	0.601	1.16	260	0	0	0	0	utr_Tb927.11.7420
Tb927.11.18690	expression site-associated gene 4 (ESAG4) protein, putative	ESAG	0.1215	0.619	-0.0946	0.661	1.16	1809	0	0	0	0	utr_Tb927.11.18690.1_1
Tb927.8.7940	GRESAG 4, putative receptor-type adenylate cyclase	GRESAG	-1.237	3.85e-49	-1.4546	4.13e-42	1.16	527	0	1	1	0	utr_Tb927.8.7940
[truncated: 4,965 more rows]

## Sheet: 3. DeSeq2 RPM all
GeneID	GeneID	Suffix	Annotation	Annotation2	Category	baseMean	log2FoldChange	padj	Increase 2x	Decrease 2x	Increase 1.5x	decrease 1.5x	minus1 RPM	minus2 RPM	minus3 RPM	plus1 RPM	plus2 RPM	plus3 RPM
[truncated: 17,619 more rows]

[truncated: 1 more sheets: 4. Read matrix]
