# Supplementary material
Source: HighWire-hosted journal article supplement (doi:10.1101/rna.079258.122)
Supplement: Supplemental_Table_S2.xlsx [file Supplemental_Table_S2.xlsx]

## Sheet: Legend
Sheet 1 Proteins specifically associated with ZC3H18
Proteins are denoted as specifically associated if the P-value was less than 0.01 and the enrichment was greater than 4x. For the comparison with GFP, proteins were also denoted as associated if peptides were present in all three ZC3H18 purifications but none of the GFP purifications, with at least 2 peptides in 2 of the 3 replicates. Results for the three different tagged proteins are colour-cod…
Sheet 2 Filtered protein groups
Sheet 3 Unfiltered protein groups
Sheet 4 MQP parameters
Sheet 4 MQP parameters

## Sheet: 1. Specific association
GeneID	Annotation	Category	DRBD18 not RBSR1 or ZC3H28	DRBD18/ZC3H28 & GFP specific	DRBD18/GFP specific	ZC3H28/GFP specific	RBSR1/GFP specific	DRBD18/ZC3H28 -log10 P-value	DRBD18/ZC3H28 log difference	DRBD18/GFP -log10 P-value	DRBD18/GFP -log difference	RBSR1/GFP -log difference	Number.of.proteins	Peptides	Razor...unique.peptides.A_DRBD18_1	Razor...unique.peptides.B DRBD18_2	Razor...unique.peptides.C DRBD18_3	Razor...unique.peptides.D_GFP_1	Razor...unique.peptides.E_GFP_2	Razor...unique.peptides.F_GFP_3	Razor...unique.peptides.G_Z28_1	Razor...unique.peptides.H_Z28_2	Razor...unique.peptides.I_Z28_3	iBAQ.A DRBD18_1	iBAQ.B DRBD18_2	iBAQ.C DRBD18_3	iBAQ.D GFP_1	iBAQ.E GFP_2	iBAQ.F GFP_3	iBAQ.G Z28_1	iBAQ.H Z28_2	iBAQ.I	LFQ.intensity.A DRBD18_1	LFQ.intensity.B DRBD18_2	LFQ.intensity.C DRBD18_3	LFQ.intensity.D GFP_1	LFQ.intensity.E GFP_2	LFQ.intensity.F GFP_3	LFQ.intensity.G Z28_1	LFQ.intensity.H Z28_2	LFQ.intensity.I Z28_3	iBAQ.peptides	iBAQ	Protein.IDs	Fasta.headers
Tb927.10.16120	inosine-5'-monophosphate dehydrogenase,IMP dehydrogenase	Nucleotides	0	0	1	1	1	0.0846	-0.0541	9.84	5.2427	5.2151	1	45	40	37	38	2	2	7	37	37	32	124020000	78184000	89227000	78658	373410	621440	58268000	89543000	27335000	3090200000	2012800000	2259100000	1613800	5831200	13234000	1585900000	2222400000	809050000	26	467650000	Tb927.10.16120	Tb927.10.16120_inosine-5-monophosphate dehydrogenase,IMP dehydrogenase | location=Tb927_10_v5.1:3965348-3966691(+) | length=447 | sequence_SO=chromosome | SO=protein_coding
Tb927.9.15150	60S ribosomal protein L5	Ribosome	0	0	1	1	1	1.07	-0.7062	8.25	7.0067	5.6436	2	17	15	16	16	0	0	1	15	15	14	101630000	98904000	62378000	0	0	177810	99379000	94730000	45063000	1009000000	928720000	645090000	0	0	0	947700000	970530000	488080000	10	502260000	Tb927.9.15150;Tb927.9.15110	Tb927.9.15150_unspecified product | location=Tb927_09_v5.1:2360401-2361327(+) | length=308 | sequence_SO=chromosome | SO=protein_coding;Tb927.9.15110_unspecifie
Tb927.2.3800	GRBC2 mRNA processing protein, putative GAP1 MRB complex protein	Mito.RNA	0	1	1	1	1	7.04	4.0625	7.56	7.4656	4.8412	1	27	26	23	25	0	0	0	9	13	9	75393000	43347000	64109000	0	0	0	1175800	3224700	1284700	1698900000	894220000	1393200000	0	0	0	33432000	87326000	40674000	22	188530000	Tb927.2.3800	Tb927.2.3800_guide RNA associated protein, GAP1,MRB1-associated protein | location=Tb927_02_v5.1:676599-678077(-) | length=492 | sequence_SO=chromosome | SO=protein_coding
Tb927.10.5620	fructose-bisphosphate aldolase, glycosomal (ALD)	Glucose.glycerol	0	0	1	1	1	1.38	0.4591	6.7	4.923	5.6427	2	47	41	46	39	8	24	18	37	40	37	584970000	491880000	270880000	272630	2365000	2551000	199300000	248800000	99924000	12145000000	10676000000	5269400000	6367700	67225000	53667000	3897900000	5256500000	2079700000	21	1900900000	Tb927.10.5620;Tb11.v5.0531	Tb927.10.5620_fructose-bisphosphate aldolase, glycosomal (ALD) | location=Tb927_10_v5.1:1404259-1405377(+) | length=372 | sequence_SO=chromosome | SO=protein_coding;Tb11.v5.0531 | organism=Trypanosoma_brucei_
Tb927.9.10770	PABP2	Translation	0	0	1	1	1	1.49	-0.5417	6.4	6.2967	4.9013	1	53	43	48	44	2	5	8	40	40	40	241830000	147750000	175750000	38569	407980	791820	194770000	149980000	107740000	7040500000	4239200000	5000400000	0	12528000	21522000	5916400000	4250600000	3010700000	29	1019100000	Tb927.9.10770	Tb927.9.10770_Polyadenylate-binding protein 2 (Poly(A)-binding protein 2) (Poly(A)-binding protein II) (PABII) (Polyadenylate-binding nuclear protein 1) (Nuclear poly(A)-binding protein 1) (PABP2), putative (
Tb927.10.7680	Possible Ran-GAP?	Nuclear.transport	1	1	1	0	0	9.02	10.079	6.28	8.0766	nd	1	37	35	28	27	1	1	0	0	0	0	110820000	46637000	60062000	52189	0	0	0	0	0	2712500000	1126400000	1379600000	0	0	0	0	0	0	24	217570000	Tb927.10.7680	Tb927.10.7680_GTPase activating protein, putative | location=Tb927_10_v5.1:1931608-1933200(-) | length=530 | sequence_SO=chromosome | SO=protein_coding
Tb927.9.13990	DRBD2	RNA.binding	0	0	1	1	1	0.385	0.1571	6.16	7.4435	8.4498	1	24	21	20	20	0	0	0	17	18	16	67047000	50787000	48730000	0	0	0	34875000	35876000	15145000	1164600000	880350000	807660000	0	0	0	596970000	603490000	279340000	18	252460000	Tb927.9.13990	Tb927.9.13990_RNA-binding protein, putative (DRBD2) | location=Tb927_09_v5.1:2183754-2185266(-) | length=305 | sequence_SO=chromosome | SO=protein_coding
Tb927.7.2570	GRBC1 guide RNA associated protein, GAP2	Mito.RNA	0	1	1	1	1	7.01	4.4664	6.1	7.7423	6.6788	2	26	26	23	25	0	0	0	8	13	7	75756000	41156000	65331000	0	0	0	973410	2511700	1003700	1973300000	964360000	1593600000	0	0	0	26320000	81658000	29035000	25	186730000	Tb927.7.2570;Tb11.v5.0611	Tb927.7.2570_guide RNA associated protein, GAP2 | location=Tb927_07_v5.1:660255-661676(-) | length=473 | sequence_SO=chromosome | SO=protein_coding;Tb11.v5.0611 | organism=Trypanosoma_brucei_TREU927 | product
Tb927.10.7630	transportin2- like protein	Nuclear.transport	1	1	1	0	0	8.72	8.0868	5.99	6.2257	nd	1	34	32	27	29	0	0	0	0	0	0	27512000	13035000	16307000	0	0	0	0	0	0	959290000	538550000	627500000	0	0	0	0	0	0	38	56854000	Tb927.10.7630	Tb927.10.7630_transportin2- like protein | location=Tb927_10_v5.1:1920059-1922884(-) | length=941 | sequence_SO=chromosome | SO=protein_coding
Tb927.11.2060	60S acidic ribosomal subunit	Ribosome	0	0	1	1	1	2.6	-0.9258	5.69	5.8941	4.3243	2	22	20	16	12	0	1	1	17	17	14	85030000	66662000	29256000	0	250880	390750	62003000	75723000	37183000	1304400000	1008100000	503270000	0	0	0	1070000000	1192600000	615340000	16	356500000	Tb927.11.2060;Tb927.11.2050	Tb927.11.2060_60S acidic ribosomal subunit protein, putative | location=Tb927_11_v5.1:592664-593644(+) | length=324 | sequence_SO=chromosome | SO=protein_coding;Tb927.11.2050 | organism=Trypanosoma_brucei_TRE
Tb927.9.8740	DRBD3 (PTB1)	RNA.binding	0	0	1	1	1	0.584	0.3892	5.64	4.4282	1.6863	1	9	9	8	7	0	0	0	8	8	6	14242000	7138100	6024500	0	0	0	4379700	4553500	2052800	145310000	84543000	68290000	0	0	0	49184000	46378000	28592000	11	38390000	Tb927.9.8740	Tb927.9.8740_RNA-binding protein (DRBD3) | location=Tb927_09_v5.1:1408798-1409781(-) | length=327 | sequence_SO=chromosome | SO=protein_coding
Tb927.11.980	TbNup158 Outer ring, FG Nup facing both sides	Nuclear.transport	1	1	1	0	0	7.02	8.0474	5.47	6.2949	nd	1	42	40	34	37	0	0	0	0	0	0	14465000	7648000	11740000	0	0	0	0	0	0	727560000	408360000	584690000	0	0	0	0	0	0	51	33853000	Tb927.11.980	Tb927.11.980_Nucleoporin (TbNup158) | location=Tb927_11_v5.1:249745-254406(+) | length=1553 | sequence_SO=chromosome | SO=protein_coding
Tb927.11.9710	60S ribosomal protein L10a	Ribosome	0	0	1	1	1	2.01	-1.2942	5.34	6.3613	5.4138	2	25	21	19	16	0	1	1	24	21	15	41005000	41402000	14788000	0	0	0	44778000	59321000	25196000	422900000	418600000	169660000	0	0	0	461180000	527190000	265370000	10	226490000	Tb927.11.9710;Tb927.10.13500	Tb927.11.9710_60S ribosomal protein L10a, putative (RPL10A) | location=Tb927_11_v5.1:2632935-2633579(-) | length=214 | sequence_SO=chromosome | SO=protein_coding;Tb927.10.13500 | organism=Trypanosoma_brucei_T
Tb927.2.5240	PRP19	RNA.processing	0	0	1	1	1	0.945	-0.7401	5.19	4.3264	6.56	1	23	17	17	13	0	0	0	19	20	9	9201500	6421800	3867100	0	0	0	8615200	10618000	1673900	247470000	186450000	118570000	0	0	0	224130000	281700000	72805000	28	40397000	Tb927.2.5240	Tb927.2.5240_PRP19-like protein, putative (TbPRP19) | location=Tb927_02_v5.1:921221-922750(+) | length=509 | sequence_SO=chromosome | SO=protein_coding
Tb11.02.5390b	Guide RNA binding complex protein 4	Mito.RNA	1	1	1	0	0	6.17	6.2881	5.17	4.8835	nd	2	36	25	28	33	0	0	0	0	0	0	3298600	2880700	4276200	0	0	0	0	0	0	234980000	170410000	253310000	0	0	0	0	0	0	63	10456000	Tb11.02.5390b;Tb11.02.5390	Tb11.02.5390b_mRNA processing protein, putative | location=Tb927_11_bin_v5.1:653545-656808(+) | length=1087 | sequence_SO=random_sequence | SO=protein_coding;Tb11.02.5390 | organism=Trypanosoma_brucei_TREU927
Tb927.11.2950	TbNup89 Outer ring	Nuclear.transport	1	1	1	0	0	4.82	7.9044	5.08	5.3831	nd	1	37	36	24	27	0	0	0	0	0	0	12925000	4897200	7666000	0	0	0	0	0	0	509010000	245040000	332730000	0	0	0	0	0	0	43	25488000	Tb927.11.2950	Tb927.11.2950_Nucleoporin (TbNup89) | location=Tb927_11_v5.1:858932-861322(-) | length=796 | sequence_SO=chromosome | SO=protein_coding
Tb927.10.14950	ZC3H40	RNA.binding	0	0	1	1	0	0.013	-0.0237	5.04	4.047	nd	1	16	9	13	6	0	0	0	9	16	3	2964200	4895200	2029600	0	0	0	2148800	5718600	418450	78053000	89341000	46622000	0	0	0	53464000	103950000	10245000	21	18175000	Tb927.10.14950	Tb927.10.14950_RNA binding protein, putative,zinc finger protein family member, putative (ZC3H40) | location=Tb927_10_v5.1:3654477-3655775(+) | length=432 | sequence_SO=chromosome | SO=protein_coding
Tb927.10.1100	60S ribosomal protein L9	Ribosome	0	0	1	1	1	0.783	-0.8091	4.96	5.2488	4.3608	2	13	7	10	9	0	0	0	13	10	7	5171300	12084000	12870000	0	0	0	22781000	9268400	4804900	96355000	132360000	149580000	0	0	0	210100000	89874000	58513000	11	66980000	Tb927.10.1100;Tb927.6.4690	Tb927.10.1100_60S ribosomal protein L9, putative | location=Tb927_10_v5.1:291635-292204(-) | length=189 | sequence_SO=chromosome | SO=protein_coding;Tb927.6.4690 | organism=Trypanosoma_brucei_TREU927 | produc
Tb927.8.8180	mitochondrial RNA binding complex 1 subunit (MRB8180)	Mito.RNA	1	1	1	0	0	4.72	7.1219	4.92	6.45	nd	2	32	28	24	30	0	0	0	0	5	0	16905000	8367800	12672000	0	0	0	0	206230	0	761600000	410070000	553590000	0	0	0	0	9576600	0	46	38151000	Tb927.8.8180;Tb927.4.4150	Tb927.8.8180_mitochondrial RNA binding complex 1 subunit (MRB8180) | location=Tb927_08_v5.1:2419530-2422334(+) | length=934 | sequence_SO=chromosome | SO=protein_coding;Tb927.4.4150 | organism=Trypanosoma_bru
Tb927.5.3010	GRBC6 MRB1 complex subunit MRB3010 (MRB3010)	Mito.RNA	1	1	1	0	0	6.21	7.6996	4.79	5.3899	nd	2	26	26	21	19	0	0	0	0	0	0	14168000	9631500	10654000	0	0	0	0	0	0	334920000	258400000	250960000	0	0	0	0	0	0	26	34453000	Tb927.5.3010;Tb11.v5.0691	Tb927.5.3010_MRB1-associated protein, putative,guide RNA binding protein, putative | location=Tb927_05_v5.1:1001145-1002695(+) | length=516 | sequence_SO=chromosome | SO=protein_coding;Tb11.v5.0691 | organism
Tb927.8.8170	REMC5A mitochondrial RNA binding protein 1, putative (MRB8170)	Mito.RNA	1	1	1	0	0	5.93	6.6889	4.78	4.3363	nd	1	37	33	19	29	0	0	0	0	0	0	6273400	2847200	5677500	0	0	0	0	0	0	277610000	171130000	252160000	0	0	0	0	0	0	48	14798000	Tb927.8.8170	Tb927.8.8170_mitochondrial RNA binding protein 1, putative (MRB8170) | location=Tb927_08_v5.1:2416165-2418882(+) | length=905 | sequence_SO=chromosome | SO=protein_coding
Tb927.10.5370	40S ribosomal protein S10	Ribosome	0	0	1	1	1	1.24	-1.1056	4.76	4.5364	5.8882	2	12	9	8	8	0	0	0	12	12	7	13031000	7886900	9565300	0	0	0	17257000	19725000	6362400	105550000	68875000	77810000	0	0	0	99606000	97824000	67117000	7	73827000	Tb927.10.5370;Tb927.10.5360	Tb927.10.5370_40S ribosomal protein S10, putative | location=Tb927_10_v5.1:1349780-1350298(+) | length=172 | sequence_SO=chromosome | SO=protein_coding;Tb927.10.5360 | organism=Trypanosoma_brucei_TREU927 | pr
Tb927.9.9290	PABP1	Translation	0	0	1	1	1	0.264	-0.2232	4.75	5.1817	7.8947	1	31	24	19	24	0	0	0	27	22	16	13710000	6150200	10801000	0	0	0	11274000	7605000	2760800	398560000	205710000	274630000	0	0	0	273560000	209180000	100560000	28	52300000	Tb927.9.9290	Tb927.9.9290_Polyadenylate-binding protein 1 (Poly(A)-binding protein 1) (PABP 1) (PABP1) | location=Tb927_09_v5.1:1478262-1479962(-) | length=566 | sequence_SO=chromosome | SO=protein_coding
Tb927.2.4710	TRRM1	RNA.processing	0	0	1	1	1	0.437	0.2827	4.61	4.686	4.9137	1	15	11	13	11	0	0	0	11	10	6	5532400	9352900	5902800	0	0	0	3939800	4090500	1503600	104780000	157290000	165710000	0	0	0	87236000	84210000	37543000	21	30322000	Tb927.2.4710	Tb927.2.4710_RNA-binding protein, putative (TRRM1) | location=Tb927_02_v5.1:833328-834653(-) | length=441 | sequence_SO=chromosome | SO=protein_coding
Tb927.8.6250	TbNup76 Complex+149, 140, symmetric, interact MEX67	Nuclear.transport	1	1	1	0	0	6.32	6.9717	4.54	4.7265	nd	1	25	23	18	20	0	0	0	0	0	0	9186800	4018700	5040700	0	0	0	0	0	0	338260000	178560000	249530000	0	0	0	0	0	0	42	18246000	Tb927.8.6250	Tb927.8.6250_hypothetical protein, conserved | location=Tb927_08_v5.1:1816925-1819000(+) | length=691 | sequence_SO=chromosome | SO=protein_coding
Tb927.4.2040	ALBA3	RNA.binding	0	0	1	1	1	0.549	-0.6037	4.54	3.0261	4.6675	2	11	7	6	5	0	0	1	9	8	4	11778000	7263500	2994500	0	0	204130	9406400	8143600	3039500	84333000	61689000	40270000	0	0	0	57219000	44382000	28000000	8	42830000	Tb927.4.2040;Tb927.4.2030	Tb927.4.2040_ALBA-Domain Protein (ALBA3) | location=Tb927_04_v5.1:512242-512814(-) | length=190 | sequence_SO=chromosome | SO=protein_coding;Tb927.4.2030_ALBA-D
Tb927.10.10830	RGG2, MRB complex component	Mito.RNA	0	1	1	1	1	5.3	6.2641	4.51	7.1487	2.6293	1	14	12	10	12	0	0	0	2	2	1	64566000	45007000	63112000	0	0	0	479020	1262400	243980	698680000	429060000	589700000	0	0	0	4754500	12547000	0	10	174670000	Tb927.10.10830	Tb927.10.10830_RGG2 (RGG2) | location=Tb927_10_v5.1:2630304-2631266(-) | length=320 | sequence_SO=chromosome | SO=protein_coding
Tb927.6.4300	glyceraldehyde 3-phosphate dehydrogenase, glycosomal (GAPDH)	Glucose.glycerol	0	0	1	1	1	1.06	-0.4871	4.33	3.1724	1.6828	2	33	32	31	31	8	10	21	31	33	30	323160000	385550000	266260000	3191200	1545400	5109800	300460000	419740000	121210000	7330500000	9222800000	6087100000	90977000	43520000	140910000	6748500000	9399500000	2854900000	23	1826200000	Tb927.6.4300;Tb927.6.4280	Tb927.6.4300_glyceraldehyde 3-phosphate dehydrogenase, glycosomal (GAPDH) | location=Tb927_06_v5.1:1220755-1221834(-) | length=359 | sequence_SO=chromosome | SO=protein_coding;Tb927.6.4280 | organism=Trypanos
Tb927.3.1590	mitochondrial RNA binding complex 1 subunit (MRB1590)	Mito.RNA	0	0	1	1	1	1.79	1.0995	4.3	4.0049	3.5115	1	23	17	20	23	0	0	0	10	9	9	4372900	4507400	6446300	0	0	0	1110900	1000500	861120	141160000	131390000	181650000	0	0	0	54914000	49468000	45285000	33	18299000	Tb927.3.1590	Tb927.3.1590_mitochondrial RNA binding complex 1 subunit (MRB1590) | location=Tb927_03_v5.1:414759-416765(-) | length=668 | sequence_SO=chromosome | SO=protein_coding
Tb927.10.2370	LA	Nuclear.transport	0	1	1	1	1	4.48	2.2285	4.22	3.6831	3.2433	1	13	12	8	7	0	0	0	3	4	2	4498600	3162600	2510800	0	0	0	350200	601120	197080	103620000	70870000	52390000	0	0	0	10298000	15352000	7833700	23	11320000	Tb927.10.2370	Tb927.10.2370_RNA-binding protein, putative (LA) | location=Tb927_10_v5.1:607374-608381(+) | length=335 | sequence_SO=chromosome | SO=protein_coding
Tb927.11.11370	guanine nucleotide-binding protein beta subunit- like protein (TRACK)	Translation	0	0	1	1	1	5.37	-1.4368	4.17	5.0549	4.5463	2	24	19	18	18	2	1	1	20	19	17	29114000	15766000	17214000	67753	0	0	32864000	37395000	21484000	565110000	289670000	329890000	0	0	0	672660000	722190000	343390000	19	153900000	Tb927.11.11370;Tb927.11.11360	Tb927.11.11370_receptor for activated C kinase 1 (RACK1) | location=Tb927_11_v5.1:3037315-3038271(+) | length=318 | sequence_SO=chromosome | SO=protein_coding;Tb927.11.11360 | organism=Trypanosoma_brucei_TREU
Tb927.7.2300	TbNup132 Outer ring	Nuclear.transport	1	1	1	0	0	6.28	6.7836	4.12	5.1355	nd	1	31	28	22	27	0	0	0	0	0	0	4977600	2850700	5731000	0	0	0	0	0	0	292570000	187320000	320110000	0	0	0	0	0	0	59	13559000	Tb927.7.2300	Tb927.7.2300_Nucleoporin (TbNup132) | location=Tb927_07_v5.1:590215-593826(-) | length=1203 | sequence_SO=chromosome | SO=protein_coding
Tb927.10.14710	40S ribosomal protein S2	Ribosome	0	0	1	1	1	4.12	-1.0456	4.06	4.8071	5.2323	2	15	12	12	12	0	0	1	12	10	12	14938000	9631600	7176400	0	0	0	12861000	9644600	9481400	235500000	162020000	128630000	0	0	0	227930000	185790000	202100000	18	63733000	Tb927.10.14710;Tb927.10.14600	Tb927.10.14710_40S ribosomal protein S2, putative (RPS2) | location=Tb927_10_v5.1:3591980-3592780(-) | length=266 | sequence_SO=chromosome | SO=protein_coding;Tb927.10.14600 | organism=Trypanosoma_brucei_TREU
Tb927.11.15640	MERS1 mitochondrial RNA binding complex 1 subunit	Mito.RNA	0	1	1	0	1	9.48	7.073	4	5.7329	1.3596	1	18	16	10	15	0	0	0	0	1	0	21074000	10661000	17804000	0	0	0	0	95049	0	456170000	224390000	306060000	0	0	0	0	0	0	20	49634000	Tb927.11.15640	Tb927.11.15640_mitochondrial RNA binding complex 1 subunit,NUDIX hydrolase, conserved | location=Tb927_11_v5.1:4147833-4149020(-) | length=395 | sequence_SO=chromosome | SO=protein_coding
Tb927.11.11080	TbNup149 Nup76 complex, FG, symmetric, interact MEX67	Nuclear.transport	1	1	1	0	0	5.6	7.6031	3.97	5.3827	nd	1	26	24	19	16	0	0	0	0	0	0	8161000	4338700	5526800	0	0	0	0	0	0	704290000	449710000	534980000	0	0	0	0	0	0	94	18027000	Tb927.11.11080	Tb927.11.11080_Nucleoporin (TbNup149) | location=Tb927_11_v5.1:2966881-2971249(+) | length=1439 | sequence_SO=chromosome | SO=protein_coding
Tb927.8.6030	60S ribosomal protein L12	Ribosome	0	0	1	1	1	0.152	-0.1784	3.93	5.0424	2.937	2	5	4	4	4	0	1	1	3	5	3	51500000	47340000	31104000	0	679930	216510	28225000	33523000	18250000	412790000	362590000	239720000	0	0	0	220910000	277220000	143350000	8	210840000	Tb927.8.6030;Tb927.9.14000	Tb927.8.6030_60S ribosomal protein L12, putative | location=Tb927_08_v5.1:1761630-1762159(+) | length=164 | sequence_SO=chromosome | SO=protein_coding;Tb927.9.14000 | organism=Trypanosoma_brucei_TREU927 | pro
Tb927.11.2340	hypothetical protein, conserved	ZUnknown	1	1	1	0	0	6.09	7.2839	3.93	5.055	nd	1	21	20	14	12	0	0	0	0	0	0	12374000	8324700	3573200	0	0	0	0	0	0	309330000	202050000	119680000	0	0	0	0	0	0	26	24272000	Tb927.11.2340	Tb927.11.2340_hypothetical protein, conserved | location=Tb927_11_v5.1:669889-671475(+) | length=528 | sequence_SO=chromosome | SO=protein_coding
Tb927.3.1840	3-oxo-5-alpha-steroid 4-dehydrogenase, putative	Sterols	0	0	0	0	0	4.47	3.8344	3.92	-4.3036	nd	1	9	3	4	2	6	6	5	0	0	0	1242200	1568300	380580	2731800	1912500	1550400	0	0	0	20814000	24634000	12865000	26622000	19372000	17707000	0	0	0	13	9385700	Tb927.3.1840	Tb927.3.1840_3-oxo-5-alpha-steroid 4-dehydrogenase, putative | location=Tb927_03_v5.1:477826-478722(-) | length=298 | sequence_SO=chromosome | SO=protein_coding
Tb927.10.2240	NTF2-like domain, in Y14 TAP	Nuclear.transport	0	0	1	1	1	0.111	-0.2209	3.89	3.8278	7.2316	1	22	14	16	15	0	0	0	18	18	5	3691600	5703700	5831800	0	0	0	9430500	6387200	510260	116880000	171290000	170820000	0	0	0	232250000	165240000	25403000	28	31555000	Tb927.10.2240	Tb927.10.2240_hypothetical protein, conserved | location=Tb927_10_v5.1:578334-580100(+) | length=588 | sequence_SO=chromosome | SO=protein_coding
Tb927.9.5690	60S acidic ribosomal protein	Ribosome	0	0	1	1	1	0.418	-0.6156	3.83	4.054	5.4665	1	7	6	7	6	0	0	0	6	6	4	10488000	12875000	8134100	0	0	0	10217000	12844000	4156600	58395000	53390000	41159000	0	0	0	51959000	62226000	26453000	5	58716000	Tb927.9.5690	Tb927.9.5690_60S acidic ribosomal protein, putative | location=Tb927_09_v5.1:976021-976362(+) | length=113 | sequence_SO=chromosome | SO=protein_coding
Tb927.8.900	splicing factor TSR1 (TSR1)	RNA.processing	0	0	1	1	1	1.32	-1.2253	3.83	4.5061	5.6292	1	14	9	10	5	0	0	0	8	13	6	6757000	12448000	2028600	0	0	0	8179000	18842000	2682200	107380000	185970000	57053000	0	0	0	146450000	270830000	47305000	16	50937000	Tb927.8.900	Tb927.8.900_splicing factor TSR1 (TSR1) | location=Tb927_08_v5.1:267851-269421(-) | length=328 | sequence_SO=chromosome | SO=protein_coding
Tb927.9.14240	TbNup82 Outer ring	Nuclear.transport	1	1	1	0	0	6.45	6.7679	3.77	4.2561	nd	2	18	18	13	14	0	0	0	0	0	0	10115000	3821800	5654000	0	0	0	0	0	0	276730000	147530000	202660000	0	0	0	0	0	0	32	19591000	Tb927.9.14240;Tb11.v5.0621	Tb927.9.14240_Nucleoporin (Nup82) | location=Tb927_09_v5.1:2229379-2231694(-) | length=752 | sequence_SO=chromosome | SO=protein_coding;Tb11.v5.0621_hypothetica
Tb927.10.9650	TbNup152 Outer ring	Nuclear.transport	1	1	1	0	0	5.82	6.1147	3.68	4.6253	nd	1	26	23	15	24	0	0	0	0	0	0	4022500	1553000	3456400	0	0	0	0	0	0	264110000	119570000	209850000	0	0	0	0	0	0	66	9032000	Tb927.10.9650	Tb927.10.9650_hypothetical protein, conserved | location=Tb927_10_v5.1:2377684-2381904(+) | length=1406 | sequence_SO=chromosome | SO=protein_coding
Tb927.11.6140	40S ribosomal protein S15A	Ribosome	0	0	1	1	1	0.424	-0.5066	3.59	4.1287	4.6788	2	8	6	4	4	0	1	0	7	7	5	15186000	7420900	10185000	0	110550	0	12068000	7162400	6863800	85108000	61302000	86661000	0	0	0	73581000	49357000	50755000	7	58998000	Tb927.11.6140;Tb927.3.4360	Tb927.11.6140_40S ribosomal protein S15A, putative | location=Tb927_11_v5.1:1731663-1732055(-) | length=130 | sequence_SO=chromosome | SO=protein_coding;Tb927.3.4360 | organism=Trypanosoma_brucei_TREU927 | pr
Tb927.7.240	40S ribosomal protein S33	Ribosome	0	0	1	1	1	0.395	-0.5972	3.59	3.8344	7.7653	2	6	5	3	2	0	0	0	5	5	2	12366000	4947200	4832200	0	0	0	7269800	9915600	3202800	55249000	28466000	37674000	0	0	0	34303000	37828000	17623000	5	42534000	Tb927.7.240;Tb927.7.230	Tb927.7.240_40S ribosomal protein S33, putative | location=Tb927_07_v5.1:43919-44230(+) | length=103 | sequence_SO=chromosome | SO=protein_coding;Tb927.7.230_40
Tb927.9.11600	Gim5B protein,glycosomal membrane protein (gim5B)	Glycosome	0	0	0	0	0	2.12	2.1097	3.56	-4.0222	nd	2	7	3	2	5	4	3	4	2	2	2	2093300	1220600	1984100	5095200	1429300	2172600	230880	122200	466960	35561000	24512000	28255000	74822000	23447000	33640000	4394000	0	9361400	16	14815000	Tb927.9.11600;Tb927.9.11580	Tb927.9.11600_unspecified product (gim5B) | location=Tb927_09_v5.1:1806052-1808712(+) | length=241 | sequence_SO=chromosome | SO=protein_coding;Tb927.9.11580_Gi
Tb927.10.4120	60S ribosomal protein L30	Ribosome	0	0	1	1	1	0.743	-0.9793	3.56	3.4775	6.8656	2	10	6	4	5	0	0	0	10	8	5	8402500	5931900	9093500	0	0	0	20179000	12174000	3263800	57758000	49625000	60440000	0	0	0	104660000	57572000	24209000	6	59045000	Tb927.10.4120;Tb927.10.4110	Tb927.10.4120_60S ribosomal protein L30 (RPL30) | location=Tb927_10_v5.1:1082682-1082999(-) | length=105 | sequence_SO=chromosome | SO=protein_coding;Tb927.10.4110 | organism=Trypanosoma_brucei_TREU927 | prod
Tb927.2.3880	HNRNPH/F	RNA.processing	0	0	1	1	1	1.65	0.963	3.54	4.112	3.9414	1	20	13	17	17	0	0	0	7	10	7	5448000	9040200	11366000	0	0	0	2049200	2613700	1279200	118000000	199470000	256570000	0	0	0	67239000	73670000	48168000	24	31796000	Tb927.2.3880	Tb927.2.3880_heterogeneous nuclear ribonucleoprotein H/F, putative (HNRNPH) | location=Tb927_02_v5.1:684803-686266(-) | length=487 | sequence_SO=chromosome | SO=protein_coding
Tb927.10.14180	TbSec13 Outer ring nucleoporin	Nuclear.transport	1	1	1	0	0	6.13	6.6381	3.46	4.0877	nd	1	12	11	7	11	0	0	0	1	0	1	11336000	2810400	5534900	0	0	0	81720	0	75177	172620000	67037000	75238000	0	0	0	0	0	0	16	19838000	Tb927.10.14180	Tb927.10.14180_protein transport protein SEC13, putative,cytosolic coat protein, putative | location=Tb927_10_v5.1:3444000-3445124(-) | length=374 | sequence_SO=chromosome | SO=protein_coding
Tb927.9.7260	phytanoyl-CoA dioxygenase (PhyH), putative	ZUnknown	1	1	1	0	0	5.21	3.6065	3.45	2.2867	nd	1	4	4	4	3	0	0	0	0	0	0	1513400	1207300	1156100	0	0	0	0	0	0	21614000	14994000	21543000	0	0	0	0	0	0	15	3876800	Tb927.9.7260	Tb927.9.7260_hypothetical protein, conserved | location=Tb927_09_v5.1:1176801-1177901(+) | length=366 | sequence_SO=chromosome | SO=protein_coding
Tb927.10.8430	40S ribosomal protein S12	Ribosome	0	0	1	1	1	1.74	-1.2191	3.4	3.9605	7.4108	1	11	7	4	5	0	0	0	6	7	8	9838800	4198200	5578500	0	0	0	7725700	8727700	8826500	92568000	44386000	54586000	0	0	0	76442000	66912000	67024000	9	44895000	Tb927.10.8430	Tb927.10.8430_40S ribosomal protein S12, putative | location=Tb927_10_v5.1:2092016-2092444(+) | length=142 | sequence_SO=chromosome | SO=protein_coding
Tb927.3.1370	40S ribosomal protein S25	Ribosome	0	0	1	1	1	0.559	-0.9023	3.34	4.4519	6.9289	2	8	3	4	4	0	0	0	8	7	2	14636000	11913000	15958000	0	0	0	30434000	18763000	3821900	68385000	58449000	65063000	0	0	0	133760000	81365000	33836000	5	95526000	Tb927.3.1370;Tb927.10.2840	Tb927.3.1370_40S ribosomal protein S25, putative | location=Tb927_03_v5.1:343637-343978(+) | length=113 | sequence_SO=chromosome | SO=protein_coding;Tb927.10.2840 | organism=Trypanosoma_brucei_TREU927 | produ
Tb927.10.12330	ZC3H34	RNA.binding	0	0	1	1	1	1.03	0.649	3.31	3.4816	5.1671	1	8	8	3	6	0	0	0	2	3	2	6244200	2642900	5006700	0	0	0	1198600	2207600	729730	58419000	32354000	48001000	0	0	0	20561000	25949000	13045000	11	18030000	Tb927.10.12330	Tb927.10.12330_zinc finger protein family member, putative (ZC3H34) | location=Tb927_10_v5.1:2992296-2992904(-) | length=202 | sequence_SO=chromosome | SO=protein_coding
Tb927.10.8170	TbNup144 Outer-inner connect	Nuclear.transport	0	0	0	0	0	2.07	4.1529	3.3	-6.1245	0	1	40	17	16	0	13	35	27	0	0	0	1065400	1217200	0	789700	3953500	2701600	0	0	0	76802000	82847000	0	65883000	199490000	129450000	0	0	0	57	9727500	Tb927.10.8170	Tb927.10.8170_nuclear pore complex protein (NUP155), putative,nucleoporin, putative | location=Tb927_10_v5.1:2027678-2031655(-) | length=1325 | sequence_SO=chromosome | SO=protein_coding
Tb927.11.11090	TbNup140 Nup76 complex, FG, symmetric, interact MEX67	Nuclear.transport	1	1	1	0	0	5.46	6.1984	3.26	3.986	nd	1	9	7	8	8	0	0	0	0	0	0	4481000	2383400	2769800	0	0	0	0	0	0	261760000	131670000	146090000	0	0	0	0	0	0	56	9634200	Tb927.11.11090	Tb927.11.11090_Nucleoporin (TbNup140) | location=Tb927_11_v5.1:2971402-2975796(+) | length=1464 | sequence_SO=chromosome | SO=protein_coding
Tb927.9.8720	fructose-1,6-bisphosphatase (FBPase)	Glucose.glycerol	0	1	1	1	1	3.77	3.5961	3.24	4.5946	5.6886	1	11	9	11	8	0	0	0	1	2	4	5902300	14672000	3548800	0	0	0	99851	295260	633460	92804000	192970000	59823000	0	0	0	0	5561200	12358000	15	25151000	Tb927.9.8720	Tb927.9.8720_fructose-1,6-bisphosphatase (FBPase) | location=Tb927_09_v5.1:1405055-1406107(-) | length=350 | sequence_SO=chromosome | SO=protein_coding
Tb927.4.3540	conserved, found in PRP19 pull-down	RNA.processing	0	0	1	1	1	0.204	0.2205	2.99	2.2861	1.8232	1	7	7	4	6	0	0	0	5	5	2	3024500	1411400	1781700	0	0	0	1146900	1847100	258370	47471000	30284000	29314000	0	0	0	19634000	32683000	11075000	18	9470000	Tb927.4.3540	Tb927.4.3540_hypothetical protein, conserved | location=Tb927_04_v5.1:910312-911456(-) | length=379 | sequence_SO=chromosome | SO=protein_coding
Tb927.11.9940	hypothetical protein, conserved	ZUnknown	1	1	1	0	0	5.86	4.353	2.99	3.2347	nd	1	7	5	3	5	0	0	0	0	0	0	3164700	1692900	2972700	0	0	0	0	0	0	29563000	15098000	25811000	0	0	0	0	0	0	9	7830300	Tb927.11.9940	Tb927.11.9940_hypothetical protein, conserved | location=Tb927_11_v5.1:2679883-2680443(+) | length=186 | sequence_SO=chromosome | SO=protein_coding
Tb927.10.14930	ZC3H39	RNA.binding	0	0	1	1	0	0.481	-0.6815	2.96	2.7478	nd	1	10	7	7	4	0	0	0	7	10	2	3580700	2394500	699630	0	0	0	2467700	4823500	352240	47841000	33673000	16695000	0	0	0	32977000	61311000	7958700	14	14318000	Tb927.10.14930	Tb927.10.14930_zinc finger protein family member, putative (ZC3H39) | location=Tb927_10_v5.1:3649025-3649882(+) | length=285 | sequence_SO=chromosome | SO=protein_coding
Tb927.11.14090	DRBD18	RNA.binding	1	1	1	0	0	9.17	12.3522	2.93	6.9332	nd	1	29	28	27	27	4	2	2	4	7	3	868810000	629210000	597250000	3451900	1299100	473670	299370	46269	0	15334000000	11848000000	10240000000	65613000	0	0	0	0	0	19	2100800000	Tb927.11.14090	Tb927.11.14090_hypothetical protein, conserved | location=Tb927_11_v5.1:3731214-3732656(+) | length=480 | sequence_SO=chromosome | SO=protein_coding
Tb927.11.14950	ZFP2	RNA.binding	1	1	1	0	0	3.15	5.411	2.92	4.023	nd	1	2	1	1	1	0	0	0	0	1	0	12140000	8588100	16891000	0	0	0	0	1706000	0	47965000	35082000	67431000	0	0	0	0	0	0	4	39325000	Tb927.11.14950	Tb927.11.14950_zinc finger protein 2 (ZFP2) | location=Tb927_11_v5.1:3977262-3977681(-) | length=139 | sequence_SO=chromosome | SO=protein_coding
Tb927.10.7910	MERS3 component of MERS complex	Mito.pathway	1	1	1	0	0	4.88	5.644	2.91	3.6383	nd	1	7	7	6	6	0	0	0	0	1	0	7770000	4940000	4942300	0	0	0	0	253840	0	84653000	56097000	53426000	0	0	0	0	0	0	11	17906000	Tb927.10.7910	Tb927.10.7910_hypothetical protein, conserved | location=Tb927_10_v5.1:1977775-1978344(-) | length=189 | sequence_SO=chromosome | SO=protein_coding
Tb927.7.800	REMC3 mitochondrial RNA binding complex 1 subunit (MRB800)	Mito.RNA	1	1	1	0	0	4.25	4.8325	2.89	2.4686	nd	1	11	11	6	8	0	0	0	0	0	0	2513500	1096800	1806600	0	0	0	0	0	0	55813000	37097000	47932000	0	0	0	0	0	0	26	5417000	Tb927.7.800	Tb927.7.800_mitochondrial RNA binding complex 1 subunit (MRB800) | location=Tb927_07_v5.1:181258-182889(-) | length=543 | sequence_SO=chromosome | SO=protein_coding
Tb927.1.700	phosphoglycerate kinase (PGKC)	Glucose.glycerol	0	0	1	1	0	0.0883	0.0523	2.84	4.0444	0.2633	2	33	29	30	22	0	2	9	23	21	19	26712000	32120000	16553000	0	97258	1612000	15504000	10805000	11744000	729990000	785650000	471250000	0	2845700	55474000	433460000	303370000	314950000	27	115150000	Tb927.1.700;Tb927.1.720	Tb927.1.700_phosphoglycerate kinase (PGKC) | location=Tb927_01_v5.1:231788-233110(-) | length=440 | sequence_SO=chromosome | SO=protein_coding
Tb927.3.3270	ATP-dependent phosphofructokinase (TbPFK)	Glucose.glycerol	0	0	1	1	1	0.341	-0.3051	2.84	3.8385	1.6651	1	39	29	37	27	0	6	8	28	32	25	26556000	71334000	14507000	0	342200	1202000	20558000	27720000	15893000	683090000	1707600000	416860000	0	9909900	32461000	500360000	717160000	385310000	25	178110000	Tb927.3.3270	Tb927.3.3270_ATP-dependent phosphofructokinase (TbPFK) | location=Tb927_03_v5.1:839799-841262(-) | length=487 | sequence_SO=chromosome | SO=protein_coding
Tb927.11.16860	mitochondrial RNA binding protein (MRB8620)	Mito.RNA	1	1	1	0	0	6.68	6.631	2.83	3.603	nd	1	20	18	13	15	0	0	0	0	0	0	4646100	2449400	3475700	0	0	0	0	0	0	121550000	73834000	100610000	0	0	0	0	0	0	28	10571000	Tb927.11.16860	Tb927.11.16860_mitochondrial RNA binding protein (MRB8620) | location=Tb927_11_v5.1:4491811-4493259(-) | length=482 | sequence_SO=chromosome | SO=protein_coding
Tb927.11.10910	40S ribosomal protein SA	Ribosome	0	0	1	1	1	1.19	-1.544	2.82	3.1561	7.1287	2	7	3	4	4	0	0	0	3	3	7	1207900	4106800	4951000	0	0	0	4140700	2131000	12766000	25899000	82619000	54682000	0	0	0	63205000	32607000	151240000	14	29304000	Tb927.11.10910;Tb927.11.10790	Tb927.11.10910_40S ribosomal protein SA, putative | location=Tb927_11_v5.1:2911268-2912002(+) | length=244 | sequence_SO=chromosome | SO=protein_coding;Tb927.11.10790 | organism=Trypanosoma_brucei_TREU927 | p
Tb927.10.10590	histone H2B	Chromatin	0	0	1	1	1	0.33	-0.4488	2.75	2.7797	4.2816	14	5	3	4	2	0	1	0	2	3	5	2642100	7128200	1764100	0	0	0	1549500	1508600	4237700	19313000	45070000	22827000	0	0	0	19154000	19286000	24991000	8	18830000	Tb927.10.10590;Tb927.10.10580;Tb927.10.10570;Tb927.10.10560;Tb927.10.10550;Tb927.10.10540;Tb927.10.10530;Tb927.10.10520;Tb927.10.10510;Tb927.10.10500;Tb927.10.10490;Tb927.10.10480;Tb927.10.10470;Tb927.10.10460	Tb927.10.10590_histone H2B, putative | location=Tb927_10_v5.1:2584533-2584871(-) | length=112 | sequence_SO=chromosome | SO=protein_coding;Tb927.10.10580_histon
Tb927.10.10700	splicing factor Prp31	RNA.processing	0	0	1	1	1	0.829	-0.7221	2.71	2.5003	3.8143	1	8	5	4	3	0	0	0	7	7	2	2660500	1727600	772030	0	0	0	1868100	2861300	400790	43671000	30082000	15447000	0	0	0	30172000	43630000	11932000	17	10290000	Tb927.10.10700	Tb927.10.10700_splicing factor Prp31 | location=Tb927_10_v5.1:2600742-2601809(-) | length=355 | sequence_SO=chromosome | SO=protein_coding
Tb927.11.280	hypothetical protein, conserved, no domains	ZUnknown	0	0	1	1	1	0.279	0.5487	2.69	2.8825	3.8739	1	12	7	6	7	0	0	0	5	8	1	1631500	1523300	1374400	0	0	0	1132300	1763500	390040	53022000	40009000	43972000	0	0	0	34957000	35939000	0	28	7815000	Tb927.11.280	Tb927.11.280_hypothetical protein, conserved | location=Tb927_11_v5.1:64000-65946(-) | length=648 | sequence_SO=chromosome | SO=protein_coding
Tb927.6.4980	40S ribosomal protein S14	Ribosome	0	0	1	1	1	0.522	-0.6327	2.61	3.6847	4.5678	3	8	5	4	6	0	1	0	6	4	6	10662000	7033300	12289000	0	181640	0	11981000	7900900	6395600	69323000	53805000	81672000	0	0	0	53191000	51718000	59594000	7	56444000	Tb927.6.4980;Tb11.0390;Tb11.0290	Tb927.6.4980_40S ribosomal protein S14 (RPS14) | location=Tb927_06_v5.1:1370202-1370673(+) | length=144 | sequence_SO=chromosome | SO=protein_coding;Tb11.0390_4
Tb927.10.11870	GRBC5 mitochondrial RNA binding protein (MRB11870)	Mito.RNA	1	1	1	0	0	5.4	4.6429	2.59	1.9164	nd	1	9	6	6	7	0	0	0	0	0	0	1263700	1573100	2771500	0	0	0	0	0	0	29784000	25868000	34079000	0	0	0	0	0	0	16	5608200	Tb927.10.11870	Tb927.10.11870_mitochondrial RNA binding protein (MRB11870) | location=Tb927_10_v5.1:2898295-2899227(+) | length=310 | sequence_SO=chromosome | SO=protein_coding
Tb11.v5.0199	universal minicircle sequence binding protein, putative	Mito.DNA	1	1	1	0	0	4.48	4.4211	2.57	2.0404	nd	3	7	6	5	6	0	0	0	0	0	0	3597800	1018700	1568900	0	0	0	0	0	0	40535000	18124000	24590000	0	0	0	0	0	0	15	6185400	Tb11.v5.0199;Tb927.10.6060;Tb927.10.6070	Tb11.v5.0199_universal minicircle sequence binding protein, putative | location=Tb927_11_bin_v5.1:298828-299469(-) | length=213 | sequence_SO=random_sequence | SO=protein_coding;Tb927.10.6060 | organism=Trypa
Tb927.5.2140	UPF1	RNA.degradation	0	0	1	1	1	0.304	0.4314	2.56	3.1816	6.6481	1	22	16	17	7	0	0	0	10	9	4	1932300	1509100	579690	0	0	0	644220	506750	222650	78607000	60593000	36796000	0	0	0	37443000	29275000	16229000	48	5394700	Tb927.5.2140	Tb927.5.2140_regulator of nonsense transcripts UPF1 | location=Tb927_05_v5.1:732744-735318(-) | length=842 | sequence_SO=chromosome | SO=protein_coding
Tb927.11.9720	40S ribosomal protein S27	Ribosome	0	0	1	1	1	0.407	-0.6695	2.52	2.7407	3.826	1	5	4	4	5	0	0	1	4	3	3	4830600	5584600	8361100	0	0	252270	5959000	2985500	7083600	27130000	30001000	33535000	0	0	0	30199000	17656000	35500000	5	35057000	Tb927.11.9720	Tb927.11.9720_40S ribosomal protein S27, putative | location=Tb927_11_v5.1:2634082-2634342(-) | length=86 | sequence_SO=chromosome | SO=protein_coding
Tb927.6.2140	hypothetical protein, conserved	Mito.RNA	1	1	1	0	0	3.95	4.2714	2.38	2.375	nd	1	7	5	4	5	0	0	0	0	1	0	2002800	2225200	2183800	0	0	0	0	152860	0	28091000	28380000	33294000	0	0	0	0	0	0	14	6564600	Tb927.6.2140	Tb927.6.2140_hypothetical protein, conserved | location=Tb927_06_v5.1:682282-683085(-) | length=267 | sequence_SO=chromosome | SO=protein_coding
Tb927.11.3380	RanBP1 Ran-binding protein 1	Nuclear.transport	1	1	1	0	0	6	4.7756	2.29	2.5218	nd	1	4	4	4	4	0	0	0	0	0	0	2503800	2032700	2303100	0	0	0	0	0	0	28164000	19862000	27209000	0	0	0	0	0	0	11	6839600	Tb927.11.3380	Tb927.11.3380_Ran-binding protein 1, putative | location=Tb927_11_v5.1:991911-992384(+) | length=157 | sequence_SO=chromosome | SO=protein_coding
Tb927.10.10850	AGO1	RNA.degradation	0	0	1	1	1	0.151	-0.2403	2.2	2.0469	6.3967	1	21	17	13	9	0	0	0	8	11	4	1210000	1065500	582380	0	0	0	567960	789740	254810	60098000	48507000	37490000	0	0	0	39698000	45665000	23355000	57	4470400	Tb927.10.10850	Tb927.10.10850_argonaute-like protein (AGO1) | location=Tb927_10_v5.1:2634956-2637667(-) | length=903 | sequence_SO=chromosome | SO=protein_coding
Tb927.7.6090	eIF3a	Translation	0	0	1	0	0	0.655	-0.866	2.15	-2.7736	nd	1	7	3	3	2	0	0	0	0	1	1	201960	186840	89514	0	0	0	0	40855	0	0	6913100	0	0	0	0	0	0	0	37	519170	Tb927.7.6090	Tb927.7.6090_hypothetical protein, conserved | location=Tb927_07_v5.1:1659147-1662227(-) | length=762 | sequence_SO=chromosome | SO=protein_coding
Tb927.4.1310	ZC3H9	RNA.binding	0	0	1	1	1	0.332	0.3605	2.14	2.5197	5.0528	1	10	10	6	10	0	0	0	4	9	2	3014700	1517800	2403600	0	0	0	857210	2250100	314620	59791000	33831000	50197000	0	0	0	31353000	44120000	8585100	22	10358000	Tb927.4.1310	Tb927.4.1310_ZFP family member, putative (ZC3H9) | location=Tb927_04_v5.1:343255-344508(-) | length=416 | sequence_SO=chromosome | SO=protein_coding
Tb927.9.5320	nucleolar RNA binding protein, putative (28G16.220)	rRNA.tRNA.process	0	0	1	1	1	1.53	0.7719	2.13	2.6441	5.7177	1	15	9	13	4	0	0	0	5	7	5	2705400	3456300	1023600	0	0	0	504650	829550	388870	50129000	59809000	26250000	0	0	0	16270000	19801000	14815000	21	8908300	Tb927.9.5320	Tb927.9.5320_nucleolar RNA binding protein, putative | location=Tb927_09_v5.1:929806-931089(+) | length=427 | sequence_SO=chromosome | SO=protein_coding
Tb927.9.11410	60S ribosomal protein L23	Ribosome	0	0	1	1	1	0.541	-0.7832	2.12	2.9539	4.5277	2	7	4	2	5	0	0	0	6	4	4	5116600	973200	11359000	0	0	0	8202100	2185500	3296200	47142000	33965000	54621000	0	0	0	48876000	26237000	38218000	8	31132000	Tb927.9.11410;Tb927.9.11380	Tb927.9.11410_unspecified product | location=Tb927_09_v5.1:1789175-1789594(+) | length=139 | sequence_SO=chromosome | SO=protein_coding;Tb927.9.11380_unspecifie
Tb927.11.5440	malic enzyme	Mito.pathway	0	0	0	0	0	2.57	2.1972	2.1	-2.9557	nd	1	15	6	3	4	0	9	11	2	2	2	1361800	414600	523540	0	1208700	2715700	239490	27856	180750	36553000	18504000	17580000	0	33450000	61972000	0	0	0	27	6672500	Tb927.11.5440	Tb927.11.5440_malic enzyme | location=Tb927_11_v5.1:1546913-1548607(+) | length=564 | sequence_SO=chromosome | SO=protein_coding
Tb927.11.6300	40S ribosomal protein S5	Ribosome	0	0	1	1	1	0.161	-0.296	2.01	2.3706	5.245	1	8	7	4	6	0	1	1	5	2	6	20405000	4995200	6475500	0	337940	484790	5866000	1571900	11099000	156950000	31975000	69999000	0	0	0	65586000	30354000	98855000	9	51235000	Tb927.11.6300	Tb927.11.6300_40S ribosomal protein S5, putative | location=Tb927_11_v5.1:1772246-1772818(-) | length=190 | sequence_SO=chromosome | SO=protein_coding
Tb927.10.2320	TbNup41 Outer ring	Nuclear.transport	1	1	1	0	0	4.4	4.9298	2	2.5482	nd	1	8	6	4	6	0	0	0	0	0	0	2858500	1070600	1773400	0	0	0	0	0	0	50346000	17488000	29109000	0	0	0	0	0	0	17	5702500	Tb927.10.2320	Tb927.10.2320_hypothetical protein, conserved | location=Tb927_10_v5.1:599823-600968(+) | length=381 | sequence_SO=chromosome | SO=protein_coding
Tb927.2.1860	REMC2 mitochondrial RNA binding complex 1 subunit (MRB1860)	Mito.RNA	1	1	1	0	0	5.64	4.7289	1.98	2.2913	nd	1	19	12	11	13	0	0	0	0	0	0	1468800	1161200	1349400	0	0	0	0	0	0	67326000	50099000	69607000	0	0	0	0	0	0	47	3979400	Tb927.2.1860	Tb927.2.1860_mitochondrial RNA binding complex 1 subunit (MRB1860) | location=Tb927_02_v5.1:347030-349648(+) | length=872 | sequence_SO=chromosome | SO=protein_coding
Tb927.11.11790	R3H domain containing protein, putative	ZUnknown	0	0	1	0	1	0.428	0.6854	1.97	2.2874	3.608	1	13	9	7	5	0	0	0	7	10	0	1537300	998270	696680	0	0	0	675850	952610	0	35967000	28613000	27577000	0	0	0	20268000	23676000	0	28	4860700	Tb927.11.11790	Tb927.11.11790_hypothetical protein, conserved | location=Tb927_11_v5.1:3163236-3164897(+) | length=553 | sequence_SO=chromosome | SO=protein_coding
Tb927.8.3750	NOP56	rRNA.tRNA.process	0	0	1	1	1	1.65	1.3929	1.93	2.0567	5.1951	1	11	7	9	7	0	0	0	2	6	1	1348700	1584200	915500	0	0	0	230580	557310	164920	37685000	41941000	18764000	0	0	0	11376000	15413000	0	27	4801200	Tb927.8.3750	Tb927.8.3750_nucleolar protein, putative | location=Tb927_08_v5.1:1120185-1121636(-) | length=483 | sequence_SO=chromosome | SO=protein_coding
Tb927.10.11390	60S ribosomal protein L6	Ribosome	0	0	1	1	1	0.132	-0.4724	1.9	4.3059	8.5468	1	14	2	14	14	0	0	0	10	5	6	601350	27991000	19593000	0	0	0	12493000	1983600	4271100	8642100	302970000	208960000	0	0	0	142320000	27576000	45785000	11	66933000	Tb927.10.11390	Tb927.10.11390_60S ribosomal protein L6, putative | location=Tb927_10_v5.1:2777404-2777982(+) | length=192 | sequence_SO=chromosome | SO=protein_coding
Tb927.10.10130	REMC1 mitochondrial RNA binding complex 1 subunit (MRB10130)	Mito.RNA	0	0	0	0	0	5.23	5.2384	1.89	2.0765	nd	1	11	9	7	8	0	2	1	0	0	0	2223700	2023900	2587200	0	72502	44755	0	0	0	51810000	48129000	63500000	0	1809800	0	0	0	0	25	6952000	Tb927.10.10130	Tb927.10.10130_mitochondrial RNA binding complex 1 subunit (MRB10130) | location=Tb927_10_v5.1:2495034-2496671(+) | length=545 | sequence_SO=chromosome | SO=protein_coding
Tb927.4.4160	REMC5 mitochondrial RNA binding protein MRB4160 MRB complex component	Mito.RNA	1	1	1	0	0	5.18	5.4245	1.88	2.8858	nd	1	30	16	10	15	0	0	0	0	1	0	1976200	809330	2006600	0	0	0	0	0	0	104870000	43089000	86856000	0	0	0	0	0	0	49	4792100	Tb927.4.4160	Tb927.4.4160_mitochondrial RNA binding protein (MRB4160) | location=Tb927_04_v5.1:1100829-1103576(-) | length=915 | sequence_SO=chromosome | SO=protein_coding
Tb927.5.1340	component of PRP19 complex, putative	RNA.processing	0	0	1	0	1	2.76	-2.9646	1.85	-2.3489	3.5817	2	9	5	2	1	0	0	0	5	4	0	53106	64283	40268	0	0	0	205340	188290	0	0	0	0	0	0	0	9398700	8708300	0	46	551290	Tb927.5.1340;Tb11.v5.0884	Tb927.5.1340_hypothetical protein, conserved | location=Tb927_05_v5.1:493694-496156(+) | length=820 | sequence_SO=chromosome | SO=protein_coding
Tb927.5.3810	orotidine-5-phosphate decarboxylase/orotate phosphoribosyltransferase, OMPDCase-OPRTase	Nucleotides	0	0	0	0	0	2.9	2.7908	1.81	-2.6194	-4.1254	1	12	5	9	2	0	5	7	0	0	0	791660	1086900	205270	0	683710	980040	0	0	0	17706000	18700000	9839900	0	15519000	20682000	0	0	0	22	3747600	Tb927.5.3810	Tb927.5.3810_orotidine-5-phosphate decarboxylase/orotate phosphoribosyltransferase, putative,OMPDCase-OPRTase, putative | location=Tb927_05_v5.1:1246263-1247652(+) | length=458 | sequence_SO=chromosome | SO=p
Tb927.11.4300	60S ribosomal protein L18	Ribosome	0	0	1	1	1	2.04	-3.2423	1.68	2.7732	4.5715	2	11	10	4	2	0	0	0	7	9	9	20125000	3183700	534860	0	0	0	10278000	24048000	20681000	139620000	28466000	4583000	0	0	0	71564000	156150000	148320000	7	78850000	Tb927.11.4300;Tb927.10.9880	Tb927.11.4300_60S ribosomal protein L18, putative (RPL18) | location=Tb927_11_v5.1:1253829-1254410(-) | length=193 | sequence_SO=chromosome | SO=protein_coding;Tb927.10.9880 | organism=Trypanosoma_brucei_TREU
Tb927.6.1680	Mitochondrial tRNA import	Mito.biogenesis	1	1	1	0	0	4.24	4.613	1.6	2.0288	nd	1	14	7	11	13	0	0	0	0	0	0	777030	1641600	1986200	0	0	0	0	0	0	39636000	43582000	53332000	0	0	0	0	0	0	31	4404800	Tb927.6.1680	Tb927.6.1680_mitochondrial RNA binding protein 1 (MRB1680) | location=Tb927_06_v5.1:567733-569307(-) | length=524 | sequence_SO=chromosome | SO=protein_coding
Tb927.10.2900	importin beta-1 subunit, putative	Nuclear.transport	1	1	1	0	0	5.6	4.6406	1.58	2.1698	nd	2	9	9	4	5	0	0	0	0	0	0	1663300	573510	699460	0	0	0	0	0	0	42471000	30611000	26752000	0	0	0	0	0	0	34	2936300	Tb927.10.2900;Tb11.v5.0837	Tb927.10.2900_importin beta-1 subunit, putative | location=Tb927_10_v5.1:748683-751283(+) | length=866 | sequence_SO=chromosome | SO=protein_coding;Tb11.v5.0837 | organism=Trypanosoma_brucei_TREU927 | product
Tb927.4.750	50S ribosomal protein L7Ae, putative	Mito.translation	1	1	1	0	0	2.49	3.3081	1.53	2.1698	nd	1	3	2	2	1	0	0	0	1	1	0	3077600	3113200	1366600	0	0	0	508240	136230	0	14626000	15020000	8141700	0	0	0	0	0	0	5	8201900	Tb927.4.750	Tb927.4.750_50S ribosomal protein L7Ae, putative | location=Tb927_04_v5.1:207302-207739(-) | length=145 | sequence_SO=chromosome | SO=protein_coding
Tb927.9.5150	SNU13 homologue. mRNA spliciing and ribosome biogenesis	RNA.processing	0	1	1	0	1	1.93	2.225	1.5	2.4371	3.9393	1	2	2	2	2	0	0	0	2	1	0	3019500	2924600	3571600	0	0	0	418700	664910	0	21180000	19399000	19037000	0	0	0	3797400	10783000	0	7	10599000	Tb927.9.5150	Tb927.9.5150_ribosomal protein S6, putative,NHP2/RS6-like protein (NHP2) | location=Tb927_09_v5.1:912912-913292(+) | length=126 | sequence_SO=chromosome | SO=protein_coding
Tb927.11.14020	RNA-binding protein (NRBD2)	Ribosome	0	0	1	1	1	0.739	-2.0895	1.49	3.589	7.5776	2	13	2	11	8	0	0	0	11	6	10	373730	13086000	13774000	0	0	0	11724000	2962200	14582000	5540400	168990000	185080000	0	0	0	145680000	42406000	186840000	13	56502000	Tb927.11.14020;Tb927.11.14000	Tb927.11.14020_RNA-binding protein (NRBD2) | location=Tb927_11_v5.1:3711538-3712377(+) | length=279 | sequence_SO=chromosome | SO=protein_coding;Tb927.11.14000_
Tb927.10.170	pseudouridine synthase, Cbf5p	rRNA.tRNA.process	0	0	1	1	1	0.0689	-0.0683	1.48	1.9389	4.9497	1	14	6	12	3	0	0	0	4	6	4	1450800	2353900	617100	0	0	0	649450	981290	421240	34230000	48354000	16726000	0	0	0	19579000	24165000	12316000	24	6473800	Tb927.10.170	Tb927.10.170_pseudouridine synthase, Cbf5p | location=Tb927_10_v5.1:70843-72126(+) | length=427 | sequence_SO=chromosome | SO=protein_coding
Tb927.11.10260	hypothetical protein, conserved, no known domains	ZUnknown	0	0	0	0	0	4.19	3.3852	1.45	-2.1418	0.2863	1	10	7	4	2	0	4	9	1	1	0	1597000	656460	282800	0	450360	2187900	41418	45989	0	32126000	19191000	10361000	0	8989800	32824000	0	0	0	20	5262000	Tb927.11.10260	Tb927.11.10260_hypothetical protein, conserved | location=Tb927_11_v5.1:2740794-2742218(+) | length=474 | sequence_SO=chromosome | SO=protein_coding
Tb927.10.8980	hypothetical protein, conserved	Mito.pathway	1	1	1	0	0	3.47	3.9434	1.38	2.1639	nd	1	4	3	4	2	0	0	0	0	0	0	2263200	5352400	760210	0	0	0	0	0	0	14834000	33884000	9912700	0	0	0	0	0	0	7	8375900	Tb927.10.8980	Tb927.10.8980_hypothetical protein, conserved | location=Tb927_10_v5.1:2227157-2227666(+) | length=169 | sequence_SO=chromosome | SO=protein_coding
Tb927.11.10750	Pre-mRNA-splicing factor CWC22, putative	RNA.processing	0	0	1	1	1	2.32	-3.1968	1.31	2.0657	2.7892	1	11	6	6	4	0	0	0	8	10	2	661500	688690	304730	0	0	0	10665000	5622700	5640700	110310000	106800000	75876000	0	0	0	115530000	147430000	104400000	28	23583000	Tb927.11.10750	Tb927.11.10750_Pre-mRNA-splicing factor CWC22, putative (TbCWC22) | location=Tb927_11_v5.1:2877630-2879375(+) | length=581 | sequence_SO=chromosome | SO=protein_coding
Tb927.5.4260	histone H4	Chromatin	0	0	1	1	1	0.155	0.3561	1.25	2.3671	3.7457	11	4	3	3	3	0	0	0	2	2	1	2368300	6285400	2362100	0	0	0	2097600	1415200	894380	11947000	20872000	7537900	0	0	0	10015000	7742500	0	4	15423000	Tb927.5.4260;Tb927.5.4250;Tb927.5.4240;Tb927.5.4230;Tb927.5.4220;Tb927.5.4210;Tb927.5.4200;Tb927.5.4190;Tb927.5.4180;Tb927.5.4170;Tb927.2.2670	Tb927.5.4260_histone H4, putative | location=Tb927_05_v5.1:1334564-1334866(-) | length=100 | sequence_SO=chromosome | SO=protein_coding;Tb927.5.4250_histone H4,
Tb927.7.2940	histone H2A	Chromatin	0	0	1	1	0	0.241	0.7988	1.2	2.582	nd	13	3	2	3	1	0	0	0	1	3	1	5155700	13709000	2315300	0	0	0	1630500	3364400	1108200	35092000	78483000	0	0	0	0	0	19797000	0	6	27283000	Tb927.7.2940;Tb927.7.2930;Tb927.7.2920;Tb927.7.2910;Tb927.7.2900;Tb927.7.2890;Tb927.7.2880;Tb927.7.2870;Tb927.7.2860;Tb927.7.2850;Tb927.7.2840;Tb927.7.2830;Tb927.7.2820	Tb927.7.2940_histone H2A, putative | location=Tb927_07_v5.1:739886-740297(+) | length=134 | sequence_SO=chromosome | SO=protein_coding;Tb927.7.2930_histone H2A,
Tb927.9.6070	40S ribosomal protein S3	Ribosome	0	0	1	1	1	1.17	-2.0596	1.2	1.5883	5.5447	2	13	3	5	4	0	0	0	4	3	12	1218300	2246500	2289000	0	0	0	3513700	867080	23430000	18180000	30690000	28858000	0	0	0	44024000	12541000	247540000	12	33564000	Tb927.9.6070;Tb927.10.11540	Tb927.9.6070_40S ribosomal protein S3, putative (RPS3) | location=Tb927_09_v5.1:1008372-1009016(+) | length=214 | sequence_SO=chromosome | SO=protein_coding;Tb927.10.11540 | organism=Trypanosoma_brucei_TREU92
Tb927.9.15090	cytosolic coat protein, putative	Vesicular.transport	0	0	1	1	1	3.73	-4.7725	1.2	-1.8712	4.3427	1	9	1	2	1	0	0	0	8	5	2	193940	295050	92646	0	0	0	4113800	1191200	476970	0	5602800	0	0	0	0	41880000	18072000	9532200	13	6363600	Tb927.9.15090	Tb927.9.15090_cytosolic coat protein, putative | location=Tb927_09_v5.1:2356154-2356813(+) | length=219 | sequence_SO=chromosome | SO=protein_coding
Tb927.11.14750	PSP1 C-terminal conserved region, putative	ZUnknown	1	1	1	0	0	0.469	0.6133	1.16	-1.3454	nd	1	4	2	1	2	0	0	0	0	0	0	356130	172660	385790	0	0	0	0	0	0	6410400	0	0	0	0	0	0	0	0	18	914590	Tb927.11.14750	Tb927.11.14750_hypothetical protein, conserved | location=Tb927_11_v5.1:3922759-3923877(-) | length=372 | sequence_SO=chromosome | SO=protein_coding
Tb927.9.13920	kinetoplastid membrane protein KMP-11	Membrane.protein	0	0	0	0	0	1.86	4.29	1.12	2.7637	nd	3	6	3	4	4	0	0	1	0	2	0	7326200	2230600	8142200	0	0	0	0	427500	0	62867000	0	45412000	0	0	0	0	0	0	7	18126000	Tb927.9.13920;Tb927.9.13880;Tb927.9.13820	Tb927.9.13920_kinetoplastid membrane protein KMP-11 (KMP-11) | location=Tb927_09_v5.1:2180778-2181056(-) | length=92 | sequence_SO=chromosome | SO=protein_coding;Tb927.9.13880 | organism=Trypanosoma_brucei_TR
Tb927.10.9970	hypothetical protein, conserved	Mito.pathway	1	1	1	0	0	3.72	3.277	1.12	1.8216	nd	1	12	8	7	10	0	0	0	0	0	0	583850	542780	900000	0	0	0	0	0	0	31391000	31719000	38222000	0	0	0	0	0	0	50	2026600	Tb927.10.9970	Tb927.10.9970_hypothetical protein, conserved | location=Tb927_10_v5.1:2460038-2463112(+) | length=1024 | sequence_SO=chromosome | SO=protein_coding
Tb927.3.3580	lipophosphoglycan biosynthetic protein, putative (LPG3)=GRP94 ER chaperone	Glycans	0	0	1	0	0	0.286	0.6316	1.11	-2.1033	nd	1	3	3	2	1	0	0	0	0	0	1	237690	133160	72591	0	0	0	0	0	58335	8251900	5469400	0	0	0	0	0	0	0	37	501770	Tb927.3.3580	Tb927.3.3580_lipophosphoglycan biosynthetic protein, putative (LPG3) | location=Tb927_03_v5.1:1006678-1008999(+) | length=773 | sequence_SO=chromosome | SO=protein_coding
Tb927.10.7280	pre-mRNA splicing factor ATP-dependent RNA helicase, putative	RNA.processing	0	0	1	1	1	1.1	-1.7578	1.1	-1.3846	1.429	2	10	1	5	2	0	0	0	5	7	1	21320	158750	56851	0	0	0	127300	190270	17749	0	0	5809000	0	0	0	7532900	10621000	0	64	572240	Tb927.10.7280;Tb927.5.1150	Tb927.10.7280_pre-mRNA splicing factor ATP-dependent RNA helicase, putative,RNA helicase, putative | location=Tb927_10_v5.1:1833351-1836539(-) | length=1062 | sequence_SO=chromosome | SO=protein_coding
Tb927.11.4450	ALBA2	RNA.binding	0	0	1	1	0	1.02	-1.0447	1.05	1.6395	nd	1	6	2	2	2	0	0	0	6	5	3	2217300	2231000	1821000	0	0	0	4754300	3759400	1205800	19928000	18931000	17468000	0	0	0	26917000	20345000	8334100	7	15989000	Tb927.11.4450	Tb927.11.4450_ALBA-Domain Protein (ALBA2) | location=Tb927_11_v5.1:1291970-1292323(+) | length=117 | sequence_SO=chromosome | SO=protein_coding
Tb927.11.13050	calmodulin	Calcium	0	0	0	0	0	1.67	4.4455	1.04	2.0145	-9.4426	4	12	9	10	12	3	6	4	4	9	3	2111500	9361300	35352000	0	658530	125000	0	5941800	0	33599000	99532000	285670000	0	12898000	0	0	42007000	0	9	53550000	Tb927.11.13050;Tb927.11.13040;Tb927.11.13030;Tb927.11.13020	Tb927.11.13050_calmodulin | location=Tb927_11_v5.1:3487807-3488256(-) | length=149 | sequence_SO=chromosome | SO=protein_coding;Tb927.11.13040_calmodulin | loca
Tb927.10.2020	hexokinase (HK2)	Glucose.glycerol	0	0	0	0	0	2.16	1.6402	0.958	1.0641	-3.2787	1	19	19	14	13	0	1	6	3	3	7	4931300	1884900	2441600	0	68400	463610	324600	267310	732380	130800000	41504000	56914000	0	0	19554000	10775000	9833400	28847000	27	11114000	Tb927.10.2020	Tb927.10.2020_hexokinase (HK2) | location=Tb927_10_v5.1:529818-531233(+) | length=471 | sequence_SO=chromosome | SO=protein_coding
Tb927.10.8230	protein disulfide isomerase,ERp57-like, cofactor wth calnexin, putative	Chaperone	0	0	0	0	0	1.66	2.959	0.928	1.8593	-1.8444	2	12	9	7	10	0	0	6	2	1	7	3933000	1460700	3389300	0	0	1020000	41207	180680	1336800	110400000	50224000	82388000	0	0	36800000	0	0	43239000	29	11362000	Tb927.10.8230;Tb11.v5.0668	Tb927.10.8230_protein disulfide isomerase,bloodstream- specific protein 2 precursor | location=Tb927_10_v5.1:2043014-2044507(-) | length=497 | sequence_SO=chromosome | SO=protein_coding;Tb11.v5.0668 | organis
Tb927.7.5760	MTR2/p15	Nuclear.transport	1	1	1	0	0	3.52	4.0564	0.915	1.7837	nd	1	3	3	2	1	0	0	0	0	0	0	4675500	2849700	723280	0	0	0	0	0	0	19559000	18067000	0	0	0	0	0	0	0	5	8248500	Tb927.7.5760	Tb927.7.5760_nuclear transport factor 2 protein, putative (NFT2) | location=Tb927_07_v5.1:1554226-1554633(+) | length=135 | sequence_SO=chromosome | SO=protein_coding
Tb927.11.7380	glycerol-3-phosphate dehydrogenase (FAD-dependent), mitochondrial, TAO complex	Glucose.glycerol	0	0	0	0	0	2.77	2.7148	0.899	-1.2355	nd	1	9	7	4	2	0	1	6	0	0	0	771660	360100	114350	0	56518	395690	0	0	0	22904000	12693000	7883400	0	0	12341000	0	0	0	34	1698300	Tb927.11.7380	Tb927.11.7380_glycerol-3-phosphate dehydrogenase (FAD-dependent), mitochondrial | location=Tb927_11_v5.1:2077880-2079691(+) | length=603 | sequence_SO=chromosome | SO=protein_coding
Tb927.10.7500	fibrillarin (NOP1)	rRNA.tRNA.process	0	1	1	0	1	6.25	2.607	0.852	1.2879	4.2489	1	5	5	4	3	0	0	0	1	1	0	1044600	953700	677050	0	0	0	56294	132830	0	13109000	17626000	12071000	0	0	0	0	0	0	16	2864500	Tb927.10.7500	Tb927.10.7500_fibrillarin (NOP1) | location=Tb927_10_v5.1:1884555-1885457(-) | length=300 | sequence_SO=chromosome | SO=protein_coding
Tb927.6.4440	RBP42	RNA.binding	0	0	1	1	1	1.52	-0.8907	0.851	1.4489	2.191	1	4	4	3	1	0	0	0	3	3	1	1635500	1215100	404770	0	0	0	1032200	1267800	435030	15175000	13628000	10833000	0	0	0	12553000	14247000	11439000	13	5990300	Tb927.6.4440	Tb927.6.4440_hypothetical protein, conserved | location=Tb927_06_v5.1:1246165-1247223(-) | length=352 | sequence_SO=chromosome | SO=protein_coding
Tb927.5.3250	hypothetical protein, conserved, no clear yeast or human matches	ZUnknown	1	1	1	0	0	2.57	2.9006	0.839	1.2527	nd	1	9	5	4	9	0	0	0	0	0	1	428930	245600	621160	0	0	0	0	0	6983.3	26801000	20390000	29255000	0	0	0	0	0	0	59	1302700	Tb927.5.3250	Tb927.5.3250_hypothetical protein, conserved | location=Tb927_05_v5.1:1068696-1073369(-) | length=1557 | sequence_SO=chromosome | SO=protein_coding
Tb927.7.2650	CAP51V	Cytoskeleton	0	0	0	0	0	0.569	0.8605	0.773	-1.589	nd	2	2	2	2	2	0	0	1	0	0	1	297130	133810	155380	0	0	31876	0	0	46134	8284400	3959400	4759500	0	0	0	0	0	0	29	664330	Tb927.7.2650;Tb927.7.2640	Tb927.7.2650_hypothetical protein, conserved | location=Tb927_07_v5.1:678884-680497(-) | length=537 | sequence_SO=chromosome | SO=protein_coding;Tb927.7.2640_hy
Tb927.6.4340	U2 SSm2-1/Sm15K, EmD3 paralogue in U2 Sm core (not Lsm5)	RNA.processing	0	0	1	1	1	0.14	-0.4107	0.762	1.7058	3.561	1	3	2	2	2	0	0	0	2	3	1	2245400	1507600	1417700	0	0	0	1777300	2656300	182700	17557000	0	10497000	0	0	0	13045000	15577000	0	7	9786900	Tb927.6.4340	Tb927.6.4340_U6 snRNA-associated Sm-like protein LSm5p (TbLSm5) | location=Tb927_06_v5.1:1225938-1226291(-) | length=117 | sequence_SO=chromosome | SO=protein_coding
Tb927.8.4820	eIF4G3	Translation	0	0	1	1	1	1.92	-1.6398	0.646	1.0847	7.2008	2	16	10	4	5	0	0	0	11	13	7	1551900	357070	491970	0	0	0	1660100	1713200	450720	41785000	16666000	22052000	0	0	0	47582000	46288000	18601000	31	6225000	Tb927.8.4820;Tb11.v5.0659	Tb927.8.4820_eukaryotic translation initation factor 4 gamma, putative | location=Tb927_08_v5.1:1422184-1424052(-) | length=622 | sequence_SO=chromosome | SO=protein_coding;Tb11.v5.0659 | organism=Trypanosoma
Tb927.10.2010	hexokinase (HK1)	Glucose.glycerol	0	0	0	0	0	2.45	2.1402	0.599	-0.7046	nd	1	19	2	2	2	0	0	2	0	0	1	590830	275880	457040	0	0	236350	0	0	104820	15593000	7749500	12284000	0	0	6495700	0	0	0	27	1664900	Tb927.10.2010	Tb927.10.2010_hexokinase (HK1) | location=Tb927_10_v5.1:526772-528187(+) | length=471 | sequence_SO=chromosome | SO=protein_coding
Tb927.6.1870	eIF4E4	Translation	0	0	1	1	1	1.15	-1.5585	0.535	1.0461	8.1946	1	10	9	2	3	0	0	0	6	7	3	1560200	164070	417510	0	0	0	1191700	1135000	351730	36136000	6127400	17216000	0	0	0	20246000	23244000	7894800	23	4820200	Tb927.6.1870	Tb927.6.1870_eukaryotic translation initiation factor 4e, putative | location=Tb927_06_v5.1:621138-622421(-) | length=427 | sequence_SO=chromosome | SO=protein_coding
Tb927.10.15310	hypothetical protein, conserved, linked to melarsoprol resistance, no yeast/human by NCBI	ZUnknown	1	1	1	0	0	3.9	3.3816	0.514	1.0686	nd	2	6	3	2	6	0	0	0	0	0	0	640250	416490	919280	0	0	0	0	0	0	18651000	13433000	17317000	0	0	0	0	0	0	25	1976000	Tb927.10.15310;REV__Tb927.10.2600	Tb927.10.15310_hypothetical protein, conserved | location=Tb927_10_v5.1:3745784-3747139(+) | length=451 | sequence_SO=chromosome | SO=protein_coding
Tb927.11.2650	heat shock protein 84, putative, mit HSp90	Chaperone	1	1	1	0	0	0.445	0.8552	0.501	-1.0368	nd	1	5	4	1	4	0	0	0	0	0	1	260360	51122	214380	0	0	0	0	0	50287	12686000	0	9151900	0	0	0	0	0	0	46	576150	Tb927.11.2650	Tb927.11.2650_heat shock protein 84, putative | location=Tb927_11_v5.1:776838-779109(-) | length=753 | sequence_SO=chromosome | SO=protein_coding
Tb927.7.2330	Protein of unknown function (DUF1663), putative	ZUnknown	1	1	1	0	0	2.18	2.9506	0.486	0.8679	nd	1	4	4	2	3	0	0	0	0	0	0	670810	186970	503340	0	0	0	0	0	0	26610000	11097000	23543000	0	0	0	0	0	0	45	1361100	Tb927.7.2330	Tb927.7.2330_hypothetical protein, conserved | location=Tb927_07_v5.1:599448-602747(-) | length=1099 | sequence_SO=chromosome | SO=protein_coding
Tb927.11.7218	MERS2, component of mitochondrial complex containing the MERS1 NUDIX hydrolase	Mito.RNA	1	1	1	0	0	2.08	2.5384	0.464	0.9301	nd	2	10	3	5	10	0	0	0	0	0	0	138330	243570	903800	0	0	0	0	0	0	13248000	17895000	43428000	0	0	0	0	0	0	58	1285700	Tb927.11.7218;Tb11.02.5120b	Tb927.11.7218_mitochondrial edited mRNA stability factor 1 subunit | location=Tb927_11_v5.1:2032952-2035792(+) | length=946 | sequence_SO=chromosome | SO=protein_coding;Tb11.02.5120b | organism=Trypanosoma_br
Tb927.8.990	RBP33	RNA.binding	1	1	1	0	0	1.35	1.7664	0.46	-0.9237	nd	1	2	2	1	2	0	0	0	0	0	0	639410	175930	545090	0	0	0	0	0	0	9644700	0	8122800	0	0	0	0	0	0	15	1360400	Tb927.8.990	Tb927.8.990_RNA-binding protein, putative (RBP33) | location=Tb927_08_v5.1:316063-317019(-) | length=318 | sequence_SO=chromosome | SO=protein_coding
Tb927.11.8320	hypothetical protein, conserved	ZUnknown	1	1	1	0	0	0.412	0.9776	0.43	-1.1476	nd	1	5	5	1	3	0	0	0	0	0	0	809330	43442	180910	0	0	0	0	0	0	16485000	0	9260900	0	0	0	0	0	0	26	1033700	Tb927.11.8320	Tb927.11.8320_hypothetical protein, conserved | location=Tb927_11_v5.1:2336580-2337884(+) | length=434 | sequence_SO=chromosome | SO=protein_coding
Tb927.4.1500	RNA editing associated helicase 2 (REH2) MRB 1 subunit	Mito.RNA	1	1	1	0	0	1.53	3.815	0.419	1.3363	nd	1	45	17	6	44	0	0	0	0	0	0	499870	99032	1911300	0	0	0	0	0	0	61913000	15875000	215910000	0	0	0	0	0	0	117	2510200	Tb927.4.1500	Tb927.4.1500_RNA editing associated helicase 2 (REH2) | location=Tb927_04_v5.1:381085-387588(-) | length=2167 | sequence_SO=chromosome | SO=protein_coding
Tb927.11.17000	AIR9	Cell.cycle	0	0	0	0	0	0.137	0.3279	0.412	-0.9154	nd	2	6	5	2	2	0	0	1	0	0	0	308310	88778	110740	0	0	19060	0	0	0	12157000	6070500	6655500	0	0	0	0	0	0	49	526880	Tb927.11.17000;Tb11.v5.0404	Tb927.11.17000_leucine-rich repeat protein (LRRP), putative | location=Tb927_11_v5.1:4531475-4535811(-) | length=999 | sequence_SO=chromosome | SO=protein_coding;Tb11.v5.0404 | organism=Trypanosoma_brucei_TRE
Tb927.1.120	retrotransposon hot spot protein 4 (RHS4), putative	RHS	0	0	0	0	1	2.32	2.636	0.357	0.7412	4.783	1	14	8	13	5	0	0	1	1	2	0	650360	1270800	252910	0	0	51972	32674	52427	0	19224000	62515000	14290000	0	0	0	0	4162400	0	45	2311100	Tb927.1.120	Tb927.1.120_retrotransposon hot spot protein 4 (RHS4), putative | location=Tb927_01_v5.1:60266-62836(-) | length=856 | sequence_SO=chromosome | SO=protein_coding
Tb927.3.1930	CDC40 / PRP17	RNA.processing	0	0	1	0	1	0.281	-0.6206	0.345	0.4812	4.2239	1	9	4	4	2	0	0	0	7	7	0	641620	729430	233080	0	0	0	882520	1003400	0	18653000	16827000	8590800	0	0	0	19159000	24022000	0	25	3490100	Tb927.3.1930	Tb927.3.1930_hypothetical protein, conserved | location=Tb927_03_v5.1:507936-509375(-) | length=479 | sequence_SO=chromosome | SO=protein_coding
Tb927.11.11150	U5 snRNP-specific 40 kDa protein U5-40K	RNA.processing	0	0	1	0	0	0.539	-0.7456	0.337	-0.5839	nd	1	5	4	2	2	0	0	0	4	2	0	498290	296720	192120	0	0	0	406740	403190	0	7427300	6515500	4119000	0	0	0	5375200	8910000	0	18	1797100	Tb927.11.11150	Tb927.11.11150_U5 snRNP-specific 40 kDa protein | location=Tb927_11_v5.1:2985149-2986129(+) | length=326 | sequence_SO=chromosome | SO=protein_coding
Tb927.11.1980	ZC3H41	RNA.binding	0	0	1	1	0	0.3	0.7722	0.309	0.5541	nd	1	8	5	4	3	0	0	0	5	4	1	883770	445270	349830	0	0	0	652910	325220	88045	21126000	13991000	13155000	0	0	0	16087000	10036000	0	28	2745000	Tb927.11.1980	Tb927.11.1980_zinc finger protein family member, putative (ZC3H41) | location=Tb927_11_v5.1:574332-575885(+) | length=517 | sequence_SO=chromosome | SO=protein_coding
Tb927.11.14100	DRBD4 (PTB2)	RNA.binding	0	0	1	1	0	0.468	0.519	0.271	0.4297	nd	1	4	3	4	3	0	0	0	2	4	1	720600	597990	503340	0	0	0	242090	389850	155860	15423000	9854900	9360000	0	0	0	7162200	9730500	0	21	2609700	Tb927.11.14100	Tb927.11.14100_DRBD4 (DRBD4) | location=Tb927_11_v5.1:3736962-3739072(+) | length=505 | sequence_SO=chromosome | SO=protein_coding
Tb927.11.15990	TbNup109 Outer ring	Nuclear.transport	1	1	1	0	0	2.54	2.8005	0.19	0.5002	nd	1	11	9	3	7	0	0	0	0	0	0	481870	192990	558390	0	0	0	0	0	0	21532000	13270000	24393000	0	0	0	0	0	0	48	1233200	Tb927.11.15990	Tb927.11.15990_nucleoporin Nup109 (TbNup109) | location=Tb927_11_v5.1:4233647-4236652(-) | length=1001 | sequence_SO=chromosome | SO=protein_coding
Tb927.3.4030	hypothetical protein, conserved	Mito.pathway	1	1	1	0	0	0.775	1.8305	0.143	-0.4415	nd	1	15	2	6	14	0	0	0	0	0	0	29686	173600	741770	0	0	0	0	0	0	2747000	10137000	41929000	0	0	0	0	0	0	58	945050	Tb927.3.4030	Tb927.3.4030_hypothetical protein, conserved | location=Tb927_03_v5.1:1135394-1139037(-) | length=1213 | sequence_SO=chromosome | SO=protein_coding
Tb927.5.2060	cell division control protein CDC5f, part of PRP19 complex	RNA.processing	0	0	1	0	1	0.104	-0.1977	0.142	0.284	3.7136	1	11	9	6	4	0	0	0	3	7	0	715110	543970	214510	0	0	0	201350	436300	0	22325000	19899000	9794000	0	0	0	13652000	20891000	0	41	2111200	Tb927.5.2060	Tb927.5.2060_cell division control protein, putative | location=Tb927_05_v5.1:707612-709795(-) | length=727 | sequence_SO=chromosome | SO=protein_coding
Tb927.10.14360	U2 small nuclear ribonucleoprotein 40K (U2_40K)	RNA.processing	0	0	1	1	1	0.382	-0.8909	0.137	0.3065	3.4913	1	9	6	3	2	0	0	0	6	8	2	1342700	547170	284720	0	0	0	1507100	2658100	201570	21419000	15131000	7987600	0	0	0	20467000	36432000	0	16	6541300	Tb927.10.14360	Tb927.10.14360_U2 small nuclear ribonucleoprotein 40K (U2_40K) | location=Tb927_10_v5.1:3492521-3493498(-) | length=325 | sequence_SO=chromosome | SO=protein_coding
Tb927.3.2050	hypothetical protein, conserved, no domains, poly(Q) tracts, K-specific	Mito.DNA	1	1	1	0	0	0.634	1.4308	0.134	-0.451	nd	1	11	10	6	2	0	0	0	1	0	0	609180	292650	43205	0	0	0	24619	0	0	32427000	26192000	0	0	0	0	0	0	0	65	969650	Tb927.3.2050	Tb927.3.2050_hypothetical protein, conserved | location=Tb927_03_v5.1:534244-538962(-) | length=1572 | sequence_SO=chromosome | SO=protein_coding
Tb927.11.8770	eIF4AIII or ATP-dependent RNA helicase FAL1	Nuclear.transport	0	0	1	0	1	0.184	-0.7498	0.111	0.3652	1.4867	1	9	7	7	1	0	0	0	6	6	0	1910000	1521300	184910	0	0	0	1218100	1903000	0	31086000	27207000	0	0	0	0	27662000	41092000	0	20	6737300	Tb927.11.8770	Tb927.11.8770_ATP-dependent RNA helicase FAL1, putative | location=Tb927_11_v5.1:2410573-2411778(+) | length=401 | sequence_SO=chromosome | SO=protein_coding
Tb927.2.6070	mitochondrial RNA binding complex 1 subunit (MRB6070)	Mito.RNA	1	1	1	0	0	1.22	2.2193	0.0919	0.2924	nd	1	3	2	1	2	0	0	0	0	0	0	747380	460890	2329300	0	0	0	0	0	0	0	0	37269000	0	0	0	0	0	0	16	3537600	Tb927.2.6070	Tb927.2.6070_mitochondrial RNA binding complex 1 subunit (MRB6070) | location=Tb927_02_v5.1:1096360-1097217(+) | length=285 | sequence_SO=chromosome | SO=protein_coding
Tb927.6.1470	hypothetical protein, conserved, Arg-rich repeats	ZUnknown	0	0	1	0	0	0.0218	0.0864	0.0836	0.1744	nd	1	6	3	1	2	0	0	0	0	0	5	939540	238050	455260	0	0	0	0	0	3423600	7335500	0	6241600	0	0	0	0	0	20152000	7	5056500	Tb927.6.1470	Tb927.6.1470_hypothetical protein, conserved | location=Tb927_06_v5.1:516753-517433(-) | length=223 | sequence_SO=chromosome | SO=protein_coding
Tb927.6.4950	mago nashi-like protein, putative	Nuclear.transport	0	0	1	0	0	0.122	-0.2796	0.0735	-0.1798	nd	1	2	1	2	2	0	0	0	1	2	0	427370	424790	448980	0	0	0	327780	663290	0	0	4662400	4266800	0	0	0	0	6441300	0	10	2292200	Tb927.6.4950	Tb927.6.4950_mago nashi-like protein, putative | location=Tb927_06_v5.1:1365488-1365931(+) | length=147 | sequence_SO=chromosome | SO=protein_coding
Tb927.2.3180	kinetoplast polyadenylation/uridylation factor 1 (KPAF1), PPR1	Mito.RNA	1	1	1	0	0	1.45	2.494	0.0419	0.1311	nd	2	8	3	4	8	0	0	0	0	0	0	142850	241980	608830	0	0	0	0	0	0	16519000	15005000	21141000	0	0	0	0	0	0	53	993660	Tb927.2.3180;Tb11.v5.0782	Tb927.2.3180_kinetoplast polyadenylation/uridylation factor 1 (PPR1) | location=Tb927_02_v5.1:587698-590709(+) | length=1003 | sequence_SO=chromosome | SO=protein_coding;Tb11.v5.0782 | organism=Trypanosoma_br
Tb927.11.2300	ERF1 eukaryotic peptide chain release factor subunit 1, putative	Translation	0	0	1	1	1	0.0242	-0.0622	0.0193	-0.0317	4.638	1	6	4	2	3	0	0	0	4	2	1	418250	222440	387670	0	0	0	412250	380410	56790	13414000	8883500	7519600	0	0	0	8435600	10915000	0	27	1877800	Tb927.11.2300	Tb927.11.2300_eukaryotic peptide chain release factor subunit 1, putative (ERF1) | location=Tb927_11_v5.1:656382-657740(+) | length=452 | sequence_SO=chromosome | SO=protein_coding
Tb927.10.1540	ZC3H30	RNA.binding	1	1	1	0	0	1.57	1.777	0.0117	0.0197	nd	1	7	4	3	4	0	0	0	2	0	0	334310	250250	408590	0	0	0	86734	0	0	8275600	7725800	9820300	0	0	0	0	0	0	26	1079900	Tb927.10.1540	Tb927.10.1540_zinc finger protein family member, putative (ZC3H30) | location=Tb927_10_v5.1:420118-421812(-) | length=564 | sequence_SO=chromosome | SO=protein_coding
Tb927.11.6440	hypothetical protein, conserved, Bromodomain and poly(Q), often in TAP MS, low similarity to coiled-coil proteins and hook proteins (cytoskeletal linkers)	ZUnknown	0	0	1	1	1	1.23	-1.4753	0.00753	0.02	2.884	1	5	4	3	1	0	0	0	3	3	2	656380	625710	99124	0	0	0	415160	308520	233390	9959300	10798000	0	0	0	0	10030000	6560600	7435700	20	2338300	Tb927.11.6440	Tb927.11.6440_hypothetical protein, conserved | location=Tb927_11_v5.1:1820426-1821751(-) | length=441 | sequence_SO=chromosome | SO=protein_coding

## Sheet: filteredProteinGroups
GeneID	Annotation	Category	D18 specific	DRBD18/GFP specific	DRBD18/ZC3H28 -log10 P-value	DRBD18/ZC3H28 log difference	DRBD18/GFP -log10 P-value	DRBD18/GFP -log difference	highest GFP peptides	lowest DRBD18 peptides	Number.of.proteins	Peptides	Razor...unique.peptides.A_DRBD18_1	Razor...unique.peptides.B DRBD18_2	Razor...unique.peptides.C DRBD18_3	Razor...unique.peptides.D_GFP_1	Razor...unique.peptides.E_GFP_2	Razor...unique.peptides.F_GFP_3	Razor...unique.peptides.G_Z28_1	Razor...unique.peptides.H_Z28_2	Razor...unique.peptides.I_Z28_3	iBAQ.A DRBD18_1	iBAQ.B DRBD18_2	iBAQ.C DRBD18_3	iBAQ.D GFP_1	iBAQ.E GFP_2	iBAQ.F GFP_3	iBAQ.G Z28_1	iBAQ.H Z28_2	iBAQ.I	LFQ.intensity.A DRBD18_1	LFQ.intensity.B DRBD18_2	LFQ.intensity.C DRBD18_3	LFQ.intensity.D GFP_1	LFQ.intensity.E GFP_2	LFQ.intensity.F GFP_3	LFQ.intensity.G Z28_1	LFQ.intensity.H Z28_2	LFQ.intensity.I Z28_3	iBAQ.peptides	iBAQ	Protein.IDs	Fasta.headers
Tb927.10.16120	inosine-5'-monophosphate dehydrogenase,IMP dehydrogenase	Nucleotides	0	1	0.0846	-0.0541	9.84	5.2427	7	37	1	45	40	37	38	2	2	7	37	37	32	124020000	78184000	89227000	78658	373410	621440	58268000	89543000	27335000	3090200000	2012800000	2259100000	1613800	5831200	13234000	1585900000	2222400000	809050000	26	467650000	Tb927.10.16120	Tb927.10.16120_inosine-5-monophosphate dehydrogenase,IMP dehydrogenase | location=Tb927_10_v5.1:3965348-3966691(+) | length=447 | sequence_SO=chromosome | SO=protein_coding
Tb927.9.15150	60S ribosomal protein L5	Ribosome	0	1	1.07	-0.7062	8.25	7.0067	1	15	2	17	15	16	16	0	0	1	15	15	14	101630000	98904000	62378000	0	0	177810	99379000	94730000	45063000	1009000000	928720000	645090000	0	0	0	947700000	970530000	488080000	10	502260000	Tb927.9.15150;Tb927.9.15110	Tb927.9.15150_unspecified product | location=Tb927_09_v5.1:2360401-2361327(+) | length=308 | sequence_SO=chromosome | SO=protein_coding;Tb927.9.15110_unspecifie
Tb927.2.3800	GRBC2 mRNA processing protein, putative GAP1 MRB complex protein	Mito.RNA	1	1	7.04	4.0625	7.56	7.4656	0	23	1	27	26	23	25	0	0	0	9	13	9	75393000	43347000	64109000	0	0	0	1175800	3224700	1284700	1698900000	894220000	1393200000	0	0	0	33432000	87326000	40674000	22	188530000	Tb927.2.3800	Tb927.2.3800_guide RNA associated protein, GAP1,MRB1-associated protein | location=Tb927_02_v5.1:676599-678077(-) | length=492 | sequence_SO=chromosome | SO=protein_coding
Tb927.1.2390	beta tubulin	Cytoskeleton	0	0	4.63	-2.083	6.84	-2.3294	33	28	6	36	29	31	28	21	33	27	29	29	32	95303000	66358000	76030000	11107000	48166000	80451000	154040000	137970000	246050000	1702400000	1283400000	1343300000	216290000	888290000	1513600000	2969700000	2821500000	4956400000	20	915490000	Tb927.1.2390;Tb927.1.2370;Tb927.1.2350;Tb927.1.2330;Tb11.v5.0469;Tb927.1.2410	Tb927.1.2390_beta tubulin | location=Tb927_01_v5.1:581408-582736(+) | length=442 | sequence_SO=chromosome | SO=protein_coding;Tb927.1.2370_beta tubulin | locati
Tb927.10.5620	fructose-bisphosphate aldolase, glycosomal (ALD)	Glucose.glycerol	0	1	1.38	0.4591	6.7	4.923	24	39	2	47	41	46	39	8	24	18	37	40	37	584970000	491880000	270880000	272630	2365000	2551000	199300000	248800000	99924000	12145000000	10676000000	5269400000	6367700	67225000	53667000	3897900000	5256500000	2079700000	21	1900900000	Tb927.10.5620;Tb11.v5.0531	Tb927.10.5620_fructose-bisphosphate aldolase, glycosomal (ALD) | location=Tb927_10_v5.1:1404259-1405377(+) | length=372 | sequence_SO=chromosome | SO=protein_coding;Tb11.v5.0531 | organism=Trypanosoma_brucei_
Tb927.1.2670	flagellar protein PF16	Cytoskeleton	0	0	7.89	-6.7033	6.66	-4.9206	2	0	1	12	0	1	0	0	1	2	10	10	6	0	0	0	0	59754	161270	1935100	1820500	956000	0	0	0	0	0	5690300	51166000	49554000	30029000	28	4932600	Tb927.1.2670	Tb927.1.2670_flagellar protein PF16 | location=Tb927_01_v5.1:618929-620470(+) | length=513 | sequence_SO=chromosome | SO=protein_coding
Tb927.5.1460	Mo/Co carrier or lysine decarboxylase	Enzyme	0	0	1.03	-1.0105	6.4	-4.3915	2	0	1	2	1	0	0	0	1	2	0	0	1	151660	0	0	0	67217	181930	0	0	64885	0	0	0	0	0	3274700	0	0	0	18	465690	Tb927.5.1460	Tb927.5.1460_hypothetical protein, conserved | location=Tb927_05_v5.1:520522-521502(-) | length=326 | sequence_SO=chromosome | SO=protein_coding
Tb927.9.10770	PABP2	Translation	0	1	1.49	-0.5417	6.4	6.2967	8	43	1	53	43	48	44	2	5	8	40	40	40	241830000	147750000	175750000	38569	407980	791820	194770000	149980000	107740000	7040500000	4239200000	5000400000	0	12528000	21522000	5916400000	4250600000	3010700000	29	1019100000	Tb927.9.10770	Tb927.9.10770_Polyadenylate-binding protein 2 (Poly(A)-binding protein 2) (Poly(A)-binding protein II) (PABII) (Polyadenylate-binding nuclear protein 1) (Nuclear poly(A)-binding protein 1) (PABP2), putative (
Tb927.10.7680	TBC-RootA likely Ran-GAP?	Nuclear.transport	1	1	9.02	10.079	6.28	8.0766	1	27	1	37	35	28	27	1	1	0	0	0	0	110820000	46637000	60062000	52189	0	0	0	0	0	2712500000	1126400000	1379600000	0	0	0	0	0	0	24	217570000	Tb927.10.7680	Tb927.10.7680_GTPase activating protein, putative | location=Tb927_10_v5.1:1931608-1933200(-) | length=530 | sequence_SO=chromosome | SO=protein_coding
Tb927.1.2400	alpha tubulin	Cytoskeleton	0	0	2.6	-1.2293	6.2	-1.9064	27	22	4	34	26	22	23	17	27	20	23	23	29	144050000	74712000	99678000	14419000	41540000	64046000	117710000	81818000	178490000	2968100000	1366500000	1830500000	306640000	681310000	1520200000	2936200000	2143000000	3259800000	21	816460000	Tb927.1.2400;Tb927.1.2380;Tb927.1.2360;Tb927.1.2340	Tb927.1.2400_alpha tubulin | location=Tb927_01_v5.1:583368-584723(+) | length=451 | sequence_SO=chromosome | SO=protein_coding;Tb927.1.2380_alpha tubulin | loca
Tb927.9.13990	DRBD2	RNA.binding	0	1	0.385	0.1571	6.16	7.4435	0	20	1	24	21	20	20	0	0	0	17	18	16	67047000	50787000	48730000	0	0	0	34875000	35876000	15145000	1164600000	880350000	807660000	0	0	0	596970000	603490000	279340000	18	252460000	Tb927.9.13990	Tb927.9.13990_RNA-binding protein, putative (DRBD2) | location=Tb927_09_v5.1:2183754-2185266(-) | length=305 | sequence_SO=chromosome | SO=protein_coding
Tb927.7.2570	GRBC1 guide RNA associated protein, GAP2	Mito.RNA	1	1	7.01	4.4664	6.1	7.7423	0	23	2	26	26	23	25	0	0	0	8	13	7	75756000	41156000	65331000	0	0	0	973410	2511700	1003700	1973300000	964360000	1593600000	0	0	0	26320000	81658000	29035000	25	186730000	Tb927.7.2570;Tb11.v5.0611	Tb927.7.2570_guide RNA associated protein, GAP2 | location=Tb927_07_v5.1:660255-661676(-) | length=473 | sequence_SO=chromosome | SO=protein_coding;Tb11.v5.0611 | organism=Trypanosoma_brucei_TREU927 | product
Tb927.10.7630	transportin2- like protein	Nuclear.transport	1	1	8.72	8.0868	5.99	6.2257	0	27	1	34	32	27	29	0	0	0	0	0	0	27512000	13035000	16307000	0	0	0	0	0	0	959290000	538550000	627500000	0	0	0	0	0	0	38	56854000	Tb927.10.7630	Tb927.10.7630_transportin2- like protein | location=Tb927_10_v5.1:1920059-1922884(-) | length=941 | sequence_SO=chromosome | SO=protein_coding
Tb927.3.4720	dynamin DLP1	Vesicular.transport	0	0	1.02	-0.8196	5.81	-7.0716	8	0	2	11	0	0	0	8	5	5	0	0	1	0	0	0	523650	232570	211170	0	0	55526	0	0	0	18234000	11586000	11778000	0	0	0	43	1022900	Tb927.3.4720;Tb927.3.4760	Tb927.3.4720_dynamin, putative,vacuolar sortin protein 1, putative | location=Tb927_03_v5.1:1333544-1335526(-) | length=660 | sequence_SO=chromosome | SO=protein_coding;Tb927.3.4760 | organism=Trypanosoma_bru
Tb927.11.2060	60S acidic ribosomal subunit	Ribosome	0	1	2.6	-0.9258	5.69	5.8941	1	12	2	22	20	16	12	0	1	1	17	17	14	85030000	66662000	29256000	0	250880	390750	62003000	75723000	37183000	1304400000	1008100000	503270000	0	0	0	1070000000	1192600000	615340000	16	356500000	Tb927.11.2060;Tb927.11.2050	Tb927.11.2060_60S acidic ribosomal subunit protein, putative | location=Tb927_11_v5.1:592664-593644(+) | length=324 | sequence_SO=chromosome | SO=protein_coding;Tb927.11.2050 | organism=Trypanosoma_brucei_TRE
Tb927.9.8740	DRBD3 (PTB1)	RNA.binding	0	1	0.584	0.3892	5.64	4.4282	0	7	1	9	9	8	7	0	0	0	8	8	6	14242000	7138100	6024500	0	0	0	4379700	4553500	2052800	145310000	84543000	68290000	0	0	0	49184000	46378000	28592000	11	38390000	Tb927.9.8740	Tb927.9.8740_RNA-binding protein (DRBD3) | location=Tb927_09_v5.1:1408798-1409781(-) | length=327 | sequence_SO=chromosome | SO=protein_coding
Tb927.11.980	TbNup158 Outer ring, FG Nup facing both sides	Nuclear.transport	1	1	7.02	8.0474	5.47	6.2949	0	34	1	42	40	34	37	0	0	0	0	0	0	14465000	7648000	11740000	0	0	0	0	0	0	727560000	408360000	584690000	0	0	0	0	0	0	51	33853000	Tb927.11.980	Tb927.11.980_Nucleoporin (TbNup158) | location=Tb927_11_v5.1:249745-254406(+) | length=1553 | sequence_SO=chromosome | SO=protein_coding
Tb927.11.9710	60S ribosomal protein L10a	Ribosome	0	1	2.01	-1.2942	5.34	6.3613	1	16	2	25	21	19	16	0	1	1	24	21	15	41005000	41402000	14788000	0	0	0	44778000	59321000	25196000	422900000	418600000	169660000	0	0	0	461180000	527190000	265370000	10	226490000	Tb927.11.9710;Tb927.10.13500	Tb927.11.9710_60S ribosomal protein L10a, putative (RPL10A) | location=Tb927_11_v5.1:2632935-2633579(-) | length=214 | sequence_SO=chromosome | SO=protein_coding;Tb927.10.13500 | organism=Trypanosoma_brucei_T
Tb927.3.5580	tryptophanyl-tRNA synthetase, putative	Translation.tRNA	0	0	5.11	-3.6978	5.33	-5.1446	4	0	1	5	0	0	0	0	2	4	3	4	2	0	0	0	0	193120	454560	304820	676050	199650	0	0	0	0	6705400	7210000	5772600	9249600	5798300	19	1828200	Tb927.3.5580	Tb927.3.5580_tryptophanyl-tRNA synthetase | location=Tb927_03_v5.1:1561871-1563040(+) | length=389 | sequence_SO=chromosome | SO=protein_coding
Tb927.11.11330	heat shock protein 70, major HSP70	Chaperone	0	0	0.991	-0.5165	5.31	-2.4558	39	40	4	52	43	41	40	26	38	39	39	36	41	49289000	29789000	32278000	10028000	17193000	30299000	30044000	22472000	30710000	1594200000	956600000	1029600000	354080000	594700000	1008300000	1066900000	776020000	983910000	34	252100000	Tb927.11.11330;Tb11.v5.1035;Tb11.v5.1034;Tb927.11.11290	Tb927.11.11330_heat shock protein 70 | location=Tb927_11_v5.1:3028681-3030666(+) | length=661 | sequence_SO=chromosome | SO=protein_coding;Tb11.v5.1035_heat sho
Tb927.11.5450	malic enzyme	Mito.pathway	0	0	0.188	0.3622	5.27	-5.3905	5	1	1	9	4	1	2	0	3	5	0	0	1	277840	67348	165300	0	204990	543250	0	0	84440	0	0	0	0	9199200	13248000	0	0	0	30	1343200	Tb927.11.5450	Tb927.11.5450_malic enzyme | location=Tb927_11_v5.1:1550378-1552093(+) | length=571 | sequence_SO=chromosome | SO=protein_coding
Tb927.10.1230	ESP23 enriched in surface proteome	Membrane.protein	0	0	0.923	-0.7285	5.22	-5.1123	3	0	1	3	1	0	0	0	3	3	0	0	0	103340	0	0	0	376410	365210	0	0	0	0	0	0	0	5680600	5443700	0	0	0	15	844970	Tb927.10.1230	Tb927.10.1230_hypothetical protein, conserved | location=Tb927_10_v5.1:333466-334494(-) | length=342 | sequence_SO=chromosome | SO=protein_coding
Tb927.2.5240	PRP19	RNA.processing	0	1	0.945	-0.7401	5.19	4.3264	0	13	1	23	17	17	13	0	0	0	19	20	9	9201500	6421800	3867100	0	0	0	8615200	10618000	1673900	247470000	186450000	118570000	0	0	0	224130000	281700000	72805000	28	40397000	Tb927.2.5240	Tb927.2.5240_PRP19-like protein, putative (TbPRP19) | location=Tb927_02_v5.1:921221-922750(+) | length=509 | sequence_SO=chromosome | SO=protein_coding
Tb11.02.5390b	Guide RNA binding complex protein 4	Mito.RNA	1	1	6.17	6.2881	5.17	4.8835	0	25	2	36	25	28	33	0	0	0	0	0	0	3298600	2880700	4276200	0	0	0	0	0	0	234980000	170410000	253310000	0	0	0	0	0	0	63	10456000	Tb11.02.5390b;Tb11.02.5390	Tb11.02.5390b_mRNA processing protein, putative | location=Tb927_11_bin_v5.1:653545-656808(+) | length=1087 | sequence_SO=random_sequence | SO=protein_coding;Tb11.02.5390 | organism=Trypanosoma_brucei_TREU927
Tb927.9.12630	glycerol kinase, glycosomal (glk1)	Glucose.glycerol	0	0	1.96	-1.0228	5.15	-2.4821	37	34	5	43	34	34	37	30	36	37	35	37	37	95583000	64624000	135110000	17528000	44639000	127260000	76536000	127860000	113490000	2520900000	1737000000	3502100000	535720000	1213600000	3312200000	2120300000	3354600000	3038000000	28	802640000	Tb927.9.12630;Tb927.9.12590;Tb927.9.12570;Tb927.9.12610;Tb927.9.12550	Tb927.9.12630_glycerol kinase, glycosomal (glk1) | location=Tb927_09_v5.1:1982416-1983954(+) | length=512 | sequence_SO=chromosome | SO=protein_coding;Tb927.9.12590 | organism=Trypanosoma_brucei_TREU927 | pro
Tb927.11.2950	TbNup89 Outer ring	Nuclear.transport	1	1	4.82	7.9044	5.08	5.3831	0	24	1	37	36	24	27	0	0	0	0	0	0	12925000	4897200	7666000	0	0	0	0	0	0	509010000	245040000	332730000	0	0	0	0	0	0	43	25488000	Tb927.11.2950	Tb927.11.2950_Nucleoporin (TbNup89) | location=Tb927_11_v5.1:858932-861322(-) | length=796 | sequence_SO=chromosome | SO=protein_coding
Tb927.10.14950	ZC3H40	RNA.binding	0	1	0.013	-0.0237	5.04	4.047	0	6	1	16	9	13	6	0	0	0	9	16	3	2964200	4895200	2029600	0	0	0	2148800	5718600	418450	78053000	89341000	46622000	0	0	0	53464000	103950000	10245000	21	18175000	Tb927.10.14950	Tb927.10.14950_RNA binding protein, putative,zinc finger protein family member, putative (ZC3H40) | location=Tb927_10_v5.1:3654477-3655775(+) | length=432 | sequence_SO=chromosome | SO=protein_coding
Tb927.4.410	CAF40	RNA.degradation	0	0	0.103	-0.2159	4.98	-4.6584	4	0	1	4	0	0	0	0	3	4	0	0	0	0	0	0	0	277050	329760	0	0	0	0	0	0	0	5568100	4747800	0	0	0	17	606820	Tb927.4.410	Tb927.4.410_CAF 40 (CAF40) | location=Tb927_04_v5.1:116904-117854(-) | length=316 | sequence_SO=chromosome | SO=protein_coding
Tb927.10.4990	CRK3 cdc2- like protein kinase	Cell.cycle	0	0	1.23	-1.0233	4.97	-5.0111	2	0	1	4	0	0	0	0	2	2	0	2	0	0	0	0	0	288990	230100	0	80960	0	0	0	0	0	4623800	0	0	0	0	16	600050	Tb927.10.4990	Tb927.10.4990_cell division related protein kinase 2, putative,CDC2-related protein kinase (CRK3) | location=Tb927_10_v5.1:1238533-1239468(+) | length=311 | sequence_SO=chromosome | SO=protein_coding
Tb927.10.1100	60S ribosomal protein L9	Ribosome	0	1	0.783	-0.8091	4.96	5.2488	0	7	2	13	7	10	9	0	0	0	13	10	7	5171300	12084000	12870000	0	0	0	22781000	9268400	4804900	96355000	132360000	149580000	0	0	0	210100000	89874000	58513000	11	66980000	Tb927.10.1100;Tb927.6.4690	Tb927.10.1100_60S ribosomal protein L9, putative | location=Tb927_10_v5.1:291635-292204(-) | length=189 | sequence_SO=chromosome | SO=protein_coding;Tb927.6.4690 | organism=Trypanosoma_brucei_TREU927 | produc
Tb927.8.8180	mitochondrial RNA binding complex 1 subunit (MRB8180)	Mito.RNA	1	1	4.72	7.1219	4.92	6.45	0	24	2	32	28	24	30	0	0	0	0	5	0	16905000	8367800	12672000	0	0	0	0	206230	0	761600000	410070000	553590000	0	0	0	0	9576600	0	46	38151000	Tb927.8.8180;Tb927.4.4150	Tb927.8.8180_mitochondrial RNA binding complex 1 subunit (MRB8180) | location=Tb927_08_v5.1:2419530-2422334(+) | length=934 | sequence_SO=chromosome | SO=protein_coding;Tb927.4.4150 | organism=Trypanosoma_bru
Tb927.3.5050	60S ribosomal protein L4	Ribosome	0	0	1.09	-3.1917	4.82	-3.2149	0	0	1	11	0	0	0	0	0	0	0	0	11	0	0	0	0	0	0	0	0	5082700	0	0	0	0	0	0	0	0	81323000	16	5082700	Tb927.3.5050	Tb927.3.5050_60S ribosomal protein L4 | location=Tb927_03_v5.1:1417717-1418841(+) | length=374 | sequence_SO=chromosome | SO=protein_coding
Tb927.5.3010	GRBC6 MRB1 complex subunit MRB3010 (MRB3010)	Mito.RNA	1	1	6.21	7.6996	4.79	5.3899	0	19	2	26	26	21	19	0	0	0	0	0	0	14168000	9631500	10654000	0	0	0	0	0	0	334920000	258400000	250960000	0	0	0	0	0	0	26	34453000	Tb927.5.3010;Tb11.v5.0691	Tb927.5.3010_MRB1-associated protein, putative,guide RNA binding protein, putative | location=Tb927_05_v5.1:1001145-1002695(+) | length=516 | sequence_SO=chromosome | SO=protein_coding;Tb11.v5.0691 | organism
Tb927.8.8170	REMC5A mitochondrial RNA binding protein 1, putative (MRB8170)	Mito.RNA	1	1	5.93	6.6889	4.78	4.3363	0	19	1	37	33	19	29	0	0	0	0	0	0	6273400	2847200	5677500	0	0	0	0	0	0	277610000	171130000	252160000	0	0	0	0	0	0	48	14798000	Tb927.8.8170	Tb927.8.8170_mitochondrial RNA binding protein 1, putative (MRB8170) | location=Tb927_08_v5.1:2416165-2418882(+) | length=905 | sequence_SO=chromosome | SO=protein_coding
Tb927.10.5370	40S ribosomal protein S10	Ribosome	0	1	1.24	-1.1056	4.76	4.5364	0	8	2	12	9	8	8	0	0	0	12	12	7	13031000	7886900	9565300	0	0	0	17257000	19725000	6362400	105550000	68875000	77810000	0	0	0	99606000	97824000	67117000	7	73827000	Tb927.10.5370;Tb927.10.5360	Tb927.10.5370_40S ribosomal protein S10, putative | location=Tb927_10_v5.1:1349780-1350298(+) | length=172 | sequence_SO=chromosome | SO=protein_coding;Tb927.10.5360 | organism=Trypanosoma_brucei_TREU927 | pr
Tb927.9.9290	PABP1	Translation	0	1	0.264	-0.2232	4.75	5.1817	0	19	1	31	24	19	24	0	0	0	27	22	16	13710000	6150200	10801000	0	0	0	11274000	7605000	2760800	398560000	205710000	274630000	0	0	0	273560000	209180000	100560000	28	52300000	Tb927.9.9290	Tb927.9.9290_Polyadenylate-binding protein 1 (Poly(A)-binding protein 1) (PABP 1) (PABP1) | location=Tb927_09_v5.1:1478262-1479962(-) | length=566 | sequence_SO=chromosome | SO=protein_coding
Tb927.6.3840	reticulon domain protein	Cytoskeleton	0	0	0.0821	0.1919	4.71	-8.7177	4	0	1	5	1	0	0	4	3	3	0	0	0	690680	0	0	11483000	3128600	1891400	0	0	0	0	0	0	57953000	23794000	18974000	0	0	0	9	17194000	Tb927.6.3840	Tb927.6.3840_reticulon domain protein | location=Tb927_06_v5.1:1137866-1138426(-) | length=186 | sequence_SO=chromosome | SO=protein_coding
Tb927.10.1140	epsilon tubulin (TUBE1)	Cytoskeleton	0	0	1.32	-1.0651	4.69	-3.3089	1	0	2	2	0	0	0	1	1	0	1	0	1	0	0	0	13597	23772	0	45385	0	36132	0	0	0	0	0	0	0	0	903300	25	118890	Tb927.10.1140;Tb11.0530	Tb927.10.1140_epsilon tubulin (TUBE1) | location=Tb927_10_v5.1:305279-306742(-) | length=487 | sequence_SO=chromosome | SO=protein_coding;Tb11.0530_chrX additio
Tb11.v5.0537	polyubiquitin, putative	Ubiquitin.proteasome	0	0	0.808	-1.3575	4.66	-6.3663	7	2	3	7	3	2	2	3	7	4	2	2	2	990370	324530	273640	1079700	2567500	1930900	238410	191450	480710	45960000	11858000	0	42717000	85623000	70883000	13288000	10712000	23299000	39	8077200	Tb11.v5.0537;Tb927.11.9920;Tb11.01.1680.v5	Tb11.v5.0537_polyubiquitin, putative | location=Tb927_11_bin_v5.1:2333410-2335281(+) | length=623 | sequence_SO=random_sequence | SO=protein_coding;Tb927.11.9920 | organism=Trypanosoma_brucei_TREU927 | produc
Tb927.2.4710	TRRM1	RNA.processing	0	1	0.437	0.2827	4.61	4.686	0	11	1	15	11	13	11	0	0	0	11	10	6	5532400	9352900	5902800	0	0	0	3939800	4090500	1503600	104780000	157290000	165710000	0	0	0	87236000	84210000	37543000	21	30322000	Tb927.2.4710	Tb927.2.4710_RNA-binding protein, putative (TRRM1) | location=Tb927_02_v5.1:833328-834653(-) | length=441 | sequence_SO=chromosome | SO=protein_coding
Tb927.9.300	VSG pseudogene	VSG	0	0	0.97	-0.887	4.61	-5.5496	1	0	1	1	0	0	0	0	1	1	0	0	0	0	0	0	0	256480	1002600	0	0	0	0	0	0	0	0	18047000	0	0	0	18	1259100	Tb927.9.300	Tb927.9.300_variant surface glycoprotein (VSG, pseudogene), putative | location=Tb927_09_v5.1:62860-64203(+) | length=446 | sequence_SO=chromosome | SO=protein_coding
Tb927.8.6250	TbNup76 Complex+149, 140, symmetric, interact MEX67	Nuclear.transport	1	1	6.32	6.9717	4.54	4.7265	0	18	1	25	23	18	20	0	0	0	0	0	0	9186800	4018700	5040700	0	0	0	0	0	0	338260000	178560000	249530000	0	0	0	0	0	0	42	18246000	Tb927.8.6250	Tb927.8.6250_hypothetical protein, conserved | location=Tb927_08_v5.1:1816925-1819000(+) | length=691 | sequence_SO=chromosome | SO=protein_coding
Tb927.4.2040	ALBA3	RNA.binding	0	1	0.549	-0.6037	4.54	3.0261	1	5	2	11	7	6	5	0	0	1	9	8	4	11778000	7263500	2994500	0	0	204130	9406400	8143600	3039500	84333000	61689000	40270000	0	0	0	57219000	44382000	28000000	8	42830000	Tb927.4.2040;Tb927.4.2030	Tb927.4.2040_ALBA-Domain Protein (ALBA3) | location=Tb927_04_v5.1:512242-512814(-) | length=190 | sequence_SO=chromosome | SO=protein_coding;Tb927.4.2030_ALBA-D
Tb927.10.9900	ABC1 protein, ESP6	Transporter	0	0	0.996	-1.4086	4.54	-4.4278	3	0	1	3	0	0	0	0	1	3	0	0	0	0	0	0	0	62978	242880	0	0	0	0	0	0	0	0	7043600	0	0	0	29	305860	Tb927.10.9900	Tb927.10.9900_ABC1 protein, putative | location=Tb927_10_v5.1:2445509-2447203(+) | length=564 | sequence_SO=chromosome | SO=protein_coding
Tb927.8.1960	NOT11	RNA.degradation	0	0	0.127	-0.2576	4.53	-4.6378	2	0	1	2	0	0	0	1	2	1	0	0	0	0	0	0	41340	152280	77202	0	0	0	0	0	0	0	3502500	0	0	0	0	23	270820	Tb927.8.1960	Tb927.8.1960_hypothetical protein, conserved | location=Tb927_08_v5.1:629740-631044(+) | length=434 | sequence_SO=chromosome | SO=protein_coding
Tb927.10.10830	RGG2, MRB complex component	Mito.RNA	1	1	5.3	6.2641	4.51	7.1487	0	10	1	14	12	10	12	0	0	0	2	2	1	64566000	45007000	63112000	0	0	0	479020	1262400	243980	698680000	429060000	589700000	0	0	0	4754500	12547000	0	10	174670000	Tb927.10.10830	Tb927.10.10830_RGG2 (RGG2) | location=Tb927_10_v5.1:2630304-2631266(-) | length=320 | sequence_SO=chromosome | SO=protein_coding
Tb11.v5.0866	major vault protein, putative	Enzyme	0	0	1.01	-1.1133	4.45	-4.3122	1	0	3	1	0	0	0	1	1	1	0	0	0	0	0	0	57124	43371	74167	0	0	0	0	0	0	0	0	2225000	0	0	0	30	174660	Tb11.v5.0866;Tb927.5.4460;Tb05.5K5.110	Tb11.v5.0866_major vault protein, putative | location=Tb927_11_bin_v5.1:4524831-4526390(-) | length=519 | sequence_SO=random_sequence | SO=protein_coding;Tb927.5.4460 | organism=Trypanosoma_brucei_TREU927 | p
Tb927.11.13580	ubiquinone biosynthesis protein-like protein	Mito.pathway	0	0	2.88	-3.6047	4.43	-6.119	3	0	1	4	0	1	0	0	3	3	2	4	1	0	113610	0	0	852700	606330	277210	753880	146390	0	0	0	0	8072200	11334000	8259500	9686300	0	15	2750100	Tb927.11.13580	Tb927.11.13580_ubiquinone biosynthesis protein-like protein | location=Tb927_11_v5.1:3627923-3628672(-) | length=249 | sequence_SO=chromosome | SO=protein_coding
Tb927.10.12960	ras-related protein rab-5,small GTPase, putative (RAB5A)	Vesicular.transport	0	0	2.04	-2.7841	4.42	-4.4359	3	1	1	5	1	1	2	1	2	3	4	2	4	290370	141930	355560	80567	185780	509240	535700	249300	897260	0	0	4952900	0	2757800	6089200	5063600	0	10939000	12	3245700	Tb927.10.12960	Tb927.10.12960_ras-related protein rab-5,small GTPase, putative (RAB5A) | location=Tb927_10_v5.1:3150211-3150903(-) | length=230 | sequence_SO=chromosome | SO=protein_coding
Tb927.11.8090	protein phosphatase 1, putative	Protein.phosphatase	0	0	0.658	-0.8837	4.41	-3.405	1	0	1	1	0	0	0	0	0	1	0	0	0	0	0	0	0	0	65907	0	0	0	0	0	0	0	0	988610	0	0	0	15	65907	Tb927.11.8090	Tb927.11.8090_protein phosphatase 1, putative | location=Tb927_11_v5.1:2267955-2268866(+) | length=303 | sequence_SO=chromosome | SO=protein_coding
Tb927.10.14840	mitochondrial carrier protein, MCP5c ATP/ADP carrier	Mito.transport	0	0	0.77	1.7183	4.37	-7.2879	8	0	3	9	1	5	0	4	8	6	0	0	0	183290	859950	0	664370	5304600	1997000	0	0	0	0	28284000	0	21463000	52095000	48200000	0	0	0	17	9009300	Tb927.10.14840;Tb927.10.14830;Tb927.10.14820	Tb927.10.14840_mitochondrial carrier protein (MCP5a) | location=Tb927_10_v5.1:3615071-3615994(-) | length=307 | sequence_SO=chromosome | SO=protein_coding;Tb927.10.14830 | organism=Trypanosoma_brucei_TREU927
Tb927.6.4300	glyceraldehyde 3-phosphate dehydrogenase, glycosomal (GAPDH)	Glucose.glycerol	0	1	1.06	-0.4871	4.33	3.1724	21	31	2	33	32	31	31	8	10	21	31	33	30	323160000	385550000	266260000	3191200	1545400	5109800	300460000	419740000	121210000	7330500000	9222800000	6087100000	90977000	43520000	140910000	6748500000	9399500000	2854900000	23	1826200000	Tb927.6.4300;Tb927.6.4280	Tb927.6.4300_glyceraldehyde 3-phosphate dehydrogenase, glycosomal (GAPDH) | location=Tb927_06_v5.1:1220755-1221834(-) | length=359 | sequence_SO=chromosome | SO=protein_coding;Tb927.6.4280 | organism=Trypanos
Tb927.3.1590	mitochondrial RNA binding complex 1 subunit (MRB1590)	Mito.RNA	1	1	1.79	1.0995	4.3	4.0049	0	17	1	23	17	20	23	0	0	0	10	9	9	4372900	4507400	6446300	0	0	0	1110900	1000500	861120	141160000	131390000	181650000	0	0	0	54914000	49468000	45285000	33	18299000	Tb927.3.1590	Tb927.3.1590_mitochondrial RNA binding complex 1 subunit (MRB1590) | location=Tb927_03_v5.1:414759-416765(-) | length=668 | sequence_SO=chromosome | SO=protein_coding
Tb927.3.4790	aminopeptidase, putative,metallo-peptidase, Clan MA(E) Family M1	Protease	0	0	0.0977	-0.1724	4.25	-3.6517	3	0	2	5	0	1	0	0	1	3	0	0	0	0	13214	0	0	42227	120840	0	0	0	0	0	0	0	0	5075200	0	0	0	42	176280	Tb927.3.4790;Tb927.3.4750	Tb927.3.4790_aminopeptidase, putative,metallo-peptidase, Clan MA(E) Family M1 | location=Tb927_03_v5.1:1349602-1352217(-) | length=871 | sequence_SO=chromosome | SO=protein_coding;Tb927.3.4750 | organism=Tryp
Tb927.4.1080	V-type ATPase, A subunit, putative	Lysosome	0	0	0.603	-0.86	4.24	-4.5618	4	1	1	5	2	1	2	0	0	4	0	0	0	52047	43070	54955	0	0	177450	0	0	0	0	0	0	0	0	5501000	0	0	0	31	327520	Tb927.4.1080	Tb927.4.1080_V-type ATPase, A subunit, putative | location=Tb927_04_v5.1:288344-290176(-) | length=610 | sequence_SO=chromosome | SO=protein_coding
Tb927.10.4940	PK50 protein kinase	Protein.kinase	0	0	0.368	-0.6432	4.24	-4.392	1	0	2	1	0	0	0	0	0	1	0	0	0	0	0	0	0	0	136110	0	0	0	0	0	0	0	0	3402900	0	0	0	25	136110	Tb927.10.4940;Tb11.v5.0596	Tb927.10.4940_Nuclear Dbf2-related kinase (PK50) | location=Tb927_10_v5.1:1228896-1230211(-) | length=437 | sequence_SO=chromosome | SO=protein_coding;Tb11.v5.0596 | organism=Trypanosoma_brucei_TREU927 | prod
Tb927.6.740	ATP-dependent DEAD/H RNA helicase, putative, no clear yeast homologue, DRBD3 interaction	RNA.helicase	0	0	0.872	-0.7688	4.24	-3.4048	0	0	1	2	0	2	0	0	0	0	0	0	0	0	18232	0	0	0	0	0	0	0	0	1294400	0	0	0	0	0	0	0	71	18232	Tb927.6.740	Tb927.6.740_ATP-dependent DEAH-box RNA helicase, putative | location=Tb927_06_v5.1:301628-305383(-) | length=1251 | sequence_SO=chromosome | SO=protein_coding
Tb927.10.2370	LA	Nuclear.transport	1	1	4.48	2.2285	4.22	3.6831	0	7	1	13	12	8	7	0	0	0	3	4	2	4498600	3162600	2510800	0	0	0	350200	601120	197080	103620000	70870000	52390000	0	0	0	10298000	15352000	7833700	23	11320000	Tb927.10.2370	Tb927.10.2370_RNA-binding protein, putative (LA) | location=Tb927_10_v5.1:607374-608381(+) | length=335 | sequence_SO=chromosome | SO=protein_coding
Tb927.9.12110	6-phosphogluconate dehydrogenase, decarboxylating (gnD)	PPP	0	0	0.29	-0.5259	4.19	-3.6469	2	0	1	3	0	0	0	0	1	2	0	0	0	0	0	0	0	28128	82108	0	0	0	0	0	0	0	0	2216900	0	0	0	27	110240	Tb927.9.12110	Tb927.9.12110_6-phosphogluconate dehydrogenase, decarboxylating (gnD) | location=Tb927_09_v5.1:1894375-1895814(+) | length=479 | sequence_SO=chromosome | SO=protein_coding
Tb927.11.11370	guanine nucleotide-binding protein beta subunit- like protein (TRACK)	Translation	0	1	5.37	-1.4368	4.17	5.0549	2	18	2	24	19	18	18	2	1	1	20	19	17	29114000	15766000	17214000	67753	0	0	32864000	37395000	21484000	565110000	289670000	329890000	0	0	0	672660000	722190000	343390000	19	153900000	Tb927.11.11370;Tb927.11.11360	Tb927.11.11370_receptor for activated C kinase 1 (RACK1) | location=Tb927_11_v5.1:3037315-3038271(+) | length=318 | sequence_SO=chromosome | SO=protein_coding;Tb927.11.11360 | organism=Trypanosoma_brucei_TREU
Tb927.7.2300	TbNup132 Outer ring	Nuclear.transport	1	1	6.28	6.7836	4.12	5.1355	0	22	1	31	28	22	27	0	0	0	0	0	0	4977600	2850700	5731000	0	0	0	0	0	0	292570000	187320000	320110000	0	0	0	0	0	0	59	13559000	Tb927.7.2300	Tb927.7.2300_Nucleoporin (TbNup132) | location=Tb927_07_v5.1:590215-593826(-) | length=1203 | sequence_SO=chromosome | SO=protein_coding
Tb927.8.5465	flagellar calcium-binding protein,24 kDa calflagin, (Tb-24)	Cytoskeleton	0	0	2.67	-3.0028	4.06	-3.2986	2	1	6	2	2	1	1	1	1	2	2	1	2	506400	195300	208220	0	178310	391700	1145500	321950	1046000	4113300	0	0	0	0	3109500	9202000	0	8292200	8	3993400	Tb927.8.5465;Tb927.8.5440;Tb11.v5.0798;Tb927.8.5470;Tb11.v5.0797;Tb927.8.5460	Tb927.8.5465_flagellar calcium-binding protein,24 kDa calflagin,24 kDa calcimedin (Tb-24) | location=Tb927_08_v5.1:1618985-1619641(+) | length=218 | sequence_SO=chromosome | SO=protein_coding;Tb927.8.5440 | o
Tb927.10.14710	40S ribosomal protein S2	Ribosome	0	1	4.12	-1.0456	4.06	4.8071	1	12	2	15	12	12	12	0	0	1	12	10	12	14938000	9631600	7176400	0	0	0	12861000	9644600	9481400	235500000	162020000	128630000	0	0	0	227930000	185790000	202100000	18	63733000	Tb927.10.14710;Tb927.10.14600	Tb927.10.14710_40S ribosomal protein S2, putative (RPS2) | location=Tb927_10_v5.1:3591980-3592780(-) | length=266 | sequence_SO=chromosome | SO=protein_coding;Tb927.10.14600 | organism=Trypanosoma_brucei_TREU
Tb927.11.15640	MERS1 mitochondrial RNA binding complex 1 subunit	Mito.RNA	1	1	9.48	7.073	4	5.7329	0	10	1	18	16	10	15	0	0	0	0	1	0	21074000	10661000	17804000	0	0	0	0	95049	0	456170000	224390000	306060000	0	0	0	0	0	0	20	49634000	Tb927.11.15640	Tb927.11.15640_mitochondrial RNA binding complex 1 subunit,NUDIX hydrolase, conserved | location=Tb927_11_v5.1:4147833-4149020(-) | length=395 | sequence_SO=chromosome | SO=protein_coding
Tb927.6.4480	valyl-tRNA synthetase, putative (ValRS)	Translation.tRNA	0	0	0.177	0.4539	3.99	-5.8382	8	2	1	11	3	3	2	4	7	8	0	1	0	135150	150550	106180	162300	284300	570110	0	36993	0	6696900	9029800	6547800	10087000	11643000	29242000	0	0	0	52	1445600	Tb927.6.4480	Tb927.6.4480_valyl-tRNA synthetase, putative (ValRS) | location=Tb927_06_v5.1:1256976-1259903(-) | length=975 | sequence_SO=chromosome | SO=protein_coding
Tb927.3.3820	hypothetical protein, conserved	ZUnknown	0	0	0.243	-0.3077	3.99	-7.2558	7	0	1	8	0	0	0	7	3	2	0	0	0	0	0	0	3453400	615600	203040	0	0	0	0	0	0	44941000	9149000	5717600	0	0	0	14	4272000	Tb927.3.3820	Tb927.3.3820_hypothetical protein, conserved | location=Tb927_03_v5.1:1061367-1062587(+) | length=406 | sequence_SO=chromosome | SO=protein_coding
Tb927.11.11080	TbNup149 Nup76 complex, FG, symmetric, interact MEX67	Nuclear.transport	1	1	5.6	7.6031	3.97	5.3827	0	16	1	26	24	19	16	0	0	0	0	0	0	8161000	4338700	5526800	0	0	0	0	0	0	704290000	449710000	534980000	0	0	0	0	0	0	94	18027000	Tb927.11.11080	Tb927.11.11080_Nucleoporin (TbNup149) | location=Tb927_11_v5.1:2966881-2971249(+) | length=1439 | sequence_SO=chromosome | SO=protein_coding
Tb927.2.1330	retrotransposon hot spot protein (RHS6, pseudogene), putative	RHS	0	0	1.62	-1.3217	3.96	-4.0812	2	0	1	4	0	0	2	0	0	2	0	0	0	0	0	164930	0	0	137420	0	0	0	0	0	0	0	0	2611100	0	0	0	19	302350	Tb927.2.1330	Tb927.2.1330_retrotransposon hot spot protein (RHS, pseudogene), putative,retrotransposon hot spot protein 6 (RHS6), degenerate | location=Tb927_02_v5.1:245650-247458(+) | length=602 | sequence_SO=chromosome
Tb927.8.6030	60S ribosomal protein L12	Ribosome	0	1	0.152	-0.1784	3.93	5.0424	1	4	2	5	4	4	4	0	1	1	3	5	3	51500000	47340000	31104000	0	679930	216510	28225000	33523000	18250000	412790000	362590000	239720000	0	0	0	220910000	277220000	143350000	8	210840000	Tb927.8.6030;Tb927.9.14000	Tb927.8.6030_60S ribosomal protein L12, putative | location=Tb927_08_v5.1:1761630-1762159(+) | length=164 | sequence_SO=chromosome | SO=protein_coding;Tb927.9.14000 | organism=Trypanosoma_brucei_TREU927 | pro
Tb927.11.2340	hypothetical protein, conserved	ZUnknown	1	1	6.09	7.2839	3.93	5.055	0	12	1	21	20	14	12	0	0	0	0	0	0	12374000	8324700	3573200	0	0	0	0	0	0	309330000	202050000	119680000	0	0	0	0	0	0	26	24272000	Tb927.11.2340	Tb927.11.2340_hypothetical protein, conserved | location=Tb927_11_v5.1:669889-671475(+) | length=528 | sequence_SO=chromosome | SO=protein_coding
Tb927.3.1840	3-oxo-5-alpha-steroid 4-dehydrogenase, putative	Sterols	1	0	4.47	3.8344	3.92	-4.3036	6	2	1	9	3	4	2	6	6	5	0	0	0	1242200	1568300	380580	2731800	1912500	1550400	0	0	0	20814000	24634000	12865000	26622000	19372000	17707000	0	0	0	13	9385700	Tb927.3.1840	Tb927.3.1840_3-oxo-5-alpha-steroid 4-dehydrogenase, putative | location=Tb927_03_v5.1:477826-478722(-) | length=298 | sequence_SO=chromosome | SO=protein_coding
Tb927.10.2240	NTF2-like domain, in Y14 TAP	Nuclear.transport	0	1	0.111	-0.2209	3.89	3.8278	0	14	1	22	14	16	15	0	0	0	18	18	5	3691600	5703700	5831800	0	0	0	9430500	6387200	510260	116880000	171290000	170820000	0	0	0	232250000	165240000	25403000	28	31555000	Tb927.10.2240	Tb927.10.2240_hypothetical protein, conserved | location=Tb927_10_v5.1:578334-580100(+) | length=588 | sequence_SO=chromosome | SO=protein_coding
Tb927.9.5690	60S acidic ribosomal protein	Ribosome	0	1	0.418	-0.6156	3.83	4.054	0	6	1	7	6	7	6	0	0	0	6	6	4	10488000	12875000	8134100	0	0	0	10217000	12844000	4156600	58395000	53390000	41159000	0	0	0	51959000	62226000	26453000	5	58716000	Tb927.9.5690	Tb927.9.5690_60S acidic ribosomal protein, putative | location=Tb927_09_v5.1:976021-976362(+) | length=113 | sequence_SO=chromosome | SO=protein_coding
Tb927.8.900	splicing factor TSR1 (TSR1)	RNA.processing	0	1	1.32	-1.2253	3.83	4.5061	0	5	1	14	9	10	5	0	0	0	8	13	6	6757000	12448000	2028600	0	0	0	8179000	18842000	2682200	107380000	185970000	57053000	0	0	0	146450000	270830000	47305000	16	50937000	Tb927.8.900	Tb927.8.900_splicing factor TSR1 (TSR1) | location=Tb927_08_v5.1:267851-269421(-) | length=328 | sequence_SO=chromosome | SO=protein_coding
Tb927.7.2240	hypothetical protein, conserved	ZUnknown	0	0	1.48	-1.4699	3.83	-3.1278	0	0	1	1	1	0	0	0	0	0	0	0	1	52650	0	0	0	0	0	0	0	54548	0	0	0	0	0	0	0	0	1200100	22	107200	Tb927.7.2240	Tb927.7.2240_hypothetical protein, conserved | location=Tb927_07_v5.1:578374-580008(-) | length=544 | sequence_SO=chromosome | SO=protein_coding
Tb927.9.7620	60S ribosomal protein L11	Ribosome	0	0	0.626	-1.6932	3.82	-2.6027	0	0	2	1	0	1	0	0	0	0	0	0	1	0	215540	0	0	0	0	0	0	2208700	0	0	0	0	0	0	0	0	15461000	7	2424200	Tb927.9.7620;Tb927.9.7590	Tb927.9.7620_60S ribosomal protein L11, putative | location=Tb927_09_v5.1:1248212-1248796(-) | length=194 | sequence_SO=chromosome | SO=protein_coding;Tb927.9.7590 | organism=Trypanosoma_brucei_TREU927 | prod
Tb927.7.3890	hypothetical protein, conserved	ZUnknown	0	0	0.783	-1.1528	3.82	-5.6785	2	0	1	2	0	0	0	1	2	1	0	0	0	0	0	0	84529	426280	234640	0	0	0	0	0	0	0	7673100	0	0	0	0	18	745450	Tb927.7.3890	Tb927.7.3890_hypothetical protein, conserved | location=Tb927_07_v5.1:1019311-1020231(+) | length=306 | sequence_SO=chromosome | SO=protein_coding
Tb927.4.3320	uracil phosphoribosyltransferase, putative	Nucleotides	0	0	1.67	-1.6362	3.79	-4.6483	2	0	1	2	0	0	0	0	1	2	0	1	0	0	0	0	0	228010	533310	0	275660	0	0	0	0	0	0	6399700	0	0	0	12	1037000	Tb927.4.3320	Tb927.4.3320_uracil phosphoribosyltransferase, putative | location=Tb927_04_v5.1:869431-870153(-) | length=240 | sequence_SO=chromosome | SO=protein_coding
Tb927.6.2830	TBC-D3 likely GAP	Signalling	0	0	0.558	-0.7221	3.79	-4.5105	5	0	1	5	2	0	1	0	2	5	0	0	0	145610	0	84950	0	149090	727410	0	0	0	4531100	0	0	0	5038000	12917000	0	0	0	22	1107100	Tb927.6.2830	Tb927.6.2830_GTPase activating protein, conserved | location=Tb927_06_v5.1:846338-847684(+) | length=448 | sequence_SO=chromosome | SO=protein_coding
Tb927.9.14240	TbNup82 Outer ring	Nuclear.transport	1	1	6.45	6.7679	3.77	4.2561	0	13	2	18	18	13	14	0	0	0	0	0	0	10115000	3821800	5654000	0	0	0	0	0	0	276730000	147530000	202660000	0	0	0	0	0	0	32	19591000	Tb927.9.14240;Tb11.v5.0621	Tb927.9.14240_Nucleoporin (Nup82) | location=Tb927_09_v5.1:2229379-2231694(-) | length=752 | sequence_SO=chromosome | SO=protein_coding;Tb11.v5.0621_hypothetica
Tb927.10.9650	TbNup152 Outer ring	Nuclear.transport	1	1	5.82	6.1147	3.68	4.6253	0	15	1	26	23	15	24	0	0	0	0	0	0	4022500	1553000	3456400	0	0	0	0	0	0	264110000	119570000	209850000	0	0	0	0	0	0	66	9032000	Tb927.10.9650	Tb927.10.9650_hypothetical protein, conserved | location=Tb927_10_v5.1:2377684-2381904(+) | length=1406 | sequence_SO=chromosome | SO=protein_coding
Tb927.11.16970	protein phosphatase 4, putative	Protein.phosphatase	0	0	1.94	-1.6702	3.67	-3.5595	4	2	1	7	4	2	3	0	3	4	3	3	5	317560	155120	376490	0	218220	766930	253260	275620	490220	5441000	4583300	7202300	0	5235200	10267000	4910600	5128700	5740200	17	2853400	Tb927.11.16970	Tb927.11.16970_protein phosphatase 4, putative | location=Tb927_11_v5.1:4524496-4525407(-) | length=303 | sequence_SO=chromosome | SO=protein_coding
Tb927.11.11940	protein phosphatase 2A, putative	Protein.phosphatase	0	0	2.49	-3.9068	3.61	-4.7145	4	1	1	6	1	1	2	0	1	4	3	2	6	0	0	285040	0	146500	859040	293500	534300	1758800	0	0	0	0	0	11745000	0	12469000	23069000	15	3877200	Tb927.11.11940	Tb927.11.11940_protein phosphatase 2A, putative | location=Tb927_11_v5.1:3197354-3198274(+) | length=306 | sequence_SO=chromosome | SO=protein_coding
Tb927.7.240	40S ribosomal protein S33	Ribosome	0	1	0.395	-0.5972	3.59	3.8344	0	2	2	6	5	3	2	0	0	0	5	5	2	12366000	4947200	4832200	0	0	0	7269800	9915600	3202800	55249000	28466000	37674000	0	0	0	34303000	37828000	17623000	5	42534000	Tb927.7.240;Tb927.7.230	Tb927.7.240_40S ribosomal protein S33, putative | location=Tb927_07_v5.1:43919-44230(+) | length=103 | sequence_SO=chromosome | SO=protein_coding;Tb927.7.230_40
Tb927.11.6140	40S ribosomal protein S15A	Ribosome	0	1	0.424	-0.5066	3.59	4.1287	1	4	2	8	6	4	4	0	1	0	7	7	5	15186000	7420900	10185000	0	110550	0	12068000	7162400	6863800	85108000	61302000	86661000	0	0	0	73581000	49357000	50755000	7	58998000	Tb927.11.6140;Tb927.3.4360	Tb927.11.6140_40S ribosomal protein S15A, putative | location=Tb927_11_v5.1:1731663-1732055(-) | length=130 | sequence_SO=chromosome | SO=protein_coding;Tb927.3.4360 | organism=Trypanosoma_brucei_TREU927 | pr
Tb927.9.11600	Gim5B protein,glycosomal membrane protein (gim5B)	Glycosome	1	0	2.12	2.1097	3.56	-4.0222	4	2	2	7	3	2	5	4	3	4	2	2	2	2093300	1220600	1984100	5095200	1429300	2172600	230880	122200	466960	35561000	24512000	28255000	74822000	23447000	33640000	4394000	0	9361400	16	14815000	Tb927.9.11600;Tb927.9.11580	Tb927.9.11600_unspecified product (gim5B) | location=Tb927_09_v5.1:1806052-1808712(+) | length=241 | sequence_SO=chromosome | SO=protein_coding;Tb927.9.11580_Gi
Tb927.10.4120	60S ribosomal protein L30	Ribosome	0	1	0.743	-0.9793	3.56	3.4775	0	4	2	10	6	4	5	0	0	0	10	8	5	8402500	5931900	9093500	0	0	0	20179000	12174000	3263800	57758000	49625000	60440000	0	0	0	104660000	57572000	24209000	6	59045000	Tb927.10.4120;Tb927.10.4110	Tb927.10.4120_60S ribosomal protein L30 (RPL30) | location=Tb927_10_v5.1:1082682-1082999(-) | length=105 | sequence_SO=chromosome | SO=protein_coding;Tb927.10.4110 | organism=Trypanosoma_brucei_TREU927 | prod
Tb927.11.4860	Ring finger domain containing protein, putative	ZUnknown	0	0	0.612	-0.5333	3.55	-3.2118	1	0	1	1	1	0	1	0	0	1	0	0	1	70636	0	69080	0	0	25855	0	0	32776	0	0	0	0	0	0	0	0	852180	26	198350	Tb927.11.4860	Tb927.11.4860_hypothetical protein, conserved | location=Tb927_11_v5.1:1394308-1395708(+) | length=466 | sequence_SO=chromosome | SO=protein_coding
Tb927.10.8720	NOT10	RNA.degradation	0	0	0.634	-0.84	3.54	-3.2358	1	0	1	2	1	0	0	1	0	0	0	0	0	29103	0	0	29757	0	0	0	0	0	0	0	0	654660	0	0	0	0	0	22	58860	Tb927.10.8720	Tb927.10.8720_CCR4-NOT transcription complex subunit 10, putative | location=Tb927_10_v5.1:2153077-2154744(+) | length=555 | sequence_SO=chromosome | SO=protein_coding
Tb927.2.3880	HNRNPH/F	RNA.processing	0	1	1.65	0.963	3.54	4.112	0	13	1	20	13	17	17	0	0	0	7	10	7	5448000	9040200	11366000	0	0	0	2049200	2613700	1279200	118000000	199470000	256570000	0	0	0	67239000	73670000	48168000	24	31796000	Tb927.2.3880	Tb927.2.3880_heterogeneous nuclear ribonucleoprotein H/F, putative (HNRNPH) | location=Tb927_02_v5.1:684803-686266(-) | length=487 | sequence_SO=chromosome | SO=protein_coding
Tb927.8.980	Phosphoacetylglucosamine mutase PAGM, acts as phosphoglucomutase	Glucose.glycerol	0	0	0.282	-0.6172	3.52	-4.7187	5	2	1	7	4	3	2	0	1	5	0	0	1	240980	105200	53575	0	70324	433670	0	0	0	7940900	5697000	0	0	0	12877000	0	0	0	34	903750	Tb927.8.980	Tb927.8.980_phosphoacetylglucosamine mutase, putative,acetylglucosaminephosphomutase, putative,N-acetylglucosamine-phosphate mutase, putative | location=Tb927_08_v5.1:311350-313161(-) | length=602 | sequence_
Tb927.6.5070	hypothetical protein, conserved, myosin-like	ZUnknown	0	0	2.62	-2.6091	3.52	-3.6911	0	0	1	4	0	0	1	0	0	0	1	2	2	0	0	50573	0	0	0	80511	183180	231940	0	0	0	0	0	0	0	4213200	0	23	546200	Tb927.6.5070	Tb927.6.5070_hypothetical protein, conserved | location=Tb927_06_v5.1:1383939-1385303(+) | length=454 | sequence_SO=chromosome | SO=protein_coding
Tb927.8.5600	transaldolase, putative	Glucose.glycerol	0	0	0.696	-0.8257	3.51	-3.422	0	0	1	1	1	0	1	0	0	0	0	0	0	101360	0	58048	0	0	0	0	0	0	0	0	986810	0	0	0	0	0	0	17	159410	Tb927.8.5600	Tb927.8.5600_transaldolase, putative | location=Tb927_08_v5.1:1663004-1664002(+) | length=332 | sequence_SO=chromosome | SO=protein_coding
Tb927.7.2800	Prp18 domain containing protein, putative	ZUnknown	0	0	2.6	-3.6188	3.47	-3.358	0	0	1	2	0	0	0	0	0	0	2	2	0	0	0	0	0	0	0	502500	560770	0	0	0	0	0	0	0	7012100	7873700	0	14	1063300	Tb927.7.2800	Tb927.7.2800_hypothetical protein, conserved | location=Tb927_07_v5.1:726181-727473(+) | length=430 | sequence_SO=chromosome | SO=protein_coding
Tb927.10.14180	TbSec13 Outer ring nucleoporin	Nuclear.transport	1	1	6.13	6.6381	3.46	4.0877	0	7	1	12	11	7	11	0	0	0	1	0	1	11336000	2810400	5534900	0	0	0	81720	0	75177	172620000	67037000	75238000	0	0	0	0	0	0	16	19838000	Tb927.10.14180	Tb927.10.14180_protein transport protein SEC13, putative,cytosolic coat protein, putative | location=Tb927_10_v5.1:3444000-3445124(-) | length=374 | sequence_SO=chromosome | SO=protein_coding
Tb927.11.12120	RBP9	RNA.binding	0	0	0.812	-0.9657	3.45	-3.4164	0	0	1	1	1	0	0	0	0	0	0	0	0	226740	0	0	0	0	0	0	0	0	1587200	0	0	0	0	0	0	0	0	7	226740	Tb927.11.12120	Tb927.11.12120_RNA-binding protein, putative (RBP9) | location=Tb927_11_v5.1:3238830-3239483(+) | length=217 | sequence_SO=chromosome | SO=protein_coding
Tb927.9.7260	phytanoyl-CoA dioxygenase (PhyH), putative	ZUnknown	1	1	5.21	3.6065	3.45	2.2867	0	3	1	4	4	4	3	0	0	0	0	0	0	1513400	1207300	1156100	0	0	0	0	0	0	21614000	14994000	21543000	0	0	0	0	0	0	15	3876800	Tb927.9.7260	Tb927.9.7260_hypothetical protein, conserved | location=Tb927_09_v5.1:1176801-1177901(+) | length=366 | sequence_SO=chromosome | SO=protein_coding
Tb927.7.4810	HD domain containing protein, putative	ZUnknown	0	0	0.345	-0.7117	3.44	-4.5629	2	0	2	3	0	0	0	0	1	2	0	0	0	0	0	0	0	39521	125920	0	0	0	0	0	0	0	0	3148000	0	0	0	25	165440	Tb927.7.4810;Tb11.v5.0163	Tb927.7.4810_hypothetical protein, conserved | location=Tb927_07_v5.1:1268543-1269919(-) | length=458 | sequence_SO=chromosome | SO=protein_coding;Tb11.v5.0163_
Tb927.8.7980	vacuolar-type H( )-translocating pyrophosphatase (TVP1)	Calcium	0	0	0.413	-0.6329	3.43	-5.8296	5	0	2	6	1	0	0	5	4	1	0	0	0	75775	0	0	590530	353370	72779	0	0	0	0	0	0	12899000	14474000	0	0	0	0	29	1092500	Tb927.8.7980;Tb927.4.4380	Tb927.8.7980_vacuolar-type proton translocating pyrophosphatase 1 (TVP1) | location=Tb927_08_v5.1:2351748-2354228(+) | length=826 | sequence_SO=chromosome | SO=protein_coding;Tb927.4.4380 | organism=Trypanoso
Tb927.10.10610	protein tyrosine phosphatase, putative	Protein.phosphatase	0	0	1.2	-1.4714	3.43	-4.6582	1	0	1	1	0	0	0	1	0	1	0	0	0	0	0	0	262640	0	162330	0	0	0	0	0	0	0	0	1461000	0	0	0	9	424970	Tb927.10.10610	Tb927.10.10610_protein tyrosine phosphatase, putative | location=Tb927_10_v5.1:2586326-2587015(-) | length=229 | sequence_SO=chromosome | SO=protein_coding
Tb927.10.14040	vacuolar ATP synthase subunit c, putative	Lysosome	0	0	0.684	-0.8999	3.42	-3.9742	1	0	1	2	1	0	0	0	0	1	0	0	0	62665	0	0	0	0	169450	0	0	0	0	0	0	0	0	3050200	0	0	0	18	232120	Tb927.10.14040	Tb927.10.14040_vacuolar ATP synthase subunit c, putative | location=Tb927_10_v5.1:3419149-3420291(-) | length=380 | sequence_SO=chromosome | SO=protein_coding
Tb927.7.3260	ESAG7, transferrin receptor, putative	ESAG	0	0	0.264	-0.3548	3.4	-3.587	1	0	2	1	0	0	0	0	0	1	0	0	0	0	0	0	0	0	60537	0	0	0	0	0	0	0	0	1271300	0	0	0	21	60537	Tb927.7.3260;Tb927.7.3250	Tb927.7.3260_expression site-associated gene (ESAG) protein, putative,expression site-associated gene 7 (ESAG7) protein, putative | location=Tb927_07_v5.1:840008-841027(-) | length=339 | sequence_SO=chromosom
Tb927.10.8430	40S ribosomal protein S12	Ribosome	0	1	1.74	-1.2191	3.4	3.9605	0	4	1	11	7	4	5	0	0	0	6	7	8	9838800	4198200	5578500	0	0	0	7725700	8727700	8826500	92568000	44386000	54586000	0	0	0	76442000	66912000	67024000	9	44895000	Tb927.10.8430	Tb927.10.8430_40S ribosomal protein S12, putative | location=Tb927_10_v5.1:2092016-2092444(+) | length=142 | sequence_SO=chromosome | SO=protein_coding
Tb927.3.4390	dihydrolipoamide dehydrogenase, putative (GCVL-1)	Enzyme	0	0	3.9	-2.6398	3.39	-3.2779	0	0	1	3	0	0	0	0	0	0	2	2	3	0	0	0	0	0	0	103930	134280	205900	0	0	0	0	0	0	4028700	0	5265900	30	444100	Tb927.3.4390	Tb927.3.4390_dihydrolipoamide dehydrogenase, putative (GCVL-1) | location=Tb927_03_v5.1:1227832-1229349(-) | length=505 | sequence_SO=chromosome | SO=protein_coding
Tb927.10.7060	TbNup96 Inner ring	Nuclear.transport	0	0	0.113	-0.2201	3.39	-3.158	2	0	1	2	1	1	0	0	1	2	0	0	0	0	0	0	0	21621	42213	0	0	0	0	0	0	0	0	1772900	0	0	0	42	63834	Tb927.10.7060	Tb927.10.7060_nucleoporin interacting component (NUP93), putative | location=Tb927_10_v5.1:1776795-1779446(+) | length=883 | sequence_SO=chromosome | SO=protein_coding
Tb927.11.740	eIF5A	Translation	0	0	0.16	0.3254	3.39	-2.7174	1	1	1	1	1	1	1	0	0	1	0	0	0	451290	166020	314180	0	0	209230	0	0	0	0	0	0	0	0	2092300	0	0	0	10	1140700	Tb927.11.740	Tb927.11.740_eukaryotic translation initiation factor 5a, putative (eIF-5A) | location=Tb927_11_v5.1:183340-185046(+) | length=166 | sequence_SO=chromosome | SO=protein_coding
Tb927.10.1090	40S ribosomal protein S23	Ribosome	0	0	0.92	-2.9727	3.38	-2.9606	0	0	2	6	0	0	0	0	0	0	0	0	6	0	0	0	0	0	0	0	0	7857600	0	0	0	0	0	0	0	0	55003000	7	7857600	Tb927.10.1090;Tb927.10.1080	Tb927.10.1090_40S ribosomal protein S23, putative (RPS23) | location=Tb927_10_v5.1:290689-291120(-) | length=143 | sequence_SO=chromosome | SO=protein_coding;Tb927.10.1080 | organism=Trypanosoma_brucei_TREU92
Tb927.3.1370	40S ribosomal protein S25	Ribosome	0	1	0.559	-0.9023	3.34	4.4519	0	3	2	8	3	4	4	0	0	0	8	7	2	14636000	11913000	15958000	0	0	0	30434000	18763000	3821900	68385000	58449000	65063000	0	0	0	133760000	81365000	33836000	5	95526000	Tb927.3.1370;Tb927.10.2840	Tb927.3.1370_40S ribosomal protein S25, putative | location=Tb927_03_v5.1:343637-343978(+) | length=113 | sequence_SO=chromosome | SO=protein_coding;Tb927.10.2840 | organism=Trypanosoma_brucei_TREU927 | produ
Tb927.7.4790	proteasome beta 6 subunit, putative (BETA6)	Ubiquitin.proteasome	0	0	1.49	-1.8357	3.33	-3.615	0	0	2	3	0	0	0	0	0	0	2	0	3	0	0	0	0	0	0	0	0	224470	0	0	0	0	0	0	0	0	2918100	13	224470	Tb927.7.4790;Tb11.v5.0162	Tb927.7.4790_proteasome beta 6 subunit,20S proteasome beta 6 subunit, putative (BETA6) | location=Tb927_07_v5.1:1266772-1267570(-) | length=258 | sequence_SO=chromosome | SO=protein_coding;Tb11.v5.0162 | orga
Tb927.10.12330	ZC3H34	RNA.binding	0	1	1.03	0.649	3.31	3.4816	0	3	1	8	8	3	6	0	0	0	2	3	2	6244200	2642900	5006700	0	0	0	1198600	2207600	729730	58419000	32354000	48001000	0	0	0	20561000	25949000	13045000	11	18030000	Tb927.10.12330	Tb927.10.12330_zinc finger protein family member, putative (ZC3H34) | location=Tb927_10_v5.1:2992296-2992904(-) | length=202 | sequence_SO=chromosome | SO=protein_coding
Tb11.v5.0768	aspartyl aminopeptidase, putative	Enzyme	0	0	0.75	-0.9354	3.3	-3.4772	0	0	2	1	1	0	0	0	0	0	0	0	0	105120	0	0	0	0	0	0	0	0	1051200	0	0	0	0	0	0	0	0	10	105120	Tb11.v5.0768;Tb927.3.3410	Tb11.v5.0768_aspartyl aminopeptidase, putative | location=Tb927_11_bin_v5.1:4011150-4012043(+) | length=297 | sequence_SO=random_sequence | SO=protein_coding;Tb927.3.3410 | organism=Trypanosoma_brucei_TREU927
Tb927.10.8170	TbNup144 Outer-inner connect	Nuclear.transport	1	0	2.07	4.1529	3.3	-6.1245	35	0	1	40	17	16	0	13	35	27	0	0	0	1065400	1217200	0	789700	3953500	2701600	0	0	0	76802000	82847000	0	65883000	199490000	129450000	0	0	0	57	9727500	Tb927.10.8170	Tb927.10.8170_nuclear pore complex protein (NUP155), putative,nucleoporin, putative | location=Tb927_10_v5.1:2027678-2031655(-) | length=1325 | sequence_SO=chromosome | SO=protein_coding
Tb927.10.560	40S ribosomal protein S11	Ribosome	0	0	1.18	-3.0223	3.3	-3.0572	0	0	1	8	0	0	0	0	0	0	0	0	2	0	0	0	0	0	0	0	0	3467400	0	0	0	0	0	0	0	0	31207000	9	3467400	Tb927.10.560	Tb927.10.560_40S ribosomal proteins S11, putative | location=Tb927_10_v5.1:147113-147637(+) | length=174 | sequence_SO=chromosome | SO=protein_coding
Tb927.11.1300	UBA/TS-N domain containing protein, putative	ZUnknown	0	0	6.08	-6.4341	3.3	-3.525	0	0	1	6	0	0	0	0	0	0	6	2	5	0	0	0	0	0	0	2817300	889810	2434200	0	0	0	0	0	0	31647000	12549000	29500000	12	6141400	Tb927.11.1300	Tb927.11.1300_hypothetical protein, conserved | location=Tb927_11_v5.1:380693-381775(+) | length=360 | sequence_SO=chromosome | SO=protein_coding
Tb927.11.15910	iron superoxide dismutase	Redox	0	0	0.728	1.1195	3.29	-1.9905	1	1	1	2	2	1	1	0	1	1	0	0	1	771070	256310	445280	0	104910	356790	0	0	434890	7710700	0	0	0	0	0	0	0	0	10	2369300	Tb927.11.15910	Tb927.11.15910_iron superoxide dismutase | location=Tb927_11_v5.1:4210619-4211215(-) | length=198 | sequence_SO=chromosome | SO=protein_coding
Tb927.8.7270	Endoplasmic Reticulum-Golgi Intermediate Compartment (ERGIC)/Endoplasmic reticulum vesicle transporter, putative	Vesicular.transport	0	0	2.08	-2.3475	3.28	-3.4698	0	0	1	2	0	0	0	0	0	0	2	1	0	0	0	0	0	0	0	339360	76010	0	0	0	0	0	0	0	5090400	0	0	15	415370	Tb927.8.7270	Tb927.8.7270_hypothetical protein, conserved | location=Tb927_08_v5.1:2086681-2089416(+) | length=405 | sequence_SO=chromosome | SO=protein_coding
Tb927.11.11090	TbNup140 Nup76 complex, FG, symmetric, interact MEX67	Nuclear.transport	1	1	5.46	6.1984	3.26	3.986	0	7	1	9	7	8	8	0	0	0	0	0	0	4481000	2383400	2769800	0	0	0	0	0	0	261760000	131670000	146090000	0	0	0	0	0	0	56	9634200	Tb927.11.11090	Tb927.11.11090_Nucleoporin (TbNup140) | location=Tb927_11_v5.1:2971402-2975796(+) | length=1464 | sequence_SO=chromosome | SO=protein_coding
Tb927.9.8720	fructose-1,6-bisphosphatase (FBPase)	Glucose.glycerol	1	1	3.77	3.5961	3.24	4.5946	0	8	1	11	9	11	8	0	0	0	1	2	4	5902300	14672000	3548800	0	0	0	99851	295260	633460	92804000	192970000	59823000	0	0	0	0	5561200	12358000	15	25151000	Tb927.9.8720	Tb927.9.8720_fructose-1,6-bisphosphatase (FBPase) | location=Tb927_09_v5.1:1405055-1406107(-) | length=350 | sequence_SO=chromosome | SO=protein_coding
Tb927.11.15370	importin beta subunit beta-4 KAP123	Nuclear.transport	0	0	0.103	0.1979	3.24	-3.3851	3	0	1	4	0	0	0	0	0	3	0	1	1	0	0	0	0	0	50456	0	12029	23756	0	0	0	0	0	2472300	0	0	0	49	86240	Tb927.11.15370	Tb927.11.15370_hypothetical protein, conserved (TbKap123) | location=Tb927_11_v5.1:4073557-4078384(-) | length=1072 | sequence_SO=chromosome | SO=protein_coding
Tb927.10.12930	hypothetical protein, conservedn no domains or good BLASTp hits	ZUnknown	0	0	0.21	-0.4669	3.24	-4.1693	2	0	1	3	1	0	1	0	2	2	1	1	0	405100	0	292120	0	275400	253370	147340	143420	0	0	0	0	0	4123600	3808100	0	0	0	15	1516700	Tb927.10.12930	Tb927.10.12930_hypothetical protein, conserved | location=Tb927_10_v5.1:3142917-3143540(-) | length=207 | sequence_SO=chromosome | SO=protein_coding
Tb927.7.180	Trypanosomal VSG domain containing protein, putative	ZUnknown	0	0	0.201	-0.3469	3.24	-3.1434	1	0	1	2	0	0	0	0	1	1	0	0	0	0	0	0	0	77606	38744	0	0	0	0	0	0	0	0	852360	0	0	0	22	116350	Tb927.7.180	Tb927.7.180_hypothetical protein | location=Tb927_07_v5.1:27107-28420(-) | length=437 | sequence_SO=chromosome | SO=protein_coding
Tb927.9.3400	endo-beta-N-acetylglucosaminidase, putative	Glycans	0	0	5.05	-5.6897	3.2	-3.3515	1	0	1	18	0	0	0	0	1	1	18	8	14	0	0	0	0	21907	59905	1089600	344920	914760	0	0	0	0	0	0	51449000	27893000	49866000	55	2431100	Tb927.9.3400	Tb927.9.3400_endo-beta-N-acetylglucosaminidase, putative | location=Tb927_09_v5.1:704087-707242(+) | length=1051 | sequence_SO=chromosome | SO=protein_coding
Tb927.11.13280	mitochondrial RNA binding protein 2 (GBP25)	Mito.RNA	0	0	0.809	-0.86	3.2	-3.3236	0	0	1	2	2	1	0	0	0	0	0	0	0	220840	124970	0	0	0	0	0	0	0	2870900	0	0	0	0	0	0	0	0	13	345810	Tb927.11.13280	Tb927.11.13280_mitochondrial RNA binding protein 2 (GBP25) | location=Tb927_11_v5.1:3562194-3562868(-) | length=224 | sequence_SO=chromosome | SO=protein_coding
Tb927.4.2380	sarcoplasmic reticulum glycoprotein, putative	ZUnknown	0	0	0.848	-1.3875	3.19	-3.5373	1	1	1	2	1	1	1	0	0	1	0	0	1	107950	0	85805	0	0	94383	0	0	120540	0	0	0	0	0	0	0	0	3133900	26	408670	Tb927.4.2380	Tb927.4.2380_sarcoplasmic reticulum glycoprotein, putative | location=Tb927_04_v5.1:613831-615705(+) | length=624 | sequence_SO=chromosome | SO=protein_coding
Tb927.10.12890	bifunctional aminoacyl-tRNA synthetase, putative	Translation.tRNA	0	0	0.0354	-0.0848	3.17	-3.6073	2	0	1	5	1	0	1	0	1	2	0	0	2	22865	0	50849	0	21815	105460	0	0	86309	0	0	0	0	0	5483800	0	0	0	52	287300	Tb927.10.12890	Tb927.10.12890_bifunctional aminoacyl-tRNA synthetase, putative | location=Tb927_10_v5.1:3132295-3134721(-) | length=808 | sequence_SO=chromosome | SO=protein_coding
Tb927.9.10310	mitochondrial carrier protein, MCP11, phosphate	Mito.transport	0	0	1.99	-1.656	3.14	-6.0499	4	0	1	4	0	0	0	4	1	1	0	0	0	0	0	0	884520	56305	50248	0	0	0	0	0	0	15037000	0	0	0	0	0	17	991080	Tb927.9.10310	Tb927.9.10310_mitochondrial carrier protein (MCP11) | location=Tb927_09_v5.1:1619646-1621538(-) | length=317 | sequence_SO=chromosome | SO=protein_coding
Tb927.8.2200	terbinafine resistance locus protein (yip1), putative	ZUnknown	0	0	1.14	-1.1937	3.12	-5.5248	1	0	1	1	0	0	0	1	1	1	0	0	0	0	0	0	1083700	264970	286750	0	0	0	0	0	0	0	0	1433700	0	0	0	5	1635400	Tb927.8.2200	Tb927.8.2200_terbinafine resistance locus protein (yip1), putative | location=Tb927_08_v5.1:676674-677243(+) | length=189 | sequence_SO=chromosome | SO=protein_coding
Tb927.10.5140	protein kinase, putative,mitogen-activated protein kinase 2, putative	Protein.kinase	0	0	0.0188	-0.0405	3.11	-3.5099	1	0	1	2	0	0	0	0	1	1	0	0	0	0	0	0	0	79102	53744	0	0	0	0	0	0	0	2294000	0	0	0	0	29	132850	Tb927.10.5140	Tb927.10.5140_protein kinase, putative,mitogen-activated protein kinase 2, putative | location=Tb927_10_v5.1:1261399-1262727(+) | length=442 | sequence_SO=chromosome | SO=protein_coding
Tb927.11.18680	dynein light chain LC8, putative (DYNLL1)	RNA.synthesis	0	0	0.463	-0.8208	3.1	-4.4258	1	0	2	1	0	0	0	0	0	1	0	0	0	0	0	0	0	0	620000	0	0	0	0	0	0	0	0	2480000	0	0	0	4	620000	Tb927.11.18680;Tb11.0845	Tb927.11.18680_dynein light chain LC8, putative (DYNLL1) | location=Tb927_11_Homologues_1_v5.1:993-1265(-) | length=90 | sequence_SO=chromosome | SO=protein_coding;Tb11.0845 | organism=Trypanosoma_brucei_TREU
Tb927.11.6170	protein transport protein Sec31, putative,cytosolic coat protein, putative	Vesicular.transport	0	0	1.01	-1.7063	3.07	-4.0121	0	0	1	2	0	0	0	0	0	0	1	0	2	0	0	0	0	0	0	26215	0	59905	0	0	0	0	0	0	0	0	2695700	45	86121	Tb927.11.6170	Tb927.11.6170_protein transport protein SEC31, putative,cytosolic coat protein, putative | location=Tb927_11_v5.1:1737795-1741490(-) | length=1231 | sequence_SO=chromosome | SO=protein_coding
Tb08.27P2.160	ESAG3 pseudogene	ESAG.pseudo	0	0	2.51	-4.1531	3.06	-3.3888	1	0	12	3	0	0	0	0	0	1	3	2	2	0	0	0	0	0	521010	1956900	1226900	120540	0	0	0	0	0	0	27825000	26298000	0	17	3825300	Tb08.27P2.160;Tb11.0700;Tb927.9.620;Tb10.v4.0147;Tb08.27P2.520;Tb927.11.19900;Tb927.3.430;Tb10.v4.0101;Tb09.v4.0172;Tb927.11.20150;Tb927.11.17180;Tb927.1.5340	Tb08.27P2.160_expression site-associated gene (ESAG, pseudogene), putative,expression site-associated gene 3 (ESAG3), degenerate,BAC from homologous region on chr8 | location=Tbrucei.chr8.100:22974-24068(-) |
Tb927.10.1930	hypothetical protein, conserved	Mito.pathway	0	0	1.02	-1.0733	3.06	-3.4687	0	0	1	1	1	0	0	0	0	0	0	0	0	62676	0	0	0	0	0	0	0	0	2444400	0	0	0	0	0	0	0	0	39	62676	Tb927.10.1930	Tb927.10.1930_hypothetical protein, conserved | location=Tb927_10_v5.1:504445-506388(+) | length=647 | sequence_SO=chromosome | SO=protein_coding
Tb927.5.1090	threonyl-tRNA synthetase, putative	Translation.tRNA	0	0	1.16	-1.3213	3.06	-3.4569	1	0	1	2	2	0	0	0	0	1	0	0	0	63863	0	0	0	0	13826	0	0	0	2937700	0	0	0	0	0	0	0	0	46	77689	Tb927.5.1090	Tb927.5.1090_threonyl-tRNA synthetase, putative | location=Tb927_05_v5.1:409463-412112(+) | length=799 | sequence_SO=chromosome | SO=protein_coding
Tb927.10.2640	intraflagellar transport protein IFT81	Cytoskeleton	0	0	1.13	-1.2737	3.03	-3.6933	0	0	1	1	1	1	0	0	0	0	0	0	0	23251	17019	0	0	0	0	0	0	0	0	765840	0	0	0	0	0	0	0	45	40270	Tb927.10.2640	Tb927.10.2640_intraflagellar transport protein IFT81, putative | location=Tb927_10_v5.1:681379-683601(+) | length=740 | sequence_SO=chromosome | SO=protein_coding
Tb927.3.2100	hypothetical protein, conserved	ZUnknown	0	0	0.371	-0.415	3.02	-2.5618	1	0	1	3	2	0	0	0	0	1	0	0	0	151470	0	0	0	0	0	0	0	0	3029500	0	0	0	0	0	0	0	0	20	151470	Tb927.3.2100	Tb927.3.2100_hypothetical protein, conserved | location=Tb927_03_v5.1:552283-553221(-) | length=308 | sequence_SO=chromosome | SO=protein_coding
Tb927.3.1120	Ran or RTB2	Nuclear.transport	0	0	1.99	2.9283	3	-1.5198	6	7	1	10	9	9	7	2	4	6	2	2	4	4991100	4942200	2306600	466800	798220	1549600	279260	245440	831330	58913000	47319000	27949000	9248300	11561000	19058000	0	0	16580000	12	16410000	Tb927.3.1120	Tb927.3.1120_GTP-binding nuclear protein rtb2, putative (rtb2) | location=Tb927_03_v5.1:273590-274243(+) | length=217 | sequence_SO=chromosome | SO=protein_coding
Tb927.11.2470	aminopeptidase, putative,metallo-peptidase, Clan MF, Family M17	Protease	0	0	0.395	-0.8258	3	-2.7156	0	0	1	2	2	0	1	0	0	0	0	0	1	74181	0	51498	0	0	0	0	0	72592	0	0	0	0	0	0	0	0	1887400	26	198270	Tb927.11.2470	Tb927.11.2470_aminopeptidase, putative,metallo-peptidase, Clan MF, Family M17 | location=Tb927_11_v5.1:725560-727257(-) | length=565 | sequence_SO=chromosome | SO=protein_coding
Tb927.4.3540	conserved, found in PRP19 pull-down	RNA.processing	0	1	0.204	0.2205	2.99	2.2861	0	4	1	7	7	4	6	0	0	0	5	5	2	3024500	1411400	1781700	0	0	0	1146900	1847100	258370	47471000	30284000	29314000	0	0	0	19634000	32683000	11075000	18	9470000	Tb927.4.3540	Tb927.4.3540_hypothetical protein, conserved | location=Tb927_04_v5.1:910312-911456(-) | length=379 | sequence_SO=chromosome | SO=protein_coding
Tb927.11.9940	hypothetical protein, conserved	ZUnknown	1	1	5.86	4.353	2.99	3.2347	0	3	1	7	5	3	5	0	0	0	0	0	0	3164700	1692900	2972700	0	0	0	0	0	0	29563000	15098000	25811000	0	0	0	0	0	0	9	7830300	Tb927.11.9940	Tb927.11.9940_hypothetical protein, conserved | location=Tb927_11_v5.1:2679883-2680443(+) | length=186 | sequence_SO=chromosome | SO=protein_coding
Tb927.3.1150	Conserved hypothetical ATP binding protein, putative	ZUnknown	0	0	1.87	-2.032	2.97	-2.9482	0	0	1	2	0	0	0	0	0	0	2	0	0	0	0	0	0	0	0	393890	0	0	0	0	0	0	0	0	4332800	0	0	11	393890	Tb927.3.1150	Tb927.3.1150_hypothetical protein, conserved | location=Tb927_03_v5.1:279975-280817(+) | length=280 | sequence_SO=chromosome | SO=protein_coding
Tb927.10.14930	ZC3H39	RNA.binding	0	1	0.481	-0.6815	2.96	2.7478	0	4	1	10	7	7	4	0	0	0	7	10	2	3580700	2394500	699630	0	0	0	2467700	4823500	352240	47841000	33673000	16695000	0	0	0	32977000	61311000	7958700	14	14318000	Tb927.10.14930	Tb927.10.14930_zinc finger protein family member, putative (ZC3H39) | location=Tb927_10_v5.1:3649025-3649882(+) | length=285 | sequence_SO=chromosome | SO=protein_coding
Tb927.11.16530	hypothetical protein, conserved	Mito.pathway	0	0	0.975	-0.9764	2.95	-2.9889	0	0	1	1	1	0	0	0	0	0	0	0	0	0	0	0	0	0	0	0	0	0	0	0	0	0	0	0	0	0	0	52	0	Tb927.11.16530	Tb927.11.16530_hypothetical protein, conserved | location=Tb927_11_v5.1:4377515-4380721(-) | length=1068 | sequence_SO=chromosome | SO=protein_coding
Tb927.2.1210	retrotransposon hot spot protein 4 (RHS4), putative	RHS	0	0	1.61	-2.2542	2.94	-3.7086	1	1	1	2	1	1	1	0	0	1	1	1	1	115210	96337	109790	0	0	83812	75478	63967	78476	0	0	0	0	0	0	0	0	3845300	49	623070	Tb927.2.1210	Tb927.2.1210_retrotransposon hot spot protein 4 (RHS4), putative | location=Tb927_02_v5.1:219959-222484(-) | length=841 | sequence_SO=chromosome | SO=protein_coding
Tb927.9.3990	40S ribosomal protein S7	Ribosome	0	0	1.12	-3.4051	2.94	-2.9546	0	0	2	11	0	1	0	0	0	0	0	0	11	0	145520	0	0	0	0	0	0	10296000	0	0	0	0	0	0	0	0	113260000	11	10442000	Tb927.9.3990;Tb927.9.3920	Tb927.9.3990_ribosomal protein S7, putative | location=Tb927_09_v5.1:771263-771871(+) | length=202 | sequence_SO=chromosome | SO=protein_coding;Tb927.9.3920_rib
Tb927.3.910	gamma-tubulin	Cytoskeleton	0	0	0.0612	-0.1117	2.93	-3.0004	2	0	1	2	0	0	0	0	0	2	0	0	0	0	0	0	0	0	42714	0	0	0	0	0	0	0	0	939710	0	0	0	22	42714	Tb927.3.910	Tb927.3.910_gamma-tubulin,tubulin gamma chain | location=Tb927_03_v5.1:211340-212683(+) | length=447 | sequence_SO=chromosome | SO=protein_coding
Tb927.4.4550	PuREBP1	RNA.binding	0	0	1.21	-2.0425	2.93	-3.217	0	0	1	5	0	0	0	0	0	0	2	0	4	0	0	0	0	0	0	58124	0	287810	0	0	0	0	0	0	0	0	8981500	38	345930	Tb927.4.4550	Tb927.4.4550_hypothetical protein, conserved | location=Tb927_04_v5.1:1249907-1252378(-) | length=823 | sequence_SO=chromosome | SO=protein_coding
Tb927.11.14090	DRBD18	RNA.binding	1	1	9.17	12.3522	2.93	6.9332	4	27	1	29	28	27	27	4	2	2	4	7	3	868810000	629210000	597250000	3451900	1299100	473670	299370	46269	0	15334000000	11848000000	10240000000	65613000	0	0	0	0	0	19	2100800000	Tb927.11.14090	Tb927.11.14090_hypothetical protein, conserved | location=Tb927_11_v5.1:3731214-3732656(+) | length=480 | sequence_SO=chromosome | SO=protein_coding
Tb927.2.1080	retrotransposon hot spot protein 5 (RHS5), putative	RHS	0	0	0.257	-0.4916	2.92	-3.4157	0	0	8	7	3	1	0	0	0	0	0	0	0	128120	36818	0	0	0	0	0	0	0	5381100	0	0	0	0	0	0	0	0	42	164940	Tb927.2.1080;Tb11.1790;Tb927.2.240;Tb927.4.250;Tb927.1.420;Tb927.2.1170;Tb927.6.140;Tb11.v5.0567	Tb927.2.1080_retrotransposon hot spot protein 5 (RHS5), putative | location=Tb927_02_v5.1:179639-181663(-) | length=674 | sequence_SO=chromosome | SO=protein_coding;Tb11.1790 | organism=Trypanosoma_brucei_TRE
Tb927.11.14950	ZFP2	RNA.binding	1	1	3.15	5.411	2.92	4.023	0	1	1	2	1	1	1	0	0	0	0	1	0	12140000	8588100	16891000	0	0	0	0	1706000	0	47965000	35082000	67431000	0	0	0	0	0	0	4	39325000	Tb927.11.14950	Tb927.11.14950_zinc finger protein 2 (ZFP2) | location=Tb927_11_v5.1:3977262-3977681(-) | length=139 | sequence_SO=chromosome | SO=protein_coding
Tb927.10.7910	MERS3 component of MERS complex	Mito.pathway	1	1	4.88	5.644	2.91	3.6383	0	6	1	7	7	6	6	0	0	0	0	1	0	7770000	4940000	4942300	0	0	0	0	253840	0	84653000	56097000	53426000	0	0	0	0	0	0	11	17906000	Tb927.10.7910	Tb927.10.7910_hypothetical protein, conserved | location=Tb927_10_v5.1:1977775-1978344(-) | length=189 | sequence_SO=chromosome | SO=protein_coding
Tb927.9.12240	60S ribosomal protein L31	Ribosome	0	0	2.33	-2.6835	2.91	-3.2546	0	0	2	1	0	0	0	0	0	0	0	0	1	0	0	0	0	0	0	0	0	739510	0	0	0	0	0	0	0	0	4437000	6	739510	Tb927.9.12240;Tb927.9.12200	Tb927.9.12240_unspecified product | location=Tb927_09_v5.1:1908465-1909031(+) | length=188 | sequence_SO=chromosome | SO=protein_coding;Tb927.9.12200_unspecifie
Tb927.7.800	REMC3 mitochondrial RNA binding complex 1 subunit (MRB800)	Mito.RNA	1	1	4.25	4.8325	2.89	2.4686	0	6	1	11	11	6	8	0	0	0	0	0	0	2513500	1096800	1806600	0	0	0	0	0	0	55813000	37097000	47932000	0	0	0	0	0	0	26	5417000	Tb927.7.800	Tb927.7.800_mitochondrial RNA binding complex 1 subunit (MRB800) | location=Tb927_07_v5.1:181258-182889(-) | length=543 | sequence_SO=chromosome | SO=protein_coding
Tb927.11.6230	pretranslocation protein, alpha subunit, SEC61	Vesicular.transport	0	0	0.757	-0.8998	2.89	-5.765	2	0	1	2	1	1	0	2	1	1	0	0	0	83607	74091	0	903610	200880	109170	0	0	0	0	0	0	15361000	0	0	0	0	0	17	1371400	Tb927.11.6230	Tb927.11.6230_pretranslocation protein, alpha subunit, putative,SEC61-like (pretranslocation process) protein, putative | location=Tb927_11_v5.1:1752269-1753714(-) | length=481 | sequence_SO=chromosome | SO=p
Tb927.6.1880	aspartyl-tRNA synthetase, putative	Translation.tRNA	0	0	0.554	-0.8838	2.88	-2.8707	1	1	1	3	1	1	1	0	0	1	0	0	0	0	100810	49978	0	0	40545	0	0	0	0	0	1599300	0	0	0	0	0	0	32	191330	Tb927.6.1880	Tb927.6.1880_aspartyl-tRNA synthetase, putative | location=Tb927_06_v5.1:623782-625464(-) | length=560 | sequence_SO=chromosome | SO=protein_coding
Tb927.11.16110	FG-GAP repeat protein, putative,intergrin alpha chain protein, putative	Cytoskeleton	0	0	1.26	-2.3068	2.87	-3.2224	0	0	1	6	0	0	0	0	0	0	6	2	1	0	0	0	0	0	0	840180	76973	44218	0	0	0	0	0	0	25205000	0	0	30	961370	Tb927.11.16110	Tb927.11.16110_integrin alpha chain protein, putative | location=Tb927_11_v5.1:4265056-4268758(-) | length=703 | sequence_SO=chromosome | SO=protein_coding
Tb927.1.4690	arginine N-methyltransferase (PRMT1)	Arg.methylation	0	0	0.646	-1.0858	2.85	-3.4218	0	0	1	1	1	0	0	0	0	0	0	0	0	108220	0	0	0	0	0	0	0	0	1515100	0	0	0	0	0	0	0	0	14	108220	Tb927.1.4690	Tb927.1.4690_arginine N-methyltransferase (PRMT1) | location=Tb927_01_v5.1:964186-965223(+) | length=345 | sequence_SO=chromosome | SO=protein_coding
Tb927.9.15190	60S ribosomal protein L15	Ribosome	0	0	0.926	-2.7061	2.85	-3.1965	0	0	2	2	0	0	0	0	0	0	0	0	2	0	0	0	0	0	0	0	0	4562000	0	0	0	0	0	0	0	0	31934000	7	4562000	Tb927.9.15190;Tb927.6.5040	Tb927.9.15190_ribosomal protein L15, putative | location=Tb927_09_v5.1:2361569-2362183(+) | length=204 | sequence_SO=chromosome | SO=protein_coding;Tb927.6.5040 | organism=Trypanosoma_brucei_TREU927 | product
Tb927.3.3270	ATP-dependent phosphofructokinase (TbPFK)	Glucose.glycerol	0	1	0.341	-0.3051	2.84	3.8385	8	27	1	39	29	37	27	0	6	8	28	32	25	26556000	71334000	14507000	0	342200	1202000	20558000	27720000	15893000	683090000	1707600000	416860000	0	9909900	32461000	500360000	717160000	385310000	25	178110000	Tb927.3.3270	Tb927.3.3270_ATP-dependent phosphofructokinase (TbPFK) | location=Tb927_03_v5.1:839799-841262(-) | length=487 | sequence_SO=chromosome | SO=protein_coding
Tb927.1.700	phosphoglycerate kinase (PGKC)	Glucose.glycerol	0	1	0.0883	0.0523	2.84	4.0444	9	22	2	33	29	30	22	0	2	9	23	21	19	26712000	32120000	16553000	0	97258	1612000	15504000	10805000	11744000	729990000	785650000	471250000	0	2845700	55474000	433460000	303370000	314950000	27	115150000	Tb927.1.700;Tb927.1.720	Tb927.1.700_phosphoglycerate kinase (PGKC) | location=Tb927_01_v5.1:231788-233110(-) | length=440 | sequence_SO=chromosome | SO=protein_coding
Tb927.10.1510	NOT1	RNA.degradation	0	0	0.0994	-0.1557	2.84	-3.5231	3	0	1	5	0	0	0	1	1	3	0	0	0	0	0	0	7214.2	13900	17557	0	0	0	0	0	0	0	0	2300000	0	0	0	131	38671	Tb927.10.1510	Tb927.10.1510_NOT1 (NOT1) | location=Tb927_10_v5.1:405276-412256(-) | length=2326 | sequence_SO=chromosome | SO=protein_coding
Tb927.10.4170	CAP292 Clathrin-associated protein, resembles yeast myosins, homologue of centrosome-associated protein CEP250	Cytoskeleton	0	0	0.335	-0.5448	2.83	-3.1273	0	0	1	1	0	1	0	0	0	0	0	0	0	0	0	0	0	0	0	0	0	0	0	0	0	0	0	0	0	0	0	145	0	Tb927.10.4170	Tb927.10.4170_hypothetical protein, conserved | location=Tb927_10_v5.1:1091207-1098826(-) | length=2539 | sequence_SO=chromosome | SO=protein_coding
Tb927.11.16860	mitochondrial RNA binding protein (MRB8620)	Mito.RNA	1	1	6.68	6.631	2.83	3.603	0	13	1	20	18	13	15	0	0	0	0	0	0	4646100	2449400	3475700	0	0	0	0	0	0	121550000	73834000	100610000	0	0	0	0	0	0	28	10571000	Tb927.11.16860	Tb927.11.16860_mitochondrial RNA binding protein (MRB8620) | location=Tb927_11_v5.1:4491811-4493259(-) | length=482 | sequence_SO=chromosome | SO=protein_coding
Tb927.11.15900	60S ribosomal protein L27	Ribosome	0	0	0.992	-2.4035	2.83	-3.7765	0	0	2	3	0	0	0	0	0	0	0	0	3	0	0	0	0	0	0	0	0	2155600	0	0	0	0	0	0	0	0	15089000	7	2155600	Tb927.11.15900;Tb927.11.15880	Tb927.11.15900_60S ribosomal protein L27, putative | location=Tb927_11_v5.1:4209843-4210244(-) | length=133 | sequence_SO=chromosome | SO=protein_coding;Tb927.11.15880 | organism=Trypanosoma_brucei_TREU927 |
Tb927.10.1490	MKT1L	RNA.degradation	0	0	0.77	-1.0056	2.83	-3.2058	0	0	1	1	0	0	0	0	0	0	1	0	1	0	0	0	0	0	0	29477	0	28894	0	0	0	0	0	0	0	0	1271300	44	58371	Tb927.10.1490	Tb927.10.1490_hypothetical protein, conserved | location=Tb927_10_v5.1:394070-397732(-) | length=1220 | sequence_SO=chromosome | SO=protein_coding
Tb927.11.10910	40S ribosomal protein SA	Ribosome	0	1	1.19	-1.544	2.82	3.1561	0	3	2	7	3	4	4	0	0	0	3	3	7	1207900	4106800	4951000	0	0	0	4140700	2131000	12766000	25899000	82619000	54682000	0	0	0	63205000	32607000	151240000	14	29304000	Tb927.11.10910;Tb927.11.10790	Tb927.11.10910_40S ribosomal protein SA, putative | location=Tb927_11_v5.1:2911268-2912002(+) | length=244 | sequence_SO=chromosome | SO=protein_coding;Tb927.11.10790 | organism=Trypanosoma_brucei_TREU927 | p
Tb927.9.1850	60S ribosomal protein L35	Ribosome	0	0	0.584	-1.3184	2.81	-2.2424	0	0	2	1	0	0	0	0	0	0	0	0	1	0	0	0	0	0	0	0	0	1057800	0	0	0	0	0	0	0	0	2115500	2	1057800	Tb927.9.1850;Tb927.9.1810	Tb927.9.1850_60S ribosomal protein L35, putative | location=Tb927_09_v5.1:427517-428242(-) | length=127 | sequence_SO=chromosome | SO=protein_coding;Tb927.9.1810 | organism=Trypanosoma_brucei_TREU927 | produc
Tb927.11.11520	PEX11 glycosomal membrane protein	Glycosome	0	0	0.738	-1.183	2.8	-5.3071	4	0	1	4	1	1	0	0	4	0	0	0	0	234600	148390	0	0	902740	0	0	0	0	0	0	0	0	11736000	0	0	0	0	13	1285700	Tb927.11.11520	Tb927.11.11520_glycosomal membrane protein (PEX11) | location=Tb927_11_v5.1:3086741-3087397(+) | length=218 | sequence_SO=chromosome | SO=protein_coding
Tb927.10.14030	hypothetical protein, conserved, in Golgi and ER	ZUnknown	0	0	0.665	-0.9427	2.8	-3.8514	0	0	1	2	1	0	1	0	0	0	0	0	0	77499	0	80852	0	0	0	0	0	0	0	0	1536200	0	0	0	0	0	0	19	158350	Tb927.10.14030	Tb927.10.14030_hypothetical protein, conserved | location=Tb927_10_v5.1:3417608-3418957(-) | length=449 | sequence_SO=chromosome | SO=protein_coding
Tb927.5.3400	calcium-translocating P-type ATPase, calcium pump	Ions	0	0	0.0656	-0.1735	2.79	-3.5051	3	2	1	6	2	4	2	0	3	1	0	0	0	50784	196280	35165	0	66875	65039	0	0	0	0	8115600	0	0	4252700	0	0	0	0	47	414140	Tb927.5.3400	Tb927.5.3400_calcium-translocating P-type ATPase,calcium pump | location=Tb927_05_v5.1:1131431-1134466(-) | length=1011 | sequence_SO=chromosome | SO=protein_coding
Tb927.3.1010	hypothetical protein, conserved, Trypanosoma-specific	ZUnknown	0	0	0.991	-1.1111	2.79	-3.4417	0	0	1	2	2	0	1	0	0	0	0	0	0	84421	0	35472	0	0	0	0	0	0	3039100	0	0	0	0	0	0	0	0	36	119890	Tb927.3.1010	Tb927.3.1010_hypothetical protein, conserved | location=Tb927_03_v5.1:246909-248711(+) | length=600 | sequence_SO=chromosome | SO=protein_coding
Tb927.7.1730	60S ribosomal protein L7	Ribosome	0	0	0.965	-2.2325	2.78	-3.3083	0	0	3	2	0	0	0	0	0	0	0	0	2	0	0	0	0	0	0	0	0	943990	0	0	0	0	0	0	0	0	11328000	12	943990	Tb927.7.1730;Tb927.7.1750;Tb927.7.1740	Tb927.7.1730_60S ribosomal protein L7, putative | location=Tb927_07_v5.1:429045-429773(+) | length=242 | sequence_SO=chromosome | SO=protein_coding;Tb927.7.1750 | organism=Trypanosoma_brucei_TREU927 | product
Tb927.11.9640	glycyl-tRNA synthetase, putative	Translation.tRNA	0	0	0.132	-0.2449	2.78	-3.0871	1	1	1	4	3	1	1	0	0	1	0	0	1	94958	54535	45158	0	0	37942	0	0	40494	3228600	0	0	0	0	0	0	0	0	34	273090	Tb927.11.9640	Tb927.11.9640_glycyl-tRNA synthetase, putative | location=Tb927_11_v5.1:2620223-2622097(-) | length=624 | sequence_SO=chromosome | SO=protein_coding
Tb927.1.3950	D-alanine aminotransferase (ALAT)	Mito.pathway	0	0	1.38	-2.1663	2.77	-3.1433	2	1	1	5	2	1	1	0	1	2	0	2	4	329610	97045	310210	0	35726	212800	0	169360	464540	0	0	0	0	0	0	0	5765900	11983000	28	1619300	Tb927.1.3950	Tb927.1.3950_alanine aminotransferase (ALAT) | location=Tb927_01_v5.1:840877-842391(+) | length=504 | sequence_SO=chromosome | SO=protein_coding
Tb927.11.8060	SNARE associated Golgi protein, putative	ZUnknown	0	0	0.379	-0.7843	2.77	-5.8785	6	0	1	6	0	0	0	6	1	0	0	0	0	0	0	0	1135200	43524	0	0	0	0	0	0	0	20434000	0	0	0	0	0	18	1178700	Tb927.11.8060	Tb927.11.8060_hypothetical protein, conserved | location=Tb927_11_v5.1:2262466-2264187(+) | length=573 | sequence_SO=chromosome | SO=protein_coding
Tb927.8.2540	3-ketoacyl-CoA thiolase, putative	Lipids	0	0	1.06	-1.331	2.76	-3.4477	1	0	1	1	0	0	1	0	0	1	0	1	1	0	0	131930	0	0	84850	0	48837	82803	0	0	0	0	0	0	0	0	1821700	22	348420	Tb927.8.2540	Tb927.8.2540_3-ketoacyl-CoA thiolase, putative | location=Tb927_08_v5.1:749535-750851(+) | length=438 | sequence_SO=chromosome | SO=protein_coding
Tb927.5.4560	guanine deaminase, putative	Nucleotides	0	0	0.0676	-0.1489	2.76	-3.4129	1	0	3	2	2	0	0	0	0	1	0	0	1	97854	0	0	0	0	27227	0	0	51445	2739900	0	0	0	0	0	0	0	0	28	176530	Tb927.5.4560;Tb11.v5.0409;Tb05.5K5.200	Tb927.5.4560_guanine deaminase, putative,guanase, putative,guanine aminase, putative,guanine aminohydrolase, putative | location=Tb927_05_v5.1:1410838-1412388(+) | length=516 | sequence_SO=chromosome | SO=pro
Tb927.10.10590	histone H2B	Chromatin	1	1	0.33	-0.4488	2.75	2.7797	1	2	14	5	3	4	2	0	1	0	2	3	5	2642100	7128200	1764100	0	0	0	1549500	1508600	4237700	19313000	45070000	22827000	0	0	0	19154000	19286000	24991000	8	18830000	Tb927.10.10590;Tb927.10.10580;Tb927.10.10570;Tb927.10.10560;Tb927.10.10550;Tb927.10.10540;Tb927.10.10530;Tb927.10.10520;Tb927.10.10510;Tb927.10.10500;Tb927.10.10490;Tb927.10.10480;Tb927.10.10470;Tb927.10.10460	Tb927.10.10590_histone H2B, putative | location=Tb927_10_v5.1:2584533-2584871(-) | length=112 | sequence_SO=chromosome | SO=protein_coding;Tb927.10.10580_histon
Tb927.10.9770	gamma-tubulin complex subunit GCP2	Cytoskeleton	0	0	2.12	-2.8463	2.75	-3.5766	0	0	2	4	0	0	0	0	0	0	0	0	4	0	0	0	0	0	0	0	0	278730	0	0	0	0	0	0	0	0	10592000	38	278730	Tb927.10.9770;Tb11.v5.0848	Tb927.10.9770_gamma-tubulin complex subunit, putative,spindle pole body protein, putative (GCP2) | location=Tb927_10_v5.1:2419719-2422073(+) | length=784 | sequence_SO=chromosome | SO=protein_coding;Tb11.v5.0
Tb927.3.3610	PEX7 peroxisomal targeting signal type 2 receptor	Glycosome	0	0	5.05	-6.2913	2.74	-3.3439	0	0	1	8	1	0	0	0	0	0	8	3	7	105080	0	0	0	0	0	2294700	678000	2554500	0	0	0	0	0	0	31692000	17927000	38816000	16	5632300	Tb927.3.3610	Tb927.3.3610_peroxisomal targeting signal type 2 receptor, putative,peroxin 7 (PEX7) | location=Tb927_03_v5.1:1014846-1015931(+) | length=361 | sequence_SO=chromosome | SO=protein_coding
Tb927.10.2110	EF1-alpha elongation factor 1-alpha, (TEF1)	Translation	0	0	0.0317	-0.027	2.74	-0.9375	15	19	4	26	24	19	19	8	9	15	16	14	18	74433000	32344000	47962000	3015200	6786900	19723000	25341000	19843000	32408000	1677300000	707270000	1087400000	99313000	208560000	482080000	616790000	550480000	800550000	24	261850000	Tb927.10.2110;Tb927.10.2100;Tb11.v5.1046;Tb927.10.2090	Tb927.10.2110_elongation factor 1-alpha (TEF1) | location=Tb927_10_v5.1:549417-550766(+) | length=449 | sequence_SO=chromosome | SO=protein_coding;Tb927.10.2100 | organism=Trypanosoma_brucei_TREU927 | product
Tb927.7.490	hypothetical protein, conserved, trypanosome-specific	ZUnknown	0	0	0.416	-0.6559	2.74	-3.3823	0	0	1	1	1	1	0	0	0	0	0	0	1	0	0	0	0	0	0	0	0	0	0	0	0	0	0	0	0	0	0	29	0	Tb927.7.490	Tb927.7.490_hypothetical protein, conserved | location=Tb927_07_v5.1:90500-92131(-) | length=543 | sequence_SO=chromosome | SO=protein_coding
Tb927.10.9840	chaperone DNAj, putative, J33	Chaperone	0	0	0.199	-0.3176	2.73	-3.0082	0	0	1	2	0	2	0	0	0	0	0	0	0	0	104120	0	0	0	0	0	0	0	0	1665900	0	0	0	0	0	0	0	16	104120	Tb927.10.9840	Tb927.10.9840_chaperone protein DNAj, putative | location=Tb927_10_v5.1:2433556-2434344(+) | length=262 | sequence_SO=chromosome | SO=protein_coding
Tb927.10.9910	PSP1 C-terminal conserved region, putative	ZUnknown	0	0	6.3	-6.8164	2.73	-3.662	0	0	1	11	0	0	1	0	0	0	11	7	9	0	0	76365	0	0	0	3423600	929900	2399300	0	0	0	0	0	0	61534000	23463000	50059000	20	6829200	Tb927.10.9910	Tb927.10.9910_hypothetical protein, conserved | location=Tb927_10_v5.1:2448024-2449373(+) | length=449 | sequence_SO=chromosome | SO=protein_coding
Tb927.11.13110	hypothetical protein, conserved	ZUnknown	0	0	0.743	-1.6388	2.73	-3.2486	0	0	1	2	0	0	0	0	0	0	2	0	1	0	0	0	0	0	0	100360	0	143310	0	0	0	0	0	0	0	0	3009500	21	243670	Tb927.11.13110	Tb927.11.13110_hypothetical protein, conserved | location=Tb927_11_v5.1:3503025-3504818(-) | length=597 | sequence_SO=chromosome | SO=protein_coding
Tb927.10.10700	splicing factor Prp31	RNA.processing	0	1	0.829	-0.7221	2.71	2.5003	0	3	1	8	5	4	3	0	0	0	7	7	2	2660500	1727600	772030	0	0	0	1868100	2861300	400790	43671000	30082000	15447000	0	0	0	30172000	43630000	11932000	17	10290000	Tb927.10.10700	Tb927.10.10700_splicing factor Prp31 | location=Tb927_10_v5.1:2600742-2601809(-) | length=355 | sequence_SO=chromosome | SO=protein_coding
Tb927.6.4320	Protein of unknown function (DUF2817), putative	ZUnknown	0	0	0.0834	0.1962	2.7	-3.5085	1	0	1	2	1	0	0	0	0	1	0	0	0	55450	0	0	0	0	95673	0	0	0	0	0	0	0	0	2009100	0	0	0	21	151120	Tb927.6.4320	Tb927.6.4320_hypothetical protein, conserved | location=Tb927_06_v5.1:1223763-1224962(-) | length=399 | sequence_SO=chromosome | SO=protein_coding
Tb927.10.12820	Cysteine proteinase domains by interpro but not NCBI	ZUnknown	0	0	0.564	-0.8084	2.7	-2.5733	1	0	1	2	1	1	0	0	0	1	1	0	2	49502	22668	0	0	0	25943	23161	0	105150	0	0	0	0	0	0	0	0	4416400	42	226430	Tb927.10.12820	Tb927.10.12820_hypothetical protein, conserved | location=Tb927_10_v5.1:3112608-3115649(-) | length=1013 | sequence_SO=chromosome | SO=protein_coding
Tb927.3.880	Ankyrin repeats (3 copies), putative	ZUnknown	0	0	0.734	-0.6518	2.7	-2.5661	1	0	1	1	0	0	0	0	0	1	0	1	1	0	0	0	0	0	78097	0	46897	62539	0	0	0	0	0	0	0	0	938090	15	187530	Tb927.3.880	Tb927.3.880_hypothetical protein, conserved | location=Tb927_03_v5.1:207829-208563(+) | length=244 | sequence_SO=chromosome | SO=protein_coding
Tb927.11.280	hypothetical protein, conserved, no domains	ZUnknown	0	1	0.279	0.5487	2.69	2.8825	0	6	1	12	7	6	7	0	0	0	5	8	1	1631500	1523300	1374400	0	0	0	1132300	1763500	390040	53022000	40009000	43972000	0	0	0	34957000	35939000	0	28	7815000	Tb927.11.280	Tb927.11.280_hypothetical protein, conserved | location=Tb927_11_v5.1:64000-65946(-) | length=648 | sequence_SO=chromosome | SO=protein_coding
Tb11.v5.0533	retrotransposon hot spot (RHS) protein, putative	RHS	0	0	1.06	-1.0584	2.68	-2.8059	0	0	6	1	1	0	0	0	0	0	0	0	0	0	0	0	0	0	0	0	0	0	0	0	0	0	0	0	0	0	0	17	0	Tb11.v5.0533;Tb11.v5.0594;Tb927.2.400;Tb927.2.380;Tb927.2.280;Tb927.1.190	Tb11.v5.0533_retrotransposon hot spot (RHS) protein, putative | location=Tb927_11_bin_v5.1:2299801-2300772(-) | length=323 | sequence_SO=random_sequence | SO=protein_coding;Tb11.v5.0594 | organism=Trypanosoma
Tb927.9.13280	DRBD9	RNA.binding	0	0	1.34	-1.5332	2.66	-3.495	0	0	1	2	0	2	1	0	0	0	0	0	0	0	138760	52946	0	0	0	0	0	0	0	3052600	0	0	0	0	0	0	0	22	191700	Tb927.9.13280	Tb927.9.13280_RNA-binding protein, putative (DRBD10) | location=Tb927_09_v5.1:2093581-2094870(-) | length=429 | sequence_SO=chromosome | SO=protein_coding
Tb927.8.1510	ATP-dependent DEAD/H RNA helicase, putative Dbp3, ribosome biogenesis? Cis-spliced	rRNA.tRNA.process	0	0	0.452	-0.7533	2.65	-3.4397	0	1	1	2	1	1	1	0	0	0	0	0	0	46497	61433	32650	0	0	0	0	0	0	0	2088700	0	0	0	0	0	0	0	34	140580	Tb927.8.1510	Tb927.8.1510_ATP-dependent DEAD/H RNA helicase, putative | location=Tb927_08_v5.1:490106-493862(+) | length=569 | sequence_SO=chromosome | SO=protein_coding
Tb927.2.5910	40S ribosomal protein S13	Ribosome	0	0	0.922	-2.3861	2.64	-2.5068	0	0	2	2	0	0	0	0	0	0	0	0	2	0	0	0	0	0	0	0	0	2949400	0	0	0	0	0	0	0	0	26545000	9	2949400	Tb927.2.5910;Tb927.10.15120	Tb927.2.5910_40S ribosomal protein S13, putative | location=Tb927_02_v5.1:1077046-1077501(+) | length=151 | sequence_SO=chromosome | SO=protein_coding;Tb927.10.15120 | organism=Trypanosoma_brucei_TREU927 | pr
Tb927.3.1780	LSm8	RNA.processing	0	0	1.97	-2.137	2.64	-3.723	0	0	1	1	1	0	0	0	0	0	1	1	0	188340	0	0	0	0	0	173440	181250	0	0	0	0	0	0	0	0	1631300	0	9	543030	Tb927.3.1780	Tb927.3.1780_U6 snRNA-associated Sm-like protein LSm8p (TbLSm8) | location=Tb927_03_v5.1:461872-462261(-) | length=129 | sequence_SO=chromosome | SO=protein_coding
Tb927.9.7230	ADP-ribosylation factor-like protein, putative (ARL1B)	Vesicular.transport	0	0	0.208	-0.3005	2.63	-3.211	1	0	1	1	0	1	1	0	0	1	0	0	0	0	0	0	0	0	0	0	0	0	0	0	0	0	0	0	0	0	0	9	0	Tb927.9.7230	Tb927.9.7230_ADP-ribosylation factor-like protein, putative (ARL1B) | location=Tb927_09_v5.1:1174742-1175323(+) | length=193 | sequence_SO=chromosome | SO=protein_coding
Tb927.9.7650	ADP-ribosylation factor, putative	Vesicular.transport	0	0	0.69	-1.0679	2.62	-3.5001	0	0	1	1	0	0	1	0	0	0	0	0	0	0	0	118140	0	0	0	0	0	0	0	0	1063200	0	0	0	0	0	0	9	118140	Tb927.9.7650	Tb927.9.7650_ADP-ribosylation factor, putative | location=Tb927_09_v5.1:1249539-1250108(-) | length=189 | sequence_SO=chromosome | SO=protein_coding
Tb927.6.4980	40S ribosomal protein S14	Ribosome	0	1	0.522	-0.6327	2.61	3.6847	1	4	3	8	5	4	6	0	1	0	6	4	6	10662000	7033300	12289000	0	181640	0	11981000	7900900	6395600	69323000	53805000	81672000	0	0	0	53191000	51718000	59594000	7	56444000	Tb927.6.4980;Tb11.0390;Tb11.0290	Tb927.6.4980_40S ribosomal protein S14 (RPS14) | location=Tb927_06_v5.1:1370202-1370673(+) | length=144 | sequence_SO=chromosome | SO=protein_coding;Tb11.0390_4
Tb927.11.3970	hypothetical protein, conserved, copurifies with U2AF35, CCCH zinc finger PS50103, resembles PAT1 E=0.033	ZUnknown	0	0	1.66	-2.0724	2.61	-3.6085	0	0	1	1	0	0	0	0	0	0	1	1	0	0	0	0	0	0	0	77516	72817	0	0	0	0	0	0	0	0	1747600	0	24	150330	Tb927.11.3970	Tb927.11.3970_hypothetical protein, conserved | location=Tb927_11_v5.1:1159933-1162122(+) | length=729 | sequence_SO=chromosome | SO=protein_coding
Tb927.11.10990	Methylthioribosephosphate isomerase (was annotated as EIF2B subunit)	Enzyme	0	0	0.957	-1.457	2.6	-3.5061	0	0	1	2	1	1	0	0	0	0	0	0	0	76783	49380	0	0	0	0	0	0	0	1612500	0	0	0	0	0	0	0	0	21	126160	Tb927.11.10990	Tb927.11.10990_translation initiation factor 2 subunit, putative | location=Tb927_11_v5.1:2938978-2940176(+) | length=386 | sequence_SO=chromosome | SO=protein_coding
Tb927.3.5630	3,2-trans-enoyl-CoA isomerase, mitochondrial precursor, putative	Lipids	0	0	0.771	-1.0229	2.6	-3.1335	1	0	1	1	0	0	0	0	0	1	1	1	0	0	0	0	0	0	35324	102040	77971	0	0	0	0	0	0	0	0	1481400	0	19	215340	Tb927.3.5630	Tb927.3.5630_3,2-trans-enoyl-CoA isomerase, mitochondrial precursor, putative | location=Tb927_03_v5.1:1572763-1573698(+) | length=311 | sequence_SO=chromosome | SO=protein_coding
Tb927.9.11100	PKAC1 protein kinase A catalytic subunit isoform 1	Protein.kinase	0	0	0.197	-0.3041	2.6	-2.7014	0	0	2	1	1	0	0	0	0	0	0	0	0	0	0	0	0	0	0	0	0	0	0	0	0	0	0	0	0	0	0	19	0	Tb927.9.11100;Tb927.9.11030	Tb927.9.11100_protein kinase A catalytic subunit isoform 1,protein kinase A catalytic subunit (PKAC1) | location=Tb927_09_v5.1:1749829-1750833(-) | length=334 | sequence_SO=chromosome | SO=protein_coding;Tb92
Tb927.11.900	isocitrate dehydrogenase, putative (IDH)	Mito.citric.acid.cycle	0	0	0.553	-1.0471	2.59	-3.1462	1	1	2	2	1	1	1	0	0	1	0	2	1	75919	45477	63606	0	0	82021	0	76461	154270	0	0	0	0	0	0	0	0	3394000	22	497760	Tb927.11.900;Tb927.8.3690	Tb927.11.900_isocitrate dehydrogenase, putative (IDH) | location=Tb927_11_v5.1:230567-231808(+) | length=413 | sequence_SO=chromosome | SO=protein_coding;Tb927.8.3690 | organism=Trypanosoma_brucei_TREU927 | p
Tb927.10.11870	GRBC5 mitochondrial RNA binding protein (MRB11870)	Mito.RNA	1	1	5.4	4.6429	2.59	1.9164	0	6	1	9	6	6	7	0	0	0	0	0	0	1263700	1573100	2771500	0	0	0	0	0	0	29784000	25868000	34079000	0	0	0	0	0	0	16	5608200	Tb927.10.11870	Tb927.10.11870_mitochondrial RNA binding protein (MRB11870) | location=Tb927_10_v5.1:2898295-2899227(+) | length=310 | sequence_SO=chromosome | SO=protein_coding
Tb927.1.3180	40S ribosomal protein S11	Ribosome	0	0	1.1	-3.6819	2.59	-3.1062	0	0	1	8	1	0	0	0	0	0	0	0	8	362160	0	0	0	0	0	0	0	14117000	0	0	0	0	0	0	0	0	127050000	9	14479000	Tb927.1.3180	Tb927.1.3180_40S ribosomal protein S11, putative | location=Tb927_01_v5.1:688963-689487(+) | length=174 | sequence_SO=chromosome | SO=protein_coding
Tb927.9.1780	sec1 family transport protein, putative (SLY1)	Vesicular.transport	0	0	0.747	-0.9149	2.58	-3.5224	0	0	1	2	0	0	0	0	0	0	1	1	0	0	0	0	0	0	0	40522	64335	0	0	0	0	0	0	0	1256200	0	0	31	104860	Tb927.9.1780	Tb927.9.1780_sec1 family transport protein, putative (SLY1) | location=Tb927_09_v5.1:422317-424200(-) | length=627 | sequence_SO=chromosome | SO=protein_coding
Tb11.v5.0199	universal minicircle sequence binding protein, putative	Mito.DNA	1	1	4.48	4.4211	2.57	2.0404	0	5	3	7	6	5	6	0	0	0	0	0	0	3597800	1018700	1568900	0	0	0	0	0	0	40535000	18124000	24590000	0	0	0	0	0	0	15	6185400	Tb11.v5.0199;Tb927.10.6060;Tb927.10.6070	Tb11.v5.0199_universal minicircle sequence binding protein, putative | location=Tb927_11_bin_v5.1:298828-299469(-) | length=213 | sequence_SO=random_sequence | SO=protein_coding;Tb927.10.6060 | organism=Trypa
Tb927.3.4640	POMP26	Mito.membrane	0	0	0.405	-0.6753	2.57	-3.6699	1	0	1	1	0	0	0	0	1	0	0	0	0	0	0	0	0	301960	0	0	0	0	0	0	0	0	1787000	0	0	0	0	10	301960	Tb927.3.4640	Tb927.3.4640_hypothetical protein, conserved | location=Tb927_03_v5.1:1314328-1315164(-) | length=278 | sequence_SO=chromosome | SO=protein_coding
Tb927.9.8820	hypothetical protein, conserved, no yeast or human match	ZUnknown	0	0	1.56	-1.9517	2.57	-3.6566	0	0	1	2	0	0	0	0	0	0	0	2	0	0	0	0	0	0	0	0	63177	0	0	0	0	0	0	0	0	3095700	0	49	63177	Tb927.9.8820	Tb927.9.8820_hypothetical protein, conserved | location=Tb927_09_v5.1:1420934-1424095(-) | length=1053 | sequence_SO=chromosome | SO=protein_coding
Tb927.5.3800	glutamine hydrolysing (not ammonia-dependent) carbomoyl phosphate synthase, putative	Amino.acids	0	0	0.653	-0.9313	2.56	-2.9069	0	0	1	3	1	0	0	0	0	0	0	0	2	0	0	0	0	0	0	0	0	40056	0	0	0	0	0	0	0	0	3565000	89	40056	Tb927.5.3800	Tb927.5.3800_glutamine hydrolysing (not ammonia-dependent) carbomoyl phosphate synthase, putative | location=Tb927_05_v5.1:1238877-1244378(+) | length=1833 | sequence_SO=chromosome | SO=protein_coding
Tb927.5.1610	60S ribosomal protein L13a	Ribosome	0	0	0.942	-2.5716	2.56	-2.3353	0	1	2	5	1	1	1	0	0	0	0	1	5	355530	235870	188200	0	0	0	0	114910	7342500	0	0	0	0	0	0	0	0	58740000	8	8237000	Tb927.5.1610;Tb927.4.3550	Tb927.5.1610_60S ribosomal protein L13a, putative | location=Tb927_05_v5.1:567655-568841(+) | length=222 | sequence_SO=chromosome | SO=protein_coding;Tb927.4.3550 | organism=Trypanosoma_brucei_TREU927 | produ
Tb927.5.2140	UPF1	RNA.degradation	0	1	0.304	0.4314	2.56	3.1816	0	7	1	22	16	17	7	0	0	0	10	9	4	1932300	1509100	579690	0	0	0	644220	506750	222650	78607000	60593000	36796000	0	0	0	37443000	29275000	16229000	48	5394700	Tb927.5.2140	Tb927.5.2140_regulator of nonsense transcripts UPF1 | location=Tb927_05_v5.1:732744-735318(-) | length=842 | sequence_SO=chromosome | SO=protein_coding
Tb927.11.4610	protein kinase A regulatory subunit (PKA-R)	Protein.kinase	0	0	0.153	-0.3087	2.55	-2.953	1	0	2	3	2	0	1	0	0	1	0	1	2	180570	0	69759	0	0	24241	0	0	107880	0	0	0	0	0	0	0	0	3452100	32	382450	Tb927.11.4610;Tb11.v5.0587	Tb927.11.4610_protein kinase A regulatory subunit (PKA-R) | location=Tb927_11_v5.1:1327122-1328621(+) | length=499 | sequence_SO=chromosome | SO=protein_coding;Tb11.v5.0587 | organism=Trypanosoma_brucei_TREU9
Tb927.11.10510	ubiquinone biosynthesis methyltransferase, putative	Mito.pathway	0	0	2.08	-2.8707	2.54	-2.8859	1	0	1	2	0	0	0	0	0	1	2	1	1	0	0	0	0	0	109640	478530	207740	348210	0	0	0	0	0	0	7656600	0	0	16	1144100	Tb927.11.10510	Tb927.11.10510_ubiquinone biosynthesis methyltransferase, putative | location=Tb927_11_v5.1:2797106-2797972(+) | length=288 | sequence_SO=chromosome | SO=protein_coding
Tb927.11.4360	Protein of unknown function (DUF1014), putative	ZUnknown	0	0	0.0186	-0.0433	2.53	-2.4017	0	1	1	1	1	1	1	0	0	0	0	0	0	274380	273720	158500	0	0	0	0	0	0	0	0	1585000	0	0	0	0	0	0	10	706610	Tb927.11.4360	Tb927.11.4360_hypothetical protein, conserved | location=Tb927_11_v5.1:1264935-1265708(-) | length=257 | sequence_SO=chromosome | SO=protein_coding
Tb927.8.3970	oxidoreductase, putative	Enzyme	0	0	1.66	-1.9803	2.52	-3.1377	0	0	1	1	0	0	0	0	0	0	1	1	1	0	0	0	0	0	0	268760	106920	113990	0	0	0	0	0	0	0	0	2051800	18	489670	Tb927.8.3970	Tb927.8.3970_oxidoreductase, putative | location=Tb927_08_v5.1:1185508-1186884(-) | length=433 | sequence_SO=chromosome | SO=protein_coding
Tb927.11.9720	40S ribosomal protein S27	Ribosome	0	1	0.407	-0.6695	2.52	2.7407	1	4	1	5	4	4	5	0	0	1	4	3	3	4830600	5584600	8361100	0	0	252270	5959000	2985500	7083600	27130000	30001000	33535000	0	0	0	30199000	17656000	35500000	5	35057000	Tb927.11.9720	Tb927.11.9720_40S ribosomal protein S27, putative | location=Tb927_11_v5.1:2634082-2634342(-) | length=86 | sequence_SO=chromosome | SO=protein_coding
Tb927.8.4540	PBP1	RNA.degradation	0	0	1.62	-2.9462	2.52	-2.7079	0	0	1	4	0	0	0	0	0	0	4	1	0	0	0	0	0	0	0	1187000	290070	0	0	0	0	0	0	0	17805000	0	0	15	1477100	Tb927.8.4540	Tb927.8.4540_PAB1-binding protein , putative | location=Tb927_08_v5.1:1342648-1344300(-) | length=550 | sequence_SO=chromosome | SO=protein_coding
Tb927.2.4210	glycosomal phosphoenolpyruvate carboxykinase (PEPCK)	Glucose.glycerol	0	0	0.469	-0.7323	2.51	-3.1925	0	0	1	2	1	0	1	0	0	0	0	0	0	60289	0	46985	0	0	0	0	0	0	0	0	1503500	0	0	0	0	0	0	32	107270	Tb927.2.4210	Tb927.2.4210_glycosomal phosphoenolpyruvate carboxykinase (PEPCK) | location=Tb927_02_v5.1:740813-742390(-) | length=525 | sequence_SO=chromosome | SO=protein_coding
Tb927.11.6200	60S ribosomal protein L28	Ribosome	0	0	1.43	-2.5252	2.51	-2.8743	0	0	2	4	0	0	0	0	0	0	0	0	4	0	0	0	0	0	0	0	0	1190900	0	0	0	0	0	0	0	0	7145600	6	1190900	Tb927.11.6200;Tb927.11.6180	Tb927.11.6200_60S ribosomal protein L28, putative | location=Tb927_11_v5.1:1743969-1744409(-) | length=146 | sequence_SO=chromosome | SO=protein_coding;Tb927.11.6180 | organism=Trypanosoma_brucei_TREU927 | pr
Tb927.8.890	Ras-related protein Rab1A	Vesicular.transport	0	0	1.27	-0.9219	2.5	-2.0776	9	5	3	10	6	5	5	1	3	9	6	6	8	2873800	1239800	2279300	141540	875630	4146200	1748800	1695600	4225700	39776000	24131000	39614000	0	20657000	42591000	24253000	24506000	40267000	14	19226000	Tb927.8.890;Tb927.11.13750;Tb927.8.4610	Tb927.8.890_small GTP-binding protein Rab1, putative | location=Tb927_08_v5.1:265034-266020(-) | length=208 | sequence_SO=chromosome | SO=protein_coding
Tb927.10.8540	chaperone DNAj, putative, J6	Chaperone	0	0	0.521	-1.1974	2.47	-3.3404	0	0	1	1	0	0	0	0	0	0	1	0	0	0	0	0	0	0	0	261040	0	0	0	0	0	0	0	0	3132500	0	0	12	261040	Tb927.10.8540	Tb927.10.8540_chaperone protein DNAj, putative | location=Tb927_10_v5.1:2118253-2119263(+) | length=336 | sequence_SO=chromosome | SO=protein_coding
Tb927.9.9450	ZC3H28	RNA.binding	0	0	9.27	-11.3374	2.46	-3.1424	0	0	1	47	0	0	0	0	0	0	44	43	33	0	0	0	0	0	0	56017000	43028000	36097000	0	0	0	0	0	0	2767500000	1789500000	842750000	40	135140000	Tb927.9.9450	Tb927.9.9450_zinc finger protein family member, putative (ZC3H28) | location=Tb927_09_v5.1:1510030-1513122(-) | length=1030 | sequence_SO=chromosome | SO=protein_coding
Tb927.9.4660	hypothetical protein, conserved	ZUnknown	0	0	0.822	-1.0188	2.46	-3.019	1	0	1	1	0	0	0	0	1	0	0	0	0	0	0	0	0	30406	0	0	0	0	0	0	0	0	760140	0	0	0	0	25	30406	Tb927.9.4660	Tb927.9.4660_hypothetical protein, conserved | location=Tb927_09_v5.1:862635-864122(+) | length=495 | sequence_SO=chromosome | SO=protein_coding
Tb927.10.8850	A distinct subfamily of CDD/CDA-like deaminases, putative	ZUnknown	0	0	2.7	-3.4993	2.46	-2.9767	0	0	1	5	0	0	0	0	0	0	4	1	4	0	0	0	0	0	0	321680	54882	296830	0	0	0	0	0	0	8834200	0	10958000	32	673390	Tb927.10.8850	Tb927.10.8850_hypothetical protein, conserved | location=Tb927_10_v5.1:2190397-2192154(+) | length=585 | sequence_SO=chromosome | SO=protein_coding
Tb927.7.710	heat shock 70 kDa protein, putative (HSP70.4)	Chaperone	0	0	0.222	-0.3103	2.45	-2.4195	4	3	1	9	6	3	4	0	4	4	2	4	2	655090	198910	308540	0	224640	376440	172180	202930	137280	16227000	7903600	9120000	0	6083900	11749000	8263000	6002200	7483300	32	2276000	Tb927.7.710	Tb927.7.710_heat shock 70 kDa protein, putative (HSP70) | location=Tb927_07_v5.1:155358-157286(-) | length=639 | sequence_SO=chromosome | SO=protein_coding
Tb927.10.5340	40S ribosomal protein S18	Ribosome	0	0	1.05	-3.4996	2.45	-3.0249	0	0	4	8	0	0	0	0	0	0	0	0	8	0	0	0	0	0	0	0	0	12406000	0	0	0	0	0	0	0	0	106040000	9	12406000	Tb927.10.5340;Tb927.10.5330;Tb11.v5.1060;Tb11.v5.0243	Tb927.10.5340_40S ribosomal protein S18, putative (RPS18) | location=Tb927_10_v5.1:1333758-1334219(+) | length=153 | sequence_SO=chromosome | SO=protein_coding;Tb927.10.5330 | organism=Trypanosoma_brucei_TREU
Tb927.10.5020	eIF4E5	Translation	0	0	0.365	-0.714	2.45	-3.1206	0	1	1	1	1	1	1	0	0	0	0	1	0	147150	132750	152890	0	0	0	0	145410	0	0	0	0	0	0	0	0	1890300	0	13	578200	Tb927.10.5020	Tb927.10.5020_hypothetical protein, conserved | location=Tb927_10_v5.1:1245422-1246009(+) | length=195 | sequence_SO=chromosome | SO=protein_coding
Tb927.10.3710	proteasome activator protein PA26	Ubiquitin.proteasome	0	0	0.36	-0.5798	2.45	-2.7858	0	0	2	2	1	0	1	0	0	0	0	0	1	156070	0	107740	0	0	0	0	0	117250	0	0	1616000	0	0	0	0	0	0	15	381050	Tb927.10.3710;Tb11.v5.0761	Tb927.10.3710_proteasome activator protein PA26 | location=Tb927_10_v5.1:966040-966735(-) | length=231 | sequence_SO=chromosome | SO=protein_coding;Tb11.v5.0761 | organism=Trypanosoma_brucei_TREU927 | product
Tb927.10.13790	hypothetical protein, conserved, no human or yeast homologue	ZUnknown	0	0	0.87	-1.5442	2.45	-4.088	0	0	1	1	1	0	0	0	0	0	0	0	0	28184	0	0	0	0	0	0	0	0	1099200	0	0	0	0	0	0	0	0	39	28184	Tb927.10.13790	Tb927.10.13790_hypothetical protein, conserved | location=Tb927_10_v5.1:3366096-3368138(-) | length=680 | sequence_SO=chromosome | SO=protein_coding
Tb927.11.3550	NPA3/XAB1 homologue, interacts with XPA and with RNA pol II, required for pol II import into the nucleus.	Nuclear.transport	0	0	4.78	-6.1636	2.44	-3.7184	2	0	1	4	0	0	1	0	0	2	3	3	4	0	0	356480	0	0	499340	2780900	2477800	3450600	0	0	0	0	0	5480500	29542000	26012000	31052000	10	9565200	Tb927.11.3550	Tb927.11.3550_XPA-interacting protein, putative | location=Tb927_11_v5.1:1046904-1047776(+) | length=290 | sequence_SO=chromosome | SO=protein_coding
Tb927.10.730	ATP synthase, putative	Mito.e.transport	0	0	0.0885	-0.2464	2.43	-3.7654	3	0	2	3	3	1	0	1	2	3	0	2	0	509250	403170	0	54753	150800	1006000	0	187220	0	10430000	0	0	0	0	19991000	0	8735200	0	23	2311200	Tb927.10.730;Tb11.v5.0822	Tb927.10.730_ATP synthase, putative | location=Tb927_10_v5.1:187414-188820(+) | length=468 | sequence_SO=chromosome | SO=protein_coding;Tb11.v5.0822_ATP synthas
Tb927.10.14550	DED1-1, ATP-dependent DEAD/H RNA helicase, VASA homologue; strongest yeast match is to DBP1	Translation	0	0	0.904	-0.9956	2.42	-3.0027	0	0	1	2	0	1	1	0	0	0	1	0	0	0	0	11697	0	0	0	25961	0	0	0	0	479590	0	0	0	0	0	0	41	37658	Tb927.10.14550	Tb927.10.14550_ATP-dependent DEAD/H RNA helicase, putative | location=Tb927_10_v5.1:3565941-3567923(-) | length=660 | sequence_SO=chromosome | SO=protein_coding
Tb927.11.3570	aminopeptidase, putative,metallo-peptidase, Clan MA(E) Family M1	Protease	0	0	0.883	-2.1011	2.4	-3.1481	2	1	1	5	2	1	3	0	0	2	0	1	2	64211	15401	65614	0	0	39248	0	6873.8	2778200	4195500	0	3074700	0	0	0	0	0	0	56	2969600	Tb927.11.3570	Tb927.11.3570_aminopeptidase, putative,metallo-peptidase, Clan MA(E) Family M1 | location=Tb927_11_v5.1:1057399-1060014(+) | length=871 | sequence_SO=chromosome | SO=protein_coding
Tb927.10.5640	TbGemin2	RNA.processing	0	0	0.0346	-0.0717	2.4	-3.0777	0	1	1	1	1	1	1	0	0	0	0	1	0	61612	71878	25603	0	0	0	0	38579	0	0	0	0	0	0	0	0	848730	0	22	197670	Tb927.10.5640	Tb927.10.5640_hypothetical protein, conserved | location=Tb927_10_v5.1:1407195-1408682(+) | length=495 | sequence_SO=chromosome | SO=protein_coding
Tb927.10.1610	hypothetical protein, conserved	ZUnknown	0	0	1.01	-1.949	2.4	-3.0465	0	0	1	1	0	0	0	0	0	0	0	0	1	0	0	0	0	0	0	0	0	578910	0	0	0	0	0	0	0	0	2894600	5	578910	Tb927.10.1610	Tb927.10.1610_hypothetical protein, conserved | location=Tb927_10_v5.1:438154-438597(-) | length=147 | sequence_SO=chromosome | SO=protein_coding
Tb927.7.5200	hypothetical protein, conserved	ZUnknown	0	0	0.467	-0.5995	2.4	-2.6991	0	0	1	1	0	0	1	0	0	0	0	0	0	0	0	0	0	0	0	0	0	0	0	0	0	0	0	0	0	0	0	35	0	Tb927.7.5200	Tb927.7.5200_hypothetical protein, conserved | location=Tb927_07_v5.1:1369681-1371855(+) | length=724 | sequence_SO=chromosome | SO=protein_coding
Tb927.6.720	60S ribosomal protein L14	Ribosome	0	0	0.57	-2.1159	2.39	-2.6841	0	0	2	7	0	0	1	0	0	0	0	0	7	0	0	285400	0	0	0	0	0	8949200	0	0	0	0	0	0	0	0	62645000	7	9234600	Tb927.6.720;Tb927.11.11230	Tb927.6.720_40S ribosomal protein L14, putative | location=Tb927_06_v5.1:298156-298725(-) | length=189 | sequence_SO=chromosome | SO=protein_coding;Tb927.11.11230 | organism=Trypanosoma_brucei_TREU927 | produ
Tb927.6.2140	hypothetical protein, conserved	Mito.RNA	1	1	3.95	4.2714	2.38	2.375	0	4	1	7	5	4	5	0	0	0	0	1	0	2002800	2225200	2183800	0	0	0	0	152860	0	28091000	28380000	33294000	0	0	0	0	0	0	14	6564600	Tb927.6.2140	Tb927.6.2140_hypothetical protein, conserved | location=Tb927_06_v5.1:682282-683085(-) | length=267 | sequence_SO=chromosome | SO=protein_coding
Tb927.3.3560	U-box domain containing protein, putative	ZUnknown	0	0	0.393	-0.5956	2.38	-2.9441	1	1	1	3	2	1	1	0	0	1	0	0	0	159500	27351	40656	0	0	54243	0	0	0	5423100	0	0	0	0	0	0	0	0	34	281750	Tb927.3.3560	Tb927.3.3560_hypothetical protein, conserved | location=Tb927_03_v5.1:1001768-1003642(+) | length=624 | sequence_SO=chromosome | SO=protein_coding
Tb927.11.7170	seryl-tRNA synthetase, putative	Translation.tRNA	0	0	0.625	-0.9952	2.37	-3.3509	1	1	1	2	2	1	1	0	0	1	0	1	1	171880	59798	81224	0	0	53967	0	28274	75772	5672000	0	0	0	0	0	0	0	0	33	470910	Tb927.11.7170	Tb927.11.7170_seryl-tRNA synthetase | location=Tb927_11_v5.1:2005982-2007421(-) | length=479 | sequence_SO=chromosome | SO=protein_coding
Tb927.5.3020	hypothetical protein, conserved	ZUnknown	0	0	0.665	-1.1317	2.37	-2.2499	0	1	1	2	1	1	1	0	0	0	0	2	0	353490	220180	194560	0	0	0	0	432310	0	0	0	0	0	0	0	0	6917000	0	16	1200500	Tb927.5.3020	Tb927.5.3020_hypothetical protein, conserved | location=Tb927_05_v5.1:1003563-1004825(+) | length=420 | sequence_SO=chromosome | SO=protein_coding
Tb927.4.1860	40S ribosomal protein S19	Ribosome	0	0	1.69	-4.2914	2.36	-3.8382	0	0	1	6	0	0	0	0	0	0	0	0	6	0	0	0	0	0	0	0	0	10978000	0	0	0	0	0	0	0	0	60236000	6	10978000	Tb927.4.1860	Tb927.4.1860_ribosomal protein S19, putative | location=Tb927_04_v5.1:464771-465274(-) | length=167 | sequence_SO=chromosome | SO=protein_coding
Tb927.8.3150	Tric complex gamma subunit (TCP-1-gamma)	Chaperone	0	0	1.34	-1.7134	2.35	-3.1065	3	2	1	7	3	2	3	0	0	3	3	2	3	332660	82975	169490	0	0	159090	205850	107580	189930	8890300	6096700	0	0	0	7007700	6029200	0	5944000	35	1247600	Tb927.8.3150	Tb927.8.3150_T-complex protein 1, gamma subunit, putative (TCP-1-gamma) | location=Tb927_08_v5.1:937585-939276(+) | length=556 | sequence_SO=chromosome | SO=protein_coding
Tb927.9.7110	GRAM domain containing protein, putative	ZUnknown	0	0	0.81	-1.4278	2.35	-2.8481	0	0	1	3	1	0	1	0	0	0	0	0	2	115160	0	138090	0	0	0	0	0	270390	0	0	0	0	0	0	0	0	5137400	19	523640	Tb927.9.7110	Tb927.9.7110_unspecified product | location=Tb927_09_v5.1:1154238-1155125(+) | length=295 | sequence_SO=chromosome | SO=protein_coding
Tb927.10.10400	Mitochondrial ribosomal protein S11	Mito.translation	0	0	0.577	-0.8906	2.34	-3.0349	0	0	1	1	0	0	0	0	0	0	1	0	0	0	0	0	0	0	0	0	0	0	0	0	0	0	0	0	0	0	0	16	0	Tb927.10.10400	Tb927.10.10400_hypothetical protein, conserved | location=Tb927_10_v5.1:2564023-2565003(-) | length=326 | sequence_SO=chromosome | SO=protein_coding
Tb927.11.7890	ZC3H44	RNA.binding	0	0	1.65	-2.2843	2.34	-3.0088	0	0	1	3	0	0	0	0	0	0	3	1	1	0	0	0	0	0	0	308320	103430	95947	0	0	0	0	0	0	6166300	0	0	20	507690	Tb927.11.7890	Tb927.11.7890_zinc finger protein family member, putative (ZC3H44) | location=Tb927_11_v5.1:2233413-2234702(-) | length=429 | sequence_SO=chromosome | SO=protein_coding
Tb927.2.2440	proteasome regulatory non-ATPase subunit 6 (RPN6)	Ubiquitin.proteasome	0	0	0.342	-0.7266	2.34	-3.1589	2	0	1	2	1	0	1	0	0	2	0	0	1	94834	0	73438	0	0	117000	0	0	69955	0	0	0	0	0	2925000	0	0	0	25	355230	Tb927.2.2440	Tb927.2.2440_proteasome regulatory non-ATPase subunit 6 (RPN6) | location=Tb927_02_v5.1:480837-482378(-) | length=513 | sequence_SO=chromosome | SO=protein_coding
Tb927.9.9860	GRP170, HSP70 and actin-like ATPase domains	Chaperone	0	0	0.338	-0.5551	2.31	-2.7231	0	0	1	1	0	0	1	0	0	0	0	0	0	0	0	54250	0	0	0	0	0	0	0	0	2224200	0	0	0	0	0	0	41	54250	Tb927.9.9860	Tb927.9.9860_hypothetical protein, conserved | location=Tb927_09_v5.1:1561649-1563811(-) | length=720 | sequence_SO=chromosome | SO=protein_coding
Tb927.1.3070	hypothetical protein, conserved, poly(Q), poly(H)	ZUnknown	0	0	2	-1.7448	2.31	-3.2398	0	0	1	2	0	1	0	0	0	0	2	1	0	0	83713	0	0	0	0	124050	76999	0	0	0	0	0	0	0	2729200	0	0	22	284770	Tb927.1.3070	Tb927.1.3070_hypothetical protein, conserved | location=Tb927_01_v5.1:675213-676454(+) | length=413 | sequence_SO=chromosome | SO=protein_coding
Tb927.7.5020	60S ribosomal protein L19	Ribosome	0	0	1.5	-2.8322	2.3	-2.7156	0	0	4	4	0	0	0	0	0	0	0	0	4	0	0	0	0	0	0	0	0	1946300	0	0	0	0	0	0	0	0	15571000	8	1946300	Tb927.7.5020;Tb927.7.5000;Tb11.v5.0182;Tb11.v5.0181	Tb927.7.5020_60S ribosomal protein L19, putative | location=Tb927_07_v5.1:1325590-1326372(+) | length=260 | sequence_SO=chromosome | SO=protein_coding;Tb927.7.5000 | organism=Trypanosoma_brucei_TREU927 | prod
Tb927.11.7140	CSBPII_33	RNA.binding	0	0	1.42	-1.7996	2.3	-3.506	0	0	1	2	0	0	0	0	0	0	1	0	1	0	0	0	0	0	0	79489	0	121390	0	0	0	0	0	0	0	0	2306300	19	200870	Tb927.11.7140	Tb927.11.7140_cell cycle sequence binding phosphoprotein (RBP45), putative | location=Tb927_11_v5.1:2000802-2001743(-) | length=313 | sequence_SO=chromosome | SO=protein_coding
Tb927.6.2490	SDH7 succinate dehydrogenase (complex II) subunit	Mito.e.transport	0	0	4.63	-4.8643	2.29	-3.2118	1	0	1	4	0	0	1	0	0	1	3	4	4	0	0	0	0	0	91173	424210	677740	748230	0	0	0	0	0	0	6099000	8913300	10890000	14	1941400	Tb927.6.2490	Tb927.6.2490_hypothetical protein, conserved | location=Tb927_06_v5.1:759002-759724(+) | length=240 | sequence_SO=chromosome | SO=protein_coding
Tb927.11.3380	RanBP1 Ran-binding protein 1	Nuclear.transport	1	1	6	4.7756	2.29	2.5218	0	4	1	4	4	4	4	0	0	0	0	0	0	2503800	2032700	2303100	0	0	0	0	0	0	28164000	19862000	27209000	0	0	0	0	0	0	11	6839600	Tb927.11.3380	Tb927.11.3380_Ran-binding protein 1, putative | location=Tb927_11_v5.1:991911-992384(+) | length=157 | sequence_SO=chromosome | SO=protein_coding
Tb11.v5.0468	alpha tubulin, putative	Cytoskeleton	0	0	1.51	-2.5226	2.28	-3.5406	1	0	1	22	0	0	0	0	1	0	1	0	2	0	0	0	0	97161	0	0	0	803250	0	0	0	0	0	0	0	0	12049000	15	900410	Tb11.v5.0468	Tb11.v5.0468_alpha tubulin, putative | location=Tb927_11_bin_v5.1:1902781-1903530(+) | length=249 | sequence_SO=random_sequence | SO=protein_coding
Tb927.3.3320	60S ribosomal protein L13	Ribosome	0	0	0.976	-3.0416	2.28	-3.2959	0	0	2	7	0	0	0	0	0	0	0	0	7	0	0	0	0	0	0	0	0	5520900	0	0	0	0	0	0	0	0	55209000	10	5520900	Tb927.3.3320;Tb927.3.3310	Tb927.3.3320_60S ribosomal protein L13, putative | location=Tb927_03_v5.1:851696-852352(-) | length=218 | sequence_SO=chromosome | SO=protein_coding;Tb927.3.3310 | organism=Trypanosoma_brucei_TREU927 | produc
Tb927.9.14370	60S ribosomal protein L26	Ribosome	0	0	0.0724	-0.157	2.27	-3.1262	0	0	2	2	0	0	0	0	0	0	0	0	2	0	0	0	0	0	0	0	0	0	0	0	0	0	0	0	0	0	0	4	0	Tb927.9.14370;Tb927.8.6180	Tb927.9.14370_60S ribosomal protein L26, putative | location=Tb927_09_v5.1:2248337-2248768(-) | length=143 | sequence_SO=chromosome | SO=protein_coding;Tb927.8.6180 | organism=Trypanosoma_brucei_TREU927 | pro
Tb927.8.2570	hypothetical protein, conserved	ZUnknown	0	0	0.66	-1.188	2.26	-3.5038	1	0	1	2	1	0	0	1	0	0	0	0	0	0	0	0	60929	0	0	0	0	0	0	0	0	1157600	0	0	0	0	0	19	60929	Tb927.8.2570	Tb927.8.2570_hypothetical protein, conserved | location=Tb927_08_v5.1:756526-757827(+) | length=433 | sequence_SO=chromosome | SO=protein_coding
Tb927.11.15420	eIF3K	Translation	0	0	0.791	-1.131	2.25	-3.0651	0	0	1	1	0	1	1	0	0	0	0	1	0	0	125770	211910	0	0	0	0	164480	0	0	0	0	0	0	0	0	2302800	0	14	502160	Tb927.11.15420	Tb927.11.15420_hypothetical protein, conserved | location=Tb927_11_v5.1:4095426-4096043(-) | length=205 | sequence_SO=chromosome | SO=protein_coding
Tb927.9.5890	solanesyl-diphosphate synthase, putative (28G16.440)	Mito.pathway	0	0	1.15	-1.505	2.24	-3.0566	0	0	1	1	0	0	0	0	0	0	0	1	0	0	0	0	0	0	0	0	102690	0	0	0	0	0	0	0	0	1745700	0	17	102690	Tb927.9.5890	Tb927.9.5890_solanesyl-diphosphate synthase, putative | location=Tb927_09_v5.1:993572-994651(+) | length=359 | sequence_SO=chromosome | SO=protein_coding
Tb927.2.100	retrotransposon hot spot protein 1 (RHS1), putative	RHS	0	0	0.241	-0.4319	2.24	-3.0722	0	1	1	4	1	2	1	0	0	0	1	0	1	0	85679	35009	0	0	0	43268	0	16487	0	4541000	0	0	0	0	0	0	0	53	180440	Tb927.2.100	Tb927.2.100_retrotransposon hot spot protein 1 (RHS1), putative | location=Tb927_02_v5.1:1683-4172(-) | length=829 | sequence_SO=chromosome | SO=protein_coding
Tb927.10.8440	glucose transporter 1B (THT1-)	Glucose.glycerol	0	0	1.67	-3.2029	2.23	-2.5261	0	0	16	2	1	0	0	0	0	0	2	0	2	158580	0	0	0	0	0	977200	0	603240	0	0	0	0	0	0	12713000	0	7833100	13	1739000	Tb927.10.8440;Tb11.v5.0330;Tb11.v5.0333;Tb927.10.8480;Tb927.10.8470;Tb927.10.8460;Tb11.v5.0309;Tb11.v5.0308;Tb11.v5.0307;Tb927.10.8530;Tb927.10.8520;Tb927.10.8510;Tb927.10.8500;Tb927.10.8490;Tb11.v5.0332;Tb11.v5.0331	Tb927.10.8440_glucose transporter 1B (THT1-) | location=Tb927_10_v5.1:2093459-2095042(+) | length=527 | sequence_SO=chromosome | SO=protein_coding;Tb11.v5.0330_
Tb927.2.830	retrotransposon hot spot protein (RHS1, pseudogene), putative	RHS	0	0	0.0274	-0.0693	2.23	-2.9919	0	0	3	3	0	1	0	0	0	0	0	0	0	0	90115	0	0	0	0	0	0	0	0	1802300	0	0	0	0	0	0	0	20	90115	Tb927.2.830;Tb11.v5.0655;Tb11.v5.0624	Tb927.2.830_retrotransposon hot spot protein (RHS, pseudogene), putative,retrotransposon hot spot protein 1 (RHS1), interrupted | location=Tb927_02_v5.1:143717-144772(-) | length=352 | sequence_SO=chromosome
Tb927.8.6160	40S ribosomal protein S8	Ribosome	0	0	0.994	-3.4382	2.23	-3.1304	0	0	2	4	0	0	0	0	0	0	0	0	4	0	0	0	0	0	0	0	0	13668000	0	0	0	0	0	0	0	0	95673000	7	13668000	Tb927.8.6160;Tb927.8.6150	Tb927.8.6160_40S ribosomal protein S8, putative | location=Tb927_08_v5.1:1796603-1797265(+) | length=220 | sequence_SO=chromosome | SO=protein_coding;Tb927.8.6150 | organism=Trypanosoma_brucei_TREU927 | produ
Tb927.10.2540	adenylate kinase, putative (ADKC)	Nucleotides	0	0	0.512	-0.7474	2.21	-2.8881	0	0	1	2	0	0	0	0	0	0	0	1	2	0	0	0	0	0	0	0	48496	131910	0	0	0	0	0	0	0	0	1846800	14	180410	Tb927.10.2540	Tb927.10.2540_adenylate kinase, putative | location=Tb927_10_v5.1:660803-661492(+) | length=229 | sequence_SO=chromosome | SO=protein_coding
Tb927.11.3600	40S ribosomal protein S4	Ribosome	0	0	1.17	-4.0008	2.21	-2.9573	0	0	3	20	0	0	0	0	0	0	0	0	20	0	0	0	0	0	0	0	0	16765000	0	0	0	0	0	0	0	0	295850000	18	16765000	Tb927.11.3600;Tb927.11.3590;Tb11.v5.1059	Tb927.11.3600_40S ribosomal protein S4, putative | location=Tb927_11_v5.1:1063340-1064215(+) | length=273 | sequence_SO=chromosome | SO=protein_coding;Tb927.11.3590 | organism=Trypanosoma_brucei_TREU927 | pro
Tb927.1.2040	ESAG2, putative	ESAG	0	0	1.22	-1.613	2.2	-3.17	1	0	1	1	0	0	1	0	0	1	0	0	0	0	0	0	0	0	0	0	0	0	0	0	0	0	0	0	0	0	0	23	0	Tb927.1.2040	Tb927.1.2040_expression site-associated gene 2 (ESAG2) protein, putative | location=Tb927_01_v5.1:521093-522475(-) | length=460 | sequence_SO=chromosome | SO=protein_coding
Tb927.8.2520	Acetyl-CoA synthetase	Glucose.glycerol	0	0	0.544	-0.8322	2.2	-2.9176	1	1	1	1	1	1	1	1	0	1	1	1	1	182590	137480	165530	78811	0	132890	122060	80393	105700	4896800	3799300	4405400	0	0	3472300	3420900	0	0	27	1005400	Tb927.8.2520	Tb927.8.2520_acetyl-CoA synthetase, putative | location=Tb927_08_v5.1:743395-745416(+) | length=673 | sequence_SO=chromosome | SO=protein_coding
Tb927.10.10850	AGO1	RNA.degradation	0	1	0.151	-0.2403	2.2	2.0469	0	9	1	21	17	13	9	0	0	0	8	11	4	1210000	1065500	582380	0	0	0	567960	789740	254810	60098000	48507000	37490000	0	0	0	39698000	45665000	23355000	57	4470400	Tb927.10.10850	Tb927.10.10850_argonaute-like protein (AGO1) | location=Tb927_10_v5.1:2634956-2637667(-) | length=903 | sequence_SO=chromosome | SO=protein_coding
Tb927.8.1930	ISY1 component of PRP19 splicing complex, putative	RNA.processing	0	0	2.74	-3.2938	2.2	-3.1889	0	1	1	3	1	1	1	0	0	0	2	2	0	133800	103240	0	0	0	0	367690	705450	0	0	0	0	0	0	0	4710300	8167400	0	12	1310200	Tb927.8.1930	Tb927.8.1930_hypothetical protein, conserved | location=Tb927_08_v5.1:621083-621913(-) | length=276 | sequence_SO=chromosome | SO=protein_coding
Tb927.5.2570	EIF3B translation initiation factor	Translation	0	0	0.532	-0.6562	2.2	-2.8759	0	0	1	3	2	1	0	0	0	0	0	1	0	26482	30635	0	0	0	0	0	34189	0	0	0	0	0	0	0	0	1333400	0	39	91306	Tb927.5.2570	Tb927.5.2570_translation initiation factor, putative (EIF3B) | location=Tb927_05_v5.1:882648-884738(+) | length=696 | sequence_SO=chromosome | SO=protein_coding
Tb927.11.760	protein phosphatase 2C, putative	Protein.phosphatase	0	0	0.663	-0.9953	2.19	-3.1494	0	0	1	2	1	0	1	0	0	0	0	0	0	82891	0	54483	0	0	0	0	0	0	2238100	0	0	0	0	0	0	0	0	27	137370	Tb927.11.760	Tb927.11.760_protein phosphatase 2C, putative | location=Tb927_11_v5.1:188662-189924(+) | length=408 | sequence_SO=chromosome | SO=protein_coding
Tb927.11.16010	hypothetical protein, conserved	ZUnknown	0	0	0.546	-1.0481	2.18	-2.9941	0	0	1	2	0	0	0	0	0	0	2	0	0	0	0	0	0	0	0	88855	0	0	0	0	0	0	0	0	3909600	0	0	44	88855	Tb927.11.16010	Tb927.11.16010_hypothetical protein, conserved | location=Tb927_11_v5.1:4238756-4242397(-) | length=1213 | sequence_SO=chromosome | SO=protein_coding
Tb927.4.110	retrotransposon hot spot protein (RHS1, pseudogene), putative	RHS	0	0	0.925	-1.0068	2.17	-3.4575	0	0	2	2	0	0	1	0	0	0	0	0	0	0	0	62510	0	0	0	0	0	0	0	0	1312700	0	0	0	0	0	0	21	62510	Tb927.4.110;Tb09.v4.0013	Tb927.4.110_retrotransposon hot spot protein (RHS, pseudogene), putative,retrotransposon hot spot protein 1 (RHS1), interrupted | location=Tb927_04_v5.1:3639-4715(-) | length=359 | sequence_SO=chromosome | SO
Tb927.9.15360	40S ribosomal protein S6	Ribosome	0	0	0.725	-2.0373	2.17	-2.5127	0	0	1	5	0	0	0	0	0	0	0	0	2	0	0	0	0	0	0	0	0	1731500	0	0	0	0	0	0	0	0	17315000	10	1731500	Tb927.9.15360	Tb927.9.15360_40S ribosomal protein S6, putative | location=Tb927_09_v5.1:2384274-2385098(+) | length=250 | sequence_SO=chromosome | SO=protein_coding
Tb927.9.11740	cyclophilin type peptidyl-prolyl cis-trans isomerase, putative (PPIase)	Chaperone	0	0	1.05	-1.7605	2.16	-2.8279	0	1	1	3	1	2	1	0	0	0	1	1	0	134070	352610	0	0	0	0	231210	273010	0	0	0	0	0	0	0	0	3003100	0	11	990900	Tb927.9.11740	Tb927.9.11740_cyclophilin type peptidyl-prolyl cis-trans isomerase, putative (PPIase) | location=Tb927_09_v5.1:1825121-1825672(+) | length=183 | sequence_SO=chromosome | SO=protein_coding
Tb927.7.6090	eIF3a	Translation	0	2	0.655	-0.866	2.15	-2.7736	0	2	1	7	3	3	2	0	0	0	0	1	1	201960	186840	89514	0	0	0	0	40855	0	0	6913100	0	0	0	0	0	0	0	37	519170	Tb927.7.6090	Tb927.7.6090_hypothetical protein, conserved | location=Tb927_07_v5.1:1659147-1662227(-) | length=762 | sequence_SO=chromosome | SO=protein_coding
Tb927.10.9190	isoleucyl-tRNA synthetase, putative (IleRS)	Translation.tRNA	0	0	0.438	-0.7216	2.15	-2.6393	0	0	1	1	1	0	1	0	0	0	0	0	0	24302	0	18680	0	0	0	0	0	0	0	0	1120800	0	0	0	0	0	0	60	42982	Tb927.10.9190	Tb927.10.9190_isoleucyl-tRNA synthetase, putative (IleRS) | location=Tb927_10_v5.1:2274615-2278046(+) | length=1143 | sequence_SO=chromosome | SO=protein_coding
Tb927.5.1160	Degradation arginine-rich protein for mis-folding, putative	ZUnknown	0	0	2.1	-2.3885	2.15	-3.0545	0	0	1	1	0	0	0	0	0	0	1	1	1	0	0	0	0	0	0	133670	173980	221790	0	0	0	0	0	0	0	0	2439700	11	529440	Tb927.5.1160	Tb927.5.1160_hypothetical protein, conserved | location=Tb927_05_v5.1:452897-453583(+) | length=228 | sequence_SO=chromosome | SO=protein_coding
Tb927.4.1310	ZC3H9	RNA.binding	0	1	0.332	0.3605	2.14	2.5197	0	6	1	10	10	6	10	0	0	0	4	9	2	3014700	1517800	2403600	0	0	0	857210	2250100	314620	59791000	33831000	50197000	0	0	0	31353000	44120000	8585100	22	10358000	Tb927.4.1310	Tb927.4.1310_ZFP family member, putative (ZC3H9) | location=Tb927_04_v5.1:343255-344508(-) | length=416 | sequence_SO=chromosome | SO=protein_coding
Tb927.7.700	hypothetical protein, conserved	ZUnknown	0	0	0.979	0.9155	2.14	-1.8894	0	0	1	1	0	1	0	0	0	0	0	0	0	0	53520	0	0	0	0	0	0	0	0	1766200	0	0	0	0	0	0	0	33	53520	Tb927.7.700	Tb927.7.700_hypothetical protein, conserved | location=Tb927_07_v5.1:151879-153905(-) | length=666 | sequence_SO=chromosome | SO=protein_coding
Tb927.11.6320	MRB1-associated protein	Mito.pathway	0	0	0.0207	-0.0302	2.13	-2.4233	0	0	1	1	0	1	0	0	0	0	0	0	0	0	142210	0	0	0	0	0	0	0	0	2701900	0	0	0	0	0	0	0	19	142210	Tb927.11.6320	Tb927.11.6320_MRB1-associated protein | location=Tb927_11_v5.1:1776732-1778150(-) | length=472 | sequence_SO=chromosome | SO=protein_coding
Tb927.6.4200	LSU ribosomal protein, mitochondrial, putative	Mito.translation	0	0	0.247	-0.5729	2.13	-3.7028	0	0	1	1	1	0	0	0	0	0	0	0	0	84482	0	0	0	0	0	0	0	0	1943100	0	0	0	0	0	0	0	0	23	84482	Tb927.6.4200	Tb927.6.4200_hypothetical protein, conserved | location=Tb927_06_v5.1:1204503-1205837(-) | length=444 | sequence_SO=chromosome | SO=protein_coding
Tb927.9.5320	nucleolar RNA binding protein, putative (28G16.220)	rRNA.tRNA.process	0	1	1.53	0.7719	2.13	2.6441	0	4	1	15	9	13	4	0	0	0	5	7	5	2705400	3456300	1023600	0	0	0	504650	829550	388870	50129000	59809000	26250000	0	0	0	16270000	19801000	14815000	21	8908300	Tb927.9.5320	Tb927.9.5320_nucleolar RNA binding protein, putative | location=Tb927_09_v5.1:929806-931089(+) | length=427 | sequence_SO=chromosome | SO=protein_coding
Tb927.11.6870	14-3-3 protein	Signalling	0	0	0.66	-1.1762	2.13	-3.5324	4	0	1	7	3	0	2	0	0	4	1	1	1	695070	0	266250	0	0	563790	51542	78124	203200	0	0	0	0	0	9020700	0	0	0	16	1858000	Tb927.11.6870	Tb927.11.6870_14-3-3 protein | location=Tb927_11_v5.1:1934227-1934985(-) | length=252 | sequence_SO=chromosome | SO=protein_coding
Tb927.9.11410	60S ribosomal protein L23	Ribosome	0	1	0.541	-0.7832	2.12	2.9539	0	2	2	7	4	2	5	0	0	0	6	4	4	5116600	973200	11359000	0	0	0	8202100	2185500	3296200	47142000	33965000	54621000	0	0	0	48876000	26237000	38218000	8	31132000	Tb927.9.11410;Tb927.9.11380	Tb927.9.11410_unspecified product | location=Tb927_09_v5.1:1789175-1789594(+) | length=139 | sequence_SO=chromosome | SO=protein_coding;Tb927.9.11380_unspecifie
Tb927.8.390	ESAG3 pseudogene	ESAG.pseudo	0	0	1.71	-2.0727	2.11	-2.5066	0	0	1	1	0	0	0	0	0	0	1	0	0	0	0	0	0	0	0	237170	0	0	0	0	0	0	0	0	2371700	0	0	10	237170	Tb927.8.390	Tb927.8.390_expression site-associated gene (ESAG, pseudogene), putative,expression site-associated gene 3 (ESAG3), degenerate | location=Tb927_08_v5.1:105019-106005(+) | length=329 | sequence_SO=chromosome |
Tb927.11.5290	mitochondrial carrier protein, MCP9	Mito.transport	0	0	0.00292	0.006	2.11	-3.2746	2	0	1	2	0	0	0	0	2	1	0	0	0	0	0	0	0	250850	36761	0	0	0	0	0	0	0	4013500	0	0	0	0	16	287610	Tb927.11.5290	Tb927.11.5290_mitochondrial carrier protein (MCP9) | location=Tb927_11_v5.1:1508940-1509788(+) | length=282 | sequence_SO=chromosome | SO=protein_coding
Tb927.8.4330	small GTP-binding protein Rab11	Vesicular.transport	0	0	2.87	-2.3	2.11	-2.8675	0	0	1	2	1	0	0	0	0	0	1	2	0	243150	0	0	0	0	0	126770	294280	0	0	0	0	0	0	0	0	3825600	0	13	664200	Tb927.8.4330	Tb927.8.4330_small GTP-binding protein Rab11 (RAB11) | location=Tb927_08_v5.1:1285929-1286579(-) | length=216 | sequence_SO=chromosome | SO=protein_coding
Tb927.5.1210	short-chain dehydrogenase, putative	Enzyme	0	0	0.421	-0.6745	2.1	-3.5703	1	0	1	2	0	1	1	1	0	0	0	0	0	0	59821	0	104070	0	0	0	0	0	0	0	0	1769100	0	0	0	0	0	17	163890	Tb927.5.1210	Tb927.5.1210_short-chain dehydrogenase, putative | location=Tb927_05_v5.1:462078-463013(+) | length=311 | sequence_SO=chromosome | SO=protein_coding
Tb927.3.1380	ATP synthase subunit beta, mitochondrial (ATPB)	Mito.e.transport	0	0	0.314	-0.4759	2.1	-3.2124	0	0	1	3	3	0	0	0	0	0	0	0	0	240190	0	0	0	0	0	0	0	0	5284200	0	0	0	0	0	0	0	0	22	240190	Tb927.3.1380	Tb927.3.1380_ATP synthase beta chain, mitochondrial precursor,ATP synthase F1, beta subunit | location=Tb927_03_v5.1:344483-346042(+) | length=519 | sequence_SO=chromosome | SO=protein_coding
Tb927.11.5440	malic enzyme	Mito.pathway	1	0	2.57	2.1972	2.1	-2.9557	11	3	1	15	6	3	4	0	9	11	2	2	2	1361800	414600	523540	0	1208700	2715700	239490	27856	180750	36553000	18504000	17580000	0	33450000	61972000	0	0	0	27	6672500	Tb927.11.5440	Tb927.11.5440_malic enzyme | location=Tb927_11_v5.1:1546913-1548607(+) | length=564 | sequence_SO=chromosome | SO=protein_coding
Tb927.7.4470	translocon-associated protein gamma 4 transmembrane domains	Vesicular.transport	0	0	0.511	-0.7625	2.1	-5.5917	2	0	1	2	0	0	0	2	0	0	0	0	0	0	0	0	4450800	0	0	0	0	0	0	0	0	26705000	0	0	0	0	0	6	4450800	Tb927.7.4470	Tb927.7.4470_hypothetical protein, conserved | location=Tb927_07_v5.1:1190312-1190893(-) | length=193 | sequence_SO=chromosome | SO=protein_coding
Tb927.11.6590	aminopeptidase, putative,metallo-peptidase, Clan MF, Family M17	Protease	0	0	0.179	-0.4563	2.08	-2.9829	0	0	2	4	2	0	2	0	0	0	0	0	3	313380	0	155270	0	0	0	0	0	207710	8465600	0	0	0	0	0	0	0	4561700	25	676360	Tb927.11.6590;Tb11.v5.0360	Tb927.11.6590_aminopeptidase, putative,metallo-peptidase, Clan MF, Family M17 | location=Tb927_11_v5.1:1853205-1854770(-) | length=521 | sequence_SO=chromosome | SO=protein_coding
Tb927.7.1300	protein disulfide isomerase,ERp72-like, cofactor wth calnexin, putative	Chaperone	0	0	0.985	1.3898	2.07	-1.8814	2	2	1	2	2	2	2	0	0	2	0	1	1	406090	182280	267180	0	0	147160	0	57068	88326	9668400	4427400	6422100	0	0	3547300	0	0	0	24	1148100	Tb927.7.1300	Tb927.7.1300_protein disulfide isomerase, putative | location=Tb927_07_v5.1:334736-335869(+) | length=377 | sequence_SO=chromosome | SO=protein_coding
Tb927.9.12510	DED1-2, ATP-dependent DEAD/H RNA helicase, DED1-2	Translation	0	0	0.382	-0.5105	2.07	-2.8738	1	1	1	2	2	1	1	1	0	1	1	1	1	34751	0	21921	0	0	0	0	0	0	0	0	1008400	0	0	0	0	0	0	46	56672	Tb927.9.12510	Tb927.9.12510_ATP-dependent DEAD/H RNA helicase, putative (DED1) | location=Tb927_09_v5.1:1959337-1961544(+) | length=735 | sequence_SO=chromosome | SO=protein_coding
Tb927.10.15330	CYTH domain containing protein, putative	ZUnknown	0	0	4.68	-4.3342	2.07	-2.9854	0	0	2	7	0	0	0	0	0	0	4	3	4	0	0	0	0	0	0	512450	191930	425920	0	0	0	0	0	0	15044000	10081000	14436000	35	1130300	Tb927.10.15330;Tb11.v5.0348	Tb927.10.15330_hypothetical protein, conserved | location=Tb927_10_v5.1:3753481-3755298(+) | length=605 | sequence_SO=chromosome | SO=protein_coding;Tb11.v5.0348 | organism=Trypanosoma_brucei_TREU927 | produc
Tb927.8.7780	hypothetical protein, conserved	ZUnknown	0	0	0.914	-1.127	2.07	-2.7068	0	0	1	5	0	0	0	0	0	0	0	0	2	0	0	0	0	0	0	0	0	82284	0	0	0	0	0	0	0	0	3044500	37	82284	Tb927.8.7780	Tb927.8.7780_hypothetical protein, conserved | location=Tb927_08_v5.1:2261587-2264055(+) | length=822 | sequence_SO=chromosome | SO=protein_coding
Tb927.5.1110	60S ribosomal protein L2 L8	Ribosome	0	0	1.67	-3.285	2.06	-3.1113	0	0	2	3	0	0	0	0	0	0	0	0	3	0	0	0	0	0	0	0	0	1449100	0	0	0	0	0	0	0	0	18838000	13	1449100	Tb927.5.1110;Tb927.11.16280	Tb927.5.1110_60S ribosomal protein L2, putative,60S ribosomal protein L8, putative | location=Tb927_05_v5.1:419367-420149(+) | length=260 | sequence_SO=chromosome | SO=protein_coding;Tb927.11.16280 | organism
Tb927.10.520	Mitochondrial ATP synthase subunit, putative	Mito.pathway	0	0	0.592	0.9684	2.04	-2.4852	1	0	1	2	0	0	0	1	1	0	0	0	0	0	0	0	71753	51937	0	0	0	0	0	0	0	1363300	0	0	0	0	0	19	123690	Tb927.10.520	Tb927.10.520_hypothetical protein, conserved | location=Tb927_10_v5.1:134180-135370(+) | length=396 | sequence_SO=chromosome | SO=protein_coding
Tb927.11.16730	dihydrolipoyl dehydrogenase (GCVL-2)	Mito.citric.acid.cycle	0	0	4.89	-4.367	2.03	-2.6193	0	0	1	7	1	0	1	0	0	0	4	3	4	67164	0	69184	0	0	0	601640	262960	709890	0	0	0	0	0	0	12319000	8815000	19803000	26	1710800	Tb927.11.16730	Tb927.11.16730_dihydrolipoyl dehydrogenase (GCVL-2) | location=Tb927_11_v5.1:4452120-4453553(-) | length=477 | sequence_SO=chromosome | SO=protein_coding
Tb927.6.1090	proteasome regulatory ATPase subunit 3 (RPT3)	Ubiquitin.proteasome	0	0	0.0732	0.2047	2.03	-3.0179	1	1	1	2	1	1	2	0	0	1	0	0	0	284670	115750	165910	0	0	124810	0	0	0	0	0	3981800	0	0	0	0	0	0	24	691140	Tb927.6.1090	Tb927.6.1090_proteasome regulatory ATPase subunit 3 (RPT3) | location=Tb927_06_v5.1:430187-431398(-) | length=403 | sequence_SO=chromosome | SO=protein_coding
Tb927.10.10160	KPAF4	Mito.pathway	0	0	1.76	-2.4124	2.02	-2.6006	0	0	1	2	0	0	1	0	0	0	0	2	1	0	0	93084	0	0	0	0	432660	146750	0	0	0	0	0	0	0	6922500	0	16	672490	Tb927.10.10160	Tb927.10.10160_hypothetical protein, conserved | location=Tb927_10_v5.1:2500846-2502012(+) | length=388 | sequence_SO=chromosome | SO=protein_coding
Tb927.7.2780	XAC1	RNA.degradation	0	0	3.66	-3.6805	2.02	-2.3569	0	0	1	2	0	0	0	0	0	0	2	2	1	0	0	0	0	0	0	709580	1059600	314880	0	0	0	0	0	0	4981500	7402900	0	7	2084100	Tb927.7.2780	Tb927.7.2780_hypothetical protein, conserved | location=Tb927_07_v5.1:722307-722660(+) | length=117 | sequence_SO=chromosome | SO=protein_coding
Tb927.8.6800	hypothetical protein, conserved	Mito.pathway	0	0	0.345	-0.3457	2.01	-2.3832	0	0	1	2	1	0	2	0	0	0	0	0	0	56761	0	65242	0	0	0	0	0	0	0	0	1826800	0	0	0	0	0	0	28	122000	Tb927.8.6800	Tb927.8.6800_hypothetical protein, conserved | location=Tb927_08_v5.1:1964700-1966457(-) | length=585 | sequence_SO=chromosome | SO=protein_coding
Tb927.11.1020	ribokinase, putative	PPP	0	0	0.358	-0.3665	2.01	-2.2997	0	0	1	1	0	0	1	0	0	0	0	0	0	0	0	118310	0	0	0	0	0	0	0	0	1774700	0	0	0	0	0	0	15	118310	Tb927.11.1020	Tb927.11.1020_ribokinase, putative | location=Tb927_11_v5.1:260682-261683(+) | length=333 | sequence_SO=chromosome | SO=protein_coding
Tb927.11.6300	40S ribosomal protein S5	Ribosome	0	1	0.161	-0.296	2.01	2.3706	1	4	1	8	7	4	6	0	1	1	5	2	6	20405000	4995200	6475500	0	337940	484790	5866000	1571900	11099000	156950000	31975000	69999000	0	0	0	65586000	30354000	98855000	9	51235000	Tb927.11.6300	Tb927.11.6300_40S ribosomal protein S5, putative | location=Tb927_11_v5.1:1772246-1772818(-) | length=190 | sequence_SO=chromosome | SO=protein_coding
Tb927.5.2290	U5 splicing factor U5-200K, putative or BRR2 homologue	RNA.processing	0	0	0.439	-0.8271	2.01	-3.1704	0	0	1	2	0	0	2	0	0	0	0	0	0	0	0	30191	0	0	0	0	0	0	0	0	3592700	0	0	0	0	0	0	119	30191	Tb927.5.2290	Tb927.5.2290_ATP-dependent RNA helicase, putative | location=Tb927_05_v5.1:766450-773163(+) | length=2237 | sequence_SO=chromosome | SO=protein_coding
Tb927.10.2320	TbNup41 Outer ring	Nuclear.transport	1	1	4.4	4.9298	2	2.5482	0	4	1	8	6	4	6	0	0	0	0	0	0	2858500	1070600	1773400	0	0	0	0	0	0	50346000	17488000	29109000	0	0	0	0	0	0	17	5702500	Tb927.10.2320	Tb927.10.2320_hypothetical protein, conserved | location=Tb927_10_v5.1:599823-600968(+) | length=381 | sequence_SO=chromosome | SO=protein_coding
Tb927.11.4190	hypothetical protein, conserved, Peptidase M24-like	Protease	0	0	0.801	-1.0763	2	-2.5138	0	0	1	3	0	1	0	0	0	0	2	1	0	0	64524	0	0	0	0	158300	61792	0	0	0	0	0	0	0	3640800	0	0	23	284610	Tb927.11.4190	Tb927.11.4190_hypothetical protein, conserved | location=Tb927_11_v5.1:1225390-1227006(-) | length=538 | sequence_SO=chromosome | SO=protein_coding
Tb11.0840	hypothetical protein, conserved, no yeast or human match	ZUnknown	0	0	0.0608	-0.1432	2	-2.6141	0	1	2	2	1	1	1	0	0	0	1	0	0	212970	140890	195790	0	0	0	167230	0	0	0	0	2153700	0	0	0	0	0	0	11	716880	Tb11.0840;Tb927.11.720	Tb11.0840_hypothetical protein,chrXI additional, unordered contigs | location=tryp_XI-147f01.q1ca:1458-2243(+) | length=261 | sequence_SO=contig | SO=protein_coding;Tb927.11.720 | organism=Trypanosoma_brucei_
Tb927.6.990	cysteine peptidase precursor, Clan CA, family C1, Cathepsin L-like (CP)	Protease	0	0	0.67	-1.3772	1.99	-2.5735	0	0	9	1	0	0	0	0	0	0	0	0	1	0	0	0	0	0	0	0	0	411120	0	0	0	0	0	0	0	0	4111200	10	411120	Tb927.6.990;Tb927.6.1060;Tb927.6.1050;Tb927.6.1000;Tb927.6.980;Tb927.6.970;Tb927.6.960;Tb927.6.1020;Tb927.6.1010	Tb927.6.990_cysteine peptidase precursor,cysteine peptidase, Clan CA, family C1, Cathepsin L-like (CP) | location=Tb927_06_v5.1:409870-411219(-) | length=449 | sequence_SO=chromosome | SO=protein_coding;Tb927
Tb927.5.2000	hypothetical protein copurifies with MKT1 & XAC1, one Q8, salivaria & stercoraria only, well translated only in bloodstream forms	ZUnknown	0	0	1.55	-2.1517	1.99	-3.293	0	0	1	2	0	0	0	0	0	0	1	1	1	0	0	0	0	0	0	219790	0	107650	0	0	0	0	0	0	0	0	1722400	16	327440	Tb927.5.2000	Tb927.5.2000_hypothetical protein | location=Tb927_05_v5.1:678171-679256(+) | length=361 | sequence_SO=chromosome | SO=protein_coding
Tb927.2.1860	REMC2 mitochondrial RNA binding complex 1 subunit (MRB1860)	Mito.RNA	1	2	5.64	4.7289	1.98	2.2913	0	11	1	19	12	11	13	0	0	0	0	0	0	1468800	1161200	1349400	0	0	0	0	0	0	67326000	50099000	69607000	0	0	0	0	0	0	47	3979400	Tb927.2.1860	Tb927.2.1860_mitochondrial RNA binding complex 1 subunit (MRB1860) | location=Tb927_02_v5.1:347030-349648(+) | length=872 | sequence_SO=chromosome | SO=protein_coding
Tb927.11.13080	hypothetical protein, conserved	ZUnknown	0	0	0.0432	-0.0772	1.98	-2.3396	0	1	1	1	1	1	1	0	0	0	0	0	0	165840	88643	186030	0	0	0	0	0	0	0	0	3348600	0	0	0	0	0	0	18	440510	Tb927.11.13080	Tb927.11.13080_hypothetical protein, conserved | location=Tb927_11_v5.1:3494463-3496043(-) | length=526 | sequence_SO=chromosome | SO=protein_coding
Tb927.11.11790	R3H domain containing protein, putative	ZUnknown	0	2	0.428	0.6854	1.97	2.2874	0	5	1	13	9	7	5	0	0	0	7	10	0	1537300	998270	696680	0	0	0	675850	952610	0	35967000	28613000	27577000	0	0	0	20268000	23676000	0	28	4860700	Tb927.11.11790	Tb927.11.11790_hypothetical protein, conserved | location=Tb927_11_v5.1:3163236-3164897(+) | length=553 | sequence_SO=chromosome | SO=protein_coding
Tb927.10.4950	U2 small nuclear ribonucleoprotein 16.5K SSm2-2/Sm16.5K	RNA.processing	0	0	0.869	-1.531	1.96	-2.732	0	0	1	2	0	0	0	0	0	0	0	2	0	0	0	0	0	0	0	0	546170	0	0	0	0	0	0	0	0	3823200	0	7	546170	Tb927.10.4950	Tb927.10.4950_U2 small nuclear ribonucleoprotein 16.5K | location=Tb927_10_v5.1:1230386-1230781(-) | length=131 | sequence_SO=chromosome | SO=protein_coding
Tb927.10.7340	40S ribosomal protein S24E	Ribosome	0	0	0.979	-3.294	1.95	-2.7258	0	0	2	4	0	0	0	0	0	0	0	0	4	0	0	0	0	0	0	0	0	18827000	0	0	0	0	0	0	0	0	56480000	3	18827000	Tb927.10.7340;Tb927.10.7330	Tb927.10.7340_40S ribosomal protein S24E, putative | location=Tb927_10_v5.1:1851299-1851712(-) | length=137 | sequence_SO=chromosome | SO=protein_coding;Tb927.10.7330 | organism=Trypanosoma_brucei_TREU927 | p
Tb927.10.6640	COP-coated vesicle membrane protein erv25 precursor,	Vesicular.transport	0	0	5.04	-6.5845	1.95	-2.3097	0	0	1	11	0	1	0	0	0	0	11	9	4	0	0	0	0	0	0	6838600	3797700	471810	0	0	0	0	0	0	100390000	61176000	14307000	16	11108000	Tb927.10.6640	Tb927.10.6640_COP-coated vesicle membrane protein erv25 precursor, putative,ER--golgi transport protein erv25 precursor, putative | location=Tb927_10_v5.1:1681023-1681784(+) | length=253 | sequence_SO=chromos
Tb927.10.7080	ATP-dependent DEAD/H RNA helicase, putative, no clear yeast homologue	RNA.helicase	0	0	0.239	-0.5376	1.94	-3.0449	0	0	1	1	0	1	0	0	0	0	0	0	0	0	111450	0	0	0	0	0	0	0	0	3343600	0	0	0	0	0	0	0	30	111450	Tb927.10.7080	Tb927.10.7080_ATP-dependent DEAD/H RNA helicase, putative,RNA helicase, putative | location=Tb927_10_v5.1:1781506-1783158(+) | length=550 | sequence_SO=chromosome | SO=protein_coding
Tb927.7.4570	inosine-guanine nucleoside hydrolase (IG-NH)	Nucleotides	0	0	0.622	-1.958	1.93	-4.6887	1	0	2	1	1	0	1	0	0	1	0	0	1	180790	0	138190	0	0	56728	0	0	87367	0	0	0	0	0	0	0	0	1660000	19	463070	Tb927.7.4570;Tb11.v5.0270	Tb927.7.4570_inosine-guanine nucleoside hydrolase (IG-NH) | location=Tb927_07_v5.1:1214602-1215675(-) | length=357 | sequence_SO=chromosome | SO=protein_coding;Tb11.v5.0270 | organism=Trypanosoma_brucei_TREU9
Tb927.8.1110	40S ribosomal protein S9 190aa, 22KDa	Ribosome	0	0	0.899	-3.1014	1.93	-2.6127	0	0	2	8	0	1	0	0	0	0	0	0	8	0	104360	0	0	0	0	0	0	13938000	0	0	0	0	0	0	0	0	148610000	11	14042000	Tb927.8.1110;Tb927.10.5610	Tb927.8.1110_40S ribosomal protein S9, putative | location=Tb927_08_v5.1:355351-355923(-) | length=190 | sequence_SO=chromosome | SO=protein_coding;Tb927.10.5610 | organism=Trypanosoma_brucei_TREU927 | produc
Tb927.8.3750	NOP56	rRNA.tRNA.process	0	2	1.65	1.3929	1.93	2.0567	0	7	1	11	7	9	7	0	0	0	2	6	1	1348700	1584200	915500	0	0	0	230580	557310	164920	37685000	41941000	18764000	0	0	0	11376000	15413000	0	27	4801200	Tb927.8.3750	Tb927.8.3750_nucleolar protein, putative | location=Tb927_08_v5.1:1120185-1121636(-) | length=483 | sequence_SO=chromosome | SO=protein_coding
Tb927.10.15720	Proteasome regulatory non-ATP-ase subunit 9 (RPN9)	Ubiquitin.proteasome	0	0	0.333	-0.6634	1.92	-3.3046	2	0	1	4	3	1	0	0	0	2	0	0	0	247720	54231	0	0	0	122220	0	0	0	5202200	0	0	0	0	0	0	0	0	21	424170	Tb927.10.15720	Tb927.10.15720_proteasome regulatory non-ATP-ase subunit 9,19S proteasome regulatory subunit (RPN9) | location=Tb927_10_v5.1:3869048-3870265(+) | length=405 | sequence_SO=chromosome | SO=protein_coding
Tb927.4.3350	N2227-like protein, putative	ZUnknown	0	0	0.842	-2.0908	1.92	-3.3471	0	0	1	4	2	0	0	0	0	0	4	1	1	229220	0	0	0	0	0	424580	64100	87988	4126300	0	0	0	0	0	4373100	0	0	13	805890	Tb927.4.3350	Tb927.4.3350_hypothetical protein, conserved | location=Tb927_04_v5.1:873796-875049(-) | length=417 | sequence_SO=chromosome | SO=protein_coding
Tb927.6.2790	L-threonine 3-dehydrogenase, putative	Mito.pathway	0	0	0.273	0.3066	1.91	-1.9116	2	1	1	3	2	1	3	0	0	2	1	1	1	448580	188210	463640	0	0	341250	104000	140530	253310	10327000	0	7465800	0	0	7276100	0	0	0	20	1939500	Tb927.6.2790	Tb927.6.2790_L-threonine 3-dehydrogenase, putative | location=Tb927_06_v5.1:836359-837357(+) | length=332 | sequence_SO=chromosome | SO=protein_coding
Tb927.11.9530	14-3-3-I protein	Signalling	0	0	0.191	-0.2002	1.91	-2.2249	9	4	1	9	6	4	4	0	3	9	3	4	3	2820200	777150	1007900	0	624890	3197100	277970	932970	805100	30498000	12632000	14796000	0	11351000	42183000	7842100	17896000	19450000	15	10443000	Tb927.11.9530	Tb927.11.9530_14-3-3-I protein | location=Tb927_11_v5.1:2600057-2600885(-) | length=262 | sequence_SO=chromosome | SO=protein_coding
Tb927.11.7020	proteasome alpha 7 subunit, putative (PSA4)	Ubiquitin.proteasome	0	0	0.244	-0.4087	1.91	-3.0209	0	0	1	2	1	0	0	0	0	0	0	0	1	145930	0	0	0	0	0	0	0	30802	0	0	0	0	0	0	0	0	492830	16	176730	Tb927.11.7020	Tb927.11.7020_proteasome alpha 7 subunit, putative (PSA4) | location=Tb927_11_v5.1:1977633-1978376(-) | length=247 | sequence_SO=chromosome | SO=protein_coding
Tb927.10.11390	60S ribosomal protein L6	Ribosome	0	2	0.132	-0.4724	1.9	4.3059	0	2	1	14	2	14	14	0	0	0	10	5	6	601350	27991000	19593000	0	0	0	12493000	1983600	4271100	8642100	302970000	208960000	0	0	0	142320000	27576000	45785000	11	66933000	Tb927.10.11390	Tb927.10.11390_60S ribosomal protein L6, putative | location=Tb927_10_v5.1:2777404-2777982(+) | length=192 | sequence_SO=chromosome | SO=protein_coding
Tb927.4.4820	amino acid transporter 10, putative (AATP10)	Amino.acid.transport	0	0	0.891	-1.219	1.89	-4.2678	2	0	4	2	0	0	0	2	0	0	0	0	0	0	0	0	395810	0	0	0	0	0	0	0	0	6333000	0	0	0	0	0	16	395810	Tb927.4.4820;Tb11.v5.0540;Tb927.4.4860;Tb927.4.4840	Tb927.4.4820_amino acid transporter 10, putative (AATP10) | location=Tb927_04_v5.1:1317708-1319180(-) | length=490 | sequence_SO=chromosome | SO=protein_coding;Tb11.v5.0540 | organism=Trypanosoma_brucei_TREU9
Tb927.10.10130	REMC1 mitochondrial RNA binding complex 1 subunit (MRB10130)	Mito.RNA	1	0	5.23	5.2384	1.89	2.0765	2	7	1	11	9	7	8	0	2	1	0	0	0	2223700	2023900	2587200	0	72502	44755	0	0	0	51810000	48129000	63500000	0	1809800	0	0	0	0	25	6952000	Tb927.10.10130	Tb927.10.10130_mitochondrial RNA binding complex 1 subunit (MRB10130) | location=Tb927_10_v5.1:2495034-2496671(+) | length=545 | sequence_SO=chromosome | SO=protein_coding
Tb927.8.5580	VPS13; N-terminal region of Chorein, a TM vesicle-mediated sorter/Integral peroxisomal membrane peroxin,	Vesicular.transport	0	0	0.942	-2.3688	1.89	-2.8042	0	0	1	18	0	0	0	0	0	0	0	0	18	0	0	0	0	0	0	0	0	267510	0	0	0	0	0	0	0	0	62063000	232	267510	Tb927.8.5580	Tb927.8.5580_hypothetical protein, conserved | location=Tb927_08_v5.1:1644049-1658481(+) | length=4810 | sequence_SO=chromosome | SO=protein_coding
Tb927.11.15150	1-acyl-sn-glycerol-3-phosphate acyltransferase, putative	Lipids	0	0	0.109	-0.2672	1.88	-4.2543	2	0	1	2	0	0	0	2	0	0	0	0	0	0	0	0	447590	0	0	0	0	0	0	0	0	6266200	0	0	0	0	0	14	447590	Tb927.11.15150	Tb927.11.15150_1-acyl-sn-glycerol-3-phosphate acyltransferase, putative | location=Tb927_11_v5.1:4028205-4029020(-) | length=271 | sequence_SO=chromosome | SO=protein_coding
Tb927.4.4160	REMC5 mitochondrial RNA binding protein MRB4160 MRB complex component	Mito.RNA	1	2	5.18	5.4245	1.88	2.8858	0	10	1	30	16	10	15	0	0	0	0	1	0	1976200	809330	2006600	0	0	0	0	0	0	104870000	43089000	86856000	0	0	0	0	0	0	49	4792100	Tb927.4.4160	Tb927.4.4160_mitochondrial RNA binding protein (MRB4160) | location=Tb927_04_v5.1:1100829-1103576(-) | length=915 | sequence_SO=chromosome | SO=protein_coding
Tb927.3.4070	pyruvate transporter PT1	Transporter	0	0	0.247	-0.5131	1.88	-3.1343	0	0	1	1	0	0	0	0	0	0	1	0	0	0	0	0	0	0	0	0	0	0	0	0	0	0	0	0	0	0	0	16	0	Tb927.3.4070	Tb927.3.4070_hypothetical protein, conserved | location=Tb927_03_v5.1:1148036-1149793(-) | length=585 | sequence_SO=chromosome | SO=protein_coding
Tb927.10.5480	60S ribosomal protein L24	Ribosome	0	0	0.88	-2.3824	1.87	-2.6874	0	0	2	3	0	0	0	0	0	0	0	0	3	0	0	0	0	0	0	0	0	3171100	0	0	0	0	0	0	0	0	15856000	5	3171100	Tb927.10.5480;Tb927.10.5460	Tb927.10.5480_60S ribosomal protein L24, putative | location=Tb927_10_v5.1:1377506-1377883(+) | length=125 | sequence_SO=chromosome | SO=protein_coding;Tb927.10.5460 | organism=Trypanosoma_brucei_TREU927 | pr
Tb927.8.8030	emp24/gp25L/p24 family/GOLD	Vesicular.transport	0	0	4.9	-5.803	1.87	-3.1391	1	0	1	3	1	0	0	1	0	0	2	3	3	375500	0	0	181880	0	0	4993200	4054400	2249200	0	0	0	0	0	0	29470000	17597000	9416700	5	11854000	Tb927.8.8030	Tb927.8.8030_hypothetical protein, conserved | location=Tb927_08_v5.1:2380153-2380991(+) | length=205 | sequence_SO=chromosome | SO=protein_coding
Tb927.10.1550	proteasome regulatory non-ATP-ase subunit 5 (RPN5)	Ubiquitin.proteasome	0	0	0.116	-0.2734	1.86	-2.8981	0	0	1	1	1	0	0	0	0	0	0	0	0	39207	0	0	0	0	0	0	0	0	1137000	0	0	0	0	0	0	0	0	29	39207	Tb927.10.1550	Tb927.10.1550_proteasome regulatory non-ATP-ase subunit 5,19S proteasome regulatory subunit (RPN5) | location=Tb927_10_v5.1:425467-426915(-) | length=482 | sequence_SO=chromosome | SO=protein_coding
Tb927.11.1890	WD domain, G-beta repeat, putative	ZUnknown	0	0	0.83	-1.5448	1.86	-3.0186	1	0	1	2	2	0	0	0	0	1	0	0	0	42589	0	0	0	0	0	0	0	0	809190	0	0	0	0	0	0	0	0	19	42589	Tb927.11.1890	Tb927.11.1890_hypothetical protein, conserved | location=Tb927_11_v5.1:554775-555812(-) | length=326 | sequence_SO=chromosome | SO=protein_coding
Tb927.8.4240	hypothetical protein, conserved	Mito.pathway	0	0	0.559	-0.8554	1.85	-2.1878	0	0	1	1	0	1	0	0	0	0	0	0	0	0	38921	0	0	0	0	0	0	0	0	2607700	0	0	0	0	0	0	0	67	38921	Tb927.8.4240	Tb927.8.4240_hypothetical protein, conserved | location=Tb927_08_v5.1:1257854-1262923(-) | length=1689 | sequence_SO=chromosome | SO=protein_coding
Tb927.5.1340	component of PRP19 complex, putative	RNA.processing	0	2	2.76	-2.9646	1.85	-2.3489	0	1	2	9	5	2	1	0	0	0	5	4	0	53106	64283	40268	0	0	0	205340	188290	0	0	0	0	0	0	0	9398700	8708300	0	46	551290	Tb927.5.1340;Tb11.v5.0884	Tb927.5.1340_hypothetical protein, conserved | location=Tb927_05_v5.1:493694-496156(+) | length=820 | sequence_SO=chromosome | SO=protein_coding
Tb927.6.4770	MKT1	RNA.degradation	0	0	5.64	-8.3715	1.84	-3.0502	1	2	1	25	3	2	4	0	0	1	23	22	19	146950	90025	142860	0	0	25937	7206700	5902600	4563100	3221300	2310700	4412200	0	0	0	227730000	193510000	158700000	33	18078000	Tb927.6.4770	Tb927.6.4770_protein mkt1, putative | location=Tb927_06_v5.1:1327592-1330497(+) | length=735 | sequence_SO=chromosome | SO=protein_coding
Tb927.11.2610	hypothetical protein, conserved, no domains, no yeast or human match	Cytoskeleton	0	0	0.704	0.6984	1.83	-1.391	1	1	1	2	2	1	1	1	1	1	1	1	1	427840	259970	278020	22649	25106	75274	71728	67467	82044	11124000	0	0	0	0	0	0	0	0	26	1310100	Tb927.11.2610	Tb927.11.2610_hypothetical protein, conserved | location=Tb927_11_v5.1:766107-767492(-) | length=461 | sequence_SO=chromosome | SO=protein_coding
Tb927.3.2960	inosine-adenosine-guanosine-nucleosidehydrolase (IAGNH)	Nucleotides	0	0	0.624	-1.0247	1.83	-2.1923	2	1	1	4	3	1	2	0	1	2	0	1	2	531000	254500	553660	0	34314	407770	0	132020	604050	0	0	0	0	0	6076300	0	0	9101000	15	2517300	Tb927.3.2960	Tb927.3.2960_inosine-adenosine-guanosine-nucleosidehydrolase,IAG-nucleoside hydrolase (IAGNH) | location=Tb927_03_v5.1:763717-764700(-) | length=327 | sequence_SO=chromosome | SO=protein_coding
Tb927.10.190	40S ribosomal protein S6	Ribosome	0	0	1.21	-3.7059	1.83	-2.3573	0	0	1	6	0	0	0	0	0	0	0	0	6	0	0	0	0	0	0	0	0	11203000	0	0	0	0	0	0	0	0	98627000	9	11203000	Tb927.10.190	Tb927.10.190_40S ribosomal protein S6, putative | location=Tb927_10_v5.1:73558-74310(+) | length=250 | sequence_SO=chromosome | SO=protein_coding
Tb927.10.3560	arginine N-methyltransferase, PRMT1 prozyme	Arg.methylation	0	0	0.42	-0.7466	1.81	-3.1042	0	0	1	1	1	1	0	0	0	0	1	0	1	91362	53156	0	0	0	0	61508	0	40094	0	0	0	0	0	0	0	0	922160	23	246120	Tb927.10.3560	Tb927.10.3560_arginine N-methyltransferase, putative | location=Tb927_10_v5.1:921972-923141(+) | length=389 | sequence_SO=chromosome | SO=protein_coding
Tb927.5.3810	orotidine-5-phosphate decarboxylase/orotate phosphoribosyltransferase, OMPDCase-OPRTase	Nucleotides	1	0	2.9	2.7908	1.81	-2.6194	7	2	1	12	5	9	2	0	5	7	0	0	0	791660	1086900	205270	0	683710	980040	0	0	0	17706000	18700000	9839900	0	15519000	20682000	0	0	0	22	3747600	Tb927.5.3810	Tb927.5.3810_orotidine-5-phosphate decarboxylase/orotate phosphoribosyltransferase, putative,OMPDCase-OPRTase, putative | location=Tb927_05_v5.1:1246263-1247652(+) | length=458 | sequence_SO=chromosome | SO=p
Tb927.11.2370	MEX67	Nuclear.transport	0	0	0.00568	-0.0146	1.8	-2.8515	0	0	1	5	4	3	0	0	0	0	0	0	0	295580	114780	0	0	0	0	0	0	0	7094000	0	0	0	0	0	0	0	0	24	410370	Tb927.11.2370	Tb927.11.2370_hypothetical protein, conserved | location=Tb927_11_v5.1:679550-682424(+) | length=575 | sequence_SO=chromosome | SO=protein_coding
Tb927.10.10390	trypanothione reductase	Redox	0	0	0.135	-0.2868	1.8	-2.4088	0	0	1	3	1	0	0	0	0	0	0	0	3	183980	0	0	0	0	0	0	0	88249	3679600	0	0	0	0	0	0	0	0	20	272230	Tb927.10.10390	Tb927.10.10390_trypanothione reductase | location=Tb927_10_v5.1:2562393-2563871(-) | length=492 | sequence_SO=chromosome | SO=protein_coding
Tb927.11.9730	60S ribosomal protein L34	Ribosome	0	0	0.726	-2.5247	1.79	-2.7562	0	0	2	3	0	0	0	0	0	0	0	0	3	0	0	0	0	0	0	0	0	10917000	0	0	0	0	0	0	0	0	32751000	3	10917000	Tb927.11.9730;Tb927.10.12680	Tb927.11.9730_60S ribosomal protein L34, putative | location=Tb927_11_v5.1:2634550-2635062(-) | length=170 | sequence_SO=chromosome | SO=protein_coding;Tb927.10.12680 | organism=Trypanosoma_brucei_TREU927 | p
Tb927.11.14130	60S ribosomal protein L18	Ribosome	0	0	1.18	-2.6956	1.79	-2.5338	0	0	2	5	0	0	0	0	0	0	0	0	5	0	0	0	0	0	0	0	0	2315800	0	0	0	0	0	0	0	0	23158000	10	2315800	Tb927.11.14130;Tb927.10.3840	Tb927.11.14130_ribosomal protein L18, putative | location=Tb927_11_v5.1:3745050-3745589(+) | length=179 | sequence_SO=chromosome | SO=protein_coding;Tb927.10.3840 | organism=Trypanosoma_brucei_TREU927 | produ
Tb927.4.1930	EIF3G	Translation	0	0	0.0116	-0.0211	1.79	-1.964	0	0	1	1	0	0	0	0	0	0	0	1	0	0	0	0	0	0	0	0	40410	0	0	0	0	0	0	0	0	525330	0	13	40410	Tb927.4.1930	Tb927.4.1930_RNA-binding protein, putative (EIF3D) | location=Tb927_04_v5.1:490369-491187(-) | length=272 | sequence_SO=chromosome | SO=protein_coding
Tb927.7.4180	Elongase 3	Lipids	0	0	0.46	-0.6714	1.77	-4.2134	3	0	1	3	0	0	0	3	0	0	0	0	0	0	0	0	719770	0	0	0	0	0	0	0	0	9357000	0	0	0	0	0	13	719770	Tb927.7.4180	Tb927.7.4180_fatty acid elongase, putative | location=Tb927_07_v5.1:1114698-1115615(+) | length=305 | sequence_SO=chromosome | SO=protein_coding
Tb927.9.9060	LSM12	RNA.degradation	0	0	5.22	-6.0447	1.77	-2.8596	0	0	1	7	0	0	0	0	0	0	5	6	3	0	0	0	0	0	0	1792600	3031000	2848700	0	0	0	0	0	0	16609000	17620000	25373000	8	7672300	Tb927.9.9060	Tb927.9.9060_Lsm12 protein, putative | location=Tb927_09_v5.1:1448573-1449151(-) | length=190 | sequence_SO=chromosome | SO=protein_coding
Tb927.4.3890	ATP-dependent DEAD/H RNA helicase, weak match to HsDDX39 (translation of structured mRNAs) no clear yeast homologue	RNA.helicase	0	0	0.207	0.4899	1.77	-2.6464	0	0	1	1	0	1	0	0	0	0	0	0	0	0	116400	0	0	0	0	0	0	0	0	6052900	0	0	0	0	0	0	0	52	116400	Tb927.4.3890	Tb927.4.3890_ATP-dependent RNA helicase, putative | location=Tb927_04_v5.1:1021651-1024932(-) | length=1093 | sequence_SO=chromosome | SO=protein_coding
Tb927.4.2310	asparaginyl-tRNA synthetase, putative	Translation.tRNA	0	0	0.569	-1.0116	1.77	-2.9827	0	0	1	1	0	0	0	0	0	0	0	0	1	0	0	0	0	0	0	0	0	20325	0	0	0	0	0	0	0	0	650400	32	20325	Tb927.4.2310	Tb927.4.2310_asparaginyl-tRNA synthetase, putative | location=Tb927_04_v5.1:601224-603245(+) | length=667 | sequence_SO=chromosome | SO=protein_coding
Tb09.v4.0154	ESAG3 pseudogene	ESAG.pseudo	0	0	1.08	-2.0191	1.76	-2.6537	0	0	1	2	0	0	0	0	0	0	1	2	0	0	0	0	0	0	0	243100	641390	0	0	0	0	0	0	0	0	8979400	0	14	884490	Tb09.v4.0154	Tb09.v4.0154_expression site-associated gene (ESAG, pseudogene), putative,expression site-associated gene 3 (ESAG3, pseudogene), putative,chrIX additional, unordered contigs | location=tryp_IXb-314f06.q1c:276
Tb927.4.1800	Mitochondrial ribosomal protein L3	Mito.translation	0	0	0.882	-2.8151	1.76	-2.3336	0	0	2	10	0	0	0	0	0	0	0	0	10	0	0	0	0	0	0	0	0	4004200	0	0	0	0	0	0	0	0	92098000	23	4004200	Tb927.4.1800;Tb927.4.1790	Tb927.4.1800_ribosomal protein L3, mitochondrial, putative | location=Tb927_04_v5.1:449991-451280(-) | length=429 | sequence_SO=chromosome | SO=protein_coding;Tb927.4.1790 | organism=Trypanosoma_brucei_TREU92
Tb927.10.10170	PRL1 / Prp46	RNA.processing	0	0	0.82	-1.5146	1.75	-1.9294	0	0	1	6	2	2	0	0	0	0	2	5	0	166890	155900	0	0	0	0	382910	631760	0	0	0	0	0	0	0	0	13267000	0	21	1337500	Tb927.10.10170	Tb927.10.10170_predicted WD40 repeat protein | location=Tb927_10_v5.1:2502370-2503704(+) | length=444 | sequence_SO=chromosome | SO=protein_coding
Tb927.10.7090	alternative oxidase (AOX or TAO complex)	Glucose.glycerol	0	0	0.741	1.0426	1.74	-2.6095	1	2	1	3	2	2	2	1	1	1	0	1	1	540710	389020	442920	283080	113020	220680	0	178820	216170	12436000	0	0	0	0	0	0	0	0	23	2384400	Tb927.10.7090	Tb927.10.7090_alternative oxidase (AOX) | location=Tb927_10_v5.1:1783506-1784495(+) | length=329 | sequence_SO=chromosome | SO=protein_coding
Tb927.7.2400	MCP1 Arc1p homologue, assists aa tRNA synthetases	Translation.tRNA	0	0	1.27	-1.6316	1.74	-2.5793	0	0	1	2	0	0	0	0	0	0	2	1	1	0	0	0	0	0	0	155070	100690	73746	0	0	0	0	0	0	3256400	0	0	21	329500	Tb927.7.2400	Tb927.7.2400_tyrosyl-tRNA synthetase, putative | location=Tb927_07_v5.1:617425-618752(-) | length=425 | sequence_SO=chromosome | SO=protein_coding
Tb927.9.12650	ubiquitin-activating enzyme e1, putative (UBA2)	Ubiquitin.proteasome	0	0	0.396	-0.8867	1.73	-3.1041	1	1	2	9	3	1	5	0	0	1	0	1	1	149060	17421	162810	0	0	46077	0	21833	20594	0	0	9443100	0	0	0	0	0	0	58	417790	Tb927.9.12650;Tb11.v5.0675	Tb927.9.12650_ubiquitin-activating enzyme E1, putative (UBA2) | location=Tb927_09_v5.1:1986043-1989687(+) | length=1214 | sequence_SO=chromosome | SO=protein_coding
Tb927.3.3190	NEK7 protein kinase	Protein.kinase	0	0	0.401	-0.7998	1.72	-2.5721	0	0	1	2	2	0	0	0	0	0	0	0	0	75784	0	0	0	0	0	0	0	0	2121900	0	0	0	0	0	0	0	0	28	75784	Tb927.3.3190	Tb927.3.3190_serine/threonine-protein kinase, putative,protein kinase, putative | location=Tb927_03_v5.1:822399-824307(-) | length=503 | sequence_SO=chromosome | SO=protein_coding
Tb927.7.6460	FG-GAP repeat protein, putative,intergrin alpha chain protein, putative	Cytoskeleton	0	0	3.76	-3.4537	1.71	-2.2247	0	0	1	4	0	0	0	0	0	0	4	2	2	0	0	0	0	0	0	382890	226310	166940	0	0	0	0	0	0	8833600	8097600	6353000	30	776140	Tb927.7.6460	Tb927.7.6460_FG-GAP repeat protein, putative,intergrin alpha chain protein, putative | location=Tb927_07_v5.1:1753202-1755739(+) | length=845 | sequence_SO=chromosome | SO=protein_coding
Tb927.8.1270	NOP54	Cell.cycle	0	0	0.367	0.519	1.7	-1.9715	0	0	1	3	0	3	0	0	0	0	0	0	0	0	293320	0	0	0	0	0	0	0	0	5866400	0	0	0	0	0	0	0	20	293320	Tb927.8.1270	Tb927.8.1270_hypothetical protein, conserved | location=Tb927_08_v5.1:400702-402162(-) | length=486 | sequence_SO=chromosome | SO=protein_coding
Tb927.11.11480	Trichohyalin, putative	Cytoskeleton	0	0	0.268	-0.4357	1.69	-2.675	0	0	1	2	0	0	1	0	0	0	0	0	1	0	0	0	0	0	0	0	0	28026	0	0	0	0	0	0	0	0	476440	17	28026	Tb927.11.11480	Tb927.11.11480_Trichohyalin, putative | location=Tb927_11_v5.1:3075484-3077460(+) | length=658 | sequence_SO=chromosome | SO=protein_coding
Tb927.10.14240	N-myristoyltransferase (NMT)	GPI.anchors	0	0	0.0314	0.0593	1.68	-2.4604	0	0	2	2	2	0	0	0	0	0	0	0	0	317450	0	0	0	0	0	0	0	0	6983900	0	0	0	0	0	0	0	0	22	317450	Tb927.10.14240;Tb11.v5.0859	Tb927.10.14240_N-myristoyltransferase (NMT) | location=Tb927_10_v5.1:3456872-3458212(-) | length=446 | sequence_SO=chromosome | SO=protein_coding;Tb11.v5.0859_N
Tb927.11.8200	40S ribosomal protein S26	Ribosome	0	0	1.01	-2.5319	1.68	-2.4758	0	0	1	3	0	0	0	0	0	0	0	0	3	0	0	0	0	0	0	0	0	3665900	0	0	0	0	0	0	0	0	14663000	4	3665900	Tb927.11.8200	Tb927.11.8200_ribosomal protein S26, putative | location=Tb927_11_v5.1:2305896-2306231(+) | length=111 | sequence_SO=chromosome | SO=protein_coding
Tb927.11.4300	60S ribosomal protein L18	Ribosome	0	2	2.04	-3.2423	1.68	2.7732	0	2	2	11	10	4	2	0	0	0	7	9	9	20125000	3183700	534860	0	0	0	10278000	24048000	20681000	139620000	28466000	4583000	0	0	0	71564000	156150000	148320000	7	78850000	Tb927.11.4300;Tb927.10.9880	Tb927.11.4300_60S ribosomal protein L18, putative (RPL18) | location=Tb927_11_v5.1:1253829-1254410(-) | length=193 | sequence_SO=chromosome | SO=protein_coding;Tb927.10.9880 | organism=Trypanosoma_brucei_TREU
Tb927.9.6700	hypothetical protein, unlikely	Unlikely	0	0	0.366	-0.6736	1.68	-2.375	0	0	1	1	1	1	0	0	0	0	0	0	0	0	0	0	0	0	0	0	0	0	0	0	0	0	0	0	0	0	0	9	0	Tb927.9.6700	Tb927.9.6700_hypothetical protein, unlikely | location=Tb927_09_v5.1:1102304-1102639(+) | length=111 | sequence_SO=chromosome | SO=protein_coding
Tb927.10.9330	hypothetical protein, conserved, partial PSP1 superfamily (signal peptidase-like), copuriifes with ZC3H12	ZUnknown	0	0	5.86	-7.2336	1.68	-2.8387	2	0	1	15	0	0	0	0	0	2	14	7	9	0	0	0	0	0	0	5238900	1226700	2416500	0	0	0	0	0	0	114330000	48893000	76596000	27	8882200	Tb927.10.9330	Tb927.10.9330_hypothetical protein, conserved | location=Tb927_10_v5.1:2309655-2311466(+) | length=603 | sequence_SO=chromosome | SO=protein_coding
Tb927.10.7410	succinyl-CoA ligase [GDP-forming] beta-chain, putative	Mito.citric.acid.cycle	0	0	0.736	-1.0626	1.67	-2.4588	0	0	1	1	1	0	1	0	0	0	0	0	0	104990	0	108560	0	0	0	0	0	0	0	0	2496900	0	0	0	0	0	0	23	213550	Tb927.10.7410	Tb927.10.7410_succinyl-CoA ligase [GDP-forming] beta-chain, putative | location=Tb927_10_v5.1:1868948-1870207(-) | length=419 | sequence_SO=chromosome | SO=protein_coding
Tb927.10.15870	RNA binding protein, putative, SWAP domain	RNA.binding	0	0	0.289	-0.5987	1.67	-2.1004	0	0	1	1	0	0	0	0	0	0	0	0	1	0	0	0	0	0	0	0	0	186940	0	0	0	0	0	0	0	0	1121700	6	186940	Tb927.10.15870	Tb927.10.15870_RNA binding protein, putative | location=Tb927_10_v5.1:3914983-3915708(+) | length=241 | sequence_SO=chromosome | SO=protein_coding
Tb927.5.4500	ras-like small GTPase, putative (TbSAR1)	Vesicular.transport	0	0	1.52	-1.8142	1.66	-2.1382	3	1	2	7	3	1	5	0	2	3	3	3	4	772480	220460	1403000	0	252230	961840	724630	565920	1507500	12472000	0	12370000	0	0	12249000	10757000	9443800	19867000	13	6408000	Tb927.5.4500;Tb05.5K5.150	Tb927.5.4500_ras-like small GTPase, putative (TbSAR1) | location=Tb927_05_v5.1:1383483-1384100(-) | length=194 | sequence_SO=chromosome | SO=protein_coding;Tb05.5K5.150 | organism=Trypanosoma_brucei_TREU927 |
Tb927.11.4200	ERGIC53 paralogue, lectin-like, ER quality control	Vesicular.transport	0	0	1.19	-3.3595	1.66	-2.1174	0	1	1	9	1	2	1	0	0	0	8	5	0	0	261160	93539	0	0	0	4469800	1806500	0	0	7656100	0	0	0	0	90843000	32251000	0	20	6631100	Tb927.11.4200	Tb927.11.4200_lectin, putative,mannose-specific lectin, putative | location=Tb927_11_v5.1:1227471-1229108(-) | length=545 | sequence_SO=chromosome | SO=protein_coding
Tb927.4.1270	ruvB-like DNA helicase, putative	DNA	0	0	0.106	-0.2201	1.65	-2.6518	0	0	1	1	1	0	0	0	0	0	0	0	1	96554	0	0	0	0	0	0	0	62919	0	0	0	0	0	0	0	0	1510000	24	159470	Tb927.4.1270	Tb927.4.1270_ruvB-like DNA helicase, putative | location=Tb927_04_v5.1:336288-337667(-) | length=459 | sequence_SO=chromosome | SO=protein_coding
Tb927.5.1810	lysosomal/endosomal membrane protein p67 (p67)	Lysosome	0	0	0.268	-0.4239	1.65	-2.7921	0	0	2	1	1	0	0	0	0	0	0	0	0	0	0	0	0	0	0	0	0	0	0	0	0	0	0	0	0	0	0	32	0	Tb927.5.1810;Tb927.5.1830	Tb927.5.1810_lysosomal/endosomal membrane protein p67 (p67) | location=Tb927_05_v5.1:618123-620102(+) | length=659 | sequence_SO=chromosome | SO=protein_coding;Tb927.5.1830 | organism=Trypanosoma_brucei_TREU9
Tb927.2.4230	Nucleoporin NUP-1 protein, putative	Nuclear.transport	0	0	0.0668	-0.193	1.64	-4.1909	6	1	2	7	1	2	1	6	2	1	0	0	1	9872.9	18351	11282	177650	19719	10792	0	0	9500.3	4228800	4737300	4913200	33286000	2857900	4619200	0	0	3991300	228	257170	Tb927.2.4230;Tb11.v5.0827	Tb927.2.4230_NUP-1 protein, putative | location=Tb927_02_v5.1:743098-754041(-) | length=3647 | sequence_SO=chromosome | SO=protein_coding;Tb11.v5.0827_NUP-1 pro
Tb927.4.2180	60S ribosomal protein L35a	Ribosome	0	0	1.19	-3.5334	1.64	-2.8204	0	0	1	6	1	0	0	0	0	0	0	0	6	198280	0	0	0	0	0	0	0	6390000	0	0	0	0	0	0	0	0	51120000	8	6588300	Tb927.4.2180	Tb927.4.2180_60S ribosomal protein L35a, putative | location=Tb927_04_v5.1:560644-561093(+) | length=149 | sequence_SO=chromosome | SO=protein_coding
Tb927.11.3310	ubiquitin-conjugating enzyme, putative,	Ubiquitin.proteasome	0	0	0.17	-0.3314	1.64	-2.8248	0	0	1	1	1	0	1	0	0	0	0	0	0	0	0	0	0	0	0	0	0	0	0	0	0	0	0	0	0	0	0	6	0	Tb927.11.3310	Tb927.11.3310_ubiquitin-conjugating enzyme, putative,ubiquitin-conjugating enzyme-like protein, putative | location=Tb927_11_v5.1:969346-969762(+) | length=138 | sequence_SO=chromosome | SO=protein_coding
Tb927.10.2530	adenylate kinase, putative (ADKF)	Nucleotides	0	0	0.469	-1.0748	1.63	-2.9819	0	0	1	1	0	0	0	0	0	0	0	0	1	0	0	0	0	0	0	0	0	151970	0	0	0	0	0	0	0	0	1823600	12	151970	Tb927.10.2530	Tb927.10.2530_adenylate kinase, putative | location=Tb927_10_v5.1:658114-658782(+) | length=222 | sequence_SO=chromosome | SO=protein_coding
Tb927.7.1780	Adenine phosphoribosyltransferase, putative	Nucleotides	0	0	0.228	-0.4126	1.61	-2.7454	0	0	1	2	2	0	0	0	0	0	0	0	1	352760	0	0	0	0	0	0	0	151980	3527600	0	0	0	0	0	0	0	0	10	504740	Tb927.7.1780	Tb927.7.1780_Adenine phosphoribosyltransferase, putative | location=Tb927_07_v5.1:436819-437526(+) | length=235 | sequence_SO=chromosome | SO=protein_coding
Tb927.10.12740	ZC3H35	RNA.binding	0	0	4.66	-2.0753	1.61	-2.011	0	0	1	3	0	0	0	0	0	0	1	1	3	0	0	0	0	0	0	90610	88388	217920	0	0	0	0	0	0	2797400	2653100	3678600	23	396920	Tb927.10.12740	Tb927.10.12740_zinc finger protein family memeber, putative (ZC3H35) | location=Tb927_10_v5.1:3093176-3094600(-) | length=474 | sequence_SO=chromosome | SO=protein_coding
Tb927.6.1680	Mitochondrial tRNA import	Mito.biogenesis	1	2	4.24	4.613	1.6	2.0288	0	7	1	14	7	11	13	0	0	0	0	0	0	777030	1641600	1986200	0	0	0	0	0	0	39636000	43582000	53332000	0	0	0	0	0	0	31	4404800	Tb927.6.1680	Tb927.6.1680_mitochondrial RNA binding protein 1 (MRB1680) | location=Tb927_06_v5.1:567733-569307(-) | length=524 | sequence_SO=chromosome | SO=protein_coding
Tb927.6.4370	eIF3d	Translation	0	0	0.213	-0.5071	1.6	-2.6488	0	0	1	3	3	1	0	0	0	0	0	0	0	177370	0	0	0	0	0	0	0	0	5321000	0	0	0	0	0	0	0	0	30	177370	Tb927.6.4370	Tb927.6.4370_eukaryotic translation initiation factor 3 subunit 7-like protein | location=Tb927_06_v5.1:1229504-1231024(-) | length=506 | sequence_SO=chromosome | SO=protein_coding
Tb927.5.1100	PEX5 peroxisome targeting signal 1 receptor	Glycosome	0	0	1.46	-2.7951	1.58	-2.1662	0	0	1	5	0	0	0	0	0	0	3	1	4	0	0	0	0	0	0	768880	0	512430	0	0	0	0	0	0	0	0	12811000	25	1281300	Tb927.5.1100	Tb927.5.1100_peroxisome targeting signal 1 receptor (TbPEX5) | location=Tb927_05_v5.1:415484-417451(+) | length=655 | sequence_SO=chromosome | SO=protein_coding
Tb927.10.2900	importin beta-1 subunit, putative	Nuclear.transport	1	2	5.6	4.6406	1.58	2.1698	0	4	2	9	9	4	5	0	0	0	0	0	0	1663300	573510	699460	0	0	0	0	0	0	42471000	30611000	26752000	0	0	0	0	0	0	34	2936300	Tb927.10.2900;Tb11.v5.0837	Tb927.10.2900_importin beta-1 subunit, putative | location=Tb927_10_v5.1:748683-751283(+) | length=866 | sequence_SO=chromosome | SO=protein_coding;Tb11.v5.0837 | organism=Trypanosoma_brucei_TREU927 | product
Tb11.v5.0399	same as Tb927.10.9650 Nucleoporin NUP152	Nuclear.transport	0	0	0.476	-0.6342	1.56	-2.3229	0	0	1	20	1	0	0	0	0	0	0	0	0	87589	0	0	0	0	0	0	0	0	4291800	0	0	0	0	0	0	0	0	49	87589	Tb11.v5.0399	Tb11.v5.0399_hypothetical protein, conserved | location=Tb927_11_bin_v5.1:1435595-1438963(-) | length=1122 | sequence_SO=random_sequence | SO=protein_coding
Tb927.8.3820	hypothetical protein, conserved, kinetoplastid-specific	ZUnknown	0	0	0.209	0.3118	1.56	-2.1716	0	0	1	2	0	1	1	0	0	0	0	0	0	0	227310	392510	0	0	0	0	0	0	0	0	2355100	0	0	0	0	0	0	6	619820	Tb927.8.3820	Tb927.8.3820_hypothetical protein, conserved | location=Tb927_08_v5.1:1135387-1136406(-) | length=339 | sequence_SO=chromosome | SO=protein_coding
Tb927.11.4820	60S ribosomal protein L17	Ribosome	0	0	0.619	-1.9661	1.55	-2.2666	0	0	2	5	0	0	0	0	0	0	0	0	5	0	0	0	0	0	0	0	0	3291600	0	0	0	0	0	0	0	0	19750000	6	3291600	Tb927.11.4820;Tb927.10.14580	Tb927.11.4820_60S ribosomal protein L17, putative | location=Tb927_11_v5.1:1386998-1387498(+) | length=166 | sequence_SO=chromosome | SO=protein_coding;Tb927.10.14580 | organism=Trypanosoma_brucei_TREU927 | p
Tb927.8.6580	SDH1 succinate dehydrogenase (complex II) subunit, flavoprotein	Mito.e.transport	0	0	0.513	-0.7188	1.54	-2.1621	0	0	1	1	0	0	0	0	0	0	0	0	1	0	0	0	0	0	0	0	0	35768	0	0	0	0	0	0	0	0	1144600	32	35768	Tb927.8.6580	Tb927.8.6580_succinate dehydrogenase flavoprotein, putative | location=Tb927_08_v5.1:1901186-1903061(-) | length=609 | sequence_SO=chromosome | SO=protein_coding
Tb927.11.13250	eIF-2-gamma	Translation	0	0	0.206	-0.483	1.54	-2.2989	1	0	1	3	3	1	0	0	0	1	0	0	0	450440	0	0	0	0	87431	0	0	0	9008700	0	0	0	0	0	0	0	0	20	537870	Tb927.11.13250	Tb927.11.13250_eukaryotic translation initiation factor 2 gamma, putative (eIF-2-gamma) | location=Tb927_11_v5.1:3552393-3553826(-) | length=477 | sequence_SO=chromosome | SO=protein_coding
Tb927.3.960	protein transport protein Sec61 gamma subunit, putative	Vesicular.transport	0	0	1.02	-0.8755	1.54	-4.3293	1	0	1	1	0	0	0	1	0	0	0	0	0	0	0	0	2251900	0	0	0	0	0	0	0	0	6755800	0	0	0	0	0	3	2251900	Tb927.3.960	Tb927.3.960_protein transport protein Sec61 gamma subunit, putative | location=Tb927_03_v5.1:237829-238038(+) | length=69 | sequence_SO=chromosome | SO=protein_coding
Tb927.6.4000	small glutamine-rich tetratricopeptide repeat protein, putative (SGT)	ZUnknown	0	0	3.23	-4.3865	1.54	-2.7546	2	1	1	6	1	1	1	0	0	2	5	3	5	32275	169240	140360	0	0	52551	479100	248110	510400	0	0	0	0	0	0	11843000	7882300	11215000	25	1632000	Tb927.6.4000	Tb927.6.4000_small glutamine-rich tetratricopeptide repeat protein, putative (SGT) | location=Tb927_06_v5.1:1172982-1174232(-) | length=416 | sequence_SO=chromosome | SO=protein_coding
Tb927.4.750	50S ribosomal protein L7Ae, putative	Mito.translation	1	2	2.49	3.3081	1.53	2.1698	0	1	1	3	2	2	1	0	0	0	1	1	0	3077600	3113200	1366600	0	0	0	508240	136230	0	14626000	15020000	8141700	0	0	0	0	0	0	5	8201900	Tb927.4.750	Tb927.4.750_50S ribosomal protein L7Ae, putative | location=Tb927_04_v5.1:207302-207739(-) | length=145 | sequence_SO=chromosome | SO=protein_coding
Tb927.3.3450	ARL3A	Cytoskeleton	0	0	0.238	-0.2931	1.51	-1.3987	4	2	1	6	4	2	5	1	2	4	3	3	3	2319700	625490	2329500	86349	305560	1366500	749530	641160	1338200	19955000	11108000	20330000	0	5775100	13005000	9293200	9227600	17739000	11	9762000	Tb927.3.3450	Tb927.3.3450_ADP-ribosylation factor-like protein 3A, putative | location=Tb927_03_v5.1:979573-980109(+) | length=178 | sequence_SO=chromosome | SO=protein_coding
Tb927.7.5180	60S ribosomal protein L23a or L25	Ribosome	0	0	0.562	-2.013	1.51	-4.2235	1	0	2	8	0	1	2	1	1	1	2	0	7	0	2981400	994130	1319300	1641200	2361900	616650	0	6951200	0	0	8141500	0	0	0	5581000	0	37649000	6	16866000	Tb927.7.5180;Tb927.7.5170	Tb927.7.5180_60S ribosomal protein L23a, putative | location=Tb927_07_v5.1:1364071-1364565(+) | length=164 | sequence_SO=chromosome | SO=protein_coding;Tb927.7.5170 | organism=Trypanosoma_brucei_TREU927 | pro
Tb927.3.720	ZFP3	RNA.binding	0	0	0.00265	0.0075	1.51	-2.6762	0	0	1	1	0	1	0	0	0	0	0	0	0	0	623190	0	0	0	0	0	0	0	0	3739200	0	0	0	0	0	0	0	6	623190	Tb927.3.720	Tb927.3.720_zinc finger protein 2, putative (ZFP3) | location=Tb927_03_v5.1:176646-177038(-) | length=130 | sequence_SO=chromosome | SO=protein_coding
Tb927.9.2470	nucleolar protein (NOP86)	rRNA.tRNA.process	0	0	0.101	-0.2221	1.51	-2.5178	0	0	2	2	2	2	0	0	0	0	0	0	0	113580	95596	0	0	0	0	0	0	0	4615400	3751600	0	0	0	0	0	0	0	40	209170	Tb927.9.2470;Tb927.9.2490	Tb927.9.2470_nucleolar protein (NOP86) | location=Tb927_09_v5.1:528136-530424(-) | length=760 | sequence_SO=chromosome | SO=protein_coding;Tb927.9.2490_nucleola
Tb927.4.760	adaptin complex AP1 gamma subunit	Vesicular.transport	0	0	0.0471	0.1283	1.51	-2.3685	0	0	1	2	2	0	2	0	0	0	0	0	0	62857	0	52970	0	0	0	0	0	0	2506700	0	2126300	0	0	0	0	0	0	40	115830	Tb927.4.760	Tb927.4.760_gamma-adaptin 1, putative,AP-1 adapter complex gamma subunit, putative | location=Tb927_04_v5.1:208118-210523(-) | length=801 | sequence_SO=chromosome | SO=protein_coding
Tb927.9.9630	TPR repeat/Tetratricopeptide repeat, putative	ZUnknown	0	0	0.204	-0.2833	1.51	-4.3864	3	0	1	3	0	0	0	3	1	0	0	0	0	0	0	0	1451500	204950	0	0	0	0	0	0	0	24676000	0	0	0	0	0	17	1656500	Tb927.9.9630	Tb927.9.9630_hypothetical protein, conserved | location=Tb927_09_v5.1:1532826-1533893(-) | length=355 | sequence_SO=chromosome | SO=protein_coding
Tb927.10.3200	U2 splicing auxiliary factor, putative (U2AF35)	RNA.processing	0	0	0.116	0.1713	1.5	-2.0027	0	0	1	1	0	1	1	0	0	0	0	0	0	0	239840	206010	0	0	0	0	0	0	0	0	2266100	0	0	0	0	0	0	11	445850	Tb927.10.3200	Tb927.10.3200_U2 splicing auxiliary factor, putative (U2AF35) | location=Tb927_10_v5.1:829453-830196(+) | length=247 | sequence_SO=chromosome | SO=protein_coding
Tb927.9.5150	SNU13 homologue. mRNA splciing and ribosome biogenesis	RNA.processing	1	2	1.93	2.225	1.5	2.4371	0	2	1	2	2	2	2	0	0	0	2	1	0	3019500	2924600	3571600	0	0	0	418700	664910	0	21180000	19399000	19037000	0	0	0	3797400	10783000	0	7	10599000	Tb927.9.5150	Tb927.9.5150_ribosomal protein S6, putative,NHP2/RS6-like protein (NHP2) | location=Tb927_09_v5.1:912912-913292(+) | length=126 | sequence_SO=chromosome | SO=protein_coding
Tb927.10.15180	nucleosome assembly protein, putative	ZUnknown	0	0	0.429	-0.6695	1.5	-2.4958	0	1	1	1	1	1	1	0	0	0	0	0	0	173280	125370	0	0	0	0	0	0	0	0	1755200	0	0	0	0	0	0	0	14	298650	Tb927.10.15180	Tb927.10.15180_nucleosome assembly protein, putative | location=Tb927_10_v5.1:3702340-3703440(+) | length=366 | sequence_SO=chromosome | SO=protein_coding
Tb927.10.8190	Tric complex theta subunit (TCP-1-theta)	Chaperone	0	0	0.676	-1.2585	1.49	-2.2261	1	1	1	6	6	1	1	0	0	1	1	1	3	536290	104720	126910	0	0	80105	73589	103410	210000	12871000	0	0	0	0	0	0	0	9517500	30	1235000	Tb927.10.8190	Tb927.10.8190_T-complex protein 1, theta subunit, putative,CCT-theta, putative (TCP-1-theta) | location=Tb927_10_v5.1:2036388-2038001(-) | length=537 | sequence_SO=chromosome | SO=protein_coding
Tb927.11.14020	RNA-binding protein (NRBD2)	Ribosome	0	2	0.739	-2.0895	1.49	3.589	0	2	2	13	2	11	8	0	0	0	11	6	10	373730	13086000	13774000	0	0	0	11724000	2962200	14582000	5540400	168990000	185080000	0	0	0	145680000	42406000	186840000	13	56502000	Tb927.11.14020;Tb927.11.14000	Tb927.11.14020_RNA-binding protein (NRBD2) | location=Tb927_11_v5.1:3711538-3712377(+) | length=279 | sequence_SO=chromosome | SO=protein_coding;Tb927.11.14000_
Tb927.11.14250	Tric complex epsilon subunit (TCP-1-epsilon)	Chaperone	0	0	0.255	-0.6092	1.48	-2.5502	1	1	1	3	2	1	3	0	0	1	1	1	1	255980	105140	243250	0	0	78398	43585	69298	114310	8284200	0	7191800	0	0	0	0	0	0	31	909960	Tb927.11.14250	Tb927.11.14250_T-complex protein 1, epsilon subunit, putative (TCP-1-epsilon) | location=Tb927_11_v5.1:3793465-3795081(+) | length=538 | sequence_SO=chromosome | SO=protein_coding
Tb927.5.2940	stress-induced protein sti1, putative	Chaperone	0	0	0.0124	0.0336	1.48	-2.4504	1	1	1	5	5	1	2	0	0	1	0	0	0	380510	0	125090	0	0	40958	0	0	0	10088000	0	6596800	0	0	0	0	0	0	33	546560	Tb927.5.2940	Tb927.5.2940_stress-induced protein sti1, putative | location=Tb927_05_v5.1:984246-985898(+) | length=550 | sequence_SO=chromosome | SO=protein_coding
Tb927.10.170	pseudouridine synthase, Cbf5p	rRNA.tRNA.process	0	2	0.0689	-0.0683	1.48	1.9389	0	3	1	14	6	12	3	0	0	0	4	6	4	1450800	2353900	617100	0	0	0	649450	981290	421240	34230000	48354000	16726000	0	0	0	19579000	24165000	12316000	24	6473800	Tb927.10.170	Tb927.10.170_pseudouridine synthase, Cbf5p | location=Tb927_10_v5.1:70843-72126(+) | length=427 | sequence_SO=chromosome | SO=protein_coding
Tb927.6.4920	S-adenosylmethionine synthetase, putative (METK1)	Enzyme	0	0	1.02	-1.4537	1.46	-1.98	0	0	9	4	2	0	1	0	0	0	1	0	3	353140	0	0	0	0	0	79151	0	232960	0	0	0	0	0	0	0	0	5125100	22	665250	Tb927.6.4920;Tb927.6.4910;Tb927.6.4900;Tb927.6.4890;Tb927.6.4880;Tb927.6.4870;Tb927.6.4860;Tb927.6.4850;Tb927.6.4840	Tb927.6.4920_S-adenosylmethionine synthetase, putative (METK1) | location=Tb927_06_v5.1:1361435-1362628(+) | length=397 | sequence_SO=chromosome | SO=protein_coding;Tb927.6.4910 | organism=Trypanosoma_brucei_
Tb927.11.670	epsinR	Cytoskeleton	0	0	3.41	-6.3624	1.45	-2.395	0	0	2	11	3	0	1	0	0	0	9	2	9	183460	0	81057	0	0	0	7337900	419130	8142800	2042700	0	0	0	0	0	97428000	3469200	122230000	14	16164000	Tb927.11.670;Tb11.0890	Tb927.11.670_epsinR | location=Tb927_11_v5.1:163804-165321(-) | length=505 | sequence_SO=chromosome | SO=protein_coding;Tb11.0890_epsin, putative,chrXI addition
Tb927.10.9660	CRN/SYF3 part of splicing PRP19 complex, putative	RNA.processing	0	0	1.4	-2.3283	1.45	-2.2915	0	1	2	10	1	4	1	0	0	0	4	8	0	55580	213040	29514	0	0	0	261200	447720	0	0	10145000	0	0	0	0	12309000	12581000	0	38	1007000	Tb927.10.9660;Tb11.v5.0735	Tb927.10.9660_hypothetical protein, conserved | location=Tb927_10_v5.1:2382374-2384704(+) | length=776 | sequence_SO=chromosome | SO=protein_coding;Tb11.v5.0735 | organism=Trypanosoma_brucei_TREU927 | product
Tb927.11.10260	hypothetical protein, conserved, no known domains	ZUnknown	1	0	4.19	3.3852	1.45	-2.1418	9	2	1	10	7	4	2	0	4	9	1	1	0	1597000	656460	282800	0	450360	2187900	41418	45989	0	32126000	19191000	10361000	0	8989800	32824000	0	0	0	20	5262000	Tb927.11.10260	Tb927.11.10260_hypothetical protein, conserved | location=Tb927_11_v5.1:2740794-2742218(+) | length=474 | sequence_SO=chromosome | SO=protein_coding
Tb927.9.3640	LSU ribosomal protein, mitochondrial, putative	Mito.translation	0	0	0.575	0.764	1.44	-1.8951	0	1	1	1	1	1	1	0	0	0	0	0	0	371910	146560	329760	0	0	0	0	0	0	0	0	2967800	0	0	0	0	0	0	9	848230	Tb927.9.3640	Tb927.9.3640_hypothetical protein, conserved | location=Tb927_09_v5.1:729422-730018(+) | length=198 | sequence_SO=chromosome | SO=protein_coding
Tb927.10.11230	conserved, found in PRP19 pull-down	RNA.processing	0	0	0.195	-0.3462	1.43	-2.0894	0	1	1	1	1	1	1	0	0	0	0	1	0	293390	293330	221610	0	0	0	0	171610	0	0	0	0	0	0	0	0	2574100	0	15	979930	Tb927.10.11230	Tb927.10.11230_hypothetical protein, conserved | location=Tb927_10_v5.1:2746454-2747425(-) | length=323 | sequence_SO=chromosome | SO=protein_coding
Tb927.11.2430	dynein heavy chain DHC1b or DYNC2H2, cytoplasmic type	Cytoskeleton	0	0	0.0927	-0.2148	1.41	-2.6793	1	1	1	2	1	1	1	0	1	1	1	2	0	0	0	0	0	0	0	0	0	0	0	0	0	0	0	0	0	0	0	244	0	Tb927.11.2430	Tb927.11.2430_Cytoplasmic dynein 2 heavy chain (DYNC2H1), putative,Cytoplasmic dynein 2 heavy chain (DYNC2H2), putative (DHC1b) | location=Tb927_11_v5.1:705448-718371(-) | length=4307 | sequence_SO=chromosome
Tb927.7.1110	asparagine synthetase a, putative	Amino.acids	0	0	0.0562	-0.1761	1.4	-2.1495	1	0	1	5	5	1	0	0	0	1	0	0	2	805600	74447	0	0	0	99039	0	0	253740	13327000	0	0	0	0	0	0	0	6800400	19	1232800	Tb927.7.1110	Tb927.7.1110_asparagine synthetase a, putative | location=Tb927_07_v5.1:288012-289067(+) | length=351 | sequence_SO=chromosome | SO=protein_coding
Tb927.8.2740	mitochondrial RNA binding protein (TbRBP38)	Mito.RNA	0	0	0.0212	-0.0529	1.4	-2.0255	0	0	1	1	1	0	0	0	0	0	0	0	1	49324	0	0	0	0	0	0	0	47200	0	0	0	0	0	0	0	0	707990	15	96524	Tb927.8.2740	Tb927.8.2740_mitochondrial RNA binding protein (TbRBP38) | location=Tb927_08_v5.1:810007-811569(+) | length=338 | sequence_SO=chromosome | SO=protein_coding
Tb927.9.10250	small nuclear ribonucleoprotein Sm-F	RNA.processing	0	0	0.448	-0.9527	1.4	-2.1421	0	0	1	1	0	1	0	0	0	0	0	1	0	0	648130	0	0	0	0	0	563450	0	0	0	0	0	0	0	0	2253800	0	4	1211600	Tb927.9.10250	Tb927.9.10250_small nuclear ribonucleoprotein Sm-F (Sm-F) | location=Tb927_09_v5.1:1610208-1610969(-) | length=75 | sequence_SO=chromosome | SO=protein_coding
Tb927.10.5790	hypothetical protein, conserved	Mito.pathway	0	0	0.689	-0.587	1.39	-1.8593	9	3	1	10	6	4	3	0	2	9	3	6	3	905130	390590	465830	0	149290	1496600	220830	818550	347210	23761000	15337000	16912000	0	6735000	33469000	8759500	21277000	12777000	29	4794000	Tb927.10.5790	Tb927.10.5790_hypothetical protein, conserved | location=Tb927_10_v5.1:1436891-1438501(-) | length=536 | sequence_SO=chromosome | SO=protein_coding
Tb927.9.8880	actin A	Cytoskeleton	0	0	3.99	-1.528	1.38	-1.3728	26	21	2	30	22	21	23	7	17	26	25	25	28	42269000	25509000	44840000	1158200	9214900	52631000	60726000	54929000	60671000	898670000	540680000	951450000	26915000	220970000	1102200000	1266900000	1092900000	1213100000	21	351950000	Tb927.9.8880;Tb927.9.8850	Tb927.9.8880_actin A | location=Tb927_09_v5.1:1426858-1428918(-) | length=376 | sequence_SO=chromosome | SO=protein_coding;Tb927.9.8850_actin A | location=Tb927
Tb927.10.8980	hypothetical protein, conserved	Mito.pathway	1	2	3.47	3.9434	1.38	2.1639	0	2	1	4	3	4	2	0	0	0	0	0	0	2263200	5352400	760210	0	0	0	0	0	0	14834000	33884000	9912700	0	0	0	0	0	0	7	8375900	Tb927.10.8980	Tb927.10.8980_hypothetical protein, conserved | location=Tb927_10_v5.1:2227157-2227666(+) | length=169 | sequence_SO=chromosome | SO=protein_coding
Tb927.10.3210	delta-1-pyrroline-5-carboxylate dehydrogenase, putative	Mito.pathway	0	0	0.455	0.6368	1.37	-1.7215	0	0	1	3	2	0	2	0	0	0	0	0	0	208130	0	299050	0	0	0	0	0	0	7284400	0	0	0	0	0	0	0	0	35	507180	Tb927.10.3210	Tb927.10.3210_delta-1-pyrroline-5-carboxylate dehydrogenase, putative | location=Tb927_10_v5.1:831505-833190(+) | length=561 | sequence_SO=chromosome | SO=protein_coding
Tb927.9.2590	hypothetical protein, conserved	ZUnknown	0	0	0.0346	-0.1088	1.37	-3.0143	1	0	1	5	3	0	4	1	0	0	0	0	0	161780	0	157580	54854	0	0	0	0	0	7663500	0	8623700	0	0	0	0	0	0	51	374210	Tb927.9.2590	Tb927.9.2590_hypothetical protein, conserved | location=Tb927_09_v5.1:572109-575375(-) | length=1088 | sequence_SO=chromosome | SO=protein_coding
Tb927.11.3730	leucyl-tRNA synthetase, putative (LeuRS)	Translation.tRNA	0	0	0.0398	0.1015	1.32	-2.1018	0	0	1	3	3	0	1	0	0	0	0	0	0	127360	0	17136	0	0	0	0	0	0	7641600	0	0	0	0	0	0	0	0	60	144500	Tb927.11.3730	Tb927.11.3730_leucyl-tRNA synthetase, putative (LeuRS) | location=Tb927_11_v5.1:1098860-1102084(+) | length=1074 | sequence_SO=chromosome | SO=protein_coding
Tb927.9.10230	ACDP23 HSP20 domain (p23-like)	Chaperone	0	0	0.139	-0.3985	1.31	-2.2617	0	0	1	3	2	0	0	0	0	0	0	0	1	746400	0	0	0	0	0	0	0	379510	6717600	0	0	0	0	0	0	0	0	9	1125900	Tb927.9.10230	Tb927.9.10230_hypothetical protein, conserved | location=Tb927_09_v5.1:1608745-1609251(-) | length=168 | sequence_SO=chromosome | SO=protein_coding
Tb927.4.2000	ruvB-like DNA helicase, putative,ATP-dependent DNA helicase, putative	DNA	0	0	0.141	-0.3074	1.31	-2.1056	0	0	1	3	2	0	2	0	0	0	0	0	0	95720	0	113400	0	0	0	0	0	0	0	0	3288600	0	0	0	0	0	0	29	209120	Tb927.4.2000	Tb927.4.2000_ruvB-like DNA helicase, putative,ATP-dependent DNA helicase, putative | location=Tb927_04_v5.1:505366-506790(-) | length=474 | sequence_SO=chromosome | SO=protein_coding
Tb927.11.10750	Pre-mRNA-splicing factor CWC22, putative	RNA.processing	0	2	2.32	-3.1968	1.31	2.0657	0	4	1	11	6	6	4	0	0	0	8	10	2	661500	688690	304730	0	0	0	10665000	5622700	5640700	110310000	106800000	75876000	0	0	0	115530000	147430000	104400000	28	23583000	Tb927.11.10750	Tb927.11.10750_Pre-mRNA-splicing factor CWC22, putative (TbCWC22) | location=Tb927_11_v5.1:2877630-2879375(+) | length=581 | sequence_SO=chromosome | SO=protein_coding
Tb927.6.1410	hypothetical protein, conserved	Mito.pathway	0	0	0.841	-1.4074	1.3	-2.4078	0	0	1	1	0	0	0	0	0	0	1	0	1	0	0	0	0	0	0	68574	0	211130	0	0	0	0	0	0	0	0	3589100	17	279700	Tb927.6.1410	Tb927.6.1410_hypothetical protein, conserved | location=Tb927_06_v5.1:507032-507721(-) | length=229 | sequence_SO=chromosome | SO=protein_coding
Tb927.8.1990	mitochondrial peroxiredoxin (TRYP2)	Redox	0	0	0.0572	-0.204	1.3	-2.8215	2	1	1	3	2	1	3	0	0	2	0	1	2	363000	142460	1258300	0	0	442790	0	68697	291790	0	0	8916600	0	0	10229000	0	0	6761300	13	2567000	Tb927.8.1990	Tb927.8.1990_peroxidoxin (TRYP2) | location=Tb927_08_v5.1:634173-634853(+) | length=226 | sequence_SO=chromosome | SO=protein_coding
Tb927.2.820	retrotransposon hot spot protein (RHS1, pseudogene), putative	RHS	0	0	0.132	-0.3114	1.3	-1.9446	0	0	4	7	0	5	1	0	0	0	1	0	1	0	275470	37221	0	0	0	50569	0	24432	0	9090600	0	0	0	0	0	0	0	33	387700	Tb927.2.820;Tb11.v5.0670;Tb927.10.70;Tb11.v5.0532	Tb927.2.820_retrotransposon hot spot protein (RHS, pseudogene), putative,retrotransposon hot spot protein 1 (RHS1), interrupted | location=Tb927_02_v5.1:140725-142308(-) | length=527 | sequence_SO=chromosome
Tb927.9.13740	ADP-ribosylation factor, putative	Vesicular.transport	0	0	0.447	-0.635	1.3	-1.7154	5	3	4	8	6	3	4	0	4	5	4	4	5	2722600	444120	1792100	0	648070	1696700	1048400	644470	1774900	17422000	6926000	16237000	0	6195600	11313000	9673300	5874300	14761000	10	10771000	Tb927.9.13740;Tb927.9.13710;Tb927.9.13680;Tb927.9.13650	Tb927.9.13740_ADP-ribosylation factor, putative | location=Tb927_09_v5.1:2174469-2175017(-) | length=182 | sequence_SO=chromosome | SO=protein_coding;Tb927.9.13710 | organism=Trypanosoma_brucei_TREU927 | prod
Tb927.8.6110	3-hydroxy-3-methylglutaryl-CoA synthase, putative (HMGS)	Mito.pathway	0	0	4.84	-2.7274	1.28	-2.0745	13	7	1	21	8	7	10	1	10	13	14	18	13	2108100	1405300	3068100	47674	1820700	6620200	8269000	11498000	7009200	79618000	57267000	102310000	0	50185000	189000000	216120000	272200000	191950000	28	41846000	Tb927.8.6110	Tb927.8.6110_hypothetical protein, conserved | location=Tb927_08_v5.1:1785314-1786813(+) | length=499 | sequence_SO=chromosome | SO=protein_coding
Tb927.3.5340	Hsc70-interacting protein (Hip), putative	Chaperone	0	0	0.338	-0.8581	1.27	-2.2586	0	0	1	2	0	0	1	0	0	0	0	0	2	0	0	129540	0	0	0	0	0	344430	0	0	0	0	0	0	0	0	5855400	17	473980	Tb927.3.5340	Tb927.3.5340_Hsc70-interacting protein (Hip), putative | location=Tb927_03_v5.1:1499136-1500290(+) | length=384 | sequence_SO=chromosome | SO=protein_coding
Tb927.10.9800	60S ribosomal protein L22	Ribosome	0	0	0.532	-1.1198	1.26	-2.288	0	0	2	2	0	0	1	0	0	0	1	0	0	0	0	722810	0	0	0	660610	0	0	0	0	2168400	0	0	0	0	0	0	3	1383400	Tb927.10.9800;Tb927.11.10160	Tb927.10.9800_60S ribosomal protein L22 | location=Tb927_10_v5.1:2426896-2427288(+) | length=130 | sequence_SO=chromosome | SO=protein_coding;Tb927.11.10160_60S
Tb927.11.8760	hypothetical protein, conserved	ZUnknown	0	0	0.974	-2.3168	1.26	-3.2339	1	0	1	1	1	1	0	1	0	1	1	0	1	754070	708440	0	688410	0	655370	515190	0	951260	0	0	0	0	0	0	0	0	28538000	30	4272700	Tb927.11.8760	Tb927.11.8760_hypothetical protein, conserved | location=Tb927_11_v5.1:2408621-2410204(+) | length=527 | sequence_SO=chromosome | SO=protein_coding
Tb927.5.4260	histone H4	Chromatin	0	2	0.155	0.3561	1.25	2.3671	0	3	11	4	3	3	3	0	0	0	2	2	1	2368300	6285400	2362100	0	0	0	2097600	1415200	894380	11947000	20872000	7537900	0	0	0	10015000	7742500	0	4	15423000	Tb927.5.4260;Tb927.5.4250;Tb927.5.4240;Tb927.5.4230;Tb927.5.4220;Tb927.5.4210;Tb927.5.4200;Tb927.5.4190;Tb927.5.4180;Tb927.5.4170;Tb927.2.2670	Tb927.5.4260_histone H4, putative | location=Tb927_05_v5.1:1334564-1334866(-) | length=100 | sequence_SO=chromosome | SO=protein_coding;Tb927.5.4250_histone H4,
Tb927.9.4230	fatty acyl CoA synthetase 4 (ACS4)	Lipids	0	0	0.301	-0.6571	1.25	-2.2885	0	0	4	3	3	0	0	0	0	0	1	0	0	195280	0	0	0	0	0	0	0	0	6053700	0	0	0	0	0	0	0	0	31	195280	Tb927.9.4230;Tb927.9.4210;Tb11.v5.0561;Tb927.9.4200	Tb927.9.4230_fatty acyl CoA synthetase 4 (ACS4) | location=Tb927_09_v5.1:800986-803527(+) | length=702 | sequence_SO=chromosome | SO=protein_coding;Tb927.9.4210 | organism=Trypanosoma_brucei_TREU927 | product
Tb927.9.5730	nucleosome assembly protein-like protein	Chromatin	0	0	0.00704	-0.0179	1.24	-2.0171	0	0	1	1	0	1	0	0	0	0	0	0	0	0	191820	0	0	0	0	0	0	0	0	3644500	0	0	0	0	0	0	0	19	191820	Tb927.9.5730	Tb927.9.5730_nucleosome assembly protein-like protein | location=Tb927_09_v5.1:985400-986668(+) | length=422 | sequence_SO=chromosome | SO=protein_coding
Tb927.2.470	retrotransposon hot spot protein 4 (RHS4), putative	RHS	0	0	0.904	1.5365	1.24	-1.9391	1	1	10	11	6	2	1	0	0	1	0	0	0	372280	162790	70681	0	0	57622	0	0	0	14440000	11243000	0	0	0	0	0	0	0	48	663370	Tb927.2.470;Tb927.2.340;Tb927.4.220;Tb927.2.1120;Tb11.v5.0800;Tb11.v5.0495;Tb11.v5.0295;Tb927.1.410;Tb927.2.1100;Tb11.0820	Tb927.2.470_retrotransposon hot spot protein 4 (RHS4), putative | location=Tb927_02_v5.1:86881-89463(-) | length=860 | sequence_SO=chromosome | SO=protein_coding;Tb927.2.340 | organism=Trypanosoma_brucei_TREU
Tb927.10.5770	CDC48 homologue, implicated in ERAD and ribosome quality control	Ubiquitin.proteasome	0	0	0.387	-0.661	1.24	-1.7189	2	3	1	5	4	3	5	1	0	2	3	2	3	282690	108020	297870	19881	0	93322	82457	52372	215550	8822600	5352200	9621200	0	0	8021900	3739200	4442100	6424200	41	1152200	Tb927.10.5770	Tb927.10.5770_valosin-containing protein homolog,Transitional endoplasmic reticulum ATPase, putative (VCP) | location=Tb927_10_v5.1:1431106-1433448(-) | length=780 | sequence_SO=chromosome | SO=protein_coding
Tb927.10.8940	Flagellum tageting protein KHARON1	Cytoskeleton	0	0	0.436	0.4879	1.23	0.9189	2	7	1	11	9	7	7	0	0	2	4	3	9	1926700	1058000	1350300	0	0	180790	355720	189360	1177300	35920000	19317000	23643000	0	0	7491100	10315000	6771400	21303000	20	6238000	Tb927.10.8940	Tb927.10.8940_hypothetical protein, conserved | location=Tb927_10_v5.1:2219490-2220725(+) | length=411 | sequence_SO=chromosome | SO=protein_coding
Tb927.7.7040	methylthioadenosine phosphorylase, putative (MTAP)	Amino.acids	0	0	0.0265	-0.0794	1.22	-2.5697	0	0	1	1	0	0	1	0	0	0	0	0	0	0	0	347730	0	0	0	0	0	0	0	0	4520400	0	0	0	0	0	0	13	347730	Tb927.7.7040	Tb927.7.7040_methylthioadenosine phosphorylase, putative (MTAP) | location=Tb927_07_v5.1:2012048-2012977(-) | length=309 | sequence_SO=chromosome | SO=protein_coding
Tb927.10.5030	40S ribosomal protein S27+ ubiquitin	Ribosome	0	0	0.755	-2.276	1.22	-2.545	0	0	2	3	0	0	1	0	0	0	0	0	3	0	0	756170	0	0	0	0	0	2367800	0	0	0	0	0	0	0	0	14207000	6	3123900	Tb927.10.5030;Tb927.7.3680	Tb927.10.5030_ubiquitin/ribosomal protein S27a, putative | location=Tb927_10_v5.1:1246866-1247321(+) | length=151 | sequence_SO=chromosome | SO=protein_coding;Tb927.7.3680 | organism=Trypanosoma_brucei_TREU92
Tb927.11.4210	U-box domain containing protein, putative	ZUnknown	0	0	0.134	0.4203	1.21	-3.2097	9	1	1	11	6	2	1	0	6	9	1	2	2	1668100	413970	173300	0	1079600	2864500	69338	104300	144790	49495000	19376000	0	0	19519000	33826000	0	13295000	15092000	24	6517800	Tb927.11.4210	Tb927.11.4210_hypothetical protein, conserved | location=Tb927_11_v5.1:1233113-1235005(-) | length=630 | sequence_SO=chromosome | SO=protein_coding
Tb927.7.4500	PX domain containing protein, putative	ZUnknown	0	0	0.702	-1.0657	1.21	-1.9989	4	2	2	4	2	2	2	0	0	4	2	1	3	446690	130180	207730	0	0	425750	121200	109560	342610	12410000	4825900	8713600	0	0	7341100	3271000	4667100	6931200	27	1783700	Tb927.7.4500;Tb11.v5.0263	Tb927.7.4500_hypothetical protein, conserved | location=Tb927_07_v5.1:1198019-1199605(-) | length=528 | sequence_SO=chromosome | SO=protein_coding;Tb11.v5.0263_
Tb927.7.2940	histone H2A	Chromatin	0	2	0.241	0.7988	1.2	2.582	0	1	13	3	2	3	1	0	0	0	1	3	1	5155700	13709000	2315300	0	0	0	1630500	3364400	1108200	35092000	78483000	0	0	0	0	0	19797000	0	6	27283000	Tb927.7.2940;Tb927.7.2930;Tb927.7.2920;Tb927.7.2910;Tb927.7.2900;Tb927.7.2890;Tb927.7.2880;Tb927.7.2870;Tb927.7.2860;Tb927.7.2850;Tb927.7.2840;Tb927.7.2830;Tb927.7.2820	Tb927.7.2940_histone H2A, putative | location=Tb927_07_v5.1:739886-740297(+) | length=134 | sequence_SO=chromosome | SO=protein_coding;Tb927.7.2930_histone H2A,
Tb927.7.2340	40S ribosomal protein S15	Ribosome	0	0	0.468	-1.7343	1.2	-1.8846	0	0	2	5	0	0	0	0	0	0	0	0	5	0	0	0	0	0	0	0	0	7108600	0	0	0	0	0	0	0	0	42652000	6	7108600	Tb927.7.2340;Tb927.7.2370	Tb927.7.2340_40S ribosomal protein S15, putative | location=Tb927_07_v5.1:604000-604458(-) | length=152 | sequence_SO=chromosome | SO=protein_coding;Tb927.7.2370 | organism=Trypanosoma_brucei_TREU927 | produc
Tb927.9.6070	40S ribosomal protein S3	Ribosome	0	2	1.17	-2.0596	1.2	1.5883	0	3	2	13	3	5	4	0	0	0	4	3	12	1218300	2246500	2289000	0	0	0	3513700	867080	23430000	18180000	30690000	28858000	0	0	0	44024000	12541000	247540000	12	33564000	Tb927.9.6070;Tb927.10.11540	Tb927.9.6070_40S ribosomal protein S3, putative (RPS3) | location=Tb927_09_v5.1:1008372-1009016(+) | length=214 | sequence_SO=chromosome | SO=protein_coding;Tb927.10.11540 | organism=Trypanosoma_brucei_TREU92
Tb927.9.15090	cytosolic coat protein, putative	Vesicular.transport	1	0	3.73	-4.7725	1.2	-1.8712	0	1	1	9	1	2	1	0	0	0	8	5	2	193940	295050	92646	0	0	0	4113800	1191200	476970	0	5602800	0	0	0	0	41880000	18072000	9532200	13	6363600	Tb927.9.15090	Tb927.9.15090_cytosolic coat protein, putative | location=Tb927_09_v5.1:2356154-2356813(+) | length=219 | sequence_SO=chromosome | SO=protein_coding
Tb927.8.3060	cytosolic leucyl aminopeptidase, putative,metallo-peptidase, Clan MF, Family M17	Protease	0	0	0.306	-0.645	1.19	-1.9515	0	0	1	2	0	2	0	0	0	0	1	0	0	0	226110	0	0	0	0	22542	0	0	0	7913900	0	0	0	0	0	0	0	35	248650	Tb927.8.3060	Tb927.8.3060_cytosolic leucyl aminopeptidase, putative,metallo-peptidase, Clan MF, Family M17 | location=Tb927_08_v5.1:919954-921969(+) | length=671 | sequence_SO=chromosome | SO=protein_coding
Tb927.11.11610	Found in PRP19 pull-down	RNA.processing	0	0	2.02	-2.2791	1.18	-2.1324	0	0	1	4	0	1	2	0	0	0	2	4	0	0	107970	172960	0	0	0	112240	327090	0	0	0	6630100	0	0	0	4536400	7814500	0	31	720260	Tb927.11.11610	Tb927.11.11610_hypothetical protein, conserved | location=Tb927_11_v5.1:3117475-3119193(+) | length=572 | sequence_SO=chromosome | SO=protein_coding
Tb927.10.13780	GSK3-short glycogen synthase kinase 3	Glycans	0	0	0.836	1.6645	1.17	-1.9697	6	1	2	9	6	2	1	0	1	6	0	2	1	1983100	501560	347360	0	92890	1549300	0	309130	191910	25432000	13357000	0	0	0	29000000	0	10387000	0	18	4975200	Tb927.10.13780;Tb11.v5.0718	Tb927.10.13780_glycogen synthase kinase 3 (GSK3) | location=Tb927_10_v5.1:3362271-3363329(-) | length=352 | sequence_SO=chromosome | SO=protein_coding;Tb11.v5.0718 | organism=Trypanosoma_brucei_TREU927 | prod
Tb927.11.15430	U5 small nuclear ribonucleoprotein U5-116K, putative	RNA.processing	0	0	0.128	-0.2458	1.17	-1.825	0	0	1	5	0	3	4	0	0	0	1	1	0	0	48734	77048	0	0	0	27354	14670	0	0	2757900	3028100	0	0	0	0	0	0	46	167810	Tb927.11.15430	Tb927.11.15430_U5 small nuclear ribonucleoprotein component, putative,U5 snrnp-specific protein, putative | location=Tb927_11_v5.1:4097329-4100253(-) | length=974 | sequence_SO=chromosome | SO=protein_coding
Tb927.4.3630	protein phosphatase 1, putative	Protein.phosphatase	0	0	2.08	-1.3843	1.16	-1.5991	6	3	3	6	3	3	3	0	0	6	2	2	2	587120	333880	696190	0	0	1264700	397670	414850	828650	9158100	6200600	12909000	0	0	17612000	9890200	10355000	19814000	19	4523100	Tb927.4.3630;Tb927.4.3640;Tb927.4.3620	Tb927.4.3630_protein phosphatase 1, putative | location=Tb927_04_v5.1:923109-923993(-) | length=294 | sequence_SO=chromosome | SO=protein_coding;Tb927.4.3640_pr
Tb927.10.3990	DHH1	RNA.degradation	0	0	1.31	-0.6703	1.16	-1.0128	6	5	1	12	7	8	5	1	4	6	7	5	6	1836100	1348800	829290	62654	280620	905520	1105700	741620	1376100	53131000	32933000	19477000	0	7956400	24465000	25692000	22163000	33201000	26	8486400	Tb927.10.3990	Tb927.10.3990_DHH1 (DHH1) | location=Tb927_10_v5.1:1055560-1056780(-) | length=406 | sequence_SO=chromosome | SO=protein_coding
Tb927.11.14750	PSP1 C-terminal conserved region, putative	ZUnknown	0	2	0.469	0.6133	1.16	-1.3454	0	1	1	4	2	1	2	0	0	0	0	0	0	356130	172660	385790	0	0	0	0	0	0	6410400	0	0	0	0	0	0	0	0	18	914590	Tb927.11.14750	Tb927.11.14750_hypothetical protein, conserved | location=Tb927_11_v5.1:3922759-3923877(-) | length=372 | sequence_SO=chromosome | SO=protein_coding
Tb11.v5.0713	retrotransposon hot spot (RHS) protein, putative	RHS	0	0	0.291	0.6214	1.15	-1.8498	4	1	1	9	6	1	3	0	1	4	0	1	1	342670	64685	246970	0	22424	181170	0	22688	39348	14052000	0	11892000	0	0	0	0	0	0	44	919950	Tb11.v5.0713	Tb11.v5.0713_retrotransposon hot spot (RHS) protein, putative | location=Tb927_11_bin_v5.1:3629729-3631795(+) | length=688 | sequence_SO=random_sequence | SO=protein_coding
Tb927.6.4960	ZC3H47	RNA.binding	0	0	0.0174	0.0515	1.15	-2.0987	0	0	1	2	2	0	1	0	0	0	1	0	0	827130	0	197950	0	0	0	143500	0	0	10753000	0	0	0	0	0	0	0	0	13	1168600	Tb927.6.4960	Tb927.6.4960_zinc finger-domain protein, putative | location=Tb927_06_v5.1:1366188-1366973(+) | length=261 | sequence_SO=chromosome | SO=protein_coding
Tb927.10.14910	Sarcalumenin, putative	ZUnknown	0	0	0.764	-0.7171	1.15	-2.1649	16	3	1	18	9	8	3	0	8	16	6	6	8	2036200	1914900	527430	0	2219700	3292300	857280	796640	1892100	61024000	52383000	22066000	0	45958000	66203000	27820000	27902000	48596000	26	13537000	Tb927.10.14910	Tb927.10.14910_sarcoplasmic reticulum glycoprotein, putative,sarcalumenin precursor, putative | location=Tb927_10_v5.1:3642186-3643739(+) | length=517 | sequence_SO=chromosome | SO=protein_coding
Tb927.9.13920	kinetoplastid membrane protein KMP-11	Membrane.protein	1	0	1.86	4.29	1.12	2.7637	1	3	3	6	3	4	4	0	0	1	0	2	0	7326200	2230600	8142200	0	0	0	0	427500	0	62867000	0	45412000	0	0	0	0	0	0	7	18126000	Tb927.9.13920;Tb927.9.13880;Tb927.9.13820	Tb927.9.13920_kinetoplastid membrane protein KMP-11 (KMP-11) | location=Tb927_09_v5.1:2180778-2181056(-) | length=92 | sequence_SO=chromosome | SO=protein_coding;Tb927.9.13880 | organism=Trypanosoma_brucei_TR
Tb927.10.9970	hypothetical protein, conserved	Mito.pathway	1	2	3.72	3.277	1.12	1.8216	0	7	1	12	8	7	10	0	0	0	0	0	0	583850	542780	900000	0	0	0	0	0	0	31391000	31719000	38222000	0	0	0	0	0	0	50	2026600	Tb927.10.9970	Tb927.10.9970_hypothetical protein, conserved | location=Tb927_10_v5.1:2460038-2463112(+) | length=1024 | sequence_SO=chromosome | SO=protein_coding
Tb927.4.1100	60S ribosomal protein L21e	Ribosome	0	0	0.464	-1.4054	1.12	-2.172	0	0	3	3	0	0	0	0	0	0	0	0	3	0	0	0	0	0	0	0	0	1505300	0	0	0	0	0	0	0	0	12042000	8	1505300	Tb927.4.1100;Tb927.11.680;Tb11.0880	Tb927.4.1100_ribosomal protein L21E (60S), putative | location=Tb927_04_v5.1:292933-293412(-) | length=159 | sequence_SO=chromosome | SO=protein_coding;Tb927.11.680 | organism=Trypanosoma_brucei_TREU927 | pro
Tb927.11.1840	hypothetical protein, conserved, myosin-like	ZUnknown	0	0	0.974	-0.8861	1.12	-1.64	0	0	2	2	2	1	0	0	0	0	0	0	0	177600	49812	0	0	0	0	0	0	0	3907200	0	0	0	0	0	0	0	0	22	227410	Tb927.11.1840;Tb11.1380	Tb927.11.1840_hypothetical protein, conserved | location=Tb927_11_v5.1:546579-547778(-) | length=399 | sequence_SO=chromosome | SO=protein_coding;Tb11.1380_hypo
Tb927.3.3580	lipophosphoglycan biosynthetic protein, putative (LPG3)=GRP94 ER chaperone	Glycans	0	2	0.286	0.6316	1.11	-2.1033	0	1	1	3	3	2	1	0	0	0	0	0	1	237690	133160	72591	0	0	0	0	0	58335	8251900	5469400	0	0	0	0	0	0	0	37	501770	Tb927.3.3580	Tb927.3.3580_lipophosphoglycan biosynthetic protein, putative (LPG3) | location=Tb927_03_v5.1:1006678-1008999(+) | length=773 | sequence_SO=chromosome | SO=protein_coding
Tb927.9.5590	DNA topoisomerase ii (TOP2)	Mito.DNA	0	0	1.59	-3.5102	1.1	-1.9373	0	0	1	16	0	4	0	0	0	0	12	15	0	0	166360	0	0	0	0	833460	1310000	0	0	16086000	0	0	0	0	54053000	62676000	0	59	2309800	Tb927.9.5590	Tb927.9.5590_DNA topoisomerase ii (TOP2) | location=Tb927_09_v5.1:961067-964732(+) | length=1221 | sequence_SO=chromosome | SO=protein_coding
Tb927.10.7280	pre-mRNA splicing factor ATP-dependent RNA helicase, putative	RNA.processing	0	2	1.1	-1.7578	1.1	-1.3846	0	1	2	10	1	5	2	0	0	0	5	7	1	21320	158750	56851	0	0	0	127300	190270	17749	0	0	5809000	0	0	0	7532900	10621000	0	64	572240	Tb927.10.7280;Tb927.5.1150	Tb927.10.7280_pre-mRNA splicing factor ATP-dependent RNA helicase, putative,RNA helicase, putative | location=Tb927_10_v5.1:1833351-1836539(-) | length=1062 | sequence_SO=chromosome | SO=protein_coding
Tb927.4.4040	hypothetical protein, conserved	Cytoskeleton	0	0	0.898	-4.5176	1.05	-5.3232	1	0	1	1	1	0	1	1	1	1	1	1	1	21475000	0	25469000	14500000	19247000	21901000	23881000	16545000	32021000	0	0	0	0	0	0	0	0	416270000	13	175040000	Tb927.4.4040	Tb927.4.4040_hypothetical protein, conserved | location=Tb927_04_v5.1:1073082-1073861(-) | length=259 | sequence_SO=chromosome | SO=protein_coding
Tb927.4.4910	3,2-trans-enoyl-CoA isomerase, mitochondrial precursor, putative	Lipids	0	0	1.75	-0.9539	1.05	-1.3117	5	3	2	6	4	3	4	0	2	5	3	4	5	1397400	773160	2161100	0	170440	2532300	1377500	1878100	1054100	21516000	18316000	34226000	0	5203600	34142000	22572000	26557000	18973000	16	11344000	Tb927.4.4910;Tb927.8.7530	Tb927.4.4910_3,2-trans-enoyl-CoA isomerase, mitochondrial precursor, putative | location=Tb927_04_v5.1:1344760-1345962(-) | length=400 | sequence_SO=chromosome | SO=protein_coding
Tb927.10.10010	60S acidic ribosomal subunit	Ribosome	0	0	0.137	0.3364	1.05	-1.7034	0	0	1	3	1	2	0	0	0	0	0	1	0	274740	852770	0	0	0	0	0	82435	0	0	11939000	0	0	0	0	0	0	0	14	1209900	Tb927.10.10010	Tb927.10.10010_60S acidic ribosomal protein, putative | location=Tb927_10_v5.1:2468708-2469388(+) | length=226 | sequence_SO=chromosome | SO=protein_coding
Tb927.11.4450	ALBA2	RNA.binding	0	2	1.02	-1.0447	1.05	1.6395	0	2	1	6	2	2	2	0	0	0	6	5	3	2217300	2231000	1821000	0	0	0	4754300	3759400	1205800	19928000	18931000	17468000	0	0	0	26917000	20345000	8334100	7	15989000	Tb927.11.4450	Tb927.11.4450_ALBA-Domain Protein (ALBA2) | location=Tb927_11_v5.1:1291970-1292323(+) | length=117 | sequence_SO=chromosome | SO=protein_coding
Tb927.11.13050	calmodulin	Calcium	1	0	1.67	4.4455	1.04	2.0145	6	9	4	12	9	10	12	3	6	4	4	9	3	2111500	9361300	35352000	0	658530	125000	0	5941800	0	33599000	99532000	285670000	0	12898000	0	0	42007000	0	9	53550000	Tb927.11.13050;Tb927.11.13040;Tb927.11.13030;Tb927.11.13020	Tb927.11.13050_calmodulin | location=Tb927_11_v5.1:3487807-3488256(-) | length=149 | sequence_SO=chromosome | SO=protein_coding;Tb927.11.13040_calmodulin | loca
Tb927.10.4980	ubiquitin-like protein DSK2, putative (DSK2)	Ubiquitin.proteasome	0	0	3.42	-7.2508	1.04	-2.5715	1	0	1	7	0	0	2	0	0	1	6	6	6	0	0	1199800	0	0	128940	23107000	8232900	13110000	0	0	13061000	0	0	0	137790000	45614000	77437000	6	45779000	Tb927.10.4980	Tb927.10.4980_ubiquitin-like protein DSK2, putative (DSK2) | location=Tb927_10_v5.1:1237310-1238218(+) | length=302 | sequence_SO=chromosome | SO=protein_coding
Tb927.10.1060	Tric complex delta subunit (TCP-1-delta)	Chaperone	0	0	0.355	-1.03	1.03	-1.7271	1	0	1	9	4	0	2	0	0	1	2	0	6	337540	0	167460	0	0	75459	85785	0	455050	13017000	0	0	0	0	0	0	0	15516000	36	1121300	Tb927.10.1060	Tb927.10.1060_T-complex protein 1, delta subunit, putative (TCP-1-delta) | location=Tb927_10_v5.1:285416-287026(-) | length=536 | sequence_SO=chromosome | SO=protein_coding
Tb927.9.6290	arginine kinase (AK)	Amino.acids	0	0	0.2	0.2748	1.02	1.7512	3	8	3	18	16	8	12	0	0	3	4	6	10	7805600	1540100	5687400	0	0	765360	955490	1708200	3377000	120350000	33821000	89425000	0	0	21345000	20204000	30966000	55158000	17	21839000	Tb927.9.6290;Tb927.9.6230;Tb927.9.6170	Tb927.9.6290_arginine kinase (AK) | location=Tb927_09_v5.1:1033220-1034290(+) | length=356 | sequence_SO=chromosome | SO=protein_coding;Tb927.9.6230_unspecified
Tb927.10.15760	hypothetical protein, conserved, in flagellar proteomes, low homology to d tRNA methyltransferase of s: cerevisiae	Cytoskeleton	0	0	0.269	0.4873	1.02	-1.9609	0	0	1	2	2	0	0	0	0	0	0	0	0	384830	0	0	0	0	0	0	0	0	6157300	0	0	0	0	0	0	0	0	16	384830	Tb927.10.15760	Tb927.10.15760_hypothetical protein, conserved | location=Tb927_10_v5.1:3895573-3896520(+) | length=315 | sequence_SO=chromosome | SO=protein_coding
Tb927.8.1340	60S ribosomal protein L7a	Ribosome	0	0	0.495	-1.0881	1.02	1.0151	1	3	2	10	3	4	4	0	1	1	2	2	10	1645500	2574100	2482400	0	108450	116030	1072400	690020	18085000	18977000	29943000	27113000	0	0	0	12742000	10453000	166260000	10	26773000	Tb927.8.1340;Tb927.8.1330	Tb927.8.1340_60S ribosomal protein L7a, putative | location=Tb927_08_v5.1:429245-430075(-) | length=276 | sequence_SO=chromosome | SO=protein_coding;Tb927.8.1330 | organism=Trypanosoma_brucei_TREU927 | produc
Tb927.4.2740	EF hand protein, conserved, RNAi inc diff?	Translation	0	0	0.157	0.3988	1.02	-1.8693	1	0	1	4	1	0	3	0	0	1	0	0	0	0	0	666730	0	0	194760	0	0	0	0	0	8000700	0	0	0	0	0	0	12	861490	Tb927.4.2740	Tb927.4.2740_hypothetical protein, conserved | location=Tb927_04_v5.1:723054-723506(+) | length=150 | sequence_SO=chromosome | SO=protein_coding
Tb927.11.6510	40S ribosomal protein S21	Ribosome	0	0	0.584	-1.6316	1.01	-1.8142	0	0	2	1	0	0	1	0	0	0	0	0	1	0	0	866840	0	0	0	0	0	1946300	0	0	0	0	0	0	0	0	11678000	6	2813200	Tb927.11.6510;Tb927.11.6500	Tb927.11.6510_40S ribosomal protein S21, putative | location=Tb927_11_v5.1:1834506-1835090(-) | length=194 | sequence_SO=chromosome | SO=protein_coding;Tb927.11.6500 | organism=Trypanosoma_brucei_TREU927 | pr
Tb927.9.8420	60S ribosomal protein L10	Ribosome	0	0	0.913	-2.3251	0.977	-1.7099	0	0	2	6	2	1	0	0	0	0	0	0	6	430190	245020	0	0	0	0	0	0	3724300	0	0	0	0	0	0	0	0	40968000	11	4399500	Tb927.9.8420;Tb927.9.8070	Tb927.9.8420_60S ribosomal protein L10, putative,QM-like protein | location=Tb927_09_v5.1:1373386-1374027(-) | length=213 | sequence_SO=chromosome | SO=protein_coding;Tb927.9.8070 | organism=Trypanosoma_bruce
Tb927.11.3240	Tric complex zeta subunit (TCP-1-zeta)	Chaperone	0	0	1.87	-3.3821	0.974	-2.2455	9	1	1	14	9	1	6	0	1	9	12	8	9	901640	73015	606930	0	70854	687940	1750400	801900	1722700	27869000	0	24552000	0	0	21623000	43267000	30973000	45862000	30	6615400	Tb927.11.3240	Tb927.11.3240_T-complex protein 1, zeta subunit, putative (TCP-1-zeta) | location=Tb927_11_v5.1:925327-926961(+) | length=544 | sequence_SO=chromosome | SO=protein_coding
Tb927.10.13800	hypothetical protein, conserved, no yeast or human match	Cytoskeleton	0	0	1.24	-2.3986	0.967	-1.8686	0	1	1	3	2	1	1	0	0	0	3	3	1	416730	111990	278150	0	0	0	607820	469280	241780	8380400	0	0	0	0	0	10455000	8053900	0	18	2125700	Tb927.10.13800	Tb927.10.13800_hypothetical protein, conserved | location=Tb927_10_v5.1:3370491-3371462(-) | length=323 | sequence_SO=chromosome | SO=protein_coding
Tb927.10.2020	hexokinase (HK2)	Glucose.glycerol	1	0	2.16	1.6402	0.958	1.0641	6	13	1	19	19	14	13	0	1	6	3	3	7	4931300	1884900	2441600	0	68400	463610	324600	267310	732380	130800000	41504000	56914000	0	0	19554000	10775000	9833400	28847000	27	11114000	Tb927.10.2020	Tb927.10.2020_hexokinase (HK2) | location=Tb927_10_v5.1:529818-531233(+) | length=471 | sequence_SO=chromosome | SO=protein_coding
Tb927.11.15230	cytosolic coat protein, putative	Vesicular.transport	0	0	4.29	-4.739	0.941	-1.7918	1	1	1	6	1	2	1	1	0	0	6	4	2	210640	400520	111420	93335	0	0	3650100	2009900	824370	0	8787100	0	0	0	0	42625000	25305000	12787000	13	7300300	Tb927.11.15230	Tb927.11.15230_cytosolic coat protein, putative | location=Tb927_11_v5.1:4043487-4044173(-) | length=228 | sequence_SO=chromosome | SO=protein_coding
Tb927.10.14630	fibrillarin, putative	rRNA.tRNA.process	0	0	0.455	0.6835	0.932	-1.3595	0	0	2	3	0	3	0	0	0	0	0	0	0	0	577760	0	0	0	0	0	0	0	0	6355400	0	0	0	0	0	0	0	11	577760	Tb927.10.14630;Tb927.10.14750	Tb927.10.14630_fibrillarin, putative | location=Tb927_10_v5.1:3582235-3582921(-) | length=228 | sequence_SO=chromosome | SO=protein_coding;Tb927.10.14750_fibril
Tb927.10.8230	protein disulfide isomerase,ERp57-like, cofactor wth calnexin, putative	Chaperone	1	0	1.66	2.959	0.928	1.8593	6	7	2	12	9	7	10	0	0	6	2	1	7	3933000	1460700	3389300	0	0	1020000	41207	180680	1336800	110400000	50224000	82388000	0	0	36800000	0	0	43239000	29	11362000	Tb927.10.8230;Tb11.v5.0668	Tb927.10.8230_protein disulfide isomerase,bloodstream- specific protein 2 precursor | location=Tb927_10_v5.1:2043014-2044507(-) | length=497 | sequence_SO=chromosome | SO=protein_coding;Tb11.v5.0668 | organis
Tb927.7.1340	10 kDa heat shock protein, putative (HSP10)	Chaperone	0	0	0.836	1.3897	0.92	-1.6952	1	0	2	2	2	0	1	0	0	1	0	0	0	990720	0	772520	0	0	307560	0	0	0	6935000	0	0	0	0	0	0	0	0	7	2070800	Tb927.7.1340;Tb927.7.1320	Tb927.7.1340_10 kDa heat shock protein, putative (HSP10) | location=Tb927_07_v5.1:343648-343950(+) | length=100 | sequence_SO=chromosome | SO=protein_coding;Tb927.7.1320 | organism=Trypanosoma_brucei_TREU927
Tb927.9.6870	RBSR1	RNA.processing	0	0	0.0186	-0.0536	0.918	-1.7155	0	0	1	1	0	1	1	0	0	0	1	1	0	0	551100	645480	0	0	0	0	163730	0	0	0	0	0	0	0	0	1146100	0	7	1360300	Tb927.9.6870	Tb927.9.6870_RNA-binding protein, putative (RBSR1) | location=Tb927_09_v5.1:1125929-1126375(+) | length=148 | sequence_SO=chromosome | SO=protein_coding
Tb927.7.5760	MTR2/p15	Nuclear.transport	1	2	3.52	4.0564	0.915	1.7837	0	1	1	3	3	2	1	0	0	0	0	0	0	4675500	2849700	723280	0	0	0	0	0	0	19559000	18067000	0	0	0	0	0	0	0	5	8248500	Tb927.7.5760	Tb927.7.5760_nuclear transport factor 2 protein, putative (NFT2) | location=Tb927_07_v5.1:1554226-1554633(+) | length=135 | sequence_SO=chromosome | SO=protein_coding
Tb11.v5.0871	eIF3H	Translation	0	0	0.316	-0.3774	0.902	-1.1483	1	1	3	1	1	1	1	0	0	1	1	1	1	483740	347510	344120	0	0	120470	158980	227470	185690	0	0	0	0	0	0	0	0	2228300	12	1868000	Tb11.v5.0871;Tb927.8.1190;Tb927.8.1170	Tb11.v5.0871_hypothetical protein, conserved | location=Tb927_11_bin_v5.1:4540406-4541338(+) | length=310 | sequence_SO=random_sequence | SO=protein_coding;Tb927.8.1190 | organism=Trypanosoma_brucei_TREU927 |
Tb927.11.7380	glycerol-3-phosphate dehydrogenase (FAD-dependent), mitochondrial, TAO complex	Glucose.glycerol	1	0	2.77	2.7148	0.899	-1.2355	6	2	1	9	7	4	2	0	1	6	0	0	0	771660	360100	114350	0	56518	395690	0	0	0	22904000	12693000	7883400	0	0	12341000	0	0	0	34	1698300	Tb927.11.7380	Tb927.11.7380_glycerol-3-phosphate dehydrogenase (FAD-dependent), mitochondrial | location=Tb927_11_v5.1:2077880-2079691(+) | length=603 | sequence_SO=chromosome | SO=protein_coding
Tb927.10.6050	clathrin heavy chain (CHC)	Vesicular.transport	0	0	1.05	1.7753	0.894	-2.4525	71	31	3	78	37	32	31	1	48	71	9	10	14	2097000	1244900	1153300	0	2106800	9621800	112320	182400	479770	236650000	137410000	136280000	0	218540000	820730000	15213000	21878000	58536000	98	16998000	Tb927.10.6050;Tb11.v5.0198;Tb11.v5.0197	Tb927.10.6050_clathrin heavy chain (CHC) | location=Tb927_10_v5.1:1521816-1526927(-) | length=1703 | sequence_SO=chromosome | SO=protein_coding;Tb11.v5.0198_cla
Tb927.11.16760	Tric complex alpha subunit (TCP-1-alpha)	Chaperone	0	0	0.583	-1.2268	0.882	-1.6917	5	1	1	13	5	1	9	0	0	5	3	3	6	401870	74528	586400	0	0	299860	153610	139920	539190	14232000	0	12942000	0	0	9482000	7775800	0	14997000	30	2195400	Tb927.11.16760	Tb927.11.16760_T-complex protein 1, alpha subunit, putative (TCP-1-alpha) | location=Tb927_11_v5.1:4458329-4460458(-) | length=505 | sequence_SO=chromosome | SO=protein_coding
Tb927.10.14700	hypothetical protein, conserved, no human or yeast homologue	ZUnknown	0	0	0.21	-0.6016	0.873	1.266	0	1	1	4	2	2	1	0	0	0	3	3	1	851930	1672800	1420800	0	0	0	2264100	1559700	347410	13233000	29350000	0	0	0	0	36477000	22516000	0	16	8116700	Tb927.10.14700	Tb927.10.14700_hypothetical protein, conserved | location=Tb927_10_v5.1:3590505-3591533(-) | length=342 | sequence_SO=chromosome | SO=protein_coding
Tb927.4.1300	amidinotransferase, putative	ZUnknown	0	0	0.779	0.9052	0.869	1.722	6	8	1	18	15	8	10	0	0	6	3	4	10	7180700	2408300	4129900	0	0	1399200	482600	852890	3531600	125060000	52615000	76193000	0	0	36337000	12524000	19162000	57823000	19	19985000	Tb927.4.1300	Tb927.4.1300_amidinotransferase, putative | location=Tb927_04_v5.1:341209-342333(-) | length=374 | sequence_SO=chromosome | SO=protein_coding
Tb927.4.2530	hypothetical protein, conserved	ZUnknown	0	0	0.421	0.8224	0.867	-1.5068	0	0	1	1	1	0	0	0	0	0	0	0	0	1003500	0	0	0	0	0	0	0	0	6021200	0	0	0	0	0	0	0	0	6	1003500	Tb927.4.2530	Tb927.4.2530_hypothetical protein, conserved | location=Tb927_04_v5.1:667668-668334(+) | length=158 | sequence_SO=chromosome | SO=protein_coding
Tb927.10.7500	fibrillarin (NOP1)	rRNA.tRNA.process	1	2	6.25	2.607	0.852	1.2879	0	3	1	5	5	4	3	0	0	0	1	1	0	1044600	953700	677050	0	0	0	56294	132830	0	13109000	17626000	12071000	0	0	0	0	0	0	16	2864500	Tb927.10.7500	Tb927.10.7500_fibrillarin (NOP1) | location=Tb927_10_v5.1:1884555-1885457(-) | length=300 | sequence_SO=chromosome | SO=protein_coding
Tb927.6.4440	RBP42	RNA.binding	0	2	1.52	-0.8907	0.851	1.4489	0	1	1	4	4	3	1	0	0	0	3	3	1	1635500	1215100	404770	0	0	0	1032200	1267800	435030	15175000	13628000	10833000	0	0	0	12553000	14247000	11439000	13	5990300	Tb927.6.4440	Tb927.6.4440_hypothetical protein, conserved | location=Tb927_06_v5.1:1246165-1247223(-) | length=352 | sequence_SO=chromosome | SO=protein_coding
Tb927.6.2360	adenosine kinase, putative	Nucleotides	0	0	0.646	-1.2617	0.848	-1.6278	0	0	2	2	2	0	0	0	0	0	0	1	1	541650	0	0	0	0	0	0	137850	257910	10291000	0	0	0	0	0	0	0	0	19	937410	Tb927.6.2360;Tb927.6.2300	Tb927.6.2360_adenosine kinase, putative | location=Tb927_06_v5.1:727282-728319(+) | length=345 | sequence_SO=chromosome | SO=protein_coding;Tb927.6.2300_adenosi
Tb927.11.4700	prostaglandin f synthase	Lipids	0	0	0.303	1.7653	0.839	3.4014	0	0	1	5	4	0	4	0	0	0	1	1	1	23490000	0	15006000	0	0	0	5248600	76160	12628000	396820000	0	257620000	0	0	0	0	0	0	17	56449000	Tb927.11.4700	Tb927.11.4700_prostaglandin f synthase | location=Tb927_11_v5.1:1356892-1357722(+) | length=276 | sequence_SO=chromosome | SO=protein_coding
Tb927.5.3250	hypothetical protein, conserved, no clear yeast or human matches	ZUnknown	1	2	2.57	2.9006	0.839	1.2527	0	4	1	9	5	4	9	0	0	0	0	0	1	428930	245600	621160	0	0	0	0	0	6983.3	26801000	20390000	29255000	0	0	0	0	0	0	59	1302700	Tb927.5.3250	Tb927.5.3250_hypothetical protein, conserved | location=Tb927_05_v5.1:1068696-1073369(-) | length=1557 | sequence_SO=chromosome | SO=protein_coding
Tb927.10.4570	EF2 elongation factor 2	Translation	0	0	0.839	1.1651	0.835	1.5785	20	21	2	39	37	21	31	0	3	20	10	11	23	8744500	2673500	5567200	0	83180	1987000	586540	776070	3080300	391890000	144470000	243930000	0	3602600	113130000	32360000	47468000	164120000	49	23498000	Tb927.10.4570;Tb927.10.4560	Tb927.10.4570_elongation factor 2 | location=Tb927_10_v5.1:1166785-1169325(-) | length=846 | sequence_SO=chromosome | SO=protein_coding;Tb927.10.4560_elongation
Tb927.9.7520	hypothetical protein, conserved	ZUnknown	0	0	0.266	-0.6849	0.824	-1.5826	0	0	1	7	7	0	0	0	0	0	0	1	3	896460	0	0	0	0	0	0	134880	217450	17248000	0	0	0	0	0	0	0	7257900	22	1248800	Tb927.9.7520	Tb927.9.7520_hypothetical protein, conserved | location=Tb927_09_v5.1:1235234-1236274(-) | length=346 | sequence_SO=chromosome | SO=protein_coding
Tb11.v5.0501	40S ribosomal protein S3A	Ribosome	0	0	0.257	-1.1081	0.818	1.2558	1	2	3	14	3	2	2	1	0	0	4	0	14	1492400	992070	663820	73422	0	0	1430000	0	23098000	20906000	13956000	11895000	0	0	0	19920000	0	348460000	15	27750000	Tb11.v5.0501;Tb927.10.3940;Tb927.10.3930	Tb11.v5.0501_40S ribosomal protein S3A, putative | location=Tb927_11_bin_v5.1:2072629-2073399(+) | length=256 | sequence_SO=random_sequence | SO=protein_coding;Tb927.10.3940 | organism=Trypanosoma_brucei_TREU
Tb927.8.2090	cyclophilin type peptidyl-prolyl cis-trans isomerase, copurifed with splicing complexes	RNA.processing	0	0	0.882	-1.6439	0.815	-1.5754	0	1	1	2	1	1	1	0	0	0	2	1	0	557900	463840	367560	0	0	0	578340	600380	0	0	0	0	0	0	0	4048400	0	0	7	2568000	Tb927.8.2090	Tb927.8.2090_cyclophilin type peptidyl-prolyl cis-trans isomerase, putative (PPIase) | location=Tb927_08_v5.1:657751-658335(+) | length=194 | sequence_SO=chromosome | SO=protein_coding
Tb927.10.2890	enolase	Glucose.glycerol	0	0	0.0866	-0.0785	0.814	1.4153	22	22	2	32	27	22	26	1	4	22	20	22	25	25776000	12049000	16160000	50816	455210	7673500	6504200	9129200	15025000	620550000	300530000	401080000	0	11862000	213890000	187230000	230570000	353560000	25	92821000	Tb927.10.2890;Tb11.v5.0650	Tb927.10.2890_enolase | location=Tb927_10_v5.1:746309-747598(+) | length=429 | sequence_SO=chromosome | SO=protein_coding;Tb11.v5.0650_enolase, putative | locat
Tb927.11.14150	SPF27 / Snt309, part of PRP19 complex	RNA.processing	0	0	0.0491	0.1215	0.8	-1.0403	0	0	1	2	2	1	0	0	0	0	1	2	0	508410	282610	0	0	0	0	58766	425510	0	5853600	0	0	0	0	0	0	6287400	0	13	1275300	Tb927.11.14150	Tb927.11.14150_hypothetical protein, conserved | location=Tb927_11_v5.1:3748495-3749139(+) | length=214 | sequence_SO=chromosome | SO=protein_coding
Tb927.3.1820	mitochondrial RNA binding complex 1 subunit (MRB1820)	Mito.RNA	0	0	0.228	0.6077	0.795	-1.7553	0	1	1	3	1	1	3	0	0	0	0	0	0	280460	123700	945210	0	0	0	0	0	0	0	0	13233000	0	0	0	0	0	0	14	1349400	Tb927.3.1820	Tb927.3.1820_mitochondrial RNA binding complex 1 subunit (MRB1820) | location=Tb927_03_v5.1:472935-473672(-) | length=245 | sequence_SO=chromosome | SO=protein_coding
Tb927.11.510	UBP2	RNA.binding	0	0	1.45	-3.4048	0.778	-2.5107	5	2	2	7	4	2	4	1	5	5	5	5	7	9911500	4088100	4968700	0	7333500	12919000	18476000	9442200	44470000	49354000	0	29721000	0	23288000	36767000	99181000	52410000	139360000	4	111610000	Tb927.11.510;Tb927.11.500	Tb927.11.510_RNA-binding protein, UBP2 (UBP2) | location=Tb927_11_v5.1:126101-127274(-) | length=175 | sequence_SO=chromosome | SO=protein_coding;Tb927.11.500_R
Tb927.7.2650	CAP51V	Cytoskeleton	1	0	0.569	0.8605	0.773	-1.589	1	2	2	2	2	2	2	0	0	1	0	0	1	297130	133810	155380	0	0	31876	0	0	46134	8284400	3959400	4759500	0	0	0	0	0	0	29	664330	Tb927.7.2650;Tb927.7.2640	Tb927.7.2650_hypothetical protein, conserved | location=Tb927_07_v5.1:678884-680497(-) | length=537 | sequence_SO=chromosome | SO=protein_coding;Tb927.7.2640_hy
Tb927.7.4550	Mitochondrial ribosomal protein L7/L12	Mito.translation	0	0	0.089	0.2232	0.77	-1.462	0	0	2	2	0	2	0	0	0	0	0	0	0	0	471960	0	0	0	0	0	0	0	0	3775700	0	0	0	0	0	0	0	8	471960	Tb927.7.4550;Tb11.v5.0268	Tb927.7.4550_60S ribosomal protein-like | location=Tb927_07_v5.1:1209651-1210720(-) | length=183 | sequence_SO=chromosome | SO=protein_coding;Tb11.v5.0268_60S r
Tb927.6.4340	U2 SSm2-1/Sm15K, EmD3 paralogue in U2 Sm core (not Lsm5)	RNA.processing	0	2	0.14	-0.4107	0.762	1.7058	0	2	1	3	2	2	2	0	0	0	2	3	1	2245400	1507600	1417700	0	0	0	1777300	2656300	182700	17557000	0	10497000	0	0	0	13045000	15577000	0	7	9786900	Tb927.6.4340	Tb927.6.4340_U6 snRNA-associated Sm-like protein LSm5p (TbLSm5) | location=Tb927_06_v5.1:1225938-1226291(-) | length=117 | sequence_SO=chromosome | SO=protein_coding
Tb927.9.5190	proliferative cell nuclear antigen (PCNA)	DNA	0	0	0.196	-0.54	0.726	-1.5439	2	1	1	6	4	1	3	0	0	2	1	3	1	840340	95964	469060	0	0	330570	98886	588280	201970	10294000	0	8349500	0	0	0	0	9821800	0	15	2625100	Tb927.9.5190	Tb927.9.5190_proliferative cell nuclear antigen (PCNA), putative | location=Tb927_09_v5.1:916814-917692(+) | length=292 | sequence_SO=chromosome | SO=protein_coding
Tb927.6.1770	kinesin	Cytoskeleton	0	0	3.45	-3.9732	0.723	-2.0142	1	1	1	3	2	1	1	1	0	1	2	2	2	1461700	1026500	972090	564490	0	1932800	2518100	2111100	2284200	0	0	0	0	0	0	70527000	59309000	63741000	28	12871000	Tb927.6.1770	Tb927.6.1770_kinesin, putative | location=Tb927_06_v5.1:591149-593035(-) | length=628 | sequence_SO=chromosome | SO=protein_coding
Tb927.4.3840	nucleolar protein, putative	rRNA.tRNA.process	0	0	0.403	0.6378	0.716	-1.1049	0	0	1	3	0	3	0	0	0	0	0	0	0	0	464560	0	0	0	0	0	0	0	0	9291200	0	0	0	0	0	0	0	20	464560	Tb927.4.3840	Tb927.4.3840_nucleolar protein, putative | location=Tb927_04_v5.1:1001972-1004217(-) | length=525 | sequence_SO=chromosome | SO=protein_coding
Tb927.6.560	cysteine peptidase C (CPC), Clan CA, family C1, Cathepsin B-like (TbcatB)	Protease	0	0	0.299	-0.5797	0.709	-1.2712	0	0	1	1	0	0	1	0	0	0	1	0	0	0	0	264750	0	0	0	159500	0	0	0	0	0	0	0	0	1754500	0	0	11	424250	Tb927.6.560	Tb927.6.560_cysteine peptidase C (CPC),CPC cysteine peptidase, Clan CA, family C1, Cathepsin B-like (TbcatB) | location=Tb927_06_v5.1:238156-239178(-) | length=340 | sequence_SO=chromosome | SO=protein_coding
Tb927.7.7460	hypothetical protein, conserved, no domains	ZUnknown	0	0	0.144	-0.3277	0.692	-1.0541	0	0	1	4	3	2	0	0	0	0	3	1	0	718780	346830	0	0	0	0	452960	116410	0	8060100	4444700	0	0	0	0	4199500	0	0	11	1635000	Tb927.7.7460	Tb927.7.7460_hypothetical protein, conserved | location=Tb927_07_v5.1:2141726-2142349(-) | length=192 | sequence_SO=chromosome | SO=protein_coding
Tb927.11.880	cyclophilin a,cyclophilin type peptidyl-prolyl cis-trans isomerase (CYPA)	Chaperone	0	0	0.527	0.8344	0.691	1.6755	8	6	1	9	9	6	9	0	0	8	3	3	7	12213000	2474800	8691300	0	0	4473700	845610	1386800	5564900	126620000	32037000	94489000	0	0	47470000	11125000	16910000	63505000	11	35651000	Tb927.11.880	Tb927.11.880_cyclophilin a,cyclophilin type peptidyl-prolyl cis-trans isomerase (CYPA) | location=Tb927_11_v5.1:223796-225040(+) | length=177 | sequence_SO=chromosome | SO=protein_coding
Tb927.11.11590	eIF3E	Translation	0	0	0.961	1.8657	0.69	-1.5038	2	1	1	5	4	4	1	0	2	2	0	1	0	859160	599730	106110	0	192420	93076	0	84365	0	19857000	13697000	0	0	0	0	0	0	0	23	1934900	Tb927.11.11590	Tb927.11.11590_eukaryotic translation initiation factor, putative | location=Tb927_11_v5.1:3108243-3109775(+) | length=413 | sequence_SO=chromosome | SO=protein_coding
Tb927.7.2140	ZC3H18	RNA.binding	0	0	3.18	-5.138	0.683	-1.5766	0	0	2	5	0	0	3	0	0	0	5	2	4	0	0	707130	0	0	0	5307700	962480	4272700	0	0	11900000	0	0	0	61252000	16758000	45090000	12	11250000	Tb927.7.2140;Tb07.11L3.90	Tb927.7.2140_hypothetical protein,zinc finger protein family member, putative (ZC3H18) | location=Tb927_07_v5.1:544639-545769(-) | length=376 | sequence_SO=chromosome | SO=protein_coding;Tb07.11L3.90 | organi
Tb927.7.3120	small nuclear ribonucleoprotein SmD1	RNA.processing	0	0	1.27	-2.751	0.655	-1.6304	0	0	1	2	2	0	2	0	0	0	2	2	1	1414000	0	617680	0	0	0	1382400	1981600	224810	5594900	0	0	0	0	0	5371600	8145500	0	4	5620500	Tb927.7.3120	Tb927.7.3120_small nuclear ribonucleoprotein SmD1,SmD-1 like small nuclear ribonucleoprotein (Sm-D1) | location=Tb927_07_v5.1:792434-792754(+) | length=106 | sequence_SO=chromosome | SO=protein_coding
Tb927.8.4820	eIF4G3	Translation	0	2	1.92	-1.6398	0.646	1.0847	0	4	2	16	10	4	5	0	0	0	11	13	7	1551900	357070	491970	0	0	0	1660100	1713200	450720	41785000	16666000	22052000	0	0	0	47582000	46288000	18601000	31	6225000	Tb927.8.4820;Tb11.v5.0659	Tb927.8.4820_eukaryotic translation initation factor 4 gamma, putative | location=Tb927_08_v5.1:1422184-1424052(-) | length=622 | sequence_SO=chromosome | SO=protein_coding;Tb11.v5.0659 | organism=Trypanosoma
Tb927.5.2080	guanosine monophosphate reductase, putative	Nucleotides	0	0	0.0112	-0.0624	0.607	1.9457	0	0	1	17	0	13	16	0	0	0	12	11	0	0	3003500	4908300	0	0	0	1881000	1114100	0	0	91370000	121690000	0	0	0	74386000	50664000	0	31	10907000	Tb927.5.2080	Tb927.5.2080_guanosine monophosphate reductase, putative | location=Tb927_05_v5.1:712607-714082(-) | length=491 | sequence_SO=chromosome | SO=protein_coding
Tb927.10.2010	hexokinase (HK1)	Glucose.glycerol	1	0	2.45	2.1402	0.599	-0.7046	2	2	1	19	2	2	2	0	0	2	0	0	1	590830	275880	457040	0	0	236350	0	0	104820	15593000	7749500	12284000	0	0	6495700	0	0	0	27	1664900	Tb927.10.2010	Tb927.10.2010_hexokinase (HK1) | location=Tb927_10_v5.1:526772-528187(+) | length=471 | sequence_SO=chromosome | SO=protein_coding
Tb10.v4.0053	hypothetical protein, 411 kDa mostly peptide repeats	ZUnknown	0	0	0.0301	0.1242	0.594	-1.6137	4	5	4	7	7	5	6	1	2	4	6	4	5	430460	262410	347890	6955.9	52585	182260	125260	104030	180920	124730000	85087000	104440000	0	28381000	61762000	41551000	38385000	56803000	321	1692800	Tb10.v4.0053;Tb10.v4.0052;Tb927.10.10360;Tb927.10.10280	Tb10.v4.0053_hypothetical protein,chrX additional, unordered contigs | location=tryp_X-106b08.p1c:1-12357(-) | length=4119 | sequence_SO=contig | SO=protein_coding;Tb10.v4.0052 | organism=Trypanosoma_brucei_T
Tb927.8.1870	Golgi/lysosome glycoprotein 1 (tGLP1)	Vesicular.transport	0	0	0.373	1.0049	0.593	-1.4563	2	1	1	7	7	1	5	0	0	2	1	0	2	857880	25911	412810	0	0	113010	40374	0	120970	23411000	0	8885900	0	0	4777500	0	0	6561000	29	1570900	Tb927.8.1870	Tb927.8.1870_Golgi/lysosome glycoprotein 1 (tGLP1) | location=Tb927_08_v5.1:610606-612456(-) | length=616 | sequence_SO=chromosome | SO=protein_coding
Tb927.9.11270	Tric complex eta subunit (TCP-1-eta)	Chaperone	0	0	2.12	-2.6356	0.582	-1.1589	1	2	1	8	5	2	4	0	0	1	7	6	6	368530	107630	233290	0	0	0	496020	432480	576260	13547000	6784000	10360000	0	0	0	14483000	13480000	16628000	34	2214200	Tb927.9.11270	Tb927.9.11270_T-complex protein 1, eta subunit, putative,t- complex protein 1 (eta subunit), putative (TCP-1-eta) | location=Tb927_09_v5.1:1779935-1781641(+) | length=568 | sequence_SO=chromosome | SO=protein
Tb927.9.13380	phosphoinositide-binding protein, putative	Enzyme	0	0	0.545	-1.1314	0.571	-1.0999	2	3	1	10	4	3	6	0	0	2	2	6	6	367620	129010	751120	0	0	169110	131770	481130	500090	8484500	5596900	13476000	0	0	6701700	0	8010300	12887000	23	2529900	Tb927.9.13380	Tb927.9.13380_phosphoinositide-binding protein, putative | location=Tb927_09_v5.1:2120407-2121666(-) | length=419 | sequence_SO=chromosome | SO=protein_coding
Tb927.10.6370	60S ribosomal protein L5	Ribosome	0	0	0.5	-1.54	0.567	-1.3439	0	0	2	1	0	1	1	0	0	0	1	0	1	0	557170	1192700	0	0	0	602870	0	1968800	0	0	0	0	0	0	0	0	5906300	3	4321500	Tb927.10.6370;Tb927.10.220	Tb927.10.6370_60S ribosomal proteins L37, putative | location=Tb927_10_v5.1:1612318-1612599(-) | length=93 | sequence_SO=chromosome | SO=protein_coding;Tb927.10.220 | organism=Trypanosoma_brucei_TREU927 | pro
Tb927.8.7410	calreticulin, putative	Vesicular.transport	0	0	0.866	1.4535	0.565	-1.2976	3	0	2	7	5	0	3	0	0	3	1	1	2	956070	0	387660	0	0	337320	35059	43175	134930	20424000	0	12202000	0	0	12762000	0	0	0	27	1894200	Tb927.8.7410;Tb927.4.5010	Tb927.8.7410_calreticulin, putative | location=Tb927_08_v5.1:2134955-2136142(+) | length=395 | sequence_SO=chromosome | SO=protein_coding;Tb927.4.5010_calreticu
Tb927.10.12660	PUF2	RNA.binding	0	0	4.75	-3.4607	0.54	-0.9225	4	4	1	16	4	4	5	0	1	4	13	13	9	426990	349560	381760	0	37854	406860	2585200	2643200	1653500	20175000	14641000	16692000	0	0	22009000	66968000	66046000	55331000	31	8485000	Tb927.10.12660	Tb927.10.12660_pumilio/PUF RNA binding protein 2 (PUF2) | location=Tb927_10_v5.1:3073565-3076108(-) | length=847 | sequence_SO=chromosome | SO=protein_coding
Tb927.6.1870	eIF4E4	Translation	0	2	1.15	-1.5585	0.535	1.0461	0	2	1	10	9	2	3	0	0	0	6	7	3	1560200	164070	417510	0	0	0	1191700	1135000	351730	36136000	6127400	17216000	0	0	0	20246000	23244000	7894800	23	4820200	Tb927.6.1870	Tb927.6.1870_eukaryotic translation initiation factor 4e, putative | location=Tb927_06_v5.1:621138-622421(-) | length=427 | sequence_SO=chromosome | SO=protein_coding
Tb927.10.5830	hypothetical protein, conserved, 4-5 RanBP2 Zn fingers, matches varios yeast/human proteins with motif	Zinc.finger	0	0	0.159	0.3061	0.531	-1.1053	0	1	1	2	2	1	1	0	0	0	0	0	0	395230	177620	61061	0	0	0	0	0	0	11462000	0	0	0	0	0	0	0	0	29	633910	Tb927.10.5830	Tb927.10.5830_hypothetical protein, conserved | location=Tb927_10_v5.1:1446589-1448229(-) | length=546 | sequence_SO=chromosome | SO=protein_coding
Tb927.10.15310	hypothetical protein, conserved, linked to melarsoprol resistance, no yeast/human by NCBI	ZUnknown	1	2	3.9	3.3816	0.514	1.0686	0	2	2	6	3	2	6	0	0	0	0	0	0	640250	416490	919280	0	0	0	0	0	0	18651000	13433000	17317000	0	0	0	0	0	0	25	1976000	Tb927.10.15310;REV__Tb927.10.2600	Tb927.10.15310_hypothetical protein, conserved | location=Tb927_10_v5.1:3745784-3747139(+) | length=451 | sequence_SO=chromosome | SO=protein_coding
Tb927.11.2650	heat shock protein 84, putative, mit HSp90	Chaperone	0	2	0.445	0.8552	0.501	-1.0368	0	1	1	5	4	1	4	0	0	0	0	0	1	260360	51122	214380	0	0	0	0	0	50287	12686000	0	9151900	0	0	0	0	0	0	46	576150	Tb927.11.2650	Tb927.11.2650_heat shock protein 84, putative | location=Tb927_11_v5.1:776838-779109(-) | length=753 | sequence_SO=chromosome | SO=protein_coding
Tb927.1.3010	TbPAMC4, RNA editing	Mito.RNA	0	0	0.181	0.4215	0.498	-1.1126	0	0	1	2	1	1	0	0	0	0	0	0	0	101260	696510	0	0	0	0	0	0	0	0	14627000	0	0	0	0	0	0	0	21	797760	Tb927.1.3010	Tb927.1.3010_mRNA processing protein, putative | location=Tb927_01_v5.1:668456-669910(+) | length=372 | sequence_SO=chromosome | SO=protein_coding
Tb927.4.2450	Protein Disulfide Isomerase 1	Redox	0	0	0.687	1.0576	0.498	-0.7998	2	2	1	7	6	3	2	0	0	2	0	1	2	740740	241760	268860	0	0	139210	0	30676	253050	11057000	5302600	8403500	0	0	5082300	0	0	7957900	23	1674300	Tb927.4.2450	Tb927.4.2450_thioredoxin, putative | location=Tb927_04_v5.1:636846-638081(+) | length=411 | sequence_SO=chromosome | SO=protein_coding
Tb927.7.2330	Protein of unknown function (DUF1663), putative	ZUnknown	1	2	2.18	2.9506	0.486	0.8679	0	2	1	4	4	2	3	0	0	0	0	0	0	670810	186970	503340	0	0	0	0	0	0	26610000	11097000	23543000	0	0	0	0	0	0	45	1361100	Tb927.7.2330	Tb927.7.2330_hypothetical protein, conserved | location=Tb927_07_v5.1:599448-602747(-) | length=1099 | sequence_SO=chromosome | SO=protein_coding
Tb927.11.7218	MERS2, component of mitochondrial complex containing the MERS1 NUDIX hydrolase	Mito.RNA	1	2	2.08	2.5384	0.464	0.9301	0	3	2	10	3	5	10	0	0	0	0	0	0	138330	243570	903800	0	0	0	0	0	0	13248000	17895000	43428000	0	0	0	0	0	0	58	1285700	Tb927.11.7218;Tb11.02.5120b	Tb927.11.7218_mitochondrial edited mRNA stability factor 1 subunit | location=Tb927_11_v5.1:2032952-2035792(+) | length=946 | sequence_SO=chromosome | SO=protein_coding;Tb11.02.5120b | organism=Trypanosoma_br
Tb927.10.200	vacuolar ATP synthase, putative	Lysosome	0	0	0.742	-1.9795	0.463	-1.1759	0	0	1	1	1	0	1	0	0	0	1	1	1	2236200	0	1095300	0	0	0	1129400	624000	1243000	0	0	0	0	0	0	0	0	3729100	3	6327900	Tb927.10.200	Tb927.10.200_vacuolar ATP synthase, putative | location=Tb927_10_v5.1:74522-75097(+) | length=191 | sequence_SO=chromosome | SO=protein_coding
Tb927.8.990	RBP33	RNA.binding	1	2	1.35	1.7664	0.46	-0.9237	0	1	1	2	2	1	2	0	0	0	0	0	0	639410	175930	545090	0	0	0	0	0	0	9644700	0	8122800	0	0	0	0	0	0	15	1360400	Tb927.8.990	Tb927.8.990_RNA-binding protein, putative (RBP33) | location=Tb927_08_v5.1:316063-317019(-) | length=318 | sequence_SO=chromosome | SO=protein_coding
Tb927.10.14780	protein kinase, putative,mitogen-activated protein kinase kinase kinase, putative	Protein.kinase	0	0	0.382	-0.1959	0.442	-1.1294	7	3	1	8	5	4	3	0	3	7	3	3	3	2273000	1696800	1565200	0	1027900	3104100	635900	943030	1149300	34208000	22939000	29051000	0	16108000	43221000	16200000	23174000	25819000	17	12395000	Tb927.10.14780	Tb927.10.14780_protein kinase, putative,mitogen-activated protein kinase kinase kinase, putative | location=Tb927_10_v5.1:3603549-3604403(-) | length=284 | sequence_SO=chromosome | SO=protein_coding
Tb927.11.8320	hypothetical protein, conserved	ZUnknown	0	2	0.412	0.9776	0.43	-1.1476	0	1	1	5	5	1	3	0	0	0	0	0	0	809330	43442	180910	0	0	0	0	0	0	16485000	0	9260900	0	0	0	0	0	0	26	1033700	Tb927.11.8320	Tb927.11.8320_hypothetical protein, conserved | location=Tb927_11_v5.1:2336580-2337884(+) | length=434 | sequence_SO=chromosome | SO=protein_coding
Tb927.4.1500	RNA editing associated helicase 2 (REH2) MRB 1 subunit	Mito.RNA	1	2	1.53	3.815	0.419	1.3363	0	6	1	45	17	6	44	0	0	0	0	0	0	499870	99032	1911300	0	0	0	0	0	0	61913000	15875000	215910000	0	0	0	0	0	0	117	2510200	Tb927.4.1500	Tb927.4.1500_RNA editing associated helicase 2 (REH2) | location=Tb927_04_v5.1:381085-387588(-) | length=2167 | sequence_SO=chromosome | SO=protein_coding
Tb927.11.17000	AIR9	Cell.cycle	1	0	0.137	0.3279	0.412	-0.9154	1	2	2	6	5	2	2	0	0	1	0	0	0	308310	88778	110740	0	0	19060	0	0	0	12157000	6070500	6655500	0	0	0	0	0	0	49	526880	Tb927.11.17000;Tb11.v5.0404	Tb927.11.17000_leucine-rich repeat protein (LRRP), putative | location=Tb927_11_v5.1:4531475-4535811(-) | length=999 | sequence_SO=chromosome | SO=protein_coding;Tb11.v5.0404 | organism=Trypanosoma_brucei_TRE
Tb927.2.4590	branched-chain amino acid aminotransferase, putative	Amino.acids	0	0	0.422	0.8097	0.411	0.6869	1	2	3	10	9	2	7	0	0	1	1	2	4	2382900	210280	884850	0	0	130120	76294	174610	539350	36094000	6111700	12484000	0	0	0	0	4765700	11809000	17	4398400	Tb927.2.4590;Tb11.v5.0820;Tb927.2.4610	Tb927.2.4590_branched-chain amino acid aminotransferase, putative | location=Tb927_02_v5.1:816649-817752(-) | length=367 | sequence_SO=chromosome | SO=protein_coding;Tb11.v5.0820 | organism=Trypanosoma_brucei
Tb927.11.14960	PUF7	rRNA.tRNA.process	0	0	0.267	0.6486	0.41	-1.1542	0	0	1	5	0	5	0	0	0	0	0	0	0	0	386630	0	0	0	0	0	0	0	0	15079000	0	0	0	0	0	0	0	39	386630	Tb927.11.14960	Tb927.11.14960_pumilio/PUF RNA binding protein 7, putative (PUF7) | location=Tb927_11_v5.1:3978899-3981013(-) | length=704 | sequence_SO=chromosome | SO=protein_coding
Tb927.10.5400	hypothetical protein, conserved	Mito.pathway	0	0	0.521	1.8214	0.408	-1.4853	0	0	1	1	0	0	1	0	0	0	0	0	0	0	0	2507200	0	0	0	0	0	0	0	0	70203000	0	0	0	0	0	0	28	2507200	Tb927.10.5400	Tb927.10.5400_hypothetical protein, conserved | location=Tb927_10_v5.1:1359987-1361711(+) | length=574 | sequence_SO=chromosome | SO=protein_coding
Tb927.7.4520	Thioredoxin-like, putative	ZUnknown	0	0	0.0466	0.1363	0.382	-0.8974	4	1	2	5	4	1	2	0	0	4	1	3	4	2261100	258060	770950	0	0	1200700	72511	396990	1191100	23282000	0	12889000	0	0	8717100	0	4261200	9059200	10	6151400	Tb927.7.4520;Tb11.v5.0265	Tb927.7.4520_hypothetical protein, conserved | location=Tb927_07_v5.1:1203703-1204308(-) | length=201 | sequence_SO=chromosome | SO=protein_coding;Tb11.v5.0265_
Tb927.3.3670	TRRM3	RNA.binding	0	0	0.723	1.199	0.378	-0.8292	0	0	1	6	2	6	0	0	0	0	1	0	0	137090	718100	0	0	0	0	50526	0	0	7794100	14441000	0	0	0	0	0	0	0	26	905710	Tb927.3.3670	Tb927.3.3670_RNA-binding protein, putative (TRRM3) | location=Tb927_03_v5.1:1027144-1029015(+) | length=623 | sequence_SO=chromosome | SO=protein_coding
Tb927.11.11690	Vacuolar proton pump subunit B, putative	Lysosome	0	0	0.638	0.8149	0.375	-0.7718	1	1	1	3	3	1	2	0	0	1	1	1	1	513450	165900	360840	0	0	183160	95132	97433	179060	11625000	0	9358100	0	0	0	0	0	0	24	1595000	Tb927.11.11690	Tb927.11.11690_vacuolar ATP synthase subunit b, putative,v- ATPase B subunit,vacuolar proton pump B subunit | location=Tb927_11_v5.1:3135820-3137307(+) | length=495 | sequence_SO=chromosome | SO=protein_codin
Tb927.11.1900	Tric complex beta subunit (TCP-1-beta)	Chaperone	0	0	0.237	-0.8194	0.358	-1.0454	1	1	1	14	12	1	4	0	0	1	2	1	6	927790	52071	361190	0	0	78351	132690	61676	520630	30489000	0	13199000	0	0	0	5933600	0	14474000	33	2134400	Tb927.11.1900	Tb927.11.1900_T-complex protein 1, beta subunit, putative | location=Tb927_11_v5.1:555971-557790(-) | length=529 | sequence_SO=chromosome | SO=protein_coding
Tb927.1.120	retrotransposon hot spot protein 4 (RHS4), putative	RHS	1	0	2.32	2.636	0.357	0.7412	1	5	1	14	8	13	5	0	0	1	1	2	0	650360	1270800	252910	0	0	51972	32674	52427	0	19224000	62515000	14290000	0	0	0	0	4162400	0	45	2311100	Tb927.1.120	Tb927.1.120_retrotransposon hot spot protein 4 (RHS4), putative | location=Tb927_01_v5.1:60266-62836(-) | length=856 | sequence_SO=chromosome | SO=protein_coding
Tb927.9.4680	eIF4A1	Translation	0	0	0.0539	0.0835	0.356	0.8692	8	7	1	16	12	7	13	0	2	8	6	9	12	5711700	1378200	5972600	0	155290	1833500	828500	1554300	3716300	123140000	41903000	90851000	0	4528700	44249000	28891000	40066000	65988000	21	21150000	Tb927.9.4680	Tb927.9.4680_ATP-dependent DEAD box helicase, putative | location=Tb927_09_v5.1:864680-865894(+) | length=404 | sequence_SO=chromosome | SO=protein_coding
Tb927.10.14890	C-terminal motor kinesin KIFC1	Cytoskeleton	0	0	1.31	2.4598	0.35	0.8784	9	4	2	15	13	4	12	0	0	9	1	1	8	2059300	403490	1560900	0	0	632250	27014	71783	429440	75840000	28025000	60497000	0	0	31315000	0	0	40917000	47	5184100	Tb927.10.14890;Tb11.v5.0636	Tb927.10.14890_C-terminal motor kinesin, putative (TBKIFC1) | location=Tb927_10_v5.1:3633146-3635608(+) | length=820 | sequence_SO=chromosome | SO=protein_coding;Tb11.v5.0636 | organism=Trypanosoma_brucei_TRE
Tb927.8.4430	uridine phosphorylase	Nucleotides	0	0	0.164	0.3453	0.35	0.6697	4	2	1	11	7	2	5	0	0	4	1	3	6	2372800	405080	1249300	0	0	451370	94685	333270	1619600	36333000	9632300	19236000	0	0	11992000	0	9193400	22946000	17	6526100	Tb927.8.4430	Tb927.8.4430_uridine phosphorylase | location=Tb927_08_v5.1:1315427-1317090(-) | length=341 | sequence_SO=chromosome | SO=protein_coding
Tb927.3.1930	CDC40 / PRP17	RNA.processing	0	2	0.281	-0.6206	0.345	0.4812	0	2	1	9	4	4	2	0	0	0	7	7	0	641620	729430	233080	0	0	0	882520	1003400	0	18653000	16827000	8590800	0	0	0	19159000	24022000	0	25	3490100	Tb927.3.1930	Tb927.3.1930_hypothetical protein, conserved | location=Tb927_03_v5.1:507936-509375(-) | length=479 | sequence_SO=chromosome | SO=protein_coding
Tb927.11.11150	U5 snRNP-specific 40 kDa protein U5-40K	RNA.processing	0	2	0.539	-0.7456	0.337	-0.5839	0	2	1	5	4	2	2	0	0	0	4	2	0	498290	296720	192120	0	0	0	406740	403190	0	7427300	6515500	4119000	0	0	0	5375200	8910000	0	18	1797100	Tb927.11.11150	Tb927.11.11150_U5 snRNP-specific 40 kDa protein | location=Tb927_11_v5.1:2985149-2986129(+) | length=326 | sequence_SO=chromosome | SO=protein_coding
Tb927.10.5810	BARTL1	Cytoskeleton	0	0	1.24	2.4867	0.331	0.6213	2	4	1	10	8	4	8	0	0	2	0	1	5	1864700	471850	1584600	0	0	303170	0	118490	765420	48508000	15778000	38566000	0	0	12025000	0	0	19847000	27	5108300	Tb927.10.5810	Tb927.10.5810_hypothetical protein, conserved | location=Tb927_10_v5.1:1440824-1442125(-) | length=433 | sequence_SO=chromosome | SO=protein_coding
Tb927.7.1050	40S ribosomal protein S16	Ribosome	0	0	1.42	-4.0848	0.325	-0.9585	0	0	2	8	0	1	2	0	0	0	4	1	7	0	684380	1292000	0	0	0	4984800	515190	12363000	0	0	16934000	0	0	0	47143000	0	85041000	8	19839000	Tb927.7.1050;Tb927.7.1040	Tb927.7.1050_40S ribosomal protein S16, putative | location=Tb927_07_v5.1:268952-269401(+) | length=149 | sequence_SO=chromosome | SO=protein_coding;Tb927.7.1040 | organism=Trypanosoma_brucei_TREU927 | produc
Tb927.10.6880	glyceraldehyde 3-phosphate dehydrogenase, cytosolic (GAP)	Glucose.glycerol	0	0	0.399	-1.0013	0.316	-0.9367	2	1	2	6	2	1	2	1	0	2	1	3	3	1060100	427840	966350	392620	0	1134700	817040	948610	1532000	21237000	0	27958000	0	0	0	0	18174000	27278000	21	7279200	Tb927.10.6880;Tb11.v5.0516	Tb927.10.6880_glyceraldehyde 3-phosphate dehydrogenase, cytosolic (GAP) | location=Tb927_10_v5.1:1730120-1731115(+) | length=331 | sequence_SO=chromosome | SO=protein_coding;Tb11.v5.0516 | organism=Trypanosom
Tb927.6.2700	small nuclear ribonucleoprotein Sm-E	RNA.processing	0	0	0.502	-1.4538	0.313	-0.7421	0	0	1	2	1	0	1	0	0	0	1	2	0	885810	0	692150	0	0	0	961580	1865000	0	0	0	0	0	0	0	0	9325200	0	5	4404600	Tb927.6.2700	Tb927.6.2700_small nuclear ribonucleoprotein Sm-E (Sm-E) | location=Tb927_06_v5.1:811050-811333(+) | length=86 | sequence_SO=chromosome | SO=protein_coding
Tb927.11.1980	ZC3H41	RNA.binding	0	2	0.3	0.7722	0.309	0.5541	0	3	1	8	5	4	3	0	0	0	5	4	1	883770	445270	349830	0	0	0	652910	325220	88045	21126000	13991000	13155000	0	0	0	16087000	10036000	0	28	2745000	Tb927.11.1980	Tb927.11.1980_zinc finger protein family member, putative (ZC3H41) | location=Tb927_11_v5.1:574332-575885(+) | length=517 | sequence_SO=chromosome | SO=protein_coding
Tb927.10.11760	PUF6	RNA.binding	0	0	3.17	-1.9946	0.307	0.6291	9	10	1	21	12	10	10	0	1	9	15	12	16	1755300	1121300	1492600	0	46675	1036300	4256500	2532000	4392500	70103000	50067000	73065000	0	0	43807000	127490000	81115000	118290000	34	16633000	Tb927.10.11760	Tb927.10.11760_pumilio/PUF RNA binding protein 6 (PUF6) | location=Tb927_10_v5.1:2869425-2871956(+) | length=843 | sequence_SO=chromosome | SO=protein_coding
Tb927.9.5840	tryparedoxin peroxidase (TRYP1)	Redox	0	0	0.0879	0.1022	0.292	-0.4454	4	2	2	5	4	2	2	1	1	4	2	2	3	2989000	1095600	1406500	0	136690	1671000	537110	582600	1530600	31482000	17576000	22864000	0	0	17645000	8702400	9480500	19811000	13	9949100	Tb927.9.5840;Tb927.9.5750	Tb927.9.5840_unspecified product (TRYP1) | location=Tb927_09_v5.1:989953-990552(+) | length=199 | sequence_SO=chromosome | SO=protein_coding;Tb927.9.5750_unspec
Tb927.1.710	phosphoglycerate kinase (PGKB)	Glucose.glycerol	0	0	0.399	-0.9212	0.29	-0.6313	0	1	1	20	1	1	1	0	0	0	1	1	1	772470	720420	514560	0	0	0	481900	380890	375870	0	0	0	0	0	0	0	0	9772700	26	3246100	Tb927.1.710	Tb927.1.710_phosphoglycerate kinase (PGKB) | location=Tb927_01_v5.1:234158-235420(-) | length=420 | sequence_SO=chromosome | SO=protein_coding
Tb927.11.11250	cytosolic malate dehydrogenase (cMDH)	Glucose.glycerol	0	0	1.06	1.649	0.279	-0.2609	1	3	1	3	3	3	3	0	0	1	0	1	2	615600	439930	522900	0	0	160370	0	119080	282070	8029200	6134300	7992700	0	0	0	0	0	5751200	15	2139900	Tb927.11.11250	Tb927.11.11250_cytosolic malate dehydrogenase (cMDH) | location=Tb927_11_v5.1:3011678-3012664(+) | length=328 | sequence_SO=chromosome | SO=protein_coding
Tb927.11.14100	DRBD4 (PTB2)	RNA.binding	0	2	0.468	0.519	0.271	0.4297	0	3	1	4	3	4	3	0	0	0	2	4	1	720600	597990	503340	0	0	0	242090	389850	155860	15423000	9854900	9360000	0	0	0	7162200	9730500	0	21	2609700	Tb927.11.14100	Tb927.11.14100_DRBD4 (DRBD4) | location=Tb927_11_v5.1:3736962-3739072(+) | length=505 | sequence_SO=chromosome | SO=protein_coding
Tb927.8.3530	glycerol-3-phosphate dehydrogenase (NAD), glycosomal	Glucose.glycerol	0	0	1.57	0.6112	0.267	0.4381	5	5	1	9	9	5	6	0	2	5	4	6	5	7867600	3374200	3307400	0	293510	1872200	1230300	1716400	1560000	118480000	52608000	51157000	0	7377000	32670000	22768000	26657000	27825000	16	21222000	Tb927.8.3530	Tb927.8.3530_glycerol-3-phosphate dehydrogenase [NAD ], glycosomal | location=Tb927_08_v5.1:1057304-1058368(-) | length=354 | sequence_SO=chromosome | SO=protein_coding
Tb927.5.1820	40S ribosomal protein S4	Ribosome	0	0	0.47	-1.3836	0.261	-0.6477	0	1	1	1	1	1	1	0	0	0	1	1	1	1446400	848870	646500	0	0	0	1412300	2091000	865720	0	0	0	0	0	0	0	0	2597200	3	7310800	Tb927.5.1820	Tb927.5.1820_60S acidic ribosomal protein, putative | location=Tb927_05_v5.1:621061-621384(+) | length=107 | sequence_SO=chromosome | SO=protein_coding
Tb927.11.7510	luminal binding protein 1 (BiP), putative	Vesicular.transport	0	0	0.201	0.1578	0.256	0.3542	19	33	2	43	39	33	38	9	5	19	31	27	30	20418000	10508000	13731000	729620	302870	2936800	6401300	5778000	6970000	670770000	379020000	422110000	32037000	13805000	135290000	246700000	245610000	275170000	36	67776000	Tb927.11.7510;Tb927.11.7460	Tb927.11.7510_glucose-regulated protein 78, putative,luminal binding protein 1 (BiP), putative | location=Tb927_11_v5.1:2125537-2128170(-) | length=653 | sequence_SO=chromosome | SO=protein_coding;Tb927.11.74
Tb927.10.8950	kinetoplast DNA-associated protein, putative	Mito.DNA	0	0	0.4	0.905	0.239	-0.5812	0	0	2	2	0	2	1	0	0	0	0	0	0	0	1202900	626470	0	0	0	0	0	0	0	0	3758800	0	0	0	0	0	0	6	1829300	Tb927.10.8950;Tb927.10.8970	Tb927.10.8950_kinetoplast DNA-associated protein, putative | location=Tb927_10_v5.1:2223104-2223484(+) | length=126 | sequence_SO=chromosome | SO=protein_coding;Tb927.10.8970 | organism=Trypanosoma_brucei_TRE
Tb927.10.14140	pyruvate kinase 1 (PYK1)	Glucose.glycerol	0	0	0.0381	-0.0555	0.222	0.4837	17	15	2	27	25	15	22	1	4	17	13	13	21	20123000	4689000	13309000	84687	718270	7058900	3567500	4205700	11352000	450760000	156260000	307320000	0	19464000	202370000	126650000	149390000	273230000	26	65108000	Tb927.10.14140;Tb11.v5.0605	Tb927.10.14140_pyruvate kinase 1 (PYK1) | location=Tb927_10_v5.1:3434717-3436216(-) | length=499 | sequence_SO=chromosome | SO=protein_coding;Tb11.v5.0605_pyruv
Tb927.10.540	ATP-dependent DEAD/H RNA helicase, Named as orthologue of TcSUB2, RNAi causes poly(A) accumulation in nucleus.	RNA.helicase	0	0	2.72	1.8275	0.218	0.3307	3	3	2	6	5	5	3	0	0	3	1	2	1	1391400	819460	661750	0	0	403080	50043	232590	216210	25376000	15077000	14946000	0	0	10070000	0	8205000	0	21	3774600	Tb927.10.540;Tb11.v5.0414	Tb927.10.540_ATP-dependent DEAD/H RNA helicase, putative,DEAD box RNA helicase, putative | location=Tb927_10_v5.1:140816-142126(+) | length=436 | sequence_SO=chromosome | SO=protein_coding;Tb11.v5.0414 | orga
Tb927.10.16100	FK506-binding protein (FKBP)-type peptidyl-prolyl isomerase	Chaperone	0	0	0.905	1.774	0.216	0.4437	3	4	2	11	8	4	4	0	0	3	1	1	7	2542200	366480	911940	0	0	378120	74491	80001	980920	39308000	10599000	20261000	0	0	10380000	0	0	17865000	19	5334100	Tb927.10.16100;Tb11.v5.0411	Tb927.10.16100_FK506-binding protein (FKBP)-type peptidyl-prolyl isomerase, putative | location=Tb927_10_v5.1:3959421-3960698(+) | length=425 | sequence_SO=chromosome | SO=protein_coding;Tb11.v5.0411 | organi
Tb927.11.8970	ribose 5-phosphate isomerase, putative	PPP	0	0	1.96	2.2279	0.216	0.426	1	1	1	2	2	1	1	0	0	1	0	1	1	1325600	342840	984200	0	0	284640	0	174670	189090	9932400	3603500	10338000	0	0	0	0	0	0	9	3301000	Tb927.11.8970	Tb927.11.8970_ribose 5-phosphate isomerase, putative | location=Tb927_11_v5.1:2461686-2462708(+) | length=155 | sequence_SO=chromosome | SO=protein_coding
Tb927.11.5520	triosephosphate isomerase (TIM)	Glucose.glycerol	0	0	0.0754	0.0963	0.209	-0.4193	6	5	1	8	7	6	5	0	3	6	4	6	5	5657600	2288400	2685700	0	449030	3019200	647510	1916100	2549900	57110000	27352000	43582000	0	9517400	37278000	12963000	23989000	37982000	13	19213000	Tb927.11.5520	Tb927.11.5520_triosephosphate isomerase (TIM) | location=Tb927_11_v5.1:1567338-1568090(+) | length=250 | sequence_SO=chromosome | SO=protein_coding
Tb927.10.10960	heat shock protein 83, HSP83	Chaperone	0	0	0.42	0.4233	0.195	0.2432	23	27	11	44	41	27	32	3	5	23	18	19	25	21182000	7139400	12577000	287760	531910	4494800	3279600	3891700	8183500	623510000	251430000	402900000	10511000	18179000	177070000	128740000	146470000	272910000	33	61567000	Tb927.10.10960;Tb927.10.10950;Tb927.10.10940;Tb927.10.10920;Tb927.10.10900;Tb927.10.10890;Tb11.v5.0543;Tb927.10.10970;Tb927.10.10910;Tb927.10.10980;Tb927.10.10930	Tb927.10.10960_heat shock protein, putative | location=Tb927_10_v5.1:2674103-2676217(-) | length=704 | sequence_SO=chromosome | SO=protein_coding;Tb927.10.10950 | organism=Trypanosoma_brucei_TREU927 | product
Tb927.2.5160	chaperone DNAj, putative, J2	Chaperone	0	0	0.627	0.962	0.193	0.4883	2	2	1	10	7	2	7	0	0	2	1	2	3	1978300	310450	925760	0	0	227970	112100	143820	455490	25077000	6924500	21277000	0	0	8768000	0	6675400	12114000	20	4153900	Tb927.2.5160	Tb927.2.5160_chaperone protein DNAj, putative | location=Tb927_02_v5.1:910854-912056(+) | length=400 | sequence_SO=chromosome | SO=protein_coding
Tb927.11.15990	TbNup109 Outer ring	Nuclear.transport	1	2	2.54	2.8005	0.19	0.5002	0	3	1	11	9	3	7	0	0	0	0	0	0	481870	192990	558390	0	0	0	0	0	0	21532000	13270000	24393000	0	0	0	0	0	0	48	1233200	Tb927.11.15990	Tb927.11.15990_nucleoporin Nup109 (TbNup109) | location=Tb927_11_v5.1:4233647-4236652(-) | length=1001 | sequence_SO=chromosome | SO=protein_coding
Tb927.9.8410	chaperone protein DNAj, putative	Chaperone	0	0	5.82	-3.6166	0.181	-0.3945	8	2	1	16	10	2	9	0	4	8	15	15	16	5439800	2477800	5938800	0	811330	3375900	28193000	25614000	32414000	100290000	36279000	91636000	0	14675000	67182000	456270000	419800000	482100000	16	104270000	Tb927.9.8410	Tb927.9.8410_chaperone protein DNAj, putative | location=Tb927_09_v5.1:1371064-1372068(-) | length=334 | sequence_SO=chromosome | SO=protein_coding
Tb927.8.6390	lysophospholipase, putative,alpha/beta hydrolase, putative (TbLysoPLA)	Lipids	0	0	0.258	0.5511	0.181	-0.3585	3	2	1	6	5	2	3	0	0	3	1	1	3	1657800	274610	567640	0	0	453870	112780	167760	977850	21750000	7254400	9208200	0	0	7929400	0	0	12835000	15	4212400	Tb927.8.6390	Tb927.8.6390_lysophospholipase, putative,alpha/beta hydrolase, putative (TbLysoPLA) | location=Tb927_08_v5.1:1855921-1856763(+) | length=280 | sequence_SO=chromosome | SO=protein_coding
Tb927.10.3380	60S acidic ribosomal protein P2	Ribosome	0	0	0.528	-1.9545	0.181	0.7197	0	1	2	2	1	1	1	0	0	0	2	2	1	3811600	7639100	3644100	0	0	0	4349000	7978900	1973300	0	0	0	0	0	0	12479000	24505000	0	3	29396000	Tb927.10.3380;Tb927.10.3370	Tb927.10.3380_60S acidic ribosomal protein P2, putative | location=Tb927_10_v5.1:873629-873973(+) | length=114 | sequence_SO=chromosome | SO=protein_coding;Tb927.10.3370 | organism=Trypanosoma_brucei_TREU927
Tb927.3.1240	protein phosphatase 2A, putative	Protein.phosphatase	0	0	0.0942	0.0564	0.173	-0.4276	7	5	1	9	7	7	5	0	2	7	4	5	4	4714200	3551100	2592100	0	694500	3752500	1559400	1614700	1952400	64532000	51221000	39202000	0	16737000	50165000	24981000	25481000	34144000	15	20431000	Tb927.3.1240	Tb927.3.1240_protein phosphatase 2A, putative | location=Tb927_03_v5.1:309482-310453(+) | length=323 | sequence_SO=chromosome | SO=protein_coding
Tb927.9.15210	60S ribosomal protein L36	Ribosome	0	0	0.333	-1.3271	0.169	-0.5179	0	0	2	2	0	1	1	0	0	0	1	0	2	0	1640900	1772700	0	0	0	666700	0	9857700	0	0	0	0	0	0	0	0	19715000	2	13938000	Tb927.9.15210;Tb927.10.1590	Tb927.9.15210_ribosomal protein L36, putative | location=Tb927_09_v5.1:2362520-2362849(+) | length=109 | sequence_SO=chromosome | SO=protein_coding;Tb927.10.1590 | organism=Trypanosoma_brucei_TREU927 | produc
Tb927.10.6510	chaperonin HSP60, mitochondrial precursor	Mito.biogenesis	0	0	2.41	-1.9276	0.161	0.3437	18	12	2	33	19	12	26	2	6	18	27	22	28	8496500	3463100	11429000	57707	440590	4942300	15035000	10618000	23765000	313310000	146710000	381990000	2234000	14512000	178440000	469420000	348520000	719340000	33	78248000	Tb927.10.6510;Tb927.10.6400	Tb927.10.6510_chaperonin HSP60, mitochondrial precursor (HSP60) | location=Tb927_10_v5.1:1647814-1649502(+) | length=562 | sequence_SO=chromosome | SO=protein_coding;Tb927.10.6400 | organism=Trypanosoma_bruce
Tb927.6.3650	ARL3C	Cytoskeleton	0	0	1.48	-1.1457	0.16	-0.397	4	3	1	4	3	3	4	0	0	4	3	2	3	775620	665040	1522700	0	0	1151100	836580	592930	1382400	10219000	6962500	12938000	0	0	9809200	10918000	10533000	14812000	11	6926400	Tb927.6.3650	Tb927.6.3650_ADP-ribosylation factor, putative | location=Tb927_06_v5.1:1086752-1087303(-) | length=183 | sequence_SO=chromosome | SO=protein_coding
Tb927.11.9590	S-adenosylhomocysteine hydrolase, putative	Amino.acids	0	0	0.172	-0.2916	0.155	0.3814	6	4	1	12	10	4	7	0	0	6	3	6	7	4489500	426120	2127700	0	0	1094700	502290	1017900	1713800	71620000	14404000	40942000	0	0	25418000	14465000	21350000	39242000	20	11372000	Tb927.11.9590	Tb927.11.9590_S-adenosylhomocysteine hydrolase, putative | location=Tb927_11_v5.1:2610177-2611490(-) | length=437 | sequence_SO=chromosome | SO=protein_coding
Tb927.3.4030	hypothetical protein, conserved	Mito.pathway	0	2	0.775	1.8305	0.143	-0.4415	0	2	1	15	2	6	14	0	0	0	0	0	0	29686	173600	741770	0	0	0	0	0	0	2747000	10137000	41929000	0	0	0	0	0	0	58	945050	Tb927.3.4030	Tb927.3.4030_hypothetical protein, conserved | location=Tb927_03_v5.1:1135394-1139037(-) | length=1213 | sequence_SO=chromosome | SO=protein_coding
Tb927.5.2060	cell division control protein CDC5f, part of PRP19 complex	RNA.processing	1	2	0.104	-0.1977	0.142	0.284	0	4	1	11	9	6	4	0	0	0	3	7	0	715110	543970	214510	0	0	0	201350	436300	0	22325000	19899000	9794000	0	0	0	13652000	20891000	0	41	2111200	Tb927.5.2060	Tb927.5.2060_cell division control protein, putative | location=Tb927_05_v5.1:707612-709795(-) | length=727 | sequence_SO=chromosome | SO=protein_coding
Tb927.11.16130	nucleoside diphosphate kinase (NDPK)	Nucleotides	0	0	0.632	1.8387	0.139	0.4918	5	1	1	5	5	1	4	0	0	5	1	1	5	6950000	845680	5994400	0	0	2499500	365530	186070	3218900	60188000	0	47662000	0	0	29266000	0	0	30850000	9	20060000	Tb927.11.16130	Tb927.11.16130_nucleoside diphosphate kinase (NDPK) | location=Tb927_11_v5.1:4271767-4272228(-) | length=153 | sequence_SO=chromosome | SO=protein_coding
Tb927.10.14360	U2 small nuclear ribonucleoprotein 40K (U2_40K)	RNA.processing	0	2	0.382	-0.8909	0.137	0.3065	0	2	1	9	6	3	2	0	0	0	6	8	2	1342700	547170	284720	0	0	0	1507100	2658100	201570	21419000	15131000	7987600	0	0	0	20467000	36432000	0	16	6541300	Tb927.10.14360	Tb927.10.14360_U2 small nuclear ribonucleoprotein 40K (U2_40K) | location=Tb927_10_v5.1:3492521-3493498(-) | length=325 | sequence_SO=chromosome | SO=protein_coding
Tb927.3.2050	hypothetical protein, conserved, no domains, poly(Q) tracts, K-specific	Mito.DNA	1	2	0.634	1.4308	0.134	-0.451	0	2	1	11	10	6	2	0	0	0	1	0	0	609180	292650	43205	0	0	0	24619	0	0	32427000	26192000	0	0	0	0	0	0	0	65	969650	Tb927.3.2050	Tb927.3.2050_hypothetical protein, conserved | location=Tb927_03_v5.1:534244-538962(-) | length=1572 | sequence_SO=chromosome | SO=protein_coding
Tb927.2.5850	small nuclear ribonucleoprotein SmD2	RNA.processing	0	0	1.19	-2.2132	0.133	-0.3097	0	1	1	3	2	1	1	0	0	0	3	3	1	1718400	482540	396650	0	0	0	2417100	3565000	737590	14740000	0	0	0	0	0	15215000	16249000	0	6	9317300	Tb927.2.5850	Tb927.2.5850_small nuclear ribonucleoprotein SmD2 (Sm-D2) | location=Tb927_02_v5.1:1058716-1059083(+) | length=111 | sequence_SO=chromosome | SO=protein_coding
Tb10.v4.0033	PUF1	RNA.binding	0	0	5.01	-3.0054	0.128	-0.4487	19	11	3	30	14	11	14	0	9	19	23	22	24	2790500	2232600	3527300	0	1097100	4491600	16584000	11406000	15350000	107220000	97260000	132670000	0	43015000	119260000	512840000	311930000	392960000	30	57479000	Tb10.v4.0033;Tb927.10.4430;Tb11.v5.0767	Tb10.v4.0033_pumillo RNA binding protein PUF1,chrX additional, unordered contigs (PUF1) | location=TP3F6-6f06.p1k:4977-6695(-) | length=572 | sequence_SO=contig | SO=protein_coding;Tb927.10.4430 | organism=Tr
Tb927.10.3660	aspartate aminotransferase	Amino.acids	0	0	0.755	1.2714	0.116	0.2523	3	3	1	6	5	4	3	0	0	3	1	2	5	1776400	954870	1079700	0	0	665380	165360	255310	1029000	30785000	23357000	27792000	0	0	17726000	0	8896200	18181000	22	5926100	Tb927.10.3660	Tb927.10.3660_aspartate aminotransferase | location=Tb927_10_v5.1:952692-953903(-) | length=403 | sequence_SO=chromosome | SO=protein_coding
Tb927.8.6060	2-amino-3-ketobutyrate coenzyme A ligase, putative	Mito.pathway	0	0	1.05	1.353	0.111	-0.2347	2	1	1	5	2	1	5	0	0	2	1	1	1	382390	202210	845610	0	0	56247	74403	119890	148540	11263000	0	14524000	0	0	0	0	0	0	21	1829300	Tb927.8.6060	Tb927.8.6060_2-amino-3-ketobutyrate coenzyme A ligase, putative,glycine acetyltransferase, putative | location=Tb927_08_v5.1:1766401-1767660(+) | length=404 | sequence_SO=chromosome | SO=protein_coding
Tb927.11.8770	eIF4AIII or ATP-dependent RNA helicase FAL1	Nuclear.transport	0	2	0.184	-0.7498	0.111	0.3652	0	1	1	9	7	7	1	0	0	0	6	6	0	1910000	1521300	184910	0	0	0	1218100	1903000	0	31086000	27207000	0	0	0	0	27662000	41092000	0	20	6737300	Tb927.11.8770	Tb927.11.8770_ATP-dependent RNA helicase FAL1, putative | location=Tb927_11_v5.1:2410573-2411778(+) | length=401 | sequence_SO=chromosome | SO=protein_coding
Tb927.1.2550	histone H3	Chromatin	0	0	0.352	1.1636	0.107	0.3629	0	1	7	1	1	1	1	0	0	0	0	0	1	1128800	2877100	1370400	0	0	0	0	0	1003200	0	0	0	0	0	0	0	0	7022200	7	6379400	Tb927.1.2550;Tb927.1.2530;Tb927.1.2510;Tb927.1.2490;Tb927.1.2470;Tb927.1.2450;Tb927.1.2430	Tb927.1.2550_histone H3, putative | location=Tb927_01_v5.1:602011-602412(+) | length=133 | sequence_SO=chromosome | SO=protein_coding;Tb927.1.2530_histone H3, p
Tb927.11.13190	EF1 gamma, elongation factor 1 gamma, putative	Translation	0	0	0.137	0.3152	0.1	0.3118	4	2	2	12	10	2	7	0	0	4	2	3	5	2028800	204600	990750	0	0	342220	84335	167160	951300	36992000	15261000	19628000	0	0	11743000	6106600	6789600	22710000	25	4769200	Tb927.11.13190;Tb927.11.13090	Tb927.11.13190_elongation factor 1 gamma, putative | location=Tb927_11_v5.1:3538113-3539406(-) | length=404 | sequence_SO=chromosome | SO=protein_coding;Tb927.11.13090 | organism=Trypanosoma_brucei_TREU927 |
Tb927.2.6070	mitochondrial RNA binding complex 1 subunit (MRB6070)	Mito.RNA	0	2	1.22	2.2193	0.0919	0.2924	0	1	1	3	2	1	2	0	0	0	0	0	0	747380	460890	2329300	0	0	0	0	0	0	0	0	37269000	0	0	0	0	0	0	16	3537600	Tb927.2.6070	Tb927.2.6070_mitochondrial RNA binding complex 1 subunit (MRB6070) | location=Tb927_02_v5.1:1096360-1097217(+) | length=285 | sequence_SO=chromosome | SO=protein_coding
Tb927.6.1470	hypothetical protein, conserved, Arg-rich repeats	ZUnknown	0	2	0.0218	0.0864	0.0836	0.1744	0	1	1	6	3	1	2	0	0	0	0	0	5	939540	238050	455260	0	0	0	0	0	3423600	7335500	0	6241600	0	0	0	0	0	20152000	7	5056500	Tb927.6.1470	Tb927.6.1470_hypothetical protein, conserved | location=Tb927_06_v5.1:516753-517433(-) | length=223 | sequence_SO=chromosome | SO=protein_coding
Tb927.11.11830	40S ribosomal protein S17	Ribosome	0	0	1.46	-3.5591	0.0745	-0.2019	0	0	2	8	0	1	1	0	0	0	6	1	8	0	1143600	1089000	0	0	0	5388400	291160	12233000	0	8834400	0	0	0	0	32545000	0	71207000	6	20145000	Tb927.11.11830;Tb927.11.11820	Tb927.11.11830_40S ribosomal protein S17, putative | location=Tb927_11_v5.1:3173175-3173603(+) | length=142 | sequence_SO=chromosome | SO=protein_coding;Tb927.11.11820 | organism=Trypanosoma_brucei_TREU927 |
Tb927.6.4950	mago nashi-like protein, putative	Nuclear.transport	0	2	0.122	-0.2796	0.0735	-0.1798	0	1	1	2	1	2	2	0	0	0	1	2	0	427370	424790	448980	0	0	0	327780	663290	0	0	4662400	4266800	0	0	0	0	6441300	0	10	2292200	Tb927.6.4950	Tb927.6.4950_mago nashi-like protein, putative | location=Tb927_06_v5.1:1365488-1365931(+) | length=147 | sequence_SO=chromosome | SO=protein_coding
Tb927.10.7930	2,3-bisphosphoglycerate-independent phosphoglycerate mutase (PGAM)	Glucose.glycerol	0	0	0.0136	0.0588	0.0689	-0.2657	2	1	1	11	10	1	6	0	0	2	0	2	6	1727000	94843	1049000	0	0	133350	0	177090	641720	51002000	0	30647000	0	0	4633400	0	5960400	15875000	29	3823000	Tb927.10.7930	Tb927.10.7930_2,3-bisphosphoglycerate-independent phosphoglycerate mutase (PGAM) | location=Tb927_10_v5.1:1980455-1982110(-) | length=551 | sequence_SO=chromosome | SO=protein_coding
Tb927.11.3650	adenylosuccinate synthetase, putative	Nucleotides	0	0	0.0941	0.3982	0.0527	0.197	1	4	2	12	8	4	6	0	0	1	1	1	5	1236400	105900	559860	0	0	50470	27069	39569	376660	34288000	0	25774000	0	0	0	0	0	20337000	37	2396000	Tb927.11.3650;Tb11.v5.0435	Tb927.11.3650_adenylosuccinate synthetase, putative | location=Tb927_11_v5.1:1075346-1077154(+) | length=602 | sequence_SO=chromosome | SO=protein_coding;Tb11.v5.0435 | organism=Trypanosoma_brucei_TREU927 | p
Tb927.11.16030	proteasome regulatory non-ATP-ase subunit 7 (RPN7)	Ubiquitin.proteasome	0	0	1.22	2.9074	0.0489	0.2091	0	0	1	2	2	1	0	0	0	0	0	0	0	3451700	2321800	0	0	0	0	0	0	0	75936000	0	0	0	0	0	0	0	0	22	5773500	Tb927.11.16030	Tb927.11.16030_proteasome regulatory non-ATP-ase subunit 7 (RPN7) | location=Tb927_11_v5.1:4245726-4246925(-) | length=399 | sequence_SO=chromosome | SO=protein_coding
Tb927.3.3780	tryparedoxin	Redox	0	0	1.12	2.6983	0.0483	0.1801	1	0	2	5	4	0	3	0	0	1	0	0	1	3252800	0	2688800	0	0	607910	0	0	380860	28243000	0	25232000	0	0	0	0	0	0	9	6930300	Tb927.3.3780;Tb927.3.3760	Tb927.3.3780_tryparedoxin | location=Tb927_03_v5.1:1053583-1054017(+) | length=144 | sequence_SO=chromosome | SO=protein_coding;Tb927.3.3760_tryparedoxin (TRYP1
Tb927.2.3180	kinetoplast polyadenylation/uridylation factor 1 (KPAF1), PPR1	Mito.RNA	1	2	1.45	2.494	0.0419	0.1311	0	3	2	8	3	4	8	0	0	0	0	0	0	142850	241980	608830	0	0	0	0	0	0	16519000	15005000	21141000	0	0	0	0	0	0	53	993660	Tb927.2.3180;Tb11.v5.0782	Tb927.2.3180_kinetoplast polyadenylation/uridylation factor 1 (PPR1) | location=Tb927_02_v5.1:587698-590709(+) | length=1003 | sequence_SO=chromosome | SO=protein_coding;Tb11.v5.0782 | organism=Trypanosoma_br
Tb927.4.3590	EF1 beta, translation elongation factor 1-beta, putative	Translation	0	0	0.633	1.4218	0.0404	0.1119	1	1	2	6	6	1	3	0	0	1	0	1	2	2741100	272140	940890	0	0	210480	0	108670	521240	26707000	0	19157000	0	0	0	0	0	12980000	14	4794500	Tb927.4.3590;Tb927.4.3570	Tb927.4.3590_translation elongation factor 1-beta, putative | location=Tb927_04_v5.1:917073-917753(-) | length=226 | sequence_SO=chromosome | SO=protein_coding;Tb927.4.3570 | organism=Trypanosoma_brucei_TREU9
Tb927.1.3830	glucose-6-phosphate isomerase, glycosomal (PGI)	Glucose.glycerol	0	0	0.572	1.2524	0.0388	-0.1141	6	3	1	14	11	3	12	0	1	6	1	3	4	2956600	243010	2498400	0	65211	1056100	78094	341000	646590	77921000	12871000	55753000	0	0	30645000	0	14355000	25224000	28	7885000	Tb927.1.3830	Tb927.1.3830_glucose-6-phosphate isomerase, glycosomal (PGI) | location=Tb927_01_v5.1:816419-818242(+) | length=607 | sequence_SO=chromosome | SO=protein_coding
Tb927.6.5130	60S acidic ribosomal protein P2	Ribosome	0	0	0.413	-1.1364	0.0386	-0.1409	0	1	2	2	1	1	1	0	0	0	1	2	1	2103300	1670600	925340	0	0	0	846420	1295100	404770	0	0	0	0	0	0	0	6475700	0	5	7245500	Tb927.6.5130;Tb927.6.5120	Tb927.6.5130_60S acidic ribosomal protein P2, putative | location=Tb927_06_v5.1:1402395-1402772(+) | length=107 | sequence_SO=chromosome | SO=protein_coding;Tb927.6.5120 | organism=Trypanosoma_brucei_TREU927
Tb927.11.530	RBP3	RNA.binding	0	0	1.27	-1.0523	0.0321	0.137	9	8	1	12	9	8	10	0	7	9	10	9	9	35441000	35829000	46358000	0	18586000	30493000	50861000	32908000	54880000	397460000	308150000	380580000	0	174780000	271890000	423890000	303190000	488260000	9	305360000	Tb927.11.530	Tb927.11.530_RNA-binding protein, putative (RBP3) | location=Tb927_11_v5.1:132186-132788(-) | length=200 | sequence_SO=chromosome | SO=protein_coding
Tb927.9.8130	nascent polypeptide associated complex subunit	Translation	0	0	0.223	-0.5496	0.0255	-0.0708	0	1	2	3	1	1	1	0	0	0	2	2	1	1026500	639430	775910	0	0	0	810350	926960	178870	0	0	0	0	0	0	5672500	0	0	7	4358100	Tb927.9.8130;Tb927.9.8100	Tb927.9.8130_nascent polypeptide associated complex subunit, putative | location=Tb927_09_v5.1:1337494-1338060(-) | length=188 | sequence_SO=chromosome | SO=protein_coding;Tb927.9.8100 | organism=Trypanosoma_
Tb927.11.2300	ERF1 eukaryotic peptide chain release factor subunit 1, putative	Translation	0	2	0.0242	-0.0622	0.0193	-0.0317	0	2	1	6	4	2	3	0	0	0	4	2	1	418250	222440	387670	0	0	0	412250	380410	56790	13414000	8883500	7519600	0	0	0	8435600	10915000	0	27	1877800	Tb927.11.2300	Tb927.11.2300_eukaryotic peptide chain release factor subunit 1, putative (ERF1) | location=Tb927_11_v5.1:656382-657740(+) | length=452 | sequence_SO=chromosome | SO=protein_coding
Tb927.10.12710	heat shock protein, HSP110	Chaperone	0	0	0.197	0.5747	0.0179	-0.0577	6	3	1	17	15	3	13	0	1	6	3	2	8	1682700	152150	1222200	0	18551	279380	77554	64408	600030	48345000	12373000	58198000	0	0	15134000	9524500	8699700	27176000	44	4097000	Tb927.10.12710	Tb927.10.12710_heat shock protein 110, putative | location=Tb927_10_v5.1:3085110-3087545(-) | length=811 | sequence_SO=chromosome | SO=protein_coding
Tb927.11.4460	ALBA1	RNA.binding	0	0	0.598	-1.6847	0.0131	0.053	0	1	1	2	1	1	1	0	0	0	2	1	2	2161600	1297800	2003700	0	0	0	1410100	1548300	1229100	0	0	0	0	0	0	9988700	0	8485700	7	9650600	Tb927.11.4460	Tb927.11.4460_ALBA-Domain Protein (ALBA1) | location=Tb927_11_v5.1:1292887-1293264(+) | length=125 | sequence_SO=chromosome | SO=protein_coding
Tb927.10.1540	ZC3H30	RNA.binding	1	2	1.57	1.777	0.0117	0.0197	0	3	1	7	4	3	4	0	0	0	2	0	0	334310	250250	408590	0	0	0	86734	0	0	8275600	7725800	9820300	0	0	0	0	0	0	26	1079900	Tb927.10.1540	Tb927.10.1540_zinc finger protein family member, putative (ZC3H30) | location=Tb927_10_v5.1:420118-421812(-) | length=564 | sequence_SO=chromosome | SO=protein_coding
Tb927.6.3800	heat shock 70 kDa protein, mitochondrial precursor, putative	Mito.biogenesis	0	0	0.16	0.1362	0.0106	0.0208	15	16	3	23	18	17	16	0	3	15	13	12	12	5038600	2800100	3450400	0	418200	1592500	1521200	1480200	2082600	158840000	91855000	112170000	0	16593000	57674000	58209000	52133000	77577000	34	18384000	Tb927.6.3800;Tb927.6.3750;Tb927.6.3740	Tb927.6.3800_heat shock 70 kDa protein, mitochondrial precursor, putative | location=Tb927_06_v5.1:1126411-1128405(-) | length=657 | sequence_SO=chromosome | SO=protein_coding;Tb927.6.3750 | organism=Trypanos
Tb927.11.6440	hypothetical protein, conserved, Bromodomain and poly(Q), often in TAP MS, low similarity to coiled-coil proteins and hook proteins (cytoskeletal linkers)	ZUnknown	0	2	1.23	-1.4753	0.00753	0.02	0	1	1	5	4	3	1	0	0	0	3	3	2	656380	625710	99124	0	0	0	415160	308520	233390	9959300	10798000	0	0	0	0	10030000	6560600	7435700	20	2338300	Tb927.11.6440	Tb927.11.6440_hypothetical protein, conserved | location=Tb927_11_v5.1:1820426-1821751(-) | length=441 | sequence_SO=chromosome | SO=protein_coding

## Sheet: proteinGroups
Protein.IDs	Majority.protein.IDs	Peptide.counts..all.	Peptide.counts..razor.unique.	Peptide.counts..unique.	Fasta.headers	Number.of.proteins	Peptides	Razor...unique.peptides	Unique.peptides	Peptides.A	Peptides.B	Peptides.C	Peptides.D	Peptides.E	Peptides.F	Peptides.G	Peptides.H	Peptides.I	Razor...unique.peptides.A	Razor...unique.peptides.B	Razor...unique.peptides.C	Razor...unique.peptides.D	Razor...unique.peptides.E	Razor...unique.peptides.F	Razor...unique.peptides.G	Razor...unique.peptides.H	Razor...unique.peptides.I	Unique.peptides.A	Unique.peptides.B	Unique.peptides.C	Unique.peptides.D	Unique.peptides.E	Unique.peptides.F	Unique.peptides.G	Unique.peptides.H	Unique.peptides.I	Sequence.coverage....	Unique...razor.sequence.coverage....	Unique.sequence.coverage....	Mol..weight..kDa.	Sequence.length	Sequence.lengths	Fraction.average	Fraction.1	Q.value	Score	Sequence.coverage.A....	Sequence.coverage.B....	Sequence.coverage.C....
CON__ENSEMBL:ENSBTAP00000038253	CON__ENSEMBL:ENSBTAP00000038253	16	2	1		1	16	2	1	8	9	9	8	12	14	12	14	12	0	1	0	0	0	0	0	1	1	0	1	0	0	0	0	0	1	0	17.3	3.5	1.8	63.165	606	606	1	3	0.0016313	2.0054	10.7	12.5	10.7
CON__ENSEMBL:ENSP00000377550;CON__Q6IFU5	CON__ENSEMBL:ENSP00000377550	15;1	8;1	0;0		2	15	8	0	5	2	11	3	4	8	4	3	8	0	0	6	0	0	1	0	0	2	0	0	0	0	0	0	0	0	0	31.9	20.2	0	45.771	420	420;431	1	9	0	19.988	9	5.7	24.8
CON__O43790;CON__Q6NT21;CON__P78385;CON__Q14533	CON__O43790;CON__Q6NT21;CON__P78385;CON__Q14533	3;3;3;3	2;2;2;2	2;2;2;2	;;;	4	3	2	2	1	1	0	0	1	2	1	0	1	0	0	0	0	0	2	0	0	0	0	0	0	0	0	2	0	0	0	8.8	7.4	7.4	53.5	486	486;493;493;505	1	2	0	6.4783	1.4	1.4	0
CON__P00761	CON__P00761	3	3	3		1	3	3	3	3	3	3	2	3	3	3	3	3	3	3	3	2	3	3	3	3	3	3	3	3	2	3	3	3	3	3	16.5	16.5	16.5	24.409	231	231	1	31	0	14.735	16.5	16.5	16.5
CON__P01966	CON__P01966	8	8	8		1	8	8	8	3	2	4	0	2	3	8	7	7	3	2	4	0	2	3	8	7	7	3	2	4	0	2	3	8	7	7	57.7	57.7	57.7	15.184	142	142	1	56	0	130.21	37.3	26.1	45.1
CON__P02533;CON__Q9D312	CON__P02533	47;4	41;4	9;0		2	47	41	9	25	24	29	14	17	40	12	21	27	20	21	25	11	14	34	8	18	22	4	5	6	2	2	6	1	2	4	74.6	69.3	28	51.621	472	472;431	1	234	0	323.31	57.4	55.5	62.9
CON__P02538;CON__O95678;CON__Q8VED5	CON__P02538	57;18;12	4;1;1	3;0;0		3	57	4	3	20	19	37	16	24	53	21	22	32	0	1	2	1	1	3	1	1	1	0	1	2	1	1	2	1	1	1	67.4	7.4	7.4	60.044	564	564;551;531	1	12	0	69.744	32.4	34.6	55.9
CON__P02662	CON__P02662	9	9	9		1	9	9	9	7	7	7	6	6	6	5	7	6	7	7	7	6	6	6	5	7	6	7	7	7	6	6	6	5	7	6	43.7	43.7	43.7	22.975	199	199	1	73	0	119.49	42.2	39.7	39.7
CON__P02663	CON__P02663	6	6	6		1	6	6	6	4	3	5	2	2	4	4	3	5	4	3	5	2	2	4	4	3	5	4	3	5	2	2	4	4	3	5	30.9	30.9	30.9	24.348	207	207	1	32	0	11.377	19.3	14	27.5
CON__P02666	CON__P02666	3	3	3		1	3	3	3	1	1	2	1	1	1	1	2	1	1	1	2	1	1	1	1	2	1	1	1	2	1	1	1	1	2	1	16.3	16.3	16.3	23.583	209	209	1	34	0	34.841	9.1	9.1	12.4
CON__P02668	CON__P02668	3	3	3		1	3	3	3	3	1	3	2	2	2	1	2	2	3	1	3	2	2	2	1	2	2	3	1	3	2	2	2	1	2	2	23.1	23.1	23.1	18.974	169	169	1	20	0	93.924	23.1	5.9	23.1
CON__P02754	CON__P02754	8	8	8		1	8	8	8	3	2	5	3	4	4	2	2	3	3	2	5	3	4	4	2	2	3	3	2	5	3	4	4	2	2	3	61.7	61.7	61.7	18.281	162	162	1	33	0	78.167	25.9	21	51.9
CON__P02768-1	CON__P02768-1	11	7	7		1	11	7	7	9	3	6	1	2	3	1	2	2	7	1	2	0	1	1	0	0	0	7	1	2	0	1	1	0	0	0	21.2	16.1	16.1	69.366	609	609	1	12	0	11.339	19.7	5.9	8.4
CON__P02769	CON__P02769	37	37	33		1	37	37	33	26	22	34	9	5	22	16	13	23	26	22	34	9	5	22	16	13	23	24	20	30	8	4	20	15	11	21	68	68	62.9	69.293	607	607	1	195	0	252.83	52.6	44.8	62.4
CON__P04259	CON__P04259	55	4	4		1	55	4	4	19	18	36	14	22	51	19	21	31	0	0	1	0	0	4	0	0	1	0	0	1	0	0	4	0	0	1	67.4	7.4	7.4	59.998	564	564	1	7	0	129.48	29.4	31.6	54.3
CON__P04264	CON__P04264	72	67	52		1	72	67	52	46	45	49	41	59	65	49	56	54	44	43	46	39	56	60	46	52	51	34	34	35	31	44	46	34	40	39	74.5	72.7	62.7	66.017	644	644	1	745	0	323.31	62.4	62.4	62.7
CON__P07744	CON__P07744	10	2	1		1	10	2	1	5	3	4	0	4	6	4	3	7	1	0	0	0	0	0	0	0	2	1	0	0	0	0	0	0	0	1	14.5	5.7	3.6	56.283	525	525	1	3	0	3.6039	8.4	5.1	6.5
CON__P08727	CON__P08727	9	1	1		1	9	1	1	6	2	6	2	3	7	3	2	8	0	0	1	0	0	0	0	0	1	0	0	1	0	0	0	0	0	1	16.2	2.2	2.2	44.091	400	400	1	2	1	-2	9.2	4.5	12.2
CON__P08730-1	CON__P08730-1	9	1	1		1	9	1	1	6	2	7	3	4	8	5	3	7	0	0	1	0	0	0	0	0	0	0	0	1	0	0	0	0	0	0	14.9	4.3	4.3	47.754	437	437	1	1	1	-2	8	4.8	13.3
CON__P08779;CON__Q9Z2K1;CON__Q3ZAW8	CON__P08779	44;15;15	24;5;5	24;5;5		3	44	24	24	13	27	32	21	16	40	14	16	24	3	18	20	14	7	21	6	7	11	3	18	20	14	7	21	6	7	11	75.1	51.4	51.4	51.267	473	473;469;474	1	144	0	323.31	28.5	61.1	68.3
CON__P12763	CON__P12763	9	9	9		1	9	9	9	9	7	9	1	0	5	6	3	6	9	7	9	1	0	5	6	3	6	9	7	9	1	0	5	6	3	6	30.4	30.4	30.4	38.418	359	359	1	50	0	107.4	30.4	28.1	30.4
CON__P13645;CON__P02535-1;CON__Q7Z3Y7;CON__Q7Z3Y8;CON__Q148H6;CON__Q2M2I5;CON__P05784;CON__Q7Z3Z0;CON__Q99456;CON__A2AB72;CON__O76015;CON__O76013;CON__Q7Z3Y9;CON__O76014	CON__P13645	57;12;5;3;3;3;2;2;2;1;1;1;1;1	57;12;5;3;3;3;2;2;2;1;1;1;1;1	48;8;2;1;1;0;0;1;0;0;0;0;0;0		14	57	57	48	42	36	42	37	41	52	45	45	46	42	36	42	37	41	52	45	45	46	34	32	35	32	36	43	38	40	39	70.2	70.2	67.1	59.51	593	593;570;486;459;464;525;423;450;494;453;456;467;468;471	1	754	0	323.31	61.7	60.5	61
CON__P13646-1	CON__P13646-1	15	1	1		1	15	1	1	4	2	12	3	4	7	4	3	7	0	0	1	0	0	0	0	0	0	0	0	1	0	0	0	0	0	0	29.7	2	2	49.586	458	458	1	1	1	-2	6.8	5.2	24.7
CON__P13647;CON__P05787;CON__H-INV:HIT000016045;CON__Q9DCV7;CON__Q3KNV1;CON__P08729;CON__H-INV:HIT000292931;CON__Q9H552;CON__Q61726;CON__P78386	CON__P13647	49;8;4;4;4;4;3;3;1;1	27;0;0;0;0;0;0;0;0;0	8;0;0;0;0;0;0;0;0;0		10	49	27	8	23	22	31	13	23	46	25	27	31	11	13	18	7	11	26	13	16	17	3	4	5	2	3	8	3	4	5	54.4	33.6	12.5	62.378	590	590;483;99;457;469;469;443;499;479;507	1	174	0	323.31	32.9	36.1	45.6
CON__P19013	CON__P19013	9	5	4		1	9	5	4	1	1	3	1	1	2	1	1	7	0	0	1	0	0	0	0	0	4	0	0	1	0	0	0	0	0	3	17.2	10.8	8.8	63.91	594	594	1	5	0	19.093	1.5	1.5	5.6
CON__P20930	CON__P20930	4	4	4		1	4	4	4	1	1	1	0	3	0	0	1	0	1	1	1	0	3	0	0	1	0	1	1	1	0	3	0	0	1	0	4.3	4.3	4.3	435.16	4061	4061	1	7	0	7.7241	3.5	3.5	0.3
CON__P34955	CON__P34955	3	3	3		1	3	3	3	0	0	2	0	0	1	0	0	0	0	0	2	0	0	1	0	0	0	0	0	2	0	0	1	0	0	0	7.7	7.7	7.7	46.103	416	416	1	3	0	15.397	0	0	5.3
CON__P35527	CON__P35527	57	56	56		1	57	56	56	35	35	41	32	46	38	28	36	36	34	35	40	32	45	37	27	36	35	34	35	40	32	45	37	27	36	35	75.9	75.9	75.9	62.129	623	623	1	585	0	323.31	63.1	64.7	71.1
CON__P35908	CON__P35908	75	1	1		1	75	1	1	50	43	53	34	53	66	54	60	57	1	1	1	1	1	1	1	1	1	1	1	1	1	1	1	1	1	1	93.6	5.6	5.6	65.865	645	645	1	18	0	179.59	82	76.1	84.8
CON__P35908v2	CON__P35908v2	75	75	1		1	75	75	1	50	43	53	34	53	66	54	60	57	50	43	53	34	53	66	54	60	57	1	1	1	1	1	1	1	1	1	93.6	93.6	4.7	65.432	639	639	1	655	0	323.31	81.8	75.9	84.7
CON__P48668	CON__P48668	58	45	0		1	58	45	0	20	19	37	15	24	54	20	22	31	13	14	28	12	15	42	12	14	22	0	0	0	0	0	0	0	0	0	67.4	55.9	0	60.024	564	564	1	207	0	323.31	32.4	34.6	55.9
CON__Q04695;CON__P19001;CON__Q99PS0	CON__Q04695	42;6;1	24;1;1	9;1;0		3	42	24	9	10	8	21	8	8	37	5	9	14	1	1	11	3	0	20	1	0	4	1	1	4	2	0	7	0	0	2	69.7	50.9	23.6	48.105	432	432;403;422	1	56	0	323.31	19.7	18.3	48.6
CON__Q9UE12;CON__Q15323;CON__Q14525;CON__Q497I4;CON__Q9D646;CON__Q6NTB9;CON__O76009;CON__A2A5Y0;CON__Q92764;CON__Q14532;CON__REFSEQ:XP_986630	CON__Q9UE12;CON__Q15323;CON__Q14525;CON__Q497I4;CON__Q9D646;CON__Q6NTB9;CON__O76009;CON__A2A5Y0;CON__Q92764;CON__Q14532;CON__REFSEQ:XP_986630	4;4;3;3;2;2;2;2;2;2;2	2;2;1;1;2;1;1;1;1;1;1	1;1;0;0;1;0;0;1;0;0;1	;;;;;;;;;;	11	4	2	1	1	1	1	0	0	3	0	0	1	0	1	0	0	0	2	0	0	0	0	1	0	0	0	1	0	0	0	9.9	6.5	3.6	47.237	416	416;416;404;455;392;404;404;416;425;448;476	1	3	0	5.6797	1.7	3.6	1.7
CON__Q1RMK2	CON__Q1RMK2	3	3	3		1	3	3	3	1	1	1	2	0	3	0	0	0	1	1	1	2	0	3	0	0	0	1	1	1	2	0	3	0	0	0	7.9	7.9	7.9	65.056	597	597	1	8	0	13.456	1.7	1.7	1.7
CON__Q3SX09;CON__P02070	CON__Q3SX09	7;3	7;3	7;3		2	7	7	7	2	0	5	0	0	4	7	4	4	2	0	5	0	0	4	7	4	4	2	0	5	0	0	4	7	4	4	47.3	47.3	47.3	22.06	201	201;145	1	28	0	36.845	12.4	0	34.8
CON__Q3SZR3	CON__Q3SZR3	1	1	1		1	1	1	1	0	0	1	0	0	0	0	0	0	0	0	1	0	0	0	0	0	0	0	0	1	0	0	0	0	0	0	5.9	5.9	5.9	23.182	202	202	1	1	0	6.1022	0	0	5.9
CON__Q5D862	CON__Q5D862	11	11	11		1	11	11	11	3	3	4	1	6	5	3	8	4	3	3	4	1	6	5	3	8	4	3	3	4	1	6	5	3	8	4	11.9	11.9	11.9	248.07	2391	2391	1	39	0	56.008	1.8	1.8	2.3
CON__Q61782	CON__Q61782	7	1	1		1	7	1	1	1	1	2	0	3	7	0	1	4	0	0	0	0	0	1	0	0	0	0	0	0	0	0	1	0	0	0	47.3	10.8	10.8	10.662	93	93	1	1	1	-2	23.7	23.7	35.5
CON__Q6KB66-1;CON__Q0VBK2	CON__Q6KB66-1;CON__Q0VBK2	2;1	2;1	2;1	;	2	2	2	2	1	0	1	0	1	1	2	2	0	1	0	1	0	1	1	2	2	0	1	0	1	0	1	1	2	2	0	4.9	4.9	4.9	50.525	452	452;452	1	8	0.0016051	1.8946	2.2	0	2.2
CON__Q6NXH9	CON__Q6NXH9	7	1	1		1	7	1	1	5	3	5	1	3	4	3	4	5	0	0	1	0	0	0	0	1	0	0	0	1	0	0	0	0	1	0	11.5	2.2	2.2	58.911	539	539	1	2	0	3.2908	7.1	5.2	7.6
CON__Q8N1N4-2;CON__Q7RTT2	CON__Q8N1N4-2;CON__Q7RTT2	14;14	10;10	10;10	;	2	14	10	10	4	2	7	0	6	11	3	4	4	2	0	6	0	4	9	1	3	1	2	0	6	0	4	9	1	3	1	28.8	23	23	56.964	521	521;521	1	27	0	16.675	6.7	2.9	17.7
CON__Q7Z794	CON__Q7Z794	16	12	9		1	16	12	9	4	2	7	1	3	13	5	2	6	2	1	5	0	1	10	3	0	4	1	0	4	0	0	7	1	0	3	24.9	19.9	14.2	61.802	578	578	1	28	0	92.942	7.6	4.2	13.3
CON__Q86YZ3	CON__Q86YZ3	34	34	34		1	34	34	34	11	14	19	10	30	10	5	28	19	11	14	19	10	30	10	5	28	19	11	14	19	10	30	10	5	28	19	33.2	33.2	33.2	282.39	2850	2850	1	178	0	323.31	15.2	17.8	20.9
CON__Q9NSB4	CON__Q9NSB4	2	2	2		1	2	2	2	1	2	2	0	1	1	1	1	2	1	2	2	0	1	1	1	1	2	1	2	2	0	1	1	1	1	2	1.8	1.8	1.8	56.682	513	513	1	11	0	9.9519	1.8	1.8	1.8
CON__Q9U6Y5	CON__Q9U6Y5	19	19	19		1	19	19	19	0	0	0	16	16	17	0	0	0	0	0	0	16	16	17	0	0	0	0	0	0	16	16	17	0	0	0	68.7	68.7	68.7	28.106	249	249	1	135	0	323.31	0	0	0
REV__Tb927.1.1700	REV__Tb927.1.1700	1	1	1	Tb927.1.1700 | organism=Trypanosoma_brucei_TREU927 | product=hypothetical protein, conserved | location=Tb927_01_v5.1:428873-430357(+) | length=493 | sequence_SO=chromosome | SO=protein_coding	1	1	1	1	0	0	0	0	0	0	0	0	1	0	0	0	0	0	0	0	0	1	0	0	0	0	0	0	0	0	1	0	0	0	55.093	493	493	1	1	0.0061633	1.5965	0	0	0
REV__Tb927.10.5910	REV__Tb927.10.5910	1	1	1	Tb927.10.5910 | organism=Trypanosoma_brucei_TREU927 | product=hypothetical protein, conserved | location=Tb927_10_v5.1:1479530-1481800(-) | length=756 | sequence_SO=chromosome | SO=protein_coding	1	1	1	1	0	0	0	1	0	1	0	0	0	0	0	0	1	0	1	0	0	0	0	0	0	1	0	1	0	0	0	0	0	0	85.801	756	756	1	2	1	-2	0	0	0
REV__Tb927.10.7280	REV__Tb927.10.7280	1	1	1	Tb927.10.7280 | organism=Trypanosoma_brucei_TREU927 | product=pre-mRNA splicing factor ATP-dependent RNA helicase, putative,RNA helicase, putative | location=Tb927_10_v5.1:1833351-1836539(-) | length=1062 | sequence_SO=chromosome | SO=protein_coding	1	1	1	1	0	0	0	0	0	0	0	1	1	0	0	0	0	0	0	0	1	1	0	0	0	0	0	0	0	1	1	0	0	0	121.24	1062	1062	1	2	1	-2	0	0	0
REV__Tb927.11.16890	REV__Tb927.11.16890	1	1	1	Tb927.11.16890 | organism=Trypanosoma_brucei_TREU927 | product=hypothetical protein, conserved | location=Tb927_11_v5.1:4497532-4503711(-) | length=2059 | sequence_SO=chromosome | SO=protein_coding	1	1	1	1	0	0	0	1	0	0	1	0	1	0	0	0	1	0	0	1	0	1	0	0	0	1	0	0	1	0	1	0	0	0	228.84	2059	2059	1	3	1	-2	0	0	0
REV__Tb927.11.17990	REV__Tb927.11.17990	1	1	1	Tb927.11.17990 | organism=Trypanosoma_brucei_TREU927 | product=hypothetical protein, conserved, point mutation | location=Tb927_11_v5.1:4872257-4873204(-) | length=315 | sequence_SO=chromosome | SO=protein_coding	1	1	1	1	0	0	1	0	0	1	0	0	0	0	0	1	0	0	1	0	0	0	0	0	1	0	0	1	0	0	0	0	0	0	37.271	315	315	1	3	1	-2	0	0	0
REV__Tb927.2.5270	REV__Tb927.2.5270	1	1	1	Tb927.2.5270 | organism=Trypanosoma_brucei_TREU927 | product=dynein heavy chain, putative | location=Tb927_02_v5.1:925431-938171(+) | length=4246 | sequence_SO=chromosome | SO=protein_coding	1	1	1	1	1	1	1	0	0	0	1	0	0	1	1	1	0	0	0	1	0	0	1	1	1	0	0	0	1	0	0	0	0	0	485.74	4246	4246	1	5	0.0016835	2.2019	0	0	0
REV__Tb927.5.270	REV__Tb927.5.270	1	1	1	Tb927.5.270 | organism=Trypanosoma_brucei_TREU927 | product=variant surface glycoprotein (VSG, pseudogene), putative,variant surface glycoprotein, interrupted | location=Tb927_05_v5.1:58707-59810(+) | length=368 | sequence_SO=chromosome | SO=protein_coding	1	1	1	1	1	1	1	1	1	1	1	1	1	1	1	1	1	1	1	1	1	1	1	1	1	1	1	1	1	1	1	0	0	0	38.792	368	368	1	9	0.0076923	1.5599	0	0	0
REV__Tb927.6.1760	REV__Tb927.6.1760	1	1	1	Tb927.6.1760 | organism=Trypanosoma_brucei_TREU927 | product=KU80 protein (KU80) | location=Tb927_06_v5.1:587760-589667(-) | length=635 | sequence_SO=chromosome | SO=protein_coding	1	1	1	1	0	0	1	0	0	0	0	1	1	0	0	1	0	0	0	0	1	1	0	0	1	0	0	0	0	1	1	0	0	0	69.297	635	635	1	3	1	-2	0	0	0
REV__Tb927.7.4110	REV__Tb927.7.4110	1	1	1	Tb927.7.4110 | organism=Trypanosoma_brucei_TREU927 | product=kinesin, putative | location=Tb927_07_v5.1:1088499-1091183(+) | length=894 | sequence_SO=chromosome | SO=protein_coding	1	1	1	1	1	0	0	0	1	0	1	0	1	1	0	0	0	1	0	1	0	1	1	0	0	0	1	0	1	0	1	0	0	0	95.104	894	894	1	4	0.0047847	1.8546	0	0	0
REV__Tb927.7.6080;REV__Tb927.7.6070;REV__Tb927.7.6040;REV__Tb927.7.6050;REV__Tb927.7.6060	REV__Tb927.7.6080;REV__Tb927.7.6070;REV__Tb927.7.6040;REV__Tb927.7.6050;REV__Tb927.7.6060	1;1;1;1;1	1;1;1;1;1	1;1;1;1;1	Tb927.7.6080 | organism=Trypanosoma_brucei_TREU927 | product=receptor-type adenylate cyclase GRESAG 4, putative | location=Tb927_07_v5.1:1650477-1655389(-) | length=1170 | sequence_SO=chromosome | SO=protein_coding;Tb927.7.6070 | organism=Trypanosoma_bruce	5	1	1	1	0	1	0	0	0	0	0	0	0	0	1	0	0	0	0	0	0	0	0	1	0	0	0	0	0	0	0	0	0	0	129.12	1170	1170;1267;1267;1269;1270	1	1	0.0032	1.8776	0	0	0
REV__Tb927.8.460	REV__Tb927.8.460	1	1	1	Tb927.8.460 | organism=Trypanosoma_brucei_TREU927 | product=variant surface glycoprotein (VSG, atypical), putative | location=Tb927_08_v5.1:125412-126989(+) | length=525 | sequence_SO=chromosome | SO=protein_coding	1	1	1	1	0	0	0	1	1	1	0	0	0	0	0	0	1	1	1	0	0	0	0	0	0	1	1	1	0	0	0	0	0	0	56.4	525	525	1	3	0.0092308	1.5529	0	0	0
REV__Tb927.9.11640	REV__Tb927.9.11640	1	1	1	Tb927.9.11640 | organism=Trypanosoma_brucei_TREU927 | product=hypothetical protein, conserved | location=Tb927_09_v5.1:1809972-1810712(+) | length=246 | sequence_SO=chromosome | SO=protein_coding	1	1	1	1	0	0	0	0	1	0	0	0	0	0	0	0	0	1	0	0	0	0	0	0	0	0	1	0	0	0	0	0	0	0	26.958	246	246	1	1	1	-2	0	0	0
REV__Tb927.9.5620	REV__Tb927.9.5620	1	1	1	Tb927.9.5620 | organism=Trypanosoma_brucei_TREU927 | product=hypothetical protein, conserved | location=Tb927_09_v5.1:965768-969808(+) | length=1346 | sequence_SO=chromosome | SO=protein_coding	1	1	1	1	1	1	0	0	0	0	0	0	0	1	1	0	0	0	0	0	0	0	1	1	0	0	0	0	0	0	0	0	0	0	149.28	1346	1346	1	3	1	-2	0	0	0
Tb11.v5.0866;Tb927.5.4460;Tb05.5K5.110	Tb11.v5.0866;Tb927.5.4460;Tb05.5K5.110	1;1;1	1;1;1	1;1;1	Tb11.v5.0866 | organism=Trypanosoma_brucei_TREU927 | product=major vault protein, putative | location=Tb927_11_bin_v5.1:4524831-4526390(-) | length=519 | sequence_SO=random_sequence | SO=protein_coding;Tb927.5.4460 | organism=Trypanosoma_brucei_TREU927 | p	3	1	1	1	0	0	0	1	1	1	0	0	0	0	0	0	1	1	1	0	0	0	0	0	0	1	1	1	0	0	0	5.2	5.2	5.2	58.007	519	519;838;838	1	3	0	3.1612	0	0	0
Tb927.5.4500;Tb05.5K5.150	Tb927.5.4500;Tb05.5K5.150	7;7	7;7	7;7	Tb927.5.4500 | organism=Trypanosoma_brucei_TREU927 | product=ras-like small GTPase, putative (TbSAR1) | location=Tb927_05_v5.1:1383483-1384100(-) | length=194 | sequence_SO=chromosome | SO=protein_coding;Tb05.5K5.150 | organism=Trypanosoma_brucei_TREU927 |	2	7	7	7	3	1	5	0	2	3	3	3	4	3	1	5	0	2	3	3	3	4	3	1	5	0	2	3	3	3	4	54.1	54.1	54.1	21.771	194	194;194	1	26	0	19.117	23.7	10.3	44.3
Tb927.5.4560;Tb11.v5.0409;Tb05.5K5.200	Tb927.5.4560;Tb11.v5.0409;Tb05.5K5.200	2;2;2	2;2;2	2;2;2	Tb927.5.4560 | organism=Trypanosoma_brucei_TREU927 | product=guanine deaminase, putative,guanase, putative,guanine aminase, putative,guanine aminohydrolase, putative | location=Tb927_05_v5.1:1410838-1412388(+) | length=516 | sequence_SO=chromosome | SO=pro	3	2	2	2	2	0	0	0	0	1	0	0	1	2	0	0	0	0	1	0	0	1	2	0	0	0	0	1	0	0	1	6.6	6.6	6.6	55.321	516	516;516;516	1	4	0	2.913	6.6	0	0
Tb927.7.2140;Tb07.11L3.90	Tb927.7.2140;Tb07.11L3.90	5;5	5;5	5;5	Tb927.7.2140 | organism=Trypanosoma_brucei_TREU927 | product=hypothetical protein,zinc finger protein family member, putative (ZC3H18) | location=Tb927_07_v5.1:544639-545769(-) | length=376 | sequence_SO=chromosome | SO=protein_coding;Tb07.11L3.90 | organi	2	5	5	5	0	0	3	0	0	0	5	2	4	0	0	3	0	0	0	5	2	4	0	0	3	0	0	0	5	2	4	20.5	20.5	20.5	40.864	376	376;376	1	18	0	64.859	0	0	10.9
Tb08.27P2.160;Tb11.0700;Tb927.9.620;Tb10.v4.0147;Tb08.27P2.520;Tb927.11.19900;Tb927.3.430;Tb10.v4.0101;Tb09.v4.0172;Tb927.11.20150;Tb927.11.17180;Tb927.1.5340	Tb08.27P2.160;Tb11.0700;Tb927.9.620;Tb10.v4.0147;Tb08.27P2.520;Tb927.11.19900	3;2;2;2;2;2;1;1;1;1;1;1	3;2;2;2;2;2;1;1;1;1;1;1	1;0;0;0;0;0;0;1;0;0;0;0	Tb08.27P2.160 | organism=Trypanosoma_brucei_TREU927 | product=expression site-associated gene (ESAG, pseudogene), putative,expression site-associated gene 3 (ESAG3), degenerate,BAC from homologous region on chr8 | location=Tbrucei.chr8.100:22974-24068(-) |	12	3	3	1	0	0	0	0	0	1	3	2	2	0	0	0	0	0	1	3	2	2	0	0	0	0	0	0	1	1	1	7.7	7.7	4.7	41.846	364	364;187;231;290;341;358;209;224;322;326;338;349	1	13	0	36.798	0	0	0
Tb09.v4.0154	Tb09.v4.0154	2	2	1	Tb09.v4.0154 | organism=Trypanosoma_brucei_TREU927 | product=expression site-associated gene (ESAG, pseudogene), putative,expression site-associated gene 3 (ESAG3, pseudogene), putative,chrIX additional, unordered contigs | location=tryp_IXb-314f06.q1c:276	1	2	2	1	0	0	0	0	0	0	1	2	0	0	0	0	0	0	0	1	2	0	0	0	0	0	0	0	1	1	0	8	8	5.2	40.514	364	364	1	4	0	2.6555	0	0	0
Tb10.v4.0033;Tb927.10.4430;Tb11.v5.0767	Tb10.v4.0033;Tb927.10.4430;Tb11.v5.0767	30;30;23	30;30;23	30;30;23	Tb10.v4.0033 | organism=Trypanosoma_brucei_TREU927 | product=pumillo RNA binding protein PUF1,chrX additional, unordered contigs (PUF1) | location=TP3F6-6f06.p1k:4977-6695(-) | length=572 | sequence_SO=contig | SO=protein_coding;Tb927.10.4430 | organism=Tr	3	30	30	30	14	11	14	0	9	19	23	22	24	14	11	14	0	9	19	23	22	24	14	11	14	0	9	19	23	22	24	61.9	61.9	61.9	63.851	572	572;572;503	1	189	0	323.31	40	35	40
Tb10.v4.0053;Tb10.v4.0052;Tb927.10.10360;Tb927.10.10280	Tb10.v4.0053;Tb10.v4.0052;Tb927.10.10360;Tb927.10.10280	7;7;6;5	7;7;6;5	7;7;6;5	Tb10.v4.0053 | organism=Trypanosoma_brucei_TREU927 | product=hypothetical protein,chrX additional, unordered contigs | location=tryp_X-106b08.p1c:1-12357(-) | length=4119 | sequence_SO=contig | SO=protein_coding;Tb10.v4.0052 | organism=Trypanosoma_brucei_T	4	7	7	7	7	5	6	1	2	4	6	4	5	7	5	6	1	2	4	6	4	5	7	5	6	1	2	4	6	4	5	73.4	73.4	73.4	483.8	4119	4119;4880;3198;2371	1	53	0	141.52	73.4	62.5	63.8
Tb11.v5.0537;Tb927.11.9920;Tb11.01.1680.v5	Tb11.v5.0537;Tb927.11.9920;Tb11.01.1680.v5	7;7;7	7;7;7	7;7;7	Tb11.v5.0537 | organism=Trypanosoma_brucei_TREU927 | product=polyubiquitin, putative | location=Tb927_11_bin_v5.1:2333410-2335281(+) | length=623 | sequence_SO=random_sequence | SO=protein_coding;Tb927.11.9920 | organism=Trypanosoma_brucei_TREU927 | produc	3	7	7	7	3	2	2	3	7	4	2	2	2	3	2	2	3	7	4	2	2	2	3	2	2	3	7	4	2	2	2	56.2	56.2	56.2	70.128	623	623;685;1283	1	33	0	151.99	32.7	17.3	24.1
Tb927.11.7214;Tb11.02.5100b	Tb927.11.7214;Tb11.02.5100b	1;1	1;1	1;1	Tb927.11.7214 | organism=Trypanosoma_brucei_TREU927 | product=hypothetical protein, conserved | location=Tb927_11_v5.1:2028720-2030391(+) | length=553 | sequence_SO=chromosome | SO=protein_coding;Tb11.02.5100b | organism=Trypanosoma_brucei_TREU927 | produc	2	1	1	1	0	0	0	0	0	1	0	0	0	0	0	0	0	0	1	0	0	0	0	0	0	0	0	1	0	0	0	3.4	3.4	3.4	63.574	553	553;553	1	1	1	-2	0	0	0
Tb927.11.7218;Tb11.02.5120b	Tb927.11.7218;Tb11.02.5120b	10;10	10;10	10;10	Tb927.11.7218 | organism=Trypanosoma_brucei_TREU927 | product=mitochondrial edited mRNA stability factor 1 subunit | location=Tb927_11_v5.1:2032952-2035792(+) | length=946 | sequence_SO=chromosome | SO=protein_coding;Tb11.02.5120b | organism=Trypanosoma_br	2	10	10	10	3	5	10	0	0	0	0	0	0	3	5	10	0	0	0	0	0	0	3	5	10	0	0	0	0	0	0	15.2	15.2	15.2	104.09	946	946;946	1	19	0	43.332	4.7	9.3	15.2
Tb11.02.5390b;Tb11.02.5390	Tb11.02.5390b;Tb11.02.5390	36;36	36;36	36;36	Tb11.02.5390b | organism=Trypanosoma_brucei_TREU927 | product=mRNA processing protein, putative | location=Tb927_11_bin_v5.1:653545-656808(+) | length=1087 | sequence_SO=random_sequence | SO=protein_coding;Tb11.02.5390 | organism=Trypanosoma_brucei_TREU927	2	36	36	36	25	28	33	0	0	0	0	0	0	25	28	33	0	0	0	0	0	0	25	28	33	0	0	0	0	0	0	40	40	40	120.71	1087	1087;1087	1	95	0	268.74	30.5	33	37.4
Tb927.6.4980;Tb11.0390;Tb11.0290	Tb927.6.4980;Tb11.0390;Tb11.0290	8;8;8	8;8;8	8;8;8	Tb927.6.4980 | organism=Trypanosoma_brucei_TREU927 | product=40S ribosomal protein S14 (RPS14) | location=Tb927_06_v5.1:1370202-1370673(+) | length=144 | sequence_SO=chromosome | SO=protein_coding;Tb11.0390 | organism=Trypanosoma_brucei_TREU927 | product=4	3	8	8	8	5	4	6	0	1	0	6	4	6	5	4	6	0	1	0	6	4	6	5	4	6	0	1	0	6	4	6	49.3	49.3	49.3	15.513	144	144;144;144	1	48	0	45.812	41	27.8	36.1
Tb927.10.1140;Tb11.0530	Tb927.10.1140;Tb11.0530	2;2	2;2	2;2	Tb927.10.1140 | organism=Trypanosoma_brucei_TREU927 | product=epsilon tubulin (TUBE1) | location=Tb927_10_v5.1:305279-306742(-) | length=487 | sequence_SO=chromosome | SO=protein_coding;Tb11.0530 | organism=Trypanosoma_brucei_TREU927 | product=chrX additio	2	2	2	2	0	0	0	1	1	0	1	0	1	0	0	0	1	1	0	1	0	1	0	0	0	1	1	0	1	0	1	7	7	7	53.167	487	487;487	1	4	0	2.3716	0	0	0
Tb11.0840;Tb927.11.720	Tb11.0840;Tb927.11.720	2;2	2;2	2;2	Tb11.0840 | organism=Trypanosoma_brucei_TREU927 | product=hypothetical protein,chrXI additional, unordered contigs | location=tryp_XI-147f01.q1ca:1458-2243(+) | length=261 | sequence_SO=contig | SO=protein_coding;Tb927.11.720 | organism=Trypanosoma_brucei_	2	2	2	2	1	1	1	0	0	0	1	0	0	1	1	1	0	0	0	1	0	0	1	1	1	0	0	0	1	0	0	16.9	16.9	16.9	29.807	261	261;264	1	4	0	4.5486	5	5	11.9
Tb927.11.18680;Tb11.0845	Tb927.11.18680;Tb11.0845	1;1	1;1	1;1	Tb927.11.18680 | organism=Trypanosoma_brucei_TREU927 | product=dynein light chain LC8, putative (DYNLL1) | location=Tb927_11_Homologues_1_v5.1:993-1265(-) | length=90 | sequence_SO=chromosome | SO=protein_coding;Tb11.0845 | organism=Trypanosoma_brucei_TREU	2	1	1	1	0	0	0	0	0	1	0	0	0	0	0	0	0	0	1	0	0	0	0	0	0	0	0	1	0	0	0	24.4	24.4	24.4	10.429	90	90;90	1	2	0.0016393	2.0746	0	0	0
Tb927.4.1100;Tb927.11.680;Tb11.0880	Tb927.4.1100;Tb927.11.680;Tb11.0880	3;3;3	3;3;3	3;3;3	Tb927.4.1100 | organism=Trypanosoma_brucei_TREU927 | product=ribosomal protein L21E (60S), putative | location=Tb927_04_v5.1:292933-293412(-) | length=159 | sequence_SO=chromosome | SO=protein_coding;Tb927.11.680 | organism=Trypanosoma_brucei_TREU927 | pro	3	3	3	3	0	0	0	0	0	0	0	0	3	0	0	0	0	0	0	0	0	3	0	0	0	0	0	0	0	0	3	22	22	22	18.015	159	159;159;159	1	3	0	4.6261	0	0	0
Tb927.11.1840;Tb11.1380	Tb927.11.1840;Tb11.1380	2;2	2;2	2;2	Tb927.11.1840 | organism=Trypanosoma_brucei_TREU927 | product=hypothetical protein, conserved | location=Tb927_11_v5.1:546579-547778(-) | length=399 | sequence_SO=chromosome | SO=protein_coding;Tb11.1380 | organism=Trypanosoma_brucei_TREU927 | product=hypo	2	2	2	2	2	1	0	0	0	0	0	0	0	2	1	0	0	0	0	0	0	0	2	1	0	0	0	0	0	0	0	7	7	7	45.633	399	399;399	1	3	0	2.6854	7	3.3	0
Tb927.7.4790;Tb11.v5.0162	Tb927.7.4790;Tb11.v5.0162	3;3	3;3	3;3	Tb927.7.4790 | organism=Trypanosoma_brucei_TREU927 | product=proteasome beta 6 subunit,20S proteasome beta 6 subunit, putative (BETA6) | location=Tb927_07_v5.1:1266772-1267570(-) | length=258 | sequence_SO=chromosome | SO=protein_coding;Tb11.v5.0162 | orga	2	3	3	3	0	0	0	0	0	0	2	0	3	0	0	0	0	0	0	2	0	3	0	0	0	0	0	0	2	0	3	15.1	15.1	15.1	28.691	258	258;258	1	5	0	4.5892	0	0	0
Tb927.7.4810;Tb11.v5.0163	Tb927.7.4810;Tb11.v5.0163	3;3	3;3	3;3	Tb927.7.4810 | organism=Trypanosoma_brucei_TREU927 | product=hypothetical protein, conserved | location=Tb927_07_v5.1:1268543-1269919(-) | length=458 | sequence_SO=chromosome | SO=protein_coding;Tb11.v5.0163 | organism=Trypanosoma_brucei_TREU927 | product=	2	3	3	3	0	0	0	0	1	2	0	0	0	0	0	0	0	1	2	0	0	0	0	0	0	0	1	2	0	0	0	9.8	9.8	9.8	52.176	458	458;458	1	3	0	4.9794	0	0	0
Tb927.7.5020;Tb927.7.5000;Tb11.v5.0182;Tb11.v5.0181	Tb927.7.5020;Tb927.7.5000;Tb11.v5.0182;Tb11.v5.0181	4;4;4;4	4;4;4;4	4;4;4;4	Tb927.7.5020 | organism=Trypanosoma_brucei_TREU927 | product=60S ribosomal protein L19, putative | location=Tb927_07_v5.1:1325590-1326372(+) | length=260 | sequence_SO=chromosome | SO=protein_coding;Tb927.7.5000 | organism=Trypanosoma_brucei_TREU927 | prod	4	4	4	4	0	0	0	0	0	0	0	0	4	0	0	0	0	0	0	0	0	4	0	0	0	0	0	0	0	0	4	12.3	12.3	12.3	29.408	260	260;260;260;260	1	4	0	6.0516	0	0	0
Tb11.v5.0199;Tb927.10.6060;Tb927.10.6070	Tb11.v5.0199;Tb927.10.6060	7;7;1	7;7;1	7;7;1	Tb11.v5.0199 | organism=Trypanosoma_brucei_TREU927 | product=universal minicircle sequence binding protein, putative | location=Tb927_11_bin_v5.1:298828-299469(-) | length=213 | sequence_SO=random_sequence | SO=protein_coding;Tb927.10.6060 | organism=Trypa	3	7	7	7	6	5	6	0	0	0	0	0	0	6	5	6	0	0	0	0	0	0	6	5	6	0	0	0	0	0	0	48.4	48.4	48.4	21.836	213	213;213;140	1	26	0	62.083	42.3	38	42.3
Tb927.10.5340;Tb927.10.5330;Tb11.v5.1060;Tb11.v5.0243	Tb927.10.5340;Tb927.10.5330;Tb11.v5.1060;Tb11.v5.0243	8;8;8;8	8;8;8;8	8;8;8;8	Tb927.10.5340 | organism=Trypanosoma_brucei_TREU927 | product=40S ribosomal protein S18, putative (RPS18) | location=Tb927_10_v5.1:1333758-1334219(+) | length=153 | sequence_SO=chromosome | SO=protein_coding;Tb927.10.5330 | organism=Trypanosoma_brucei_TREU	4	8	8	8	0	0	0	0	0	0	0	0	8	0	0	0	0	0	0	0	0	8	0	0	0	0	0	0	0	0	8	45.8	45.8	45.8	17.51	153	153;153;153;153	1	11	0	176.95	0	0	0
Tb927.7.4500;Tb11.v5.0263	Tb927.7.4500;Tb11.v5.0263	4;4	4;4	4;4	Tb927.7.4500 | organism=Trypanosoma_brucei_TREU927 | product=hypothetical protein, conserved | location=Tb927_07_v5.1:1198019-1199605(-) | length=528 | sequence_SO=chromosome | SO=protein_coding;Tb11.v5.0263 | organism=Trypanosoma_brucei_TREU927 | product=	2	4	4	4	2	2	2	0	0	4	2	1	3	2	2	2	0	0	4	2	1	3	2	2	2	0	0	4	2	1	3	10.8	10.8	10.8	58.428	528	528;528	1	21	0	9.0705	5.9	5.9	5.9
Tb927.7.4520;Tb11.v5.0265	Tb927.7.4520;Tb11.v5.0265	5;5	5;5	5;5	Tb927.7.4520 | organism=Trypanosoma_brucei_TREU927 | product=hypothetical protein, conserved | location=Tb927_07_v5.1:1203703-1204308(-) | length=201 | sequence_SO=chromosome | SO=protein_coding;Tb11.v5.0265 | organism=Trypanosoma_brucei_TREU927 | product=	2	5	5	5	4	1	2	0	0	4	1	3	4	4	1	2	0	0	4	1	3	4	4	1	2	0	0	4	1	3	4	26.9	26.9	26.9	22.315	201	201;201	1	19	0	11.167	19.4	6	11.9
Tb927.7.4540;Tb11.v5.0267	Tb927.7.4540;Tb11.v5.0267	1;1	1;1	1;1	Tb927.7.4540 | organism=Trypanosoma_brucei_TREU927 | product=hypothetical protein, conserved | location=Tb927_07_v5.1:1207968-1208903(-) | length=311 | sequence_SO=chromosome | SO=protein_coding;Tb11.v5.0267 | organism=Trypanosoma_brucei_TREU927 | product=	2	1	1	1	0	0	1	0	0	0	1	1	1	0	0	1	0	0	0	1	1	1	0	0	1	0	0	0	1	1	1	2.3	2.3	2.3	34.52	311	311;311	1	4	1	-2	0	0	2.3
Tb927.7.4550;Tb11.v5.0268	Tb927.7.4550;Tb11.v5.0268	2;2	2;2	2;2	Tb927.7.4550 | organism=Trypanosoma_brucei_TREU927 | product=60S ribosomal protein-like | location=Tb927_07_v5.1:1209651-1210720(-) | length=183 | sequence_SO=chromosome | SO=protein_coding;Tb11.v5.0268 | organism=Trypanosoma_brucei_TREU927 | product=60S r	2	2	2	2	0	2	0	0	0	0	0	0	0	0	2	0	0	0	0	0	0	0	0	2	0	0	0	0	0	0	0	27.3	27.3	27.3	19.423	183	183;183	1	2	0	4.012	0	27.3	0
Tb927.7.4570;Tb11.v5.0270	Tb927.7.4570;Tb11.v5.0270	1;1	1;1	1;1	Tb927.7.4570 | organism=Trypanosoma_brucei_TREU927 | product=inosine-guanine nucleoside hydrolase (IG-NH) | location=Tb927_07_v5.1:1214602-1215675(-) | length=357 | sequence_SO=chromosome | SO=protein_coding;Tb11.v5.0270 | organism=Trypanosoma_brucei_TREU9	2	1	1	1	1	0	1	0	0	1	0	0	1	1	0	1	0	0	1	0	0	1	1	0	1	0	0	1	0	0	1	3.6	3.6	3.6	39.39	357	357;357	1	4	0	6.07	3.6	0	3.6
Tb927.10.8440;Tb11.v5.0330;Tb11.v5.0333;Tb927.10.8480;Tb927.10.8470;Tb927.10.8460;Tb11.v5.0309;Tb11.v5.0308;Tb11.v5.0307;Tb927.10.8530;Tb927.10.8520;Tb927.10.8510;Tb927.10.8500;Tb927.10.8490;Tb11.v5.0332;Tb11.v5.0331	Tb927.10.8440;Tb11.v5.0330;Tb11.v5.0333;Tb927.10.8480;Tb927.10.8470;Tb927.10.8460;Tb11.v5.0309;Tb11.v5.0308;Tb11.v5.0307;Tb927.10.8530;Tb927.10.8520;Tb927.10.8510;Tb927.10.8500;Tb927.10.8490;Tb11.v5.0332;Tb11.v5.0331	2;2;1;1;1;1;1;1;1;1;1;1;1;1;1;1	2;2;1;1;1;1;1;1;1;1;1;1;1;1;1;1	2;2;1;1;1;1;1;1;1;1;1;1;1;1;1;1	Tb927.10.8440 | organism=Trypanosoma_brucei_TREU927 | product=glucose transporter 1B (THT1-) | location=Tb927_10_v5.1:2093459-2095042(+) | length=527 | sequence_SO=chromosome | SO=protein_coding;Tb11.v5.0330 | organism=Trypanosoma_brucei_TREU927 | product=	16	2	2	2	1	0	0	0	0	0	2	0	2	1	0	0	0	0	0	2	0	2	1	0	0	0	0	0	2	0	2	4.6	4.6	4.6	56.479	527	527;527;322;527;527;527;527;527;527;529;529;529;529;529;529;529	1	5	0	11.098	2.5	0	0
Tb11.v5.0399	Tb11.v5.0399	20	1	1	Tb11.v5.0399 | organism=Trypanosoma_brucei_TREU927 | product=hypothetical protein, conserved | location=Tb927_11_bin_v5.1:1435595-1438963(-) | length=1122 | sequence_SO=random_sequence | SO=protein_coding	1	20	1	1	18	12	18	0	0	0	0	0	0	1	0	0	0	0	0	0	0	0	1	0	0	0	0	0	0	0	0	28.3	2.4	2.4	121.09	1122	1122	1	1	0	3.7647	24.4	16.4	23.4
Tb927.10.16100;Tb11.v5.0411	Tb927.10.16100;Tb11.v5.0411	11;11	11;11	11;11	Tb927.10.16100 | organism=Trypanosoma_brucei_TREU927 | product=FK506-binding protein (FKBP)-type peptidyl-prolyl isomerase, putative | location=Tb927_10_v5.1:3959421-3960698(+) | length=425 | sequence_SO=chromosome | SO=protein_coding;Tb11.v5.0411 | organi	2	11	11	11	8	4	4	0	0	3	1	1	7	8	4	4	0	0	3	1	1	7	8	4	4	0	0	3	1	1	7	36.5	36.5	36.5	47.604	425	425;425	1	31	0	84.62	30.8	13.9	11.8
Tb927.10.540;Tb11.v5.0414	Tb927.10.540;Tb11.v5.0414	6;6	6;6	6;6	Tb927.10.540 | organism=Trypanosoma_brucei_TREU927 | product=ATP-dependent DEAD/H RNA helicase, putative,DEAD box RNA helicase, putative | location=Tb927_10_v5.1:140816-142126(+) | length=436 | sequence_SO=chromosome | SO=protein_coding;Tb11.v5.0414 | orga	2	6	6	6	5	5	3	0	0	3	1	2	1	5	5	3	0	0	3	1	2	1	5	5	3	0	0	3	1	2	1	18.3	18.3	18.3	49.226	436	436;436	1	22	0	13.736	16.5	15.4	8.7
Tb927.11.3650;Tb11.v5.0435	Tb927.11.3650;Tb11.v5.0435	12;12	12;12	12;12	Tb927.11.3650 | organism=Trypanosoma_brucei_TREU927 | product=adenylosuccinate synthetase, putative | location=Tb927_11_v5.1:1075346-1077154(+) | length=602 | sequence_SO=chromosome | SO=protein_coding;Tb11.v5.0435 | organism=Trypanosoma_brucei_TREU927 | p	2	12	12	12	8	4	6	0	0	1	1	1	5	8	4	6	0	0	1	1	1	5	8	4	6	0	0	1	1	1	5	27.9	27.9	27.9	66.674	602	602;602	1	28	0	31.483	21.3	9.3	15.3
Tb11.v5.0468	Tb11.v5.0468	22	2	2	Tb11.v5.0468 | organism=Trypanosoma_brucei_TREU927 | product=alpha tubulin, putative | location=Tb927_11_bin_v5.1:1902781-1903530(+) | length=249 | sequence_SO=random_sequence | SO=protein_coding	1	22	2	2	18	14	15	11	15	14	18	15	20	0	0	0	0	1	0	1	0	2	0	0	0	0	1	0	1	0	2	86.3	4.8	4.8	27.962	249	249	1	4	0	6.2127	79.5	75.9	79.1
Tb927.1.2390;Tb927.1.2370;Tb927.1.2350;Tb927.1.2330;Tb11.v5.0469;Tb927.1.2410	Tb927.1.2390;Tb927.1.2370;Tb927.1.2350;Tb927.1.2330;Tb11.v5.0469;Tb927.1.2410	36;36;36;36;36;21	36;36;36;36;36;21	36;36;36;36;36;21	Tb927.1.2390 | organism=Trypanosoma_brucei_TREU927 | product=beta tubulin | location=Tb927_01_v5.1:581408-582736(+) | length=442 | sequence_SO=chromosome | SO=protein_coding;Tb927.1.2370 | organism=Trypanosoma_brucei_TREU927 | product=beta tubulin | locati	6	36	36	36	29	31	28	21	33	27	29	29	32	29	31	28	21	33	27	29	29	32	29	31	28	21	33	27	29	29	32	80.3	80.3	80.3	49.704	442	442;442;442;442;442;300	1	733	0	323.31	77.8	78.5	76.9
Tb11.v5.0501;Tb927.10.3940;Tb927.10.3930	Tb11.v5.0501;Tb927.10.3940;Tb927.10.3930	14;14;13	14;14;13	14;14;13	Tb11.v5.0501 | organism=Trypanosoma_brucei_TREU927 | product=40S ribosomal protein S3A, putative | location=Tb927_11_bin_v5.1:2072629-2073399(+) | length=256 | sequence_SO=random_sequence | SO=protein_coding;Tb927.10.3940 | organism=Trypanosoma_brucei_TREU	3	14	14	14	3	2	2	1	0	0	4	0	14	3	2	2	1	0	0	4	0	14	3	2	2	1	0	0	4	0	14	50.8	50.8	50.8	29.422	256	256;256;256	1	29	0	120.65	16.8	13.3	12.1
Tb927.10.6880;Tb11.v5.0516	Tb927.10.6880;Tb11.v5.0516	6;6	4;4	4;4	Tb927.10.6880 | organism=Trypanosoma_brucei_TREU927 | product=glyceraldehyde 3-phosphate dehydrogenase, cytosolic (GAP) | location=Tb927_10_v5.1:1730120-1731115(+) | length=331 | sequence_SO=chromosome | SO=protein_coding;Tb11.v5.0516 | organism=Trypanosom	2	6	4	4	4	3	4	1	0	4	3	5	5	2	1	2	1	0	2	1	3	3	2	1	2	1	0	2	1	3	3	19.3	14.8	14.8	35.61	331	331;331	1	16	0	29.635	13	8.8	11.8
Tb927.10.5620;Tb11.v5.0531	Tb927.10.5620;Tb11.v5.0531	47;47	47;47	47;47	Tb927.10.5620 | organism=Trypanosoma_brucei_TREU927 | product=fructose-bisphosphate aldolase, glycosomal (ALD) | location=Tb927_10_v5.1:1404259-1405377(+) | length=372 | sequence_SO=chromosome | SO=protein_coding;Tb11.v5.0531 | organism=Trypanosoma_brucei_	2	47	47	47	41	46	39	8	24	18	37	40	37	41	46	39	8	24	18	37	40	37	41	46	39	8	24	18	37	40	37	91.7	91.7	91.7	41.071	372	372;372	1	687	0	323.31	90.1	91.1	79.8
Tb11.v5.0533;Tb11.v5.0594;Tb927.2.400;Tb927.2.380;Tb927.2.280;Tb927.1.190	Tb11.v5.0533;Tb11.v5.0594;Tb927.2.400;Tb927.2.380;Tb927.2.280;Tb927.1.190	1;1;1;1;1;1	1;1;1;1;1;1	1;1;1;1;1;1	Tb11.v5.0533 | organism=Trypanosoma_brucei_TREU927 | product=retrotransposon hot spot (RHS) protein, putative | location=Tb927_11_bin_v5.1:2299801-2300772(-) | length=323 | sequence_SO=random_sequence | SO=protein_coding;Tb11.v5.0594 | organism=Trypanosoma	6	1	1	1	1	0	0	0	0	0	0	0	0	1	0	0	0	0	0	0	0	0	1	0	0	0	0	0	0	0	0	3.4	3.4	3.4	37.211	323	323;602;789;789;789;830	1	1	0.0016447	2.0825	3.4	0	0
Tb927.4.4820;Tb11.v5.0540;Tb927.4.4860;Tb927.4.4840	Tb927.4.4820;Tb11.v5.0540;Tb927.4.4860;Tb927.4.4840	2;2;1;1	2;2;1;1	2;2;1;1	Tb927.4.4820 | organism=Trypanosoma_brucei_TREU927 | product=amino acid transporter 10, putative (AATP10) | location=Tb927_04_v5.1:1317708-1319180(-) | length=490 | sequence_SO=chromosome | SO=protein_coding;Tb11.v5.0540 | organism=Trypanosoma_brucei_TREU9	4	2	2	2	0	0	0	2	0	0	0	0	0	0	0	0	2	0	0	0	0	0	0	0	0	2	0	0	0	0	0	9	9	9	52.838	490	490;490;473;490	1	2	0	6.1899	0	0	0
Tb927.10.10960;Tb927.10.10950;Tb927.10.10940;Tb927.10.10920;Tb927.10.10900;Tb927.10.10890;Tb11.v5.0543;Tb927.10.10970;Tb927.10.10910;Tb927.10.10980;Tb927.10.10930	Tb927.10.10960;Tb927.10.10950;Tb927.10.10940;Tb927.10.10920;Tb927.10.10900;Tb927.10.10890;Tb11.v5.0543;Tb927.10.10970;Tb927.10.10910;Tb927.10.10980;Tb927.10.10930	44;44;44;44;44;44;44;43;43;42;42	44;44;44;44;44;44;44;43;43;42;42	44;44;44;44;44;44;44;43;43;42;42	Tb927.10.10960 | organism=Trypanosoma_brucei_TREU927 | product=heat shock protein, putative | location=Tb927_10_v5.1:2674103-2676217(-) | length=704 | sequence_SO=chromosome | SO=protein_coding;Tb927.10.10950 | organism=Trypanosoma_brucei_TREU927 | product	11	44	44	44	41	27	32	3	5	23	18	19	25	41	27	32	3	5	23	18	19	25	41	27	32	3	5	23	18	19	25	57.4	57.4	57.4	80.763	704	704;704;704;704;704;704;704;704;704;704;704	1	249	0	323.31	56	41.8	43.5
Tb927.11.4610;Tb11.v5.0587	Tb927.11.4610;Tb11.v5.0587	3;3	3;3	3;3	Tb927.11.4610 | organism=Trypanosoma_brucei_TREU927 | product=protein kinase A regulatory subunit (PKA-R) | location=Tb927_11_v5.1:1327122-1328621(+) | length=499 | sequence_SO=chromosome | SO=protein_coding;Tb11.v5.0587 | organism=Trypanosoma_brucei_TREU9	2	3	3	3	2	0	1	0	0	1	0	1	2	2	0	1	0	0	1	0	1	2	2	0	1	0	0	1	0	1	2	9.2	9.2	9.2	56.734	499	499;499	1	7	0	17.36	5.2	0	2.8
Tb927.10.4940;Tb11.v5.0596	Tb927.10.4940;Tb11.v5.0596	1;1	1;1	1;1	Tb927.10.4940 | organism=Trypanosoma_brucei_TREU927 | product=Nuclear Dbf2-related kinase (PK50) | location=Tb927_10_v5.1:1228896-1230211(-) | length=437 | sequence_SO=chromosome | SO=protein_coding;Tb11.v5.0596 | organism=Trypanosoma_brucei_TREU927 | prod	2	1	1	1	0	0	0	0	0	1	0	0	0	0	0	0	0	0	1	0	0	0	0	0	0	0	0	1	0	0	0	3.2	3.2	3.2	50.146	437	437;470	1	2	0	11.236	0	0	0
Tb927.7.2570;Tb11.v5.0611	Tb927.7.2570;Tb11.v5.0611	26;26	26;26	26;26	Tb927.7.2570 | organism=Trypanosoma_brucei_TREU927 | product=guide RNA associated protein, GAP2 | location=Tb927_07_v5.1:660255-661676(-) | length=473 | sequence_SO=chromosome | SO=protein_coding;Tb11.v5.0611 | organism=Trypanosoma_brucei_TREU927 | product	2	26	26	26	26	23	25	0	0	0	8	13	7	26	23	25	0	0	0	8	13	7	26	23	25	0	0	0	8	13	7	58.1	58.1	58.1	52.545	473	473;473	1	145	0	323.31	58.1	57.9	58.1
Tb927.10.14890;Tb11.v5.0636	Tb927.10.14890;Tb11.v5.0636	15;15	15;15	15;15	Tb927.10.14890 | organism=Trypanosoma_brucei_TREU927 | product=C-terminal motor kinesin, putative (TBKIFC1) | location=Tb927_10_v5.1:3633146-3635608(+) | length=820 | sequence_SO=chromosome | SO=protein_coding;Tb11.v5.0636 | organism=Trypanosoma_brucei_TRE	2	15	15	15	13	4	12	0	0	9	1	1	8	13	4	12	0	0	9	1	1	8	13	4	12	0	0	9	1	1	8	28.7	28.7	28.7	90.8	820	820;820	1	53	0	140.48	24.1	7.3	23
Tb927.10.2890;Tb11.v5.0650	Tb927.10.2890;Tb11.v5.0650	32;32	32;32	32;32	Tb927.10.2890 | organism=Trypanosoma_brucei_TREU927 | product=enolase | location=Tb927_10_v5.1:746309-747598(+) | length=429 | sequence_SO=chromosome | SO=protein_coding;Tb11.v5.0650 | organism=Trypanosoma_brucei_TREU927 | product=enolase, putative | locat	2	32	32	32	27	22	26	1	4	22	20	22	25	27	22	26	1	4	22	20	22	25	27	22	26	1	4	22	20	22	25	72.5	72.5	72.5	46.592	429	429;429	1	223	0	323.31	69.5	66.2	69.2
Tb927.2.830;Tb11.v5.0655;Tb11.v5.0624	Tb927.2.830;Tb11.v5.0655	3;3;1	1;1;1	0;0;0	Tb927.2.830 | organism=Trypanosoma_brucei_TREU927 | product=retrotransposon hot spot protein (RHS, pseudogene), putative,retrotransposon hot spot protein 1 (RHS1), interrupted | location=Tb927_02_v5.1:143717-144772(-) | length=352 | sequence_SO=chromosome	3	3	1	0	0	3	0	0	0	0	1	0	1	0	1	0	0	0	0	0	0	0	0	0	0	0	0	0	0	0	0	11.4	4.5	0	40.504	352	352;427;544	1	1	0	3.5697	0	11.4	0
Tb927.10.8230;Tb11.v5.0668	Tb927.10.8230;Tb11.v5.0668	12;12	12;12	12;12	Tb927.10.8230 | organism=Trypanosoma_brucei_TREU927 | product=protein disulfide isomerase,bloodstream- specific protein 2 precursor | location=Tb927_10_v5.1:2043014-2044507(-) | length=497 | sequence_SO=chromosome | SO=protein_coding;Tb11.v5.0668 | organis	2	12	12	12	9	7	10	0	0	6	2	1	7	9	7	10	0	0	6	2	1	7	9	7	10	0	0	6	2	1	7	28.4	28.4	28.4	55.579	497	497;497	1	42	0	67.476	23.5	18.5	23.3
Tb11.v5.0713	Tb11.v5.0713	9	9	2	Tb11.v5.0713 | organism=Trypanosoma_brucei_TREU927 | product=retrotransposon hot spot (RHS) protein, putative | location=Tb927_11_bin_v5.1:3629729-3631795(+) | length=688 | sequence_SO=random_sequence | SO=protein_coding	1	9	9	2	6	1	3	0	1	4	0	1	1	6	1	3	0	1	4	0	1	1	2	1	1	0	1	1	0	1	1	14.1	14.1	3.3	78.342	688	688	1	17	0	12.3	9.7	1.7	5.5
Tb927.10.13780;Tb11.v5.0718	Tb927.10.13780;Tb11.v5.0718	9;9	9;9	9;9	Tb927.10.13780 | organism=Trypanosoma_brucei_TREU927 | product=glycogen synthase kinase 3 (GSK3) | location=Tb927_10_v5.1:3362271-3363329(-) | length=352 | sequence_SO=chromosome | SO=protein_coding;Tb11.v5.0718 | organism=Trypanosoma_brucei_TREU927 | prod	2	9	9	9	6	2	1	0	1	6	0	2	1	6	2	1	0	1	6	0	2	1	6	2	1	0	1	6	0	2	1	33	33	33	40.32	352	352;352	1	21	0	16.23	24.1	9.4	6
Tb927.10.3710;Tb11.v5.0761	Tb927.10.3710;Tb11.v5.0761	2;2	2;2	2;2	Tb927.10.3710 | organism=Trypanosoma_brucei_TREU927 | product=proteasome activator protein PA26 | location=Tb927_10_v5.1:966040-966735(-) | length=231 | sequence_SO=chromosome | SO=protein_coding;Tb11.v5.0761 | organism=Trypanosoma_brucei_TREU927 | product	2	2	2	2	1	0	1	0	0	0	0	0	1	1	0	1	0	0	0	0	0	1	1	0	1	0	0	0	0	0	1	10.4	10.4	10.4	25.258	231	231;231	1	3	0	2.3139	4.8	0	4.8
Tb11.v5.0768;Tb927.3.3410	Tb11.v5.0768;Tb927.3.3410	1;1	1;1	1;1	Tb11.v5.0768 | organism=Trypanosoma_brucei_TREU927 | product=aspartyl aminopeptidase, putative | location=Tb927_11_bin_v5.1:4011150-4012043(+) | length=297 | sequence_SO=random_sequence | SO=protein_coding;Tb927.3.3410 | organism=Trypanosoma_brucei_TREU927	2	1	1	1	1	0	0	0	0	0	0	0	0	1	0	0	0	0	0	0	0	0	1	0	0	0	0	0	0	0	0	4.7	4.7	4.7	32.305	297	297;451	1	1	0.0046368	1.6283	4.7	0	0
Tb927.8.5465;Tb927.8.5440;Tb11.v5.0798;Tb927.8.5470;Tb11.v5.0797;Tb927.8.5460	Tb927.8.5465;Tb927.8.5440;Tb11.v5.0798;Tb927.8.5470;Tb11.v5.0797;Tb927.8.5460	2;2;2;2;2;2	2;2;2;2;2;2	2;2;2;2;2;2	Tb927.8.5465 | organism=Trypanosoma_brucei_TREU927 | product=flagellar calcium-binding protein,24 kDa calflagin,24 kDa calcimedin (Tb-24) | location=Tb927_08_v5.1:1618985-1619641(+) | length=218 | sequence_SO=chromosome | SO=protein_coding;Tb927.8.5440 | o	6	2	2	2	2	1	1	1	1	2	2	1	2	2	1	1	1	1	2	2	1	2	2	1	1	1	1	2	2	1	2	12.8	12.8	12.8	24.247	218	218;218;218;233;283;407	1	13	0	12.627	12.8	6.4	6.4
Tb11.v5.0826;Tb927.7.6860	Tb11.v5.0826;Tb927.7.6860	1;1	1;1	1;1	Tb11.v5.0826 | organism=Trypanosoma_brucei_TREU927 | product=expression site-associated gene (ESAG) protein, putative | location=Tb927_11_bin_v5.1:4315863-4317257(+) | length=464 | sequence_SO=random_sequence | SO=protein_coding;Tb927.7.6860 | organism=Try	2	1	1	1	0	0	0	0	0	0	1	0	0	0	0	0	0	0	0	1	0	0	0	0	0	0	0	0	1	0	0	2.6	2.6	2.6	50.162	464	464;480	1	1	1	-2	0	0	0
Tb11.v5.0871;Tb927.8.1190;Tb927.8.1170	Tb11.v5.0871;Tb927.8.1190;Tb927.8.1170	1;1;1	1;1;1	1;1;1	Tb11.v5.0871 | organism=Trypanosoma_brucei_TREU927 | product=hypothetical protein, conserved | location=Tb927_11_bin_v5.1:4540406-4541338(+) | length=310 | sequence_SO=random_sequence | SO=protein_coding;Tb927.8.1190 | organism=Trypanosoma_brucei_TREU927 |	3	1	1	1	1	1	1	0	0	1	1	1	1	1	1	1	0	0	1	1	1	1	1	1	1	0	0	1	1	1	1	4.2	4.2	4.2	33.978	310	310;331;331	1	7	0	2.3284	4.2	4.2	4.2
Tb927.11.11330;Tb11.v5.1035;Tb11.v5.1034;Tb927.11.11290	Tb927.11.11330;Tb11.v5.1035	52;52;14;11	52;52;14;11	48;48;14;10	Tb927.11.11330 | organism=Trypanosoma_brucei_TREU927 | product=heat shock protein 70 | location=Tb927_11_v5.1:3028681-3030666(+) | length=661 | sequence_SO=chromosome | SO=protein_coding;Tb11.v5.1035 | organism=Trypanosoma_brucei_TREU927 | product=heat sho	4	52	52	48	43	41	40	26	38	39	39	36	41	43	41	40	26	38	39	39	36	41	39	37	36	23	35	35	35	33	37	62.5	62.5	56.9	71.408	661	661;689;203;676	1	559	0	323.31	56.9	57.3	56.7
Tb927.10.2110;Tb927.10.2100;Tb11.v5.1046;Tb927.10.2090	Tb927.10.2110;Tb927.10.2100;Tb11.v5.1046;Tb927.10.2090	26;26;26;19	26;26;26;19	26;26;26;19	Tb927.10.2110 | organism=Trypanosoma_brucei_TREU927 | product=elongation factor 1-alpha (TEF1) | location=Tb927_10_v5.1:549417-550766(+) | length=449 | sequence_SO=chromosome | SO=protein_coding;Tb927.10.2100 | organism=Trypanosoma_brucei_TREU927 | product	4	26	26	26	24	19	19	8	9	15	16	14	18	24	19	19	8	9	15	16	14	18	24	19	19	8	9	15	16	14	18	65.9	65.9	65.9	49.105	449	449;449;449;348	1	249	0	323.31	63.9	56.8	58.8
Tb927.11.3600;Tb927.11.3590;Tb11.v5.1059	Tb927.11.3600;Tb927.11.3590;Tb11.v5.1059	20;20;20	20;20;20	20;20;20	Tb927.11.3600 | organism=Trypanosoma_brucei_TREU927 | product=40S ribosomal protein S4, putative | location=Tb927_11_v5.1:1063340-1064215(+) | length=273 | sequence_SO=chromosome | SO=protein_coding;Tb927.11.3590 | organism=Trypanosoma_brucei_TREU927 | pro	3	20	20	20	0	0	0	0	0	0	0	0	20	0	0	0	0	0	0	0	0	20	0	0	0	0	0	0	0	0	20	61.9	61.9	61.9	30.644	273	273;273;273	1	23	0	48.7	0	0	0
Tb927.1.120	Tb927.1.120	14	14	4	Tb927.1.120 | organism=Trypanosoma_brucei_TREU927 | product=retrotransposon hot spot protein 4 (RHS4), putative | location=Tb927_01_v5.1:60266-62836(-) | length=856 | sequence_SO=chromosome | SO=protein_coding	1	14	14	4	8	13	5	0	0	1	1	2	0	8	13	5	0	0	1	1	2	0	2	4	2	0	0	0	0	0	0	19	19	6.1	98.024	856	856	1	30	0	27.363	11.4	18	7.1
Tb927.1.2040	Tb927.1.2040	1	1	1	Tb927.1.2040 | organism=Trypanosoma_brucei_TREU927 | product=expression site-associated gene 2 (ESAG2) protein, putative | location=Tb927_01_v5.1:521093-522475(-) | length=460 | sequence_SO=chromosome | SO=protein_coding	1	1	1	1	0	0	1	0	0	1	0	0	0	0	0	1	0	0	1	0	0	0	0	0	1	0	0	1	0	0	0	2	2	2	51.761	460	460	1	2	0.0092025	1.5473	0	0	2
Tb927.1.2400;Tb927.1.2380;Tb927.1.2360;Tb927.1.2340	Tb927.1.2400;Tb927.1.2380;Tb927.1.2360;Tb927.1.2340	34;34;34;34	34;34;34;34	14;14;14;14	Tb927.1.2400 | organism=Trypanosoma_brucei_TREU927 | product=alpha tubulin | location=Tb927_01_v5.1:583368-584723(+) | length=451 | sequence_SO=chromosome | SO=protein_coding;Tb927.1.2380 | organism=Trypanosoma_brucei_TREU927 | product=alpha tubulin | loca	4	34	34	14	26	22	23	17	27	20	23	23	29	26	22	23	17	27	20	23	23	29	8	8	8	6	13	6	6	8	11	72.7	72.7	27.5	49.787	451	451;451;451;451	1	420	0	323.31	67	66.7	66.7
Tb927.1.2550;Tb927.1.2530;Tb927.1.2510;Tb927.1.2490;Tb927.1.2470;Tb927.1.2450;Tb927.1.2430	Tb927.1.2550;Tb927.1.2530;Tb927.1.2510;Tb927.1.2490;Tb927.1.2470;Tb927.1.2450;Tb927.1.2430	1;1;1;1;1;1;1	1;1;1;1;1;1;1	1;1;1;1;1;1;1	Tb927.1.2550 | organism=Trypanosoma_brucei_TREU927 | product=histone H3, putative | location=Tb927_01_v5.1:602011-602412(+) | length=133 | sequence_SO=chromosome | SO=protein_coding;Tb927.1.2530 | organism=Trypanosoma_brucei_TREU927 | product=histone H3, p	7	1	1	1	1	1	1	0	0	0	0	0	1	1	1	1	0	0	0	0	0	1	1	1	1	0	0	0	0	0	1	6	6	6	14.75	133	133;133;133;133;133;133;133	1	4	0	3.0324	6	6	6
Tb927.1.2670	Tb927.1.2670	12	12	12	Tb927.1.2670 | organism=Trypanosoma_brucei_TREU927 | product=flagellar protein PF16 | location=Tb927_01_v5.1:618929-620470(+) | length=513 | sequence_SO=chromosome | SO=protein_coding	1	12	12	12	0	1	0	0	1	2	10	10	6	0	1	0	0	1	2	10	10	6	0	1	0	0	1	2	10	10	6	34.1	34.1	34.1	56.126	513	513	1	33	0	45.336	0	3.3	0
Tb927.1.3010	Tb927.1.3010	2	2	2	Tb927.1.3010 | organism=Trypanosoma_brucei_TREU927 | product=mRNA processing protein, putative | location=Tb927_01_v5.1:668456-669910(+) | length=372 | sequence_SO=chromosome | SO=protein_coding	1	2	2	2	1	1	0	0	0	0	0	0	0	1	1	0	0	0	0	0	0	0	1	1	0	0	0	0	0	0	0	8.3	8.3	8.3	40.813	372	372	1	3	0	2.6174	5.6	2.7	0
Tb927.1.3070	Tb927.1.3070	2	2	2	Tb927.1.3070 | organism=Trypanosoma_brucei_TREU927 | product=hypothetical protein, conserved | location=Tb927_01_v5.1:675213-676454(+) | length=413 | sequence_SO=chromosome | SO=protein_coding	1	2	2	2	0	1	0	0	0	0	2	1	0	0	1	0	0	0	0	2	1	0	0	1	0	0	0	0	2	1	0	8.7	8.7	8.7	44.99	413	413	1	4	0	2.399	0	4.1	0
Tb927.1.3120	Tb927.1.3120	1	1	1	Tb927.1.3120 | organism=Trypanosoma_brucei_TREU927 | product=separase, putative,cysteine peptidase, Clan CD, family C50, putative | location=Tb927_01_v5.1:679153-682632(+) | length=1159 | sequence_SO=chromosome | SO=protein_coding	1	1	1	1	0	0	0	0	0	0	0	0	1	0	0	0	0	0	0	0	0	1	0	0	0	0	0	0	0	0	1	1.3	1.3	1.3	126.34	1159	1159	1	1	1	-2	0	0	0
Tb927.1.3180	Tb927.1.3180	8	8	2	Tb927.1.3180 | organism=Trypanosoma_brucei_TREU927 | product=40S ribosomal protein S11, putative | location=Tb927_01_v5.1:688963-689487(+) | length=174 | sequence_SO=chromosome | SO=protein_coding	1	8	8	2	1	0	0	0	0	0	0	0	8	1	0	0	0	0	0	0	0	8	0	0	0	0	0	0	0	0	2	50.6	50.6	12.1	20.059	174	174	1	11	0	20.727	5.2	0	0
Tb927.1.3830	Tb927.1.3830	14	14	14	Tb927.1.3830 | organism=Trypanosoma_brucei_TREU927 | product=glucose-6-phosphate isomerase, glycosomal (PGI) | location=Tb927_01_v5.1:816419-818242(+) | length=607 | sequence_SO=chromosome | SO=protein_coding	1	14	14	14	11	3	12	0	1	6	1	3	4	11	3	12	0	1	6	1	3	4	11	3	12	0	1	6	1	3	4	33.9	33.9	33.9	67.614	607	607	1	49	0	80.894	25.9	6.9	30.6
Tb927.1.3950	Tb927.1.3950	5	5	5	Tb927.1.3950 | organism=Trypanosoma_brucei_TREU927 | product=alanine aminotransferase (ALAT) | location=Tb927_01_v5.1:840877-842391(+) | length=504 | sequence_SO=chromosome | SO=protein_coding	1	5	5	5	2	1	1	0	1	2	0	2	4	2	1	1	0	1	2	0	2	4	2	1	1	0	1	2	0	2	4	16.7	16.7	16.7	55.704	504	504	1	13	0	47.633	7.9	3.4	3.4
Tb927.1.4690	Tb927.1.4690	1	1	1	Tb927.1.4690 | organism=Trypanosoma_brucei_TREU927 | product=arginine N-methyltransferase (PRMT1) | location=Tb927_01_v5.1:964186-965223(+) | length=345 | sequence_SO=chromosome | SO=protein_coding	1	1	1	1	1	0	0	0	0	0	0	0	0	1	0	0	0	0	0	0	0	0	1	0	0	0	0	0	0	0	0	3.2	3.2	3.2	39.206	345	345	1	1	0	2.2779	3.2	0	0
Tb927.1.700;Tb927.1.720	Tb927.1.700	33;8	33;8	14;2	Tb927.1.700 | organism=Trypanosoma_brucei_TREU927 | product=phosphoglycerate kinase (PGKC) | location=Tb927_01_v5.1:231788-233110(-) | length=440 | sequence_SO=chromosome | SO=protein_coding	2	33	33	14	29	30	22	0	2	9	23	21	19	29	30	22	0	2	9	23	21	19	12	14	10	0	0	4	8	7	6	81.4	81.4	33.2	47.245	440	440;509	1	225	0	323.31	77.5	77.5	69.5
Tb927.1.710	Tb927.1.710	20	1	1	Tb927.1.710 | organism=Trypanosoma_brucei_TREU927 | product=phosphoglycerate kinase (PGKB) | location=Tb927_01_v5.1:234158-235420(-) | length=420 | sequence_SO=chromosome | SO=protein_coding	1	20	1	1	18	17	13	0	2	5	16	15	14	1	1	1	0	0	0	1	1	1	1	1	1	0	0	0	1	1	1	59.3	2.6	2.6	45.247	420	420	1	6	0	2.4154	55	55.2	46.9
Tb927.10.10010	Tb927.10.10010	3	3	3	Tb927.10.10010 | organism=Trypanosoma_brucei_TREU927 | product=60S acidic ribosomal protein, putative | location=Tb927_10_v5.1:2468708-2469388(+) | length=226 | sequence_SO=chromosome | SO=protein_coding	1	3	3	3	1	2	0	0	0	0	0	1	0	1	2	0	0	0	0	0	1	0	1	2	0	0	0	0	0	1	0	20.4	20.4	20.4	25.628	226	226	1	4	0	5.3939	7.5	11.5	0
Tb927.10.10130	Tb927.10.10130	11	11	11	Tb927.10.10130 | organism=Trypanosoma_brucei_TREU927 | product=mitochondrial RNA binding complex 1 subunit (MRB10130) | location=Tb927_10_v5.1:2495034-2496671(+) | length=545 | sequence_SO=chromosome | SO=protein_coding	1	11	11	11	9	7	8	0	2	1	0	0	0	9	7	8	0	2	1	0	0	0	9	7	8	0	2	1	0	0	0	26.6	26.6	26.6	61.046	545	545	1	37	0	110.75	25	18.9	20.4
Tb927.10.10160	Tb927.10.10160	2	2	2	Tb927.10.10160 | organism=Trypanosoma_brucei_TREU927 | product=hypothetical protein, conserved | location=Tb927_10_v5.1:2500846-2502012(+) | length=388 | sequence_SO=chromosome | SO=protein_coding	1	2	2	2	0	0	1	0	0	0	0	2	1	0	0	1	0	0	0	0	2	1	0	0	1	0	0	0	0	2	1	11.3	11.3	11.3	42.907	388	388	1	4	0	3.1703	0	0	3.1
Tb927.10.10170	Tb927.10.10170	6	6	6	Tb927.10.10170 | organism=Trypanosoma_brucei_TREU927 | product=predicted WD40 repeat protein | location=Tb927_10_v5.1:2502370-2503704(+) | length=444 | sequence_SO=chromosome | SO=protein_coding	1	6	6	6	2	2	0	0	0	0	2	5	0	2	2	0	0	0	0	2	5	0	2	2	0	0	0	0	2	5	0	24.1	24.1	24.1	48.744	444	444	1	11	0	12.656	5	5	0
Tb927.10.10390	Tb927.10.10390	3	3	3	Tb927.10.10390 | organism=Trypanosoma_brucei_TREU927 | product=trypanothione reductase | location=Tb927_10_v5.1:2562393-2563871(-) | length=492 | sequence_SO=chromosome | SO=protein_coding	1	3	3	3	1	0	0	0	0	0	0	0	3	1	0	0	0	0	0	0	0	3	1	0	0	0	0	0	0	0	3	6.3	6.3	6.3	53.156	492	492	1	4	0	3.9099	2	0	0
Tb927.10.10400	Tb927.10.10400	1	1	1	Tb927.10.10400 | organism=Trypanosoma_brucei_TREU927 | product=hypothetical protein, conserved | location=Tb927_10_v5.1:2564023-2565003(-) | length=326 | sequence_SO=chromosome | SO=protein_coding	1	1	1	1	0	0	0	0	0	0	1	0	0	0	0	0	0	0	0	1	0	0	0	0	0	0	0	0	1	0	0	3.1	3.1	3.1	37.867	326	326	1	1	0.0046656	1.6845	0	0	0
Tb927.10.10590;Tb927.10.10580;Tb927.10.10570;Tb927.10.10560;Tb927.10.10550;Tb927.10.10540;Tb927.10.10530;Tb927.10.10520;Tb927.10.10510;Tb927.10.10500;Tb927.10.10490;Tb927.10.10480;Tb927.10.10470;Tb927.10.10460	Tb927.10.10590;Tb927.10.10580;Tb927.10.10570;Tb927.10.10560;Tb927.10.10550;Tb927.10.10540;Tb927.10.10530;Tb927.10.10520;Tb927.10.10510;Tb927.10.10500;Tb927.10.10490;Tb927.10.10480;Tb927.10.10470;Tb927.10.10460	5;5;5;5;5;5;5;5;5;5;5;5;5;5	5;5;5;5;5;5;5;5;5;5;5;5;5;5	5;5;5;5;5;5;5;5;5;5;5;5;5;5	Tb927.10.10590 | organism=Trypanosoma_brucei_TREU927 | product=histone H2B, putative | location=Tb927_10_v5.1:2584533-2584871(-) | length=112 | sequence_SO=chromosome | SO=protein_coding;Tb927.10.10580 | organism=Trypanosoma_brucei_TREU927 | product=histon	14	5	5	5	3	4	2	0	1	0	2	3	5	3	4	2	0	1	0	2	3	5	3	4	2	0	1	0	2	3	5	43.8	43.8	43.8	12.569	112	112;112;112;112;112;112;112;112;112;112;112;112;112;112	1	20	0	36.576	28.6	37.5	19.6
Tb927.10.1060	Tb927.10.1060	9	9	9	Tb927.10.1060 | organism=Trypanosoma_brucei_TREU927 | product=T-complex protein 1, delta subunit, putative (TCP-1-delta) | location=Tb927_10_v5.1:285416-287026(-) | length=536 | sequence_SO=chromosome | SO=protein_coding	1	9	9	9	4	0	2	0	0	1	2	0	6	4	0	2	0	0	1	2	0	6	4	0	2	0	0	1	2	0	6	24.4	24.4	24.4	58.361	536	536	1	15	0	22.15	10.3	0	3.9
Tb927.10.10610	Tb927.10.10610	1	1	1	Tb927.10.10610 | organism=Trypanosoma_brucei_TREU927 | product=protein tyrosine phosphatase, putative | location=Tb927_10_v5.1:2586326-2587015(-) | length=229 | sequence_SO=chromosome | SO=protein_coding	1	1	1	1	0	0	0	1	0	1	0	0	0	0	0	0	1	0	1	0	0	0	0	0	0	1	0	1	0	0	0	5.7	5.7	5.7	25.449	229	229	1	2	0	2.3381	0	0	0
Tb927.10.10700	Tb927.10.10700	8	8	8	Tb927.10.10700 | organism=Trypanosoma_brucei_TREU927 | product=splicing factor Prp31 | location=Tb927_10_v5.1:2600742-2601809(-) | length=355 | sequence_SO=chromosome | SO=protein_coding	1	8	8	8	5	4	3	0	0	0	7	7	2	5	4	3	0	0	0	7	7	2	5	4	3	0	0	0	7	7	2	30.7	30.7	30.7	39.686	355	355	1	32	0	67.943	18.6	15.8	9.9
Tb927.10.1090;Tb927.10.1080	Tb927.10.1090;Tb927.10.1080	6;6	6;6	6;6	Tb927.10.1090 | organism=Trypanosoma_brucei_TREU927 | product=40S ribosomal protein S23, putative (RPS23) | location=Tb927_10_v5.1:290689-291120(-) | length=143 | sequence_SO=chromosome | SO=protein_coding;Tb927.10.1080 | organism=Trypanosoma_brucei_TREU92	2	6	6	6	0	0	0	0	0	0	0	0	6	0	0	0	0	0	0	0	0	6	0	0	0	0	0	0	0	0	6	54.5	54.5	54.5	15.928	143	143;143	1	6	0	47.6	0	0	0
Tb927.10.10830	Tb927.10.10830	14	14	14	Tb927.10.10830 | organism=Trypanosoma_brucei_TREU927 | product=RGG2 (RGG2) | location=Tb927_10_v5.1:2630304-2631266(-) | length=320 | sequence_SO=chromosome | SO=protein_coding	1	14	14	14	12	10	12	0	0	0	2	2	1	12	10	12	0	0	0	2	2	1	12	10	12	0	0	0	2	2	1	36.9	36.9	36.9	32.404	320	320	1	64	0	323.31	28.8	28.4	36.6
Tb927.10.10850	Tb927.10.10850	21	21	21	Tb927.10.10850 | organism=Trypanosoma_brucei_TREU927 | product=argonaute-like protein (AGO1) | location=Tb927_10_v5.1:2634956-2637667(-) | length=903 | sequence_SO=chromosome | SO=protein_coding	1	21	21	21	17	13	9	0	0	0	8	11	4	17	13	9	0	0	0	8	11	4	17	13	9	0	0	0	8	11	4	30.2	30.2	30.2	99.184	903	903	1	64	0	58.821	25.8	19.8	13.6
Tb927.10.1100;Tb927.6.4690	Tb927.10.1100;Tb927.6.4690	13;11	13;11	13;11	Tb927.10.1100 | organism=Trypanosoma_brucei_TREU927 | product=60S ribosomal protein L9, putative | location=Tb927_10_v5.1:291635-292204(-) | length=189 | sequence_SO=chromosome | SO=protein_coding;Tb927.6.4690 | organism=Trypanosoma_brucei_TREU927 | produc	2	13	13	13	7	10	9	0	0	0	13	10	7	7	10	9	0	0	0	13	10	7	7	10	9	0	0	0	13	10	7	65.1	65.1	65.1	21.857	189	189;187	1	84	0	253.74	55	59.8	58.7
Tb927.10.11230	Tb927.10.11230	1	1	1	Tb927.10.11230 | organism=Trypanosoma_brucei_TREU927 | product=hypothetical protein, conserved | location=Tb927_10_v5.1:2746454-2747425(-) | length=323 | sequence_SO=chromosome | SO=protein_coding	1	1	1	1	1	1	1	0	0	0	0	1	0	1	1	1	0	0	0	0	1	0	1	1	1	0	0	0	0	1	0	6.8	6.8	6.8	34.706	323	323	1	4	0	8.3459	6.8	6.8	6.8
Tb927.10.11390	Tb927.10.11390	14	14	14	Tb927.10.11390 | organism=Trypanosoma_brucei_TREU927 | product=60S ribosomal protein L6, putative | location=Tb927_10_v5.1:2777404-2777982(+) | length=192 | sequence_SO=chromosome | SO=protein_coding	1	14	14	14	2	14	14	0	0	0	10	5	6	2	14	14	0	0	0	10	5	6	2	14	14	0	0	0	10	5	6	65.1	65.1	65.1	21.185	192	192	1	66	0	300.99	18.2	65.1	65.1
Tb927.9.6070;Tb927.10.11540	Tb927.9.6070;Tb927.10.11540	13;13	13;13	13;13	Tb927.9.6070 | organism=Trypanosoma_brucei_TREU927 | product=40S ribosomal protein S3, putative (RPS3) | location=Tb927_09_v5.1:1008372-1009016(+) | length=214 | sequence_SO=chromosome | SO=protein_coding;Tb927.10.11540 | organism=Trypanosoma_brucei_TREU92	2	13	13	13	3	5	4	0	0	0	4	3	12	3	5	4	0	0	0	4	3	12	3	5	4	0	0	0	4	3	12	63.6	63.6	63.6	24.216	214	214;214	1	38	0	47.107	23.8	34.6	29.4
Tb927.10.11760	Tb927.10.11760	21	21	21	Tb927.10.11760 | organism=Trypanosoma_brucei_TREU927 | product=pumilio/PUF RNA binding protein 6 (PUF6) | location=Tb927_10_v5.1:2869425-2871956(+) | length=843 | sequence_SO=chromosome | SO=protein_coding	1	21	21	21	12	10	10	0	1	9	15	12	16	12	10	10	0	1	9	15	12	16	12	10	10	0	1	9	15	12	16	34.8	34.8	34.8	93.062	843	843	1	101	0	187.92	21.2	17.6	19.1
Tb927.10.11870	Tb927.10.11870	9	9	9	Tb927.10.11870 | organism=Trypanosoma_brucei_TREU927 | product=mitochondrial RNA binding protein (MRB11870) | location=Tb927_10_v5.1:2898295-2899227(+) | length=310 | sequence_SO=chromosome | SO=protein_coding	1	9	9	9	6	6	7	0	0	0	0	0	0	6	6	7	0	0	0	0	0	0	6	6	7	0	0	0	0	0	0	45.2	45.2	45.2	34.683	310	310	1	22	0	56.059	24.2	28.7	39.7
Tb927.10.1230	Tb927.10.1230	3	3	3	Tb927.10.1230 | organism=Trypanosoma_brucei_TREU927 | product=hypothetical protein, conserved | location=Tb927_10_v5.1:333466-334494(-) | length=342 | sequence_SO=chromosome | SO=protein_coding	1	3	3	3	1	0	0	0	3	3	0	0	0	1	0	0	0	3	3	0	0	0	1	0	0	0	3	3	0	0	0	9.1	9.1	9.1	37.682	342	342	1	7	0	3.4762	3.2	0	0
Tb927.10.12330	Tb927.10.12330	8	8	8	Tb927.10.12330 | organism=Trypanosoma_brucei_TREU927 | product=zinc finger protein family member, putative (ZC3H34) | location=Tb927_10_v5.1:2992296-2992904(-) | length=202 | sequence_SO=chromosome | SO=protein_coding	1	8	8	8	8	3	6	0	0	0	2	3	2	8	3	6	0	0	0	2	3	2	8	3	6	0	0	0	2	3	2	44.1	44.1	44.1	22.365	202	202	1	25	0	31.539	44.1	17.8	34.2
Tb927.10.12660	Tb927.10.12660	16	16	16	Tb927.10.12660 | organism=Trypanosoma_brucei_TREU927 | product=pumilio/PUF RNA binding protein 2 (PUF2) | location=Tb927_10_v5.1:3073565-3076108(-) | length=847 | sequence_SO=chromosome | SO=protein_coding	1	16	16	16	4	4	5	0	1	4	13	13	9	4	4	5	0	1	4	13	13	9	4	4	5	0	1	4	13	13	9	25.7	25.7	25.7	92.245	847	847	1	61	0	76.528	7.3	7.3	9
Tb927.11.9730;Tb927.10.12680	Tb927.11.9730;Tb927.10.12680	3;3	3;3	3;3	Tb927.11.9730 | organism=Trypanosoma_brucei_TREU927 | product=60S ribosomal protein L34, putative | location=Tb927_11_v5.1:2634550-2635062(-) | length=170 | sequence_SO=chromosome | SO=protein_coding;Tb927.10.12680 | organism=Trypanosoma_brucei_TREU927 | p	2	3	3	3	0	0	0	0	0	0	0	0	3	0	0	0	0	0	0	0	0	3	0	0	0	0	0	0	0	0	3	15.3	15.3	15.3	19.336	170	170;170	1	3	0	13.065	0	0	0
Tb927.10.12710	Tb927.10.12710	17	17	17	Tb927.10.12710 | organism=Trypanosoma_brucei_TREU927 | product=heat shock protein 110, putative | location=Tb927_10_v5.1:3085110-3087545(-) | length=811 | sequence_SO=chromosome | SO=protein_coding	1	17	17	17	15	3	13	0	1	6	3	2	8	15	3	13	0	1	6	3	2	8	15	3	13	0	1	6	3	2	8	27.6	27.6	27.6	90.863	811	811	1	52	0	58.683	24	4.8	20.7
Tb927.10.12740	Tb927.10.12740	3	3	3	Tb927.10.12740 | organism=Trypanosoma_brucei_TREU927 | product=zinc finger protein family memeber, putative (ZC3H35) | location=Tb927_10_v5.1:3093176-3094600(-) | length=474 | sequence_SO=chromosome | SO=protein_coding	1	3	3	3	0	0	0	0	0	0	1	1	3	0	0	0	0	0	0	1	1	3	0	0	0	0	0	0	1	1	3	10.3	10.3	10.3	51.324	474	474	1	8	0	10.448	0	0	0
Tb927.10.12820	Tb927.10.12820	2	2	2	Tb927.10.12820 | organism=Trypanosoma_brucei_TREU927 | product=hypothetical protein, conserved | location=Tb927_10_v5.1:3112608-3115649(-) | length=1013 | sequence_SO=chromosome | SO=protein_coding	1	2	2	2	1	1	0	0	0	1	1	0	2	1	1	0	0	0	1	1	0	2	1	1	0	0	0	1	1	0	2	2.7	2.7	2.7	110.24	1013	1013	1	6	0	3.6547	1.2	1.2	0
Tb927.10.12890	Tb927.10.12890	5	5	5	Tb927.10.12890 | organism=Trypanosoma_brucei_TREU927 | product=bifunctional aminoacyl-tRNA synthetase, putative | location=Tb927_10_v5.1:3132295-3134721(-) | length=808 | sequence_SO=chromosome | SO=protein_coding	1	5	5	5	1	0	1	0	1	2	0	0	2	1	0	1	0	1	2	0	0	2	1	0	1	0	1	2	0	0	2	10.9	10.9	10.9	90.96	808	808	1	7	0	10.664	2	0	3.2
Tb927.10.12930	Tb927.10.12930	3	3	3	Tb927.10.12930 | organism=Trypanosoma_brucei_TREU927 | product=hypothetical protein, conserved | location=Tb927_10_v5.1:3142917-3143540(-) | length=207 | sequence_SO=chromosome | SO=protein_coding	1	3	3	3	1	0	1	0	2	2	1	1	0	1	0	1	0	2	2	1	1	0	1	0	1	0	2	2	1	1	0	20.3	20.3	20.3	23.985	207	207	1	8	0	6.2726	6.3	0	6.3
Tb927.10.12960	Tb927.10.12960	5	5	5	Tb927.10.12960 | organism=Trypanosoma_brucei_TREU927 | product=ras-related protein rab-5,small GTPase, putative (RAB5A) | location=Tb927_10_v5.1:3150211-3150903(-) | length=230 | sequence_SO=chromosome | SO=protein_coding	1	5	5	5	1	1	2	1	2	3	4	2	4	1	1	2	1	2	3	4	2	4	1	1	2	1	2	3	4	2	4	28.3	28.3	28.3	24.484	230	230	1	20	0	13.312	8.7	8.7	13.5
Tb927.11.9710;Tb927.10.13500	Tb927.11.9710;Tb927.10.13500	25;25	25;25	25;25	Tb927.11.9710 | organism=Trypanosoma_brucei_TREU927 | product=60S ribosomal protein L10a, putative (RPL10A) | location=Tb927_11_v5.1:2632935-2633579(-) | length=214 | sequence_SO=chromosome | SO=protein_coding;Tb927.10.13500 | organism=Trypanosoma_brucei_T	2	25	25	25	21	19	16	0	1	1	24	21	15	21	19	16	0	1	1	24	21	15	21	19	16	0	1	1	24	21	15	79.9	79.9	79.9	24.597	214	214;214	1	181	0	323.31	76.6	60.3	62.1
Tb927.10.13790	Tb927.10.13790	1	1	1	Tb927.10.13790 | organism=Trypanosoma_brucei_TREU927 | product=hypothetical protein, conserved | location=Tb927_10_v5.1:3366096-3368138(-) | length=680 | sequence_SO=chromosome | SO=protein_coding	1	1	1	1	1	0	0	0	0	0	0	0	0	1	0	0	0	0	0	0	0	0	1	0	0	0	0	0	0	0	0	2.8	2.8	2.8	74.674	680	680	1	1	0.0047695	1.8405	2.8	0	0
Tb927.10.13800	Tb927.10.13800	3	3	3	Tb927.10.13800 | organism=Trypanosoma_brucei_TREU927 | product=hypothetical protein, conserved | location=Tb927_10_v5.1:3370491-3371462(-) | length=323 | sequence_SO=chromosome | SO=protein_coding	1	3	3	3	2	1	1	0	0	0	3	3	1	2	1	1	0	0	0	3	3	1	2	1	1	0	0	0	3	3	1	17.6	17.6	17.6	34.401	323	323	1	11	0	3.3369	13.9	9.9	9.9
Tb927.10.14030	Tb927.10.14030	2	2	2	Tb927.10.14030 | organism=Trypanosoma_brucei_TREU927 | product=hypothetical protein, conserved | location=Tb927_10_v5.1:3417608-3418957(-) | length=449 | sequence_SO=chromosome | SO=protein_coding	1	2	2	2	1	0	1	0	0	0	0	0	0	1	0	1	0	0	0	0	0	0	1	0	1	0	0	0	0	0	0	6.5	6.5	6.5	50.474	449	449	1	2	0.0016556	2.1085	2.4	0	4
Tb927.10.14040	Tb927.10.14040	2	2	2	Tb927.10.14040 | organism=Trypanosoma_brucei_TREU927 | product=vacuolar ATP synthase subunit c, putative | location=Tb927_10_v5.1:3419149-3420291(-) | length=380 | sequence_SO=chromosome | SO=protein_coding	1	2	2	2	1	0	0	0	0	1	0	0	0	1	0	0	0	0	1	0	0	0	1	0	0	0	0	1	0	0	0	7.1	7.1	7.1	43.414	380	380	1	2	0	4.261	7.1	0	0
Tb927.10.14140;Tb11.v5.0605	Tb927.10.14140;Tb11.v5.0605	27;25	27;25	27;25	Tb927.10.14140 | organism=Trypanosoma_brucei_TREU927 | product=pyruvate kinase 1 (PYK1) | location=Tb927_10_v5.1:3434717-3436216(-) | length=499 | sequence_SO=chromosome | SO=protein_coding;Tb11.v5.0605 | organism=Trypanosoma_brucei_TREU927 | product=pyruv	2	27	27	27	25	15	22	1	4	17	13	13	21	25	15	22	1	4	17	13	13	21	25	15	22	1	4	17	13	13	21	71.9	71.9	71.9	54.423	499	499;458	1	179	0	323.31	64.5	45.9	66.7
Tb927.10.14180	Tb927.10.14180	12	12	12	Tb927.10.14180 | organism=Trypanosoma_brucei_TREU927 | product=protein transport protein SEC13, putative,cytosolic coat protein, putative | location=Tb927_10_v5.1:3444000-3445124(-) | length=374 | sequence_SO=chromosome | SO=protein_coding	1	12	12	12	11	7	11	0	0	0	1	0	1	11	7	11	0	0	0	1	0	1	11	7	11	0	0	0	1	0	1	40.9	40.9	40.9	41.675	374	374	1	38	0	85.387	37.7	24.6	35.6
Tb927.10.14240;Tb11.v5.0859	Tb927.10.14240;Tb11.v5.0859	2;1	2;1	2;1	Tb927.10.14240 | organism=Trypanosoma_brucei_TREU927 | product=N-myristoyltransferase (NMT) | location=Tb927_10_v5.1:3456872-3458212(-) | length=446 | sequence_SO=chromosome | SO=protein_coding;Tb11.v5.0859 | organism=Trypanosoma_brucei_TREU927 | product=N	2	2	2	2	2	0	0	0	0	0	0	0	0	2	0	0	0	0	0	0	0	0	2	0	0	0	0	0	0	0	0	10.3	10.3	10.3	50.528	446	446;378	1	2	0	4.816	10.3	0	0
Tb927.10.14360	Tb927.10.14360	9	9	9	Tb927.10.14360 | organism=Trypanosoma_brucei_TREU927 | product=U2 small nuclear ribonucleoprotein 40K (U2_40K) | location=Tb927_10_v5.1:3492521-3493498(-) | length=325 | sequence_SO=chromosome | SO=protein_coding	1	9	9	9	6	3	2	0	0	0	6	8	2	6	3	2	0	0	0	6	8	2	6	3	2	0	0	0	6	8	2	34.2	34.2	34.2	36.492	325	325	1	29	0	26.941	29.2	20.9	12.9
Tb927.10.14550	Tb927.10.14550	2	2	2	Tb927.10.14550 | organism=Trypanosoma_brucei_TREU927 | product=ATP-dependent DEAD/H RNA helicase, putative | location=Tb927_10_v5.1:3565941-3567923(-) | length=660 | sequence_SO=chromosome | SO=protein_coding	1	2	2	2	0	1	1	0	0	0	1	0	0	0	1	1	0	0	0	1	0	0	0	1	1	0	0	0	1	0	0	3.8	3.8	3.8	71.366	660	660	1	3	0	2.2903	0	2	1.8
Tb927.11.4820;Tb927.10.14580	Tb927.11.4820;Tb927.10.14580	5;5	5;5	5;5	Tb927.11.4820 | organism=Trypanosoma_brucei_TREU927 | product=60S ribosomal protein L17, putative | location=Tb927_11_v5.1:1386998-1387498(+) | length=166 | sequence_SO=chromosome | SO=protein_coding;Tb927.10.14580 | organism=Trypanosoma_brucei_TREU927 | p	2	5	5	5	0	0	0	0	0	0	0	0	5	0	0	0	0	0	0	0	0	5	0	0	0	0	0	0	0	0	5	33.7	33.7	33.7	19.105	166	166;166	1	5	0	6.1947	0	0	0
Tb927.10.14710;Tb927.10.14600	Tb927.10.14710;Tb927.10.14600	15;15	15;15	15;15	Tb927.10.14710 | organism=Trypanosoma_brucei_TREU927 | product=40S ribosomal protein S2, putative (RPS2) | location=Tb927_10_v5.1:3591980-3592780(-) | length=266 | sequence_SO=chromosome | SO=protein_coding;Tb927.10.14600 | organism=Trypanosoma_brucei_TREU	2	15	15	15	12	12	12	0	0	1	12	10	12	12	12	12	0	0	1	12	10	12	12	12	12	0	0	1	12	10	12	60.2	60.2	60.2	28.642	266	266;266	1	139	0	232.86	55.6	56.4	56.4
Tb927.10.14630;Tb927.10.14750	Tb927.10.14630;Tb927.10.14750	3;3	3;3	3;3	Tb927.10.14630 | organism=Trypanosoma_brucei_TREU927 | product=fibrillarin, putative | location=Tb927_10_v5.1:3582235-3582921(-) | length=228 | sequence_SO=chromosome | SO=protein_coding;Tb927.10.14750 | organism=Trypanosoma_brucei_TREU927 | product=fibril	2	3	3	3	0	3	0	0	0	0	0	0	0	0	3	0	0	0	0	0	0	0	0	3	0	0	0	0	0	0	0	20.6	20.6	20.6	24.997	228	228;304	1	3	0	3.1151	0	20.6	0
Tb927.10.14700	Tb927.10.14700	4	4	4	Tb927.10.14700 | organism=Trypanosoma_brucei_TREU927 | product=hypothetical protein, conserved | location=Tb927_10_v5.1:3590505-3591533(-) | length=342 | sequence_SO=chromosome | SO=protein_coding	1	4	4	4	2	2	1	0	0	0	3	3	1	2	2	1	0	0	0	3	3	1	2	2	1	0	0	0	3	3	1	14.6	14.6	14.6	37.7	342	342	1	12	0	5.8601	7.3	7.3	3.8
Tb927.10.14780	Tb927.10.14780	8	8	8	Tb927.10.14780 | organism=Trypanosoma_brucei_TREU927 | product=protein kinase, putative,mitogen-activated protein kinase kinase kinase, putative | location=Tb927_10_v5.1:3603549-3604403(-) | length=284 | sequence_SO=chromosome | SO=protein_coding	1	8	8	8	5	4	3	0	3	7	3	3	3	5	4	3	0	3	7	3	3	3	5	4	3	0	3	7	3	3	3	37.3	37.3	37.3	31.375	284	284	1	40	0	62.469	20.4	16.5	13.4
Tb927.10.14840;Tb927.10.14830;Tb927.10.14820	Tb927.10.14840;Tb927.10.14830;Tb927.10.14820	9;9;9	9;9;9	9;9;9	Tb927.10.14840 | organism=Trypanosoma_brucei_TREU927 | product=mitochondrial carrier protein (MCP5a) | location=Tb927_10_v5.1:3615071-3615994(-) | length=307 | sequence_SO=chromosome | SO=protein_coding;Tb927.10.14830 | organism=Trypanosoma_brucei_TREU927	3	9	9	9	1	5	0	4	8	6	0	0	0	1	5	0	4	8	6	0	0	0	1	5	0	4	8	6	0	0	0	33.2	33.2	33.2	34.074	307	307;307;307	1	27	0	59.438	3.6	24.4	0
Tb927.10.1490	Tb927.10.1490	1	1	1	Tb927.10.1490 | organism=Trypanosoma_brucei_TREU927 | product=hypothetical protein, conserved | location=Tb927_10_v5.1:394070-397732(-) | length=1220 | sequence_SO=chromosome | SO=protein_coding	1	1	1	1	0	0	0	0	0	0	1	0	1	0	0	0	0	0	0	1	0	1	0	0	0	0	0	0	1	0	1	1.1	1.1	1.1	134.81	1220	1220	1	2	0.0016584	2.1162	0	0	0
Tb927.10.14910	Tb927.10.14910	18	18	18	Tb927.10.14910 | organism=Trypanosoma_brucei_TREU927 | product=sarcoplasmic reticulum glycoprotein, putative,sarcalumenin precursor, putative | location=Tb927_10_v5.1:3642186-3643739(+) | length=517 | sequence_SO=chromosome | SO=protein_coding	1	18	18	18	9	8	3	0	8	16	6	6	8	9	8	3	0	8	16	6	6	8	9	8	3	0	8	16	6	6	8	36.8	36.8	36.8	59.421	517	517	1	71	0	64.739	24.4	22.8	8.7
Tb927.10.14930	Tb927.10.14930	10	10	10	Tb927.10.14930 | organism=Trypanosoma_brucei_TREU927 | product=zinc finger protein family member, putative (ZC3H39) | location=Tb927_10_v5.1:3649025-3649882(+) | length=285 | sequence_SO=chromosome | SO=protein_coding	1	10	10	10	7	7	4	0	0	0	7	10	2	7	7	4	0	0	0	7	10	2	7	7	4	0	0	0	7	10	2	42.8	42.8	42.8	31.519	285	285	1	45	0	105.64	36.8	36.8	22.8
Tb927.10.14950	Tb927.10.14950	16	16	16	Tb927.10.14950 | organism=Trypanosoma_brucei_TREU927 | product=RNA binding protein, putative,zinc finger protein family member, putative (ZC3H40) | location=Tb927_10_v5.1:3654477-3655775(+) | length=432 | sequence_SO=chromosome | SO=protein_coding	1	16	16	16	9	13	6	0	0	0	9	16	3	9	13	6	0	0	0	9	16	3	9	13	6	0	0	0	9	16	3	55.1	55.1	55.1	46.194	432	432	1	61	0	99.356	30.8	43.5	19.2
Tb927.10.1510	Tb927.10.1510	5	5	5	Tb927.10.1510 | organism=Trypanosoma_brucei_TREU927 | product=NOT1 (NOT1) | location=Tb927_10_v5.1:405276-412256(-) | length=2326 | sequence_SO=chromosome | SO=protein_coding	1	5	5	5	0	0	0	1	1	3	0	0	0	0	0	0	1	1	3	0	0	0	0	0	0	1	1	3	0	0	0	3.5	3.5	3.5	259.12	2326	2326	1	5	0	5.8248	0	0	0
Tb927.2.5910;Tb927.10.15120	Tb927.2.5910;Tb927.10.15120	2;2	2;2	2;2	Tb927.2.5910 | organism=Trypanosoma_brucei_TREU927 | product=40S ribosomal protein S13, putative | location=Tb927_02_v5.1:1077046-1077501(+) | length=151 | sequence_SO=chromosome | SO=protein_coding;Tb927.10.15120 | organism=Trypanosoma_brucei_TREU927 | pr	2	2	2	2	0	0	0	0	0	0	0	0	2	0	0	0	0	0	0	0	0	2	0	0	0	0	0	0	0	0	2	10.6	10.6	10.6	17.309	151	151;151	1	3	0	2.8896	0	0	0
Tb927.10.15180	Tb927.10.15180	1	1	1	Tb927.10.15180 | organism=Trypanosoma_brucei_TREU927 | product=nucleosome assembly protein, putative | location=Tb927_10_v5.1:3702340-3703440(+) | length=366 | sequence_SO=chromosome | SO=protein_coding	1	1	1	1	1	1	1	0	0	0	0	0	0	1	1	1	0	0	0	0	0	0	1	1	1	0	0	0	0	0	0	3.3	3.3	3.3	41.302	366	366	1	3	0	2.365	3.3	3.3	3.3
Tb927.10.15310;REV__Tb927.10.2600	Tb927.10.15310	6;1	6;1	6;1	Tb927.10.15310 | organism=Trypanosoma_brucei_TREU927 | product=hypothetical protein, conserved | location=Tb927_10_v5.1:3745784-3747139(+) | length=451 | sequence_SO=chromosome | SO=protein_coding	2	6	6	6	3	2	6	0	0	0	0	0	0	3	2	6	0	0	0	0	0	0	3	2	6	0	0	0	0	0	0	15.5	15.5	15.5	47.654	451	451;584	1	11	0	18.306	7.3	5.5	15.5
Tb927.10.15330;Tb11.v5.0348	Tb927.10.15330;Tb11.v5.0348	7;6	7;6	7;6	Tb927.10.15330 | organism=Trypanosoma_brucei_TREU927 | product=hypothetical protein, conserved | location=Tb927_10_v5.1:3753481-3755298(+) | length=605 | sequence_SO=chromosome | SO=protein_coding;Tb11.v5.0348 | organism=Trypanosoma_brucei_TREU927 | produc	2	7	7	7	0	0	0	0	0	0	4	3	4	0	0	0	0	0	0	4	3	4	0	0	0	0	0	0	4	3	4	17.2	17.2	17.2	68.478	605	605;571	1	11	0	14.327	0	0	0
Tb927.10.1540	Tb927.10.1540	7	7	7	Tb927.10.1540 | organism=Trypanosoma_brucei_TREU927 | product=zinc finger protein family member, putative (ZC3H30) | location=Tb927_10_v5.1:420118-421812(-) | length=564 | sequence_SO=chromosome | SO=protein_coding	1	7	7	7	4	3	4	0	0	0	2	0	0	4	3	4	0	0	0	2	0	0	4	3	4	0	0	0	2	0	0	17.9	17.9	17.9	60.136	564	564	1	13	0	15.474	8.7	6	10.6
Tb927.10.1550	Tb927.10.1550	1	1	1	Tb927.10.1550 | organism=Trypanosoma_brucei_TREU927 | product=proteasome regulatory non-ATP-ase subunit 5,19S proteasome regulatory subunit (RPN5) | location=Tb927_10_v5.1:425467-426915(-) | length=482 | sequence_SO=chromosome | SO=protein_coding	1	1	1	1	1	0	0	0	0	0	0	0	0	1	0	0	0	0	0	0	0	0	1	0	0	0	0	0	0	0	0	4.4	4.4	4.4	54.896	482	482	1	1	0.0016502	2.0955	4.4	0	0
Tb927.10.15720	Tb927.10.15720	4	4	4	Tb927.10.15720 | organism=Trypanosoma_brucei_TREU927 | product=proteasome regulatory non-ATP-ase subunit 9,19S proteasome regulatory subunit (RPN9) | location=Tb927_10_v5.1:3869048-3870265(+) | length=405 | sequence_SO=chromosome | SO=protein_coding	1	4	4	4	3	1	0	0	0	2	0	0	0	3	1	0	0	0	2	0	0	0	3	1	0	0	0	2	0	0	0	13.3	13.3	13.3	45.989	405	405	1	6	0	4.4368	10.1	2.5	0
Tb927.10.15760	Tb927.10.15760	2	2	2	Tb927.10.15760 | organism=Trypanosoma_brucei_TREU927 | product=hypothetical protein, conserved | location=Tb927_10_v5.1:3895573-3896520(+) | length=315 | sequence_SO=chromosome | SO=protein_coding	1	2	2	2	2	0	0	0	0	0	0	0	0	2	0	0	0	0	0	0	0	0	2	0	0	0	0	0	0	0	0	14.9	14.9	14.9	36.411	315	315	1	2	0	6.5556	14.9	0	0
Tb927.10.15870	Tb927.10.15870	1	1	1	Tb927.10.15870 | organism=Trypanosoma_brucei_TREU927 | product=RNA binding protein, putative | location=Tb927_10_v5.1:3914983-3915708(+) | length=241 | sequence_SO=chromosome | SO=protein_coding	1	1	1	1	0	0	0	0	0	0	0	0	1	0	0	0	0	0	0	0	0	1	0	0	0	0	0	0	0	0	1	8.3	8.3	8.3	26.919	241	241	1	1	0	2.6524	0	0	0
Tb927.9.15210;Tb927.10.1590	Tb927.9.15210;Tb927.10.1590	2;2	2;2	2;2	Tb927.9.15210 | organism=Trypanosoma_brucei_TREU927 | product=ribosomal protein L36, putative | location=Tb927_09_v5.1:2362520-2362849(+) | length=109 | sequence_SO=chromosome | SO=protein_coding;Tb927.10.1590 | organism=Trypanosoma_brucei_TREU927 | produc	2	2	2	2	0	1	1	0	0	0	1	0	2	0	1	1	0	0	0	1	0	2	0	1	1	0	0	0	1	0	2	21.1	21.1	21.1	12.457	109	109;109	1	6	0	6.0309	0	12.8	12.8
Tb927.10.16070	Tb927.10.16070	1	1	1	Tb927.10.16070 | organism=Trypanosoma_brucei_TREU927 | product=eukaryotic translation initiation factor 4e, putative | location=Tb927_10_v5.1:3954052-3954807(+) | length=251 | sequence_SO=chromosome | SO=protein_coding	1	1	1	1	0	0	0	0	0	0	0	1	0	0	0	0	0	0	0	0	1	0	0	0	0	0	0	0	0	1	0	5.6	5.6	5.6	28.299	251	251	1	1	1	-2	0	0	0
Tb927.10.1610	Tb927.10.1610	1	1	1	Tb927.10.1610 | organism=Trypanosoma_brucei_TREU927 | product=hypothetical protein, conserved | location=Tb927_10_v5.1:438154-438597(-) | length=147 | sequence_SO=chromosome | SO=protein_coding	1	1	1	1	0	0	0	0	0	0	0	0	1	0	0	0	0	0	0	0	0	1	0	0	0	0	0	0	0	0	1	12.2	12.2	12.2	16.358	147	147	1	1	0	3.6722	0	0	0
Tb927.10.16120	Tb927.10.16120	45	45	45	Tb927.10.16120 | organism=Trypanosoma_brucei_TREU927 | product=inosine-5-monophosphate dehydrogenase,IMP dehydrogenase | location=Tb927_10_v5.1:3965348-3966691(+) | length=447 | sequence_SO=chromosome | SO=protein_coding	1	45	45	45	40	37	38	2	2	7	37	37	32	40	37	38	2	2	7	37	37	32	40	37	38	2	2	7	37	37	32	84.8	84.8	84.8	48.481	447	447	1	452	0	323.31	78.1	76.5	83
Tb927.10.170	Tb927.10.170	14	14	14	Tb927.10.170 | organism=Trypanosoma_brucei_TREU927 | product=pseudouridine synthase, Cbf5p | location=Tb927_10_v5.1:70843-72126(+) | length=427 | sequence_SO=chromosome | SO=protein_coding	1	14	14	14	6	12	3	0	0	0	4	6	4	6	12	3	0	0	0	4	6	4	6	12	3	0	0	0	4	6	4	32.6	32.6	32.6	48.285	427	427	1	36	0	32.701	16.6	28.8	8.4
Tb927.10.190	Tb927.10.190	6	6	3	Tb927.10.190 | organism=Trypanosoma_brucei_TREU927 | product=40S ribosomal protein S6, putative | location=Tb927_10_v5.1:73558-74310(+) | length=250 | sequence_SO=chromosome | SO=protein_coding	1	6	6	3	0	0	0	0	0	0	0	0	6	0	0	0	0	0	0	0	0	6	0	0	0	0	0	0	0	0	3	26.8	26.8	11.2	28.44	250	250	1	7	0	44.382	0	0	0
Tb927.10.1930	Tb927.10.1930	1	1	1	Tb927.10.1930 | organism=Trypanosoma_brucei_TREU927 | product=hypothetical protein, conserved | location=Tb927_10_v5.1:504445-506388(+) | length=647 | sequence_SO=chromosome | SO=protein_coding	1	1	1	1	1	0	0	0	0	0	0	0	0	1	0	0	0	0	0	0	0	0	1	0	0	0	0	0	0	0	0	2	2	2	74.392	647	647	1	1	0.0091743	1.5438	2	0	0
Tb927.10.200	Tb927.10.200	1	1	1	Tb927.10.200 | organism=Trypanosoma_brucei_TREU927 | product=vacuolar ATP synthase, putative | location=Tb927_10_v5.1:74522-75097(+) | length=191 | sequence_SO=chromosome | SO=protein_coding	1	1	1	1	1	0	1	0	0	0	1	1	1	1	0	1	0	0	0	1	1	1	1	0	1	0	0	0	1	1	1	7.9	7.9	7.9	19.38	191	191	1	5	0.0016287	1.9951	7.9	0	7.9
Tb927.10.2010	Tb927.10.2010	19	2	1	Tb927.10.2010 | organism=Trypanosoma_brucei_TREU927 | product=hexokinase (HK1) | location=Tb927_10_v5.1:526772-528187(+) | length=471 | sequence_SO=chromosome | SO=protein_coding	1	19	2	1	19	14	13	0	0	7	3	3	8	2	2	2	0	0	2	0	0	1	1	1	1	0	0	1	0	0	1	48.8	7.4	3.8	51.295	471	471	1	9	0	15.331	48.8	44.2	38.4
Tb927.10.2020	Tb927.10.2020	19	19	0	Tb927.10.2020 | organism=Trypanosoma_brucei_TREU927 | product=hexokinase (HK2) | location=Tb927_10_v5.1:529818-531233(+) | length=471 | sequence_SO=chromosome | SO=protein_coding	1	19	19	0	19	14	13	0	1	6	3	3	7	19	14	13	0	1	6	3	3	7	0	0	0	0	0	0	0	0	0	45.6	45.6	0	51.148	471	471	1	68	0	207.63	45.6	41	35.2
Tb927.10.6370;Tb927.10.220	Tb927.10.6370;Tb927.10.220	1;1	1;1	1;1	Tb927.10.6370 | organism=Trypanosoma_brucei_TREU927 | product=60S ribosomal proteins L37, putative | location=Tb927_10_v5.1:1612318-1612599(-) | length=93 | sequence_SO=chromosome | SO=protein_coding;Tb927.10.220 | organism=Trypanosoma_brucei_TREU927 | pro	2	1	1	1	0	1	1	0	0	0	1	0	1	0	1	1	0	0	0	1	0	1	0	1	1	0	0	0	1	0	1	19.4	19.4	19.4	10.458	93	93;93	1	4	0	10.903	0	19.4	19.4
Tb927.10.2240	Tb927.10.2240	22	22	22	Tb927.10.2240 | organism=Trypanosoma_brucei_TREU927 | product=hypothetical protein, conserved | location=Tb927_10_v5.1:578334-580100(+) | length=588 | sequence_SO=chromosome | SO=protein_coding	1	22	22	22	14	16	15	0	0	0	18	18	5	14	16	15	0	0	0	18	18	5	14	16	15	0	0	0	18	18	5	40.5	40.5	40.5	66.352	588	588	1	100	0	323.31	30.6	32	32.1
Tb927.10.2320	Tb927.10.2320	8	8	8	Tb927.10.2320 | organism=Trypanosoma_brucei_TREU927 | product=hypothetical protein, conserved | location=Tb927_10_v5.1:599823-600968(+) | length=381 | sequence_SO=chromosome | SO=protein_coding	1	8	8	8	6	4	6	0	0	0	0	0	0	6	4	6	0	0	0	0	0	0	6	4	6	0	0	0	0	0	0	36.7	36.7	36.7	41.178	381	381	1	19	0	135.13	27.8	20.5	25.7
Tb927.10.2370	Tb927.10.2370	13	13	13	Tb927.10.2370 | organism=Trypanosoma_brucei_TREU927 | product=RNA-binding protein, putative (LA) | location=Tb927_10_v5.1:607374-608381(+) | length=335 | sequence_SO=chromosome | SO=protein_coding	1	13	13	13	12	8	7	0	0	0	3	4	2	12	8	7	0	0	0	3	4	2	12	8	7	0	0	0	3	4	2	51.9	51.9	51.9	37.659	335	335	1	44	0	70.585	46.3	39.1	33.4
Tb927.10.2530	Tb927.10.2530	1	1	1	Tb927.10.2530 | organism=Trypanosoma_brucei_TREU927 | product=adenylate kinase, putative | location=Tb927_10_v5.1:658114-658782(+) | length=222 | sequence_SO=chromosome | SO=protein_coding	1	1	1	1	0	0	0	0	0	0	0	0	1	0	0	0	0	0	0	0	0	1	0	0	0	0	0	0	0	0	1	6.3	6.3	6.3	24.941	222	222	1	1	0.0046584	1.6774	0	0	0
Tb927.10.2540	Tb927.10.2540	2	2	2	Tb927.10.2540 | organism=Trypanosoma_brucei_TREU927 | product=adenylate kinase, putative | location=Tb927_10_v5.1:660803-661492(+) | length=229 | sequence_SO=chromosome | SO=protein_coding	1	2	2	2	0	0	0	0	0	0	0	1	2	0	0	0	0	0	0	0	1	2	0	0	0	0	0	0	0	1	2	21.4	21.4	21.4	25.656	229	229	1	3	0	3.5143	0	0	0
Tb927.10.2640	Tb927.10.2640	1	1	1	Tb927.10.2640 | organism=Trypanosoma_brucei_TREU927 | product=intraflagellar transport protein IFT81, putative | location=Tb927_10_v5.1:681379-683601(+) | length=740 | sequence_SO=chromosome | SO=protein_coding	1	1	1	1	1	1	0	0	0	0	0	0	0	1	1	0	0	0	0	0	0	0	1	1	0	0	0	0	0	0	0	1.6	1.6	1.6	84.645	740	740	1	2	0.0016207	1.9744	1.6	1.6	0
Tb927.3.1370;Tb927.10.2840	Tb927.3.1370;Tb927.10.2840	8;8	8;8	8;8	Tb927.3.1370 | organism=Trypanosoma_brucei_TREU927 | product=40S ribosomal protein S25, putative | location=Tb927_03_v5.1:343637-343978(+) | length=113 | sequence_SO=chromosome | SO=protein_coding;Tb927.10.2840 | organism=Trypanosoma_brucei_TREU927 | produ	2	8	8	8	3	4	4	0	0	0	8	7	2	3	4	4	0	0	0	8	7	2	3	4	4	0	0	0	8	7	2	37.2	37.2	37.2	12.56	113	113;113	1	39	0	30.68	25.7	27.4	31.9
Tb927.10.2900;Tb11.v5.0837	Tb927.10.2900;Tb11.v5.0837	9;7	9;7	9;7	Tb927.10.2900 | organism=Trypanosoma_brucei_TREU927 | product=importin beta-1 subunit, putative | location=Tb927_10_v5.1:748683-751283(+) | length=866 | sequence_SO=chromosome | SO=protein_coding;Tb11.v5.0837 | organism=Trypanosoma_brucei_TREU927 | product	2	9	9	9	9	4	5	0	0	0	0	0	0	9	4	5	0	0	0	0	0	0	9	4	5	0	0	0	0	0	0	15.7	15.7	15.7	95.068	866	866;575	1	18	0	58.455	15.7	6	6.9
Tb927.10.3200	Tb927.10.3200	1	1	1	Tb927.10.3200 | organism=Trypanosoma_brucei_TREU927 | product=U2 splicing auxiliary factor, putative (U2AF35) | location=Tb927_10_v5.1:829453-830196(+) | length=247 | sequence_SO=chromosome | SO=protein_coding	1	1	1	1	0	1	1	0	0	0	0	0	0	0	1	1	0	0	0	0	0	0	0	1	1	0	0	0	0	0	0	6.5	6.5	6.5	29.114	247	247	1	2	0.0031949	1.8764	0	6.5	6.5
Tb927.10.3210	Tb927.10.3210	3	3	3	Tb927.10.3210 | organism=Trypanosoma_brucei_TREU927 | product=delta-1-pyrroline-5-carboxylate dehydrogenase, putative | location=Tb927_10_v5.1:831505-833190(+) | length=561 | sequence_SO=chromosome | SO=protein_coding	1	3	3	3	2	0	2	0	0	0	0	0	0	2	0	2	0	0	0	0	0	0	2	0	2	0	0	0	0	0	0	7.7	7.7	7.7	62.036	561	561	1	4	0	4.2911	4.8	0	5.5
Tb927.10.3380;Tb927.10.3370	Tb927.10.3380;Tb927.10.3370	2;2	2;2	2;2	Tb927.10.3380 | organism=Trypanosoma_brucei_TREU927 | product=60S acidic ribosomal protein P2, putative | location=Tb927_10_v5.1:873629-873973(+) | length=114 | sequence_SO=chromosome | SO=protein_coding;Tb927.10.3370 | organism=Trypanosoma_brucei_TREU927	2	2	2	2	1	1	1	0	0	0	2	2	1	1	1	1	0	0	0	2	2	1	1	1	1	0	0	0	2	2	1	14	14	14	11.535	114	114;114	1	8	0	4.5738	7.9	7.9	7.9
Tb927.10.3560	Tb927.10.3560	1	1	1	Tb927.10.3560 | organism=Trypanosoma_brucei_TREU927 | product=arginine N-methyltransferase, putative | location=Tb927_10_v5.1:921972-923141(+) | length=389 | sequence_SO=chromosome | SO=protein_coding	1	1	1	1	1	1	0	0	0	0	1	0	1	1	1	0	0	0	0	1	0	1	1	1	0	0	0	0	1	0	1	3.6	3.6	3.6	42.121	389	389	1	4	0.0016722	2.1484	3.6	3.6	0
Tb927.10.3660	Tb927.10.3660	6	6	6	Tb927.10.3660 | organism=Trypanosoma_brucei_TREU927 | product=aspartate aminotransferase | location=Tb927_10_v5.1:952692-953903(-) | length=403 | sequence_SO=chromosome | SO=protein_coding	1	6	6	6	5	4	3	0	0	3	1	2	5	5	4	3	0	0	3	1	2	5	5	4	3	0	0	3	1	2	5	17.9	17.9	17.9	44.787	403	403	1	24	0	20.825	14.9	12.2	8.2
Tb927.11.14130;Tb927.10.3840	Tb927.11.14130;Tb927.10.3840	5;5	5;5	5;5	Tb927.11.14130 | organism=Trypanosoma_brucei_TREU927 | product=ribosomal protein L18, putative | location=Tb927_11_v5.1:3745050-3745589(+) | length=179 | sequence_SO=chromosome | SO=protein_coding;Tb927.10.3840 | organism=Trypanosoma_brucei_TREU927 | produ	2	5	5	5	0	0	0	0	0	0	0	0	5	0	0	0	0	0	0	0	0	5	0	0	0	0	0	0	0	0	5	29.1	29.1	29.1	20.904	179	179;179	1	6	0	102.61	0	0	0
Tb927.10.3990	Tb927.10.3990	12	12	12	Tb927.10.3990 | organism=Trypanosoma_brucei_TREU927 | product=DHH1 (DHH1) | location=Tb927_10_v5.1:1055560-1056780(-) | length=406 | sequence_SO=chromosome | SO=protein_coding	1	12	12	12	7	8	5	1	4	6	7	5	6	7	8	5	1	4	6	7	5	6	7	8	5	1	4	6	7	5	6	39.9	39.9	39.9	46.468	406	406	1	49	0	43.85	24.9	24.4	17.2
Tb927.10.4120;Tb927.10.4110	Tb927.10.4120;Tb927.10.4110	10;10	10;10	10;10	Tb927.10.4120 | organism=Trypanosoma_brucei_TREU927 | product=60S ribosomal protein L30 (RPL30) | location=Tb927_10_v5.1:1082682-1082999(-) | length=105 | sequence_SO=chromosome | SO=protein_coding;Tb927.10.4110 | organism=Trypanosoma_brucei_TREU927 | prod	2	10	10	10	6	4	5	0	0	0	10	8	5	6	4	5	0	0	0	10	8	5	6	4	5	0	0	0	10	8	5	80	80	80	11.512	105	105;105	1	43	0	69.536	59	39	50.5
Tb927.10.4170	Tb927.10.4170	1	1	1	Tb927.10.4170 | organism=Trypanosoma_brucei_TREU927 | product=hypothetical protein, conserved | location=Tb927_10_v5.1:1091207-1098826(-) | length=2539 | sequence_SO=chromosome | SO=protein_coding	1	1	1	1	0	1	0	0	0	0	0	0	0	0	1	0	0	0	0	0	0	0	0	1	0	0	0	0	0	0	0	0.8	0.8	0.8	291.82	2539	2539	1	1	0.0016077	1.8982	0	0.8	0
Tb927.10.4570;Tb927.10.4560	Tb927.10.4570;Tb927.10.4560	39;39	39;39	39;39	Tb927.10.4570 | organism=Trypanosoma_brucei_TREU927 | product=elongation factor 2 | location=Tb927_10_v5.1:1166785-1169325(-) | length=846 | sequence_SO=chromosome | SO=protein_coding;Tb927.10.4560 | organism=Trypanosoma_brucei_TREU927 | product=elongation	2	39	39	39	37	21	31	0	3	20	10	11	23	37	21	31	0	3	20	10	11	23	37	21	31	0	3	20	10	11	23	54	54	54	94.333	846	846;846	1	172	0	279.38	51.1	33.6	43.4
Tb927.10.4950	Tb927.10.4950	2	2	2	Tb927.10.4950 | organism=Trypanosoma_brucei_TREU927 | product=U2 small nuclear ribonucleoprotein 16.5K | location=Tb927_10_v5.1:1230386-1230781(-) | length=131 | sequence_SO=chromosome | SO=protein_coding	1	2	2	2	0	0	0	0	0	0	0	2	0	0	0	0	0	0	0	0	2	0	0	0	0	0	0	0	0	2	0	20.6	20.6	20.6	14.743	131	131	1	2	0	4.7475	0	0	0
Tb927.10.4980	Tb927.10.4980	7	7	7	Tb927.10.4980 | organism=Trypanosoma_brucei_TREU927 | product=ubiquitin-like protein DSK2, putative (DSK2) | location=Tb927_10_v5.1:1237310-1238218(+) | length=302 | sequence_SO=chromosome | SO=protein_coding	1	7	7	7	0	0	2	0	0	1	6	6	6	0	0	2	0	0	1	6	6	6	0	0	2	0	0	1	6	6	6	43.4	43.4	43.4	32.186	302	302	1	25	0	323.31	0	0	11.3
Tb927.10.4990	Tb927.10.4990	4	4	4	Tb927.10.4990 | organism=Trypanosoma_brucei_TREU927 | product=cell division related protein kinase 2, putative,CDC2-related protein kinase (CRK3) | location=Tb927_10_v5.1:1238533-1239468(+) | length=311 | sequence_SO=chromosome | SO=protein_coding	1	4	4	4	0	0	0	0	2	2	0	2	0	0	0	0	0	2	2	0	2	0	0	0	0	0	2	2	0	2	0	13.5	13.5	13.5	35.017	311	311	1	6	0	4.9399	0	0	0
Tb927.10.5020	Tb927.10.5020	1	1	1	Tb927.10.5020 | organism=Trypanosoma_brucei_TREU927 | product=hypothetical protein, conserved | location=Tb927_10_v5.1:1245422-1246009(+) | length=195 | sequence_SO=chromosome | SO=protein_coding	1	1	1	1	1	1	1	0	0	0	0	1	0	1	1	1	0	0	0	0	1	0	1	1	1	0	0	0	0	1	0	5.6	5.6	5.6	21.98	195	195	1	4	0.0016779	2.181	5.6	5.6	5.6
Tb927.10.5030;Tb927.7.3680	Tb927.10.5030;Tb927.7.3680	3;3	3;3	3;3	Tb927.10.5030 | organism=Trypanosoma_brucei_TREU927 | product=ubiquitin/ribosomal protein S27a, putative | location=Tb927_10_v5.1:1246866-1247321(+) | length=151 | sequence_SO=chromosome | SO=protein_coding;Tb927.7.3680 | organism=Trypanosoma_brucei_TREU92	2	3	3	3	0	0	1	0	0	0	0	0	3	0	0	1	0	0	0	0	0	3	0	0	1	0	0	0	0	0	3	23.8	23.8	23.8	16.705	151	151;153	1	4	0	5.9688	0	0	8.6
[truncated: 476 more rows]
[truncated: 61 more columns]

## Sheet: MQParameters
Parameter	Value
Version	1.6.12.0
User name	MS-Service
Machine name	MS-MAXQUANT-PC
Date of writing	02/05/2021 17:57:28
Include contaminants	True
PSM FDR	0.01
PSM FDR Crosslink	0.01
Protein FDR	0.01
Site FDR	0.01
Use Normalized Ratios For Occupancy	True
Min. peptide Length	7
Min. score for unmodified peptides	0
Min. score for modified peptides	40
[truncated: 92 more rows]

## Sheet: Info
type	Total	A	B	C	D	E	F	G	H	I
[truncated: 4 more rows]

[truncated: 1 more sheets: filteredPeptides]
