# Supplementary material
Source: HighWire-hosted journal article supplement (doi:10.1101/rna.079258.122)
Supplement: Supplemental_Table_S3.xlsx [file Supplemental_Table_S3.xlsx]

## Sheet: compiled data
50 cells per slide
PROBE		1+3+4 long and medium					1+2+4 Long and short						LONG		SHORT
		C_WT	C_0H	D_12H	D_24H		A_WT	A_0H	B_12H	B_24H			CYT	NUC	CYT SM	NUC SM	SM cyti +DRBD18	long cyti -DRBD18	long nuci +DRBD18	long nuci -DRBD18
PINK RED GREEN (long)	Cytoplasm	88	78	31	10		86	87	13	11		WT	88	18	29	3	31	43	3	5
	Nucleus	18	23	18	39		18	24	34	28		0h	78	23	36	5	13	27	5	3
												WT B	86	18	30	4	10	38	4	9
PINK RED (short or medium)	Cytoplasm	29	36	43	27		30	33	38	50		0h B	87	24	33	8	11	50	8	18
	Nucleus	3	5	5	3		4	8	9	18		12 A	31	18	43	5
												12 B	13	34	38	9
PINK GREEN	Cytoplasm	4	4	3	1		6	1	5	4		24 A	10	39	27	3
	Nucleus	2	5	7	1		1	1		2		24 B	11	28	50	18
RED GREEN	Cytoplasm	13	5	2	7		8	8	5	1
	Nucleus			7	4				3				LONG		SHORT		LONG all	SHORT all
													cyt	nuc	cyt	nuc
RED only	Cytoplasm	27	54	36	26		22	34	26	34		WT	1.76	0.36	0.58	0.06	2.12	0.64
	Nucleus			3	3				1	1		0h	1.56	0.46	0.72	0.1	2.02	0.82
												WT B	1.72	0.36	0.6	0.08	2.08	0.68
PINK only	Cytoplasm	5	4	11	3		1	7	5	5		0h B	1.74	0.48	0.66	0.16	2.22	0.82
	Nucleus	26	28	39	16		8	4	18	13		12 A	0.62	0.36	0.86	0.1	0.98	0.96
												12 B	0.26	0.68	0.76	0.18	0.94	0.94
GREEN only	Cytoplasm	6		2	1		1		1	11		24 A	0.2	0.78	0.54	0.06	0.98	0.6
	Nucleus			5	2				3	3		24 B	0.22	0.56	1	0.36	0.78	1.36
												median no RNAi	1.73	0.41	0.63	0.09	2.1	0.75
Total long and short/medium		138	142	97	79		138	152	94	107		median + RNAi	0.24	0.62	0.81	0.14	0.96	0.95
Average long and short/medium per cell		2.76	2.84	1.94	1.58		2.76	3.04	1.88	2.14
Total long mRNAs		106	101	49	49		104	111	47	39		ttest +/- RNAi	0.000168013	0.138444	0.221594	0.349692	1.72987e-06	0.246635
Total short or medium mRNA		32	41	48	30		34	41	47	68
% short or medium mRNA		0.23	0.29	0.49	0.38		0.25	0.27	0.5	0.64
% long and short/medium in nucleus		0.15	0.2	0.24	0.53		0.16	0.21	0.46	0.43
% long in nucleus		0.17	0.23	0.37	0.8		0.17	0.22	0.72	0.72
% short or medium mRNA in nucleus		0.09	0.12	0.1	0.1		0.12	0.2	0.19	0.26
Total RNAs		221	242	207	141		185	207	158	178
PINK RED GREEN (long) %		0.48	0.42	0.24	0.35		0.56	0.54	0.3	0.22
PINK RED (short or medium) %		0.14	0.17	0.23	0.21		0.18	0.2	0.3	0.38
PINK GREEN %		0.03	0.04	0.05	0.01		0.04	0.01	0.03	0.03
RED GREEN %		0.06	0.02	0.01	0.05		0.04	0.04	0.03	0.01
RED only %		0.12	0.22	0.17	0.18		0.12	0.16	0.16	0.19
PINK only %		0.14	0.13	0.24	0.13		0.05	0.05	0.15	0.1
GREEN only %		0.03	0	0.03	0.02		0.01	0	0.03	0.08
Average number of RNAs with RBP10 CDS per cell		3.5	3.66	3.14	2		3.08	3.3	2.44	2.62

## Sheet: Slide A 0h
IMAGE		PINK	RED	GREEN	NUCLEUS?
Slide A 0H
D	CELL 1	X	X	X	YES
			X	X	NO
			X		NO
	CELL 2	X	X	X	NO
		X	X		NO
			X		NO
			X		NO
	CELL 3	X	X	X	NO
		X	X		NO
		X	X		NO
		X	X	X	NO
		X	X	X	NO
	CELLL 4	X	X	X	NO
		X	X	X	NO
		X	X	X	NO
		X	X	X	NO
			X		NO
			X	X	NO
		X			YES
	CELL 5	X	X	X	YES
		X	X		YES
		X	X	X	YES
		X	X	X	NO
		X	X	X	NO
		X	X		NO
			X		NO
			X		NO
	CELL 6	X	X	X	YES
		X	X	X	NO
		X	X	X	NO
		X	X		NO
		X	X		NO
	CELL 7	X	X	X	NO
		X	X	X	NO
		X	X	X	NO
		X	X		NO
		X	X		YES
	CELL 8	X	X	X	YES
		X	X	X	NO
	CELL 9	X	X	X	YES
		X	X		NO
			X		NO
	CELL 10	X	X	X	YES
		X	X	X	NO
		X	X	X	NO
		X	X		NO
		X	X		NO
		X	X		NO
	CELL 11	X	X	X	YES
		X	X		YES
		X	X	X	NO
		X	X	X	NO
		X	X	X	NO
		X	X	X	NO
	CELL 12	X	X	X	YES
		X	X	X	NO
			X	X	NO
		X	X		NO
			X		NO
			X		NO
	CELL 13	X	X	X	NO
		X	X	X	NO
		X	X		YES
		X	X		NO
		X	X		NO
		X	X		NO
E	CELL 1	X	X	X	YES
		X	X	X	YES
		X	X	X	NO
		X	X	X	NO
			X	X	NO
		X		X	NO
			X		NO
		X			YES
	CELL 2	X	X	X	YES
		X	X		NO
		X	X		NO
		X	X		NO
		X	X	X	NO
	CELL 3	X	X	X	NO
		X	X	X	NO
		X	X	X	NO
		X	X	X	NO
	CELL 4	X	X	X	YES
		X	X		NO
		X	X	X	NO
			X	X	NO
	CELL 5	X	X	X	YES
		X	X		NO
			X		NO
			X		NO
	CELL 6	X	X	X	YES
		X	X	X	NO
		X	X		NO
		X	X		NO
			X		NO
			X		NO
	CELL 7	X	X	X	YES
			X		YES
			X		NO
F	CELL 1	X	X	X	NO
		X	X	X	NO
		X	X	X	NO
		X	X	X	NO
		X	X		NO
	CELL 2	X	X	X	YES
		X	X	X	NO
		X	X		NO
		X	X		NO
	CELL 3	X	X	X	YES
		X	X	X	NO
	CELL 4	X	X	X	YES
		X			YES
		X	X	X	NO
		X	X		NO
		X		X	NO
G	CELL 1	X	X	X	NO
		X		X	YES
			X		NO
	CELL 2	X	X	X	YES
		X	X	X	NO
		X	X	X	NO
			X	X	NO
		X	X		NO
	CELL 3	X	X	X	NO
		X			YES
		X			NO
		X			NO
	CELL 4	X	X	X	NO
		X	X	X	NO
		X			NO
			X		NO
			X		NO
			X		NO
	CELL 5	X	X	X	NO
		X	X	X	NO
	CELL 6	X	X	X	NO
		X	X	X	NO
			X		NO
			X		NO
	CELL 7	X	X	X	NO
		X	X	X	NO
		X	X	X	NO
	CELL 8	X	X	X	NO
		X	X		NO
	CELL 9	X	X	X	YES
		X	X		YES
			X	X	NO
	CELL 10	X	X		YES
H	CELL 1	X	X	X	YES
		X	X	X	NO
		X	X	X	NO
		X	X	X	NO
		X	X		NO
		X	X		NO
	CELL 2	X	X	X	NO
		X	X	X	NO
		X	X	X	NO
		X	X	X	NO
		X			YES
			X		NO
	CELL 3	X	X	X	NO
		X	X	X	NO
			X	X	NO
				X	NO
			X	X	NO
	CELL 4	X	X		YES
		X			YES
		X	X	X	NO
			X	X	NO
			X	X	NO
	CELL 5	X	X		YES
		X	X		NO
		X	X		NO
			X		NO
			X		NO
	CELL 6	X	X	X	YES
			X		NO
			X		NO
			X		NO
I	CELL 1	X			YES
		X	X	X	NO
		X	X	X	NO
		X	X	X	NO
	CELL 2	X	X		YES
		X			YES
		X	X	X	NO
		X	X	X	NO
		X	X		NO
		X			NO
			X		NO
			X		NO
	CELL 3	X	X	X	NO
	CELL 4	X	X	X	NO
		X	X		YES
		X	X	X	NO
		X	X		NO
	CELL 5	X	X	X	NO
	CELL 6	X	X	X	NO
		X	X	X	NO
			X	X	NO
			X	X	NO
			X	X	NO
				X	NO
	CELL 7	X	X	X	YES
		X	X	X	NO
		X	X	X	NO
		X	X	X	NO
		X	X	X	NO
		X	X	X	NO
	CELL 8	X	X	X	NO
		X	X	X	NO
J	CELL 1	X	X	X	NO
		X	X	X	NO
		X	X	X	NO
		X	X		NO
		X	X		NO
			X		NO
			X		NO
	CELL 2	X	X	X	NO
		X	X		YES
		X	X		NO
			X		NO
				X	NO
		X			NO
			X		NO
			X		NO
			X		NO

## Sheet: Slide A WT
IMAGE		PINK	RED	GREEN	NUCLEUS?
Slide A WT
C	CELL 1	X	X	X	NO
		X			NO
		X			NO
	CELL 2	X	X	X	NO
		X	X	X	NO
		X	X	X	NO
		X	X		NO
		X			YES
	CELL 3	X	X	X	YES
		X	X	X	NO
		X	X	X	NO
		X	X	X	NO
		X	X	X	NO
	CELL 4	X	X	X	NO
		X	X	X	NO
		X	X	X	NO
		X	X		NO
		X			NO
	CELL 5	X	X	X	NO
		X	X	X	NO
		X	X	X	NO
		X	X		NO
		X	X		YES
		X		X	NO
			X	X	NO
	CELL 6	X	X	X	NO
		X	X	X	NO
		X			YES
			X		NO
			X		NO
D	CELL 1	X	X	X	NO
		X	X	X	NO
		X	X		NO
		X	X		NO
		X	X		NO
			X		NO
			X		NO
	CELL 2	X	X	X	NO
		X	X	X	NO
		X	X	X	NO
			X		NO
		X		X	YES
	CELL 3	X	X	X	NO
		X	X	X	NO
		X	X	X	NO
		X			YES
		X	X		NO
			X	X	NO
		X			NO
		X			NO
	CELL 4	X	X	X	NO
		X	X	X	NO
		X	X		NO
			X		NO
			X		NO
	CELL 5	X	X	X	NO
		X	X	X	NO
		X	X	X	NO
		X	X		NO
	CELL 6	X	X	X	NO
		X	X	X	NO
		X	X	X	YES
		X	X	X	NO
		X	X		NO
E	CELL 1	X	X	X	NO
		X	X	X	NO
		X	X	X	NO
		X			NO
	CELL 2	X	X		YES
		X	X	X	NO
		X	X	X	NO
		X	X	X	NO
		X	X		NO
	CELL 3	X	X		YES
		X	X	X	NO
			X		NO
	CELL 4	X	X	X	NO
		X	X	X	NO
		X	X	X	NO
	CELL 5	X	X	X	NO
		X	X	X	NO
			X	X	YES
		X	X		NO
		X	X		NO
		X			NO
F	CELL 1	X	X	X	NO
		X	X	X	NO
		X	X	X	NO
		X	X	X	NO
	CELL 2	X	X	X	YES
			X	X	YES
		X	X		NO
			X		NO
			X		NO
	CELL 3	X	X	X	YES
		X	X	X	NO
		X	X	X	NO
		X	X	X	NO
			X	X	NO
	CELL 4	X	X	X	NO
			X		NO
	CELL 5	X	X	X	NO
		X	X	X	NO
		X	X		YES
		X	X		NO
	CELL 6	X	X		YES
G	CELL 1	X	X	X	NO
		X	X	X	NO
		X	X	X	NO
		X	X		NO
	CELL 2	X		X	YES
		X	X	X	NO
		X	X	X	NO
		X	X		NO
		X	X		NO
			X	X	NO
	CELL 3	X	X	X	NO
		X	X	X	NO
		X		X	NO
		X		X	NO
			X		NO
	CELL 4	X	X	X	NO
			X		NO
	CELL 5	X	X	X	YES
		X	X		YES
		X	X	X	NO
		X	X	X	NO
		X	X		NO
			X	X	NO
H	CELL 1	X	X	X	YES
		X	X	X	NO
		X	X	X	NO
		X	X	X	NO
		X	X	X	NO
		X	X		NO
	CELL 2	X	X	X	NO
		X	X	X	NO
		X	X	X	NO
		X		X	NO
			X		NO
	CELL 3	X	X	X	NO
		X	X	X	NO
		X	X	X	NO
		X	X	X	NO
		X		X	NO
	CELL 4	X	X		YES
		X	X	X	NO
		X	X	X	NO
		X	X	X	NO
		X		X	NO
	CELL 5	X	X	X	YES
		X	X	X	NO
		X	X	X	NO
		X	X	X	NO
		X	X	X	NO
I	CELL 1	X	X		YES
		X	X	X	NO
			X	X	NO
				X	NO
	CELL 2	X	X	X	YES
		X	X	X	NO
		X	X	X	NO
		X			YES
			X		NO
	CELL 3	X	X	X	YES
		X	X		NO
	CELL 4	X	X	X	NO
		X	X		YES
			X	X	NO
			X	X	NO
	CELL 5	X	X	X	NO
		X	X	X	NO
		X	X	X	NO
		X	X	X	NO
	CELL 6	X	X	X	NO
		X	X		YES
		X	X		NO
J	CELL 1	X	X		YES
		X	X		NO
		X	X	X	NO
		X	X	X	NO
		X	X	X	NO
	CELL 2	X	X	X	YES
		X	X	X	NO
		X			NO
			X		NO
	CELL 3	X			YES
		X	X	X	NO
		X	X	X	NO
		X	X		NO
	CELL 4	X	X	X	NO
			X		NO
		X			NO
	CELL 5	X	X	X	NO
		X	X	X	NO
		X	X	X	NO
	CELL 6	X	X	X	YES
		X	X	X	NO
		X	X	X	NO
		X	X	X	NO
K	CELL 1	X	X	X	YES
		X	X	X	YES
			X		NO
	CELL 2	X	X	X	YES
		X	X	X	NO
		X	X	X	NO
		X			NO
			X		NO
	CELL 3	X	X	X	YES
			X	X	NO
		X			NO
	CELL 4	X	X	X	NO
			X	X	NO
			X		NO
			X		NO
			X		NO
	CELL 5	X	X	X	NO
			X	X	NO
			X		NO

## Sheet: Slide B 12H
IMAGE		PINK	RED	GREEN	NUCLEUS?
Slide B 12H
E	CELL 1	X	X	X	YES
		X	X	X	YES
		X	X		NO
	CELL 2	X	X	X	YES
		X	X		YES
		X	X		NO
	CELL 3	X	X	X	YES
		X			NO
F	CELL 4	X	X	X	NO
	CELL 5	X	X	X	NO
		X		X	NO
		X	X		NO
		X	X		NO
G	CELL 6	X			YES
		X			NO
			X	X	NO
	CELL 7	X	X	X	YES
		X	X	X	NO
		X	X		NO
		X	X		NO
		X	X		NO
			X		NO
	CELL 8	X	X	X	YES
		X	X	X	YES
		X	X	X	YES
		X	X		NO
	CELL 9	X	X	X	YES
		X	X		NO
		X			NO
H	CELL 10	X	X	X	YES
		X	X		NO
		X			NO
	CELL 11	X	X	X	NO
		X			YES
			X		NO
		X			NO
		X			NO
	CELL 12	X	X	X	YES
		X	X		YES
	CELL 13	X	X	X	YES
		X	X		NO
	CELL 14	X	X	X	YES
		X	X		YES
			X		NO
	CELL 15	X	X	X	YES
I	CELL 16	X	X	X	YES
		X	X		NO
		X	X		NO
		X	X		NO
			X		NO
	CELL 17			X	YES
		X	X		NO
			X		NO
	CELL 18	X	X	X	YES
		X	X		NO
	CELL 19	X	X	X	YES
		X	X		NO
		X	X	X	NO
		X	X		NO
	CELL 20	X	X	X	YES
		X	X	X	YES
			X		NO
J	CELL 21	X	X	X	YES
		X	X		NO
		X			NO
			X		NO
			X		NO
			X		NO
			X		NO
	CELL 22	X	X	X	YES
			X	X	YES
		X	X		NO
		X			NO
		X			NO
	CELL 23	X	X	X	NO
		X	X	X	NO
			X		NO
				X	YES
	CELL 24	X	X	X	YES
		X	X		NO
		X	X		NO
		X			NO
			X		NO
	CELL 25	X	X	X	YES
		X	X		NO
	CELL 26	X	X		YES
			X		NO
		X	X		NO
	CELL 27	X	X	X	NO
		X	X	X	NO
				X	YES
			X		NO
	CELL 28	X	X	X	YES
		X	X		YES
		X	X		NO
		X	X		NO
	CELL 29	X	X	X	YES
		X	X		NO
			X		NO
		X			NO
	CELL 30			X	YES
		X	X		NO
			X		NO
			X		NO
			X		NO
K	CELL 31	X	X	X	YES
		X	X		NO
		X	X		NO
			X		NO
		X			NO
	CELL 32	X	X	X	NO
		X	X	X	NO
		X	X	X	NO
		X			YES
	CELL 33	X	X	X	YES
		X	X		NO
	CELL 34	X	X	X	YES
		X	X		NO
		X	X		NO
		X			NO
			X		NO
	CELL 35	X	X	X	YES
		X	X		NO
			X		NO
L	CELL 36	X	X		YES
			X	X	YES
		X			NO
	CELL 37	X	X		YES
		X	X		At the edge
				X	At the edge
		X	X		NO
	CELL 38	X	X		YES
				X	YES
			X		NO
			X		NO
	CELL 39	X	X	X	NO
		X			NO
			X		NO
	CELL 40	X	X		YES
		X	X		NO
		X	X		NO
		X	X		NO
			X		NO
M	CELL 41	X	X	X	NO
		X		X	NO
			X	X	YES
	CELL 42	X			NO
			X	X	NO
	CELL 43	X	X	X	YES
		X			YES
	CELL 44	X	X		YES
			X	X	NO
N	CELL 45	X	X	X	YES
		X			YES
			X		YES
		X	X		NO
	CELL 46	X	X	X	YES
		X	X		YES
			X		YES
		X			NO
		X		X	NO
	CELL 47	X	X	X	YES
			X		NO
	CELL 48	X		X	NO
		X	X		YES
	CELL 49	X	X	X	YES
		X		X	NO
			X	X	NO
			X	X	NO
			X		NO
		X			NO
	CELL 50	X	X	X	YES
			X	X	YES

## Sheet: Slide B 24H
IMAGE		PINK	RED	GREEN	NUCLEUS?
Slide B 24 H
D	CELL 1	X	X		YES
		X	X		YES
		X	X		NO
			X		NO
			X		NO
	CELL 2	X	X	X	YES
		X		X	NO
			X		NO
		X			NO
	CELL 3	X	X	X	YES
		X	X		YES
	CELL 4	X	X	X	YES
		X	X		NO
		X	X		NO
		X		X	NO
			X		YES
E	CELL 5	X	X		NO
		X			YES
	CELL 6	X	X	X	NO
		X			NO
		X			NO
	CELL 7	X	X		YES
	CELL 8	X	X		NO
		X			NO
		X			NO
			X		NO
			X		NO
	CELL 9			X	YES
				X	NO
F	CELL 10	X	X	X	YES
		X	X		NO
		X	X		NO
			X	X	NO
			X		NO
	CELL 11	X	X	X	YES
		X	X	X	YES
	CELL 12	X	X	X	YES
			X		NO
			X		NO
			X		NO
			X		NO
			X		NO
G	CELL 13	X	X		NO
		X	X		NO
				X	YES
	CELL 14	X	X	X	YES
		X	X		YES
		X	X	X	YES
		X	X		YES
				X	NO
	CELL 15	X	X		YES
		X	X		NO
		X	X		NO
	CELL 16	X	X	X	NO
		X	X		At the edge
			X		NO
			X		NO
				X	NO
	CELL 17	X	X	X	NO
		X	X	X	NO
	CELL 18		X	X	NO
		X	X		YES
H	CELL 19	X	X	X	YES
		X	X		NO
		X	X		NO
		X		X	NO
	CELL 20	X	X	X	YES
		X	X		YES
	CELL 21	X	X	X	NO
				X	YES
				X	NO
I	CELL 22	X	X	X	YES
		X	X		YES
		X	X		NO
			X		NO
			X		NO
	CELL 23			X	YES
		X	X		NO
		X	X		NO
			X		NO
	CELL 24	X	X	X	YES
		X	X		NO
			X		NO
			X		NO
			X		NO
			X		NO
			X		NO
		X			NO
		X			NO
		X			NO
	CELL 25	X			YES
			X		NO
			X		NO
		X			NO
J	CELL 26	X	X	X	YES
		X	X		NO
		X	X		NO
			X		NO
	CELL 27	X	X	X	NO
		X	X		NO
		X	X		NO
K	CELL 28	X	X	X	YES
				X	YES
			X		NO
		X			NO
		X	X		NO
	CELL 29	X	X	X	YES
		X		X	YES
		X	X		NO
		X	X		NO
		X	X		NO
	CELL 30	X	X	X	YES
		X	X		NO
		X			NO
		X			NO
L	CELL 31	X	X	X	YES
		X	X		YES
	CELL 32	X	X	X	NO
		X	X		NO
				X	YES
				X	YES
	CELL 33	X	X		NO
		X			NO
		X			YES
		X			YES
			X		NO
			X		NO
			X		NO
	CELL 34	X	X	X	NO
		X	X	X	NO
		X			YES
A	CELL 35	X	X		NO
		X	X		NO
				X	NO
	CELL 36			X	YES
		X		X	YES
		X	X		NO
			X		NO
		X	X		NO
	CELL 37	X	X		YES
		X	X		NO
		X	X		NO
				X	NO
	CELL 38	X	X	X	YES
		X	X		NO
		X	X		NO
		X	X		NO
	CELL 39	X	X	X	YES
		X	X		NO
		X	X		NO
B	CELL 40	X	X	X	YES
		X	X	X	NO
		X		X	NO
			X		NO
		X	X		NO
		X	X		NO
	CELL 41	X	X	X	YES
		X	X		YES
				X	NO
				X	NO
			X		NO
	CELL 42	X	X	X	YES
		X	X		YES
		X	X		NO
		X			NO
	CELL 43	X	X		NO
		X	X		NO
		X	X		NO
	CELL 44	X	X	X	NO
		X	X		NO
	CELL 45	X	X	X	YES
			X		YES
			X		NO
		X	X		NO
			X		NO
C	CELL 46	X	X	X	At the edge
		X	X	X	YES
		X			NO
			X		NO
	CELL 47	X	X		YES
		X	X		YES
		X	X		NO
				X	NO
				X	NO
				X	NO
	CELL 48	X	X	X	YES
		X	X		YES
	CELL 49	X	X	X	YES
		X	X		YES
		X	X		NO
		X	X		NO
	CELL 50	X	X	X	YES
		X	X		NO
		X	X		NO

## Sheet: Slide C 0H
IMAGE		PINK	RED	GREEN	NUCLEUS?
Slide C 0H
C	CELL 1	X	X	X	NO
		X	X	X	NO
		X	X		YES
		X		X	YES
		X			YES
	CELL 2	X	X	X	YES
		X	X		YES
		X	X	X	NO
	CELL 3	X	X	X	NO
		X	X		NO
		X	X		NO
		X	X		NO
			X		NO
			X		NO
D	CELL 4	X	X	X	YES
		X	X	X	NO
		X	X		NO
			X		NO
			X		NO
			X		NO
			X		NO
	CELL 5	X	X	X	NO
		X	X	X	NO
		X	X	X	NO
		X	X		NO
		X	X		NO
		X	X		NO
		X			NO
		X			NO
	CELL 6	X	X	X	NO
		X	X	X	NO
		X	X	X	NO
		X	X		NO
			X		NO
			X		NO
			X		NO
			X		NO
			X		NO
	CELL 7	X	X	X	NO
		X	X	X	NO
		X	X	X	NO
		X	X	X	NO
		X	X		NO
E	CELL 8	X	X	X	NO
		X	X	X	NO
		X	X	X	NO
		X	X	X	NO
		X		X	YES
		X	X		YES
		X	X		NO
		X			NO
	CELL 9	X	X	X	NO
		X	X		NO
		X			NO
			X		NO
			X		NO
			X		NO
	CELL 10	X	X	X	NO
		X	X		NO
		X		X	NO
			X		NO
	CELL 11	X	X	X	NO
		X	X	X	NO
		X			NO
		X			NO
			X		NO
			X		NO
F	CELL 12	X	X	X	NO
		X	X	X	NO
		X			YES
		X	X		NO
		X			NO
			X		NO
			X		NO
			X		NO
	CELL 13	X	X	X	YES
		X	X	X	NO
		X	X	X	NO
		X	X		NO
		X	X		NO
			X		NO
			X		NO
			X		NO
			X		NO
			X		NO
			X		NO
	CELL 14	X	X	X	NO
			X	X	NO
		X	X		NO
	CELL 15	X	X	X	YES
			X		NO
			X		NO
			X		NO
			X		NO
	CELL 16	X	X	X	YES
		X	X		YES
		X	X		NO
	CELL 17	X	X	X	YES
		X	X		NO
G	CELL 18	X	X	X	NO
		X	X	X	NO
		X	X		NO
	CELL 19	X	X	X	NO
		X	X	X	NO
		X	X	X	NO
		X	X	X	YES
	CELL 20	X	X	X	NO
		X	X	X	NO
		X	X	X	NO
		X	X	X	NO
		X	X	X	YES
	CELL 21	X	X	X	YES
			X		NO
			X		NO
			X		NO
	CELL 22	X	X	X	NO
		X	X	X	NO
		X	X		YES
		X			NO
			X		NO
	CELL 23	X	X	X	YES
		X	X	X	NO
	CELL 24	X	X	X	NO
		X	X		NO
		X			YES
	CELL 25	X	X	X	NO
		X	X	X	NO
		X	X	X	NO
		X	X		NO
		X			NO
		X			NO
H	CELL 26	X	X	X	YES
		X	X	X	NO
			X	X	NO
	CELL 27	X	X	X	NO
		X	X	X	NO
		X	X		NO
	CELL 28	X	X	X	YES
		X		X	YES
		X			NO
	CELL 29	X	X	X	YES
		X			YES
			X		NO
			X		NO
			X		NO
I	CELL 30	X	X	X	YES
		X	X		NO
		X	X		NO
			X		NO
			X		NO
			X		NO
	CELL 31	X	X	X	NO
		X	X	X	NO
		X	X		NO
			X		NO
			X		NO
			X		NO
	CELL 32	X		X	YES
		X	X	X	NO
			X	X	NO
			X		NO
J	CELL 33	X	X	X	NO
		X	X	X	NO
		X	X	X	NO
			X	X	NO
		X			YES
		X			NO
		X			NO
	CELL 34	X	X	X	YES
		X	X	X	NO
		X	X	X	NO
			X	X	NO
			X		NO
			X		NO
			X		NO
		X			NO
	CELL 35	X	X	X	NO
		X	X		NO
		X			NO
	CELL 36	X	X	X	YES
		X	X	X	NO
		X	X	X	NO
		X			NO
			X		NO
	CELL 37	X	X	X	NO
		X	X	X	NO
		X	X	X	YES
		X	X		NO
K	CELL 38	X	X	X	NO
		X	X	X	NO
		X	X	X	NO
		X			NO
	CELL 39	X	X	X	YES
		X	X		NO
		X			NO
		X			NO
	CELL 40	X	X	X	NO
		X	X	X	NO
		X	X	X	NO
		X	X	X	YES
		X			NO
			X		NO
	CELL 41	X	X	X	NO
		X			NO
	CELL 42	X	X	X	NO
		X	X		NO
		X	X		NO
		X			YES
			X		NO
	CELL 43	X	X	X	NO
		X	X	X	NO
		X	X	X	NO
		X	X	X	YES
		X		X	NO
		X		X	NO
		X			NO
L	CELL 44	X	X	X	NO
		X	X	X	NO
		X	X		NO
		X			NO
	CELL 45	X		X	YES
		X	X	X	NO
		X	X	X	NO
			X	X	NO
		X		X	NO
	CELL 46	X	X	X	AT the edge
		X	X	X	NO
			X		NO
	CELL 47	X	X	X	YES
		X	X		NO
		X	X		NO
		X			NO
			X		NO
	CELL 48	X	X	X	YES
		X			NO
		X			NO
	CELL 49	X	X	X	NO
		X	X		NO
		X	X		NO
		X			NO
		X			NO
	CELL 50	X	X	X	YES
		X	X		NO
		X	X		NO
		X			NO
			X		NO
			X		NO

## Sheet: Slide C WT
IMAGE		PINK	RED	GREEN	NUCLEUS?
Slide C WT
C	CELL 1	X	X	X	YES
		X	X	X	YES
		X	X		NO
		X	X		NO
	CELL 2	X	X	X	NO
		X	X	X	NO
		X	X	X	NO
		X	X	X	NO
			X	X	NO
			X	X	NO
			X	X	NO
		X		X	YES
	CELL 3	X	X	X	NO
			X	X	NO
			X		NO
				X	NO
	CELL 4	X	X	X	YES
		X	X	X	NO
		X	X	X	NO
		X	X	X	NO
			X	X	NO
		X			NO
		X			NO
	CELL 5	X	X	X	NO
		X	X	X	NO
		X	X		NO
		X	X		NO
	CELL 6	X	X	X	YES
		X	X	X	NO
		X	X	X	NO
			X	X	NO
			X	X	NO
			X		NO
	CELL 7	X	X	X	NO
		X	X	X	NO
		X	X	X	NO
		X	X	X	NO
		X	X		NO
	CELL 8	X	X	X	YES
		X	X	X	NO
			X	X	NO
		X	X		NO
			X		NO
			X		NO
	CELL 9	X	X	X	YES
D	CELL 10	X	X	X	NO
		X	X	X	NO
				X	NO
	CELL 11	X	X	X	NO
		X	X	X	NO
		X	X		NO
		X	X		NO
		X		X	NO
		X		X	NO
	CELL 12	X	X	X	at the edge
		X	X	X	NO
		x	X		NO
		X	X		NO
		X			NO
	CELL 13	X	X	X	NO
		X	X		NO
			X	X	NO
			X		NO
		X			NO
				X	NO
	CELL 14	X	X		YES
		X	X	X	NO
			X		NO
		X			NO
		X			NO
		X			NO
			X		NO
			X		NO
E	CELL 15	X	X	X	NO
		X	X	X	NO
		X	X	X	NO
		X	X		NO
		X	X		NO
	CELL 16	X	X	X	YES
		X	X		NO
		X	X		NO
		X	X		NO
	CELL 17	X	X	X	NO
		X	X	X	NO
		X	X	X	NO
		X			YES
	CELL 18	X	X	X	NO
		X	X	X	NO
		X	X	X	NO
		X			NO
				X	NO
				X	NO
	CELL 19	X	X	X	YES
		X	X	X	at the edge
		X	X	X	NO
	CELL 20	X	X	X	NO
		X	X	X	YES
				X	YES
		X	X		NO
		X			NO
F	CELL 21	X	X	X	NO
		X	X	X	NO
		X	X	X	NO
		X	X		NO
		X			YES
		X			NO
	CELL 22	X	X	X	NO
		X	X	X	NO
		X		X	at the edge
	CELL 23	X	X	X	NO
		X		X	at the edge
			X		NO
	CELL 24	X	X	X	YES
		X	X	X	NO
		X	X		NO
			X		NO
			X		NO
			X		NO
		X			NO
	CELL 25	X	X	X	NO
		X	X	X	NO
		X	X		NO
			X	X	NO
			X		NO
G	CELL 26	X	X	X	NO
		X	X	X	NO
		X	X	X	NO
		X	X		NO
		X			YES
	CELL 27	X	X	X	NO
		X	X	X	NO
		X	X	X	NO
		X	X		NO
		X	X		NO
		X			YES
		X			NO
	CELL 28	X	X	X	NO
		X			NO
			X		NO
	CELL 29	X	X	X	YES
		X	X	X	YES
		X	X	X	NO
		X	X	X	NO
		X	X	X	NO
		X	X	X	NO
		X	X		NO
			X		NO
	CELL 30	X	X	X	NO
		X	X	X	NO
		X	X	X	NO
		X	X	X	NO
		X			NO
	CELL 31	X	X	X	NO
		X	X	X	NO
		X	X		NO
		X	X		NO
		X			NO
			X		NO
H	CELL 32	X	X		YES
		X	X	X	NO
			X		NO
			X		NO
	CELL 33	X	X	X	NO
			X	X	NO
			X		NO
		X			NO
	CELL 34	X	X	X	NO
		X	X	X	NO
		X	X		NO
			X	X	NO
			X		NO
	CELL 35	X	X	X	NO
		X	X	X	NO
		X			YES
		X			NO
	CELL 36	X	X	X	NO
		X	X	X	NO
		X	X		NO
	CELL 38	X	X	X	NO
		X			YES
	CELL 39	X	X	X	YES
		X		X	YES
		X	X	X	NO
			X	X	NO
		X			NO
		X			NO
			X		NO
	CELL 40	X	X	X	NO
		X	X	X	NO
		X	X		NO
			X		NO
			X		NO
			X	X	NO
			X	X	NO
I	CELL 41	X	X	X	NO
		X	X		YES
			X		NO
	CELL 42	X	X	X	YES
		X	X		NO
		X	X	X	NO
		X			NO
			X		NO
	CELL 43	X	X	X	NO
	CELL 44	X	X	X	NO
			X	X	NO
		X			NO
		X			NO
			X		NO
				X	NO
	CELL 45	X	X	X	YES
		X	X	X	YES
	CELL 46	X	X	X	NO
		X	X	X	NO
		X			NO
			X		NO
J	CELL 47	X	X	X	YES
		X	X	X	NO
			X		NO
			X		NO
	CELL 48	X	X	X	NO
		X	X	X	NO
		X			NO
		X			NO
		X			NO
	CELL 49	X	X	X	NO
		X	X	X	NO
		X	X	X	YES
				X	NO
	CELL 50	X	X	X	NO
		X	X	X	NO
		X	X		YES
		X			NO

## Sheet: Slide D 12H
IMAGE		PINK	RED	GREEN	NUCLEUS?
Slide D 12H
E	CELL 1	X		X	YES
		X	X	X	NO
		X	X		NO
		X	X		NO
		X			NO
	CELL 2	X	X	X	YES
		X	X		NO
		X			NO
			X		NO
	CELL 3	X		X	YES
		X	X	X	NO
		X	X		NO
			X		NO
F	CELL 4	X	X	X	YES
		X			NO
		X	X		NO
		X	X		NO
	CELL 5	X	X	X	NO
		X	X	X	NO
		X	X		NO
		X	X		NO
			X		NO
	CELL 6	X	X	X	NO
		X	X		NO
		X	X		NO
		X	X		NO
		X		X	NO
		X			NO
G	CELL 7	X	X	X	NO
		X	X		NO
		X			NO
		X			NO
			X		NO
	CELL 8	X	X	X	NO
		X	X	X	NO
		X			NO
		X			NO
	CELL 9	X	X	X	NO
		X	X	X	NO
			X	X	NO
			X		NO
			X		NO
		X			YES
		X			NO
H	CELL 10	X	X	X	YES
		X		X	YES
		X	X	X	NO
		X			NO
		X			NO
		X			NO
				X	NO
	CELL 11	X	X	X	NO
		X			NO
			X		NO
			X		NO
			X		NO
			X		NO
	CELL 12	X	X	X	NO
		X	X		NO
		X	X		NO
		X	X		NO
		X			YES
		X			NO
		X			NO
			X		NO
			X		NO
			X		NO
I	CELL 13	X		X	NO
		X	X		NO
		X			NO
		X			NO
		X			NO
			X		NO
	CELL 14	X	X	X	NO
		X			YES
		X			NO
				X	YES
J	CELL 15	X	X	X	NO
				X	YES
		X	X		NO
		X	X		NO
	CELL 16			X	YES
		X	X		NO
		X			NO
			X		NO
			X		NO
			X		NO
			X		NO
	CELL 17	X	X	X	YES
	CELL 18	X		X	YES
			X	X	NO
K	CELL 19	X	X	X	YES
		X	X	X	NO
		X	X	X	NO
		X	X		NO
			X		NO
			X		NO
		X			NO
	CELL 20	X		X	YES
			X		YES
			X		YES
		X		X	NO
			X	X	NO
	CELL 21	X	X	X	NO
		X	X		NO
		X			YES
				X	YES
	CELL 22	X	X	X	NO
		X	X	X	NO
		X	X		NO
		X			NO
		X			NO
		X			YES
L	CELL 23	X	X		YES
		X			YES
		X			NO
		X	X		NO
		X	X		NO
	CELL 24	X	X	X	NO
		X	X		NO
		X		X	NO
			X		NO
			X		NO
	CELL 25	X	X	X	NO
		X	X		NO
		X	X		NO
			X		NO
			X		NO
		X			NO
		X			YES
	CELL 26	X	X	X	NO
		X			YES
M	CELL 27	X	X	X	YES
		X			YES
		X	X		NO
	CELL 28	X	X	X	YES
		X	X		NO
		X			NO
			X		NO
			X		NO
	CELL 29	X	X	X	NO
		X	X		NO
		X	X		NO
		X	X		NO
		X			YES
			X		NO
			X		NO
N	CELL 30	X	X	X	NO
		X	X		YES
		X	X		YES
		X			NO
		X			NO
			X		NO
			X		NO
	CELL 31	X	X	X	YES
		X	X		NO
		X	X		NO
		X			NO
				X	NO
	CELL 32	X	X	X	YES
		X	X	X	NO
			X		NO
		X			NO
		X			YES
O	CELL 33	X			YES
			X		YES
				X	YES
		X			NO
	CELL 34	X	X	X	YES
		X		X	YES
			X	X	NO
		X			NO
	CELL 35	X	X	X	YES
	CELL 36	X	X	X	NO
		X	X		NO
A	CELL 37	X		X	YES
		X	X		NO
		X	X	X	NO
	CELL 38	X	X	X	NO
	CELL 39	X	X		NO
		X	X		NO
		X	X		NO
				X	YES
B	CELL 40	X	X	X	YES
		X	X		NO
		X			NO
			X		NO
	CELL 41	X	X	X	YES
	CELL 42	X	X	X	YES
		X	X		YES
C	CELL 43	X	X	X	NO
		X	X		NO
		X			NO
			X		NO
	CELL 44	X	X	X	NO
		X	X		YES
		X			NO
			X		NO
	CELL 45	X	X	X	YES
			X		NO
D	CELL 46	X	X	X	NO
			X	X	NO
			X	X	YES
			X		NO
			X		NO
		X			NO
	CELL 47	X	X	X	NO
		X	X		YES
		X	X		NO
		X			NO
		X			NO
	CELL 48	X	X	X	YES
		X	X	X	YES
		X	X		NO
		X			NO
	CELL 49	X	X	X	YES
		X	X		NO
			X		NO

## Sheet: Slide D 24H
IMAGE		PINK	RED	GREEN	NUCLEUS?
Slide D 24H
A	CELL 1	X	X	X	YES
			X	X	NO
			X		NO
	CELL 2	X		X	YES
		X	X		NO
		X	X		NO
B	CELL 3	X	X	X	YES
		X	X		NO
		X			NO
	CELL 4	X	X	X	YES
		X	X	X	YES
		X	X		YES
			X		NO
C	CELL 5	X	X		YES
		X	X		NO
			X		NO
D	CELL 6	X	X	X	YES
		X	X	X	NO
		X	X		NO
E	CELL 7	X	X	X	NO
		X	X		NO
		X			NO
			X		NO
	CELL 8	X	X	X	YES
		X	X		NO
F	CELL 9	X	X	X	YES
		X	X		NO
				X	NO
		X	X		NO
			X		NO
			X		NO
G	CELL 10	X	X	X	YES
			X	X	at the edge
		X			NO
		X			NO
	CELL 11	X	X	X	NO
H	CELL 12	X	X	X	YES
		X	X	X	NO
		X	X	X	NO
		X	X		NO
I	CELL 13	X	X	X	YES
		X	X		NO
		X	X		NO
		X	X		NO
			X		NO
J	CELL 14	X	X	X	YES
		X	X	X	YES
			X		NO
	CELL 15	X		X	NO
		X	X		NO
				X	YES
K	CELL 16	X	X	X	NO
		X	X		YES
	CELL 17	X	X	X	YES
	CELL 18	X	X	X	YES
		X	X		NO
			X		NO
L	CELL 19	X	X	X	YES
		X			NO
		X			NO
			X	X	NO
M	CELL 20	X	X	X	YES
		X	X		NO
		X			YES
		X			NO
			X	X	NO
	CELL 21	X	X	X	YES
		X			NO
			X		YES
			X		NO
	CELL 22	X	X	X	NO
			X		NO
	CELL 23	X	X	X	YES
		X	X	X	NO
			X	X	YES
		X			NO
			X		NO
			X		NO
N	CELL 24	X	X	X	YES
			X		NO
			X		NO
		X			NO
	CELL 25		X	X	YES
O	CELL 26		X	X	NO
				X	YES
	CELL 27	X	X	X	YES
		X			NO
		X			NO
	CEL 28	X	X	X	YES
P	CELL 29	X	X	X	NO
		X	X		NO
			X		NO
	CELL 30		X	X	NO
				X	YES
	CELL 31		X		NO
			X		NO
Q	CELL 32	X	X	X	YES
		X		X	YES
		X			NO
	CELL 33	X	X	X	YES
			X		YES
		X			NO
	CELL 34		X	X	YES
			X		NO
R	CELL 35	X	X	X	YES
		X	X		NO
			X		NO
	CELL 36	X	X	X	YES
		X	X		NO
		X			NO
				X	NO
	CELL 37	X	X	X	YES
S	CELL 38	X			YES
		X			NO
		X	X		NO
			X	X	NO
			X	X	YES
	CELL 39	X	X	X	YES
		X	X	X	NO
			X	X	NO
T	CELL 40	X	X	X	YES
		X	X	X	YES
		X	X		NO
			X		NO
			X		NO
	CELL 41		X	X	YES
			X		YES
			X		NO
U	CELL 42	X	X	X	YES
		X	X	X	YES
		X	X		NO
			X		NO
			X		NO
	CELL 43	X	X	X	YES
		X	X		at the edge
V	CELL 44	X	X	X	YES
	CELL 45	X	X	X	YES
	CELL 46	X	X	X	YES
		X	X		NO
		X	X		NO
	CELL 47	X	X	X	YES
		X	X		YES
W	CELL 48	X	X	X	YES
		X			YES
	CELL 49	X	X	X	YES
		X	X		NO
		X	X		NO
	CELL 50	X	X	X	YES
			X		NO
