# Supplementary material
Source: HighWire-hosted journal article supplement (doi:10.1101/rna.079258.122)
Supplement: Supplemental_Table_S4.xlsx [file Supplemental_Table_S4.xlsx]

## Sheet: Legend
Effects of RNAi on the transcriptome of procyclic forms
1. DeSeq2 analaysis for all coding regions and 3'-UTRs.
2. Reads per million reads were calculated for all procyclic datasets after removing rRNAs and other non-coding RNAs (sheet 3). The results for 3'-UTRs are shown together with the corresponding coding regions.
3. Reads per million reads were calculated for all procyclic datasets after removing rRNAs and other non-coding RNAs.
4. Raw aligned reads
5. DeSeq2 comparison of cytoplasmic versus total RNA. First, we used DeSeq2 to calculated the ratios of cytoplasmic RNA to whole cell RNA for the -tet and +tet conditions. This yielded ratios for which we could see mRNAs that were present at significantly higher levels in whole cell RNA than in cyctoplasmic RNA (poorly exported or short half-life in the cytoplasm) or significantly higher in cytop…
KEY
2x significantly (padj <0.05) increased
1.5x significantly (padj <0.05) increased
2x significantly (padj <0.05) decreased
1.5x significantly (padj <0.05) decreased
WC- whole cell
CY - cytoplasm				DATA LINKS and metadata
BS - bloodstream form			2	Bases	Bytes	Experiment	GEO_Accession	rna_fraction	Sample Name	treatment
PC- procyclic form			BioSample										no reads	file 1 % aligned	file 2 % aligned
CDS - coding sequence			1	SRR12712967	SAMN16264343	4.20 G	1.41 Gb	SRX9191802	GSM4803341	Whole cell	GSM4803341	-Doxycycline	27604270	0.9723	0.9562
UTR - 3'-UTR			2	SRR12712968	SAMN16264342	3.82 G	1.27 Gb	SRX9191803	GSM4803342	Cytoplasm	GSM4803342	-Doxycycline	25100551	0.9745	0.9571
			3	SRR12712969	SAMN16264341	4.18 G	1.40 Gb	SRX9191804	GSM4803343	Whole cell	GSM4803343	+Doxycycline	27518515	0.9724	0.9556
			4	SRR12712970	SAMN16264340	3.35 G	1.12 Gb	SRX9191805	GSM4803344	Cytoplasm	GSM4803344	+Doxycycline	22033197	0.9652	0.9488
			5	SRR12712971	SAMN16264339	4.02 G	1.35 Gb	SRX9191806	GSM4803345	Whole cell	GSM4803345	-Doxycycline	26456320	0.976	0.956
			6	SRR12712972	SAMN16264361	3.44 G	1.16 Gb	SRX9191807	GSM4803346	Cytoplasm	GSM4803346	-Doxycycline	22608987	0.9714	0.9527
			7	SRR12712973	SAMN16264360	4.25 G	1.42 Gb	SRX9191808	GSM4803347	Whole cell	GSM4803347	+Doxycycline	27971368	0.9747	0.9558
			8	SRR12712974	SAMN16264338	3.42 G	1.14 Gb	SRX9191809	GSM4803348	Cytoplasm	GSM4803348	+Doxycycline	22482570	0.9645	0.9463
			9	SRR12712975	SAMN16264359	3.90 G	1.31 Gb	SRX9191810	GSM4803349	Whole cell	GSM4803349	-Doxycycline	25659336	0.977	0.9592
			10	SRR12712976	SAMN16264358	2.95 G	1,011.59 Mb	SRX9191811	GSM4803350	Cytoplasm	GSM4803350	-Doxycycline	19435593	0.9634	0.9491
			11	SRR12712977	SAMN16264357	4.72 G	1.58 Gb	SRX9191812	GSM4803351	Whole cell	GSM4803351	+Doxycycline	31079911	0.9772	0.9614
			12	SRR12712978	SAMN16264356	3.65 G	1.22 Gb	SRX9191813	GSM4803352	Cytoplasm	GSM4803352	+Doxycycline	23994125	0.9702	0.9547

## Sheet: 1. DeSeq2 all
GeneID_full_list	GeneID	baseMean whole cell CDS	log2FoldChange WC+dox/WC-dox CDS	padj WC+dox/WC-dox CDS	log2FoldChange CY+dox/CY-dox	padj CY+dox/CY-dox	UTR baseMean WC	UTRlog2FoldChange WC+dox/WC-dox	UTR padj WC+dox/WC-dox	UTR log2FoldChange CY+dox/CY-dox	UTR padj CY+dox/CY-dox	BSF log2FoldChange WC+tet/WC-tet CDS	BSF Padj
Tb927.1.05	Tb927.1.05	0		NA	#VALUE!	NA	#N/A	#N/A	#N/A	#N/A	#N/A	0	0
Tb927.1.10	Tb927.1.10	0	0.7793	NA	0	NA	#N/A	#N/A	#N/A	#N/A	#N/A	0.6827	NA
Tb927.1.20	Tb927.1.20	5	-0.7169	1	0.9735	0.789699	#N/A	#N/A	#N/A	#N/A	#N/A	0.092	0.503
Tb927.1.30	Tb927.1.30	0		NA	#VALUE!	NA	#N/A	#N/A	#N/A	#N/A	#N/A	-1.3529	NA
Tb927.1.40	Tb927.1.40	1	-0.1617	1	1.6909	0.781649	#N/A	#N/A	#N/A	#N/A	#N/A	-1.4998	0.418
Tb927.1.60	Tb927.1.60	650	-0.8565	0.275161	-0.5401	0.545989	335	-0.5987	0.349422	-0.0654	0.949629	0.1129	0.173
Tb927.1.70	Tb927.1.70	84	-0.8683	0.242018	-1.0581	0.142229	#N/A	#N/A	#N/A	#N/A	#N/A	-0.5654	9.77e-06
Tb927.1.90	Tb927.1.90	145	-0.3162	0.840947	-0.3706	0.633298	3	0.2721	1	0.8412	0.859655	0.3258	7.98e-05
Tb927.1.100	Tb927.1.100	1644	-1.0494	0.0166694	-0.8468	0.0690121	523	-1.0231	0.342439	-0.8136	0.446186	0.0808	0.394
Tb927.1.110	Tb927.1.110	1348	-0.7979	3.0754e-05	-0.496	0.0263805	#N/A	#N/A	#N/A	#N/A	#N/A	-0.387	0.000169
Tb927.1.120	Tb927.1.120	5942	-0.8829	0.00197581	-0.8062	0.00497792	904	-0.818	0.000178435	-0.5606	0.0238411	-0.2513	0.000466
Tb927.1.180	Tb927.1.180	1819	-0.2788	1	-0.1841	0.846665	357	-0.1608	1	-0.049	0.969307	-0.2001	0.0057
Tb927.1.190	Tb927.1.190	1422	-0.5668	0.393574	-1.0615	0.00623743	672	-0.5973	0.0492805	-0.7412	0.00497792	0.0741	0.545
Tb927.1.220	Tb927.1.220	1973	-0.2761	1	-0.1634	0.870646	610	-0.2063	1	0.2854	0.749793	-0.1963	0.00673
Tb927.1.240	Tb927.1.240	1161	-0.7156	0.0709079	-1.101	0.000545091	634	-0.9707	0.000776688	-0.7992	0.00938252	-0.0167	0.867
Tb927.1.270	Tb927.1.270	56	-0.4468	0.872491	-0.3054	0.77767	397	-0.195	1	-0.0223	0.984872	-0.2308	0.113
Tb927.1.275	Tb927.1.275	43	0.7476	0.274065	0.682	0.437915	#N/A	#N/A	#N/A	#N/A	#N/A	-0.1961	0.0366
Tb927.1.280	Tb927.1.280	18	0.0117	1	0.0128	0.999103	#N/A	#N/A	#N/A	#N/A	#N/A	-0.1092	0.758
Tb927.1.290	Tb927.1.290	169	-0.125	1	0.0759	0.96425	51	-0.7985	0.550078	-0.0325	0.990565	-0.5611	4.4e-13
Tb927.1.300	Tb927.1.300	260	-0.5262	0.0765098	-0.5047	0.0967008	78	-0.4087	0.912391	-0.5154	0.569863	-0.2787	0.00221
Tb927.1.320	Tb927.1.320	179	-0.4214	0.570686	-0.5693	0.291674	1	-0.7876	1	-1.123	0.885068	0.1822	0.136
Tb927.1.330	Tb927.1.330	32	-0.7102	0.582197	-0.5498	0.697397	0	0	NA	0.8006	NA	0.1977	0.285
Tb927.1.350	Tb927.1.350	285	-0.5604	0.169726	-0.4361	0.336734	6	-0.6359	1	-1.1649	0.694682	-0.2906	0.00523
Tb927.1.370.1	Tb927.1.370	386	-0.0875	1	-0.115	0.922735	153	-0.5478	0.745122	-0.3718	0.714518	-0.4554	7.53e-08
Tb927.1.370.2	Tb927.1.370	386	-0.0864	1	-0.1151	0.922735	153	-0.5478	0.745122	-0.3718	0.714518	-0.4554	7.53e-08
Tb927.1.380	Tb927.1.380	167	-0.1118	1	-0.0305	0.976369	61	0.0105	1	-0.003	1	-0.0919	0.523
Tb927.1.400	Tb927.1.400	80	-0.1888	1	-0.6105	0.436796	1177	-0.6588	0.321576	-0.4335	0.543235	0.2908	0.0488
Tb927.1.410	Tb927.1.410	422	-0.5093	0.702493	-0.8459	0.177629	#N/A	#N/A	#N/A	#N/A	#N/A	0.1806	0.0222
Tb927.1.420	Tb927.1.420	1513	-0.6298	0.216485	-1.0178	0.00496516	#N/A	#N/A	#N/A	#N/A	#N/A	0.0911	0.211
Tb927.1.430	Tb927.1.430	417	-0.5451	0.17739	-0.6588	0.0577683	4	-0.8141	1	-3.211	0.245922	-0.1319	0.125
Tb927.1.450	Tb927.1.450	420	-0.3977	0.701836	-0.795	0.0524416	#N/A	#N/A	#N/A	#N/A	#N/A	-0.1254	0.104
Tb927.1.470	Tb927.1.470	21	0.0207	1	0.1764	0.900728	0	2.2619	1	0.8005	0.957644	-0.4088	0.221
Tb927.1.480	Tb927.1.480	137	-0.2123	1	-0.5612	0.482341	69	-0.6272	0.75888	-0.62	0.565778	-0.3518	0.000513
Tb927.1.490	Tb927.1.490	16	-0.5978	0.998419	-1.1274	0.515057	69	-0.4584	1	-0.0665	0.973916	-0.8447	0.00177
Tb927.1.500	Tb927.1.500	108	-0.7141	0.31945	-0.7561	0.233969	4	-0.5254	1	0.2402	0.947212	-0.4177	2.07e-06
Tb927.1.520	Tb927.1.520	15	-0.4475	1	-0.7167	0.681113	#N/A	#N/A	#N/A	#N/A	#N/A	-1.2021	6.48e-05
Tb927.1.530.1	Tb927.1.530	337	0.02	1	-0.1969	0.775055	703	-0.016	1	0.0296	0.929405	0.2455	0.0992
Tb927.1.530.2	Tb927.1.530	571	0.0527	1	-0.242	0.726501	703	-0.016	1	0.0296	0.929405	0.2455	0.0992
Tb927.1.540	Tb927.1.540	1285	-0.1895	0.895298	-0.1603	0.699228	169	-0.0689	1	-0.1055	0.886183	-0.1937	0.00474
Tb927.1.560	Tb927.1.560	2512	-0.099	1	-0.0745	0.886073	287	-0.1551	1	-0.0488	0.951541	0.0788	0.411
Tb927.1.570	Tb927.1.570	1480	-0.1	1	-0.166	0.565586	1148	-0.1396	1	-0.1225	0.807007	-0.0359	0.768
Tb927.1.580	Tb927.1.580	2365	0.2491	0.867427	0.2207	0.659732	3100	0.2893	0.618473	0.4911	0.0636314	0.4549	7.55e-09
Tb927.1.600	Tb927.1.600	1852	0.244	0.972946	0.456	0.31431	2035	0.1678	0.984102	0.6039	0.0069096	0.1741	0.0224
Tb927.1.610	Tb927.1.610	601	0.1433	1	0.5318	0.590657	#N/A	#N/A	#N/A	#N/A	#N/A	0.0618	0.631
Tb927.1.630	Tb927.1.630	757	0.1455	1	0.2011	0.586131	538	0.1875	1	0.184	0.743986	0.2599	0.0233
Tb927.1.640	Tb927.1.640	1639	0.0312	1	-0.1664	0.72507	328	-0.2024	1	0.0617	0.940046	0.0634	0.417
Tb927.1.650	Tb927.1.650	717	0.0868	1	-0.0816	0.918765	#N/A	#N/A	#N/A	#N/A	#N/A	0.0961	0.48
Tb927.1.670	Tb927.1.670	801	0.1117	1	-0.0345	0.971173	#N/A	#N/A	#N/A	#N/A	#N/A	0.1213	0.171
Tb927.1.690	Tb927.1.690	669	0.0816	1	-0.0254	0.961284	415	0.1749	0.951846	0.245	0.493017	0.2176	0.0298
Tb927.1.700	Tb927.1.700	1657	-0.0785	1	-0.0602	0.920864	178	0.1346	1	0.2121	0.84282	-0.8393	4.72e-44
Tb927.1.710	Tb927.1.710	3540	-0.1624	1	-0.0785	0.895555	842	-0.2659	1	0.0971	0.923176	-0.5678	9.67e-17
Tb927.1.720	Tb927.1.720	2723	-0.0992	1	0.0388	0.940767	373	-0.1158	1	0.0738	0.931743	-0.1442	0.0757
Tb927.1.730	Tb927.1.730	3338	-0.5221	0.0833479	-0.6998	0.00415093	953	-0.4916	0.412552	-0.6296	0.110078	-0.1018	0.277
Tb927.1.740	Tb927.1.740	1539	0.2246	0.550532	0.3836	0.0430842	#N/A	#N/A	#N/A	#N/A	#N/A	0.1976	0.0493
Tb927.1.750	Tb927.1.750	1535	-0.1367	1	-0.445	0.5149	610	-0.1164	1	-0.2742	0.759868	-0.0036	0.968
Tb927.1.760	Tb927.1.760	849	-0.0191	1	-0.1956	0.748568	530	-0.0627	1	0.0225	0.980561	0.129	0.141
Tb927.1.780	Tb927.1.780	480	-0.1064	1	-0.0584	0.89022	290	-0.261	1	-0.1799	0.845435	-0.0045	0.977
Tb927.1.790	Tb927.1.790	895	-0.1709	1	-0.2801	0.667554	#N/A	#N/A	#N/A	#N/A	#N/A	-0.0019	0.989
Tb927.1.800	Tb927.1.800	78	-0.5456	0.226406	-1.1761	0.000277271	17	-0.3556	1	-0.074	0.966938	-1.1619	8.43e-13
Tb927.1.820	Tb927.1.820	576	0.1	1	-0.0375	0.952138	362	-0.0066	1	0.2083	0.523514	-0.0364	0.776
Tb927.1.830.1	Tb927.1.830	768	-0.3481	0.51941	-0.4283	0.21384	217	-0.3612	0.529092	-0.3745	0.327813	-0.1271	0.367
Tb927.1.830.2	Tb927.1.830	391	-0.4202	0.183774	-0.3776	0.215723	217	-0.3612	0.529092	-0.3745	0.327813	-0.1271	0.367
Tb927.1.840	Tb927.1.840	1003	-0.0865	1	-0.1743	0.576673	136	-0.0946	1	-0.1514	0.776179	0.1969	0.0729
Tb927.1.860	Tb927.1.860	2058	0.1519	1	0.0355	0.969672	1878	0.1274	0.951846	0.1109	0.71751	0.1983	0.0147
Tb927.1.870	Tb927.1.870	1598	0.032	1	0.0525	0.900006	474	-0.1356	1	0.072	0.881119	-0.0209	0.859
Tb927.1.880	Tb927.1.880	1414	-0.1466	1	-0.2127	0.83441	#N/A	#N/A	#N/A	#N/A	#N/A	-0.347	9.25e-07
Tb927.1.890	Tb927.1.890	581	0.0942	1	0.1003	0.880715	141	0.223	1	0.2521	0.727405	0.524	1.56e-06
Tb927.1.990	Tb927.1.990	967	0.0668	1	0.2047	0.720737	#N/A	#N/A	#N/A	#N/A	#N/A	-0.0247	0.814
Tb927.1.1000	Tb927.1.1000	2039	-0.2171	0.681135	-0.2716	0.313733	#N/A	#N/A	#N/A	#N/A	#N/A	0.1158	0.278
Tb927.1.1010	Tb927.1.1010	909	0.022	1	-0.0732	0.867536	#N/A	#N/A	#N/A	#N/A	#N/A	0.1578	0.105
Tb927.1.1020	Tb927.1.1020	375	0.0411	1	0.0179	0.98714	276	0.0474	1	-0.0072	0.997572	0.1181	0.317
Tb927.1.1025	Tb927.1.1025	673	0.0506	1	-0.0532	0.93727	#N/A	#N/A	#N/A	#N/A	#N/A	0.4567	0.00335
Tb927.1.1030	Tb927.1.1030	902	0.0373	1	-0.1496	0.733052	304	0.0389	1	-0.0054	0.997602	0.294	0.00306
Tb927.1.1050	Tb927.1.1050	1059	-0.2704	0.855217	-0.4603	0.226506	#N/A	#N/A	#N/A	#N/A	#N/A	-0.0863	0.316
Tb927.1.1060	Tb927.1.1060	386	0.1167	1	-0.1765	0.810608	573	0.1915	0.966321	-0.0141	0.987204	0.3159	0.0202
Tb927.1.1080	Tb927.1.1080	1176	-0.0281	1	-0.0778	0.905212	90	-0.2798	1	-0.0265	0.987204	0.2783	0.00465
Tb927.1.1090	Tb927.1.1090	391	0.0682	1	0.2486	0.603892	#N/A	#N/A	#N/A	#N/A	#N/A	0.4203	0.0017
Tb927.1.1100	Tb927.1.1100	894	0.0918	1	-0.1303	0.858621	#N/A	#N/A	#N/A	#N/A	#N/A	-0.0269	0.811
Tb927.1.1120	Tb927.1.1120	875	-0.1589	1	-0.272	0.467086	#N/A	#N/A	#N/A	#N/A	#N/A	0.1055	0.438
Tb927.1.1130	Tb927.1.1130	749	0.0004	1	-0.1898	0.766455	#N/A	#N/A	#N/A	#N/A	#N/A	0.1858	0.094
Tb927.1.1140	Tb927.1.1140	657	-0.0134	1	-0.1549	0.750997	#N/A	#N/A	#N/A	#N/A	#N/A	0.2119	0.0602
Tb927.1.1150	Tb927.1.1150	1009	0.0316	1	-0.1287	0.836785	153	0.2384	1	-0.0145	0.993398	0.2386	0.0457
Tb927.1.1160	Tb927.1.1160	1351	-0.1152	1	-0.2759	0.472501	#N/A	#N/A	#N/A	#N/A	#N/A	0.1491	0.134
Tb927.1.1170	Tb927.1.1170	493	0.1429	1	0.1134	0.903415	#N/A	#N/A	#N/A	#N/A	#N/A	0.092	0.568
Tb927.1.1175	Tb927.1.1175	650	0.0644	1	0.0174	0.980145	1620	-0.0286	1	0.0404	0.937194	0.3223	0.0319
Tb927.1.1200	Tb927.1.1200	752	-0.0859	1	0.0472	0.928615	83	-0.1507	1	0.1019	0.892839	0.1074	0.371
Tb927.1.1210	Tb927.1.1210	498	-0.1384	1	-0.1371	0.738824	354	0.013	1	-0.0868	0.865973	0.0965	0.665
Tb927.1.1220	Tb927.1.1220	1138	0.1448	1	0.2291	0.756995	#N/A	#N/A	#N/A	#N/A	#N/A	0.0412	0.742
Tb927.1.1230	Tb927.1.1230	639	-0.0528	1	-0.2738	0.722184	246	0.2763	0.894424	0.0939	0.895305	-0.1062	0.343
Tb927.1.1240	Tb927.1.1240	462	0.2312	1	0.3285	0.586125	282	0.314	0.979636	0.4643	0.499624	-0.332	2.38e-05
Tb927.1.1270	Tb927.1.1270	293	1.3585	0.000178435	2.5838	6.94121e-14	#N/A	#N/A	#N/A	#N/A	#N/A	0.1682	0.139
Tb927.1.1300	Tb927.1.1300	210	0.1624	1	-0.1235	0.837835	#N/A	#N/A	#N/A	#N/A	#N/A	0.0097	0.96
Tb927.1.1310	Tb927.1.1310	920	-0.0601	1	-0.3568	0.345502	251	-0.2845	0.91654	-0.2764	0.634978	0.1648	0.173
Tb927.1.1330	Tb927.1.1330	995	0.0066	1	-0.0945	0.828429	#N/A	#N/A	#N/A	#N/A	#N/A	0.1507	0.192
Tb927.1.1340	Tb927.1.1340	1294	-0.0096	1	-0.202	0.652603	#N/A	#N/A	#N/A	#N/A	#N/A	-0.0067	0.954
Tb927.1.1350	Tb927.1.1350	351	0.3706	0.998401	0.2673	0.81366	216	0.1835	1	0.2324	0.74793	0.3465	3.01e-07
Tb927.1.1370	Tb927.1.1370	636	-0.4097	0.643849	-0.4942	0.318009	272	0.0665	1	-0.3814	0.391151	-0.5711	2.05e-08
Tb927.1.1380	Tb927.1.1380	193	1.6832	1.45293e-05	3.0924	5.61975e-15	142	1.4371	2.1748e-05	2.6185	4.21674e-15	-0.0933	0.38
Tb927.1.1390	Tb927.1.1390	319	-0.1205	1	-0.0094	0.997572	119	-0.1746	1	0.3451	0.561966	0.0253	0.895
Tb927.1.1400	Tb927.1.1400	243	0.2366	0.990479	0.3755	0.479427	48	0.3079	0.999072	0.5956	0.372711	0.0265	0.91
Tb927.1.1420	Tb927.1.1420	860	0.4866	0.564209	0.5627	0.304116	#N/A	#N/A	#N/A	#N/A	#N/A	0.3579	1.75e-06
Tb927.1.1470	Tb927.1.1470	102	1.822	0.000898258	1.6828	0.00510943	159	1.2136	0.189125	0.4797	0.705613	0.4995	3.08e-06
Tb927.1.1500	Tb927.1.1500	94	3.0938	4.8431e-12	2.1183	1.73057e-05	400	4.4656	4.64613e-17	3.554	5.87787e-11	-0.4546	1.68e-10
Tb927.1.1530	Tb927.1.1530	171	0.7192	0.369703	1.5422	0.00714914	405	0.1458	1	0.1689	0.868425	-0.248	0.000509
Tb927.1.1540	Tb927.1.1540	1045	-0.1848	1	-0.5593	0.222078	395	-0.2937	1	-0.3704	0.616855	-0.4786	1.16e-08
Tb927.1.1550	Tb927.1.1550	1422	-0.0481	1	-0.2157	0.341819	331	0.0405	1	-0.11	0.874354	-0.0703	0.46
Tb927.1.1560	Tb927.1.1560	522	0.2245	0.805549	0.2834	0.429985	382	-0.1689	0.99311	0.1187	0.807954	-0.5039	1.01e-09
Tb927.1.1580	Tb927.1.1580	448	-0.2361	1	-0.2978	0.63708	372	-0.2378	0.718082	-0.242	0.503131	0.215	0.0597
Tb927.1.1600	Tb927.1.1600	653	-0.0799	1	-0.037	0.974404	#N/A	#N/A	#N/A	#N/A	#N/A	-0.4188	9.52e-09
Tb927.1.1610	Tb927.1.1610	468	0.02	1	-0.1046	0.851099	302	0.055	1	-0.0337	0.943604	-0.2263	0.109
Tb927.1.1620	Tb927.1.1620	1043	-0.1611	1	-0.1458	0.825732	346	-0.2954	0.710206	0.0954	0.872104	-0.5105	8.54e-11
Tb927.1.1630	Tb927.1.1630	230	-0.1683	1	-0.505	0.0785887	#N/A	#N/A	#N/A	#N/A	#N/A	-0.2238	0.181
Tb927.1.1640	Tb927.1.1640	552	0.0712	1	-0.0968	0.841318	#N/A	#N/A	#N/A	#N/A	#N/A	-0.0942	0.515
Tb927.1.1650	Tb927.1.1650	338	0.0378	1	0.0695	0.932397	102	-0.1129	1	0.3996	0.524343	0.224	0.281
Tb927.1.1660	Tb927.1.1660	424	0.0289	1	-0.0043	0.998809	#N/A	#N/A	#N/A	#N/A	#N/A	-0.198	0.232
Tb927.1.1670	Tb927.1.1670	885	-0.4282	0.9035	-0.7201	0.301103	1269	-0.4747	0.162404	-0.569	0.0398325	-0.646	2.92e-22
Tb927.1.1680	Tb927.1.1680	947	-0.1714	0.950502	-0.1564	0.700493	588	-0.1974	0.893714	-0.1772	0.659798	-0.1936	0.0843
Tb927.1.1690	Tb927.1.1690	1457	-0.2852	0.886847	-0.4774	0.276357	691	-0.2041	0.833401	-0.2328	0.489228	-0.2293	0.00285
Tb927.1.1700	Tb927.1.1700	701	-0.2977	0.917124	-0.2239	0.74793	#N/A	#N/A	#N/A	#N/A	#N/A	-0.5774	9.34e-09
Tb927.1.1710	Tb927.1.1710	1596	-0.0758	1	-0.3835	0.615787	588	-0.1003	1	-0.1831	0.734662	-0.2919	3.31e-05
Tb927.1.1720	Tb927.1.1720	1190	0.0466	1	-0.0449	0.899717	#N/A	#N/A	#N/A	#N/A	#N/A	-0.1048	0.355
Tb927.1.1730	Tb927.1.1730	2778	-0.0026	1	-0.0455	0.930407	433	-0.0892	1	-0.162	0.724696	-0.2512	0.000975
Tb927.1.1740	Tb927.1.1740	314	0.4263	0.930014	0.4247	0.660251	#N/A	#N/A	#N/A	#N/A	#N/A	-0.433	2.36e-09
Tb927.1.1750	Tb927.1.1750	220	0.2439	1	0.2143	0.868425	10	0.3733	1	-0.1279	0.962938	-0.0167	0.889
Tb927.1.1760	Tb927.1.1760	92	0.2776	1	0.6659	0.255177	#N/A	#N/A	#N/A	#N/A	#N/A	-0.3958	0.0172
Tb927.1.1770	Tb927.1.1770	254	-0.3443	0.338961	-0.3392	0.348209	409	-0.4065	0.709453	-0.3517	0.57418	-0.1759	0.223
Tb927.1.1790	Tb927.1.1790	388	0.3223	0.783745	0.4763	0.293317	309	0.246	1	0.4068	0.589584	-0.0054	0.972
Tb927.1.1820	Tb927.1.1820	466	0.1496	1	0.1381	0.880691	68	0.0654	1	0.7105	0.150774	-0.291	0.000175
Tb927.1.1840	Tb927.1.1840	412	0.2439	1	0.3558	0.627612	452	0.1603	1	0.3688	0.66762	-0.2796	0.00339
Tb927.1.1850	Tb927.1.1850	146	-0.1121	1	0.189	0.873903	33	0.1057	1	1.5302	0.190487	-0.5518	1.39e-08
Tb927.1.1860	Tb927.1.1860	15	-0.1535	1	-0.0597	0.992675	#N/A	#N/A	#N/A	#N/A	#N/A	-0.9047	4.49e-05
Tb927.1.1880	Tb927.1.1880	1406	0.047	1	-0.0599	0.93727	#N/A	#N/A	#N/A	#N/A	#N/A	-0.6419	7.73e-26
Tb927.1.1890	Tb927.1.1890	742	-0.0628	1	-0.1345	0.884946	325	0.1636	1	0.2202	0.742345	-0.6531	9.54e-20
Tb927.1.1910	Tb927.1.1910	1195	-0.1857	1	-0.4178	0.354691	363	-0.1148	1	-0.2514	0.728796	-0.735	1.72e-22
Tb927.1.1920	Tb927.1.1920	334	0.4119	0.93723	0.1152	0.928554	591	0.4939	0.0130105	0.4802	0.0180733	-0.4506	3.79e-05
Tb927.1.1930	Tb927.1.1930	404	0.5463	0.699843	0.9937	0.0940217	1475	0.3565	1	0.7559	0.404812	-0.7288	8.71e-28
Tb927.1.1960	Tb927.1.1960	2549	0.056	1	0.1551	0.760221	300	0.0368	1	0.1396	0.834548	-0.5786	6.76e-09
Tb927.1.1980	Tb927.1.1980	1008	0.051	1	-0.0182	0.969384	173	-0.0373	1	0.0296	0.967163	-0.518	1.28e-07
Tb927.1.1990	Tb927.1.1990	760	0.2151	0.844492	0.2824	0.408473	#N/A	#N/A	#N/A	#N/A	#N/A	-0.5418	4.07e-06
Tb927.1.2000	Tb927.1.2000	249	-0.0486	1	-0.0231	0.985008	#N/A	#N/A	#N/A	#N/A	#N/A	-0.6371	0.00159
Tb927.1.2040	Tb927.1.2040	5	-0.0083	1	-2.4829	0.445839	#N/A	#N/A	#N/A	#N/A	#N/A	-0.1711	0.202
Tb927.1.2060	Tb927.1.2060	0	0	NA	0.8006	NA	#N/A	#N/A	#N/A	#N/A	#N/A	-0.5052	0.0502
Tb927.1.2070	Tb927.1.2070	0	#VALUE!	NA	#VALUE!	NA	#N/A	#N/A	#N/A	#N/A	#N/A	-0.9151	0.011
Tb927.1.2100	Tb927.1.2100	3976	-1.0725	0.000211899	-1.0428	0.000270299	1607	-1.0638	0.000254372	-1.0613	0.00018281	-2.0142	5.96e-107
Tb927.1.2110	Tb927.1.2110	663	0.6392	0.00104793	0.7615	0.000126396	144	0.6507	0.801482	1.5464	0.0287282	0.6347	4.73e-12
Tb927.1.2120	Tb927.1.2120	484	0.2901	0.857384	0.0756	0.922992	1014	0.2522	1	0.5083	0.382864	-0.4925	2.45e-13
Tb927.1.2150	Tb927.1.2150	41	-0.1623	1	-0.3306	0.816457	143	-0.1632	1	0.1896	0.878254	-0.6162	0.000311
Tb927.1.2160	Tb927.1.2160	242	-0.4316	1	-0.2871	0.834554	283	-0.3569	1	-0.5077	0.599904	0.4981	0.000211
Tb927.1.2190	Tb927.1.2190	1000	0.3056	1	1.027	0.0329807	296	-0.0064	1	0.7188	0.113254	-0.7731	1.69e-29
Tb927.1.2200	Tb927.1.2200	132	-0.3371	0.92479	-1.0105	0.012968	82	-0.7144	0.719046	-0.5382	0.631546	-2.297	3.36e-57
Tb927.1.2210	Tb927.1.2210	1803	-0.8997	1.90497e-06	-0.6882	0.000632223	1626	-0.8103	0.248342	-0.6457	0.36544	-1.1057	1e-36
Tb927.1.2230	Tb927.1.2230	2484	-0.5838	0.874702	-0.3364	0.801274	2035	-0.6033	0.821077	-0.2878	0.825932	-0.1828	0.094
Tb927.1.2260	Tb927.1.2260	1781	-0.3262	1	0.1057	0.940219	1984	-0.4268	0.960896	-0.0422	0.980369	0.2397	0.00467
Tb927.1.2310	Tb927.1.2310	244	-1.0515	0.174116	-0.619	0.532149	267	-0.9161	0.324944	-0.4294	0.705613	-1.5753	3.89e-34
Tb927.1.2320	Tb927.1.2320	610	-0.7924	0.0456856	-0.7222	0.0673386	#N/A	#N/A	#N/A	#N/A	#N/A	-0.9663	2.38e-16
Tb927.1.2330	Tb927.1.2330	36991	-0.4427	0.17049	-0.5742	0.0218615	11501	-0.499	0.216485	-0.5235	0.126511	-0.67	1.26e-31
Tb927.1.2340	Tb927.1.2340	48657	-0.475	0.266643	-0.5162	0.137077	3510	-0.4854	0.357547	-0.4981	0.238371	-0.7376	3.38e-43
Tb927.1.2350	Tb927.1.2350	32893	-0.4465	0.183096	-0.5889	0.0218848	11649	-0.4514	0.339184	-0.5631	0.0956976	-0.6818	6.37e-33
Tb927.1.2360	Tb927.1.2360	48369	-0.5105	0.216576	-0.4206	0.311056	3632	-0.5981	0.155071	-0.4344	0.350917	-0.7241	5.18e-40
Tb927.1.2370	Tb927.1.2370	39524	-0.4642	0.114866	-0.5351	0.0313796	11604	-0.4995	0.234207	-0.5533	0.106377	-0.6705	2.83e-31
Tb927.1.2380	Tb927.1.2380	48462	-0.4773	0.251521	-0.4828	0.176732	3743	-0.5239	0.38606	-0.465	0.377971	-0.7321	8.07e-42
Tb927.1.2390	Tb927.1.2390	36719	-0.4522	0.157356	-0.5612	0.0281649	22536	-0.475	0.422069	-0.5153	0.238552	-0.6757	5.1e-33
Tb927.1.2400	Tb927.1.2400	42401	-0.4784	0.285271	-0.4761	0.213873	3620	-0.4981	0.27922	-0.5946	0.0905116	-0.7354	2.51e-42
Tb927.1.2410	Tb927.1.2410	14825	-0.4318	0.245219	-0.6218	0.0188325	36	-0.5175	0.621906	-0.3158	0.705613	-0.6457	1.9e-23
Tb927.1.2420	Tb927.1.2420	71	-1.0611	0.00773515	-1.3347	0.00151577	1584	-0.6126	0.426448	-0.7939	0.114068	-1.5035	8.28e-20
Tb927.1.2430	Tb927.1.2430	7589	-0.5998	0.00684842	-0.539	0.0155323	26052	-0.6289	0.17695	-0.602	0.155617	-0.6651	5.95e-19
Tb927.1.2450	Tb927.1.2450	7646	-0.5789	0.0131905	-0.5595	0.0134607	27599	-0.586	0.248649	-0.6125	0.151533	-0.6873	3.25e-21
Tb927.1.2470	Tb927.1.2470	7547	-0.5826	0.00412792	-0.5343	0.00836296	26091	-0.5828	0.276959	-0.6815	0.100613	-0.6874	8.89e-19
Tb927.1.2490	Tb927.1.2490	6797	-0.6141	0.00433006	-0.4863	0.0329807	22945	-0.6289	0.226506	-0.6612	0.131143	-0.6443	4.14e-19
Tb927.1.2510	Tb927.1.2510	7607	-0.5932	0.00611591	-0.546	0.0112525	27602	-0.584	0.240475	-0.621	0.13446	-0.7051	4.85e-21
Tb927.1.2530	Tb927.1.2530	7536	-0.532	0.0304665	-0.5691	0.0116119	22066	-0.5976	0.299037	-0.662	0.144116	-0.6568	2.24e-17
Tb927.1.2550	Tb927.1.2550	7730	-0.6142	0.000429698	-0.5322	0.00278892	25509	-0.5958	0.243246	-0.7052	0.0784144	-0.6725	9.18e-21
Tb927.1.2570	Tb927.1.2570	1392	-0.6698	0.280974	-0.9346	0.0359879	#N/A	#N/A	#N/A	#N/A	#N/A	-0.8996	7.7e-53
Tb927.1.2580	Tb927.1.2580	1826	-0.8576	3.14455e-05	-0.9144	5.04765e-06	#N/A	#N/A	#N/A	#N/A	#N/A	-0.957	1.28e-24
Tb927.1.2600	Tb927.1.2600	177	0.894	0.0339165	2.0649	1.4017e-07	220	0.0705	1	1.0535	0.0334449	-1.3879	2.96e-92
Tb927.1.2640	Tb927.1.2640	489	-0.7846	0.444251	-0.5825	0.535949	#N/A	#N/A	#N/A	#N/A	#N/A	-0.7508	5.97e-09
Tb927.1.2670	Tb927.1.2670	1210	-0.5813	0.15518	-0.2329	0.694186	511	-0.5671	0.250611	-0.3501	0.552029	-0.9236	1.83e-48
Tb927.1.2700	Tb927.1.2700	1190	-0.8015	3.57638e-06	-0.8014	3.66237e-06	#N/A	#N/A	#N/A	#N/A	#N/A	-0.6897	1.15e-13
Tb927.1.2710	Tb927.1.2710	218	-0.3622	0.241078	-0.6287	0.0428334	293	-0.6075	0.0595805	-0.5941	0.0706941	-0.6714	7.56e-19
Tb927.1.2730	Tb927.1.2730	669	-0.4105	0.304015	-0.2875	0.507446	#N/A	#N/A	#N/A	#N/A	#N/A	-0.6116	3.75e-12
Tb927.1.2740	Tb927.1.2740	1291	-0.8602	5.50672e-09	-0.9055	4.69002e-10	135	-0.9856	0.000658702	-0.6461	0.0337333	-0.6877	4.11e-17
Tb927.1.2750	Tb927.1.2750	1496	-0.8738	0.00311712	-0.523	0.151561	#N/A	#N/A	#N/A	#N/A	#N/A	-0.7631	1.23e-10
Tb927.1.2760	Tb927.1.2760	421	-1.322	7.1965e-08	-1.2381	7.57401e-07	908	-1.3127	4.4656e-09	-1.217	5.64486e-08	-1.607	1.46e-41
Tb927.1.2770	Tb927.1.2770	941	-0.8907	0.00182148	-0.9367	0.000525665	281	-0.8621	0.027991	-0.9459	0.00568598	-0.7807	6.89e-15
Tb927.1.2780	Tb927.1.2780	36	-0.8299	0.402383	-0.4465	0.667024	81	-0.7656	0.0870031	-0.6978	0.116417	-0.548	0.0227
Tb927.1.2820	Tb927.1.2820	209	-0.176	1	-0.5235	0.456212	84	-0.2369	1	-0.2856	0.648771	0.9523	1.41e-31
Tb927.1.2850	Tb927.1.2850	146	-0.1757	1	-0.4859	0.557381	64	0.024	1	-0.0233	0.986556	0.9608	1.34e-25
Tb927.1.2880	Tb927.1.2880	166	-0.1883	1	-0.2668	0.804103	82	-0.0873	1	-0.1169	0.891665	0.9465	1.21e-26
Tb927.1.2970	Tb927.1.2970	497	-0.1216	1	-0.4437	0.283091	118	-0.1069	1	-0.3475	0.44601	0.0341	0.798
Tb927.1.2980	Tb927.1.2980	1062	-0.0218	1	-0.2575	0.682706	450	-0.1014	1	-0.1675	0.761555	0.1206	0.146
Tb927.1.2985	Tb927.1.2985	983	0.0212	1	0.0544	0.922526	1285	0.0346	1	-0.0379	0.951541	0.1312	0.319
Tb927.1.2990	Tb927.1.2990	1808	-0.1243	1	-0.264	0.534866	206	-0.1156	1	-0.038	0.95919	0.1759	0.0223
Tb927.1.3000	Tb927.1.3000	1429	-0.0261	1	-0.2322	0.565608	865	-0.0246	1	-0.1918	0.780046	0.1139	0.212
Tb927.1.3010	Tb927.1.3010	1338	-0.0013	1	-0.0682	0.864011	404	-0.0491	1	0.0106	0.99352	0.3988	2.54e-05
Tb927.1.3030	Tb927.1.3030	3860	0.0544	1	-0.0554	0.928011	#N/A	#N/A	#N/A	#N/A	#N/A	0.3273	2.15e-05
Tb927.1.3040	Tb927.1.3040	1874	-0.0665	1	-0.212	0.591587	608	-0.1678	1	-0.186	0.667796	0.2907	0.00478
Tb927.1.3050	Tb927.1.3050	2364	-0.1361	1	-0.3259	0.324078	500	-0.0876	1	-0.0581	0.939691	-0.0751	0.411
Tb927.1.3070	Tb927.1.3070	1116	-0.0662	1	-0.3948	0.496454	443	-0.1309	1	-0.2149	0.60514	0.1094	0.257
Tb927.1.3110	Tb927.1.3110	1330	-0.0199	1	-0.0457	0.93727	800	-0.0139	1	0.1017	0.834846	0.2927	0.000579
Tb927.1.3120	Tb927.1.3120	995	0.1122	1	-0.0894	0.908698	#N/A	#N/A	#N/A	#N/A	#N/A	0.1932	0.0312
Tb927.1.3130	Tb927.1.3130	801	0.1934	1	0.039	0.961035	#N/A	#N/A	#N/A	#N/A	#N/A	0.1349	0.195
Tb927.1.3150	Tb927.1.3150	1306	0.165	0.881165	0.0893	0.821872	1185	0.1092	0.994489	0.3129	0.0638169	0.3317	3.97e-05
Tb927.1.3170	Tb927.1.3170	1453	-0.0878	1	-0.1807	0.749793	790	-0.1152	1	-0.0192	0.971173	0.1856	0.0536
Tb927.1.3180	Tb927.1.3180	24827	-0.2115	0.805629	-0.2949	0.323694	24708	-0.2665	0.902516	-0.3767	0.421194	0.0524	0.593
Tb927.1.3200	Tb927.1.3200	1120	0.5417	0.0702577	0.4845	0.103518	1190	0.5716	0.0199596	0.5865	0.0116783	0.5456	4.62e-11
Tb927.1.3220	Tb927.1.3220	803	0.0329	1	-0.155	0.865235	#N/A	#N/A	#N/A	#N/A	#N/A	0.2089	0.00907
Tb927.1.3230	Tb927.1.3230	2827	0.0085	1	-0.254	0.731791	#N/A	#N/A	#N/A	#N/A	#N/A	0.2106	0.0261
Tb927.1.3250	Tb927.1.3250	1221	0.1279	1	-0.1666	0.800011	591	0.1234	1	0.0643	0.926333	0.0195	0.851
Tb927.1.3260	Tb927.1.3260	1697	0.0049	1	-0.2849	0.704023	#N/A	#N/A	#N/A	#N/A	#N/A	-0.0127	0.894
Tb927.1.3270	Tb927.1.3270	1309	0.032	1	-0.2354	0.596509	#N/A	#N/A	#N/A	#N/A	#N/A	0.1924	0.012
Tb927.1.3280	Tb927.1.3280	1092	0.0227	1	0.0122	0.982372	605	0.0703	1	-0.0073	0.997243	0.2589	0.0192
Tb927.1.3290	Tb927.1.3290	1390	-0.0422	1	-0.2173	0.709248	67	0.059	1	0.0475	0.961035	0.2971	1.44e-05
Tb927.1.3300	Tb927.1.3300	788	0.0569	1	-0.1647	0.788279	1128	0.0037	1	0.3707	0.657121	0.0093	0.923
Tb927.1.3310	Tb927.1.3310	1748	0.1877	1	0.5755	0.581291	254	0.2166	1	0.5995	0.611669	0.1103	0.238
Tb927.1.3320	Tb927.1.3320	39	0.2839	1	1.2405	0.120197	#N/A	#N/A	#N/A	#N/A	#N/A	0.1165	0.411
Tb927.1.3350	Tb927.1.3350	4	-0.6887	1	-0.5346	0.865973	#N/A	#N/A	#N/A	#N/A	#N/A	-0.9384	0.000981
Tb927.1.3360	Tb927.1.3360	3	-1.1157	0.990462	-0.2878	0.947334	#N/A	#N/A	#N/A	#N/A	#N/A	-1.4593	5.27e-05
Tb927.1.3390	Tb927.1.3390	716	-0.3923	0.152015	-0.016	0.980924	242	-0.6049	0.0901891	-0.1711	0.772696	0.1323	0.291
Tb927.1.3400	Tb927.1.3400	1418	-0.622	0.00222527	-0.6433	0.00098374	401	-0.5702	0.0539766	-0.5583	0.046639	-0.3447	0.000218
Tb927.1.3410.1	Tb927.1.3410	488	-0.7457	0.000785867	-0.7244	0.00188533	132	-0.8885	0.176584	-0.7798	0.219109	-0.494	6.28e-08
Tb927.1.3410.2	Tb927.1.3410	491	-0.756	0.000574608	-0.7255	0.00171722	132	-0.8885	0.176584	-0.7798	0.219109	-0.494	6.28e-08
Tb927.1.3450	Tb927.1.3450	386	-0.6661	0.435459	0.1081	0.92674	276	-1.085	0.00162062	-1.0691	0.00195323	-0.6691	5.15e-19
Tb927.1.3550	Tb927.1.3550	154	2.7925	7.31343e-20	3.4157	1.08523e-20	801	1.0822	0.000329818	2.2438	2.88167e-17	0.8451	1.14e-25
Tb927.1.3560	Tb927.1.3560	573	0.1929	0.977161	0.0936	0.87642	337	0.1383	1	0.2408	0.727436	-0.0974	0.25
Tb927.1.3670	Tb927.1.3670	218	0.0796	1	0.1587	0.849573	46	0.0428	1	0.0584	0.95919	0.2481	0.00578
Tb927.1.3750	Tb927.1.3750	2	0.9149	1	0.7337	0.90408	#N/A	#N/A	#N/A	#N/A	#N/A	-0.5445	0.506
Tb927.1.3760	Tb927.1.3760	10	-0.3011	1	0.729	0.781583	#N/A	#N/A	#N/A	#N/A	#N/A	0.0172	0.968
Tb927.1.3800	Tb927.1.3800	537	-0.7522	0.00134054	-0.9596	8.2448e-06	#N/A	#N/A	#N/A	#N/A	#N/A	-0.387	0.0247
Tb927.1.3810	Tb927.1.3810	1419	-0.0954	1	-0.0039	1	423	-0.0563	1	0.0034	1	0.1086	0.419
Tb927.1.3820	Tb927.1.3820	1373	0.133	1	0.1954	0.750315	#N/A	#N/A	#N/A	#N/A	#N/A	0.1303	0.223
Tb927.1.3830	Tb927.1.3830	1745	0.5642	0.0848977	0.4867	0.14387	588	0.524	0.280974	0.5915	0.123033	-0.7651	4.35e-31
Tb927.1.3840	Tb927.1.3840	1102	0.0561	1	-0.0864	0.846935	314	-0.0262	1	0.1038	0.870247	0.1649	0.0667
Tb927.1.3850	Tb927.1.3850	1165	0.3361	0.543072	0.3662	0.324258	4487	0.3099	0.228473	0.4409	0.0176308	-0.1111	0.249
Tb927.1.3860	Tb927.1.3860	1755	0.038	1	-0.1898	0.829628	#N/A	#N/A	#N/A	#N/A	#N/A	0.2479	0.000537
Tb927.1.3880	Tb927.1.3880	1217	0.388	0.961988	0.0376	0.980924	#N/A	#N/A	#N/A	#N/A	#N/A	0.2236	0.000626
Tb927.1.3890	Tb927.1.3890	313	0.196	1	0.0227	0.989789	441	0.151	1	0.1919	0.845347	0.0588	0.72
Tb927.1.3910	Tb927.1.3910	1788	0.0039	1	-0.2413	0.694186	493	-0.0804	1	-0.0688	0.937194	0.0781	0.393
Tb927.1.3940	Tb927.1.3940	2359	-0.0732	1	-0.3781	0.536828	337	0.026	1	-0.1579	0.85221	0.1288	0.14
Tb927.1.3950	Tb927.1.3950	793	0.5552	0.761919	0.4096	0.682722	1343	0.4444	0.761919	0.6512	0.249167	-0.1525	0.109
Tb927.1.4010	Tb927.1.4010	355	0.9147	0.00131536	1.1654	2.80478e-05	16	0.6284	0.753108	1.8284	0.0772344	0.2867	0.000101
Tb927.1.4020	Tb927.1.4020	66	0.9637	0.110663	1.8012	0.000439922	631	0.8746	0.146426	1.0418	0.0359726	0.4236	6.6e-06
Tb927.1.4040	Tb927.1.4040	372	0.4101	0.80616	0.2847	0.727436	#N/A	#N/A	#N/A	#N/A	#N/A	0.2382	0.0143
Tb927.1.4050	Tb927.1.4050	633	0.0391	1	-0.2118	0.865973	1240	-0.0468	1	0.1422	0.827577	-0.2362	0.000174
Tb927.1.4100	Tb927.1.4100	4205	0.5836	0.143107	0.8939	0.00263383	3051	0.1186	1	0.6647	0.044936	1.2012	2.78e-69
Tb927.1.4140	Tb927.1.4140	303	0.0016	1	-0.1166	0.789263	276	0.0233	1	0.0415	0.956671	-0.059	0.709
Tb927.1.4160	Tb927.1.4160	1816	0.0648	1	-0.1596	0.805097	457	0.0752	1	0.0098	0.99562	0.2575	0.0149
Tb927.1.4180	Tb927.1.4180	742	0.018	1	-0.3839	0.584602	#N/A	#N/A	#N/A	#N/A	#N/A	-0.0621	0.504
Tb927.1.4220.1	Tb927.1.4220	1028	0.178	1	-0.0192	0.982372	700	0.1646	0.877583	0.0887	0.822833	0.2086	0.0201
Tb927.1.4220.2	Tb927.1.4220	1030	0.1784	1	-0.0169	0.98531	700	0.1646	0.877583	0.0887	0.822833	0.2086	0.0201
Tb927.1.4230	Tb927.1.4230	980	0.3049	0.994489	0.1981	0.825732	2031	0.4649	0.209298	0.5498	0.0621043	0.3801	2.04e-05
Tb927.1.4250	Tb927.1.4250	866	-0.0024	1	-0.2898	0.659742	349	-0.1199	1	-0.1551	0.834575	-0.0431	0.672
Tb927.1.4280	Tb927.1.4280	694	1.3904	0.00015168	1.0944	0.00576212	#N/A	#N/A	#N/A	#N/A	#N/A	0.2144	0.0065
Tb927.1.4300	Tb927.1.4300	209	0.9896	0.0876571	0.6751	0.38176	513	0.5271	0.50348	0.4047	0.545799	0.4559	2.35e-10
Tb927.1.4310	Tb927.1.4310	784	-0.115	1	-0.2413	0.715697	579	-0.4194	0.904481	-0.2273	0.825296	-0.3808	1.79e-07
Tb927.1.4340	Tb927.1.4340	810	0.4431	0.449792	1.3104	3.79937e-06	772	0.6856	0.075586	0.5691	0.152365	-0.0623	0.503
Tb927.1.4370	Tb927.1.4370	1534	0.1679	0.886639	0.2447	0.38923	383	-0.1864	0.994489	-0.2978	0.466452	-0.017	0.871
Tb927.1.4380	Tb927.1.4380	1646	0.017	1	-0.1347	0.727302	207	0.2236	0.930513	-0.2342	0.619635	0.0414	0.676
Tb927.1.4400	Tb927.1.4400	1277	0.3018	0.619731	0.1091	0.840053	268	0.2664	0.915304	0.2779	0.619635	0.2998	0.00191
Tb927.1.4410	Tb927.1.4410	1280	0.0901	1	-0.0504	0.932143	110	0.0356	1	0.1319	0.880141	-0.0203	0.898
Tb927.1.4420	Tb927.1.4420	853	-0.0795	1	-0.2934	0.775196	673	-0.0938	1	-0.1581	0.768198	0.4672	1.03e-10
Tb927.1.4450	Tb927.1.4450	773	-0.0132	1	-0.3788	0.572459	#N/A	#N/A	#N/A	#N/A	#N/A	0.0789	0.342
Tb927.1.4470	Tb927.1.4470	1416	-0.1513	1	-0.4375	0.228838	521	-0.2118	1	-0.4286	0.367364	-0.0248	0.842
Tb927.1.4480	Tb927.1.4480	1311	0.2206	1	-0.0935	0.919568	#N/A	#N/A	#N/A	#N/A	#N/A	-0.1011	0.178
Tb927.1.4490	Tb927.1.4490	535	1.5856	0.2038	4.8814	3.60044e-10	1207	0.3803	0.955624	1.8849	9.36591e-06	-0.2769	0.0021
Tb927.1.4500	Tb927.1.4500	1074	0.0386	1	0.063	0.876828	1484	-0.0513	1	-0.1179	0.859561	0.1328	0.121
Tb927.1.4520	Tb927.1.4520	309	0.2712	0.981336	0.1944	0.823178	295	0.0379	1	0.6402	0.167258	-0.0968	0.293
Tb927.1.4540	Tb927.1.4540	195	0.8138	0.565111	1.15	0.161702	438	0.697	0.0421079	0.8261	0.00750087	0.5072	4.65e-09
Tb927.1.4560	Tb927.1.4560	247	0.8276	0.174582	0.8552	0.138368	#N/A	#N/A	#N/A	#N/A	#N/A	0.4816	3.04e-08
Tb927.1.4580	Tb927.1.4580	177	0.8583	0.238041	0.8417	0.234564	#N/A	#N/A	#N/A	#N/A	#N/A	0.3932	8.99e-05
Tb927.1.4600	Tb927.1.4600	259	0.7395	0.527257	1.1039	0.109356	#N/A	#N/A	#N/A	#N/A	#N/A	0.5752	4.13e-14
Tb927.1.4630	Tb927.1.4630	220	0.7877	0.14487	1.1412	0.0122473	#N/A	#N/A	#N/A	#N/A	#N/A	0.461	3.01e-08
Tb927.1.4650	Tb927.1.4650	177	1.5509	0.000113242	4.0741	2.48089e-19	558	1.359	0.328184	2.1556	0.0160714	-0.7768	1.13e-32
Tb927.1.4680	Tb927.1.4680	818	0.0013	1	0.1846	0.781649	#N/A	#N/A	#N/A	#N/A	#N/A	-0.1771	0.213
Tb927.1.4690	Tb927.1.4690	2043	-0.1811	0.852424	0.0162	0.978742	1524	-0.1622	1	0.1897	0.715697	-0.4488	5.73e-10
Tb927.1.4700	Tb927.1.4700	727	0.2065	0.934575	0.1815	0.709488	433	0.026	1	0.2345	0.542992	0.545	1.76e-09
Tb927.1.4710	Tb927.1.4710	140	-0.0117	1	0.5144	0.518806	#N/A	#N/A	#N/A	#N/A	#N/A	-0.0445	0.779
Tb927.1.4720	Tb927.1.4720	2177	-0.0127	1	-0.1707	0.701395	#N/A	#N/A	#N/A	#N/A	#N/A	-0.0146	0.89
Tb927.1.4730	Tb927.1.4730	827	0.0171	1	0.0601	0.929405	511	0.021	1	-0.0519	0.93727	0.013	0.931
Tb927.1.4740	Tb927.1.4740	1264	0.3076	1	-0.1804	0.854735	#N/A	#N/A	#N/A	#N/A	#N/A	0.1888	0.00751
Tb927.1.4760	Tb927.1.4760	1346	0.009	1	-0.2005	0.701777	345	-0.096	1	-0.1246	0.895305	0.0803	0.318
Tb927.1.4780	Tb927.1.4780	1197	-0.1368	1	-0.2598	0.596689	#N/A	#N/A	#N/A	#N/A	#N/A	0.2119	0.00734
Tb927.1.4800	Tb927.1.4800	881	0.0666	1	0.0601	0.869349	#N/A	#N/A	#N/A	#N/A	#N/A	0.279	0.00368
Tb927.1.4810	Tb927.1.4810	459	0.1097	1	-0.019	0.982761	54	0.026	1	0.2924	0.69159	1.0308	1.91e-19
Tb927.1.4830	Tb927.1.4830	1687	0.1597	1	0.3571	0.516377	1130	0.1658	1	0.4888	0.392235	0.3221	0.000779
Tb927.1.4860	Tb927.1.4860	4	0.2155	1	-1.2224	0.702166	#N/A	#N/A	#N/A	#N/A	#N/A	-0.3389	0.0461
Tb927.1.4870	Tb927.1.4870	3	-0.0824	1	-1.0509	0.840824	#N/A	#N/A	#N/A	#N/A	#N/A	-0.0608	0.622
Tb927.1.4890	Tb927.1.4890	5	0.2314	1	-0.5359	0.881936	#N/A	#N/A	#N/A	#N/A	#N/A	-0.2974	0.00123
Tb927.1.4900	Tb927.1.4900	4	-0.6206	1	0.5441	0.917337	#N/A	#N/A	#N/A	#N/A	#N/A	-0.167	0.0499
Tb927.1.4910	Tb927.1.4910	2	0.1972	1	1.6984	0.733052	1	1.1123	1	-1.2193	0.803492	-0.3592	7.12e-05
Tb927.1.4920	Tb927.1.4920	5	0.0897	1	0.5219	0.828429	#N/A	#N/A	#N/A	#N/A	#N/A	0.112	0.55
Tb927.1.4970	Tb927.1.4970	29	-0.383	1	-0.9533	0.458513	363	-0.136	1	-0.4308	0.193812	0.0616	0.847
Tb927.1.5000	Tb927.1.5000	1006	-0.0111	1	-0.0525	0.957541	849	0.024	1	0.1322	0.797343	0.2284	0.0394
Tb927.1.5030	Tb927.1.5030	622	0.1185	1	0.0902	0.879856	354	0.0644	1	-0.0215	0.977	-0.0313	0.781
Tb927.1.5060	Tb927.1.5060	25	-0.8973	0.886639	-0.7497	0.744507	#N/A	#N/A	#N/A	#N/A	#N/A	-0.5659	2.47e-05
Tb927.1.5080	Tb927.1.5080	2	-1.553	0.932206	1.0311	0.821958	#N/A	#N/A	#N/A	#N/A	#N/A	-0.1651	0.294
Tb927.1.5090	Tb927.1.5090	1	-2.9319	1	0.8005	0.943011	#N/A	#N/A	#N/A	#N/A	#N/A	0.044	0.862
Tb927.1.5100	Tb927.1.5100	5	-0.0521	1	-1.4209	0.689229	#N/A	#N/A	#N/A	#N/A	#N/A	-0.4687	6.32e-09
Tb927.1.5110	Tb927.1.5110	4	-0.3622	1	1.0102	0.806871	#N/A	#N/A	#N/A	#N/A	#N/A	-0.1085	0.249
Tb927.1.5120	Tb927.1.5120	2	-0.1239	1	-0.1612	0.985449	#N/A	#N/A	#N/A	#N/A	#N/A	-0.5661	1.96e-09
Tb927.1.5150	Tb927.1.5150	0	1.3508	1	0	1	#N/A	#N/A	#N/A	#N/A	#N/A	-0.5674	0.0418
Tb927.1.5160	Tb927.1.5160	1	0.6364	1	-1.123	0.906181	#N/A	#N/A	#N/A	#N/A	#N/A	-0.493	0.000908
Tb927.1.5170	Tb927.1.5170	1	1.0654	1	-1.2559	0.83782	#N/A	#N/A	#N/A	#N/A	#N/A	-0.7205	4.1e-11
Tb927.1.5180	Tb927.1.5180	0	1.7291	NA	0	NA	#N/A	#N/A	#N/A	#N/A	#N/A	-0.8441	1.48e-10
Tb927.1.5200	Tb927.1.5200	3	-0.9968	0.944494	-0.1238	0.982372	#N/A	#N/A	#N/A	#N/A	#N/A	-0.3471	0.00843
Tb927.1.5220	Tb927.1.5220	0	#VALUE!	NA	#VALUE!	NA	#N/A	#N/A	#N/A	#N/A	#N/A	0	0
Tb927.1.5235	Tb927.1.5235	0	#VALUE!	NA	#VALUE!	NA	#N/A	#N/A	#N/A	#N/A	#N/A	0	0
Tb927.1.5240	Tb927.1.5240	1	-1.0074	1	-2.1346	0.712904	#N/A	#N/A	#N/A	#N/A	#N/A	-0.0098	0.968
Tb927.1.5250	Tb927.1.5250	0	#VALUE!	NA	#VALUE!	NA	#N/A	#N/A	#N/A	#N/A	#N/A	-0.3273	0.573
Tb927.1.5260	Tb927.1.5260	0	#VALUE!	NA	#VALUE!	NA	#N/A	#N/A	#N/A	#N/A	#N/A	-0.428	0.347
Tb927.1.5280	Tb927.1.5280	0	0.4012	1	0	1	0	0.7793	NA	0	NA	-2.3463	0.0916
Tb927.1.5300	Tb927.1.5300	0	#VALUE!	NA	#VALUE!	NA	#N/A	#N/A	#N/A	#N/A	#N/A	0	0
Tb927.1.5320	Tb927.1.5320	0	-1.1442	NA	0.8005	NA	#N/A	#N/A	#N/A	#N/A	#N/A	-2.5258	NA
Tb927.1.5330	Tb927.1.5330	0	-1.1442	NA	0	NA	#N/A	#N/A	#N/A	#N/A	#N/A	0	0
Tb927.1.5340	Tb927.1.5340	1	0.7793	1	0	1	#N/A	#N/A	#N/A	#N/A	#N/A	-0.1525	0.624
Tb927.2.100	Tb927.2.100	2456	-0.2955	0.936074	-0.3473	0.578683	#N/A	#N/A	#N/A	#N/A	#N/A	-0.307	3.55e-05
Tb927.2.160	Tb927.2.160	12	-0.1185	1	-0.2914	0.874354	#N/A	#N/A	#N/A	#N/A	#N/A	-0.3377	0.384
Tb927.2.170	Tb927.2.170	265	-0.1223	1	0.1214	0.895951	159	-0.4946	0.691937	-0.2057	0.834632	-0.5443	6.69e-11
Tb927.2.200	Tb927.2.200	16	-0.7375	0.921484	0.602	0.817222	1	-0.5456	1	-1.1812	0.868961	-0.7217	2.47e-13
Tb927.2.220	Tb927.2.220	41	-0.4133	0.872491	-1.0032	0.435531	1	-0.8039	1	-2.0307	0.763506	0.0817	0.608
Tb927.2.240	Tb927.2.240	327	-0.6688	0.562163	-1.34	0.0198791	#N/A	#N/A	#N/A	#N/A	#N/A	-0.0764	0.502
Tb927.2.270	Tb927.2.270	138	-0.6431	0.149811	-0.4179	0.548085	#N/A	#N/A	#N/A	#N/A	#N/A	0.3113	0.000135
Tb927.2.280	Tb927.2.280	979	-0.7285	0.0574335	-1.0565	0.000961494	301	-0.7894	0.0565624	-0.7176	0.0769028	0.0966	0.236
Tb927.2.300	Tb927.2.300	387	-0.9167	0.0785182	-0.7285	0.205969	5	-1.6388	0.62883	-2.7853	0.379344	0.2335	0.0132
Tb927.2.340	Tb927.2.340	3650	-0.6778	0.0708603	-0.8376	0.00865298	165	-1.0296	0.000585037	-0.8208	0.0153204	-0.2068	0.00446
Tb927.2.370	Tb927.2.370	1925	-0.3551	0.927973	-0.3132	0.700493	1030	-0.5449	0.527257	-0.1885	0.834548	-0.2091	0.00481
Tb927.2.380	Tb927.2.380	1270	-0.7992	0.106103	-1.1209	0.00501513	349	-0.7478	0.0330017	-0.6963	0.042934	0.0772	0.395
Tb927.2.400	Tb927.2.400	819	-0.6781	0.116261	-1.0451	0.00214163	354	-0.6762	0.0327766	-0.7266	0.013268	0.0571	0.583
Tb927.2.420	Tb927.2.420	475	-0.7947	0.219484	-0.5559	0.448013	4	-1.3972	0.673948	-0.0228	1	0.1843	0.0556
Tb927.2.450	Tb927.2.450	3763	-0.6836	0.0301321	-0.5069	0.148378	588	-0.5631	0.0520726	-0.2511	0.565608	-0.1898	0.012
Tb927.2.460	Tb927.2.460	1008	-0.7926	0.300257	-0.5756	0.470792	9	-1.061	0.6226	-0.5988	0.840894	0.1702	0.059
Tb927.2.470	Tb927.2.470	1914	-0.7908	0.00890324	-0.721	0.018661	166	-1.0046	4.72915e-05	-0.5933	0.0596093	-0.2397	0.00151
Tb927.2.480	Tb927.2.480	719	-0.6974	0.199119	-1.0307	0.0122381	420	-0.8967	0.0104637	-0.7903	0.0307145	-0.0335	0.748
Tb927.2.490	Tb927.2.490	608	-0.8444	0.105126	-0.5196	0.429153	5	-1.9152	0.19279	-0.5661	0.883359	0.1683	0.115
Tb927.2.510	Tb927.2.510	330	-0.9965	0.00514413	-1.2649	0.000478566	#N/A	#N/A	#N/A	#N/A	#N/A	-0.1214	0.228
Tb927.2.540	Tb927.2.540	636	-0.7472	0.299124	-0.5888	0.414304	63	-1.1947	0.0383468	-0.9156	0.280063	0.0956	0.364
Tb927.2.560	Tb927.2.560	1537	-0.3098	0.774042	-0.2947	0.568736	#N/A	#N/A	#N/A	#N/A	#N/A	-0.0028	0.98
Tb927.2.650	Tb927.2.650	154	-0.2945	1	-0.1148	0.917359	#N/A	#N/A	#N/A	#N/A	#N/A	-0.1744	0.152
Tb927.2.660	Tb927.2.660	61	0.976	0.00649427	1.032	0.016251	9	0.4115	1	2.1075	0.0837862	-0.0534	0.642
Tb927.2.680	Tb927.2.680	32	0.1828	1	0.1054	0.938785	#N/A	#N/A	#N/A	#N/A	#N/A	-0.1012	0.743
Tb927.2.690	Tb927.2.690	122	-0.1886	1	0.0579	0.974609	149	-0.9422	0.166854	-0.7673	0.318101	-0.5103	3.35e-11
Tb927.2.720	Tb927.2.720	16	-0.883	0.702231	-0.9416	0.64149	767	0.1206	1	0.5074	0.446266	-0.1387	0.6
Tb927.2.820	Tb927.2.820	2150	-0.5375	0.379483	-0.6594	0.130846	#N/A	#N/A	#N/A	#N/A	#N/A	-0.2137	0.0011
Tb927.2.830	Tb927.2.830	333	-0.4022	0.411006	-0.582	0.131901	18	-0.4671	0.939144	-0.5948	0.68242	-0.0725	0.532
Tb927.2.900	Tb927.2.900	97	-0.3605	0.840947	-0.3094	0.687233	258	-0.0935	1	0.208	0.642096	-0.1402	0.265
Tb927.2.910	Tb927.2.910	104	0.7496	0.265367	0.7257	0.296447	4	0.8208	1	1.3781	0.59707	-0.1385	0.14
Tb927.2.940	Tb927.2.940	22	-0.2697	1	0.1658	0.906387	#N/A	#N/A	#N/A	#N/A	#N/A	-0.134	0.674
Tb927.2.950	Tb927.2.950	107	0.0426	1	-0.1804	0.877836	43	-0.7362	0.685828	-0.2791	0.858282	-0.517	6.81e-10
Tb927.2.960	Tb927.2.960	8	-2.2113	0.0168605	-1.934	0.157862	127	-1.0155	0.422589	-0.9085	0.414281	-2.298	4.81e-13
Tb927.2.980	Tb927.2.980	41	-0.5254	1	-1.0054	0.496615	814	-0.0436	1	0.2546	0.753039	-0.5833	0.000159
Tb927.2.1050	Tb927.2.1050	660	-0.1967	1	-0.0878	0.945324	219	-0.4294	0.84113	0.0489	0.971233	-0.1582	0.0411
Tb927.2.1060	Tb927.2.1060	4	-0.6139	1	-0.3654	0.92501	#N/A	#N/A	#N/A	#N/A	#N/A	-0.5775	0.164
Tb927.2.1080	Tb927.2.1080	482	-0.6604	0.248121	-0.9176	0.0423334	634	-0.5889	0.0536467	-0.8558	0.000661485	-0.0217	0.855
Tb927.2.1100	Tb927.2.1100	100	-0.2685	1	0.1704	0.917337	23	-0.275	1	0.722	0.646973	0.4594	1.89e-07
Tb927.2.1110	Tb927.2.1110	476	-0.6433	0.380232	-0.5407	0.427844	105	-1.1873	0.00882134	-0.9376	0.0824441	0.1961	0.0474
Tb927.2.1120	Tb927.2.1120	715	-0.72	0.0114178	-0.554	0.08363	#N/A	#N/A	#N/A	#N/A	#N/A	-0.3286	0.00151
Tb927.2.1130	Tb927.2.1130	37	-0.0732	1	-0.2759	0.883002	56	-0.573	0.754112	0.1408	0.922546	0.5486	3.75e-06
Tb927.2.1140	Tb927.2.1140	221	-0.2884	1	-0.1596	0.878091	35	-0.0043	1	-0.6315	0.616715	0.159	0.172
Tb927.2.1150	Tb927.2.1150	271	-0.6183	0.146561	-0.9305	0.00924569	866	-0.8584	0.000266663	-0.8296	0.000435285	-0.0591	0.678
Tb927.2.1160	Tb927.2.1160	55	-0.8906	0.0535163	-1.2746	0.144002	1	-0.1794	1	-0.9542	0.900465	-0.3223	0.0245
Tb927.2.1170	Tb927.2.1170	198	-0.8126	0.166894	-1.4788	0.00259426	#N/A	#N/A	#N/A	#N/A	#N/A	-0.1452	0.198
Tb927.2.1180	Tb927.2.1180	230	-0.2833	0.998401	-0.5199	0.508168	46	0.6559	0.612891	0.64	0.532544	0.3175	6.11e-05
Tb927.2.1200	Tb927.2.1200	580	-0.8016	0.175531	-0.5933	0.373752	470	-1.2035	0.0347718	-1.1332	0.0487726	0.1398	0.147
Tb927.2.1210	Tb927.2.1210	1128	-0.2945	0.786069	-0.3561	0.430691	#N/A	#N/A	#N/A	#N/A	#N/A	0.0109	0.928
Tb927.2.1250	Tb927.2.1250	153	-0.1603	1	0.0791	0.946277	60	0.0343	1	0.1824	0.870646	-0.0875	0.474
Tb927.2.1260	Tb927.2.1260	105	0.7423	0.0173383	-0.0381	0.965728	#N/A	#N/A	#N/A	#N/A	#N/A	-0.1181	0.265
Tb927.2.1290	Tb927.2.1290	1	-0.2138	1	-1.123	0.87529	#N/A	#N/A	#N/A	#N/A	#N/A	0.23	0.629
Tb927.2.1310	Tb927.2.1310	128	-0.0341	1	-0.2429	0.851099	128	-0.855	0.372528	-0.6326	0.524337	-0.4022	7.44e-05
Tb927.2.1330	Tb927.2.1330	647	-0.4681	0.872491	-0.2609	0.813959	#N/A	#N/A	#N/A	#N/A	#N/A	0.1493	0.131
Tb927.2.1344	Tb927.2.1344	51	-0.1912	1	0.312	0.772696	#N/A	#N/A	#N/A	#N/A	#N/A	0.1592	0.413
Tb927.2.1350	Tb927.2.1350	52	-0.2961	1	-0.1187	0.941087	#N/A	#N/A	#N/A	#N/A	#N/A	-0.4609	0.0162
Tb927.2.1380	Tb927.2.1380	31	-0.4676	0.902119	0.3354	0.76024	#N/A	#N/A	#N/A	#N/A	#N/A	-2.9731	1.04e-14
Tb927.2.1460	Tb927.2.1460	16	-0.1439	1	0.328	0.852347	#N/A	#N/A	#N/A	#N/A	#N/A	-0.2681	0.402
Tb927.2.1470	Tb927.2.1470	8	1.1264	0.772693	0.4724	0.872622	#N/A	#N/A	#N/A	#N/A	#N/A	-0.0608	0.908
Tb927.2.1560	Tb927.2.1560	860	0.0563	1	-0.0441	0.978742	87	-0.0569	1	-0.1892	0.889566	0.0156	0.9
Tb927.2.1600	Tb927.2.1600	37	0.0355	1	-0.4457	0.788193	59	-0.1534	1	-0.2389	0.872349	0.3843	1.47e-05
Tb927.2.1680	Tb927.2.1680	1732	0.0506	1	0.0676	0.960118	744	0.0121	1	0.123	0.904801	0.1033	0.233
Tb927.2.1700	Tb927.2.1700	621	0.2629	1	-0.0846	0.943627	1991	0.0176	1	-0.1301	0.871338	0.516	3.88e-13
Tb927.2.1720	Tb927.2.1720	700	0.1682	1	0.1804	0.830822	95	0.5902	0.69412	-0.0166	0.996137	0.3183	0.0384
Tb927.2.1730	Tb927.2.1730	1031	-0.0965	1	-0.1022	0.908698	27	-0.3259	1	-0.2897	0.788193	0.0656	0.661
Tb927.2.1740	Tb927.2.1740	268	0.4899	0.808134	1.0912	0.0419131	1591	0.1472	1	0.4822	0.379344	0.301	0.0179
Tb927.2.1760	Tb927.2.1760	2098	-0.089	1	-0.1331	0.925744	647	-0.0249	1	0.0707	0.945507	0.4609	1.11e-12
Tb927.2.1770	Tb927.2.1770	268	0.3353	1	0.8922	0.114701	#N/A	#N/A	#N/A	#N/A	#N/A	0.4234	0.00656
Tb927.2.1780	Tb927.2.1780	556	-0.1146	1	-0.2123	0.791718	#N/A	#N/A	#N/A	#N/A	#N/A	0.206	0.104
Tb927.2.1790	Tb927.2.1790	673	-0.0109	1	-0.1155	0.908601	742	-0.0579	1	-0.2213	0.777336	0.2667	0.186
Tb927.2.1800	Tb927.2.1800	2021	-0.017	1	-0.2495	0.73726	735	-0.0511	1	0.0247	0.977515	0.0288	0.735
Tb927.2.1810	Tb927.2.1810	1892	0.066	1	-0.0998	0.929405	302	0.0523	1	0.3974	0.416518	-0.4401	2.4e-09
Tb927.2.1820	Tb927.2.1820	238	2.1963	2.01323e-09	0.8849	0.0784144	254	1.913	0.000212565	1.8318	0.000528155	0.7102	3.73e-27
Tb927.2.1850	Tb927.2.1850	830	0.1316	1	0.3992	0.677731	156	0.1026	1	0.2926	0.806871	-0.0902	0.357
Tb927.2.1860	Tb927.2.1860	1148	-0.1558	1	-0.2695	0.70939	#N/A	#N/A	#N/A	#N/A	#N/A	0.0714	0.409
Tb927.2.1890	Tb927.2.1890	632	0.3063	1	0.8076	0.170003	232	-0.1154	1	0.3948	0.714518	0.0973	0.401
Tb927.2.1920	Tb927.2.1920	448	0.3214	0.915304	0.4917	0.392762	278	0.708	0.0329782	0.6201	0.0674826	0.1417	0.0916
Tb927.2.2015	Tb927.2.2015	28	-0.6093	0.966321	-0.2536	0.88474	62	-0.4027	1	-0.2862	0.818157	-0.3456	0.335
Tb927.2.2020	Tb927.2.2020	119	-1.0088	0.0469682	-1.3304	0.00399058	#N/A	#N/A	#N/A	#N/A	#N/A	-0.6259	4.3e-09
Tb927.2.2029	Tb927.2.2029	31	-0.5501	0.863469	-1.6617	0.0288033	#N/A	#N/A	#N/A	#N/A	#N/A	-0.9285	1.33e-16
Tb927.2.2060	Tb927.2.2060	16	-0.5654	0.978669	-0.4479	0.802605	#N/A	#N/A	#N/A	#N/A	#N/A	-0.8448	7.02e-27
Tb927.2.2070	Tb927.2.2070	80	-0.8914	0.116164	-0.4592	0.55673	#N/A	#N/A	#N/A	#N/A	#N/A	-0.5212	0.000717
Tb927.2.2090	Tb927.2.2090	839	-0.2101	1	-0.1591	0.865235	156	-0.2694	0.994489	0.1892	0.817104	-0.1386	0.116
Tb927.2.2120	Tb927.2.2120	406	0.5802	0.284145	0.8361	0.0310607	#N/A	#N/A	#N/A	#N/A	#N/A	-0.2723	0.00242
Tb927.2.2130	Tb927.2.2130	499	-0.6535	0.242087	-0.4712	0.444684	371	-0.6047	0.344393	-0.6744	0.179301	-0.1512	0.246
Tb927.2.2140	Tb927.2.2140	324	-0.7361	0.168185	-0.5073	0.423735	175	-0.6298	0.458784	-0.3329	0.706379	-0.0413	0.883
Tb927.2.2160	Tb927.2.2160	1197	0.1574	1	0.1493	0.875726	1094	0.2295	1	0.3016	0.785843	0.2794	5.5e-05
Tb927.2.2180	Tb927.2.2180	1149	-0.1164	1	-0.1692	0.562901	597	-0.1635	0.855721	-0.103	0.769461	-0.1247	0.247
Tb927.2.2190	Tb927.2.2190	432	0.2473	0.979636	0.1892	0.788704	918	0.1087	1	0.1817	0.712669	-0.0077	0.952
Tb927.2.2200	Tb927.2.2200	396	-0.0895	1	-0.0161	0.9893	347	-0.12	1	0.0801	0.917337	-0.1708	0.198
Tb927.2.2210	Tb927.2.2210	1455	-0.0778	1	-0.0982	0.873903	#N/A	#N/A	#N/A	#N/A	#N/A	-0.1893	0.0113
Tb927.2.2220	Tb927.2.2220	432	-0.1668	1	-0.2544	0.561966	#N/A	#N/A	#N/A	#N/A	#N/A	-0.0946	0.534
Tb927.2.2230	Tb927.2.2230	1104	-0.149	1	-0.1214	0.832978	666	-0.1922	0.979636	-0.0972	0.86585	-0.5739	1.13e-11
Tb927.2.2240	Tb927.2.2240	1691	0.1055	1	-0.2614	0.681798	#N/A	#N/A	#N/A	#N/A	#N/A	-0.0692	0.389
Tb927.2.2260	Tb927.2.2260	360	0.7601	0.429661	0.8339	0.264332	#N/A	#N/A	#N/A	#N/A	#N/A	0.5242	4.45e-16
Tb927.2.2270	Tb927.2.2270	664	-0.0007	1	0.067	0.88474	#N/A	#N/A	#N/A	#N/A	#N/A	-0.2002	0.0998
Tb927.2.2320	Tb927.2.2320	28	1.5451	0.0472958	3.6249	0.000101646	#N/A	#N/A	#N/A	#N/A	#N/A	-0.5676	0.000738
Tb927.2.2340	Tb927.2.2340	228	1.9497	3.10395e-13	1.3188	4.01206e-05	26	2.2053	0.00365377	1.6844	0.0519576	0.0849	0.284
Tb927.2.2360	Tb927.2.2360	515	1.0354	2.59303e-05	1.4101	2.44727e-09	325	0.7213	0.0121796	1.1968	5.33214e-07	0.0347	0.739
Tb927.2.2370	Tb927.2.2370	1396	-0.1438	1	-0.3452	0.575315	458	-0.1709	1	-0.2562	0.794158	-0.3231	2.91e-06
Tb927.2.2380	Tb927.2.2380	787	0.153	1	-0.1265	0.870646	220	-0.1387	1	-0.3269	0.493406	-0.3197	0.0001
Tb927.2.2390	Tb927.2.2390	1055	0.0147	1	-0.2669	0.350242	3125	-0.0165	1	-0.221	0.534854	-0.051	0.693
Tb927.2.2400	Tb927.2.2400	488	1.2483	0.0020312	2.1316	3.69735e-09	#N/A	#N/A	#N/A	#N/A	#N/A	0.1103	0.249
Tb927.2.2410	Tb927.2.2410	1049	-0.216	0.781542	-0.3822	0.128725	232	-0.2014	1	-0.2425	0.644447	-0.3431	0.000193
Tb927.2.2430	Tb927.2.2430	289	0.0351	1	-0.856	0.2994	1085	0.1076	1	0.253	0.691963	-0.0876	0.392
Tb927.2.2440	Tb927.2.2440	1974	0.1531	1	0.2648	0.489954	323	0.0576	1	0.1312	0.828143	-0.0131	0.904
Tb927.2.2450	Tb927.2.2450	1265	0.1068	1	0.0072	0.994622	#N/A	#N/A	#N/A	#N/A	#N/A	0.0892	0.418
Tb927.2.2460	Tb927.2.2460	328	0.5335	0.849172	0.0144	0.997933	1747	0.4542	0.0688654	0.396	0.116466	0.303	0.00104
Tb927.2.2470	Tb927.2.2470	1547	0.0629	1	-0.0059	0.998896	#N/A	#N/A	#N/A	#N/A	#N/A	0.1785	0.0274
Tb927.2.2490	Tb927.2.2490	258	-0.2651	1	-0.4669	0.711653	111	-0.2618	1	-0.2961	0.810608	0.2378	0.00295
Tb927.2.2500	Tb927.2.2500	1630	0.0476	1	-0.1116	0.856879	826	0.0315	1	-0.03	0.968842	0.0227	0.899
Tb927.2.2510	Tb927.2.2510	5550	0.0489	1	0.0527	0.923016	#N/A	#N/A	#N/A	#N/A	#N/A	0.0448	0.627
Tb927.2.2520	Tb927.2.2520	5732	0.0252	1	-0.0019	1	4416	-0.0442	1	0.0907	0.900082	0.0969	0.248
Tb927.2.2530	Tb927.2.2530	1257	0.021	1	-0.1022	0.897095	637	0.0913	1	0.0048	0.999394	0.3144	8.37e-05
Tb927.2.2540	Tb927.2.2540	835	-0.1981	1	-0.2652	0.576279	734	-0.1176	1	-0.2369	0.63999	-0.1542	0.338
Tb927.2.2550	Tb927.2.2550	859	0.0875	1	-0.0104	0.991196	212	0.0379	1	0.0032	1	0.1074	0.338
Tb927.2.2570	Tb927.2.2570	299	0.0553	1	-0.0579	0.914538	#N/A	#N/A	#N/A	#N/A	#N/A	0.3842	0.00744
Tb927.2.2580	Tb927.2.2580	316	0.0442	1	-0.342	0.615188	321	0.1538	1	-0.015	0.991726	-0.1227	0.106
Tb927.2.2590	Tb927.2.2590	307	0.0001	1	-0.1741	0.791692	312	0.2245	1	-0.103	0.909277	0.3407	0.0184
Tb927.2.2650	Tb927.2.2650	679	-0.3139	1	-0.47	0.55572	376	-0.2618	1	-0.2803	0.75877	-0.2011	0.00205
Tb927.2.2670	Tb927.2.2670	487	-0.2274	0.936074	0.0549	0.93727	1827	-0.5097	0.0873026	-0.3563	0.304885	-0.7275	1.34e-25
Tb927.2.2720	Tb927.2.2720	153	0.8592	0.0414235	1.8596	9.40547e-07	170	0.3341	0.92107	0.6127	0.274264	0.1193	0.123
Tb927.2.2770	Tb927.2.2770	322	0.4853	0.932268	0.4851	0.650968	227	0.5061	0.973684	0.5554	0.63999	-0.4327	1.22e-05
Tb927.2.2830	Tb927.2.2830	149	-0.054	1	-0.0078	0.997243	105	-0.1303	1	-0.2763	0.54655	-0.5537	9.11e-10
Tb927.2.2860	Tb927.2.2860	333	0.2044	0.973684	0.3449	0.413092	#N/A	#N/A	#N/A	#N/A	#N/A	0.0406	0.735
Tb927.2.2880	Tb927.2.2880	248	0.0312	1	0.1607	0.836984	249	-0.1635	0.994489	-0.0739	0.886134	-0.1488	0.0877
Tb927.2.2900	Tb927.2.2900	301	-0.2905	0.946494	-0.1737	0.823694	#N/A	#N/A	#N/A	#N/A	#N/A	0.0535	0.724
Tb927.2.2910	Tb927.2.2910	637	-0.1983	0.883631	-0.3654	0.196781	83	-0.3472	0.758427	-0.162	0.805456	-0.0659	0.553
Tb927.2.2920	Tb927.2.2920	276	0.023	1	0.3097	0.420926	#N/A	#N/A	#N/A	#N/A	#N/A	0.0977	0.343
Tb927.2.2940	Tb927.2.2940	637	-0.1166	1	-0.0607	0.916028	252	-0.1782	1	-0.1018	0.864944	-0.0782	0.565
Tb927.2.2950	Tb927.2.2950	727	-0.4577	0.660208	-0.5552	0.322001	104	-0.4049	0.81914	-0.6889	0.177744	-0.4832	4.96e-09
Tb927.2.2970	Tb927.2.2970	110	-0.4261	0.949242	-0.6664	0.516377	#N/A	#N/A	#N/A	#N/A	#N/A	-0.4195	0.000309
Tb927.2.2990	Tb927.2.2990	1408	-0.361	0.767877	-0.6762	0.0841265	#N/A	#N/A	#N/A	#N/A	#N/A	-0.3089	0.000577
Tb927.2.3000	Tb927.2.3000	426	-0.3349	0.310199	-0.6041	0.003964	148	-0.4294	0.561929	-0.5778	0.137561	-0.3761	3.89e-05
Tb927.2.3020	Tb927.2.3020	412	-0.3601	0.381884	-0.554	0.0450527	#N/A	#N/A	#N/A	#N/A	#N/A	-0.4213	2.47e-09
Tb927.2.3030	Tb927.2.3030	1144	-0.1067	1	-0.4295	0.681493	#N/A	#N/A	#N/A	#N/A	#N/A	-0.0183	0.849
Tb927.2.3055	Tb927.2.3055	48	0.0394	1	-0.0398	0.982372	70	0.1389	1	0.5667	0.462644	-0.5241	0.00575
Tb927.2.3080	Tb927.2.3080	512	-0.1562	1	-0.0296	0.988988	26	-0.5288	1	-0.2373	0.904102	-0.6762	5.22e-21
Tb927.2.3090	Tb927.2.3090	75	-0.2724	1	0.286	0.84282	295	-0.4039	1	-0.0521	0.976369	-0.6243	9.43e-06
Tb927.2.3160	Tb927.2.3160	420	-0.4318	0.393574	-0.6558	0.0444985	331	-0.4825	0.324104	-0.559	0.131326	-0.362	0.000102
Tb927.2.3180	Tb927.2.3180	988	-0.2767	0.926515	-0.4653	0.323694	146	-0.2354	1	-0.4841	0.570244	-0.3211	0.000478
Tb927.2.3190	Tb927.2.3190	179	-0.2266	0.927308	-0.2249	0.659902	251	-0.1496	1	-0.1131	0.821083	-0.2139	0.123
Tb927.2.3270	Tb927.2.3270	4	-1.5887	0.839326	0.0301	1	5	-0.9045	0.994489	-1.1668	0.701395	-0.9481	3.26e-23
Tb927.2.3280	Tb927.2.3280	3	-1.6621	0.909021	-1.8248	0.706315	0	-3.0068	1	0	1	-0.7952	2.58e-09
Tb927.2.3290	Tb927.2.3290	2	-0.8347	1	-2.398	0.595964	8	-0.8853	0.924916	-2.2851	0.171448	-0.9296	4.19e-11
Tb927.2.3300	Tb927.2.3300	2	-1.3869	0.95723	-1.123	0.850089	#N/A	#N/A	#N/A	#N/A	#N/A	-0.8837	7.16e-09
Tb927.2.3310	Tb927.2.3310	2	-1.1506	1	0.7337	0.900368	8	-1.0592	0.666919	-1.2162	0.494953	-0.851	5.69e-11
Tb927.2.3320	Tb927.2.3320	8	-0.9785	0.818057	0.6903	0.807975	#N/A	#N/A	#N/A	#N/A	#N/A	-1.1637	9.79e-19
Tb927.2.3330	Tb927.2.3330	4	-0.6724	1	-0.7933	0.781583	#N/A	#N/A	#N/A	#N/A	#N/A	-1.4104	1.31e-08
Tb927.2.3340	Tb927.2.3340	39	-2.1594	6.48312e-06	-2.4272	3.32831e-06	38	-1.8457	0.000614037	-2.3341	4.94304e-06	-3.07	7.17e-87
Tb927.2.3370	Tb927.2.3370	423	0.2682	0.781542	0.1426	0.812436	506	0.0669	1	0.3459	0.339566	0.033	0.811
Tb927.2.3390	Tb927.2.3390	922	-0.1281	1	0.187	0.811153	1037	0.36	0.105537	0.6534	6.24865e-05	-0.2551	0.000744
Tb927.2.3400	Tb927.2.3400	929	-0.1175	1	-0.1153	0.761235	#N/A	#N/A	#N/A	#N/A	#N/A	-0.1377	0.441
Tb927.2.3420	Tb927.2.3420	578	-0.0114	1	0.24	0.747678	151	-0.0244	1	0.0723	0.938213	-0.0615	0.677
Tb927.2.3440	Tb927.2.3440	626	-0.0397	1	-0.1821	0.706886	#N/A	#N/A	#N/A	#N/A	#N/A	-0.1253	0.262
Tb927.2.3460	Tb927.2.3460	962	0.3372	0.682018	0.2094	0.718256	140	0.5666	0.610954	0.5163	0.535154	-0.1583	0.153
Tb927.2.3480	Tb927.2.3480	841	-0.2999	0.918188	-0.44	0.423156	602	-0.2711	0.642821	-0.1075	0.827345	-0.483	2.67e-06
Tb927.2.3580	Tb927.2.3580	427	0.6332	0.472568	0.9076	0.0850194	#N/A	#N/A	#N/A	#N/A	#N/A	-0.4019	3.82e-07
Tb927.2.3610	Tb927.2.3610	1827	-0.2436	0.972215	-0.1702	0.796207	2298	-0.301	0.837288	-0.091	0.89951	0.2336	0.0172
Tb927.2.3620	Tb927.2.3620	739	0.0229	1	-0.0268	0.984636	#N/A	#N/A	#N/A	#N/A	#N/A	-0.0061	0.952
Tb927.2.3660	Tb927.2.3660	1023	0.1399	1	0.2485	0.799238	#N/A	#N/A	#N/A	#N/A	#N/A	-0.2318	6.72e-05
Tb927.2.3720	Tb927.2.3720	144	2.2865	1.30133e-07	2.6714	3.22449e-05	436	1.4972	0.0102707	1.616	0.00369589	0.7604	6.09e-16
Tb927.2.3730	Tb927.2.3730	351	0.0306	1	-0.0288	0.979524	243	-0.0496	1	-0.0106	0.996137	-0.1342	0.129
Tb927.2.3750	Tb927.2.3750	661	-0.0702	1	-0.439	0.379344	261	-0.0557	1	-0.2091	0.765752	-0.2645	0.00176
Tb927.2.3780	Tb927.2.3780	2532	-0.3584	0.826228	-0.3987	0.506759	#N/A	#N/A	#N/A	#N/A	#N/A	-0.8846	3.32e-36
Tb927.2.3800	Tb927.2.3800	1011	-0.2808	1	-0.328	0.672196	1299	-0.2416	0.840947	-0.0875	0.878331	-0.243	0.000947
Tb927.2.3880	Tb927.2.3880	267	1.285	0.0609228	1.4584	0.0166469	#N/A	#N/A	#N/A	#N/A	#N/A	-0.3636	3.73e-06
Tb927.2.3910	Tb927.2.3910	851	-0.0713	1	-0.2677	0.569901	852	1.5827	0.00860471	1.3614	0.0272981	0.1662	0.0614
Tb927.2.3920	Tb927.2.3920	1530	-0.0566	1	-0.2941	0.591483	598	0.0301	1	-0.2441	0.689746	0.2241	0.0676
Tb927.2.3930	Tb927.2.3930	822	-0.0181	1	-0.1059	0.836204	386	-0.2379	0.765509	-0.1531	0.727153	-0.172	0.0307
Tb927.2.3960	Tb927.2.3960	419	-0.2687	0.62058	-0.2681	0.444423	124	-0.1988	1	-0.0255	0.98236	-0.0701	0.69
Tb927.2.3970	Tb927.2.3970	813	-0.1528	0.972946	0.047	0.922735	102	-0.3027	1	0.2495	0.75877	0.0054	0.969
Tb927.2.3990	Tb927.2.3990	618	-0.157	1	-0.4701	0.478239	#N/A	#N/A	#N/A	#N/A	#N/A	-0.1198	0.185
Tb927.2.4000	Tb927.2.4000	1166	-0.2985	0.853998	-0.411	0.392092	196	-0.3335	0.614116	-0.0411	0.95575	-0.257	0.00135
Tb927.2.4020	Tb927.2.4020	1442	-0.0125	1	-0.2199	0.366861	292	-0.0555	1	-0.0819	0.85221	0.0582	0.532
Tb927.2.4050	Tb927.2.4050	679	0.0622	1	0.1768	0.879513	602	0.0775	1	0.207	0.754544	0.0151	0.871
Tb927.2.4060	Tb927.2.4060	1287	0.0057	1	-0.2587	0.56557	#N/A	#N/A	#N/A	#N/A	#N/A	0.0057	0.953
Tb927.2.4090	Tb927.2.4090	1779	-0.2483	0.912114	-0.1203	0.849573	786	-0.318	0.818044	-0.2899	0.603892	-0.1053	0.275
Tb927.2.4110	Tb927.2.4110	1474	-0.0993	1	-0.0414	0.955595	#N/A	#N/A	#N/A	#N/A	#N/A	-0.1079	0.29
Tb927.2.4130	Tb927.2.4130	1780	-0.2908	0.439084	-0.3221	0.241333	699	-0.3725	0.437584	-0.2954	0.482341	-0.1103	0.15
Tb927.2.4140	Tb927.2.4140	1007	-0.3371	0.994489	-0.7502	0.213731	1506	-0.3527	0.217235	-0.2857	0.330233	-0.2431	0.000886
Tb927.2.4150	Tb927.2.4150	372	-0.0475	1	0.0154	0.988988	243	-0.0332	1	-0.3169	0.325092	-0.4408	3.51e-06
Tb927.2.4160	Tb927.2.4160	489	-0.2818	0.637406	-0.6651	0.00737352	#N/A	#N/A	#N/A	#N/A	#N/A	-0.3818	6.86e-06
Tb927.2.4200	Tb927.2.4200	441	2.8648	1.19091e-29	1.8634	3.20361e-09	#N/A	#N/A	#N/A	#N/A	#N/A	0.6505	2.43e-21
Tb927.2.4210	Tb927.2.4210	5046	-0.2573	0.954904	-0.3737	0.468131	3027	-0.3326	0.62883	-0.2531	0.599945	-0.1903	0.00443
Tb927.2.4230	Tb927.2.4230	727	-0.2161	1	-0.2569	0.791692	562	-0.2865	0.969382	0.1517	0.851099	-0.116	0.106
Tb927.2.4240	Tb927.2.4240	594	-0.1191	1	0.1777	0.819871	927	-0.1893	0.972946	-0.1217	0.818157	0.0154	0.911
Tb927.2.4280	Tb927.2.4280	663	1.892	2.00238e-16	1.3821	2.94964e-08	#N/A	#N/A	#N/A	#N/A	#N/A	0.0539	0.46
Tb927.2.4330	Tb927.2.4330	400	0.3419	0.839326	0.6358	0.205211	#N/A	#N/A	#N/A	#N/A	#N/A	0.1676	0.0256
Tb927.2.4340	Tb927.2.4340	388	0.0684	1	-0.1801	0.740231	87	0.2023	1	0.0046	1	0.2243	0.0541
Tb927.2.4370	Tb927.2.4370	851	-0.4708	0.92479	-0.6441	0.481652	1913	-0.4807	0.169684	-0.4097	0.243837	-0.0085	0.93
Tb927.2.4380	Tb927.2.4380	1041	-0.0474	1	-0.1414	0.643803	#N/A	#N/A	#N/A	#N/A	#N/A	0.224	0.0306
Tb927.2.4390	Tb927.2.4390	1540	-0.0204	1	-0.253	0.688637	165	-0.0272	1	-0.1014	0.912674	0.1687	0.0176
Tb927.2.4400	Tb927.2.4400	1430	-0.2067	1	-0.1942	0.734735	347	-0.3023	0.875168	-0.0519	0.953703	0.0275	0.773
Tb927.2.4410	Tb927.2.4410	493	0.125	1	0.0696	0.950183	1433	0.1006	1	0.2756	0.595964	0.2667	0.000479
Tb927.2.4420.1	Tb927.2.4420	1207	-0.1209	0.998419	-0.0168	0.973881	644	-0.1112	1	-0.1261	0.694662	0.101	0.359
Tb927.2.4420.2	Tb927.2.4420	1444	-0.1055	1	0.0199	0.967802	644	-0.1112	1	-0.1261	0.694662	0.101	0.359
Tb927.2.4440	Tb927.2.4440	468	-0.0454	1	0.3198	0.668075	422	0.0959	1	0.5189	0.229017	-0.4534	3.65e-06
Tb927.2.4445	Tb927.2.4445	948	0.1028	1	0.3307	0.694186	#N/A	#N/A	#N/A	#N/A	#N/A	-0.0166	0.892
Tb927.2.4460	Tb927.2.4460	701	0.1447	1	-0.3162	0.810608	25	0.1158	1	0.0862	0.968015	0.0402	0.685
Tb927.2.4470	Tb927.2.4470	847	0.1241	1	-0.1944	0.727436	405	0.0867	1	-0.2237	0.694321	0.1426	0.0955
Tb927.2.4480	Tb927.2.4480	493	-0.0985	1	-0.1326	0.873429	1021	-0.0276	1	0.0498	0.941782	0.1125	0.249
Tb927.2.4510	Tb927.2.4510	711	-0.1517	1	-0.4838	0.18419	1399	-0.0802	1	-0.2111	0.69143	0.2613	0.000187
Tb927.2.4520	Tb927.2.4520	1263	-0.026	1	-0.2882	0.614392	#N/A	#N/A	#N/A	#N/A	#N/A	-0.0863	0.289
Tb927.2.4530	Tb927.2.4530	600	-0.1632	1	-0.1439	0.844818	#N/A	#N/A	#N/A	#N/A	#N/A	-0.1674	0.101
Tb927.2.4540	Tb927.2.4540	953	-0.3541	0.12564	-0.1903	0.537561	1489	-0.3861	0.355755	-0.2518	0.557915	-0.2296	0.0317
Tb927.2.4550	Tb927.2.4550	2237	-0.3571	0.792301	-0.3658	0.532406	680	-0.3799	0.571582	-0.1639	0.791231	-0.5589	7.41e-11
Tb927.2.4560	Tb927.2.4560	629	-0.2671	0.932268	-0.422	0.387901	#N/A	#N/A	#N/A	#N/A	#N/A	-0.312	0.0023
Tb927.2.4580	Tb927.2.4580	563	-0.6066	0.412591	-0.9945	0.0293592	1990	-0.4992	0.425808	-0.5997	0.166682	-0.9688	1.69e-38
Tb927.2.4590	Tb927.2.4590	1199	0.165	1	-0.0596	0.920559	755	0.1815	0.992338	0.1407	0.781862	-0.1845	0.00591
Tb927.2.4610	Tb927.2.4610	814	0.0939	1	-0.0307	0.967958	1159	-0.0504	1	0.1049	0.889566	-0.1767	0.0185
Tb927.2.4620	Tb927.2.4620	405	-0.23	1	-0.1667	0.873361	498	-0.1429	1	0.1061	0.909674	0.0168	0.91
Tb927.2.4650	Tb927.2.4650	890	-0.1143	1	-0.1103	0.781649	658	-0.086	1	-0.1842	0.671081	0.0442	0.757
Tb927.2.4670	Tb927.2.4670	205	0.3725	0.979636	0.299	0.789477	89	0.3525	1	0.8339	0.49213	0.2427	0.0307
Tb927.2.4680	Tb927.2.4680	374	0.0835	1	0.1218	0.904844	72	-0.1297	1	-0.0229	0.987204	0.3843	0.000282
Tb927.2.4700	Tb927.2.4700	498	1.1775	0.0229593	1.1399	0.0237857	975	0.4888	0.743416	0.8837	0.0922738	0.5413	1.17e-07
Tb927.2.4710	Tb927.2.4710	2951	0.0701	1	0.9461	0.00288933	1924	-0.4331	0.623731	0.0827	0.924738	-0.4502	3.57e-08
Tb927.2.4720	Tb927.2.4720	511	0.1847	1	0.4013	0.385772	962	0.2849	0.934055	0.1176	0.880141	-0.5157	8.14e-10
Tb927.2.4740	Tb927.2.4740	1270	-0.1341	1	-0.4057	0.320743	#N/A	#N/A	#N/A	#N/A	#N/A	0.3035	0.00728
Tb927.2.4750	Tb927.2.4750	796	-0.0429	1	-0.3158	0.466648	338	-0.0844	1	-0.2303	0.694186	0.2288	0.107
Tb927.2.4760	Tb927.2.4760	594	-0.3831	0.849231	-0.5108	0.424204	593	-0.4376	0.110597	-0.667	0.00206664	-0.4173	3.06e-05
Tb927.2.4780	Tb927.2.4780	929	-0.0471	1	-0.2039	0.792783	965	-0.0788	1	-0.2691	0.561377	-0.0894	0.288
Tb927.2.4795	Tb927.2.4795	1229	0.0071	1	0.0197	0.97509	305	0.079	1	0.0986	0.828429	0.3435	0.000814
Tb927.2.4800	Tb927.2.4800	2884	0.0217	1	-0.2177	0.718703	513	-0.2471	1	-0.2532	0.748643	0.1943	0.0425
Tb927.2.4810	Tb927.2.4810	1472	0.1574	1	-0.056	0.95019	567	0.1939	1	0.0813	0.906387	-0.0969	0.167
Tb927.2.4830	Tb927.2.4830	1399	-0.2042	1	-0.6201	0.20024	2499	-0.2006	0.960237	-0.3776	0.281173	0.1431	0.0954
Tb927.2.4840	Tb927.2.4840	947	-0.1045	1	-0.2122	0.439457	#N/A	#N/A	#N/A	#N/A	#N/A	0.2545	0.0579
Tb927.2.4850	Tb927.2.4850	2133	-0.2122	0.783353	-0.1623	0.672537	3077	-0.1791	0.830787	-0.1638	0.612743	-0.1475	0.0756
Tb927.2.4870	Tb927.2.4870	892	0.1671	0.984261	-0.0315	0.95919	119	-0.0873	1	0.0826	0.932087	0.119	0.297
Tb927.2.4890	Tb927.2.4890	1265	-0.1269	1	-0.3276	0.429153	549	-0.0675	1	-0.3182	0.62339	0.1498	0.257
Tb927.2.4900	Tb927.2.4900	682	-0.0466	1	-0.2463	0.633784	353	-0.1631	1	-0.2237	0.759912	0.1542	0.308
Tb927.2.4920	Tb927.2.4920	469	-0.2287	1	-0.286	0.744788	406	-0.7266	0.027135	-1.1551	4.19859e-05	-0.2052	0.118
Tb927.2.4925	Tb927.2.4925	67	0.4485	0.875168	0.5571	0.528267	629	0.0268	1	-0.0149	0.985164	-0.2266	0.418
Tb927.2.4930	Tb927.2.4930	707	0.1855	1	-0.1261	0.870416	1027	0.1421	1	0.2258	0.57418	-0.0432	0.735
Tb927.2.4950	Tb927.2.4950	1753	-0.0694	1	-0.2416	0.745965	#N/A	#N/A	#N/A	#N/A	#N/A	0.0442	0.663
Tb927.2.4970	Tb927.2.4970	1466	-0.0269	1	-0.2579	0.67172	#N/A	#N/A	#N/A	#N/A	#N/A	0.0988	0.329
Tb927.2.4980	Tb927.2.4980	3685	-0.0105	1	-0.3501	0.430691	1864	-0.0738	1	-0.3464	0.517224	0.3675	0.000487
Tb927.2.4990	Tb927.2.4990	1774	0.0719	1	-0.1463	0.81366	301	0.0138	1	-0.0233	0.987204	0.1051	0.283
Tb927.2.5000	Tb927.2.5000	1538	0.0886	1	0.0186	0.982372	#N/A	#N/A	#N/A	#N/A	#N/A	-0.1552	0.102
Tb927.2.5010	Tb927.2.5010	1267	-0.0981	1	-0.3272	0.387227	#N/A	#N/A	#N/A	#N/A	#N/A	0.1548	0.0926
Tb927.2.5020	Tb927.2.5020	1862	-0.0233	1	-0.1568	0.663677	155	0.2695	0.9943	-0.0126	0.994622	0.0259	0.798
Tb927.2.5030	Tb927.2.5030	1900	-0.0093	1	-0.2262	0.708456	626	-0.005	1	-0.2509	0.766455	-0.0301	0.785
Tb927.2.5040	Tb927.2.5040	898	-0.027	1	0.0376	0.942271	425	0.0152	1	0.1208	0.827238	-0.0512	0.785
Tb927.2.5050	Tb927.2.5050	1016	0.0019	1	0.0006	1	402	-0.0882	1	-0.0696	0.908698	0.1754	0.0827
Tb927.2.5060	Tb927.2.5060	5141	-0.2192	1	-0.1393	0.868961	#N/A	#N/A	#N/A	#N/A	#N/A	-0.2799	0.000226
Tb927.2.5070	Tb927.2.5070	387	0.1751	1	0.5022	0.275612	42	-0.063	1	0.4867	0.55007	0.2929	0.0638
Tb927.2.5080	Tb927.2.5080	949	0.0187	1	-0.1157	0.806666	42	0.0351	1	-0.0073	1	0.3952	3.73e-05
Tb927.2.5120	Tb927.2.5120	675	-0.6806	0.0776541	-0.6176	0.104645	103	-0.6616	0.149573	-0.9401	0.00962336	-0.3927	0.00203
Tb927.2.5130	Tb927.2.5130	1739	-0.1009	1	-0.1716	0.568056	#N/A	#N/A	#N/A	#N/A	#N/A	0.1447	0.161
Tb927.2.5140	Tb927.2.5140	719	0.0985	1	0.2657	0.506919	476	-0.1003	1	0.2557	0.488366	0.1585	0.283
Tb927.2.5150	Tb927.2.5150	2066	-0.0345	1	-0.072	0.789303	#N/A	#N/A	#N/A	#N/A	#N/A	-0.0352	0.724
Tb927.2.5160	Tb927.2.5160	6797	0.1171	1	0.0867	0.851967	#N/A	#N/A	#N/A	#N/A	#N/A	0.1478	0.0421
Tb927.2.5180	Tb927.2.5180	2279	0.1861	0.895993	0.0024	1	194	0.2819	0.834488	0.1575	0.778784	0.0331	0.762
Tb927.2.5190	Tb927.2.5190	1617	-0.3633	0.667994	-0.3208	0.541605	769	-0.3139	0.619791	-0.2107	0.657121	0.3202	0.00488
Tb927.2.5200	Tb927.2.5200	1597	0.0324	1	-0.1567	0.750585	102	-0.0767	1	0.1149	0.909739	-0.0072	0.949
Tb927.2.5210	Tb927.2.5210	2387	0.1097	1	-0.0598	0.926074	#N/A	#N/A	#N/A	#N/A	#N/A	0.1419	0.156
Tb927.2.5220	Tb927.2.5220	1960	-0.3771	0.525932	-0.4902	0.167258	#N/A	#N/A	#N/A	#N/A	#N/A	-0.2913	0.000425
Tb927.2.5230	Tb927.2.5230	1383	0.0098	1	-0.1825	0.708983	#N/A	#N/A	#N/A	#N/A	#N/A	0.2827	0.00232
Tb927.2.5240	Tb927.2.5240	3252	-0.0816	1	-0.1949	0.679434	#N/A	#N/A	#N/A	#N/A	#N/A	0.0175	0.893
Tb927.2.5250	Tb927.2.5250	3617	0.0534	1	-0.0317	0.957734	499	-0.29	0.907191	-0.3114	0.583917	0.2573	0.00104
Tb927.2.5260	Tb927.2.5260	876	-0.0566	1	-0.1036	0.841421	817	-0.1134	1	-0.101	0.865499	-0.3116	0.00818
Tb927.2.5270	Tb927.2.5270	1939	-0.0668	1	-0.2679	0.756891	#N/A	#N/A	#N/A	#N/A	#N/A	-0.0744	0.292
Tb927.2.5280	Tb927.2.5280	2549	0.1075	1	0.2469	0.565674	321	0.2484	1	0.4125	0.505813	0.0018	0.987
Tb927.2.5290	Tb927.2.5290	139	-0.4994	0.908411	-1.3609	0.0512954	#N/A	#N/A	#N/A	#N/A	#N/A	-0.3229	0.0678
Tb927.2.5300	Tb927.2.5300	180	-0.6913	0.691514	-0.9668	0.281339	#N/A	#N/A	#N/A	#N/A	#N/A	-0.7455	1.51e-08
Tb927.2.5310	Tb927.2.5310	220	-1.1366	0.0946331	-1.785	0.00202549	81	-0.7525	0.108832	-1.1459	0.00487458	-1.1201	4.84e-20
Tb927.2.5320	Tb927.2.5320	107	-0.9603	0.192655	-1.2718	0.0592509	62	-0.6865	0.208335	-1.2525	0.00536998	-1.2931	9.34e-15
Tb927.2.5330	Tb927.2.5330	76	-1.2964	0.227203	-1.806	0.0499966	84	-0.7863	0.0876842	-1.2945	0.00238976	-1.0921	1.01e-08
Tb927.2.5340	Tb927.2.5340	81	-1.2803	0.157919	-1.0873	0.300301	64	-0.8616	0.0356664	-1.0012	0.0302607	-1.2053	5.53e-09
Tb927.2.5350	Tb927.2.5350	80	-1.0382	0.0795749	-1.2715	0.0476802	88	-0.8471	0.014106	-1.4498	7.19864e-05	-1.4089	8.79e-15
Tb927.2.5360	Tb927.2.5360	138	-1.0471	0.0522225	-0.9547	0.123723	#N/A	#N/A	#N/A	#N/A	#N/A	-0.9016	5.72e-11
Tb927.2.5384	Tb927.2.5384	19	0.3732	0.99408	0.7651	0.514284	#N/A	#N/A	#N/A	#N/A	#N/A	-1.5559	9.97e-25
Tb927.2.5410	Tb927.2.5410	1440	-0.1645	1	-0.2585	0.63619	482	-0.371	0.732567	-0.3546	0.524007	-0.3443	7.37e-06
Tb927.2.5440	Tb927.2.5440	663	0.4776	0.685828	0.0202	0.990681	901	0.3291	0.5027	0.1174	0.823399	0.2841	0.000217
Tb927.2.5480	Tb927.2.5480	507	0.2392	1	-0.0492	0.973347	459	0.2114	0.824113	0.0841	0.865973	0.0277	0.82
Tb927.2.5500	Tb927.2.5500	937	0.3177	0.619731	0.0188	0.982735	#N/A	#N/A	#N/A	#N/A	#N/A	0.4525	2.03e-07
Tb927.2.5530	Tb927.2.5530	546	0.456	0.832901	0.004	1	487	0.1871	1	0.3849	0.432754	0.1794	0.0295
Tb927.2.5540	Tb927.2.5540	570	0.2606	1	0.2172	0.83441	#N/A	#N/A	#N/A	#N/A	#N/A	0.291	1.06e-05
Tb927.2.5600	Tb927.2.5600	539	0.2546	1	0.1753	0.873468	315	0.1866	1	0.3109	0.627612	0.2801	4.54e-05
Tb927.2.5610	Tb927.2.5610	504	0.4081	0.894214	0.2504	0.800316	342	0.3709	0.561931	0.2015	0.723901	0.2367	0.00451
Tb927.2.5630	Tb927.2.5630	962	0.3106	0.714866	0.0448	0.952236	1708	0.3237	0.38718	0.168	0.682706	0.3906	2.77e-05
Tb927.2.5650	Tb927.2.5650	504	0.2532	1	0.1729	0.885363	687	0.1226	0.946034	0.1145	0.698301	-0.0374	0.766
Tb927.2.5660	Tb927.2.5660	795	-0.0016	1	-0.2814	0.426906	#N/A	#N/A	#N/A	#N/A	#N/A	-0.6302	1.01e-15
Tb927.2.5710	Tb927.2.5710	12	-0.2791	1	0.5879	0.661738	#N/A	#N/A	#N/A	#N/A	#N/A	1.6109	NA
Tb927.2.5720	Tb927.2.5720	4	0.6235	1	2.4771	0.315158	376	1.409	2.12482e-10	2.0226	6.94394e-19	-0.7378	0.0942
Tb927.2.5750	Tb927.2.5750	2186	0.0058	1	-0.0047	0.997436	#N/A	#N/A	#N/A	#N/A	#N/A	0.157	0.0761
Tb927.2.5760	Tb927.2.5760	341	1.0588	0.0238555	2.5493	4.53028e-11	#N/A	#N/A	#N/A	#N/A	#N/A	-0.4063	2.22e-10
Tb927.2.5800	Tb927.2.5800	1420	0.3722	0.144872	0.5346	0.00690355	286	-0.484	0.106664	-0.3047	0.418541	-0.1786	0.0344
Tb927.2.5810	Tb927.2.5810	2557	0.038	1	-0.5544	0.335971	1307	-0.079	1	-0.448	0.629204	-0.135	0.107
Tb927.2.5820	Tb927.2.5820	1829	-0.0468	1	-0.2472	0.701966	303	-0.0408	1	-0.1234	0.897342	-0.196	0.0206
Tb927.2.5830	Tb927.2.5830	2431	-0.1663	1	-0.539	0.379344	#N/A	#N/A	#N/A	#N/A	#N/A	-0.0288	0.842
Tb927.2.5850	Tb927.2.5850	1735	-0.18	0.940837	-0.2089	0.582805	#N/A	#N/A	#N/A	#N/A	#N/A	-0.2319	0.0134
Tb927.2.5860	Tb927.2.5860	102	0.7114	0.183265	0.2523	0.817104	#N/A	#N/A	#N/A	#N/A	#N/A	0.1974	0.0186
Tb927.2.5870	Tb927.2.5870	430	0.7961	0.896002	2.2417	0.0183875	176	0.3725	1	2.1865	1.64482e-05	0.1179	0.124
Tb927.2.5890	Tb927.2.5890	978	-0.1049	1	-0.3249	0.457433	319	-0.1321	1	-0.1132	0.813338	-0.0194	0.874
Tb927.2.5900	Tb927.2.5900	1374	-0.0922	1	-0.3081	0.542157	113	-0.2636	1	-0.2106	0.825732	-0.1534	0.0574
Tb927.2.5910	Tb927.2.5910	21962	-0.3436	0.215088	-0.2859	0.299008	6493	-0.3304	0.400146	-0.228	0.548617	-0.0999	0.159
Tb927.2.5930	Tb927.2.5930	2552	-0.1449	0.918188	-0.1852	0.509264	#N/A	#N/A	#N/A	#N/A	#N/A	-0.0443	0.655
Tb927.2.5950	Tb927.2.5950	1150	0.0235	1	-0.1085	0.75877	361	-0.0697	1	0.0504	0.957734	-0.1091	0.193
Tb927.2.5970	Tb927.2.5970	1426	-0.0022	1	0.132	0.834554	701	-0.1846	1	-0.1354	0.841421	0.2399	0.0018
Tb927.2.5980	Tb927.2.5980	1822	0.2838	0.822852	-0.0123	0.992883	356	0.1001	1	0.2253	0.763908	0.7347	2.71e-26
Tb927.2.6000	Tb927.2.6000	195	0.6355	0.52761	0.8823	0.146093	403	0.1861	1	0.1629	0.880095	-0.5036	2.59e-14
Tb927.2.6050	Tb927.2.6050	1827	-0.0032	1	0.0151	0.989973	#N/A	#N/A	#N/A	#N/A	#N/A	-0.0155	0.874
Tb927.2.6070	Tb927.2.6070	2583	0.0313	1	-0.0457	0.925744	818	0.023	1	-0.0216	0.982892	0.1858	0.0352
Tb927.2.6080	Tb927.2.6080	961	-0.0472	1	0.0861	0.89417	125	-0.1615	1	0.3044	0.502086	0.0423	0.7
Tb927.2.6090	Tb927.2.6090	12636	-0.2279	0.886639	-0.1808	0.706315	10213	-0.2951	0.827316	-0.1116	0.868961	-0.0295	0.735
Tb927.2.6100	Tb927.2.6100	893	0.3279	0.972805	0.4817	0.486515	243	0.3165	1	0.5147	0.568871	-0.0487	0.614
Tb927.2.6130	Tb927.2.6130	1102	0.103	1	0.2611	0.776689	127	0.0973	1	0.4595	0.315158	0.0171	0.867
Tb927.2.6150	Tb927.2.6150	56	0.8736	0.369703	0.5706	0.802325	#N/A	#N/A	#N/A	#N/A	#N/A	-1.2228	1.98e-49
Tb927.2.6180	Tb927.2.6180	7	0.1516	1	0.2854	0.924464	20	-1.3512	0.0513752	-1.1613	0.289075	-0.8282	4.14e-11
Tb927.2.6200	Tb927.2.6200	15	0.9403	0.637406	0.4902	0.879969	#N/A	#N/A	#N/A	#N/A	#N/A	-1.8822	9.05e-61
Tb927.2.6210	Tb927.2.6210	3	0.1019	1	1.6999	0.705613	35	-2.1821	5.69412e-06	-1.7874	0.0441492	-0.7329	3.32e-06
Tb927.2.6220	Tb927.2.6220	7	0.4918	1	2.0526	0.550597	0	-0.1824	NA	0	NA	-2.5635	4.44e-107
Tb927.2.6230	Tb927.2.6230	0	#VALUE!	NA	#VALUE!	NA	#N/A	#N/A	#N/A	#N/A	#N/A	-1.4377	0.114
Tb927.2.6240	Tb927.2.6240	6	0.5552	1	1.6944	0.693377	1	-1.1326	1	-2.1928	0.650465	-1.7085	9.64e-19
Tb927.2.6270	Tb927.2.6270	0	#VALUE!	NA	#VALUE!	NA	#N/A	#N/A	#N/A	#N/A	#N/A	-0.7988	0.453
Tb927.2.6280	Tb927.2.6280	5	0.6086	1	0.7342	0.883359	1	-0.1474	1	-1.0606	0.874907	-1.5008	4.21e-13
Tb927.2.6310	Tb927.2.6310	0	#VALUE!	NA	#VALUE!	NA	8	-1.2644	0.337002	-1.8431	0.247585	-1.1165	0.578
Tb927.2.6320	Tb927.2.6320	2	-0.5475	1	0.4325	0.93727	10	1.1437	0.956936	-0.3061	0.937865	-3.8383	2.44e-125
Tb927.2.6350	Tb927.2.6350	3	0.0205	1	2.2866	0.601129	#N/A	#N/A	#N/A	#N/A	#N/A	-0.2864	0.407
Tb927.2.6372	Tb927.2.6372	0	-1.0489	1	-1.123	0.934897	1	-0.5313	1	0	1	0.9916	NA
Tb927.2.6375	Tb927.2.6375	0	#VALUE!	NA	#VALUE!	NA	#N/A	#N/A	#N/A	#N/A	#N/A	0.649	NA
Tb927.2.6380	Tb927.2.6380	0	-1.6641	1	-1.123	0.911014	#N/A	#N/A	#N/A	#N/A	#N/A	0	0
Tb927.2.6390	Tb927.2.6390	0	#VALUE!	NA	#VALUE!	NA	#N/A	#N/A	#N/A	#N/A	#N/A	0	0
Tb927.2.6400	Tb927.2.6400	0	#VALUE!	NA	#VALUE!	NA	#N/A	#N/A	#N/A	#N/A	#N/A	-0.0438	0.979
Tb927.2.6404	Tb927.2.6404	0	#VALUE!	NA	#VALUE!	NA	#N/A	#N/A	#N/A	#N/A	#N/A	-0.7654	NA
Tb927.2.6410	Tb927.2.6410	0	#VALUE!	NA	#VALUE!	NA	#N/A	#N/A	#N/A	#N/A	#N/A	0	0
Tb927.2.6430	Tb927.2.6430	0	-1.1442	NA	0	NA	#N/A	#N/A	#N/A	#N/A	#N/A	0.649	NA
Tb927.2.6435	Tb927.2.6435	0	0.6936	NA	0	NA	0	2.0562	1	-1.123	0.90712	0.649	NA
Tb927.3.100	Tb927.3.100	0	0.7793	NA	0	NA	#N/A	#N/A	#N/A	#N/A	#N/A	-1.3564	NA
Tb927.3.110	Tb927.3.110	0	0.6168	NA	0	NA	#N/A	#N/A	#N/A	#N/A	#N/A	-1.674	NA
Tb927.3.120	Tb927.3.120	0	#VALUE!	NA	#VALUE!	NA	#N/A	#N/A	#N/A	#N/A	#N/A	0	0
Tb927.3.130	Tb927.3.130	0	-1.1442	NA	0	NA	#N/A	#N/A	#N/A	#N/A	#N/A	0	0
Tb927.3.140	Tb927.3.140	0	#VALUE!	NA	#VALUE!	NA	#N/A	#N/A	#N/A	#N/A	#N/A	0	0
Tb927.3.150	Tb927.3.150	0	0.7793	NA	0	NA	#N/A	#N/A	#N/A	#N/A	#N/A	0	0
Tb927.3.160	Tb927.3.160	0	-0.1824	NA	0	NA	#N/A	#N/A	#N/A	#N/A	#N/A	-0.4326	0.437
Tb927.3.170	Tb927.3.170	0	#VALUE!	NA	#VALUE!	NA	0	#VALUE!	NA	#VALUE!	NA	0	0
Tb927.3.180	Tb927.3.180	1	1.1607	1	-0.1612	0.989973	#N/A	#N/A	#N/A	#N/A	#N/A	0.2965	NA
Tb927.3.190	Tb927.3.190	0	0	NA	-1.123	NA	#N/A	#N/A	#N/A	#N/A	#N/A	-1.3729	NA
Tb927.3.200	Tb927.3.200	0	-0.1824	NA	0	NA	0	0.7793	NA	0	NA	-0.2781	NA
Tb927.3.210	Tb927.3.210	0	#VALUE!	NA	#VALUE!	NA	#N/A	#N/A	#N/A	#N/A	#N/A	-1.674	NA
Tb927.3.220	Tb927.3.220	0	#VALUE!	NA	#VALUE!	NA	0	#VALUE!	NA	#VALUE!	NA	0	0
Tb927.3.230	Tb927.3.230	0	#VALUE!	NA	#VALUE!	NA	0	#VALUE!	NA	#VALUE!	NA	0.649	NA
Tb927.3.240	Tb927.3.240	0	0	NA	-0.1612	NA	0	#VALUE!	NA	#VALUE!	NA	1.8348	NA
Tb927.3.250	Tb927.3.250	0	1.7241	NA	0	NA	0	#VALUE!	NA	#VALUE!	NA	-0.7482	0.345
Tb927.3.260	Tb927.3.260	0	0.7793	NA	0	NA	0	#VALUE!	NA	#VALUE!	NA	0	0
Tb927.3.270	Tb927.3.270	0	0.7623	NA	0	NA	0	#VALUE!	NA	#VALUE!	NA	0.649	NA
Tb927.3.280	Tb927.3.280	0	-0.1824	1	1.7008	0.897342	0	0	NA	1.7008	NA	-1.1512	NA
Tb927.3.290	Tb927.3.290	0	0.7793	NA	0	NA	#N/A	#N/A	#N/A	#N/A	#N/A	-1.3045	0.557
Tb927.3.300	Tb927.3.300	0	#VALUE!	NA	#VALUE!	NA	#N/A	#N/A	#N/A	#N/A	#N/A	0	0
Tb927.3.310	Tb927.3.310	0	-1.1442	NA	0.8005	NA	0	#VALUE!	NA	#VALUE!	NA	-0.2457	NA
Tb927.3.320	Tb927.3.320	0	-1.1442	NA	0	NA	#N/A	#N/A	#N/A	#N/A	#N/A	0	0
Tb927.3.330	Tb927.3.330	0	0	NA	0.8006	NA	0	#VALUE!	NA	#VALUE!	NA	0.649	NA
Tb927.3.340	Tb927.3.340	0	0	NA	-1.123	NA	#N/A	#N/A	#N/A	#N/A	#N/A	0	0
Tb927.3.350	Tb927.3.350	0	-1.1442	NA	0	NA	0	0.7793	NA	0	NA	-2.0232	NA
Tb927.3.360	Tb927.3.360	0	#VALUE!	NA	#VALUE!	NA	#N/A	#N/A	#N/A	#N/A	#N/A	-1.1512	NA
Tb927.3.370	Tb927.3.370	0	2.7268	1	1.7008	0.897342	#N/A	#N/A	#N/A	#N/A	#N/A	0.8173	NA
Tb927.3.380	Tb927.3.380	0	0	NA	0.8006	NA	0	#VALUE!	NA	#VALUE!	NA	0	0
Tb927.3.390	Tb927.3.390	0	1.7241	NA	0	NA	#N/A	#N/A	#N/A	#N/A	#N/A	-0.2457	NA
Tb927.3.400	Tb927.3.400	0	0.7793	1	0.7451	0.956201	0	#VALUE!	NA	#VALUE!	NA	1.1806	NA
Tb927.3.410	Tb927.3.410	0	#VALUE!	NA	#VALUE!	NA	#N/A	#N/A	#N/A	#N/A	#N/A	-0.4255	NA
Tb927.3.420	Tb927.3.420	0	0.7793	NA	-1.123	NA	0	#VALUE!	NA	#VALUE!	NA	-1.1512	NA
Tb927.3.430	Tb927.3.430	0	#VALUE!	NA	#VALUE!	NA	0	#VALUE!	NA	#VALUE!	NA	-0.3346	0.765
Tb927.3.440	Tb927.3.440	0	-0.1824	1	0.8005	0.95919	#N/A	#N/A	#N/A	#N/A	#N/A	0.8157	NA
Tb927.3.450	Tb927.3.450	0	0.7793	1	-2.353	0.851099	#N/A	#N/A	#N/A	#N/A	#N/A	0	0
Tb927.3.460	Tb927.3.460	0	1.7291	NA	0	NA	0	#VALUE!	NA	#VALUE!	NA	-0.1585	0.859
Tb927.3.470	Tb927.3.470	0	#VALUE!	NA	#VALUE!	NA	#N/A	#N/A	#N/A	#N/A	#N/A	0	0
Tb927.3.480	Tb927.3.480	0	0.7623	NA	0	NA	0	0.7793	NA	0	NA	-0.8967	0.000671
Tb927.3.490	Tb927.3.490	0	0.7793	NA	0	NA	#N/A	#N/A	#N/A	#N/A	#N/A	-1.3564	NA
Tb927.3.500	Tb927.3.500	0	#VALUE!	NA	#VALUE!	NA	0	0.7793	NA	0	NA	0	0
Tb927.3.510	Tb927.3.510	9	0.8963	0.987067	0.1469	0.963467	1	2.0558	1	0.7332	0.92487	-0.4122	0.367
Tb927.3.520	Tb927.3.520	3	-0.0668	1	-1.8859	0.653487	#N/A	#N/A	#N/A	#N/A	#N/A	-0.1261	0.42
Tb927.3.530	Tb927.3.530	0	0.7793	NA	0	NA	#N/A	#N/A	#N/A	#N/A	#N/A	-3.2408	0.00264
Tb927.3.540	Tb927.3.540	0	-1.1442	NA	0	NA	#N/A	#N/A	#N/A	#N/A	#N/A	-1.3529	NA
Tb927.3.550	Tb927.3.550	0	0.4192	1	0	1	#N/A	#N/A	#N/A	#N/A	#N/A	-0.4629	0.0929
Tb927.3.560	Tb927.3.560	1	-0.1459	1	0	1	#N/A	#N/A	#N/A	#N/A	#N/A	-0.1674	0.143
Tb927.3.570	Tb927.3.570	2	-1.1877	0.994489	-0.0947	0.993318	#N/A	#N/A	#N/A	#N/A	#N/A	-0.5552	2.01e-05
Tb927.3.580.1	Tb927.3.580	37	-0.5853	0.97518	-0.3197	0.868961	#N/A	#N/A	#N/A	#N/A	#N/A	-0.1474	0.178
Tb927.3.580.2	Tb927.3.580	44	-0.4478	1	-0.2756	0.863113	#N/A	#N/A	#N/A	#N/A	#N/A	-0.1474	0.178
Tb927.3.585	Tb927.3.585	432	-0.183	1	-0.3076	0.735855	#N/A	#N/A	#N/A	#N/A	#N/A	0.0781	0.544
Tb927.3.590	Tb927.3.590	311	-0.3068	0.994397	-0.5294	0.430335	#N/A	#N/A	#N/A	#N/A	#N/A	0.5884	0.000937
Tb927.3.600	Tb927.3.600	56	-1.0303	0.214666	-0.9477	0.284488	114	-0.442	0.500039	-0.3314	0.57418	0.1971	0.166
Tb927.3.610	Tb927.3.610	158	0.3403	1	0.8191	0.328847	#N/A	#N/A	#N/A	#N/A	#N/A	0.2066	0.0736
Tb927.3.620	Tb927.3.620	747	-0.2168	1	-0.1275	0.880141	151	-0.147	1	-0.035	0.974324	-0.1492	0.0767
Tb927.3.630	Tb927.3.630	372	0.2655	1	0.9414	0.156955	260	0.2643	1	0.9096	0.123665	0.6345	4.87e-07
Tb927.3.640	Tb927.3.640	2864	-0.0523	1	-0.0425	0.956453	653	-0.0994	1	-0.0125	0.987569	0.2169	0.00424
Tb927.3.650	Tb927.3.650	95	0.2892	1	0.3413	0.714998	122	0.2598	1	0.5535	0.33369	0.1199	0.643
Tb927.3.660	Tb927.3.660	535	-0.0592	1	-0.2913	0.542992	#N/A	#N/A	#N/A	#N/A	#N/A	0.1755	0.286
Tb927.3.670	Tb927.3.670	518	0.0194	1	-0.1263	0.830822	#N/A	#N/A	#N/A	#N/A	#N/A	0.0681	0.589
Tb927.3.680	Tb927.3.680	717	-0.3731	0.462217	-0.4332	0.230364	#N/A	#N/A	#N/A	#N/A	#N/A	-0.1214	0.272
Tb927.3.690	Tb927.3.690	1205	0.2056	0.998401	0.3569	0.418578	500	0.297	0.594681	0.4108	0.177153	0.1604	0.0482
Tb927.3.700	Tb927.3.700	695	-0.8539	0.238041	-0.762	0.265279	#N/A	#N/A	#N/A	#N/A	#N/A	0.1224	0.517
Tb927.3.710	Tb927.3.710	819	-0.1652	1	-0.0376	0.95851	78	-0.4049	0.781542	0.3205	0.66403	0.0584	0.575
Tb927.3.720	Tb927.3.720	1888	0.0889	1	0.4545	0.670331	1202	0.0169	1	0.4827	0.606761	0.0599	0.491
Tb927.3.730	Tb927.3.730	400	0.2766	1	0.387	0.674439	568	0.1348	1	0.7018	0.329248	0.3168	0.00027
Tb927.3.740	Tb927.3.740	807	0.0511	1	0.0671	0.961035	#N/A	#N/A	#N/A	#N/A	#N/A	0.0478	0.653
Tb927.3.750	Tb927.3.750	765	-0.1558	1	-0.2056	0.61758	436	-0.0276	1	-0.1056	0.889314	0.3788	0.00153
Tb927.3.760	Tb927.3.760	929	-0.0349	1	-0.2844	0.499153	#N/A	#N/A	#N/A	#N/A	#N/A	0.0193	0.866
Tb927.3.770	Tb927.3.770	1811	0.0306	1	-0.0573	0.904929	923	0.0817	1	-0.0515	0.942391	0.2158	0.04
Tb927.3.780	Tb927.3.780	2505	-0.1004	1	-0.1007	0.792285	#N/A	#N/A	#N/A	#N/A	#N/A	-0.1118	0.179
Tb927.3.790	Tb927.3.790	1008	-0.0854	1	-0.0632	0.851086	65	-0.2711	1	0.0753	0.93727	0.0935	0.434
Tb927.3.800	Tb927.3.800	1301	-0.0072	1	-0.1771	0.792506	2281	0.092	1	0.0077	0.992883	0.204	0.0321
Tb927.3.810	Tb927.3.810	1268	-0.1087	1	-0.2547	0.441822	#N/A	#N/A	#N/A	#N/A	#N/A	0.2692	0.0139
Tb927.3.820	Tb927.3.820	1021	0.1876	0.802081	0.2243	0.431245	#N/A	#N/A	#N/A	#N/A	#N/A	0.2267	0.0601
Tb927.3.830	Tb927.3.830	1807	-0.1429	1	-0.3078	0.302594	#N/A	#N/A	#N/A	#N/A	#N/A	0.0234	0.854
Tb927.3.840	Tb927.3.840	646	-0.0318	1	-0.1928	0.734846	541	0.2664	0.810321	0.2861	0.514453	0.0288	0.827
Tb927.3.850	Tb927.3.850	214	0.9114	0.210787	0.7887	0.364831	#N/A	#N/A	#N/A	#N/A	#N/A	0.45	3.99e-08
Tb927.3.860	Tb927.3.860	3405	0.1253	1	0.2239	0.725441	3951	0.0866	1	0.2201	0.701222	0.1948	0.0795
Tb927.3.870	Tb927.3.870	1009	0.2364	0.972215	0.523	0.177436	52	0.2012	1	0.8556	0.139125	-0.166	0.0504
Tb927.3.880	Tb927.3.880	977	0.0355	1	-0.0584	0.940838	#N/A	#N/A	#N/A	#N/A	#N/A	0.152	0.0986
Tb927.3.890	Tb927.3.890	926	0.1506	1	0.2785	0.426906	#N/A	#N/A	#N/A	#N/A	#N/A	0.2126	0.0367
Tb927.3.900	Tb927.3.900	1205	0.1152	1	0.1718	0.618785	75	0.1546	1	0.4216	0.543458	0.3332	0.000308
Tb927.3.910	Tb927.3.910	1055	-0.0272	1	-0.2089	0.706315	#N/A	#N/A	#N/A	#N/A	#N/A	0.167	0.0708
Tb927.3.920	Tb927.3.920	1381	0.1115	1	-0.1897	0.771966	223	-0.0606	1	0.0918	0.937194	0.21	0.00628
Tb927.3.930	Tb927.3.930	2525	0.1352	1	-0.0789	0.955913	1098	0.0311	1	0.083	0.917409	-0.186	0.00247
Tb927.3.940	Tb927.3.940	1394	-0.2312	0.459169	-0.2008	0.434383	489	-0.3119	0.464698	-0.211	0.582118	0.4977	1.25e-05
Tb927.3.945	Tb927.3.945	191	0.3328	0.998419	0.2408	0.813281	566	0.2548	0.850217	0.1991	0.701395	0.3001	0.0256
Tb927.3.950	Tb927.3.950	461	0.2023	1	-0.1542	0.886272	843	0.1802	0.870225	0.2164	0.51272	-0.0395	0.718
Tb927.3.960	Tb927.3.960	751	0.0624	1	0.1499	0.868464	1676	0.0447	1	0.2223	0.724637	-0.1136	0.233
Tb927.3.970	Tb927.3.970	3884	-0.1557	1	-0.3933	0.450999	740	-0.1207	1	-0.359	0.647561	0.072	0.476
Tb927.3.980	Tb927.3.980	814	-0.0443	1	-0.2845	0.513504	#N/A	#N/A	#N/A	#N/A	#N/A	-0.0314	0.744
Tb927.3.990	Tb927.3.990	872	0.2531	1	0.2456	0.752627	383	0.3035	0.92479	0.4196	0.473462	0.2449	0.00818
Tb927.3.1000	Tb927.3.1000	736	-0.0107	1	0.0587	0.922552	#N/A	#N/A	#N/A	#N/A	#N/A	0.2027	0.153
Tb927.3.1010	Tb927.3.1010	2047	0.4498	0.0787468	0.5451	0.0142467	865	0.4688	0.297462	0.7621	0.0125738	0.3523	1.99e-06
Tb927.3.1020	Tb927.3.1020	733	0.2348	0.972215	0.1586	0.806871	#N/A	#N/A	#N/A	#N/A	#N/A	0.0889	0.335
Tb927.3.1030	Tb927.3.1030	1513	-0.1009	1	0.0738	0.927126	988	-0.0985	1	0.1114	0.897692	-0.2009	0.0254
Tb927.3.1050	Tb927.3.1050	0	#VALUE!	NA	#VALUE!	NA	#N/A	#N/A	#N/A	#N/A	#N/A	-1.4503	NA
Tb927.3.1060	Tb927.3.1060	1042	0.0628	1	0.0131	0.992675	#N/A	#N/A	#N/A	#N/A	#N/A	-0.0103	0.912
Tb927.3.1070	Tb927.3.1070	1323	-0.0381	1	-0.0072	0.993897	26	-0.4581	0.93723	-0.3564	0.747678	0.3506	7.47e-06
Tb927.3.1080	Tb927.3.1080	2219	0.048	1	0.0057	0.997933	881	0.0927	1	0.0226	0.977283	0.4615	1.65e-09
Tb927.3.1085	Tb927.3.1085	422	-0.0914	1	-0.1861	0.591587	432	-0.0462	1	-0.0544	0.889704	0.005	0.981
Tb927.3.1090	Tb927.3.1090	478	-0.3136	0.705931	-0.3781	0.371871	1072	-0.2455	0.639658	-0.363	0.147979	-0.0668	0.674
Tb927.3.1100	Tb927.3.1100	654	-0.1045	1	-0.1465	0.628661	#N/A	#N/A	#N/A	#N/A	#N/A	0.1096	0.4
Tb927.3.1110	Tb927.3.1110	683	0.021	1	-0.1704	0.872119	1433	0.051	1	0.3271	0.587825	0.0988	0.358
Tb927.3.1120	Tb927.3.1120	5681	-0.0184	1	0.4051	0.539388	1011	-0.0339	1	0.2743	0.747221	-0.128	0.0578
Tb927.3.1130	Tb927.3.1130	1317	0.1149	1	-0.0082	0.997204	667	-0.0101	1	0.0432	0.964207	0.2152	0.0089
Tb927.3.1140	Tb927.3.1140	1366	0.0182	1	-0.1535	0.673285	636	-0.0697	1	-0.1615	0.616911	0.0264	0.822
Tb927.3.1150	Tb927.3.1150	1919	0.0345	1	-0.0237	0.975835	227	0.0386	1	-0.1571	0.84282	0.0021	0.988
Tb927.3.1160	Tb927.3.1160	1196	-0.1237	1	-0.1592	0.700493	#N/A	#N/A	#N/A	#N/A	#N/A	0.1572	0.211
Tb927.3.1170	Tb927.3.1170	977	-0.0291	1	-0.2709	0.504615	#N/A	#N/A	#N/A	#N/A	#N/A	0.0248	0.836
Tb927.3.1180	Tb927.3.1180	1088	-0.0354	1	-0.331	0.551841	549	0.0335	1	0.0092	0.993319	0.1792	0.0214
Tb927.3.1190	Tb927.3.1190	1375	-0.0016	1	-0.0926	0.922735	389	0.0088	1	0.195	0.766228	0.0222	0.785
Tb927.3.1200.1	Tb927.3.1200	552	0.1432	1	0.3124	0.50536	1442	0.0942	1	0.0346	0.914433	0.0121	0.925
Tb927.3.1200.2	Tb927.3.1200	1025	0.1344	1	0.2256	0.711195	1442	0.0942	1	0.0346	0.914433	0.0121	0.925
Tb927.3.1210	Tb927.3.1210	1239	0.062	1	-0.2161	0.810608	890	-0.0182	1	-0.0795	0.897342	0.0499	0.581
Tb927.3.1220	Tb927.3.1220	983	0.1038	1	-0.0867	0.89916	119	-0.0974	1	0.0191	0.989685	0.4449	5.93e-06
Tb927.3.1230	Tb927.3.1230	1795	0.0268	1	-0.2089	0.654596	#N/A	#N/A	#N/A	#N/A	#N/A	0.2174	0.00438
Tb927.3.1240	Tb927.3.1240	1122	0.1033	1	0.1036	0.863604	#N/A	#N/A	#N/A	#N/A	#N/A	0.3573	0.000123
Tb927.3.1250	Tb927.3.1250	685	0.0015	1	-0.0973	0.800578	1845	-0.1398	1	-0.09	0.857387	0.2194	0.0886
Tb927.3.1260	Tb927.3.1260	940	-0.0257	1	0.1009	0.876928	#N/A	#N/A	#N/A	#N/A	#N/A	0.0945	0.422
Tb927.3.1270	Tb927.3.1270	1591	-0.0094	1	-0.0519	0.896684	153	-0.152	1	0.0204	0.983593	0.1678	0.0729
Tb927.3.1280	Tb927.3.1280	1110	0.1583	0.962915	0.1088	0.798504	265	0.0794	1	0.1055	0.798504	0.0425	0.697
Tb927.3.1290	Tb927.3.1290	2683	0.0007	1	-0.1984	0.743502	524	-0.0819	1	-0.0872	0.93213	0.1559	0.0384
Tb927.3.1300	Tb927.3.1300	453	-0.3554	0.998401	-0.4534	0.612554	686	-0.2789	0.936074	-0.214	0.752333	-0.1615	0.15
Tb927.3.1310.1	Tb927.3.1310	770	-0.2342	0.968169	-0.8242	0.00628666	#N/A	#N/A	#N/A	#N/A	#N/A	0.1761	0.0104
Tb927.3.1310.2	Tb927.3.1310	802	-0.2409	0.956936	-0.8311	0.00652947	#N/A	#N/A	#N/A	#N/A	#N/A	0.1761	0.0104
Tb927.3.1320	Tb927.3.1320	2043	0.0319	1	-0.072	0.924914	#N/A	#N/A	#N/A	#N/A	#N/A	0.179	0.00914
Tb927.3.1330	Tb927.3.1330	1566	0.0857	1	-0.1492	0.848604	201	0.124	1	0.0901	0.924464	0.2607	0.00105
Tb927.3.1340	Tb927.3.1340	2664	0.0392	1	-0.0273	0.967547	#N/A	#N/A	#N/A	#N/A	#N/A	0.1555	0.0563
Tb927.3.1350	Tb927.3.1350	1122	-0.3916	0.949242	-0.5843	0.44338	808	-0.4734	0.727857	-0.579	0.360882	-0.3088	6.07e-05
Tb927.3.1360	Tb927.3.1360	1438	-0.0622	1	-0.216	0.702166	#N/A	#N/A	#N/A	#N/A	#N/A	0.0401	0.693
Tb927.3.1370	Tb927.3.1370	27152	-0.25	0.864399	-0.1502	0.784836	17470	-0.2976	0.850217	-0.1299	0.851086	-0.0237	0.835
Tb927.3.1380	Tb927.3.1380	10282	-0.1759	1	-0.2982	0.645733	18062	-0.1976	0.969048	-0.1158	0.832645	0.4245	2.16e-11
Tb927.3.1390	Tb927.3.1390	861	0.1214	1	-0.0732	0.919557	640	0.1326	1	0.0738	0.880691	0.103	0.266
Tb927.3.1400	Tb927.3.1400	726	0.0601	1	-0.0001	1	321	0.0252	1	0.2633	0.606645	0.0153	0.906
Tb927.3.1410	Tb927.3.1410	3967	-0.026	1	0.1364	0.858685	2095	-0.0487	1	0.2394	0.716785	0.5947	3.11e-13
Tb927.3.1420	Tb927.3.1420	1619	0.0613	1	0.0769	0.93727	164	0.1969	1	0.3939	0.631782	0.1483	0.0234
Tb927.3.1430	Tb927.3.1430	750	-0.0291	1	-0.0135	0.982372	187	0.1179	1	0.2516	0.663397	0.2362	0.0257
Tb927.3.1440	Tb927.3.1440	1441	0.0626	1	-0.1635	0.809851	436	0.0588	1	-0.0954	0.840683	0.1215	0.118
Tb927.3.1450	Tb927.3.1450	528	-0.0044	1	-0.1547	0.792783	#N/A	#N/A	#N/A	#N/A	#N/A	0.1527	0.19
Tb927.3.1460	Tb927.3.1460	71	-0.0768	1	-0.1009	0.962868	157	-0.2643	1	0.7871	0.466404	-0.0633	0.686
Tb927.3.1470	Tb927.3.1470	2	0.5994	1	-1.1249	0.836984	#N/A	#N/A	#N/A	#N/A	#N/A	-1.7039	8.44e-75
Tb927.3.1480	Tb927.3.1480	2	-0.9134	1	-1.5148	0.759868	#N/A	#N/A	#N/A	#N/A	#N/A	-0.7826	5.41e-07
Tb927.3.1490	Tb927.3.1490	5	0.1315	1	-0.6585	0.801193	11	-0.178	1	-0.7207	0.715542	-1.2759	7.39e-28
Tb927.3.1500	Tb927.3.1500	3	-0.4188	1	-0.646	0.893298	#N/A	#N/A	#N/A	#N/A	#N/A	0.7894	7.27e-17
Tb927.3.1510	Tb927.3.1510	2	-1.5365	0.974859	-3.4034	0.341947	1	-0.1092	1	-1.745	0.778846	0.7801	8.2e-12
Tb927.3.1520	Tb927.3.1520	2	0.2305	1	1.6923	0.741599	#N/A	#N/A	#N/A	#N/A	#N/A	-1.7711	7.44e-71
Tb927.3.1525	Tb927.3.1525	85	-0.1358	1	-0.1024	0.958195	#N/A	#N/A	#N/A	#N/A	#N/A	-0.0714	0.618
Tb927.3.1530	Tb927.3.1530	636	-0.0978	1	-0.2949	0.599904	192	-0.1223	1	-0.1393	0.81366	0.36	0.000469
Tb927.3.1540	Tb927.3.1540	423	0.133	1	0.1521	0.746748	266	0.2173	0.890874	0.0638	0.908698	0.2178	0.0886
Tb927.3.1550	Tb927.3.1550	719	0.2605	0.906825	-0.0611	0.937011	765	-0.0919	1	0.0061	0.995424	-0.1359	0.0673
Tb927.3.1560	Tb927.3.1560	636	0.2174	0.993384	0.1142	0.866257	433	0.1822	1	0.2809	0.562901	0.1119	0.286
Tb927.3.1570	Tb927.3.1570	244	0.4673	0.847966	0.4131	0.689382	223	0.4118	0.748938	0.5322	0.371871	0.3533	1.07e-06
Tb927.3.1580	Tb927.3.1580	1522	0.0629	1	-0.0259	0.961035	#N/A	#N/A	#N/A	#N/A	#N/A	0.114	0.194
Tb927.3.1590	Tb927.3.1590	2216	-0.0993	1	-0.3201	0.586013	#N/A	#N/A	#N/A	#N/A	#N/A	-0.148	0.0461
Tb927.3.1600	Tb927.3.1600	677	-0.1193	1	0.0097	0.997243	#N/A	#N/A	#N/A	#N/A	#N/A	0.2563	0.0516
Tb927.3.1610	Tb927.3.1610	724	0.7588	0.339184	1.6163	0.000494026	#N/A	#N/A	#N/A	#N/A	#N/A	-0.043	0.67
Tb927.3.1620	Tb927.3.1620	1606	0.1829	1	0.1655	0.824163	#N/A	#N/A	#N/A	#N/A	#N/A	0.3009	1.23e-06
Tb927.3.1630	Tb927.3.1630	93	2.8022	3.07706e-17	3.3929	1.34875e-12	621	1.6259	0.000528387	1.2545	0.0122617	0.007	0.954
Tb927.3.1640	Tb927.3.1640	50	1.25	0.0171498	1.846	0.00845068	#N/A	#N/A	#N/A	#N/A	#N/A	-0.0639	0.769
Tb927.3.1650	Tb927.3.1650	45	1.6676	0.000966368	4.3882	4.0624e-09	#N/A	#N/A	#N/A	#N/A	#N/A	-0.2794	0.0805
Tb927.3.1660	Tb927.3.1660	274	2.4005	3.2878e-16	5.3908	2.94377e-31	#N/A	#N/A	#N/A	#N/A	#N/A	-0.0391	0.653
Tb927.3.1670	Tb927.3.1670	1191	0.0203	1	-0.3381	0.388782	#N/A	#N/A	#N/A	#N/A	#N/A	-0.0097	0.922
Tb927.3.1680	Tb927.3.1680	1948	-0.1404	1	-0.1346	0.897692	921	-0.1082	1	0.0103	0.997572	-0.1701	0.0277
Tb927.3.1690	Tb927.3.1690	1742	-0.1251	1	0.1488	0.872119	818	-0.1624	1	0.2369	0.73726	0.4084	1.06e-06
Tb927.3.1700	Tb927.3.1700	507	-0.3603	0.441683	-0.3496	0.379982	270	-0.4334	0.406924	-0.5427	0.134439	-0.0481	0.691
Tb927.3.1710	Tb927.3.1710	1201	-0.2404	1	-0.2213	0.742103	#N/A	#N/A	#N/A	#N/A	#N/A	0.0973	0.31
Tb927.3.1720	Tb927.3.1720	478	1.1875	0.111753	1.9199	0.000824257	450	1.0082	0.228097	1.9699	0.000364315	0.5901	1.69e-05
Tb927.3.1730	Tb927.3.1730	1241	-0.0979	1	0.078	0.898134	429	0.3946	0.644517	0.0044	1	0.2506	0.0213
Tb927.3.1740	Tb927.3.1740	1116	-0.1175	1	-0.2489	0.290456	#N/A	#N/A	#N/A	#N/A	#N/A	-0.0757	0.355
Tb927.3.1750	Tb927.3.1750	360	-0.0475	1	0.0734	0.938711	78	-0.1357	1	0.1818	0.827016	0.0761	0.635
Tb927.3.1760	Tb927.3.1760	1679	-0.0873	1	-0.0911	0.872119	515	-0.1277	1	-0.074	0.868425	-0.0994	0.366
Tb927.3.1770	Tb927.3.1770	889	0.0623	1	-0.3325	0.358886	115	-0.0765	1	-0.4143	0.57584	0.0252	0.804
Tb927.3.1780	Tb927.3.1780	759	0.0017	1	-0.0435	0.937289	624	0.0409	1	0.0016	1	0.0312	0.859
Tb927.3.1790	Tb927.3.1790	5106	-0.1186	1	-0.0886	0.917482	6053	-0.116	1	-0.0184	0.978812	0.3288	2.28e-05
Tb927.3.1800	Tb927.3.1800	1984	-0.1061	1	-0.2506	0.629533	730	-0.0714	1	-0.0912	0.938576	0.015	0.863
Tb927.3.1810	Tb927.3.1810	1036	0.064	1	0.0636	0.913735	648	-0.0307	1	0.0926	0.836009	0.1667	0.0834
Tb927.3.1820	Tb927.3.1820	613	0.1374	1	1.0218	0.000192567	1262	0.6229	0.173238	1.3419	8.89969e-06	-0.0028	0.984
Tb927.3.1830	Tb927.3.1830	739	0.1717	0.768164	0.0981	0.764143	#N/A	#N/A	#N/A	#N/A	#N/A	0.2199	0.0286
Tb927.3.1840	Tb927.3.1840	1611	0.3085	0.988666	0.1803	0.845745	687	0.291	0.972704	0.3122	0.659798	0.5512	5.61e-21
Tb927.3.1850	Tb927.3.1850	1185	0.3263	0.565667	0.333	0.392762	#N/A	#N/A	#N/A	#N/A	#N/A	-0.0501	0.611
Tb927.3.1860	Tb927.3.1860	452	0.3137	1	0.2541	0.855727	129	0.5092	0.674515	0.686	0.293326	0.0436	0.651
Tb927.3.1870.1	Tb927.3.1870	377	0.3231	0.850378	0.3299	0.586013	537	0.2287	0.809723	0.254	0.499624	0.5296	1.81e-05
Tb927.3.1870.2	Tb927.3.1870	396	0.3366	0.836135	0.2918	0.655184	537	0.2287	0.809723	0.254	0.499624	0.5296	1.81e-05
Tb927.3.1880	Tb927.3.1880	1518	0.0834	1	-0.0635	0.911696	203	0.1582	1	-0.0504	0.956352	0.2434	0.00518
Tb927.3.1890	Tb927.3.1890	1673	-0.1187	1	-0.2489	0.352877	457	-0.1056	1	-0.1487	0.825732	0.3442	0.00029
Tb927.3.1900	Tb927.3.1900	677	0.3638	1	0.0375	0.983593	#N/A	#N/A	#N/A	#N/A	#N/A	-0.0045	0.963
Tb927.3.1910	Tb927.3.1910	523	2.1771	5.79126e-18	1.2919	3.28432e-06	712	2.2246	7.63367e-18	2.3103	9.45307e-19	0.1933	0.0102
Tb927.3.1920	Tb927.3.1920	960	-0.0633	1	-0.2963	0.765752	557	-0.079	1	0.1866	0.81702	-0.2621	0.000847
Tb927.3.1930	Tb927.3.1930	1427	-0.1812	1	-0.3978	0.482467	133	-0.2676	0.928141	-0.3353	0.530551	0.1843	0.0478
Tb927.3.1940	Tb927.3.1940	900	-0.07	1	-0.2622	0.592033	#N/A	#N/A	#N/A	#N/A	#N/A	0.0514	0.701
Tb927.3.1955	Tb927.3.1955	353	0.5673	0.0684831	1.0493	2.92686e-05	#N/A	#N/A	#N/A	#N/A	#N/A	0.4194	0.000593
Tb927.3.1960	Tb927.3.1960	342	-0.0497	1	-0.1994	0.762576	808	-0.0592	1	-0.0494	0.905083	-0.0473	0.787
Tb927.3.1970	Tb927.3.1970	1259	-0.1159	1	-0.2547	0.426906	#N/A	#N/A	#N/A	#N/A	#N/A	0.1216	0.304
Tb927.3.1980	Tb927.3.1980	968	-0.0023	1	-0.1848	0.64856	#N/A	#N/A	#N/A	#N/A	#N/A	0.1971	0.0467
Tb927.3.1990	Tb927.3.1990	672	0.2435	1	-0.0799	0.928886	333	0.0499	1	-0.1133	0.817222	0.1151	0.215
Tb927.3.2000	Tb927.3.2000	726	0.0069	1	-0.3192	0.403062	#N/A	#N/A	#N/A	#N/A	#N/A	0.2935	0.00752
Tb927.3.2010	Tb927.3.2010	1912	-0.0179	1	-0.1458	0.742209	561	-0.0322	1	-0.122	0.803512	0.0624	0.52
Tb927.3.2020	Tb927.3.2020	784	0.0096	1	-0.3097	0.689382	130	-0.0688	1	-0.1346	0.84668	-0.0927	0.326
Tb927.3.2030.1	Tb927.3.2030	358	0.1193	1	0.2133	0.618261	473	-0.0148	1	0.0367	0.941087	0.1137	0.532
Tb927.3.2030.2	Tb927.3.2030	368	0.1132	1	0.2096	0.618993	473	-0.0148	1	0.0367	0.941087	0.1137	0.532
Tb927.3.2040	Tb927.3.2040	633	0.2408	1	0.1259	0.901008	466	0.2401	0.859611	0.3402	0.38923	0.1964	0.00721
Tb927.3.2050	Tb927.3.2050	824	0.5766	0.607367	0.3077	0.745965	143	0.5584	0.40302	0.7999	0.106377	0.0316	0.708
Tb927.3.2060	Tb927.3.2060	365	-0.013	1	-0.2813	0.821748	566	-0.0696	1	-0.1401	0.806871	-0.087	0.382
Tb927.3.2070	Tb927.3.2070	1296	-0.1676	1	-0.3774	0.487084	699	-0.1277	1	-0.2954	0.727405	-0.1201	0.0974
Tb927.3.2080	Tb927.3.2080	1821	-0.3397	0.227203	-0.4008	0.0721157	#N/A	#N/A	#N/A	#N/A	#N/A	-0.03	0.819
Tb927.3.2090	Tb927.3.2090	873	-0.1196	1	-0.2963	0.644037	988	-0.1793	1	-0.1205	0.821748	0.1003	0.273
Tb927.3.2100	Tb927.3.2100	1347	0.0299	1	0.1654	0.792013	1177	0.0047	1	0.2988	0.488059	-0.1169	0.165
Tb927.3.2110	Tb927.3.2110	332	0.4952	0.758766	2.2461	1.93909e-07	#N/A	#N/A	#N/A	#N/A	#N/A	0.0664	0.564
Tb927.3.2120	Tb927.3.2120	920	-0.0615	1	-0.3228	0.305871	#N/A	#N/A	#N/A	#N/A	#N/A	-0.0004	0.998
Tb927.3.2130	Tb927.3.2130	1736	0.0201	1	-0.1658	0.778362	#N/A	#N/A	#N/A	#N/A	#N/A	0.1288	0.124
Tb927.3.2140	Tb927.3.2140	1703	0.1816	1	0.0551	0.956201	267	0.0946	1	0.2645	0.464257	0.6478	7.79e-28
Tb927.3.2150	Tb927.3.2150	1342	-0.1891	0.778973	-0.1709	0.592033	809	-0.1652	0.998419	-0.1034	0.83441	0.5049	2.14e-07
Tb927.3.2160	Tb927.3.2160	1916	0.059	1	0.0284	0.942271	541	0.0415	1	0.0385	0.953691	0.3342	0.00022
Tb927.3.2170	Tb927.3.2170	3243	-0.0314	1	-0.1661	0.74793	#N/A	#N/A	#N/A	#N/A	#N/A	-0.1586	0.028
Tb927.3.2180	Tb927.3.2180	3854	-0.0358	1	-0.0394	0.932438	6812	-0.0583	1	-0.0275	0.969384	0.2826	0.000615
Tb927.3.2190	Tb927.3.2190	975	-0.013	1	-0.0521	0.906321	452	-0.1259	1	-0.0498	0.941509	0.1198	0.275
Tb927.3.2200	Tb927.3.2200	1066	0.1101	1	-0.0049	0.997243	278	0.0184	1	0.0378	0.951541	0.0947	0.464
Tb927.3.2210	Tb927.3.2210	983	-0.1052	1	-0.5125	0.17341	602	-0.1915	1	-0.2381	0.639988	0.0386	0.715
Tb927.3.2220	Tb927.3.2220	2086	-0.1132	1	0.0028	1	#N/A	#N/A	#N/A	#N/A	#N/A	0.0372	0.753
Tb927.3.2230	Tb927.3.2230	4079	0.0651	1	-0.0211	0.982372	4805	0.0482	1	0.0712	0.879099	-0.3636	1.04e-06
Tb927.3.2240	Tb927.3.2240	748	-0.2307	0.862295	-0.369	0.29884	#N/A	#N/A	#N/A	#N/A	#N/A	0.0525	0.676
Tb927.3.2250	Tb927.3.2250	232	-0.1756	1	-0.1936	0.750354	37	0.0841	1	-0.5349	0.51386	0.2051	0.242
Tb927.3.2260	Tb927.3.2260	546	-0.0807	1	-0.1132	0.889566	88	-0.2766	1	0.115	0.914817	0.1849	0.179
Tb927.3.2270	Tb927.3.2270	2022	-0.2789	0.488062	-0.4125	0.0755896	293	-0.2823	0.789515	-0.4317	0.213305	0.1661	0.0677
Tb927.3.2280	Tb927.3.2280	942	-0.068	1	0.0917	0.872751	#N/A	#N/A	#N/A	#N/A	#N/A	0.0832	0.432
Tb927.3.2290	Tb927.3.2290	1202	0.0503	1	-0.0435	0.957541	#N/A	#N/A	#N/A	#N/A	#N/A	-0.0099	0.953
Tb927.3.2300	Tb927.3.2300	1481	-0.0548	1	-0.078	0.897342	142	-0.1633	1	0.0108	0.997243	0.1252	0.299
Tb927.3.2310	Tb927.3.2310	2137	0.1081	0.983774	0.0534	0.869581	1306	0.0427	1	0.0163	0.976572	-0.0727	0.38
Tb927.3.2320	Tb927.3.2320	958	-0.0769	1	-0.1466	0.698799	1202	-0.0289	1	-0.1787	0.725293	0.0651	0.567
Tb927.3.2330	Tb927.3.2330	1133	0.1546	1	-0.1845	0.67953	138	-0.089	1	0.0084	0.997243	0.0741	0.448
Tb927.3.2340	Tb927.3.2340	547	0.1484	0.92479	0.3217	0.140746	#N/A	#N/A	#N/A	#N/A	#N/A	0.0912	0.477
Tb927.3.2350	Tb927.3.2350	948	0.0806	1	-0.0567	0.934759	170	-0.0297	1	-0.1313	0.884317	0.1898	0.176
Tb927.3.2360	Tb927.3.2360	885	0.3083	0.461672	0.3141	0.32598	87	0.2687	0.972946	0.5813	0.17579	0.3954	0.000575
Tb927.3.2370	Tb927.3.2370	966	-0.0259	1	0.1748	0.641083	694	-0.0663	1	0.1457	0.728524	0.3836	0.00128
Tb927.3.2380	Tb927.3.2380	238	0.301	0.930113	0.1941	0.800391	108	0.1922	1	0.2585	0.723583	-0.0351	0.889
Tb927.3.2390	Tb927.3.2390	1709	-0.0267	1	-0.0135	0.976902	#N/A	#N/A	#N/A	#N/A	#N/A	0.2665	0.00266
Tb927.3.2400	Tb927.3.2400	1143	0.0629	1	-0.1043	0.857829	478	0.1058	1	0.0459	0.961035	0.5234	1.59e-07
Tb927.3.2410	Tb927.3.2410	1301	0.0782	1	0.0695	0.896914	#N/A	#N/A	#N/A	#N/A	#N/A	0.0822	0.519
Tb927.3.2420	Tb927.3.2420	1444	0.4044	0.63945	0.6463	0.101748	#N/A	#N/A	#N/A	#N/A	#N/A	0.1663	0.0537
Tb927.3.2430	Tb927.3.2430	874	0.104	1	-0.1007	0.872782	229	0.1406	1	0.1034	0.870238	0.0202	0.842
Tb927.3.2440	Tb927.3.2440	336	0.561	0.445987	0.6723	0.205211	17	1.1383	0.334868	0.2456	0.887145	0.2972	0.00307
Tb927.3.2450	Tb927.3.2450	335	-0.0252	1	0.1184	0.858481	#N/A	#N/A	#N/A	#N/A	#N/A	-0.9355	4.35e-16
Tb927.3.2460	Tb927.3.2460	467	0.279	0.979636	0.0925	0.919574	271	0.1713	0.998419	0.2023	0.649592	0.6003	2.54e-10
Tb927.3.2470	Tb927.3.2470	1411	-0.1439	1	0.0377	0.971233	645	-0.2291	1	0.0401	0.974081	-0.4062	5.16e-08
Tb927.3.2475	Tb927.3.2475	661	0.1157	1	0.5555	0.467086	774	0.1592	1	0.4805	0.556977	-0.1227	0.3
Tb927.3.2477	Tb927.3.2477	241	-0.8917	0.329893	-0.926	0.209028	540	-1.071	0.0121103	-0.9964	0.0186409	-0.3165	0.072
Tb927.3.2480	Tb927.3.2480	547	0.0747	1	-0.1214	0.856646	325	0.0025	1	-0.0171	0.979136	0.3644	0.000101
Tb927.3.2490	Tb927.3.2490	3274	0.1841	1	0.3154	0.515748	604	0.0645	1	0.3111	0.507119	0.1754	0.0053
Tb927.3.2500	Tb927.3.2500	75	1.6572	6.54893e-08	1.4322	1.35467e-05	130	1.3367	3.58431e-05	0.797	0.0430842	0.4744	0.00726
Tb927.3.2510.1-p1-CDS1	Tb927.3.2510	8	0.9981	0.922305	-3.0029	0.283424	#N/A	#N/A	#N/A	#N/A	#N/A	-0.348	0.0164
Tb927.3.2510.2-p1-CDS1	Tb927.3.2510	8	1.0062	0.927308	-2.9999	0.288994	#N/A	#N/A	#N/A	#N/A	#N/A	-0.348	0.0164
Tb927.3.2520	Tb927.3.2520	0	-1.1442	NA	0	NA	#N/A	#N/A	#N/A	#N/A	#N/A	-0.1307	0.818
Tb927.3.2530	Tb927.3.2530	0	0.3303	1	0.8005	0.939929	#N/A	#N/A	#N/A	#N/A	#N/A	-0.2733	0.679
Tb927.3.2540.1	Tb927.3.2540	0	-0.1824	1	0.8005	0.95919	#N/A	#N/A	#N/A	#N/A	#N/A	0.0837	0.914
Tb927.3.2540.2	Tb927.3.2540	0	-0.1824	1	0.8005	0.95919	#N/A	#N/A	#N/A	#N/A	#N/A	0.0837	0.914
Tb927.3.2550	Tb927.3.2550	0	0.7793	NA	0	NA	2	-0.2076	1	-0.1612	0.98736	-0.0333	0.962
Tb927.3.2560	Tb927.3.2560	0	-2.6261	1	0	1	#N/A	#N/A	#N/A	#N/A	#N/A	0.7702	0.129
Tb927.3.2570	Tb927.3.2570	0	2.1597	NA	0	NA	#N/A	#N/A	#N/A	#N/A	#N/A	0.5869	0.235
Tb927.3.2580	Tb927.3.2580	1	-1.6641	1	-2.3127	0.775902	#N/A	#N/A	#N/A	#N/A	#N/A	-0.0369	0.932
Tb927.3.2590	Tb927.3.2590	2	-0.1179	1	0.4383	0.938785	#N/A	#N/A	#N/A	#N/A	#N/A	0.1979	0.472
Tb927.3.2600	Tb927.3.2600	4524	-0.1014	1	-0.4172	0.588229	1471	-0.1504	1	-0.2533	0.769866	-0.3577	1.32e-10
Tb927.3.2610	Tb927.3.2610	586	0.0569	1	-0.2182	0.694682	218	-0.0928	1	-0.2109	0.75877	0.0011	0.991
Tb927.3.2620.1	Tb927.3.2620	1604	-0.2837	1	-0.5293	0.371099	543	-0.2313	1	-0.3844	0.657828	-0.1036	0.18
Tb927.3.2620.2	Tb927.3.2620	1678	-0.2881	0.979636	-0.517	0.351579	543	-0.2313	1	-0.3844	0.657828	-0.1036	0.18
Tb927.3.2630	Tb927.3.2630	2063	-0.2725	0.758427	-0.4747	0.118451	1116	-0.3783	0.0143197	-0.3494	0.0233575	-0.1404	0.094
Tb927.3.2640	Tb927.3.2640	892	-0.1794	1	-0.3526	0.437265	#N/A	#N/A	#N/A	#N/A	#N/A	-0.1858	0.113
Tb927.3.2650	Tb927.3.2650	1012	-0.2305	1	-0.1479	0.831272	2519	-0.2285	0.877333	-0.26	0.537877	-0.1021	0.551
Tb927.3.2660	Tb927.3.2660	2231	-0.2041	0.979086	-0.352	0.380862	206	-0.3012	0.721213	-0.1537	0.776689	-0.0058	0.959
Tb927.3.2670	Tb927.3.2670	1042	-0.119	1	-0.1171	0.760221	583	-0.1646	1	-0.1084	0.835442	-0.2226	0.0317
Tb927.3.2680	Tb927.3.2680	1406	-0.2146	0.912492	-0.278	0.493471	558	-0.2429	0.997057	-0.2287	0.716787	-0.4094	1.2e-07
Tb927.3.2690	Tb927.3.2690	626	0.1286	1	-0.3646	0.742345	#N/A	#N/A	#N/A	#N/A	#N/A	-0.2324	0.00125
Tb927.3.2700	Tb927.3.2700	1542	-0.3337	0.62883	-0.5628	0.0698155	#N/A	#N/A	#N/A	#N/A	#N/A	-0.1819	0.0738
Tb927.3.2710	Tb927.3.2710	581	-0.077	1	-0.4084	0.414281	386	-0.2504	0.811105	-0.3535	0.349165	-0.2365	0.00134
Tb927.3.2720	Tb927.3.2720	514	-0.0532	1	-0.2007	0.835399	54	-0.162	1	-0.1415	0.882453	-0.3885	7.27e-06
Tb927.3.2730	Tb927.3.2730	1444	-0.2563	1	-0.3762	0.557	#N/A	#N/A	#N/A	#N/A	#N/A	-0.204	0.00223
Tb927.3.2740	Tb927.3.2740	1474	-0.2376	1	-0.4573	0.378988	856	-0.2324	0.86024	-0.3378	0.354691	-0.3771	3e-06
Tb927.3.2750	Tb927.3.2750	1378	-0.4709	0.582197	-0.6221	0.196293	529	-0.5415	0.308545	-0.4279	0.407004	-0.3995	3.97e-07
Tb927.3.2760	Tb927.3.2760	1335	-0.1855	0.973289	-0.2658	0.506039	#N/A	#N/A	#N/A	#N/A	#N/A	-0.1386	0.0614
Tb927.3.2770.1	Tb927.3.2770	1870	-0.2521	1	-0.4292	0.485704	961	-0.2258	1	-0.501	0.458513	-0.1215	0.103
Tb927.3.2770.2	Tb927.3.2770	1887	-0.2514	1	-0.4344	0.476188	961	-0.2258	1	-0.501	0.458513	-0.1215	0.103
Tb927.3.2780	Tb927.3.2780	1226	-0.1865	1	-0.3965	0.405964	#N/A	#N/A	#N/A	#N/A	#N/A	-0.0835	0.338
Tb927.3.2790	Tb927.3.2790	842	-0.1207	1	-0.375	0.523822	#N/A	#N/A	#N/A	#N/A	#N/A	-0.099	0.264
Tb927.3.2800	Tb927.3.2800	561	-0.1142	1	-0.2958	0.565586	#N/A	#N/A	#N/A	#N/A	#N/A	-0.0997	0.352
Tb927.3.2810	Tb927.3.2810	1401	-0.363	0.915155	-0.6083	0.310049	#N/A	#N/A	#N/A	#N/A	#N/A	-0.3598	2.9e-07
Tb927.3.2820	Tb927.3.2820	1228	-0.1063	1	-0.2785	0.442442	321	-0.1771	1	-0.1369	0.868961	-0.2037	0.012
Tb927.3.2830	Tb927.3.2830	927	-0.4573	0.0702271	-0.4275	0.0852437	248	-0.5506	0.0114976	-0.3517	0.205212	-0.5412	3e-09
Tb927.3.2840	Tb927.3.2840	869	-0.1232	1	-0.1675	0.694186	217	-0.0135	1	-0.3064	0.390034	-0.0973	0.51
Tb927.3.2850	Tb927.3.2850	603	-0.135	1	-0.1603	0.692272	#N/A	#N/A	#N/A	#N/A	#N/A	0.1378	0.306
Tb927.3.2860	Tb927.3.2860	344	-0.3954	0.709453	-0.6652	0.131144	#N/A	#N/A	#N/A	#N/A	#N/A	-0.2369	0.0335
Tb927.3.2870	Tb927.3.2870	972	-0.2061	1	-0.4906	0.350917	534	-0.2172	1	-0.4706	0.261142	-0.2392	0.00741
Tb927.3.2880	Tb927.3.2880	1644	-0.447	0.00826855	-0.3719	0.0361068	2539	-0.4913	0.0413974	-0.3944	0.120098	0.4149	0.00637
Tb927.3.2890	Tb927.3.2890	1388	-0.2095	1	0.0636	0.934897	#N/A	#N/A	#N/A	#N/A	#N/A	-0.2345	0.403
Tb927.3.2900	Tb927.3.2900	2305	-0.4445	0.798527	-0.4071	0.593823	1051	-0.4518	0.696813	-0.2167	0.796421	-0.576	5.91e-13
Tb927.3.2910	Tb927.3.2910	328	0.2064	1	0.8511	0.0171975	150	0.009	1	0.7963	0.0130339	-0.0177	0.925
Tb927.3.2920	Tb927.3.2920	253	0.3693	0.807173	-0.0515	0.961035	133	0.3354	0.792889	-0.1094	0.894625	0.3408	0.0039
Tb927.3.2930	Tb927.3.2930	75	1.2399	0.546516	1.7477	0.170443	398	0.8996	0.561558	1.1167	0.230681	0.1825	0.245
Tb927.3.2940	Tb927.3.2940	318	-0.0031	1	0.0969	0.899717	137	-0.2667	0.984015	0.0018	1	-0.1127	0.443
Tb927.3.2950	Tb927.3.2950	1259	-0.1381	0.912897	-0.1038	0.746139	466	-0.0933	1	0.0926	0.897342	-0.0244	0.793
Tb927.3.2960	Tb927.3.2960	2869	0.8861	0.164392	1.1099	0.0283198	1929	0.8896	0.227584	1.2445	0.0205033	-0.5216	2.6e-18
Tb927.3.2970	Tb927.3.2970	929	-0.0849	1	-0.1852	0.705613	278	-0.1871	1	-0.1194	0.875941	0.3649	0.004
Tb927.3.2980	Tb927.3.2980	705	-0.1303	1	-0.3694	0.330168	420	-0.0787	1	-0.2399	0.362536	-0.0824	0.506
Tb927.3.2990	Tb927.3.2990	1332	0.0271	1	-0.2565	0.628364	834	-0.0311	1	-0.2092	0.757777	0.091	0.536
Tb927.3.3000	Tb927.3.3000	1370	0.0157	1	-0.0818	0.897057	723	-0.0163	1	-0.2093	0.572459	0.0167	0.847
Tb927.3.3010	Tb927.3.3010	937	-0.0231	1	-0.0767	0.922719	597	-0.0673	1	-0.0808	0.92692	0.0801	0.652
Tb927.3.3020	Tb927.3.3020	1246	-0.0466	1	-0.2957	0.399319	#N/A	#N/A	#N/A	#N/A	#N/A	0.045	0.741
Tb927.3.3030	Tb927.3.3030	1405	-0.0186	1	-0.2505	0.715587	251	0.0027	1	-0.0303	0.974609	-0.0383	0.705
Tb927.3.3040	Tb927.3.3040	952	0.0585	1	-0.0368	0.969394	1410	0.0672	1	0.2061	0.675039	0.1812	0.0409
Tb927.3.3050	Tb927.3.3050	788	-0.1878	0.918341	-0.4374	0.0899616	214	0.0152	1	-0.1574	0.775995	0.0826	0.41
Tb927.3.3060	Tb927.3.3060	520	2.9707	2.85491e-12	3.4359	1.4944e-13	#N/A	#N/A	#N/A	#N/A	#N/A	0.9235	1.43e-31
Tb927.3.3070	Tb927.3.3070	370	1.0764	0.0254717	0.9233	0.077309	#N/A	#N/A	#N/A	#N/A	#N/A	0.3822	1.41e-08
Tb927.3.3080	Tb927.3.3080	915	0.0175	1	-0.2196	0.657121	462	0.0665	1	-0.1798	0.724745	0.0149	0.898
Tb927.3.3090	Tb927.3.3090	2039	-0.1289	1	-0.4335	0.293317	243	-0.1388	1	-0.3413	0.643132	0.0399	0.657
Tb927.3.3100	Tb927.3.3100	605	-1.1702	4.67868e-11	-0.8829	2.92332e-06	609	-1.3961	1.94328e-13	-1.4231	5.97223e-14	-1.3751	8.9e-27
Tb927.3.3110	Tb927.3.3110	1862	0.0081	1	-0.1923	0.744236	#N/A	#N/A	#N/A	#N/A	#N/A	-0.006	0.949
Tb927.3.3120	Tb927.3.3120	991	-0.1191	1	-0.2463	0.589584	#N/A	#N/A	#N/A	#N/A	#N/A	0.0543	0.608
Tb927.3.3130	Tb927.3.3130	1797	-0.0714	1	0.2764	0.742345	121	0.0282	1	0.2645	0.796785	-0.2248	0.000903
Tb927.3.3140	Tb927.3.3140	617	-0.0392	1	0.1087	0.783358	220	-0.0726	1	0.02	0.976572	0.133	0.375
Tb927.3.3150	Tb927.3.3150	1049	-0.0849	1	-0.132	0.712904	#N/A	#N/A	#N/A	#N/A	#N/A	0.1223	0.199
Tb927.3.3160	Tb927.3.3160	576	0.0487	1	-0.0658	0.944489	261	0.1018	1	-0.1082	0.897692	-0.1282	0.165
Tb927.3.3170	Tb927.3.3170	1779	0.037	1	-0.2203	0.713977	780	0.0087	1	-0.005	0.998247	-0.0444	0.649
Tb927.3.3180	Tb927.3.3180	602	0.0082	1	-0.5064	0.569085	279	-0.0972	1	-0.0603	0.958151	-0.2485	0.00102
Tb927.3.3190	Tb927.3.3190	983	0.96	0.0633104	2.4133	9.41534e-11	#N/A	#N/A	#N/A	#N/A	#N/A	-0.1687	0.0134
Tb927.3.3200	Tb927.3.3200	1044	0.0767	1	0.0252	0.98071	1353	-0.0269	1	0.2452	0.724894	0.2741	0.000831
Tb927.3.3210	Tb927.3.3210	214	-0.0485	1	0.1691	0.869581	78	0.2513	1	0.4565	0.684748	-0.4554	4.49e-05
Tb927.3.3220	Tb927.3.3220	774	-0.0288	1	-0.0927	0.893791	#N/A	#N/A	#N/A	#N/A	#N/A	-0.1217	0.182
Tb927.3.3230	Tb927.3.3230	1988	-0.1056	1	-0.4234	0.387998	#N/A	#N/A	#N/A	#N/A	#N/A	-0.0979	0.409
Tb927.3.3240	Tb927.3.3240	979	-0.0719	1	-0.2632	0.504103	1543	-0.078	1	-0.1902	0.615188	0.3989	0.000798
Tb927.3.3250	Tb927.3.3250	1117	-0.1513	1	-0.3643	0.478523	415	-0.2791	1	-0.366	0.579991	-0.0781	0.577
Tb927.3.3260	Tb927.3.3260	1740	-0.1652	1	-0.3207	0.414304	349	-0.1867	1	-0.2548	0.673828	-0.1375	0.206
Tb927.3.3270	Tb927.3.3270	716	-0.267	1	-0.7099	0.51272	1046	-0.2534	1	-0.485	0.551791	-0.9363	2.4e-22
Tb927.3.3280	Tb927.3.3280	741	0.0573	1	0.1572	0.683966	#N/A	#N/A	#N/A	#N/A	#N/A	-0.1632	0.111
Tb927.3.3290	Tb927.3.3290	554	-0.1454	1	-0.3415	0.371584	317	-0.2072	1	-0.2358	0.727592	0.0224	0.887
Tb927.3.3300	Tb927.3.3300	1494	0.1901	1	-0.2981	0.757424	#N/A	#N/A	#N/A	#N/A	#N/A	-0.1112	0.174
Tb927.3.3310	Tb927.3.3310	39014	-0.3382	0.205477	-0.3339	0.157807	3593	-0.3127	0.681402	-0.2963	0.501589	-0.0618	0.453
Tb927.3.3320	Tb927.3.3320	39158	-0.323	0.24404	-0.3391	0.144704	7501	-0.3398	0.603108	-0.2522	0.59707	-0.0429	0.617
Tb927.3.3330	Tb927.3.3330	2512	-0.0027	1	0.1673	0.788279	641	0.0288	1	-0.0072	0.997552	0.0579	0.621
Tb927.3.3340	Tb927.3.3340	591	0.1465	1	0.1452	0.907552	989	-0.0961	1	0.0236	0.980218	0.5963	3.28e-14
Tb927.3.3350	Tb927.3.3350	796	0.1192	1	-0.1502	0.820559	#N/A	#N/A	#N/A	#N/A	#N/A	-0.0886	0.402
Tb927.3.3360	Tb927.3.3360	950	-0.1024	1	-0.4223	0.175598	#N/A	#N/A	#N/A	#N/A	#N/A	-0.0634	0.525
Tb927.3.3370	Tb927.3.3370	1782	0.058	1	-0.0197	0.976369	429	-0.0009	1	0.1407	0.778362	0.0326	0.769
Tb927.3.3380	Tb927.3.3380	314	0.2112	1	-0.3837	0.68242	#N/A	#N/A	#N/A	#N/A	#N/A	-0.1079	0.284
Tb927.3.3390	Tb927.3.3390	930	-0.0027	1	-0.1758	0.615188	218	-0.0141	1	-0.1334	0.879969	0.0864	0.374
Tb927.3.3400	Tb927.3.3400	514	-0.1064	1	-0.2533	0.405694	#N/A	#N/A	#N/A	#N/A	#N/A	0.0154	0.911
Tb927.3.3410	Tb927.3.3410	1263	-0.0819	1	-0.3523	0.656983	371	-0.1031	1	-0.1793	0.799664	0.0253	0.807
Tb927.3.3420	Tb927.3.3420	5	0.5079	1	0.4877	0.873903	#N/A	#N/A	#N/A	#N/A	#N/A	-0.0306	0.959
Tb927.3.3430	Tb927.3.3430	3	0.6215	1	1.5159	0.692757	#N/A	#N/A	#N/A	#N/A	#N/A	0.4436	0.532
Tb927.3.3440	Tb927.3.3440	890	0.0159	1	0.0087	0.997572	580	-0.0073	1	0.0432	0.958927	0.3378	0.00343
Tb927.3.3450	Tb927.3.3450	2603	0.0386	1	0.3403	0.603189	370	-0.0198	1	0.449	0.450297	-0.3514	3.54e-08
Tb927.3.3460	Tb927.3.3460	2530	0.0689	1	-0.0576	0.937194	2257	0.1117	1	0.1699	0.688578	0.2949	0.000228
Tb927.3.3470	Tb927.3.3470	599	0.1114	1	-0.0744	0.872599	139	0.0592	1	0.0484	0.940767	0.1611	0.233
Tb927.3.3480	Tb927.3.3480	320	0.0511	1	-0.1729	0.811492	1726	0.0405	1	-0.1144	0.776689	0.138	0.33
Tb927.3.3490	Tb927.3.3490	995	0.2017	1	0.3585	0.475159	#N/A	#N/A	#N/A	#N/A	#N/A	-0.2942	0.00989
Tb927.3.3500	Tb927.3.3500	1743	0.0484	1	-0.101	0.836809	#N/A	#N/A	#N/A	#N/A	#N/A	0.2461	0.00286
Tb927.3.3510	Tb927.3.3510	750	-0.2119	1	-0.5201	0.422567	#N/A	#N/A	#N/A	#N/A	#N/A	-0.2075	0.0701
Tb927.3.3520	Tb927.3.3520	694	-0.0521	1	-0.1837	0.657828	#N/A	#N/A	#N/A	#N/A	#N/A	0.0075	0.962
Tb927.3.3530	Tb927.3.3530	1095	0.0079	1	-0.1147	0.819876	#N/A	#N/A	#N/A	#N/A	#N/A	0.0978	0.406
Tb927.3.3540	Tb927.3.3540	2565	0.0135	1	-0.2763	0.687664	399	-0.0021	1	-0.1963	0.858163	-0.0032	0.979
Tb927.3.3550	Tb927.3.3550	1220	0.475	0.492981	1.304	3.77965e-05	1096	0.1919	1	-0.0508	0.949629	0.0856	0.295
Tb927.3.3560	Tb927.3.3560	888	0.1	1	-0.2195	0.828429	1809	0.0163	1	-0.0982	0.868425	-0.1581	0.0199
Tb927.3.3570	Tb927.3.3570	811	0.0038	1	-0.0203	0.982372	#N/A	#N/A	#N/A	#N/A	#N/A	0.3756	0.0381
Tb927.3.3580	Tb927.3.3580	3562	0.1808	1	0.282	0.675839	1778	0.1563	1	0.2782	0.477978	0.4471	7.67e-15
Tb927.3.3590	Tb927.3.3590	1448	-0.2023	1	-0.3455	0.445606	855	-0.326	0.973289	-0.2821	0.728196	-0.2204	0.0346
Tb927.3.3600	Tb927.3.3600	727	-0.1479	1	-0.086	0.857387	#N/A	#N/A	#N/A	#N/A	#N/A	-0.0108	0.949
Tb927.3.3610	Tb927.3.3610	2028	0.1539	0.912492	0.0558	0.892058	#N/A	#N/A	#N/A	#N/A	#N/A	0.1703	0.066
Tb927.3.3620	Tb927.3.3620	353	0.0724	1	-0.0524	0.922735	742	0.0159	1	-0.0305	0.951541	0.1182	0.379
Tb927.3.3630	Tb927.3.3630	815	-0.0995	1	-0.2137	0.765513	596	-0.0094	1	0.1225	0.777075	0.3676	0.00106
Tb927.3.3640	Tb927.3.3640	1650	0.0076	1	-0.2031	0.729782	130	0.0459	1	-0.0537	0.969394	0.0112	0.926
Tb927.3.3650	Tb927.3.3650	1252	0.1291	1	-0.1643	0.829356	#N/A	#N/A	#N/A	#N/A	#N/A	0.0144	0.898
Tb927.3.3660	Tb927.3.3660	1522	-0.1156	1	-0.2376	0.599904	2484	-0.1331	1	-0.1969	0.681113	0.519	3.28e-07
Tb927.3.3670	Tb927.3.3670	1481	-0.3077	0.778973	-0.4032	0.354691	357	-0.3122	0.930277	-0.26	0.716322	-0.3675	2.88e-05
Tb927.3.3680	Tb927.3.3680	312	0.0483	1	-0.1418	0.806871	459	0.0573	1	-0.2354	0.391151	0.1477	0.285
Tb927.3.3690	Tb927.3.3690	1939	0.1874	1	-0.1758	0.854902	1474	0.2189	0.921325	0.2376	0.601129	0.1641	0.0319
Tb927.3.3700	Tb927.3.3700	151	-0.7353	0.174582	-0.6305	0.239625	#N/A	#N/A	#N/A	#N/A	#N/A	-0.0281	0.904
Tb927.3.3710	Tb927.3.3710	1363	0.023	1	-0.1054	0.832518	280	-0.0688	1	0.0074	0.997933	0.2838	0.0135
Tb927.3.3720	Tb927.3.3720	468	0.2083	0.949242	0.4478	0.167236	#N/A	#N/A	#N/A	#N/A	#N/A	0.4743	2.64e-05
Tb927.3.3730	Tb927.3.3730	1086	0.32	0.972215	-0.1394	0.881805	501	0.3006	0.994397	0.0415	0.973017	0.4121	6.91e-10
Tb927.3.3740	Tb927.3.3740	1063	-0.0965	1	-0.1834	0.797637	1645	0.2132	0.937736	0.2712	0.534995	-0.2091	0.0212
Tb927.3.3750	Tb927.3.3750	1802	0.1747	1	0.4437	0.478239	339	0.1075	1	0.4369	0.514453	-0.4041	1.28e-07
Tb927.3.3760	Tb927.3.3760	3068	0.0381	1	0.1366	0.797651	#N/A	#N/A	#N/A	#N/A	#N/A	-0.3315	5.12e-06
Tb927.3.3770	Tb927.3.3770	1180	0.1346	1	0.059	0.921484	1532	0.3393	0.121664	0.2552	0.290124	-0.1479	0.214
Tb927.3.3780	Tb927.3.3780	3323	0.0819	1	0.1944	0.685427	5392	0.0574	1	0.1751	0.776689	-0.3257	2.89e-06
Tb927.3.3790	Tb927.3.3790	1184	0.1572	0.983774	0.0853	0.85427	575	0.0933	1	0.1066	0.844607	-0.0904	0.476
Tb927.3.3800.1	Tb927.3.3800	2069	-0.0593	1	-0.3743	0.476844	#N/A	#N/A	#N/A	#N/A	#N/A	-0.2013	0.0052
Tb927.3.3800.2	Tb927.3.3800	2108	-0.0532	1	-0.3737	0.474621	#N/A	#N/A	#N/A	#N/A	#N/A	-0.2013	0.0052
Tb927.3.3810	Tb927.3.3810	746	-0.0809	1	-0.3704	0.378938	#N/A	#N/A	#N/A	#N/A	#N/A	0.1671	0.16
Tb927.3.3820	Tb927.3.3820	1282	0.0499	1	-0.0771	0.880715	#N/A	#N/A	#N/A	#N/A	#N/A	0.1362	0.0964
Tb927.3.3830	Tb927.3.3830	758	-0.0309	1	-0.1061	0.866917	82	-0.0349	1	-0.0226	0.990133	-0.2172	0.0402
Tb927.3.3840	Tb927.3.3840	1090	0.0415	1	0.0424	0.93611	78	0.1616	1	0.1284	0.881805	0.0777	0.669
Tb927.3.3850	Tb927.3.3850	966	0.0826	1	-0.3294	0.657828	#N/A	#N/A	#N/A	#N/A	#N/A	-0.1263	0.0782
Tb927.3.3860	Tb927.3.3860	1113	-0.0687	1	-0.3054	0.701395	263	-0.1132	1	-0.0171	0.987401	0.2519	0.000399
Tb927.3.3870	Tb927.3.3870	737	0.1718	1	-0.1166	0.915855	#N/A	#N/A	#N/A	#N/A	#N/A	0.1665	0.0093
Tb927.3.3880	Tb927.3.3880	846	-0.0418	1	-0.0046	0.999394	707	-0.0619	1	0.0726	0.887419	-0.1263	0.342
Tb927.3.3890	Tb927.3.3890	806	-0.1873	0.983129	-0.2567	0.549225	#N/A	#N/A	#N/A	#N/A	#N/A	-0.1136	0.391
Tb927.3.3900	Tb927.3.3900	1367	0.8309	0.0883934	1.3343	0.000381497	#N/A	#N/A	#N/A	#N/A	#N/A	0.1185	0.191
Tb927.3.3910	Tb927.3.3910	1228	-0.1092	1	-0.2376	0.614609	#N/A	#N/A	#N/A	#N/A	#N/A	-0.0555	0.691
Tb927.3.3920	Tb927.3.3920	542	-0.056	1	-0.3382	0.588901	622	-0.0485	1	-0.2158	0.729717	-0.0564	0.62
Tb927.3.3930	Tb927.3.3930	219	2.0219	1.14607e-06	4.1776	2.81947e-21	208	0.8792	0.366064	1.1155	0.112382	0.7964	3.11e-19
Tb927.3.3940	Tb927.3.3940	532	0.7211	0.501302	0.9973	0.123723	1429	0.5663	0.835531	0.6646	0.479446	-0.391	9.38e-09
Tb927.3.3950	Tb927.3.3950	804	-0.0998	1	-0.2976	0.72471	182	-0.0969	1	-0.3492	0.580498	-0.2162	0.0197
Tb927.3.3960	Tb927.3.3960	680	2.3917	1.67745e-11	3.8589	2.0075e-28	551	1.7732	0.000198139	2.431	5.75492e-08	1.1246	8.76e-40
Tb927.3.3970	Tb927.3.3970	591	0.0273	1	0.1046	0.938024	117	-0.1138	1	0.1266	0.935523	-0.2969	0.000383
Tb927.3.3980	Tb927.3.3980	603	0.0074	1	-0.1054	0.897342	#N/A	#N/A	#N/A	#N/A	#N/A	-0.1219	0.206
Tb927.3.3990	Tb927.3.3990	605	-0.0197	1	-0.1589	0.807415	#N/A	#N/A	#N/A	#N/A	#N/A	-0.1203	0.292
Tb927.3.4000	Tb927.3.4000	1504	0.2923	0.924916	0.5728	0.199112	460	0.2015	1	0.7042	0.10694	0.2337	0.00591
Tb927.3.4005	Tb927.3.4005	75	0.5587	0.292215	0.2508	0.736054	#N/A	#N/A	#N/A	#N/A	#N/A	-0.5079	0.0497
Tb927.3.4010	Tb927.3.4010	52	1.1731	0.0741356	0.6094	0.516377	#N/A	#N/A	#N/A	#N/A	#N/A	0.3056	0.072
Tb927.3.4020	Tb927.3.4020	1776	0.1758	1	0.0963	0.903295	#N/A	#N/A	#N/A	#N/A	#N/A	0.0997	0.156
Tb927.3.4030	Tb927.3.4030	1450	-0.076	1	-0.2791	0.806871	#N/A	#N/A	#N/A	#N/A	#N/A	0.0325	0.754
Tb927.3.4040	Tb927.3.4040	1575	0.034	1	-0.1954	0.757481	1826	-0.0308	1	-0.0354	0.959888	0.1226	0.13
Tb927.3.4050	Tb927.3.4050	1111	-0.053	1	-0.2479	0.671081	356	-0.076	1	-0.3359	0.535154	0.2842	0.0358
Tb927.3.4060	Tb927.3.4060	1675	0.0129	1	-0.1741	0.788212	64	-0.1677	1	-0.2831	0.795669	0.1126	0.226
Tb927.3.4070	Tb927.3.4070	2009	-0.0033	1	-0.1462	0.806871	375	0.3902	0.487768	0.1399	0.812436	-0.5044	6.46e-21
Tb927.3.4080	Tb927.3.4080	3523	-0.2569	0.787305	-0.2053	0.65317	1552	-0.45	0.476898	-0.2602	0.665844	0.0869	0.269
Tb927.3.4090	Tb927.3.4090	2236	-0.2472	0.882119	-0.2161	0.67172	647	0.2523	0.864399	0.1603	0.761174	-0.1422	0.0267
Tb927.3.4100	Tb927.3.4100	2003	-0.06	1	-0.2024	0.681798	121	0.1022	1	0.2483	0.694186	-0.3757	1.71e-08
Tb927.3.4110	Tb927.3.4110	1576	0.0793	1	-0.0546	0.932143	249	0.2751	0.834161	0.1727	0.746139	-0.4129	2.9e-13
Tb927.3.4120	Tb927.3.4120	2267	0.0562	1	-0.1551	0.806333	#N/A	#N/A	#N/A	#N/A	#N/A	0.0082	0.936
Tb927.3.4130	Tb927.3.4130	1391	0.0179	1	-0.1495	0.701395	1566	-0.0639	1	-0.0875	0.859673	0.2672	0.0268
Tb927.3.4140	Tb927.3.4140	2346	-0.0002	1	-0.0805	0.830615	145	-0.1175	1	0.0611	0.937194	0.0276	0.793
Tb927.3.4150	Tb927.3.4150	767	0.3628	0.33787	0.4956	0.0576317	#N/A	#N/A	#N/A	#N/A	#N/A	0.5059	1.72e-07
Tb927.3.4160	Tb927.3.4160	663	-0.112	1	-0.3411	0.798272	388	-0.0992	1	-0.1795	0.834684	-0.2426	0.00894
Tb927.3.4170	Tb927.3.4170	487	0.1188	1	0.1315	0.810428	293	0.0474	1	0.1598	0.774962	0.1991	0.178
Tb927.3.4180	Tb927.3.4180	267	0.2643	1	-0.0815	0.95019	#N/A	#N/A	#N/A	#N/A	#N/A	-0.016	0.921
Tb927.3.4190	Tb927.3.4190	794	-0.1102	1	-0.3352	0.712575	#N/A	#N/A	#N/A	#N/A	#N/A	-0.2472	0.000193
Tb927.3.4200	Tb927.3.4200	1172	-0.3074	0.662416	-0.3235	0.424935	1395	-0.2649	0.412591	-0.2905	0.222078	-0.0737	0.564
Tb927.3.4210	Tb927.3.4210	1707	-0.1249	1	-0.2142	0.796492	295	-0.1038	1	-0.2285	0.792285	0.0706	0.393
Tb927.3.4220	Tb927.3.4220	906	0.0336	1	-0.2235	0.725132	600	-0.0072	1	0.0007	1	0.1499	0.0442
Tb927.3.4230	Tb927.3.4230	905	0.3823	0.538014	0.5137	0.170969	#N/A	#N/A	#N/A	#N/A	#N/A	0.2919	1.94e-06
Tb927.3.4240	Tb927.3.4240	921	-0.1504	1	-0.1082	0.834554	#N/A	#N/A	#N/A	#N/A	#N/A	0.1851	0.129
Tb927.3.4250	Tb927.3.4250	655	0.0131	1	-0.194	0.78783	1010	-0.0222	1	0.0733	0.85427	0.4104	6.57e-08
Tb927.3.4260	Tb927.3.4260	930	0.0027	1	0.0132	0.987204	743	-0.1029	1	0.0391	0.957734	0.22	0.00394
Tb927.3.4270	Tb927.3.4270	525	0.0685	1	0.9454	0.322001	#N/A	#N/A	#N/A	#N/A	#N/A	-0.3657	1.91e-05
Tb927.3.4280	Tb927.3.4280	1671	0.0722	1	-0.2585	0.569174	475	0.0988	1	-0.1001	0.872782	0.3441	1.13e-06
Tb927.3.4290	Tb927.3.4290	5112	0.1188	1	0.126	0.713531	464	0.1628	1	0.2108	0.768198	-0.1054	0.237
Tb927.3.4300	Tb927.3.4300	5287	0.1362	0.924916	0.1592	0.567716	655	0.1078	1	0.2766	0.617456	-0.122	0.182
Tb927.3.4310	Tb927.3.4310	5371	0.0802	1	0.0896	0.807975	673	0.0542	1	0.2132	0.724921	-0.1485	0.0943
Tb927.3.4320	Tb927.3.4320	5311	0.084	1	0.1105	0.73503	646	0.1016	1	0.1866	0.771966	-0.1416	0.0851
Tb927.3.4330	Tb927.3.4330	5137	0.1052	1	0.0603	0.880141	664	0.0522	1	0.1274	0.858694	-0.1552	0.102
Tb927.3.4340	Tb927.3.4340	884	-0.018	1	0.0435	0.967369	#N/A	#N/A	#N/A	#N/A	#N/A	0.2136	0.0173
Tb927.3.4350	Tb927.3.4350	1788	-0.0279	1	-0.2693	0.461328	179	-0.1626	1	-0.0508	0.95919	0.2628	0.000631
Tb927.3.4360	Tb927.3.4360	18326	-0.3086	0.44227	-0.1617	0.694186	5005	-0.2987	0.699843	-0.1756	0.729717	-0.0197	0.851
Tb927.3.4370	Tb927.3.4370	823	0.0364	1	-0.1907	0.659902	#N/A	#N/A	#N/A	#N/A	#N/A	0.1397	0.228
Tb927.3.4380	Tb927.3.4380	960	-0.1363	1	-0.3163	0.389061	106	-0.0248	1	-0.0945	0.89916	0.1326	0.206
Tb927.3.4390	Tb927.3.4390	1416	-0.1598	0.908563	-0.2165	0.463447	#N/A	#N/A	#N/A	#N/A	#N/A	0.354	4.17e-05
Tb927.3.4400	Tb927.3.4400	286	0.3306	0.525932	0.3863	0.271624	#N/A	#N/A	#N/A	#N/A	#N/A	0.1933	0.105
Tb927.3.4410	Tb927.3.4410	477	-0.0417	1	-0.0223	0.975835	87	0.0531	1	0.1246	0.859701	0.0449	0.751
Tb927.3.4420	Tb927.3.4420	580	0.0233	1	-0.2307	0.476032	#N/A	#N/A	#N/A	#N/A	#N/A	-0.0244	0.823
Tb927.3.4430	Tb927.3.4430	1236	-0.0238	1	-0.2835	0.396143	#N/A	#N/A	#N/A	#N/A	#N/A	0.1106	0.259
Tb927.3.4440	Tb927.3.4440	605	-0.2092	1	-0.3091	0.557264	89	-0.1617	1	-0.3422	0.566764	-0.013	0.909
Tb927.3.4450	Tb927.3.4450	340	-0.3112	1	-0.4227	0.619635	338	-0.3254	0.946494	-0.0896	0.928608	-0.4444	8.8e-06
Tb927.3.4460	Tb927.3.4460	1352	0.0688	1	0.0527	0.938976	173	0.0222	1	0.1656	0.869581	0.3899	3.52e-05
Tb927.3.4470	Tb927.3.4470	516	-0.0358	1	-0.2524	0.628749	201	-0.026	1	-0.1193	0.864868	-0.0185	0.876
Tb927.3.4480	Tb927.3.4480	447	-0.0133	1	-0.0095	0.994622	218	-0.0172	1	0.0887	0.908698	0.0712	0.638
Tb927.3.4490	Tb927.3.4490	1196	0.0603	1	-0.1567	0.756495	419	0.2053	1	0.0451	0.967547	0.0416	0.693
Tb927.3.4500	Tb927.3.4500	518	-0.2962	1	-0.5581	0.568857	1095	-0.3734	0.876187	-0.3508	0.63619	0.0058	0.967
Tb927.3.4510	Tb927.3.4510	773	-0.0706	1	-0.1172	0.835554	167	0.0663	1	0.3327	0.666276	-0.0298	0.785
Tb927.3.4520	Tb927.3.4520	1201	-0.4584	0.322727	-0.5622	0.0982629	#N/A	#N/A	#N/A	#N/A	#N/A	-0.0097	0.942
Tb927.3.4530	Tb927.3.4530	682	-0.0857	1	-0.3538	0.304003	#N/A	#N/A	#N/A	#N/A	#N/A	0.0766	0.548
Tb927.3.4540	Tb927.3.4540	895	0.009	1	-0.1141	0.793942	#N/A	#N/A	#N/A	#N/A	#N/A	0.0805	0.452
Tb927.3.4550	Tb927.3.4550	730	-0.1321	1	-0.2932	0.288884	#N/A	#N/A	#N/A	#N/A	#N/A	0.1259	0.168
Tb927.3.4560	Tb927.3.4560	221	1.1054	0.000116983	2.8167	1.78737e-16	459	1.2676	0.00131536	2.3209	4.52631e-11	0.2508	0.000234
Tb927.3.4570	Tb927.3.4570	691	0.0911	1	-0.2422	0.727405	#N/A	#N/A	#N/A	#N/A	#N/A	0.0545	0.599
Tb927.3.4580	Tb927.3.4580	553	0.106	1	-0.1407	0.833675	449	0.0218	1	0.0829	0.913735	0.031	0.776
Tb927.3.4590	Tb927.3.4590	187	0.5867	0.38061	0.362	0.615505	#N/A	#N/A	#N/A	#N/A	#N/A	-0.5534	1.7e-10
Tb927.3.4600	Tb927.3.4600	954	-0.35	0.789433	-0.5992	0.16065	#N/A	#N/A	#N/A	#N/A	#N/A	-0.3602	1.5e-07
Tb927.3.4610	Tb927.3.4610	681	-0.0116	1	0.0398	0.971233	#N/A	#N/A	#N/A	#N/A	#N/A	-0.1514	0.0295
Tb927.3.4620	Tb927.3.4620	1060	0.0235	1	-0.3739	0.471196	#N/A	#N/A	#N/A	#N/A	#N/A	-0.131	0.0689
Tb927.3.4630	Tb927.3.4630	947	0.5184	0.17847	0.8084	0.00562027	119	-0.1409	1	0.5483	0.234564	-0.1174	0.0683
Tb927.3.4640	Tb927.3.4640	231	0.8974	0.0851893	0.6558	0.312432	#N/A	#N/A	#N/A	#N/A	#N/A	0.3341	0.000183
Tb927.3.4650	Tb927.3.4650	797	-0.1556	1	-0.3169	0.617475	1393	-0.0952	1	-0.1292	0.735279	0.1719	0.166
Tb927.3.4660	Tb927.3.4660	662	0.4692	0.0161843	0.1652	0.625729	218	0.1892	1	0.1661	0.842055	0.1829	0.03
Tb927.3.4670	Tb927.3.4670	227	0.6506	0.559523	0.589	0.498348	160	0.4606	0.434046	0.5753	0.176345	0.1877	0.0283
Tb927.3.4680	Tb927.3.4680	1232	0.1236	1	0.0624	0.908698	910	0.1279	1	0.167	0.728196	0.1531	0.023
Tb927.3.4690	Tb927.3.4690	646	-0.2154	1	-0.5568	0.209028	256	-0.0598	1	-0.5048	0.355959	-0.176	0.0667
Tb927.3.4700.1-p1-CDS1	Tb927.3.4700	604	-0.4448	0.240178	-0.6058	0.0313741	#N/A	#N/A	#N/A	#N/A	#N/A	-0.0469	0.693
Tb927.3.4700.2-p1-CDS1	Tb927.3.4700	603	-0.4456	0.238041	-0.6041	0.0316854	#N/A	#N/A	#N/A	#N/A	#N/A	-0.0469	0.693
Tb927.3.4710	Tb927.3.4710	166	0.4538	0.969565	1.8756	0.00255624	418	0.2086	1	0.4192	0.589435	0.209	0.00592
Tb927.3.4720	Tb927.3.4720	640	0.1326	1	-0.0909	0.926745	285	0.279	0.852424	0.1584	0.804689	-0.0958	0.169
Tb927.3.4730	Tb927.3.4730	639	0.0522	1	-0.1502	0.779175	66	-0.1331	1	0.1555	0.883002	-0.104	0.4
Tb927.3.4740	Tb927.3.4740	1110	-0.1467	1	-0.4992	0.521255	#N/A	#N/A	#N/A	#N/A	#N/A	0.2565	0.028
Tb927.3.4750	Tb927.3.4750	2392	-0.1453	1	-0.4409	0.40387	300	-0.116	1	-0.2832	0.78087	-0.2264	0.00223
Tb927.3.4760	Tb927.3.4760	1109	-0.0462	1	-0.3687	0.547177	1778	-0.073	1	0.0181	0.980818	0.0513	0.566
Tb927.3.4770	Tb927.3.4770	618	0.0445	1	-0.1059	0.849552	#N/A	#N/A	#N/A	#N/A	#N/A	-0.0639	0.644
Tb927.3.4780	Tb927.3.4780	1131	-0.2103	1	-0.474	0.545989	#N/A	#N/A	#N/A	#N/A	#N/A	0.3641	0.00111
Tb927.3.4790	Tb927.3.4790	2398	-0.1532	1	-0.3854	0.490262	#N/A	#N/A	#N/A	#N/A	#N/A	-0.2166	0.00506
Tb927.3.4800	Tb927.3.4800	314	0.196	1	0.3807	0.647643	#N/A	#N/A	#N/A	#N/A	#N/A	0.0463	0.693
Tb927.3.4810.1	Tb927.3.4810	388	-0.1023	1	-0.3869	0.345723	#N/A	#N/A	#N/A	#N/A	#N/A	0.0553	0.717
Tb927.3.4810.2	Tb927.3.4810	388	-0.1012	1	-0.3854	0.349179	#N/A	#N/A	#N/A	#N/A	#N/A	0.0553	0.717
Tb927.3.4820	Tb927.3.4820	420	-0.0048	1	0.3376	0.576382	1021	0.0459	1	0.4432	0.0153289	-0.0021	0.988
Tb927.3.4830	Tb927.3.4830	118	1.1684	0.000332127	1.6194	2.15159e-06	235	0.7598	0.134291	1.0065	0.0200799	0.4223	0.000131
Tb927.3.4840	Tb927.3.4840	1590	0.0371	1	-0.1516	0.798235	#N/A	#N/A	#N/A	#N/A	#N/A	0.0232	0.814
Tb927.3.4850	Tb927.3.4850	1073	0.103	1	-0.0767	0.909674	2099	-0.0462	1	-0.1621	0.818082	0.1419	0.171
Tb927.3.4860	Tb927.3.4860	154	-0.0422	1	-0.2844	0.674843	#N/A	#N/A	#N/A	#N/A	#N/A	-0.2244	0.045
Tb927.3.4870.1	Tb927.3.4870	708	0.1524	1	0.1102	0.835442	#N/A	#N/A	#N/A	#N/A	#N/A	0.3226	0.0017
Tb927.3.4870.2	Tb927.3.4870	710	0.1502	1	0.1068	0.842055	#N/A	#N/A	#N/A	#N/A	#N/A	0.3226	0.0017
Tb927.3.4880	Tb927.3.4880	690	-0.2642	0.93723	-0.164	0.81351	#N/A	#N/A	#N/A	#N/A	#N/A	-0.2013	0.0437
Tb927.3.4890	Tb927.3.4890	331	-0.2692	1	-0.4364	0.522074	#N/A	#N/A	#N/A	#N/A	#N/A	0.2093	0.127
Tb927.3.4900	Tb927.3.4900	1749	-0.1135	1	-0.1408	0.629204	54	0.0461	1	-0.315	0.730103	-0.0193	0.878
Tb927.3.4910	Tb927.3.4910	1625	-0.015	1	0.1472	0.675273	300	0.0843	1	0.077	0.905828	0.0418	0.669
Tb927.3.4920	Tb927.3.4920	1648	-0.0399	1	-0.1141	0.834684	863	-0.0233	1	-0.0024	1	0.0646	0.527
Tb927.3.4930	Tb927.3.4930	1056	-0.0995	1	-0.156	0.711523	131	-0.3845	0.532984	-0.4257	0.249645	-0.1507	0.298
Tb927.3.4940	Tb927.3.4940	816	0.1499	1	0.0978	0.921516	1765	0.3753	0.282867	0.5653	0.0172075	0.0881	0.327
Tb927.3.4950	Tb927.3.4950	2433	-0.0737	1	-0.1763	0.695244	#N/A	#N/A	#N/A	#N/A	#N/A	0.1262	0.182
Tb927.3.4960	Tb927.3.4960	1307	0.1101	1	-0.2233	0.821957	881	0.1941	1	0.304	0.533198	0.1982	0.0614
Tb927.3.4970	Tb927.3.4970	1544	-0.0935	1	-0.3162	0.576562	359	-0.2241	0.975469	-0.1831	0.750894	-0.0116	0.91
Tb927.3.4980	Tb927.3.4980	1416	0.2454	1	0.2255	0.80787	91	0.2227	1	0.2279	0.771966	0.1244	0.156
Tb927.3.4990	Tb927.3.4990	1297	-0.0994	1	-0.3312	0.435659	696	-0.0147	1	-0.296	0.540382	0.3591	0.00118
Tb927.3.5000	Tb927.3.5000	1722	-0.0795	1	-0.208	0.649298	261	-0.0673	1	-0.1128	0.873429	0.1151	0.318
Tb927.3.5010	Tb927.3.5010	1039	-0.1306	1	-0.2616	0.557264	1776	-0.1561	1	-0.0847	0.865973	-0.1322	0.182
Tb927.3.5020	Tb927.3.5020	2247	0.1305	1	-0.2192	0.756263	362	0.0033	1	-0.0264	0.982686	-0.0537	0.533
Tb927.3.5030	Tb927.3.5030	1771	0.0528	1	-0.1085	0.844011	#N/A	#N/A	#N/A	#N/A	#N/A	0.2497	0.00389
Tb927.3.5040	Tb927.3.5040	1837	0.1014	1	0.1227	0.685194	#N/A	#N/A	#N/A	#N/A	#N/A	0.0748	0.392
Tb927.3.5050	Tb927.3.5050	78203	-0.2211	0.586872	-0.3328	0.108954	10261	-0.2301	0.824113	-0.3401	0.296347	-0.1582	0.00701
Tb927.3.5060	Tb927.3.5060	1853	0.2417	0.422069	0.2669	0.234824	1622	0.233	0.754528	0.2568	0.453407	-0.1586	0.0376
Tb927.3.5070	Tb927.3.5070	1395	0.0237	1	-0.0424	0.939691	769	0.0102	1	0.1163	0.84902	0.1432	0.0799
Tb927.3.5080	Tb927.3.5080	161	1.1169	0.13805	1.5687	0.00971753	344	0.4141	0.956936	0.478	0.607315	0.3848	8.09e-07
Tb927.3.5090	Tb927.3.5090	851	0.0089	1	0.1177	0.864244	#N/A	#N/A	#N/A	#N/A	#N/A	0.1738	0.104
Tb927.3.5100	Tb927.3.5100	2200	-0.0396	1	-0.2443	0.694361	#N/A	#N/A	#N/A	#N/A	#N/A	-0.052	0.562
Tb927.3.5110	Tb927.3.5110	1052	-0.1704	0.860552	-0.3349	0.136382	#N/A	#N/A	#N/A	#N/A	#N/A	-0.116	0.218
Tb927.3.5120	Tb927.3.5120	656	-0.1852	1	-0.4865	0.17393	209	-0.2775	1	-0.4519	0.466452	-0.1534	0.0746
Tb927.3.5130	Tb927.3.5130	745	-0.1751	1	-0.1921	0.760675	735	-0.4945	0.219592	-0.2241	0.677731	-0.4392	2.78e-05
Tb927.3.5140	Tb927.3.5140	245	0.5218	0.805948	0.456	0.666731	242	0.3695	0.818527	1.0225	0.0108888	0.039	0.689
Tb927.3.5150	Tb927.3.5150	1005	0.1184	1	0.1822	0.733052	439	0.0352	1	0.2186	0.631093	0.0415	0.716
Tb927.3.5160	Tb927.3.5160	910	0.0536	1	0.1463	0.801274	277	-0.1288	1	-0.3186	0.591587	-0.1633	0.0246
Tb927.3.5170	Tb927.3.5170	1477	0.0388	1	-0.2665	0.573406	587	0.045	1	-0.1312	0.84668	0.2204	0.0175
Tb927.3.5180	Tb927.3.5180	1464	0.1034	1	0.4017	0.550957	1705	0.0665	1	0.331	0.650237	-0.1226	0.202
Tb927.3.5190	Tb927.3.5190	474	0.0492	1	0.9227	0.0363195	450	-0.0021	1	0.259	0.63999	0.6038	3.46e-12
Tb927.3.5200	Tb927.3.5200	1331	0.0814	1	0.2034	0.623874	642	0.0803	1	0.1067	0.827219	0.2655	0.00216
Tb927.3.5210	Tb927.3.5210	284	1.257	0.00848032	2.0995	1.22371e-06	354	0.627	0.438214	1.1692	0.0102155	0.4494	6.12e-06
Tb927.3.5220	Tb927.3.5220	462	0.5175	0.198858	0.5147	0.169732	#N/A	#N/A	#N/A	#N/A	#N/A	0.1355	0.0859
Tb927.3.5230	Tb927.3.5230	1204	0.1314	1	-0.0685	0.903201	676	0.1278	1	0.0095	0.994622	-0.0396	0.736
Tb927.3.5240	Tb927.3.5240	1335	-0.1932	0.997956	-0.3111	0.462944	348	-0.326	0.784852	-0.373	0.44601	-0.0406	0.693
Tb927.3.5250	Tb927.3.5250	200	3.7128	1.34698e-30	4.2287	2.27282e-22	199	3.0203	3.53668e-11	3.0734	1.04848e-10	-0.1129	0.195
Tb927.3.5260	Tb927.3.5260	635	0.1386	1	0.3892	0.394646	196	-0.1156	1	-0.0348	0.964814	-0.082	0.407
Tb927.3.5270	Tb927.3.5270	975	-0.1864	0.734692	-0.1596	0.593564	535	-0.2067	1	-0.0329	0.971173	-0.1348	0.272
Tb927.3.5280	Tb927.3.5280	1494	-0.0102	1	-0.0802	0.865546	432	0.0439	1	-0.0184	0.985164	0.0404	0.717
Tb927.3.5290	Tb927.3.5290	2021	0.0629	1	-0.1046	0.87197	#N/A	#N/A	#N/A	#N/A	#N/A	-0.0496	0.608
Tb927.3.5300	Tb927.3.5300	1963	-0.0669	1	-0.1173	0.821876	286	-0.1434	1	-0.1787	0.819877	0.2886	0.00821
Tb927.3.5310	Tb927.3.5310	384	-0.2688	1	0.4553	0.547109	73	-1.1522	0.111635	-0.5383	0.611983	-0.1658	0.00827
Tb927.3.5320	Tb927.3.5320	1413	-0.0875	1	-0.2464	0.442653	577	0.032	1	0.0555	0.939691	-0.0467	0.693
Tb927.3.5330	Tb927.3.5330	855	0.0321	1	0.1036	0.869347	319	-0.0486	1	0.0956	0.873429	0.0747	0.535
Tb927.3.5340	Tb927.3.5340	4711	-0.0226	1	-0.0034	1	1136	-0.0249	1	0.1109	0.842914	0.1043	0.238
Tb927.3.5350	Tb927.3.5350	546	-0.0655	1	0.0254	0.987052	1914	-0.0779	1	-0.1087	0.798914	-0.3406	0.000126
Tb927.3.5360	Tb927.3.5360	801	-0.1356	1	0.1785	0.806904	#N/A	#N/A	#N/A	#N/A	#N/A	0.0336	0.795
Tb927.3.5370	Tb927.3.5370	1194	-0.0624	1	-0.2955	0.706315	1302	-0.0544	1	0.0801	0.868961	-0.1457	0.0944
Tb927.3.5380	Tb927.3.5380	599	0.1697	1	0.0842	0.942471	224	0.0372	1	0.3909	0.641949	0.3112	7.05e-05
Tb927.3.5390	Tb927.3.5390	202	0.3546	1	0.1628	0.911696	408	0.3552	0.807173	0.5516	0.261478	0.4123	1.33e-07
Tb927.3.5400	Tb927.3.5400	1088	-0.1246	1	-0.0763	0.918765	256	0.0635	1	0.3483	0.567533	-0.0771	0.478
Tb927.3.5410	Tb927.3.5410	849	-0.4255	0.125116	-0.2728	0.421643	#N/A	#N/A	#N/A	#N/A	#N/A	0.2638	0.0667
Tb927.3.5420	Tb927.3.5420	625	0.2156	1	0.1737	0.810164	#N/A	#N/A	#N/A	#N/A	#N/A	0.2759	3.68e-05
Tb927.3.5430	Tb927.3.5430	930	-0.6227	0.0897942	-0.5152	0.183381	#N/A	#N/A	#N/A	#N/A	#N/A	-0.1052	0.321
Tb927.3.5440	Tb927.3.5440	2001	-0.134	1	-0.3541	0.175885	214	-0.1678	1	-0.047	0.964346	-0.039	0.631
Tb927.3.5450	Tb927.3.5450	629	-0.1099	1	-0.4643	0.257386	291	0.0024	1	-0.4038	0.47755	0.0223	0.826
Tb927.3.5460	Tb927.3.5460	1043	-0.0843	1	-0.4235	0.235485	156	0.0063	1	-0.388	0.565608	-0.0432	0.692
Tb927.3.5470	Tb927.3.5470	502	-0.0975	1	0.0015	1	513	-0.0418	1	-0.0279	0.961035	-0.0491	0.772
Tb927.3.5480	Tb927.3.5480	518	-0.0026	1	-0.4958	0.182331	145	-0.0153	1	-0.2317	0.590063	0.1483	0.144
Tb927.3.5490	Tb927.3.5490	1810	0.1349	1	0.3533	0.375276	760	0.1258	1	0.349	0.347634	0.1442	0.0351
Tb927.3.5500	Tb927.3.5500	3066	0.0401	1	-0.1732	0.798504	#N/A	#N/A	#N/A	#N/A	#N/A	-0.0069	0.949
Tb927.3.5510	Tb927.3.5510	1046	-0.1281	1	-0.4067	0.222078	#N/A	#N/A	#N/A	#N/A	#N/A	-0.0104	0.921
Tb927.3.5520	Tb927.3.5520	3622	0.0295	1	-0.0005	1	#N/A	#N/A	#N/A	#N/A	#N/A	0.1655	0.00734
Tb927.3.5530	Tb927.3.5530	794	-0.0308	1	-0.382	0.604398	481	-0.0999	1	-0.1767	0.859561	-0.4366	8.74e-15
Tb927.3.5540	Tb927.3.5540	954	0.0992	1	-0.3748	0.306285	368	-0.0173	1	-0.0545	0.920943	-0.221	0.00314
Tb927.3.5550	Tb927.3.5550	1112	0.0719	1	0.1502	0.847368	1574	0.0272	1	0.1889	0.757761	0.0344	0.744
Tb927.3.5560	Tb927.3.5560	808	0.4219	0.685828	0.5611	0.262602	742	0.3084	0.872491	0.5768	0.169649	0.3533	0.00343
Tb927.3.5570	Tb927.3.5570	761	-0.0474	1	-0.0619	0.934897	399	-0.1661	1	0.0771	0.887399	0.182	0.0929
Tb927.3.5580	Tb927.3.5580	2803	0.0131	1	0.1229	0.730103	551	0.0945	1	-0.0544	0.929319	-0.1487	0.0912
Tb927.3.5590	Tb927.3.5590	1645	-0.0786	1	-0.2746	0.542859	#N/A	#N/A	#N/A	#N/A	#N/A	0.1319	0.135
Tb927.3.5600	Tb927.3.5600	1583	-0.1576	0.972946	-0.3203	0.233585	351	-0.1439	1	-0.2934	0.478051	0.3157	0.00173
Tb927.3.5610	Tb927.3.5610	1906	-0.0332	1	-0.113	0.75445	#N/A	#N/A	#N/A	#N/A	#N/A	0.3194	0.000444
Tb927.3.5620	Tb927.3.5620	1491	-0.0563	1	-0.3059	0.627612	1395	-0.0978	1	-0.0809	0.897095	-0.0481	0.585
Tb927.3.5630	Tb927.3.5630	1328	-0.0235	1	-0.051	0.90712	169	-0.0722	1	0.0622	0.924738	0.0539	0.68
Tb927.3.5640	Tb927.3.5640	1960	-0.0162	1	-0.3306	0.49939	#N/A	#N/A	#N/A	#N/A	#N/A	-0.002	0.987
Tb927.3.5650	Tb927.3.5650	528	0.0285	1	0.0385	0.98071	332	0.4505	0.664628	0.5476	0.3359	0.3682	5.92e-06
Tb927.3.5660	Tb927.3.5660	102	-1.1958	0.181528	-1.3605	0.17932	80	-1.3519	0.0029583	-1.2591	0.0209643	-1.1933	2.36e-39
Tb927.3.5670	Tb927.3.5670	5	-1.6439	0.59479	-2.9339	0.366861	#N/A	#N/A	#N/A	#N/A	#N/A	-0.7943	3.75e-06
Tb927.3.5680	Tb927.3.5680	0	#VALUE!	NA	#VALUE!	NA	#N/A	#N/A	#N/A	#N/A	#N/A	-0.9966	0.114
Tb927.3.5690	Tb927.3.5690	6	-0.504	1	0.7214	0.836454	#N/A	#N/A	#N/A	#N/A	#N/A	-0.734	5.09e-05
Tb927.3.5700	Tb927.3.5700	0	#VALUE!	NA	#VALUE!	NA	#N/A	#N/A	#N/A	#N/A	#N/A	0	0
Tb927.3.5710	Tb927.3.5710	0	#VALUE!	NA	#VALUE!	NA	#N/A	#N/A	#N/A	#N/A	#N/A	0	0
Tb927.3.5720	Tb927.3.5720	0	#VALUE!	NA	#VALUE!	NA	#N/A	#N/A	#N/A	#N/A	#N/A	0	0
Tb927.3.5730	Tb927.3.5730	0	#VALUE!	NA	#VALUE!	NA	#N/A	#N/A	#N/A	#N/A	#N/A	0	0
Tb927.3.5740	Tb927.3.5740	24	0.24	1	0.1333	0.93727	#N/A	#N/A	#N/A	#N/A	#N/A	0.2472	0.288
Tb927.3.5750	Tb927.3.5750	15	-0.4755	1	-0.6337	0.742008	#N/A	#N/A	#N/A	#N/A	#N/A	-0.346	0.0811
Tb927.3.5760	Tb927.3.5760	0	-1.1442	NA	0	NA	1	2.3249	0.986102	3.0273	0.570486	0	0
Tb927.3.5770	Tb927.3.5770	1	-1.3335	1	-0.1612	0.98885	21	-0.4734	0.955342	0.1674	0.92227	-0.5367	0.264
Tb927.3.5780	Tb927.3.5780	5	-0.9926	0.859485	-2.0481	0.55719	#N/A	#N/A	#N/A	#N/A	#N/A	0.2828	0.125
Tb927.3.5790	Tb927.3.5790	91	-0.4565	1	-1.896	0.137639	#N/A	#N/A	#N/A	#N/A	#N/A	-0.3708	0.0227
Tb927.3.5800	Tb927.3.5800	2	-1.8648	0.833539	-1.683	0.694691	#N/A	#N/A	#N/A	#N/A	#N/A	0.1829	0.176
Tb927.3.5810	Tb927.3.5810	5	-0.2446	1	0.8928	0.836714	#N/A	#N/A	#N/A	#N/A	#N/A	-0.3211	0.00334
Tb927.3.5820	Tb927.3.5820	3	-0.8228	1	1.5539	0.681113	#N/A	#N/A	#N/A	#N/A	#N/A	0.2505	0.00693
Tb927.3.5830	Tb927.3.5830	2	-0.07	1	0.7312	0.898556	#N/A	#N/A	#N/A	#N/A	#N/A	-0.0893	0.517
Tb927.3.5850	Tb927.3.5850	1	-0.9926	1	-3.1064	0.581408	0	#VALUE!	NA	#VALUE!	NA	-0.728	NA
Tb927.3.5860	Tb927.3.5860	1	-0.6502	1	-1.0651	0.880715	0	0	NA	-1.123	NA	0.525	NA
Tb927.3.5870	Tb927.3.5870	0	0.7793	NA	0.8005	NA	#N/A	#N/A	#N/A	#N/A	#N/A	-2.4419	NA
Tb927.3.5880	Tb927.3.5880	0	2.2966	1	0	1	#N/A	#N/A	#N/A	#N/A	#N/A	-0.2884	NA
Tb927.3.5890	Tb927.3.5890	0	-0.1824	NA	0	NA	0	#VALUE!	NA	#VALUE!	NA	0	0
Tb927.3.5900	Tb927.3.5900	0	-0.1824	NA	0	NA	0	#VALUE!	NA	#VALUE!	NA	-0.0742	NA
Tb927.4.100	Tb927.4.100	1337	-0.4019	0.669971	-0.4696	0.368128	226	-0.3733	0.894214	0.044	0.972916	-0.3247	7.46e-06
Tb927.4.110	Tb927.4.110	209	-0.2166	0.994489	-0.6813	0.14175	#N/A	#N/A	#N/A	#N/A	#N/A	-0.1775	0.122
Tb927.4.120	Tb927.4.120	115	-0.4795	0.764066	-0.3709	0.674354	246	-0.3122	0.811105	-0.0788	0.918601	-0.03	0.845
Tb927.4.130	Tb927.4.130	59	0.8282	0.06826	0.498	0.504514	#N/A	#N/A	#N/A	#N/A	#N/A	-0.2125	0.0174
Tb927.4.140	Tb927.4.140	2	0.0615	1	-1.123	0.849573	#N/A	#N/A	#N/A	#N/A	#N/A	-0.3425	0.32
Tb927.4.150	Tb927.4.150	34	-0.1535	1	0.2529	0.802112	45	-0.3744	1	-0.1352	0.938213	-0.1413	0.548
Tb927.4.160	Tb927.4.160	103	-0.0468	1	-0.07	0.962431	#N/A	#N/A	#N/A	#N/A	#N/A	-0.4597	5.18e-07
Tb927.4.170	Tb927.4.170	4	-1.381	0.732567	-2.0218	0.405189	3	-1.6799	0.780583	-1.2196	0.741853	-1.9	0.0693
Tb927.4.180	Tb927.4.180	44	-0.8092	0.700518	-0.7053	0.632063	37	-1.1441	0.155071	-0.4703	0.724302	-0.6924	3.92e-07
Tb927.4.190	Tb927.4.190	11	-0.0951	1	-0.7109	0.757424	622	0.0306	1	0.2847	0.727405	-0.3503	0.137
Tb927.4.200	Tb927.4.200	422	0.037	1	0.189	0.873429	163	-0.1177	1	0.7366	0.338472	-0.2268	0.00398
Tb927.4.210	Tb927.4.210	353	-0.5542	0.270073	-0.6543	0.129825	254	-0.7641	0.105409	-0.5829	0.274264	0.0662	0.595
Tb927.4.220	Tb927.4.220	52	-0.4328	0.835938	-1.4993	0.130682	#N/A	#N/A	#N/A	#N/A	#N/A	0.0449	0.79
Tb927.4.230	Tb927.4.230	425	-0.7831	0.120919	-0.4933	0.437915	137	-1.1276	0.00840278	-0.9853	0.0430651	0.1765	0.0509
Tb927.4.240	Tb927.4.240	62	-0.6576	0.219484	-0.0883	0.94811	#N/A	#N/A	#N/A	#N/A	#N/A	-0.3488	0.0334
Tb927.4.250	Tb927.4.250	138	-0.7278	0.0755986	-0.9861	0.0379259	#N/A	#N/A	#N/A	#N/A	#N/A	0.0613	0.615
Tb927.4.260	Tb927.4.260	11	-0.0535	1	0.0967	0.975862	#N/A	#N/A	#N/A	#N/A	#N/A	-0.1002	0.56
Tb927.4.270	Tb927.4.270	9	-0.3249	1	1.3686	0.691963	#N/A	#N/A	#N/A	#N/A	#N/A	-0.0601	0.751
Tb927.4.280	Tb927.4.280	7	-0.1469	1	-0.3623	0.924738	#N/A	#N/A	#N/A	#N/A	#N/A	-0.0022	0.993
Tb927.4.290	Tb927.4.290	7	-0.1354	1	-0.1039	0.98236	#N/A	#N/A	#N/A	#N/A	#N/A	0.0186	0.938
Tb927.4.300	Tb927.4.300	18	0.1417	1	0.6443	0.856879	#N/A	#N/A	#N/A	#N/A	#N/A	0.2566	0.103
Tb927.4.310	Tb927.4.310	1075	-0.5014	0.707857	-0.8473	0.111234	#N/A	#N/A	#N/A	#N/A	#N/A	-0.3876	2.53e-12
Tb927.4.320	Tb927.4.320	1804	-0.3224	0.193078	-0.3853	0.0553107	648	-0.2954	0.678196	-0.2704	0.51892	-0.2908	0.000562
Tb927.4.330	Tb927.4.330	1346	-0.6416	0.0224187	-0.6836	0.00878036	#N/A	#N/A	#N/A	#N/A	#N/A	-0.2578	0.0196
Tb927.4.340	Tb927.4.340	414	-0.4876	0.183265	-0.5759	0.0529384	#N/A	#N/A	#N/A	#N/A	#N/A	-0.2045	0.114
Tb927.4.350	Tb927.4.350	339	-0.465	0.734174	-0.8448	0.0956933	258	-0.5098	0.107172	-0.588	0.0336991	-0.201	0.0395
Tb927.4.360	Tb927.4.360	1170	-0.2023	1	-0.0531	0.964985	580	-0.2265	1	-0.129	0.885627	-0.7164	8.85e-15
Tb927.4.370	Tb927.4.370	274	-0.3177	0.781542	-0.3271	0.540178	417	-0.4181	0.80616	-0.2726	0.73726	-0.274	0.0802
Tb927.4.380	Tb927.4.380	220	-0.1335	1	0.1559	0.870646	168	-0.1856	1	0.2998	0.721676	-0.3167	0.0106
Tb927.4.390	Tb927.4.390	330	-0.7252	0.0815854	-0.5716	0.21341	175	-1.1956	5.99092e-07	-1.0826	1.87955e-05	-0.1667	0.456
Tb927.4.400	Tb927.4.400	606	-0.4617	0.872491	-0.6397	0.414281	#N/A	#N/A	#N/A	#N/A	#N/A	-0.1801	0.0374
Tb927.4.410	Tb927.4.410	856	-0.4247	0.105537	-0.4634	0.0523033	481	-0.5459	0.00479998	-0.4045	0.0641339	-0.5296	7.36e-10
Tb927.4.420	Tb927.4.420	418	-0.4127	0.838806	-0.649	0.303835	54	-0.5741	0.582197	-0.4596	0.58928	-0.5187	1.39e-18
Tb927.4.440	Tb927.4.440	334	-0.2982	1	-0.2628	0.83409	517	-0.2477	1	-0.1065	0.912622	-0.0023	0.991
Tb927.4.450	Tb927.4.450	847	-0.404	0.9943	-0.8547	0.258505	#N/A	#N/A	#N/A	#N/A	#N/A	-0.6608	3.21e-29
Tb927.4.460	Tb927.4.460	1341	-0.4964	0.0704558	-0.5916	0.0111828	#N/A	#N/A	#N/A	#N/A	#N/A	-0.3561	0.000332
Tb927.4.470	Tb927.4.470	1115	-0.4917	0.259268	-0.4518	0.261478	639	-0.5018	0.173756	-0.4361	0.224214	-0.7637	4.16e-10
Tb927.4.480	Tb927.4.480	1187	-0.5165	0.049624	-0.5545	0.0186541	#N/A	#N/A	#N/A	#N/A	#N/A	-0.5811	4.76e-09
Tb927.4.490	Tb927.4.490	622	-0.3523	0.778973	-0.5894	0.169464	#N/A	#N/A	#N/A	#N/A	#N/A	-0.4593	3.29e-09
Tb927.4.500	Tb927.4.500	273	0.0997	1	-0.2932	0.798686	173	0.0412	1	-0.2949	0.702622	-0.2069	0.0421
Tb927.4.510	Tb927.4.510	491	-0.5206	0.105855	-0.5506	0.050725	417	-0.5198	0.212734	-0.4427	0.268679	-0.1779	0.358
Tb927.4.520	Tb927.4.520	1029	-0.2889	0.9334	-0.2216	0.747678	#N/A	#N/A	#N/A	#N/A	#N/A	-0.2688	0.0126
Tb927.4.530	Tb927.4.530	1027	-0.3192	0.257478	-0.2733	0.331101	#N/A	#N/A	#N/A	#N/A	#N/A	-0.3789	1.08e-06
Tb927.4.540	Tb927.4.540	600	-0.4722	0.240178	-0.3313	0.476914	#N/A	#N/A	#N/A	#N/A	#N/A	-0.0295	0.794
Tb927.4.550	Tb927.4.550	622	-0.3452	0.808085	-0.1516	0.840053	341	-0.4088	0.574667	-0.139	0.846782	-0.47	0.000701
Tb927.4.560	Tb927.4.560	1515	-0.5121	0.641892	-0.2096	0.819877	#N/A	#N/A	#N/A	#N/A	#N/A	-0.206	0.000614
Tb927.4.570	Tb927.4.570	727	-0.2943	0.758427	-0.4783	0.167715	#N/A	#N/A	#N/A	#N/A	#N/A	-0.4212	3.06e-05
Tb927.4.580	Tb927.4.580	716	-0.2987	0.69104	-0.4311	0.209858	115	-0.0721	1	-0.1902	0.729029	-0.2848	0.00609
Tb927.4.590	Tb927.4.590	2690	-0.6859	0.00434917	-0.4581	0.106377	837	-0.6603	0.0102243	-0.4989	0.0828111	-0.699	4.16e-29
Tb927.4.600	Tb927.4.600	1568	-0.5178	0.0133132	-0.6118	0.0013343	#N/A	#N/A	#N/A	#N/A	#N/A	-0.2106	0.0214
Tb927.4.610	Tb927.4.610	525	-0.4548	0.0823099	-0.656	0.00268084	560	-0.478	0.565246	-0.5241	0.327813	-0.4234	1.1e-07
Tb927.4.620	Tb927.4.620	990	-0.5866	0.358228	-0.7856	0.0749624	130	-0.7218	0.28362	-0.7247	0.198149	-0.6144	2.22e-27
Tb927.4.630	Tb927.4.630	981	-0.4534	0.0229578	-0.4733	0.0122473	#N/A	#N/A	#N/A	#N/A	#N/A	-0.1472	0.207
Tb927.4.640	Tb927.4.640	924	-0.5928	0.00206462	-0.5448	0.00499483	209	-0.6936	0.0418446	-0.5804	0.08623	-0.3694	3.97e-05
Tb927.4.650	Tb927.4.650	879	-0.435	0.264784	-0.6192	0.026384	#N/A	#N/A	#N/A	#N/A	#N/A	-0.3716	0.000239
Tb927.4.660	Tb927.4.660	1977	-0.4283	0.347086	-0.6515	0.026706	#N/A	#N/A	#N/A	#N/A	#N/A	-0.5942	2.56e-17
Tb927.4.670	Tb927.4.670	712	-0.5931	0.268742	-0.6357	0.165534	1469	-0.5598	0.0272632	-0.4393	0.105037	-0.4277	4.72e-08
Tb927.4.680	Tb927.4.680	602	-0.5389	0.0210299	-0.6351	0.00210138	49	-0.2655	1	-0.1498	0.900465	-0.4434	0.00024
Tb927.4.690	Tb927.4.690	547	-0.6833	0.000362013	-0.6661	0.00051383	#N/A	#N/A	#N/A	#N/A	#N/A	-0.5405	1.35e-06
Tb927.4.700	Tb927.4.700	681	-0.2684	0.807534	-0.2525	0.583525	182	-0.3912	0.685586	-0.3246	0.571784	-0.609	8.05e-09
Tb927.4.710	Tb927.4.710	29	2.0142	0.00186537	1.5305	0.0939662	#N/A	#N/A	#N/A	#N/A	#N/A	-0.6645	7.11e-14
Tb927.4.720	Tb927.4.720	729	-0.5175	0.0939898	-0.4459	0.150095	1923	-0.5144	0.0599023	-0.4648	0.0817362	-0.3362	0.0423
Tb927.4.730	Tb927.4.730	982	-0.4424	0.340936	-0.6653	0.0277402	#N/A	#N/A	#N/A	#N/A	#N/A	-0.3742	0.000104
Tb927.4.740	Tb927.4.740	3309	-0.4278	0.300734	-0.5114	0.101694	596	-0.6066	0.0165819	-0.5694	0.0192088	-0.3281	8.02e-06
Tb927.4.750	Tb927.4.750	815	-0.411	0.773125	-0.375	0.584696	347	-0.4905	0.731162	-0.2407	0.800316	-0.567	1.76e-08
Tb927.4.760	Tb927.4.760	1999	-0.3065	0.13805	-0.3464	0.0518819	#N/A	#N/A	#N/A	#N/A	#N/A	-0.3465	3.67e-08
Tb927.4.770	Tb927.4.770	1135	-0.2669	0.997057	-0.2188	0.768198	478	-0.4589	0.101707	-0.1502	0.73726	-0.2982	7.2e-06
Tb927.4.780	Tb927.4.780	232	-0.2347	1	0.1681	0.819876	117	-0.2726	1	-0.1175	0.900082	-0.2624	0.132
Tb927.4.790	Tb927.4.790	264	-0.106	1	0.1065	0.912936	60	-0.2912	1	0.1808	0.888228	-0.2847	0.0272
Tb927.4.800	Tb927.4.800	705	-0.4435	0.928141	-0.3003	0.785396	635	-0.178	1	-0.0849	0.886272	-0.3921	3.88e-12
Tb927.4.810	Tb927.4.810	511	-0.4304	0.668096	-0.6472	0.164622	221	-0.4043	0.400146	-0.4407	0.229886	-0.3393	1.23e-05
Tb927.4.820	Tb927.4.820	674	-0.476	0.230649	-0.7892	0.00381222	258	-0.5617	0.266445	-0.5597	0.187275	-0.4822	3.65e-07
Tb927.4.830	Tb927.4.830	261	-0.7929	0.103562	-0.8933	0.0359726	#N/A	#N/A	#N/A	#N/A	#N/A	-0.2628	0.182
Tb927.4.840	Tb927.4.840	867	-0.582	0.162404	-0.8783	0.00461213	704	-0.5409	0.12827	-0.7172	0.0104488	-0.3119	0.000281
Tb927.4.850	Tb927.4.850	699	-0.4126	0.112769	-0.5297	0.0120174	431	-0.4205	0.366064	-0.4824	0.150904	-0.2464	0.114
Tb927.4.860	Tb927.4.860	960	-0.4987	0.198858	-0.7382	0.00934872	561	-0.5427	0.154565	-0.6741	0.0260928	-0.0766	0.559
Tb927.4.870	Tb927.4.870	1050	-0.4255	0.895129	-0.6725	0.336547	616	-0.4906	0.835531	-0.4487	0.615188	-0.7156	2.93e-42
Tb927.4.880	Tb927.4.880	1008	-0.4361	0.192246	-0.7281	0.00190057	206	-0.4441	0.773125	-0.6031	0.297989	-0.3435	1.4e-05
Tb927.4.890	Tb927.4.890	541	-0.4844	0.0106544	-0.4443	0.022498	1798	-0.5119	0.00366474	-0.5091	0.00288294	-0.3272	0.00307
Tb927.4.900	Tb927.4.900	710	-0.3903	0.28362	-0.6598	0.00569112	838	-0.3592	0.495193	-0.5217	0.0827876	-0.2976	0.0123
Tb927.4.910.1	Tb927.4.910	755	-0.558	0.0194961	-0.5523	0.0175933	242	-0.4661	0.144931	-0.4793	0.0937509	-0.1784	0.147
Tb927.4.910.2	Tb927.4.910	757	-0.5575	0.018956	-0.553	0.0169296	242	-0.4661	0.144931	-0.4793	0.0937509	-0.1784	0.147
Tb927.4.920	Tb927.4.920	1179	-0.4746	0.0165819	-0.4189	0.0381018	#N/A	#N/A	#N/A	#N/A	#N/A	-0.4002	1.66e-05
Tb927.4.930	Tb927.4.930	1445	-0.4305	0.308551	-0.5152	0.10217	291	-0.5451	0.208335	-0.4685	0.246443	-0.3173	0.00307
Tb927.4.940	Tb927.4.940	1082	-0.4575	0.0961881	-0.4484	0.0793931	219	-0.6316	0.0686113	-0.3384	0.452075	-0.4755	9.84e-06
Tb927.4.950	Tb927.4.950	1324	-0.6131	0.00628558	-0.6652	0.00143675	#N/A	#N/A	#N/A	#N/A	#N/A	-0.4467	5.33e-05
Tb927.4.960	Tb927.4.960	1175	-0.3509	0.870225	-0.677	0.145006	#N/A	#N/A	#N/A	#N/A	#N/A	-0.2954	0.000194
Tb927.4.970	Tb927.4.970	924	-0.6411	0.216965	-0.838	0.0311877	#N/A	#N/A	#N/A	#N/A	#N/A	-0.626	0.000503
Tb927.4.980	Tb927.4.980	1213	-0.5175	0.198616	-0.7581	0.00998916	563	-0.4156	0.642239	-0.669	0.0946412	-0.5477	4.75e-07
Tb927.4.990	Tb927.4.990	1349	-0.3908	0.197472	-0.4344	0.0816383	253	-0.5738	0.177975	-0.5008	0.18952	-0.5349	5.95e-08
Tb927.4.1000	Tb927.4.1000	174	0.9261	0.000947176	3.3015	2.392e-24	1779	0.6392	0.0258605	0.1987	0.689746	0.561	1.25e-09
Tb927.4.1010	Tb927.4.1010	710	-0.0075	1	0.1964	0.787405	#N/A	#N/A	#N/A	#N/A	#N/A	0.2925	0.0228
Tb927.4.1020	Tb927.4.1020	2130	0.0316	1	0.03	0.962938	#N/A	#N/A	#N/A	#N/A	#N/A	0.2146	0.0021
Tb927.4.1030	Tb927.4.1030	777	0.0133	1	-0.0832	0.889525	#N/A	#N/A	#N/A	#N/A	#N/A	0.0984	0.524
Tb927.4.1040	Tb927.4.1040	739	0.2758	0.818527	0.3575	0.396808	428	0.1397	1	0.3028	0.590063	0.161	0.163
Tb927.4.1050	Tb927.4.1050	1769	-0.0867	1	-0.2563	0.518996	259	-0.0715	1	-0.1527	0.797508	0.1814	0.0546
Tb927.4.1060	Tb927.4.1060	1467	-0.1189	1	-0.3623	0.388212	#N/A	#N/A	#N/A	#N/A	#N/A	0.2357	0.0021
Tb927.4.1070	Tb927.4.1070	1368	0.0742	1	0.0468	0.938711	358	-0.0038	1	0.2125	0.697727	0.3116	0.0135
Tb927.4.1080	Tb927.4.1080	1913	0.1398	1	-0.2271	0.701395	#N/A	#N/A	#N/A	#N/A	#N/A	0.009	0.92
Tb927.4.1090	Tb927.4.1090	1175	-0.038	1	-0.1227	0.851099	377	-0.1147	1	-0.0502	0.960061	0.0724	0.421
Tb927.4.1100	Tb927.4.1100	24756	-0.3253	0.753128	-0.3705	0.430255	7002	-0.3614	0.789515	-0.3366	0.576289	-0.2213	0.0139
Tb927.4.1110	Tb927.4.1110	933	0.256	0.679378	-0.0172	0.980818	760	0.2016	0.943182	0.1097	0.836714	0.1593	0.0656
Tb927.4.1120	Tb927.4.1120	1926	0.0551	1	-0.089	0.876928	#N/A	#N/A	#N/A	#N/A	#N/A	0.2185	0.00507
Tb927.4.1130	Tb927.4.1130	1222	0.0015	1	-0.1106	0.85588	2169	-0.0052	1	-0.2439	0.71751	0.2702	0.0307
Tb927.4.1140	Tb927.4.1140	1135	-0.0255	1	-0.2566	0.605785	#N/A	#N/A	#N/A	#N/A	#N/A	0.1014	0.242
Tb927.4.1150	Tb927.4.1150	1343	0.2512	0.427082	0.0895	0.810608	#N/A	#N/A	#N/A	#N/A	#N/A	-0.0702	0.424
Tb927.4.1160	Tb927.4.1160	224	0.0466	1	-0.1487	0.895305	#N/A	#N/A	#N/A	#N/A	#N/A	0.1531	0.152
Tb927.4.1170	Tb927.4.1170	1202	0.0579	1	-0.0131	0.987052	#N/A	#N/A	#N/A	#N/A	#N/A	0.1182	0.312
Tb927.4.1180.1	Tb927.4.1180	1113	-0.1591	1	-0.2833	0.41187	#N/A	#N/A	#N/A	#N/A	#N/A	-0.1077	0.379
Tb927.4.1180.2	Tb927.4.1180	1435	-0.1281	1	-0.3081	0.303835	#N/A	#N/A	#N/A	#N/A	#N/A	-0.1077	0.379
Tb927.4.1190	Tb927.4.1190	785	-0.0188	1	0.1319	0.806043	#N/A	#N/A	#N/A	#N/A	#N/A	0.0149	0.919
Tb927.4.1200	Tb927.4.1200	1	-0.2021	1	0.8005	0.918601	0	#VALUE!	NA	#VALUE!	NA	0.3326	0.0178
Tb927.4.1210	Tb927.4.1210	1	1.7236	1	1.072	0.834109	3	1.2811	0.92479	1.1411	0.672953	1.5197	0.501
Tb927.4.1220	Tb927.4.1220	814	0.2848	1	0.7661	0.430691	72	0.156	1	1.1814	0.327348	0.2858	0.000213
Tb927.4.1230	Tb927.4.1230	249	0.4731	0.88852	0.6311	0.467065	#N/A	#N/A	#N/A	#N/A	#N/A	0.1507	0.0772
Tb927.4.1240	Tb927.4.1240	520	0.3499	0.766972	0.6359	0.106947	660	0.343	0.936074	0.5991	0.315158	0.3936	0.000521
Tb927.4.1250	Tb927.4.1250	1331	0.2518	0.895298	0.3554	0.422567	263	0.1	1	0.4776	0.148801	-0.0336	0.724
Tb927.4.1260	Tb927.4.1260	1908	-0.1152	0.998401	-0.2616	0.200166	1012	-0.0807	1	-0.1623	0.713627	0.2016	0.0472
Tb927.4.1270	Tb927.4.1270	2751	0.0517	1	0.0316	0.967163	945	0.0635	1	0.3308	0.483896	-0.0806	0.367
Tb927.4.1280	Tb927.4.1280	3810	0.05	1	-0.077	0.849573	652	-0.0386	1	-0.0235	0.976902	0.197	0.0407
Tb927.4.1290	Tb927.4.1290	562	0.2101	0.934304	0.1008	0.857569	377	0.1134	1	0.0941	0.872119	0.256	0.12
Tb927.4.1300	Tb927.4.1300	4636	0.0606	1	0.0735	0.927998	3129	0.0722	1	0.3293	0.524921	-0.1218	0.0664
Tb927.4.1310	Tb927.4.1310	2727	-0.004	1	-0.1888	0.710145	708	-0.0181	1	-0.1497	0.861911	0.0987	0.276
Tb927.4.1320	Tb927.4.1320	1688	-0.0057	1	-0.1696	0.778846	#N/A	#N/A	#N/A	#N/A	#N/A	0.2611	0.000206
Tb927.4.1330	Tb927.4.1330	1584	0.2771	0.930014	0.2663	0.671621	269	0.3188	0.908411	0.6214	0.202239	0.0176	0.888
Tb927.4.1340	Tb927.4.1340	2815	-0.0782	1	-0.1868	0.73726	1189	-0.1375	1	-0.0953	0.891573	-0.1252	0.0718
Tb927.4.1350	Tb927.4.1350	2183	-0.2513	0.681444	-0.137	0.750148	322	-0.1806	1	-0.1202	0.880691	0.1044	0.278
Tb927.4.1360	Tb927.4.1360	2341	-0.3937	0.384397	-0.0949	0.873429	960	-0.8053	0.030893	-0.3901	0.469737	0.337	0.000212
Tb927.4.1370	Tb927.4.1370	1037	-0.1055	1	-0.0378	0.961035	524	-0.1066	1	-0.127	0.800391	0.0775	0.611
Tb927.4.1380	Tb927.4.1380	861	0.0416	1	0.1004	0.834548	181	0.0127	1	0.0525	0.953222	0.3794	0.0074
Tb927.4.1390	Tb927.4.1390	1425	1.183	0.000748938	1.6752	1.69533e-07	746	0.4489	0.0466716	0.5878	0.00236087	1.1299	6.57e-75
Tb927.4.1400	Tb927.4.1400	596	0.2683	1	-0.1965	0.84902	243	0.2423	0.912492	0.0638	0.926258	0.1811	0.103
Tb927.4.1410	Tb927.4.1410	2461	0.0411	1	-0.1783	0.690289	274	0.0587	1	-0.1798	0.744712	0.1989	0.0141
Tb927.4.1420	Tb927.4.1420	868	0.0394	1	0.0315	0.95593	#N/A	#N/A	#N/A	#N/A	#N/A	0.2739	0.0191
Tb927.4.1430	Tb927.4.1430	1758	0.0025	1	-0.2096	0.665519	570	-0.0415	1	-0.1814	0.833517	0.1796	0.0254
Tb927.4.1440	Tb927.4.1440	1171	0.0466	1	-0.0481	0.919426	307	-0.0288	1	-0.0432	0.949629	0.2085	0.0505
Tb927.4.1450	Tb927.4.1450	860	0.1472	1	-0.0026	1	#N/A	#N/A	#N/A	#N/A	#N/A	0.3582	2.41e-05
Tb927.4.1460	Tb927.4.1460	1580	0.1479	0.921484	0.006	0.99562	#N/A	#N/A	#N/A	#N/A	#N/A	0.2531	0.00064
Tb927.4.1470	Tb927.4.1470	1153	-0.0332	1	-0.0727	0.913735	#N/A	#N/A	#N/A	#N/A	#N/A	0.3303	0.0173
Tb927.4.1480	Tb927.4.1480	1177	0.1328	1	0.1821	0.858163	944	-0.1023	1	-0.089	0.810014	0.3208	3.48e-07
Tb927.4.1490	Tb927.4.1490	980	-0.0089	1	-0.2386	0.55673	#N/A	#N/A	#N/A	#N/A	#N/A	0.2546	0.00273
Tb927.4.1500	Tb927.4.1500	2185	-0.0839	1	-0.2575	0.740231	789	-0.0264	1	-0.0138	0.994622	-0.0527	0.477
Tb927.4.1510	Tb927.4.1510	1441	0.0322	1	-0.25	0.788193	#N/A	#N/A	#N/A	#N/A	#N/A	0.1766	0.00953
Tb927.4.1520	Tb927.4.1520	1245	0.0224	1	-0.1473	0.720195	182	0.1475	1	-0.214	0.749353	0.0963	0.436
Tb927.4.1530	Tb927.4.1530	2286	0.023	1	-0.1657	0.75877	#N/A	#N/A	#N/A	#N/A	#N/A	0.1975	0.00729
Tb927.4.1540	Tb927.4.1540	552	0.3741	0.444534	0.3295	0.461426	1629	0.263	0.922305	0.2042	0.737002	-0.0206	0.827
Tb927.4.1550	Tb927.4.1550	1140	0.0838	1	-0.2616	0.669189	1107	0.1367	0.930695	0.0726	0.841421	0.2409	0.000958
Tb927.4.1560	Tb927.4.1560	445	0.1258	1	-0.0842	0.913633	#N/A	#N/A	#N/A	#N/A	#N/A	-0.0665	0.489
Tb927.4.1570	Tb927.4.1570	1746	-0.0006	1	-0.114	0.818186	273	-0.028	1	-0.0501	0.957745	0.225	0.0261
Tb927.4.1580	Tb927.4.1580	1665	0.0332	1	-0.2052	0.576289	#N/A	#N/A	#N/A	#N/A	#N/A	0.2517	0.0149
Tb927.4.1590.1-p1-CDS1	Tb927.4.1590	1938	-0.0038	1	-0.1227	0.648276	#N/A	#N/A	#N/A	#N/A	#N/A	0.2365	0.00472
Tb927.4.1590.2-p1-CDS1	Tb927.4.1590	1833	-0.0029	1	-0.1188	0.669028	#N/A	#N/A	#N/A	#N/A	#N/A	0.2365	0.00472
Tb927.4.1600	Tb927.4.1600	1546	0.1571	1	0.1875	0.74793	#N/A	#N/A	#N/A	#N/A	#N/A	0.015	0.898
Tb927.4.1610	Tb927.4.1610	1472	0.1004	1	0.071	0.840053	920	0.048	1	-0.007	0.997243	0.0082	0.945
Tb927.4.1620	Tb927.4.1620	655	-0.1131	1	-0.6211	0.12067	624	-0.1069	1	-0.5132	0.000366428	0.2501	0.0038
Tb927.4.1630	Tb927.4.1630	3358	-0.0264	1	-0.1875	0.747604	685	-0.0615	1	-0.1985	0.561966	-0.0148	0.874
Tb927.4.1640	Tb927.4.1640	1311	0.0029	1	-0.1147	0.877836	1105	-0.1242	1	-0.1225	0.819876	0.0081	0.943
Tb927.4.1650	Tb927.4.1650	632	0.1947	1	0.1002	0.925744	#N/A	#N/A	#N/A	#N/A	#N/A	0.1963	0.0125
Tb927.4.1660	Tb927.4.1660	609	0.1079	1	-0.2413	0.787534	#N/A	#N/A	#N/A	#N/A	#N/A	0.1896	0.0173
Tb927.4.1670	Tb927.4.1670	638	-0.6347	0.0239435	-0.56	0.052487	#N/A	#N/A	#N/A	#N/A	#N/A	0.3211	0.0202
Tb927.4.1680	Tb927.4.1680	1613	0.0881	1	-0.0336	0.965371	#N/A	#N/A	#N/A	#N/A	#N/A	0.1251	0.0961
Tb927.4.1690	Tb927.4.1690	1037	-0.0218	1	-0.1227	0.774894	1039	-0.0109	1	0.0109	0.993897	-0.1204	0.181
Tb927.4.1700	Tb927.4.1700	559	0.0369	1	-0.0854	0.918601	#N/A	#N/A	#N/A	#N/A	#N/A	0.2505	0.00217
Tb927.4.1710	Tb927.4.1710	1476	-0.0691	1	-0.2278	0.516834	1351	-0.0633	1	-0.1599	0.73503	0.1959	0.0402
Tb927.4.1720	Tb927.4.1720	1879	0.0516	1	-0.0413	0.95124	328	0.1892	1	-0.0304	0.979524	0.015	0.891
Tb927.4.1730	Tb927.4.1730	413	0.1622	1	0.1265	0.850714	#N/A	#N/A	#N/A	#N/A	#N/A	0.2672	0.0472
Tb927.4.1740	Tb927.4.1740	2755	0.0994	1	-0.0039	0.998987	678	0.2921	0.444392	0.2333	0.478239	-0.0216	0.826
Tb927.4.1750	Tb927.4.1750	739	-0.1066	1	-0.1638	0.712669	243	0.0394	1	-0.067	0.912719	0.0938	0.451
Tb927.4.1760	Tb927.4.1760	862	0.0368	1	-0.0357	0.925744	1471	0.0141	1	-0.1301	0.735275	0.0673	0.628
Tb927.4.1770	Tb927.4.1770	1469	0.1067	1	0.1233	0.771781	1622	0.0688	1	0.1915	0.648235	0.0797	0.493
Tb927.4.1780	Tb927.4.1780	891	0.0581	1	-0.2084	0.516981	572	0.078	1	-0.0787	0.884348	0.0495	0.657
Tb927.4.1790	Tb927.4.1790	35383	-0.3161	0.152852	-0.3496	0.0616229	5435	-0.329	0.597	-0.2505	0.582102	-0.1044	0.11
Tb927.4.1800	Tb927.4.1800	35677	-0.3064	0.183265	-0.3348	0.0838848	7797	-0.3357	0.662416	-0.2892	0.549803	-0.0982	0.154
Tb927.4.1810	Tb927.4.1810	813	-0.0865	1	-0.1593	0.752693	1589	-0.0408	1	-0.0536	0.911014	0.1099	0.409
Tb927.4.1820	Tb927.4.1820	1817	-0.1958	1	-0.3836	0.331688	163	-0.2901	0.997926	-0.556	0.311255	-0.1393	0.134
Tb927.4.1830	Tb927.4.1830	859	-0.1829	0.938779	-0.1028	0.834256	303	-0.1191	1	-0.0292	0.961035	0.275	0.0178
Tb927.4.1840	Tb927.4.1840	392	0.4408	0.580881	1.2691	0.00060014	74	0.5256	0.508884	1.8176	0.000102536	-0.0944	0.199
Tb927.4.1850	Tb927.4.1850	2540	-0.0141	1	-0.2258	0.571136	369	0.0148	1	-0.2501	0.590063	-0.1674	0.0211
Tb927.4.1860	Tb927.4.1860	21269	-0.2189	1	0.0134	0.992675	15940	-0.2357	0.990479	0.0687	0.929405	-0.0811	0.245
Tb927.4.1870	Tb927.4.1870	320	0.4471	0.820034	0.6486	0.339804	1581	-0.0754	1	-0.0153	0.994622	-0.005	0.963
Tb927.4.1880	Tb927.4.1880	237	0.5475	0.0939898	0.6576	0.0290992	696	0.4842	0.633373	0.7735	0.0994253	0.4144	1.12e-06
Tb927.4.1890	Tb927.4.1890	711	0.016	1	-0.0844	0.879969	884	0.0537	1	-0.0115	0.988866	-0.0078	0.955
Tb927.4.1900	Tb927.4.1900	838	-0.1742	1	-0.1989	0.745965	637	-0.1122	1	-0.1494	0.742617	-0.1527	0.176
Tb927.4.1910	Tb927.4.1910	738	4.0687	4.91681e-18	2.2283	1.00136e-05	#N/A	#N/A	#N/A	#N/A	#N/A	0.4107	1.84e-08
Tb927.4.1920	Tb927.4.1920	2300	-0.0192	1	-0.0721	0.895305	#N/A	#N/A	#N/A	#N/A	#N/A	-0.092	0.204
Tb927.4.1930	Tb927.4.1930	3371	-0.2154	0.832724	-0.1107	0.81366	885	-0.2015	0.911089	0.004	0.999985	-0.3662	0.0005
Tb927.4.1940	Tb927.4.1940	1012	-0.0511	1	-0.2821	0.257609	717	0.0313	1	-0.044	0.93727	0.0071	0.949
Tb927.4.1950	Tb927.4.1950	2567	0.0409	1	-0.1301	0.70939	502	0.0445	1	0.0103	0.989685	0.1671	0.0166
Tb927.4.1960	Tb927.4.1960	1644	0.1448	0.994489	0.0804	0.854682	#N/A	#N/A	#N/A	#N/A	#N/A	0.0558	0.642
Tb927.4.1970	Tb927.4.1970	1413	-0.0648	1	-0.2009	0.385772	335	-0.1366	1	0.0896	0.909153	0.2049	0.0091
Tb927.4.1980	Tb927.4.1980	1467	-0.013	1	-0.002	1	196	-0.1502	1	0.0256	0.976369	-0.0863	0.298
Tb927.4.1990	Tb927.4.1990	974	0.1321	1	0.1155	0.75877	#N/A	#N/A	#N/A	#N/A	#N/A	-0.0355	0.721
Tb927.4.2000	Tb927.4.2000	2719	-0.0317	1	-0.0438	0.954637	321	0.0331	1	0.055	0.921634	-0.2619	8.42e-05
Tb927.4.2010	Tb927.4.2010	1027	-0.0043	1	0.0219	0.971173	2141	0.0314	1	0.0191	0.977061	-0.031	0.838
Tb927.4.2020	Tb927.4.2020	2130	-0.0221	1	-0.2359	0.51179	635	-0.0281	1	-0.1144	0.860668	0.0738	0.461
Tb927.4.2030	Tb927.4.2030	2102	0.1219	1	0.1638	0.692272	2126	0.1029	1	0.173	0.729433	-0.0758	0.417
Tb927.4.2040	Tb927.4.2040	3896	-0.4264	0.478384	-0.2529	0.658094	5461	-0.4775	0.500039	-0.1813	0.80787	-0.4122	4.1e-06
Tb927.4.2050	Tb927.4.2050	883	0.0137	1	0.3033	0.385486	476	-0.3967	0.502615	-0.2563	0.62293	-0.1858	0.0499
Tb927.4.2060	Tb927.4.2060	1189	0.0938	1	-0.0552	0.961035	189	0.0242	1	0.1077	0.857569	-0.0774	0.388
Tb927.4.2070	Tb927.4.2070	693	-0.4124	0.998419	0.4876	0.63619	59	-0.5767	0.777217	0.6415	0.492619	-0.181	0.00275
Tb927.4.2080	Tb927.4.2080	1738	-0.1446	1	0.172	0.836984	#N/A	#N/A	#N/A	#N/A	#N/A	-0.2066	0.00262
Tb927.4.2090	Tb927.4.2090	1	-0.182	1	0.8006	0.922735	#N/A	#N/A	#N/A	#N/A	#N/A	0.8286	0.207
Tb927.4.2100	Tb927.4.2100	162	0.0753	1	0.2221	0.615769	139	0.0734	1	0.4456	0.36031	0.1721	0.293
Tb927.4.2110	Tb927.4.2110	310	0.014	1	-0.1921	0.797343	#N/A	#N/A	#N/A	#N/A	#N/A	0.0323	0.818
Tb927.4.2120	Tb927.4.2120	1362	-0.099	1	-0.3196	0.494409	44	-0.0911	1	-0.3175	0.718296	0.2019	0.0377
Tb927.4.2130	Tb927.4.2130	1957	-0.1188	1	-0.1492	0.748643	176	-0.101	1	-0.0773	0.942271	0.1599	0.118
Tb927.4.2140	Tb927.4.2140	1330	-0.0238	1	-0.277	0.476188	525	0.0029	1	-0.1884	0.836204	0.0017	0.988
Tb927.4.2150	Tb927.4.2150	781	0.1177	1	0.0735	0.885068	241	0.0609	1	0.0227	0.982372	0.1037	0.515
Tb927.4.2160	Tb927.4.2160	412	0.2055	1	0.0403	0.969307	634	0.0743	1	0.1149	0.896914	0.2233	0.111
Tb927.4.2170	Tb927.4.2170	473	-0.1073	1	-0.1567	0.799001	1863	-0.0502	1	-0.1061	0.7579	0.1987	0.0654
Tb927.4.2180	Tb927.4.2180	28462	-0.2878	0.550612	-0.0792	0.873903	13959	-0.2618	0.670874	-0.0997	0.836984	-0.0992	0.125
Tb927.4.2190	Tb927.4.2190	1003	-0.1049	1	-0.2212	0.727553	#N/A	#N/A	#N/A	#N/A	#N/A	-0.0602	0.551
Tb927.4.2200	Tb927.4.2200	1434	-0.0896	1	-0.3258	0.593902	#N/A	#N/A	#N/A	#N/A	#N/A	-0.0584	0.46
Tb927.4.2210	Tb927.4.2210	347	0.1745	1	-0.0748	0.939691	2088	0.1284	1	0.2615	0.434383	0.0153	0.908
Tb927.4.2220	Tb927.4.2220	436	0.086	1	-0.2247	0.834256	800	0.1198	1	0.2347	0.71499	0.152	0.0491
Tb927.4.2230	Tb927.4.2230	887	0.0207	1	-0.129	0.816457	247	0.0387	1	-0.0973	0.859673	0.1206	0.154
Tb927.4.2240	Tb927.4.2240	2409	-0.2053	0.886847	-0.2576	0.490267	1232	-0.2513	0.954904	-0.1749	0.785368	0.4142	4.16e-09
Tb927.4.2250	Tb927.4.2250	1044	-0.001	1	-0.2585	0.378938	128	-0.0476	1	-0.1604	0.840053	0.0574	0.66
Tb927.4.2260	Tb927.4.2260	654	0.1934	1	0.2401	0.627612	#N/A	#N/A	#N/A	#N/A	#N/A	0.0596	0.606
Tb927.4.2265	Tb927.4.2265	678	2.6229	2.8965e-14	1.5337	3.97366e-05	131	2.4425	1.75511e-12	2.9064	3.50749e-15	0.7953	2.16e-12
Tb927.4.2270	Tb927.4.2270	839	0.0034	1	-0.1311	0.642984	196	0.0276	1	0.0075	0.998896	-0.1779	0.103
Tb927.4.2280	Tb927.4.2280	712	0.1017	1	-0.0702	0.918601	617	0.0893	1	-0.0676	0.866802	-0.0563	0.619
Tb927.4.2290	Tb927.4.2290	1215	0.1357	1	0.0543	0.946241	166	-0.0676	1	-0.306	0.55673	0.3696	2.5e-07
Tb927.4.2300	Tb927.4.2300	564	0.1232	1	-0.1191	0.874498	#N/A	#N/A	#N/A	#N/A	#N/A	-0.1439	0.0674
Tb927.4.2310	Tb927.4.2310	2053	-0.3221	0.998401	-0.5036	0.486885	1643	-0.2884	0.883631	-0.0735	0.925367	-1.0461	4.57e-44
Tb927.4.2320	Tb927.4.2320	747	0.0592	1	0.0433	0.937194	1860	0.0418	1	0.0553	0.926074	-0.2462	0.0183
Tb927.4.2330	Tb927.4.2330	828	0.0333	1	-0.0962	0.867822	#N/A	#N/A	#N/A	#N/A	#N/A	0.1395	0.395
Tb927.4.2340	Tb927.4.2340	1869	-0.0604	1	-0.1978	0.493017	156	-0.1791	1	-0.0886	0.935951	-0.0992	0.256
Tb927.4.2350	Tb927.4.2350	540	0.0386	1	-0.2536	0.534854	246	0.0878	1	-0.2289	0.580168	-0.0509	0.733
Tb927.4.2360	Tb927.4.2360	1708	-0.2637	0.857001	-0.4706	0.188844	#N/A	#N/A	#N/A	#N/A	#N/A	-0.0081	0.952
Tb927.4.2370	Tb927.4.2370	1344	-0.0519	1	-0.3948	0.347634	#N/A	#N/A	#N/A	#N/A	#N/A	0.0503	0.619
Tb927.4.2380	Tb927.4.2380	435	0.16	1	-0.3111	0.665519	#N/A	#N/A	#N/A	#N/A	#N/A	0.1979	0.0164
Tb927.4.2390	Tb927.4.2390	1923	-0.126	0.935819	-0.3639	0.0259416	119	-0.199	1	-0.2558	0.705613	0.0121	0.905
Tb927.4.2400	Tb927.4.2400	1571	0.1186	1	-0.139	0.836785	479	0.0258	1	-0.0583	0.95575	-0.1718	0.0135
Tb927.4.2410	Tb927.4.2410	826	0.7023	0.104874	0.47	0.368128	#N/A	#N/A	#N/A	#N/A	#N/A	1.0956	8.63e-50
Tb927.4.2420	Tb927.4.2420	690	0.019	1	0.0072	0.993897	445	-0.2314	0.715325	-0.0506	0.918601	0.1409	0.359
Tb927.4.2430	Tb927.4.2430	996	-0.0816	1	-0.1892	0.7781	1298	-0.1112	1	-0.0104	0.995357	-0.1628	0.0404
Tb927.4.2440	Tb927.4.2440	921	-0.1259	1	-0.4058	0.09811	783	-0.1941	0.893895	-0.2598	0.449332	0.1199	0.275
Tb927.4.2450	Tb927.4.2450	1905	0.3511	0.536568	0.4867	0.141144	602	0.4038	0.353478	0.485	0.136382	0.0237	0.809
Tb927.4.2460	Tb927.4.2460	116	0.703	0.120919	0.6974	0.203724	277	-0.0826	1	-0.6615	0.144116	0.1955	0.0143
Tb927.4.2470	Tb927.4.2470	1892	-0.214	0.99836	-0.4973	0.182614	388	-0.1909	1	-0.3667	0.524343	-0.222	0.00412
Tb927.4.2480	Tb927.4.2480	706	-0.1723	1	-0.5587	0.228838	635	-0.0381	1	-0.2413	0.555925	-0.1231	0.263
Tb927.4.2490	Tb927.4.2490	706	0.0663	1	-0.1153	0.821997	#N/A	#N/A	#N/A	#N/A	#N/A	-0.3268	0.000486
Tb927.4.2500	Tb927.4.2500	743	1.8526	3.50251e-06	3.444	1.98037e-19	662	0.6406	0.0402931	0.8089	0.00305526	0.6291	7.57e-26
Tb927.4.2510	Tb927.4.2510	767	-0.0254	1	-0.2718	0.647643	66	0.032	1	-0.0191	0.991958	-0.1144	0.126
Tb927.4.2520	Tb927.4.2520	967	-0.059	1	-0.07	0.851158	271	-0.2093	0.978669	-0.1318	0.818157	-0.2235	0.0267
Tb927.4.2530	Tb927.4.2530	1140	-0.4709	0.529468	-0.5525	0.27036	1989	-0.504	0.560533	-0.2364	0.763741	-0.6066	1.54e-21
Tb927.4.2540	Tb927.4.2540	372	0.0958	1	0.6074	0.42452	525	0.0404	1	0.3706	0.591975	0.1453	0.436
Tb927.4.2550	Tb927.4.2550	1379	-0.3074	0.21112	-0.326	0.12008	238	-0.2665	0.751363	-0.1307	0.797651	-0.0618	0.613
Tb927.4.2560	Tb927.4.2560	502	0.024	1	-0.1622	0.872751	#N/A	#N/A	#N/A	#N/A	#N/A	-0.1049	0.324
Tb927.4.2570	Tb927.4.2570	330	-0.0769	1	-0.3854	0.275269	#N/A	#N/A	#N/A	#N/A	#N/A	-0.0505	0.762
Tb927.4.2580	Tb927.4.2580	468	-0.173	1	-0.4969	0.350018	#N/A	#N/A	#N/A	#N/A	#N/A	-0.1305	0.177
Tb927.4.2590	Tb927.4.2590	131	0.5031	0.727937	0.0271	0.992883	399	0.3256	0.917538	0.0093	0.997952	0.1908	0.0614
Tb927.4.2600	Tb927.4.2600	518	0.8285	0.0473259	1.144	0.00131145	#N/A	#N/A	#N/A	#N/A	#N/A	-0.2136	0.00386
Tb927.4.2610	Tb927.4.2610	211	-0.2092	1	0.1467	0.835598	#N/A	#N/A	#N/A	#N/A	#N/A	-0.7946	5.31e-16
Tb927.4.2620	Tb927.4.2620	743	-0.2097	1	-0.4423	0.316925	#N/A	#N/A	#N/A	#N/A	#N/A	-0.22	0.0775
Tb927.4.2630	Tb927.4.2630	1161	-0.3324	0.787705	-0.4601	0.324056	427	-0.2794	0.818044	-0.2613	0.592147	-0.5561	4.04e-13
Tb927.4.2640	Tb927.4.2640	1329	-0.0677	1	-0.2159	0.622086	593	-0.095	1	-0.2393	0.67565	-0.12	0.132
Tb927.4.2650	Tb927.4.2650	226	-0.0246	1	-0.3684	0.781862	341	-0.1525	1	0.0429	0.975784	-0.2126	0.0199
Tb927.4.2660	Tb927.4.2660	337	-0.3569	0.794621	0.0048	1	329	-0.3029	0.744598	0.0033	1	-0.2039	0.257
Tb927.4.2670	Tb927.4.2670	678	-0.1829	1	-0.3989	0.366861	454	-0.3256	0.318729	-0.2784	0.3642	-0.6496	1.18e-11
Tb927.4.2680	Tb927.4.2680	816	-0.1463	1	-0.4552	0.511837	614	-0.1615	0.932143	-0.0872	0.841094	-0.5386	1.21e-15
Tb927.4.2700	Tb927.4.2700	541	0.047	1	0.1882	0.827963	369	-0.1269	1	0.2875	0.658395	-0.2506	0.00776
Tb927.4.2710	Tb927.4.2710	445	-0.1443	1	0.1321	0.865259	#N/A	#N/A	#N/A	#N/A	#N/A	-0.3077	0.017
Tb927.4.2720	Tb927.4.2720	839	-0.2707	0.976739	-0.4061	0.478239	430	-0.1963	0.857737	-0.1882	0.616364	-0.5014	6.89e-09
Tb927.4.2730	Tb927.4.2730	498	0.1547	1	-0.5333	0.565586	753	0.0662	1	0.0957	0.832145	-0.2607	0.000309
Tb927.4.2740	Tb927.4.2740	1703	0.1309	1	0.3018	0.801274	755	0.097	1	0.0155	0.997933	0.3585	0.000276
Tb927.4.2750	Tb927.4.2750	769	0.169	1	0.3103	0.749057	627	0.2931	1	0.4906	0.555239	-0.3141	0.000137
Tb927.4.2760	Tb927.4.2760	907	-0.1861	1	-0.3641	0.542859	252	-0.1049	1	-0.0118	0.988988	0.014	0.898
Tb927.4.2770	Tb927.4.2770	2495	-0.2848	0.610305	-0.0271	0.967589	567	-0.3089	0.707857	0.1206	0.842688	-0.0707	0.47
Tb927.4.2780	Tb927.4.2780	1141	-0.2595	0.700552	-0.4966	0.0524692	191	-0.3152	0.839326	-0.3468	0.518806	-0.5489	1.1e-13
Tb927.4.2790	Tb927.4.2790	1149	-0.1941	1	-0.4382	0.261142	381	-0.2054	0.956936	-0.3881	0.261478	-0.214	0.0162
Tb927.4.2800	Tb927.4.2800	312	0.6958	0.297919	2.268	9.70487e-08	#N/A	#N/A	#N/A	#N/A	#N/A	-0.7651	4.87e-27
Tb927.4.2810	Tb927.4.2810	226	0.0211	1	1.6388	0.0115823	#N/A	#N/A	#N/A	#N/A	#N/A	-1.1489	5.13e-36
Tb927.4.2820	Tb927.4.2820	845	-0.3373	0.813826	-0.5836	0.174712	74	-0.1942	1	-0.2357	0.800313	-0.7182	5e-22
Tb927.4.2830	Tb927.4.2830	935	0.0172	1	-0.0075	0.998247	#N/A	#N/A	#N/A	#N/A	#N/A	-0.3407	0.0101
Tb927.4.2840	Tb927.4.2840	682	-0.0596	1	-0.0299	0.987204	#N/A	#N/A	#N/A	#N/A	#N/A	-0.6444	2.56e-11
Tb927.4.2850	Tb927.4.2850	1073	-0.2876	0.693579	-0.3584	0.326683	540	-0.2766	0.839962	-0.2547	0.614812	-0.549	1.42e-10
Tb927.4.2860	Tb927.4.2860	1155	0.0084	1	-0.1593	0.687838	410	-0.0485	1	-0.2193	0.722473	-0.3632	0.000466
Tb927.4.2870	Tb927.4.2870	623	-0.1947	1	-0.1857	0.818157	548	-0.177	1	-0.1721	0.791325	-0.3223	0.00268
Tb927.4.2880	Tb927.4.2880	1892	-0.2169	1	-0.3193	0.667796	#N/A	#N/A	#N/A	#N/A	#N/A	-0.7317	2.95e-35
Tb927.4.2890	Tb927.4.2890	1551	-0.1225	1	-0.2683	0.524051	1161	-0.1877	0.972825	-0.2088	0.629204	-0.3285	4.04e-05
Tb927.4.2900	Tb927.4.2900	1038	-0.3888	0.635952	-0.5796	0.145218	395	-0.3404	0.678196	-0.3327	0.476188	-0.4819	9.09e-10
Tb927.4.2910	Tb927.4.2910	839	-0.1904	1	-0.3535	0.701166	#N/A	#N/A	#N/A	#N/A	#N/A	-0.5896	3.53e-15
Tb927.4.2920	Tb927.4.2920	836	-0.4295	0.626492	-0.7615	0.0572716	325	-0.429	0.36319	-0.5424	0.110388	-0.7431	2.74e-25
Tb927.4.2930	Tb927.4.2930	1527	-0.3458	0.237119	-0.3625	0.142903	412	-0.3297	0.357547	-0.3618	0.177687	-0.3043	0.025
Tb927.4.2935	Tb927.4.2935	64	-0.2053	1	-0.3395	0.663677	#N/A	#N/A	#N/A	#N/A	#N/A	-0.3943	0.25
Tb927.4.2940	Tb927.4.2940	501	-0.2626	0.690176	-0.4514	0.0866412	#N/A	#N/A	#N/A	#N/A	#N/A	-0.3749	0.00648
Tb927.4.2950	Tb927.4.2950	352	0.1429	1	-0.6912	0.502873	#N/A	#N/A	#N/A	#N/A	#N/A	-0.4181	8.27e-07
Tb927.4.2960	Tb927.4.2960	176	-0.4382	0.661638	-0.3964	0.543235	#N/A	#N/A	#N/A	#N/A	#N/A	-0.4251	0.0292
Tb927.4.2970	Tb927.4.2970	363	-0.2319	1	-0.4725	0.499624	692	-0.2308	0.866265	-0.3803	0.259623	-0.3967	0.00254
Tb927.4.2980	Tb927.4.2980	184	-0.2047	0.983129	-0.418	0.283842	#N/A	#N/A	#N/A	#N/A	#N/A	-0.5379	0.0339
Tb927.4.2990	Tb927.4.2990	532	-0.1701	1	-0.6313	0.0153048	#N/A	#N/A	#N/A	#N/A	#N/A	-0.7353	4.56e-24
Tb927.4.3000	Tb927.4.3000	477	-0.2922	0.582387	-0.3376	0.305897	183	-0.0877	1	-0.1874	0.674188	-0.6095	3.85e-07
Tb927.4.3010	Tb927.4.3010	882	-0.2052	0.822255	-0.237	0.476844	#N/A	#N/A	#N/A	#N/A	#N/A	-0.4947	8.56e-05
Tb927.4.3020	Tb927.4.3020	730	-0.3283	0.832724	-0.4341	0.400919	#N/A	#N/A	#N/A	#N/A	#N/A	-0.7457	6.78e-19
Tb927.4.3030	Tb927.4.3030	694	0.0609	1	-0.0835	0.897692	42	-0.0084	1	0.2185	0.830538	-0.6192	3.29e-09
Tb927.4.3040	Tb927.4.3040	183	-0.1212	1	-0.0136	0.991024	84	-0.0494	1	-0.0042	1	-0.5826	5.96e-06
Tb927.4.3050	Tb927.4.3050	163	-0.1313	1	-0.5083	0.299846	42	0.0001	1	-0.6689	0.50439	-0.5874	0.000318
Tb927.4.3060	Tb927.4.3060	498	-0.1749	1	-0.1738	0.803566	#N/A	#N/A	#N/A	#N/A	#N/A	-0.9309	3.02e-14
Tb927.4.3070	Tb927.4.3070	1099	-0.1389	0.983774	-0.2818	0.261816	399	-0.2246	0.935819	-0.1694	0.749057	-0.7837	2.22e-15
Tb927.4.3080	Tb927.4.3080	405	-0.3234	0.621099	-0.1426	0.798805	104	-0.2505	0.949654	-0.1997	0.733052	-0.5882	0.000534
Tb927.4.3090	Tb927.4.3090	217	-0.181	0.984102	-0.4513	0.145863	168	-0.2043	0.925166	-0.1416	0.775088	-0.6102	4.7e-05
Tb927.4.3100	Tb927.4.3100	1466	-0.2397	0.942932	-0.4416	0.271624	250	-0.2428	1	-0.2891	0.642684	-0.3165	0.00689
Tb927.4.3110	Tb927.4.3110	987	-0.1655	1	-0.434	0.246705	#N/A	#N/A	#N/A	#N/A	#N/A	-0.639	1.76e-06
Tb927.4.3120	Tb927.4.3120	316	-0.1457	1	-0.8211	0.179301	179	-0.0404	1	-0.1503	0.819733	-0.6353	2.48e-13
Tb927.4.3130	Tb927.4.3130	798	-0.1959	0.766972	-0.3898	0.0615953	#N/A	#N/A	#N/A	#N/A	#N/A	-0.7758	5.99e-14
Tb927.4.3140	Tb927.4.3140	1058	-0.3139	0.763007	-0.2708	0.605902	#N/A	#N/A	#N/A	#N/A	#N/A	-0.8575	5.18e-21
Tb927.4.3150	Tb927.4.3150	1026	-0.2538	0.943182	-0.3443	0.501094	1169	-0.3048	0.734692	-0.3992	0.312962	-0.9126	3.82e-22
Tb927.4.3160	Tb927.4.3160	531	0.1657	1	0.8777	0.202415	264	-0.1919	1	0.0165	0.992883	-0.9474	4.41e-46
Tb927.4.3170	Tb927.4.3170	401	1.1679	8.47112e-07	1.3749	3.81153e-08	162	0.5729	0.128382	1.2644	1.02201e-05	0.6864	7.01e-24
Tb927.4.3180	Tb927.4.3180	345	-0.2075	1	-0.2049	0.754544	#N/A	#N/A	#N/A	#N/A	#N/A	-0.6061	1.94e-07
Tb927.4.3190	Tb927.4.3190	1511	-0.0667	1	-0.1388	0.759292	309	-0.1525	1	-0.2964	0.61543	-0.0533	0.692
Tb927.4.3200	Tb927.4.3200	0	#VALUE!	NA	#VALUE!	NA	#N/A	#N/A	#N/A	#N/A	#N/A	0	0
Tb927.4.3210	Tb927.4.3210	0	#VALUE!	NA	#VALUE!	NA	#N/A	#N/A	#N/A	#N/A	#N/A	0	0
Tb927.4.3220	Tb927.4.3220	0	-1.1442	NA	0	NA	#N/A	#N/A	#N/A	#N/A	#N/A	0.8157	NA
Tb927.4.3230	Tb927.4.3230	0	0	NA	1.6747	NA	#N/A	#N/A	#N/A	#N/A	#N/A	2.5268	NA
Tb927.4.3240	Tb927.4.3240	0	#VALUE!	NA	#VALUE!	NA	#N/A	#N/A	#N/A	#N/A	#N/A	0	0
Tb927.4.3250	Tb927.4.3250	0	#VALUE!	NA	#VALUE!	NA	#N/A	#N/A	#N/A	#N/A	#N/A	0	0
Tb927.4.3260	Tb927.4.3260	0	#VALUE!	NA	#VALUE!	NA	#N/A	#N/A	#N/A	#N/A	#N/A	0	0
Tb927.4.3270	Tb927.4.3270	0	#VALUE!	NA	#VALUE!	NA	#N/A	#N/A	#N/A	#N/A	#N/A	0	0
Tb927.4.3280	Tb927.4.3280	4	-0.492	1	-0.2253	0.964207	#N/A	#N/A	#N/A	#N/A	#N/A	1.0571	0.127
Tb927.4.3290	Tb927.4.3290	8	-0.4306	1	-0.6239	0.820809	#N/A	#N/A	#N/A	#N/A	#N/A	0.7272	0.387
Tb927.4.3300	Tb927.4.3300	2119	0.0398	1	-0.05	0.941509	374	0.0384	1	0.0581	0.909471	0.1933	0.0128
Tb927.4.3310	Tb927.4.3310	1929	-0.0644	1	-0.0646	0.918601	#N/A	#N/A	#N/A	#N/A	#N/A	-0.0177	0.88
Tb927.4.3320	Tb927.4.3320	1654	0.7585	0.179055	0.921	0.0414504	245	0.7032	0.413588	0.8298	0.181959	0.6964	5.77e-15
Tb927.4.3330	Tb927.4.3330	271	0.2315	1	0.3431	0.575561	237	0.1308	1	0.5273	0.182614	0.2087	0.0319
Tb927.4.3340	Tb927.4.3340	848	0.8136	0.0139136	0.699	0.0403238	341	0.6311	0.0847857	0.4473	0.284748	0.8663	2.14e-18
Tb927.4.3350	Tb927.4.3350	972	-0.1081	1	-0.3042	0.586013	1930	-0.1371	1	-0.2019	0.619635	-0.143	0.0983
Tb927.4.3360	Tb927.4.3360	1700	0.0791	1	-0.1351	0.82281	504	-0.1054	1	0.008	0.998809	0.1913	0.039
Tb927.4.3370	Tb927.4.3370	1680	-0.006	1	-0.1489	0.708468	546	0.0173	1	-0.1056	0.869145	0.0025	0.985
Tb927.4.3380	Tb927.4.3380	1240	0.325	0.251261	0.2008	0.548683	#N/A	#N/A	#N/A	#N/A	#N/A	0.0044	0.961
Tb927.4.3390	Tb927.4.3390	1294	-0.0684	1	-0.1679	0.718724	269	-0.0977	1	0.0447	0.963951	0.0935	0.294
Tb927.4.3400	Tb927.4.3400	1377	0.4533	0.357547	0.2414	0.660569	208	0.4652	0.0815854	0.458	0.0604352	-0.3593	1.35e-07
Tb927.4.3410	Tb927.4.3410	1537	0.0023	1	-0.3102	0.731172	1056	-0.0217	1	-0.1719	0.851099	0.1798	0.0127
Tb927.4.3420	Tb927.4.3420	1321	0.1588	0.862295	0.1156	0.729575	#N/A	#N/A	#N/A	#N/A	#N/A	0.0768	0.403
Tb927.4.3430	Tb927.4.3430	1367	-0.1358	1	-0.0883	0.868416	1983	-0.2325	0.642714	-0.0762	0.859723	-0.1328	0.258
Tb927.4.3440	Tb927.4.3440	1085	0.0098	1	-0.2827	0.527119	466	-0.0194	1	-0.299	0.460222	0.0758	0.503
Tb927.4.3450	Tb927.4.3450	1886	0.0676	1	-0.0693	0.865664	4958	0.0314	1	-0.0489	0.93727	0.356	0.000551
Tb927.4.3460	Tb927.4.3460	1385	0.0145	1	0.1116	0.806043	1704	0.107	1	0.1837	0.702622	0.2421	0.0109
Tb927.4.3470	Tb927.4.3470	1471	0.2192	0.677908	0.2097	0.50129	#N/A	#N/A	#N/A	#N/A	#N/A	-0.0574	0.611
Tb927.4.3480	Tb927.4.3480	553	0.0404	1	0.0201	0.982214	905	0.0687	1	0.1154	0.806871	0.0573	0.645
Tb927.4.3490	Tb927.4.3490	1017	-0.0952	1	-0.1554	0.776689	110	-0.1515	1	0.0052	1	-0.0339	0.828
Tb927.4.3500	Tb927.4.3500	1931	0.1953	0.98218	0.1929	0.694682	2918	0.1985	1	0.368	0.371995	0.4373	3.39e-05
Tb927.4.3510	Tb927.4.3510	1505	-0.1258	1	-0.1391	0.771966	334	-0.1489	1	0.0343	0.961035	0.1017	0.376
Tb927.4.3520	Tb927.4.3520	935	0.5165	0.369597	0.4839	0.337417	#N/A	#N/A	#N/A	#N/A	#N/A	0.1877	0.146
Tb927.4.3530	Tb927.4.3530	1844	-0.0096	1	-0.1775	0.705613	#N/A	#N/A	#N/A	#N/A	#N/A	0.2851	0.00027
Tb927.4.3540	Tb927.4.3540	1593	-0.0419	1	-0.3497	0.430335	854	-0.0373	1	-0.396	0.524337	0.0599	0.606
Tb927.4.3550	Tb927.4.3550	38976	-0.3231	0.732567	-0.3944	0.368136	12377	-0.3429	0.835531	-0.4571	0.38923	-0.0245	0.788
Tb927.4.3560	Tb927.4.3560	1486	-0.2285	0.438012	-0.3168	0.0906316	#N/A	#N/A	#N/A	#N/A	#N/A	-0.106	0.257
Tb927.4.3570	Tb927.4.3570	5715	-0.0869	1	-0.0215	0.974609	1990	-0.0472	1	0.0189	0.97724	-0.399	9.79e-08
Tb927.4.3580	Tb927.4.3580	883	0.0232	1	-0.0383	0.967506	#N/A	#N/A	#N/A	#N/A	#N/A	0.457	0.00726
Tb927.4.3590	Tb927.4.3590	6735	-0.0511	1	-0.0044	0.999268	1931	-0.0529	1	0.0012	1	-0.4446	7.46e-10
Tb927.4.3600	Tb927.4.3600	880	0.0818	1	-0.1628	0.812865	#N/A	#N/A	#N/A	#N/A	#N/A	0.3578	0.0185
Tb927.4.3610	Tb927.4.3610	1260	-0.0749	1	-0.2987	0.35355	#N/A	#N/A	#N/A	#N/A	#N/A	0.0363	0.79
Tb927.4.3620	Tb927.4.3620	585	0.3553	0.856	0.6686	0.161372	2503	0.1232	1	0.1208	0.750521	0.0617	0.552
Tb927.4.3630	Tb927.4.3630	675	0.4466	0.65337	0.2649	0.71751	#N/A	#N/A	#N/A	#N/A	#N/A	0.1816	0.0198
Tb927.4.3640	Tb927.4.3640	673	0.3971	0.777375	0.3395	0.619402	831	0.4856	0.0239435	0.2895	0.294109	0.1358	0.096
Tb927.4.3650	Tb927.4.3650	1099	-0.0318	1	0.1668	0.706315	306	0.0385	1	0.1764	0.756891	0.4723	7.19e-05
Tb927.4.3660	Tb927.4.3660	1818	-0.0553	1	-0.164	0.680557	136	-0.5492	0.264261	-0.0332	0.971331	-0.0082	0.942
Tb927.4.3670	Tb927.4.3670	2874	-0.0613	1	-0.3167	0.629204	623	-0.2038	1	-0.3158	0.686831	-0.1439	0.0791
Tb927.4.3680	Tb927.4.3680	2175	-0.2225	0.967233	-0.3656	0.391151	#N/A	#N/A	#N/A	#N/A	#N/A	-0.0033	0.982
Tb927.4.3690	Tb927.4.3690	2261	-0.1192	1	-0.3337	0.251642	#N/A	#N/A	#N/A	#N/A	#N/A	0.0104	0.932
Tb927.4.3700	Tb927.4.3700	1961	-0.0466	1	-0.3362	0.55673	226	-0.2167	1	-0.1413	0.874271	-0.023	0.826
Tb927.4.3710	Tb927.4.3710	1157	-0.0267	1	-0.0278	0.971173	157	0.0116	1	0.1054	0.878208	0.4138	0.000559
Tb927.4.3720	Tb927.4.3720	788	-0.1121	1	0.1385	0.71751	#N/A	#N/A	#N/A	#N/A	#N/A	0.1021	0.447
Tb927.4.3730	Tb927.4.3730	1134	0.0387	1	-0.0349	0.96425	285	0.0332	1	0.0338	0.975835	0.2784	0.016
Tb927.4.3740	Tb927.4.3740	3962	0.0735	1	-0.1193	0.845614	176	-0.0523	1	0.2653	0.629204	-0.0346	0.707
Tb927.4.3750	Tb927.4.3750	411	0.0634	1	-0.3779	0.733605	160	-0.1899	1	0.0926	0.923697	-0.1836	0.0385
Tb927.4.3760	Tb927.4.3760	138	0.4759	0.9943	1.5999	0.0231183	55	0.5721	0.990479	2.2716	0.00722643	-0.7123	1.23e-10
Tb927.4.3770	Tb927.4.3770	280	0.9627	0.0335445	0.6202	0.283424	53	1.1916	0.0788331	0.5269	0.577187	-1.4478	3.57e-71
Tb927.4.3780	Tb927.4.3780	311	-0.2504	0.886847	0.1052	0.870646	#N/A	#N/A	#N/A	#N/A	#N/A	-0.6524	1.54e-06
Tb927.4.3790	Tb927.4.3790	2021	-0.2243	1	0.1403	0.863805	#N/A	#N/A	#N/A	#N/A	#N/A	-0.4543	1.65e-08
Tb927.4.3800	Tb927.4.3800	169	-0.077	1	-0.5282	0.643132	#N/A	#N/A	#N/A	#N/A	#N/A	-0.4545	8.22e-05
Tb927.4.3810	Tb927.4.3810	2555	-0.3731	0.610709	-0.4658	0.256281	#N/A	#N/A	#N/A	#N/A	#N/A	-0.9495	8.86e-48
Tb927.4.3820	Tb927.4.3820	376	-0.253	1	-0.5652	0.489624	#N/A	#N/A	#N/A	#N/A	#N/A	-0.7093	4.88e-15
Tb927.4.3830	Tb927.4.3830	957	-0.187	1	-0.0922	0.879969	44	-0.2189	1	-0.1449	0.865567	-0.4224	0.00218
Tb927.4.3840	Tb927.4.3840	1900	-0.5772	0.339658	-0.6025	0.217298	677	-0.5612	0.113576	-0.4366	0.254173	-1.1079	2.1e-42
Tb927.4.3850	Tb927.4.3850	1422	-0.6488	0.0722888	-0.635	0.060425	#N/A	#N/A	#N/A	#N/A	#N/A	-1.0761	8.41e-41
Tb927.4.3860	Tb927.4.3860	280	0.003	1	-0.3353	0.7307	172	-0.0312	1	-0.1342	0.881805	-0.2945	0.00144
Tb927.4.3870	Tb927.4.3870	265	0.132	1	-0.4566	0.695089	#N/A	#N/A	#N/A	#N/A	#N/A	-0.4407	1.25e-06
Tb927.4.3880	Tb927.4.3880	333	0.0721	1	-0.4055	0.718256	#N/A	#N/A	#N/A	#N/A	#N/A	-0.4524	1.88e-07
Tb927.4.3890	Tb927.4.3890	2133	-0.4042	0.714866	-0.6719	0.121946	779	-0.4343	0.523034	-0.3806	0.464257	-0.8027	4.19e-31
Tb927.4.3900	Tb927.4.3900	1635	-0.4327	0.458784	-0.6223	0.0753	#N/A	#N/A	#N/A	#N/A	#N/A	-0.6138	3.91e-11
Tb927.4.3910	Tb927.4.3910	383	-0.0782	1	-0.2342	0.835638	#N/A	#N/A	#N/A	#N/A	#N/A	-0.6648	3.55e-17
Tb927.4.3920	Tb927.4.3920	990	-0.2692	1	-0.4345	0.569901	492	-0.2249	0.944411	-0.0853	0.895305	-0.5483	7.41e-15
Tb927.4.3930	Tb927.4.3930	1343	-0.5865	0.178619	-0.3166	0.570819	1320	-1.0339	0.000141319	-1.2741	5.68887e-07	-1.0494	5.51e-54
Tb927.4.3940	Tb927.4.3940	540	-0.2813	1	-0.7851	0.180384	#N/A	#N/A	#N/A	#N/A	#N/A	-0.5144	2.4e-09
Tb927.4.3950	Tb927.4.3950	2643	-0.5318	0.558522	-0.4708	0.482467	1475	-0.5568	0.613851	-0.3421	0.690103	-0.9392	4.71e-45
Tb927.4.3960	Tb927.4.3960	267	-0.2965	0.839997	-0.6288	0.0934548	372	-0.4537	0.697511	-0.3595	0.61032	-0.5556	4.83e-05
Tb927.4.3970	Tb927.4.3970	28	1.9678	0.000122027	2.4174	0.00346465	304	0.7063	0.12827	0.4303	0.476914	-0.1174	0.218
Tb927.4.3980.1	Tb927.4.3980	523	0.1074	1	-0.1849	0.69211	239	0.1676	1	-0.0716	0.901328	-0.6088	8.76e-11
Tb927.4.3980.2	Tb927.4.3980	523	0.1086	1	-0.1848	0.692272	239	0.1676	1	-0.0716	0.901328	-0.6088	8.76e-11
Tb927.4.3990	Tb927.4.3990	219	0.3837	0.984015	0.2738	0.803846	#N/A	#N/A	#N/A	#N/A	#N/A	0.4177	0.00721
Tb927.4.4000	Tb927.4.4000	219	0.3589	0.918188	0.1719	0.860762	323	0.4335	0.124029	0.4996	0.0378828	0.2943	0.0479
Tb927.4.4010	Tb927.4.4010	207	0.4237	0.908604	0.1871	0.869558	#N/A	#N/A	#N/A	#N/A	#N/A	0.2805	0.0909
Tb927.4.4020	Tb927.4.4020	981	0.6908	0.0540257	0.8785	0.00422722	676	0.5287	0.044761	0.6118	0.00816495	-0.3623	2.22e-08
Tb927.4.4030	Tb927.4.4030	969	-0.2645	0.835531	-0.3764	0.344229	#N/A	#N/A	#N/A	#N/A	#N/A	-0.6189	2.72e-09
Tb927.4.4040	Tb927.4.4040	923	0.2599	1	0.5752	0.368128	1178	-0.1027	1	0.4115	0.463652	-0.4847	1.53e-13
Tb927.4.4050	Tb927.4.4050	4246	-0.1251	1	-0.1821	0.634495	1670	-0.1448	1	-0.1024	0.867632	-0.359	2.46e-08
Tb927.4.4060	Tb927.4.4060	476	0.0791	1	-0.267	0.755647	#N/A	#N/A	#N/A	#N/A	#N/A	-0.3781	9.89e-08
Tb927.4.4070	Tb927.4.4070	1652	-0.0878	1	-0.2421	0.675839	1753	-0.1263	1	-0.089	0.813338	-0.3328	0.000339
Tb927.4.4080	Tb927.4.4080	614	-0.1705	1	-0.2895	0.591587	564	-0.1951	0.9943	-0.3285	0.416518	0.2777	0.0639
Tb927.4.4090	Tb927.4.4090	676	0.0692	1	0.0412	0.937873	108	0.0265	1	0.3707	0.383954	-0.266	0.0129
Tb927.4.4100	Tb927.4.4100	927	-0.013	1	-0.1252	0.750585	#N/A	#N/A	#N/A	#N/A	#N/A	-0.2193	0.0103
Tb927.4.4110	Tb927.4.4110	756	0.0739	1	-0.1687	0.73887	#N/A	#N/A	#N/A	#N/A	#N/A	-0.2667	0.00226
Tb927.4.4120	Tb927.4.4120	575	-0.0107	1	0.0075	0.997315	52	-0.2315	1	-0.0261	0.985164	-0.6735	3.44e-09
Tb927.4.4130.1	Tb927.4.4130	624	0.0519	1	-0.1111	0.86125	337	0.1633	1	0.1256	0.856552	-0.4466	1.93e-07
Tb927.4.4130.2	Tb927.4.4130	665	0.0799	1	-0.0569	0.932143	337	0.1633	1	0.1256	0.856552	-0.4466	1.93e-07
Tb927.4.4140	Tb927.4.4140	646	0.1486	1	-0.0384	0.969307	#N/A	#N/A	#N/A	#N/A	#N/A	-0.3936	4.74e-05
Tb927.4.4150	Tb927.4.4150	1057	-0.1856	1	-0.3032	0.603918	391	-0.1448	1	-0.061	0.917337	-0.7382	1.07e-19
Tb927.4.4160	Tb927.4.4160	1464	-0.1389	1	-0.3492	0.587886	429	-0.212	0.988318	-0.2369	0.642096	-0.4481	5.68e-09
Tb927.4.4170	Tb927.4.4170	1226	0.1016	1	-0.2199	0.748024	162	0.1794	1	-0.1082	0.911014	-0.0771	0.651
Tb927.4.4180	Tb927.4.4180	706	0.0874	1	0.1332	0.87197	#N/A	#N/A	#N/A	#N/A	#N/A	-0.3296	0.000104
Tb927.4.4190	Tb927.4.4190	262	0.3931	0.91654	0.9456	0.0789105	423	0.1986	1	0.3297	0.568871	-0.5699	1.66e-07
Tb927.4.4200	Tb927.4.4200	812	-0.0512	1	-0.1339	0.72284	218	-0.1802	1	-0.0993	0.876928	-0.2605	0.0366
Tb927.4.4210	Tb927.4.4210	1423	-0.0571	1	-0.136	0.863805	#N/A	#N/A	#N/A	#N/A	#N/A	-0.2749	9.86e-05
Tb927.4.4220	Tb927.4.4220	414	1.66	4.72452e-06	2.8922	1.14127e-16	159	1.5878	6.14498e-14	3.0778	6.26705e-39	0.6209	6.85e-16
Tb927.4.4230	Tb927.4.4230	174	2.741	5.12121e-13	2.8478	9.52417e-09	828	1.0412	0.00412792	1.1088	0.00136198	0.3947	8.75e-07
Tb927.4.4240	Tb927.4.4240	560	0.5895	0.0753619	0.5363	0.109356	#N/A	#N/A	#N/A	#N/A	#N/A	0.1679	0.11
Tb927.4.4250	Tb927.4.4250	965	0.3052	0.750908	-0.0724	0.916621	398	-0.113	1	-0.231	0.493028	-0.0702	0.518
Tb927.4.4260	Tb927.4.4260	696	0.5751	0.0160878	0.491	0.0531441	#N/A	#N/A	#N/A	#N/A	#N/A	0.1128	0.216
Tb927.4.4270	Tb927.4.4270	1054	0.4244	0.314432	0.0276	0.972916	#N/A	#N/A	#N/A	#N/A	#N/A	-0.0964	0.356
Tb927.4.4280	Tb927.4.4280	507	0.5066	0.244791	0.393	0.397096	554	0.3951	0.0751464	0.9663	1.18655e-09	0.1671	0.11
Tb927.4.4290	Tb927.4.4290	1051	0.2374	0.944017	0.1106	0.867632	#N/A	#N/A	#N/A	#N/A	#N/A	-0.1728	0.0528
Tb927.4.430	Tb927.4.430	1724	-0.4277	0.524314	-0.1116	0.878331	505	-0.4959	0.289784	-0.156	0.810164	-0.4575	5.68e-07
Tb927.4.4300	Tb927.4.4300	635	-0.0513	1	-0.1962	0.811153	237	-0.09	1	0.0836	0.871233	0.086	0.387
Tb927.4.4310	Tb927.4.4310	2459	0.0018	1	-0.0679	0.918601	909	0.0106	1	-0.0436	0.921482	-0.2445	0.00253
Tb927.4.4320	Tb927.4.4320	466	-0.1296	1	-0.0978	0.880691	394	-0.06	1	0.1765	0.740231	-0.1938	0.177
Tb927.4.4330	Tb927.4.4330	624	-0.0471	1	-0.3775	0.336385	375	0.0021	1	-0.3296	0.321959	-0.2533	0.0186
Tb927.4.4340	Tb927.4.4340	494	-0.1631	1	-0.8044	0.0594392	#N/A	#N/A	#N/A	#N/A	#N/A	-0.2511	0.00697
Tb927.4.4350	Tb927.4.4350	3171	-0.0822	1	-0.0558	0.905212	773	-0.0826	1	0.0933	0.872119	0.2297	0.00853
Tb927.4.4360	Tb927.4.4360	904	0.0938	1	-0.1988	0.752693	#N/A	#N/A	#N/A	#N/A	#N/A	-0.079	0.454
Tb927.4.4370.1	Tb927.4.4370	481	0.2404	1	0.8536	0.020825	1622	0.3376	0.138834	0.3367	0.109641	-0.5749	3.24e-14
Tb927.4.4370.2	Tb927.4.4370	481	0.2406	1	0.8515	0.0215291	1622	0.3376	0.138834	0.3367	0.109641	-0.5749	3.24e-14
Tb927.4.4380	Tb927.4.4380	5606	-0.2502	1	-0.1375	0.883055	5322	-0.2366	0.849172	0.1837	0.698301	-0.5634	1.81e-19
Tb927.4.4390	Tb927.4.4390	522	0.6961	0.0116348	1.0115	3.66797e-05	#N/A	#N/A	#N/A	#N/A	#N/A	0.5403	1.65e-07
Tb927.4.4400	Tb927.4.4400	465	0.4804	0.766887	0.8072	0.172452	461	0.7822	0.00054221	1.0168	2.27586e-06	-0.2342	0.000551
Tb927.4.4410	Tb927.4.4410	356	-0.2055	1	-0.6092	0.444423	#N/A	#N/A	#N/A	#N/A	#N/A	-0.366	7.39e-08
Tb927.4.4420	Tb927.4.4420	442	-0.1734	1	-0.6918	0.2514	#N/A	#N/A	#N/A	#N/A	#N/A	-0.3336	1.54e-08
Tb927.4.4430	Tb927.4.4430	569	-0.1332	1	-0.732	0.222677	77	-0.111	1	-0.1781	0.842055	-0.4099	4.84e-12
Tb927.4.4440	Tb927.4.4440	556	-0.129	1	-0.7797	0.114701	#N/A	#N/A	#N/A	#N/A	#N/A	-0.33	1.76e-07
Tb927.4.4450	Tb927.4.4450	547	-0.1927	1	-0.4804	0.47664	#N/A	#N/A	#N/A	#N/A	#N/A	-0.3559	9.86e-09
Tb927.4.4460	Tb927.4.4460	390	-0.1448	1	-0.0218	0.987569	#N/A	#N/A	#N/A	#N/A	#N/A	-0.2916	2.9e-05
Tb927.4.4470	Tb927.4.4470	453	-0.0384	1	-0.1422	0.883523	#N/A	#N/A	#N/A	#N/A	#N/A	-0.2763	1.05e-05
Tb927.4.4480	Tb927.4.4480	582	0.7602	0.446657	0.9014	0.20385	1238	0.4177	0.238041	0.8202	0.000366306	-0.2236	0.00503
Tb927.4.4490	Tb927.4.4490	664	0.0221	1	0.6959	0.113757	490	-0.8064	0.0231676	-0.5955	0.139209	-0.2524	0.000236
Tb927.4.4500	Tb927.4.4500	625	0.5941	0.624243	1.6148	0.000491892	#N/A	#N/A	#N/A	#N/A	#N/A	-0.2539	0.00173
Tb927.4.4510	Tb927.4.4510	399	1.6709	3.80324e-08	1.4931	1.08364e-05	426	1.3453	0.000231948	1.4337	7.35737e-05	-0.393	1.31e-07
Tb927.4.4520	Tb927.4.4520	193	2.6966	1.0408e-14	1.7857	4.47937e-06	340	2.6749	2.6185e-06	2.4278	2.63641e-05	0.3174	0.00129
Tb927.4.4530	Tb927.4.4530	716	0.0605	1	-0.0815	0.938976	101	0.0748	1	0.3119	0.639764	0.1105	0.259
Tb927.4.4540	Tb927.4.4540	333	-0.2426	0.73715	-0.2383	0.547181	859	-0.3135	0.17847	-0.3546	0.0685906	-0.0812	0.486
Tb927.4.4550	Tb927.4.4550	1594	0.2525	1	0.4844	0.534854	1236	0.2284	0.966321	0.724	0.0159592	-0.1295	0.19
Tb927.4.4560	Tb927.4.4560	1398	-0.036	1	-0.3851	0.513038	1316	-0.0425	1	-0.1006	0.878331	-0.0858	0.325
Tb927.4.4570	Tb927.4.4570	937	-0.0259	1	-0.4799	0.35063	543	-0.1064	1	-0.1536	0.836204	0.5352	2.92e-15
Tb927.4.4580	Tb927.4.4580	429	1.1284	0.00785157	1.2457	0.0056682	#N/A	#N/A	#N/A	#N/A	#N/A	-0.6632	1.13e-21
Tb927.4.4590	Tb927.4.4590	377	0.1184	1	-0.491	0.627635	#N/A	#N/A	#N/A	#N/A	#N/A	0.0602	0.656
Tb927.4.4600	Tb927.4.4600	1617	-0.1355	1	-0.1697	0.721176	#N/A	#N/A	#N/A	#N/A	#N/A	0.3803	0.003
Tb927.4.4610	Tb927.4.4610	1310	-0.0785	1	-0.0409	0.935859	#N/A	#N/A	#N/A	#N/A	#N/A	0.2414	0.0691
Tb927.4.4620	Tb927.4.4620	4706	-0.1291	1	-0.0464	0.949629	6912	-0.1634	1	0.0262	0.975835	0.6828	3.18e-08
Tb927.4.4630	Tb927.4.4630	923	0.0114	1	0.0831	0.875726	118	0.059	1	0.029	0.977122	0.7023	4.49e-05
Tb927.4.4640	Tb927.4.4640	1071	-0.0296	1	-0.1569	0.771832	40	0.1629	1	-0.1697	0.859561	0.4419	0.00618
Tb927.4.4650	Tb927.4.4650	2655	-0.174	0.954904	-0.2186	0.554093	233	-0.0612	1	-0.1815	0.781128	-0.1326	0.297
Tb927.4.4660	Tb927.4.4660	928	-0.1352	1	-0.0644	0.916621	25	-0.171	1	0.1632	0.897342	-0.065	0.732
Tb927.4.4670	Tb927.4.4670	856	-0.0624	1	-0.1823	0.689746	#N/A	#N/A	#N/A	#N/A	#N/A	-0.2024	0.062
Tb927.4.4680	Tb927.4.4680	378	0.1504	1	0.1858	0.706315	121	0.2665	1	0.0901	0.923145	-0.079	0.708
Tb927.4.4690	Tb927.4.4690	1143	0.0291	1	0.1222	0.771966	385	0.0317	1	0.1743	0.777336	-0.1606	0.133
Tb927.4.4700	Tb927.4.4700	885	0.1151	1	0.0905	0.872119	679	0.1348	1	0.2127	0.742304	-0.2772	0.00196
Tb927.4.4710	Tb927.4.4710	822	-0.0349	1	-0.2489	0.452575	37	-0.1897	1	-0.1956	0.878254	-0.1823	0.0336
Tb927.4.4720	Tb927.4.4720	585	-0.0435	1	-0.2127	0.586013	34	-0.0953	1	-0.2499	0.806333	0.0682	0.665
Tb927.4.4730	Tb927.4.4730	2020	-0.1826	1	-0.3357	0.479446	2151	-0.2803	0.721502	-0.3001	0.45067	0.1432	0.0757
Tb927.4.4740	Tb927.4.4740	401	0.2889	1	0.3757	0.675509	73	0.2236	1	0.4813	0.421189	0.2065	0.0231
Tb927.4.4750	Tb927.4.4750	498	-0.1166	1	-0.0033	1	#N/A	#N/A	#N/A	#N/A	#N/A	0.1419	0.322
Tb927.4.4760	Tb927.4.4760	873	-0.029	1	-0.3043	0.13749	56	0.2834	1	-0.2231	0.792489	-0.0562	0.579
Tb927.4.4770	Tb927.4.4770	337	-0.0865	1	-0.1989	0.657828	#N/A	#N/A	#N/A	#N/A	#N/A	0.13	0.444
Tb927.4.4780	Tb927.4.4780	160	0.5454	0.346699	0.5225	0.318009	48	0.386	0.992125	0.5617	0.524343	-0.5711	3.59e-05
Tb927.4.4790	Tb927.4.4790	361	1.6863	5.65013e-13	2.9859	1.33563e-33	50	1.7647	1.26553e-05	2.8461	1.74879e-11	0.0626	0.627
Tb927.4.4810	Tb927.4.4810	405	1.088	0.00416646	1.7515	2.31464e-07	327	0.1304	1	0.2059	0.641083	1.0069	2.84e-21
Tb927.4.4815	Tb927.4.4815	392	0.1279	1	0.1232	0.807954	544	0.0652	1	0.2484	0.384352	0.2041	0.257
Tb927.4.4820	Tb927.4.4820	131	0.0888	1	0.1138	0.920864	#N/A	#N/A	#N/A	#N/A	#N/A	-0.1905	0.0796
Tb927.4.4830	Tb927.4.4830	283	-0.002	1	-0.2976	0.568056	#N/A	#N/A	#N/A	#N/A	#N/A	0.0828	0.444
Tb927.4.4840	Tb927.4.4840	125	0.0822	1	0.0235	0.986042	#N/A	#N/A	#N/A	#N/A	#N/A	-0.3132	0.00838
Tb927.4.4850	Tb927.4.4850	288	0.075	1	-0.0305	0.976572	#N/A	#N/A	#N/A	#N/A	#N/A	0.1465	0.168
Tb927.4.4860	Tb927.4.4860	163	0.133	1	-0.3328	0.564813	69	0.2513	1	0.3762	0.530136	-0.2931	0.000504
Tb927.4.4870	Tb927.4.4870	353	0.2324	0.998401	0.0299	0.976369	#N/A	#N/A	#N/A	#N/A	#N/A	0.0672	0.441
Tb927.4.4880	Tb927.4.4880	363	0.0195	1	-0.2982	0.791718	260	0.0557	1	0.1655	0.851389	-0.282	0.000542
Tb927.4.4890	Tb927.4.4890	287	0.0315	1	-0.3087	0.702622	#N/A	#N/A	#N/A	#N/A	#N/A	-0.1468	0.263
Tb927.4.4900	Tb927.4.4900	154	1.1643	0.000261491	1.4519	0.000612997	45	0.9745	0.220129	1.181	0.144002	-0.1566	0.106
Tb927.4.4910.1	Tb927.4.4910	1233	-0.1224	1	-0.2285	0.595963	538	-0.0467	1	-0.1424	0.705613	-0.2174	0.0128
Tb927.4.4910.2	Tb927.4.4910	1227	-0.1203	1	-0.2276	0.598303	538	-0.0467	1	-0.1424	0.705613	-0.2174	0.0128
Tb927.4.4920	Tb927.4.4920	277	0.3501	0.838254	0.0834	0.926074	#N/A	#N/A	#N/A	#N/A	#N/A	0.2928	0.0625
Tb927.4.4930	Tb927.4.4930	1111	0.0241	1	-0.2237	0.746748	457	-0.0237	1	-0.0562	0.956439	-0.0056	0.959
Tb927.4.4940	Tb927.4.4940	414	1.511	1.00024e-08	2.0588	5.15253e-13	523	0.8519	0.0832542	1.6124	1.12488e-05	1.6967	2.33e-69
Tb927.4.4950	Tb927.4.4950	835	-0.1719	0.958267	-0.288	0.379344	330	-0.3157	0.845079	-0.2078	0.745965	-0.1873	0.103
Tb927.4.4960	Tb927.4.4960	498	0.1372	1	-0.2176	0.675839	30	0.2165	1	0.3885	0.745965	0.1631	0.0967
Tb927.4.4970	Tb927.4.4970	344	-0.225	1	-0.3774	0.679452	518	-0.3354	0.580137	-0.4966	0.126244	0.1324	0.266
Tb927.4.4980	Tb927.4.4980	865	0.1691	1	0.3424	0.366803	307	0.2225	1	0.3528	0.494406	0.174	0.319
Tb927.4.4990	Tb927.4.4990	818	0.1721	0.998014	0.2738	0.478239	235	0.1585	1	0.1774	0.798235	0.562	4.55e-05
Tb927.4.5000	Tb927.4.5000	968	0.1151	1	-0.0832	0.889704	168	0.1367	1	0.1267	0.878331	0.0093	0.932
Tb927.4.5010	Tb927.4.5010	1770	0.1325	1	0.2841	0.698123	820	0.1076	1	0.3752	0.452075	-0.1822	0.00389
Tb927.4.5020	Tb927.4.5020	1403	0.1106	1	-0.054	0.949162	738	0.0538	1	0.0461	0.946276	0.018	0.843
Tb927.4.5030	Tb927.4.5030	618	0.043	1	-0.2896	0.534854	#N/A	#N/A	#N/A	#N/A	#N/A	-0.0411	0.767
Tb927.4.5040	Tb927.4.5040	900	0.0505	1	0.0174	0.983593	594	0.0158	1	0.0202	0.983593	0.2959	0.00224
Tb927.4.5050	Tb927.4.5050	522	-0.1542	1	-0.4195	0.264688	#N/A	#N/A	#N/A	#N/A	#N/A	0.0661	0.613
Tb927.4.5060	Tb927.4.5060	737	-0.1675	1	0.88	0.00242726	#N/A	#N/A	#N/A	#N/A	#N/A	1.4678	2.46e-30
Tb927.4.5070	Tb927.4.5070	474	-0.0358	1	-0.244	0.67172	#N/A	#N/A	#N/A	#N/A	#N/A	-0.0199	0.893
Tb927.4.5080	Tb927.4.5080	381	-0.3619	0.687228	-0.0625	0.93727	159	-0.4864	0.603331	-0.1325	0.881119	0.4007	0.0139
Tb927.4.5090	Tb927.4.5090	9	0.2362	1	0.2712	0.889704	122	0.016	1	-0.1429	0.879969	-0.4521	0.0621
Tb927.4.5100	Tb927.4.5100	1448	0.1324	1	0.2202	0.505864	76	0.1379	1	0.2647	0.733052	0.008	0.943
Tb927.4.5110	Tb927.4.5110	1315	0.1465	1	0.0639	0.929454	682	0.0583	1	0.2623	0.625729	0.1999	0.0343
Tb927.4.5120	Tb927.4.5120	976	0.0492	1	-0.0174	0.989282	#N/A	#N/A	#N/A	#N/A	#N/A	-0.0932	0.268
Tb927.4.5130	Tb927.4.5130	371	-0.0207	1	-0.1491	0.889704	#N/A	#N/A	#N/A	#N/A	#N/A	-0.3724	0.00278
Tb927.4.5140	Tb927.4.5140	123	0.349	0.481805	0.4151	0.270417	#N/A	#N/A	#N/A	#N/A	#N/A	0.1561	0.498
Tb927.4.5150	Tb927.4.5150	302	0.0332	1	0.1328	0.772696	104	0.0715	1	0.3675	0.513995	0.0337	0.868
Tb927.4.5160	Tb927.4.5160	749	-0.1077	1	-0.3422	0.330778	#N/A	#N/A	#N/A	#N/A	#N/A	-0.0335	0.796
Tb927.4.5170	Tb927.4.5170	988	-0.065	1	-0.0087	0.992883	229	-0.0981	1	-0.2179	0.64917	0.03	0.868
Tb927.4.5180	Tb927.4.5180	672	0.0536	1	-0.1858	0.708714	524	0.1225	1	0.0331	0.965728	-0.0411	0.693
Tb927.4.5190	Tb927.4.5190	818	-0.1071	1	-0.1311	0.756324	508	-0.1475	1	-0.0056	0.999394	0.3038	0.0715
Tb927.4.5200	Tb927.4.5200	2496	-0.0953	1	-0.4672	0.516377	264	-0.1159	1	-0.4196	0.692272	-0.0756	0.551
Tb927.4.5210	Tb927.4.5210	466	0.1	1	0.1996	0.781583	#N/A	#N/A	#N/A	#N/A	#N/A	-0.0483	0.748
Tb927.4.5220	Tb927.4.5220	1080	0.1943	1	0.1501	0.851099	509	0.1481	1	0.2694	0.603918	-0.034	0.761
Tb927.4.5230	Tb927.4.5230	1496	-0.0838	1	-0.167	0.674509	#N/A	#N/A	#N/A	#N/A	#N/A	-0.0296	0.823
Tb927.4.5240	Tb927.4.5240	627	0.0476	1	0.4425	0.390241	1106	-0.1596	0.966321	0.1573	0.684916	0.1254	0.32
Tb927.4.5250	Tb927.4.5250	534	-0.0563	1	-0.1642	0.851099	#N/A	#N/A	#N/A	#N/A	#N/A	0.0344	0.819
Tb927.4.5260	Tb927.4.5260	368	0.0377	1	-0.1312	0.883359	125	0.0979	1	-0.1639	0.788416	-0.1077	0.523
Tb927.4.5270	Tb927.4.5270	275	0.0086	1	-0.0479	0.965719	#N/A	#N/A	#N/A	#N/A	#N/A	0.1579	0.341
Tb927.4.5280	Tb927.4.5280	361	0.0988	1	-0.2983	0.71751	#N/A	#N/A	#N/A	#N/A	#N/A	-0.0851	0.57
Tb927.4.5290	Tb927.4.5290	345	0.1091	1	-0.0671	0.943302	120	0.1075	1	-0.1885	0.722097	0.1688	0.237
Tb927.4.5300	Tb927.4.5300	334	0.0144	1	-0.2299	0.7682	#N/A	#N/A	#N/A	#N/A	#N/A	0.0934	0.544
Tb927.4.5310	Tb927.4.5310	118	0.7637	0.332129	1.336	0.0263805	475	0.5336	0.820675	0.8674	0.226931	0.2423	0.00249
Tb927.4.5320	Tb927.4.5320	1828	0.0885	1	-0.0586	0.927109	321	0.0065	1	-0.0788	0.927879	0.064	0.492
Tb927.4.5330	Tb927.4.5330	496	0.237	1	0.0532	0.967369	426	0.206	1	0.1389	0.827817	0.0572	0.564
Tb927.4.5335	Tb927.4.5335	324	-0.0146	1	0.3472	0.323098	613	-0.1	1	0.0867	0.842688	0.3387	0.00831
Tb927.4.5340	Tb927.4.5340	898	-0.0972	1	-0.3531	0.504124	226	-0.0942	1	0.1173	0.883359	0.2088	0.0235
Tb927.4.5350	Tb927.4.5350	1118	-0.0016	1	-0.1577	0.802613	#N/A	#N/A	#N/A	#N/A	#N/A	0.1079	0.253
Tb927.4.5360	Tb927.4.5360	150	-0.0492	1	-0.2783	0.654969	#N/A	#N/A	#N/A	#N/A	#N/A	0.3002	0.0186
Tb927.4.5370	Tb927.4.5370	696	-0.1398	1	-0.082	0.87642	337	-0.2244	0.907056	0.072	0.905399	0.0362	0.798
Tb927.4.5380	Tb927.4.5380	1127	-0.0419	1	-0.1248	0.822712	#N/A	#N/A	#N/A	#N/A	#N/A	-0.1079	0.174
Tb927.4.5390	Tb927.4.5390	736	0.0699	1	0.0645	0.909153	156	-0.1323	1	0.0831	0.924237	0.3064	0.000498
Tb927.4.5400	Tb927.4.5400	0	-1.6217	1	0.8005	0.954023	#N/A	#N/A	#N/A	#N/A	#N/A	-0.059	0.92
Tb927.4.5410	Tb927.4.5410	0	-2.0636	1	0.8005	0.938191	#N/A	#N/A	#N/A	#N/A	#N/A	-1.379	0.243
Tb927.4.5420	Tb927.4.5420	0	0.7574	NA	0	NA	#N/A	#N/A	#N/A	#N/A	#N/A	-2.617	0.0453
Tb927.4.5430	Tb927.4.5430	2	0.2542	1	0.7242	0.906387	#N/A	#N/A	#N/A	#N/A	#N/A	-0.1088	0.788
Tb927.4.5440	Tb927.4.5440	1	-0.6584	1	-0.1612	0.987569	#N/A	#N/A	#N/A	#N/A	#N/A	-3.3949	0.00226
Tb927.4.5450	Tb927.4.5450	0	0.7793	NA	0	NA	0	#VALUE!	NA	#VALUE!	NA	0	0
Tb927.4.5460	Tb927.4.5460	0	#VALUE!	NA	#VALUE!	NA	0	#VALUE!	NA	#VALUE!	NA	0	0
Tb927.4.5470	Tb927.4.5470	0	-1.1442	NA	0.8005	NA	0	#VALUE!	NA	#VALUE!	NA	0	0
Tb927.4.5480	Tb927.4.5480	0	#VALUE!	NA	#VALUE!	NA	#N/A	#N/A	#N/A	#N/A	#N/A	-0.4255	NA
Tb927.4.5490	Tb927.4.5490	0	0.7793	NA	0	NA	#N/A	#N/A	#N/A	#N/A	#N/A	0	0
Tb927.4.5500	Tb927.4.5500	0	1.6871	1	0	1	0	#VALUE!	NA	#VALUE!	NA	0	0
Tb927.4.5510	Tb927.4.5510	0	#VALUE!	NA	#VALUE!	NA	#N/A	#N/A	#N/A	#N/A	#N/A	-1.3529	NA
Tb927.4.5520	Tb927.4.5520	0	-1.1442	NA	0.8005	NA	#N/A	#N/A	#N/A	#N/A	#N/A	0	0
Tb927.4.5530	Tb927.4.5530	1	2.0236	1	-0.1612	0.991042	#N/A	#N/A	#N/A	#N/A	#N/A	-0.0993	NA
Tb927.4.5540	Tb927.4.5540	1	-0.1743	1	-1.123	0.908698	#N/A	#N/A	#N/A	#N/A	#N/A	0.8173	NA
Tb927.4.5550	Tb927.4.5550	0	0.7793	NA	0	NA	0	#VALUE!	NA	#VALUE!	NA	0	0
Tb927.4.5560	Tb927.4.5560	0	-1.049	1	0.8005	0.957446	#N/A	#N/A	#N/A	#N/A	#N/A	-1.1512	NA
Tb927.4.5570	Tb927.4.5570	0	-1.9767	NA	0	NA	0	#VALUE!	NA	#VALUE!	NA	0	0
Tb927.4.5580	Tb927.4.5580	0	-2.0646	1	-1.123	0.925744	#N/A	#N/A	#N/A	#N/A	#N/A	0.649	NA
Tb927.4.5590	Tb927.4.5590	0	0.7793	NA	-1.123	NA	0	#VALUE!	NA	#VALUE!	NA	0	0
Tb927.4.5600	Tb927.4.5600	0	-2.6261	1	0	1	0	#VALUE!	NA	#VALUE!	NA	0.8173	NA
Tb927.4.5610	Tb927.4.5610	0	0.7793	NA	0	NA	0	#VALUE!	NA	#VALUE!	NA	0	0
Tb927.4.5620	Tb927.4.5620	0	#VALUE!	NA	#VALUE!	NA	0	#VALUE!	NA	#VALUE!	NA	0	0
Tb927.4.5630	Tb927.4.5630	0	0.7793	NA	0	NA	#N/A	#N/A	#N/A	#N/A	#N/A	0	0
Tb927.4.5640	Tb927.4.5640	0	0.7793	NA	-1.123	NA	#N/A	#N/A	#N/A	#N/A	#N/A	-0.2628	0.772
Tb927.4.5650	Tb927.4.5650	0	-1.6244	1	1.6946	0.853761	0	#VALUE!	NA	#VALUE!	NA	-0.0888	NA
Tb927.4.5660	Tb927.4.5660	0	0.7793	NA	0.8005	NA	#N/A	#N/A	#N/A	#N/A	#N/A	0.8173	NA
Tb927.4.5670	Tb927.4.5670	0	0	NA	0.8006	NA	0	#VALUE!	NA	#VALUE!	NA	1.2857	NA
Tb927.4.5680	Tb927.4.5680	0	-2.6055	1	0	1	0	#VALUE!	NA	#VALUE!	NA	0	0
Tb927.4.5690	Tb927.4.5690	0	1.5786	1	0.8005	0.95919	0	#VALUE!	NA	#VALUE!	NA	0	0
Tb927.4.5700	Tb927.4.5700	0	0.3773	1	0.8005	0.932438	#N/A	#N/A	#N/A	#N/A	#N/A	0.649	NA
Tb927.4.5710	Tb927.4.5710	0	1.2966	1	0	1	#N/A	#N/A	#N/A	#N/A	#N/A	0	0
Tb927.4.5720	Tb927.4.5720	0	-0.1987	1	-0.1612	0.992883	#N/A	#N/A	#N/A	#N/A	#N/A	-2.4419	NA
Tb927.4.5730	Tb927.4.5730	1	1.3025	1	-0.4292	0.96391	0	#VALUE!	NA	#VALUE!	NA	0	0
Tb927.4.5740	Tb927.4.5740	0	1.5786	1	0.8005	0.95919	0	#VALUE!	NA	#VALUE!	NA	-2.2361	NA
Tb927.4.5750	Tb927.4.5750	0	#VALUE!	NA	#VALUE!	NA	#N/A	#N/A	#N/A	#N/A	#N/A	0	0
Tb927.4.5760	Tb927.4.5760	0	0.6939	1	0.8005	0.957541	0	#VALUE!	NA	#VALUE!	NA	-1.3529	NA
Tb927.4.5770	Tb927.4.5770	0	#VALUE!	NA	#VALUE!	NA	#N/A	#N/A	#N/A	#N/A	#N/A	-0.2837	0.433
Tb927.4.5780	Tb927.4.5780	0	#VALUE!	NA	#VALUE!	NA	0	#VALUE!	NA	#VALUE!	NA	-1.1512	NA
Tb927.4.5790	Tb927.4.5790	0	0.7793	NA	0	NA	#N/A	#N/A	#N/A	#N/A	#N/A	-1.288	NA
Tb927.4.5800	Tb927.4.5800	0	-1.9767	1	0.8005	0.95919	#N/A	#N/A	#N/A	#N/A	#N/A	0	0
Tb927.5.100	Tb927.5.100	0	-1.1442	NA	0	NA	#N/A	#N/A	#N/A	#N/A	#N/A	0	0
Tb927.5.110	Tb927.5.110	1	0.251	1	0	1	#N/A	#N/A	#N/A	#N/A	#N/A	-0.0118	0.96
Tb927.5.120	Tb927.5.120	2	-1.4012	0.915304	-1.5308	0.73726	4	-1.2768	0.906825	0.91	0.845392	-2.0364	9.57e-39
Tb927.5.130	Tb927.5.130	1	-0.5834	1	0.8006	0.920575	#N/A	#N/A	#N/A	#N/A	#N/A	-0.2014	0.294
Tb927.5.140	Tb927.5.140	20	-0.0494	1	-1.4397	0.430691	#N/A	#N/A	#N/A	#N/A	#N/A	0.1119	0.431
Tb927.5.150	Tb927.5.150	48	-0.8487	0.839326	-1.0825	0.566297	45	-0.819	0.546612	-0.379	0.806333	-0.241	0.109
Tb927.5.160	Tb927.5.160	14	-0.2839	1	-0.5961	0.787261	#N/A	#N/A	#N/A	#N/A	#N/A	-0.1852	0.519
Tb927.5.170	Tb927.5.170	17	0.3313	1	0.4965	0.701395	#N/A	#N/A	#N/A	#N/A	#N/A	0.2026	0.523
Tb927.5.180	Tb927.5.180	0	0.7793	NA	0	NA	#N/A	#N/A	#N/A	#N/A	#N/A	-1.3564	NA
Tb927.5.190	Tb927.5.190	0	#VALUE!	NA	#VALUE!	NA	0	#VALUE!	NA	#VALUE!	NA	0.9496	NA
Tb927.5.200	Tb927.5.200	0	0.7793	NA	0.8005	NA	0	#VALUE!	NA	#VALUE!	NA	-1.674	NA
Tb927.5.210	Tb927.5.210	0	-1.1442	NA	0	NA	#N/A	#N/A	#N/A	#N/A	#N/A	-0.0278	0.988
Tb927.5.220	Tb927.5.220	0	#VALUE!	NA	#VALUE!	NA	#N/A	#N/A	#N/A	#N/A	#N/A	0	0
Tb927.5.230	Tb927.5.230	0	0	NA	-1.123	NA	#N/A	#N/A	#N/A	#N/A	#N/A	0	0
Tb927.5.240	Tb927.5.240	2	3.9231	0.504893	3.2713	0.502804	0	1.6554	NA	0	NA	-0.2457	NA
Tb927.5.250	Tb927.5.250	0	0.7793	NA	0	NA	#N/A	#N/A	#N/A	#N/A	#N/A	0	0
Tb927.5.260	Tb927.5.260	0	-0.0701	1	0	1	#N/A	#N/A	#N/A	#N/A	#N/A	-0.7108	0.155
Tb927.5.270	Tb927.5.270	0	-1.9767	1	-0.1612	0.997243	0	#VALUE!	NA	#VALUE!	NA	-1.9252	2.23e-08
Tb927.5.280	Tb927.5.280	10	-0.2671	1	0.1824	0.964207	20	-0.5504	0.9943	-0.4987	0.750997	-0.2359	0.705
Tb927.5.285b	Tb927.5.285b	382	0.496	0.444534	0.3251	0.625159	#N/A	#N/A	#N/A	#N/A	#N/A	1.2747	2.05e-60
Tb927.5.290	Tb927.5.290	164	0.6154	0.502374	1.6526	0.000236649	310	0.5049	0.586872	1.3004	0.000813518	0.0432	0.816
Tb927.5.291b	Tb927.5.291b	50	-0.151	1	0.0596	0.974621	#N/A	#N/A	#N/A	#N/A	#N/A	-0.1716	0.256
Tb927.5.292b	Tb927.5.292b	61	-0.2972	1	-0.2565	0.835399	#N/A	#N/A	#N/A	#N/A	#N/A	0.2856	0.103
Tb927.5.293b	Tb927.5.293b	17	-0.8876	0.679374	-1.3449	0.297128	14	-1.0149	0.404344	-1.1425	0.290316	-0.7812	9.08e-06
Tb927.5.294b	Tb927.5.294b	141	-0.0265	1	-0.162	0.798235	#N/A	#N/A	#N/A	#N/A	#N/A	-0.1576	0.394
Tb927.5.295b	Tb927.5.295b	1500	-0.0832	1	-0.1399	0.836984	#N/A	#N/A	#N/A	#N/A	#N/A	-0.1366	0.0738
Tb927.5.296b	Tb927.5.296b	54	0.7317	0.458784	0.6406	0.775431	#N/A	#N/A	#N/A	#N/A	#N/A	0.3	0.034
Tb927.5.297b	Tb927.5.297b	65	0.8281	0.577853	0.6791	0.600272	725	0.6402	0.181528	0.919	0.0100982	0.0417	0.892
Tb927.5.300	Tb927.5.300	505	0.8384	0.0618016	1.0735	0.00483644	197	0.8462	0.151949	1.2638	0.00475799	0.273	0.00805
Tb927.5.300b	Tb927.5.300b	389	0.9934	0.0163225	0.9819	0.0149394	365	0.9794	0.0350954	1.1026	0.00854308	0.2369	0.0362
Tb927.5.309b	Tb927.5.309b	140	0.7754	0.341801	0.7885	0.404307	342	0.5272	0.546612	1.0234	0.0178239	0.3401	9.72e-06
Tb927.5.310	Tb927.5.310	116	0.7893	0.168776	1.2327	0.0668008	388	0.4645	0.561008	1.0213	0.00569025	0.2343	0.00252
Tb927.5.320	Tb927.5.320	397	0.5165	0.210556	0.4274	0.36073	87	0.1519	1	0.158	0.903201	1.2476	2.01e-45
Tb927.5.330	Tb927.5.330	348	0.7656	0.0312138	0.0796	0.925744	194	0.918	0.0507758	1.3936	0.000706541	0.9608	5.83e-32
Tb927.5.340	Tb927.5.340	13	0.2139	1	-0.0367	0.992883	12	0.0486	1	0.6294	0.688578	0.3071	0.00329
Tb927.5.350	Tb927.5.350	50	0.5615	0.3842	0.0877	0.942456	54	0.0286	1	-0.2521	0.799799	0.2072	0.135
Tb927.5.360	Tb927.5.360	462	0.378	0.925041	0.3445	0.697099	92	0.0207	1	0.5358	0.431168	0.2627	0.00133
Tb927.5.370	Tb927.5.370	124	0.3554	0.90603	0.557	0.471942	36	0.3035	1	0.4572	0.707632	0.2331	0.0259
Tb927.5.380	Tb927.5.380	0	1.1247	1	0	1	10	0.8235	0.880919	0.6792	0.706315	0.2699	NA
Tb927.5.390	Tb927.5.390	313	0.3276	0.954904	0.4528	0.533198	136	0.4135	0.827316	0.2883	0.733331	0.1647	0.0998
Tb927.5.400	Tb927.5.400	111	0.2201	1	0.228	0.825732	137	0.0406	1	0.291	0.686831	0.2444	0.0804
Tb927.5.410	Tb927.5.410	199	0.8587	0.00880023	1.0897	0.000682841	#N/A	#N/A	#N/A	#N/A	#N/A	0.5332	1.78e-05
Tb927.5.420	Tb927.5.420	651	-0.2571	0.969382	-0.1228	0.871339	189	-0.2919	1	-0.082	0.937194	0.0742	0.484
Tb927.5.430	Tb927.5.430	264	0.184	1	0.0345	0.971182	#N/A	#N/A	#N/A	#N/A	#N/A	0.1531	0.218
Tb927.5.440	Tb927.5.440	3715	-0.5225	0.836216	-0.0826	0.955595	1026	-0.5169	0.898476	-0.0021	1	0.6161	1.89e-10
Tb927.5.450	Tb927.5.450	1737	0.1844	1	0.0658	0.94679	#N/A	#N/A	#N/A	#N/A	#N/A	0.5665	7.82e-10
Tb927.5.460	Tb927.5.460	160	-0.4312	0.73715	-0.2768	0.72	266	-0.3403	0.907191	-0.2462	0.752693	-0.1244	0.737
Tb927.5.470	Tb927.5.470	539	0.581	0.805549	0.9694	0.185465	149	0.5287	0.97518	1.0132	0.291202	1.1883	6.88e-35
Tb927.5.480	Tb927.5.480	144	0.8278	0.0724154	0.9772	0.0443973	290	0.7703	0.176584	1.0407	0.018661	0.4143	9.62e-05
Tb927.5.490	Tb927.5.490	366	-0.1318	1	-0.2955	0.732583	216	-0.1551	1	-0.0315	0.977639	-0.1595	0.0885
Tb927.5.500	Tb927.5.500	602	0.0939	1	-0.212	0.829933	180	0.0369	1	0.0897	0.918765	-0.0231	0.834
Tb927.5.510	Tb927.5.510	636	0.2226	1	0.1862	0.836009	2676	0.2488	0.99408	0.1748	0.805031	0.4253	0.000219
Tb927.5.520	Tb927.5.520	540	0.0168	1	0.1091	0.93727	317	-0.0374	1	0.3151	0.785953	-0.4099	5.27e-06
Tb927.5.530	Tb927.5.530	1439	0.0179	1	-0.0416	0.953231	618	-0.0423	1	0.0149	0.993318	0.0973	0.333
Tb927.5.540	Tb927.5.540	742	0.0236	1	-0.0691	0.941087	#N/A	#N/A	#N/A	#N/A	#N/A	-0.113	0.336
Tb927.5.550	Tb927.5.550	613	0.1573	1	-0.0828	0.924229	#N/A	#N/A	#N/A	#N/A	#N/A	0.1225	0.217
Tb927.5.560	Tb927.5.560	1898	0.124	1	-0.0645	0.945507	#N/A	#N/A	#N/A	#N/A	#N/A	0.0977	0.319
Tb927.5.570	Tb927.5.570	1414	0.0459	1	-0.4002	0.667024	1142	-0.0109	1	0.0195	0.993213	-0.0013	0.989
Tb927.5.580	Tb927.5.580	1794	0.0962	1	0.2981	0.706315	366	0.1228	1	0.3286	0.638235	0.0391	0.731
Tb927.5.590	Tb927.5.590	1388	-0.0112	1	0.0463	0.947212	345	-0.0303	1	0.2755	0.73726	0.1791	0.0562
Tb927.5.600	Tb927.5.600	1637	-0.0075	1	0.287	0.613772	295	-0.0633	1	0.3486	0.558132	0.0175	0.894
Tb927.5.610	Tb927.5.610	138	0.3506	1	0.0629	0.977515	1464	-0.1521	1	-0.2107	0.63304	-0.817	9.84e-33
Tb927.5.620	Tb927.5.620	57	-0.1695	1	0.0532	0.985164	25	-0.5581	0.813826	0.2693	0.88154	-0.4125	4.2e-05
Tb927.5.630	Tb927.5.630	252	0.5391	0.225225	0.2664	0.694186	289	0.5942	0.0368503	1.0051	9.38185e-06	0.4386	2.89e-11
Tb927.5.640	Tb927.5.640	398	-0.5223	0.237396	-1.0868	0.000292686	981	-0.0533	1	-0.1358	0.740231	-0.0105	0.92
Tb927.5.650	Tb927.5.650	217	0.4755	0.761056	0.1574	0.880691	208	-0.4505	0.244239	-0.0761	0.906387	0.747	2.98e-20
Tb927.5.660.1	Tb927.5.660	300	-0.5295	0.501302	-0.4336	0.508627	93	-0.3387	0.930014	-0.5152	0.402385	0.173	0.151
Tb927.5.660.2	Tb927.5.660	283	-0.4637	0.681135	-0.3285	0.663882	93	-0.3387	0.930014	-0.5152	0.402385	0.173	0.151
Tb927.5.670	Tb927.5.670	1621	-0.1144	1	-0.24	0.579214	#N/A	#N/A	#N/A	#N/A	#N/A	0.0754	0.368
Tb927.5.680.1	Tb927.5.680	1532	-0.1151	1	-0.1621	0.845497	301	-0.2993	1	-0.2101	0.836984	0.1671	0.163
Tb927.5.680.2	Tb927.5.680	2776	-0.0946	1	-0.1836	0.791718	301	-0.2993	1	-0.2101	0.836984	0.1671	0.163
Tb927.5.690	Tb927.5.690	344	-0.0583	1	0.0523	0.949629	1647	0.0271	1	-0.0211	0.978544	0.0925	0.511
Tb927.5.700	Tb927.5.700	3719	0.0792	1	-0.0458	0.940717	1702	0.0823	1	0.207	0.653623	0.1836	0.00818
Tb927.5.710	Tb927.5.710	1966	-0.0134	1	-0.3927	0.55431	#N/A	#N/A	#N/A	#N/A	#N/A	0.1353	0.112
Tb927.5.720	Tb927.5.720	1073	-0.0558	1	0.0125	0.990133	243	-0.1477	1	0.0634	0.936184	0.0059	0.966
Tb927.5.730	Tb927.5.730	835	-0.0196	1	-0.0687	0.870745	982	0.0982	1	-0.0887	0.909471	-0.0104	0.939
Tb927.5.740	Tb927.5.740	2387	-0.6533	0.134	-0.7504	0.0401672	1390	-0.6445	0.155071	-0.6587	0.10086	-0.4781	3.96e-06
Tb927.5.750	Tb927.5.750	903	-0.0117	1	-0.094	0.868961	#N/A	#N/A	#N/A	#N/A	#N/A	0.05	0.755
Tb927.5.760	Tb927.5.760	1071	1.3354	2.85692e-05	2.2109	1.01955e-13	3662	1.2462	0.00310737	1.4254	0.00026592	-0.0123	0.906
Tb927.5.770	Tb927.5.770	1738	0.0427	1	-0.2035	0.760441	#N/A	#N/A	#N/A	#N/A	#N/A	0.0969	0.351
Tb927.5.780	Tb927.5.780	2146	0.2573	0.818421	0.0206	0.980145	1013	0.1419	1	-0.0283	0.974609	0.1879	0.0402
Tb927.5.790	Tb927.5.790	488	-0.1241	1	0.9347	0.125376	680	-0.4252	0.754528	-0.1087	0.908698	0.279	0.000404
Tb927.5.800	Tb927.5.800	1275	-0.1098	1	0.6	0.577967	330	0.0181	1	0.4646	0.750315	0.1059	0.222
Tb927.5.810	Tb927.5.810	732	0.8127	0.135762	0.9982	0.0260016	2399	0.5672	0.642821	0.9376	0.0869307	-0.2883	9.97e-06
Tb927.5.820	Tb927.5.820	758	-0.1255	1	-0.1629	0.77516	852	-0.16	1	-0.1673	0.831015	-0.0982	0.48
Tb927.5.830	Tb927.5.830	822	0.0526	1	-0.0283	0.972149	#N/A	#N/A	#N/A	#N/A	#N/A	-0.0114	0.931
Tb927.5.840	Tb927.5.840	1429	-0.3516	0.883365	-0.4386	0.487966	141	-0.3382	1	-0.2596	0.84282	-0.4029	1.97e-05
Tb927.5.850	Tb927.5.850	1081	-0.121	1	-0.0282	0.973029	1725	0.1369	1	0.2839	0.601129	-0.1441	0.168
Tb927.5.860	Tb927.5.860	2646	-0.2394	1	-0.2922	0.691927	2173	-0.2691	0.802766	-0.1913	0.706315	-0.162	0.0214
Tb927.5.890	Tb927.5.890	1554	0.3204	0.900398	-0.011	0.997243	526	0.2526	0.786069	0.0256	0.972593	0.0448	0.627
Tb927.5.900	Tb927.5.900	1517	0.363	0.804797	0.1933	0.800316	#N/A	#N/A	#N/A	#N/A	#N/A	0.3216	4.61e-06
Tb927.5.910	Tb927.5.910	1425	0.4225	0.553648	0.2289	0.722753	1189	-0.1292	1	-0.0937	0.908601	0.475	7.09e-14
Tb927.5.920	Tb927.5.920	2124	-0.381	0.665909	-0.5184	0.224564	#N/A	#N/A	#N/A	#N/A	#N/A	0.1837	0.123
Tb927.5.930	Tb927.5.930	2041	-0.0476	1	-0.4399	0.574246	969	-0.0946	1	-0.2712	0.761555	0.1054	0.205
Tb927.5.940	Tb927.5.940	3241	0.1339	1	-0.0398	0.961035	924	0.1256	1	0.057	0.958195	0.2005	0.0106
Tb927.5.950	Tb927.5.950	1264	-0.1769	1	-0.0495	0.950183	#N/A	#N/A	#N/A	#N/A	#N/A	0.0103	0.944
Tb927.5.960	Tb927.5.960	2017	0.021	1	0.0954	0.865567	36	-0.0044	1	-0.0375	0.982372	-0.0462	0.654
Tb927.5.970	Tb927.5.970	3047	-0.0213	1	0.0471	0.941509	453	-0.122	1	-0.0171	0.98888	0.1707	0.0465
Tb927.5.980	Tb927.5.980	3075	0.0004	1	-0.1543	0.828429	#N/A	#N/A	#N/A	#N/A	#N/A	0.2559	0.00779
Tb927.5.990	Tb927.5.990	1026	0.0811	1	-0.2141	0.6666	#N/A	#N/A	#N/A	#N/A	#N/A	0.2568	0.0502
Tb927.5.1000	Tb927.5.1000	1296	0.201	1	0.0897	0.935844	6253	0.1406	1	0.2588	0.704425	-0.1337	0.0596
Tb927.5.1010	Tb927.5.1010	1630	-0.0317	1	-0.4207	0.573147	722	-0.0802	1	-0.3464	0.761174	0.075	0.401
Tb927.5.1020	Tb927.5.1020	2748	0.0973	1	-0.0048	1	620	0.0115	1	0.1581	0.869347	0.1325	0.0946
Tb927.5.1030	Tb927.5.1030	938	-0.02	1	0.0767	0.919477	#N/A	#N/A	#N/A	#N/A	#N/A	0.3042	0.0321
Tb927.5.1040	Tb927.5.1040	406	0.0425	1	0.1205	0.818138	129	0.0495	1	0.0528	0.955595	-0.0985	0.562
Tb927.5.1050	Tb927.5.1050	608	0.1322	1	0.3117	0.681113	2194	-0.1613	1	0.1421	0.875203	0.9335	1.26e-13
Tb927.5.1060	Tb927.5.1060	1996	-0.1503	0.987823	-0.1298	0.748643	3161	-0.2643	1	-0.1725	0.849573	0.3723	3.37e-05
Tb927.5.1070	Tb927.5.1070	996	1.1624	9.14671e-05	1.4109	9.84333e-07	155	1.1181	0.00230108	1.678	9.7568e-07	0.6451	4.08e-19
Tb927.5.1080	Tb927.5.1080	296	-0.2615	0.728591	-0.3453	0.33369	519	-0.4157	0.59465	-0.4375	0.380552	-0.2393	0.187
Tb927.5.1090	Tb927.5.1090	1515	0.1431	1	-0.4098	0.35766	#N/A	#N/A	#N/A	#N/A	#N/A	0.0312	0.735
Tb927.5.1100	Tb927.5.1100	1141	0.0095	1	-0.4947	0.551791	#N/A	#N/A	#N/A	#N/A	#N/A	-0.0392	0.713
Tb927.5.1110	Tb927.5.1110	42944	-0.4518	0.487768	-0.452	0.349977	37065	-0.5602	0.446657	-0.5195	0.381364	-0.131	0.066
Tb927.5.1120	Tb927.5.1120	2050	0.2338	1	0.486	0.603918	308	0.2076	1	0.2801	0.824652	-0.0035	0.977
Tb927.5.1130	Tb927.5.1130	966	1.3373	1.36243e-06	4.5477	6.37829e-64	1321	-0.0896	1	0.1971	0.852597	0.506	3.02e-08
Tb927.5.1140	Tb927.5.1140	1723	0.6481	0.0870031	2.0553	2.05262e-15	#N/A	#N/A	#N/A	#N/A	#N/A	0.0437	0.625
Tb927.5.1145	Tb927.5.1145	170	0.2823	0.833401	0.0281	0.976369	1016	0.1401	1	0.2258	0.679783	0.1103	0.624
Tb927.5.1150	Tb927.5.1150	3458	-0.4792	0.633373	-0.6646	0.18952	871	-0.4882	0.63945	-0.5863	0.303568	-0.4981	1.91e-12
Tb927.5.1160	Tb927.5.1160	2011	0.022	1	0.001	1	#N/A	#N/A	#N/A	#N/A	#N/A	-0.1309	0.0702
Tb927.5.1170	Tb927.5.1170	941	-0.0532	1	-0.1515	0.818278	#N/A	#N/A	#N/A	#N/A	#N/A	0.1473	0.359
Tb927.5.1180	Tb927.5.1180	3230	0.04	1	-0.0961	0.878791	312	0.0245	1	0.0559	0.961035	0.0442	0.669
Tb927.5.1200	Tb927.5.1200	1753	-0.0621	1	-0.0193	0.988682	594	-0.0779	1	-0.1113	0.921634	-0.0777	0.538
Tb927.5.1210	Tb927.5.1210	3078	0.0407	1	0.3552	0.672953	1708	-0.001	1	0.6287	0.344124	0.0516	0.56
Tb927.5.1220	Tb927.5.1220	683	0.0192	1	-0.0908	0.884055	230	0.0562	1	0.1658	0.836605	0.1555	0.272
Tb927.5.1230	Tb927.5.1230	930	0.2103	1	0.4903	0.469737	256	0.3441	0.957536	0.2874	0.735855	0.0559	0.713
Tb927.5.1240	Tb927.5.1240	1436	-0.0026	1	-0.0451	0.952548	215	-0.1065	1	0.0536	0.964743	0.1281	0.213
Tb927.5.1250	Tb927.5.1250	2509	0.0137	1	-0.1483	0.743925	1618	-0.0319	1	-0.0102	0.997572	0.2238	0.00136
Tb927.5.1260	Tb927.5.1260	182	0.9196	0.00285463	1.2003	0.000687716	285	0.7966	0.145522	1.0243	0.0241824	-0.0617	0.469
Tb927.5.1270	Tb927.5.1270	1053	0.1483	1	0.0074	0.997243	768	0.0956	1	0.0826	0.888704	-0.1021	0.436
Tb927.5.1280	Tb927.5.1280	1769	0.0178	1	-0.1396	0.857252	#N/A	#N/A	#N/A	#N/A	#N/A	0.0972	0.367
Tb927.5.1290	Tb927.5.1290	1094	0.2675	0.590005	0.0579	0.910192	#N/A	#N/A	#N/A	#N/A	#N/A	0.148	0.109
Tb927.5.1300	Tb927.5.1300	1625	0.013	1	-0.0801	0.909789	#N/A	#N/A	#N/A	#N/A	#N/A	0.0259	0.777
Tb927.5.1310	Tb927.5.1310	1656	-0.0491	1	-0.383	0.392762	#N/A	#N/A	#N/A	#N/A	#N/A	0.3402	9.22e-05
Tb927.5.1320	Tb927.5.1320	1517	-0.0538	1	-0.2421	0.618993	311	-0.0337	1	-0.0679	0.93727	-0.0301	0.747
Tb927.5.1330	Tb927.5.1330	2085	-0.0104	1	-0.2845	0.75877	#N/A	#N/A	#N/A	#N/A	#N/A	0.1613	0.0398
Tb927.5.1340	Tb927.5.1340	1427	-0.1065	1	-0.372	0.543235	266	-0.0632	1	-0.2224	0.843985	0.128	0.133
Tb927.5.1350	Tb927.5.1350	1594	-0.083	1	-0.1562	0.706315	128	-0.0684	1	-0.2172	0.766455	0.08	0.458
Tb927.5.1360	Tb927.5.1360	801	0.2815	0.984492	0.2513	0.731893	1331	0.2239	1	0.217	0.742345	-0.2799	0.00211
Tb927.5.1370	Tb927.5.1370	466	-0.0079	1	0.3438	0.59707	#N/A	#N/A	#N/A	#N/A	#N/A	0.3616	0.00172
Tb927.5.1380	Tb927.5.1380	398	0.0978	1	-0.1399	0.82267	244	-0.0623	1	-0.0754	0.884317	-0.0441	0.74
Tb927.5.1390	Tb927.5.1390	1	-0.6248	1	0.8006	0.909471	#N/A	#N/A	#N/A	#N/A	#N/A	-0.9098	2.51e-09
Tb927.5.1400	Tb927.5.1400	1	-0.722	1	1.709	0.801506	#N/A	#N/A	#N/A	#N/A	#N/A	-1.0405	7.16e-10
Tb927.5.1410	Tb927.5.1410	2	-0.3079	1	1.7417	0.701395	#N/A	#N/A	#N/A	#N/A	#N/A	-0.9255	7.28e-14
Tb927.5.1420	Tb927.5.1420	4	-0.2286	1	0.0419	0.998233	#N/A	#N/A	#N/A	#N/A	#N/A	-0.8374	7.7e-08
Tb927.5.1430	Tb927.5.1430	1	-0.6477	1	-2.1418	0.725306	#N/A	#N/A	#N/A	#N/A	#N/A	-1.01	1.44e-17
Tb927.5.1440	Tb927.5.1440	4	-0.365	1	0.7388	0.885627	#N/A	#N/A	#N/A	#N/A	#N/A	-0.9035	3.76e-10
Tb927.5.1450	Tb927.5.1450	1737	0.6401	0.149284	0.4398	0.391963	403	0.6536	0.108086	0.5886	0.138693	0.2831	0.00088
Tb927.5.1460	Tb927.5.1460	2414	0.3305	0.639658	1.0193	4.58677e-05	1876	-0.0379	1	0.3008	0.620522	-0.1968	0.0154
Tb927.5.1470	Tb927.5.1470	1235	-0.0809	1	-0.0351	0.972983	1741	-0.1318	1	0.1146	0.902408	0.3826	2.85e-06
Tb927.5.1480	Tb927.5.1480	100	2.4715	1.50188e-06	2.4747	1.51471e-05	634	2.0035	1.13037e-08	1.517	3.88814e-05	-0.666	7.78e-09
Tb927.5.1490	Tb927.5.1490	278	2.3345	1.38585e-14	3.2618	3.27254e-20	80	2.127	3.30176e-06	3.9079	1.06272e-13	-0.0111	0.923
Tb927.5.1500.1	Tb927.5.1500	468	0.08	1	-0.1904	0.694186	418	-0.0483	1	0.0667	0.946277	0.2941	0.0122
Tb927.5.1500.2	Tb927.5.1500	469	0.0844	1	-0.189	0.698123	418	-0.0483	1	0.0667	0.946277	0.2941	0.0122
Tb927.5.1510	Tb927.5.1510	1984	-0.127	1	-0.0787	0.908538	777	0.0122	1	-0.0218	0.979291	-0.0985	0.494
Tb927.5.1520	Tb927.5.1520	1339	-0.0289	1	-0.4742	0.577187	1562	-0.0356	1	-0.071	0.928886	-0.1691	0.0175
Tb927.5.1530	Tb927.5.1530	2153	-0.03	1	-0.2294	0.63619	282	-0.042	1	0.1094	0.906818	0.0437	0.665
Tb927.5.1540	Tb927.5.1540	1369	0.1578	1	-0.069	0.926475	71	0.3031	1	0.1623	0.892145	-0.0612	0.572
Tb927.5.1550	Tb927.5.1550	931	0.1612	1	-0.1601	0.850703	1126	0.1475	1	-0.0072	0.997933	-0.2139	0.00831
Tb927.5.1560	Tb927.5.1560	1848	-0.3505	0.835531	-0.3987	0.500866	548	-0.3744	0.979636	-0.5934	0.43608	-0.4654	6.59e-10
Tb927.5.1570	Tb927.5.1570	237	0.5477	0.48338	1.0477	0.0221699	1947	0.1044	1	-0.0335	0.97307	-0.0705	0.591
Tb927.5.1580	Tb927.5.1580	564	0.0666	1	-0.2168	0.815098	1128	0.0386	1	0.0172	0.988815	0.0002	0.999
Tb927.5.1590	Tb927.5.1590	1028	0.1232	1	0.2121	0.490267	255	0.0473	1	0.2443	0.711554	0.2898	0.0121
Tb927.5.1600	Tb927.5.1600	851	0.3392	0.527361	0.4783	0.128367	838	0.2279	0.994489	0.377	0.434877	-0.1195	0.181
Tb927.5.1610	Tb927.5.1610	75760	-0.3453	0.683243	-0.3706	0.423156	12574	-0.3443	0.835531	-0.3843	0.509831	-0.1428	0.0522
Tb927.5.1620	Tb927.5.1620	1268	-0.1388	1	-0.1283	0.766849	376	-0.0866	1	-0.0806	0.914959	-0.0923	0.491
Tb927.5.1630	Tb927.5.1630	2013	0.0227	1	-0.1055	0.885697	1466	-0.0048	1	-0.0193	0.989685	0.2866	0.0015
Tb927.5.1640	Tb927.5.1640	1385	0.3252	0.662981	0.1068	0.866771	500	0.2938	0.92479	0.3967	0.486942	-0.0425	0.703
Tb927.5.1650	Tb927.5.1650	681	1.3611	1.67935e-07	1.6135	7.87271e-10	#N/A	#N/A	#N/A	#N/A	#N/A	-0.025	0.803
Tb927.5.1660	Tb927.5.1660	3737	0.2882	1	1.285	0.000837544	1123	-0.8087	0.228097	-0.2414	0.806871	0.041	0.742
Tb927.5.1670	Tb927.5.1670	1361	-0.3331	0.811938	-0.6809	0.0690121	#N/A	#N/A	#N/A	#N/A	#N/A	-0.3071	0.00203
Tb927.5.1680	Tb927.5.1680	2030	-0.2976	1	-0.7748	0.274264	483	-0.2646	1	-0.4807	0.689229	-0.5024	2.1e-14
Tb927.5.1690	Tb927.5.1690	799	-0.1161	1	-0.2377	0.626009	956	-0.1409	1	-0.2726	0.681493	-0.2884	0.0139
Tb927.5.1700	Tb927.5.1700	774	0.1661	1	0.5419	0.335971	2432	-0.0838	1	0.1781	0.800316	0.3709	2.28e-06
Tb927.5.1710	Tb927.5.1710	5528	-0.5486	0.218896	-0.3136	0.561966	2730	-0.5516	0.415983	-0.2678	0.712669	-0.0143	0.918
Tb927.5.1720	Tb927.5.1720	4023	-0.2695	0.778973	-0.4465	0.168042	#N/A	#N/A	#N/A	#N/A	#N/A	-0.0466	0.607
Tb927.5.1730	Tb927.5.1730	1281	0.0878	1	0.299	0.622853	544	-0.0968	1	0.0297	0.977199	0.0145	0.916
Tb927.5.1740	Tb927.5.1740	1253	-0.1303	1	-0.0015	1	1007	-0.1873	1	-0.1007	0.914959	-0.427	0.0001
Tb927.5.1750	Tb927.5.1750	1814	-0.225	1	-0.5314	0.35267	418	-0.2509	1	-0.4523	0.57346	-0.1733	0.0952
[truncated: 9,237 more rows]

## Sheet: 2. RPM with 3UTR
GeneID	67_1_WC-dox_CDS	71_1_WC-dox_CDS	75_1_WC-dox_CDS	68_1_Cyt-dox_CDS	72_1_Cyt-dox_CDS	76_1_Cyt-dox_CDS	69_1_WC+dox_CDS	73_1_WC+dox_CDS	77_1_WC+dox_CDS	70_1_Cyt +dox_CDS	74_1_Cyt +dox_CDS	78_1_Cyt +dox_CDS	67_1_WC-dox-UTR	71_1_WC-dox-UTR	75_1_WC-dox-UTR	68_1_Cyt-dox-UTR	72_1_Cyt-dox-UTR	76_1_Cyt-dox-UTR	69_1_WC+dox-UTR	73_1_WC+dox-UTR	77_1_WC+dox-UTR	70_1_Cyt +dox-UTR	74_1_Cyt +dox-UTR	78_1_Cyt +dox-UTR	67_1_WC-dox CDS/UTR	71_1_WC-dox CDS/UTR	75_1_WC-dox CDS/UTR	68_1_Cyt-dox CDS/UTR	72_1_Cyt-dox CDS/UTR	76_1_Cyt-dox CDS/UTR	69_1_WC+dox CDS/UTR	73_1_WC+dox CDS/UTR	77_1_WC+dox CDS/UTR	70_1_Cyt +dox CDS/UTR	74_1_Cyt +dox CDS/UTR	78_1_Cyt +dox CDS/UTR	average WC- CDS/cyt-CDS +dox/-dox	average WC- CDS/UTR +dox/-dox	average_Cyt- CDS/UTR +dox/-dox	average +/- dox ratio cyto/ ratio wc	average WC- CDS/UTR +dox/-dox >2	average WC- CDS/UTR +dox/-dox >2 FDR<0.05	average_Cyt- CDS/UTR +dox/-dox >2 FDR<0.05	WC vs cyt FDR<0.05	FDR WC- CDS/UTR +dox/-dox	FDR_Cyt- CDS/UTR +dox/-dox	FDR WC vs cyt
Tb927.11.16820	10.62	9.32	5.59	1.96	1.26	0.63	29.09	36.79	31.59	24.73	34.97	30.9	71.47	57.77	36.13	36.7	40.71	35.77	42.26	33.46	40.93	22.24	46.02	40.51	0.15	0.16	0.15	0.05	0.03	0.02	0.69	1.1	0.77	1.11	0.76	0.76	6.63	5.57	26.3	4.72	1	0	1	0	0.421539	0.0182119	0.901804
Tb927.5.1130	26.06	31.7	32.03	3.14	2.47	2.64	63.42	96.75	81.04	52.4	89.95	71.59	93.75	109.14	111.06	29.73	22.61	12.21	78.51	92.47	142.81	14.62	43.43	22.56	0.28	0.29	0.29	0.11	0.11	0.22	0.81	1.05	0.57	3.58	2.07	3.17	10.88	2.83	20.05	7.08	1	0	1	1	0.523587	0.0316496	0.0425588
Tb927.10.12780	2.74	2.23	3.53	0.44	0.44	0.63	15.8	26.3	11.05	10.66	23.21	10.31	14.24	12.84	11.26	12.29	13.54	17.08	16.26	22.39	18.83	14.27	31.78	21.15	0.19	0.17	0.31	0.04	0.03	0.04	0.97	1.17	0.59	0.75	0.73	0.49	5.63	4.07	17.91	4.4	1	0	1	0	0.475001	0.0183994	0.289571
Tb927.1.4490	26.81	14.05	8.2	2.7	0.34	0.34	51	63.17	40.85	33.92	46.27	24.59	102.97	57.13	33.51	23.06	11.26	12.44	90.34	100.37	74.78	50.27	90.87	48.09	0.26	0.25	0.24	0.12	0.03	0.03	0.56	0.63	0.55	0.67	0.51	0.51	14.51	2.32	9.39	4.05	1	0	1	0	0.223322	0.00315356	0.802702
Tb927.4.1000	8.8	9.58	6.81	1.13	0.53	0.52	14.34	16.96	19.43	9.29	8.06	6.88	86.57	82.68	59.52	58.41	63.27	50.28	124.91	117.62	134.95	59.15	90.11	71.12	0.1	0.12	0.11	0.02	0.01	0.01	0.11	0.14	0.14	0.16	0.09	0.1	11.56	1.18	8.75	7.42	0	0	1	0	0.737552	0.0398941	0.630362
Tb927.10.15620	2.08	1.76	0.92	0.7	0.68	0.52	12.08	16.21	15.39	6.4	12.06	7.39	8.76	7.13	7.07	6.41	5.43	4.53	16.97	19.59	20.46	6.14	15.56	6.88	0.24	0.25	0.13	0.11	0.13	0.11	0.71	0.83	0.75	1.04	0.78	1.07	2.51	3.69	8.26	2.24	1	0	1	0	0.0970363	0.0122127	0.162634
Tb927.8.4300	4.98	3.91	4.06	1.92	0.73	0.92	32.15	43.46	35.33	14.52	48.85	17.47	9.38	8.08	7.59	6.97	4.76	3.9	21.11	20.78	20.87	10.36	21.84	10.5	0.53	0.48	0.53	0.28	0.15	0.24	1.52	2.09	1.69	1.4	2.24	1.66	3.63	3.44	7.91	2.3	1	0	1	0	0.369398	0.0227592	1.00059
Tb927.8.7790	21.12	19.59	15.4	7.28	3.4	1.32	66.55	69.8	57.8	50.12	78.35	49.12	61.51	60.13	51.01	33.3	26.49	15.42	97.99	81.89	87.05	46	75.1	47.15	0.34	0.33	0.3	0.22	0.13	0.09	0.68	0.85	0.66	1.09	1.04	1.04	4.68	2.26	7.2	3.19	1	0	1	1	0.365678	0.000537357	0.0351248
Tb04.3I12.100	4.81	3.95	4.49	2.4	1.41	1.43	10.91	12.22	12.64	13.05	21.23	19.17	2.82	1.55	1.75	1.18	0.53	0.34	3.26	3.17	3.19	0.71	1.01	0.8	1.71	2.55	2.57	2.03	2.66	4.21	3.35	3.85	3.96	18.38	21.02	23.96	2.53	1.63	7.12	4.37	0	0	1	1	0.367591	0.00768174	0.0184335
Tb927.11.16780	1.87	1.68	1.31	0.35	0.19	0.23	15.72	18.89	23.28	5.99	13.18	8.15	4.94	5.58	3.45	3.01	2.47	3.15	21.07	26.71	27.32	9.44	24.48	11.87	0.38	0.3	0.38	0.12	0.08	0.07	0.75	0.71	0.85	0.63	0.54	0.69	6.31	2.18	6.89	3.16	1	0	1	0	0.166191	0.00375099	0.078097
Tb927.4.2500	23.99	23.45	22.3	5.14	1.5	1.49	70.4	83.75	113.22	40.21	22.4	32.73	29.38	31.18	27.14	19.57	15.77	13.13	39.09	41.89	64.14	29.3	29.65	34.62	0.82	0.75	0.82	0.26	0.1	0.11	1.8	2	1.77	1.37	0.76	0.95	8.58	2.33	6.55	2.81	1	0	1	1	0.170026	0.0424171	0.0401944
Tb927.9.10950	7.35	5.28	6.76	1.83	0.87	0.46	28.38	39.67	26.69	9.65	20.42	7.25	24.53	22.08	23.35	16.87	16.55	12.61	43.02	58.68	48.08	23.81	48.3	25.43	0.3	0.24	0.29	0.11	0.05	0.04	0.66	0.68	0.56	0.41	0.42	0.29	6.14	2.29	5.6	2.45	1	0	1	1	0.212889	0.0146036	0.0201055
Tb927.9.11030	5.23	4.42	3.8	0.96	0.53	0.29	28.13	33.13	30.21	15.38	16.67	10.22	9.75	10.39	8.29	6.84	6.31	4.64	35.49	46.01	39.08	22.29	36.59	24.82	0.54	0.43	0.46	0.14	0.08	0.06	0.79	0.72	0.77	0.69	0.46	0.41	7.56	1.59	5.57	3.5	0	0	1	0	0.211539	0.0343673	0.112346
Tb927.8.7720	9.71	6.79	7.99	3.09	0.53	0.11	16.89	17.98	16.79	6.96	8.82	4.33	46.98	39.65	40.54	29.99	22.32	15.88	45.73	48.19	48.57	25.59	40.54	19.73	0.21	0.17	0.2	0.1	0.02	0.01	0.37	0.37	0.35	0.27	0.22	0.22	6.57	1.88	5.46	2.9	0	0	1	1	0.119441	0.0173861	0.0192863
Tb927.8.4500	22.58	20.66	19.72	8.33	3.2	2.12	43.22	41.24	65.99	26.25	20.58	30.19	58.81	49.1	42.77	40.06	37.85	35.2	47.15	41.65	66.77	40.98	46.27	49.55	0.38	0.42	0.46	0.21	0.08	0.06	0.92	0.99	0.99	0.64	0.44	0.61	4.61	2.3	4.83	2.1	1	1	1	1	0.0390961	0.00974154	0.024007
Tb927.7.6710	14.77	13.92	14.79	10.64	8.44	6.31	22.91	27.24	24.1	15.13	28.99	20.77	7.68	9.15	9.78	7.1	5.77	6.59	3.72	4.81	5.15	3.66	3.55	3.2	1.92	1.52	1.51	1.5	1.46	0.96	6.16	5.66	4.68	4.13	8.17	6.49	1.71	3.33	4.79	1.44	1	0	1	0	0.276233	0.049727	0.602278
Tb927.11.15030	16.02	17.01	14.71	5.45	1.84	1.15	62.29	56.59	52.13	32.85	39.68	19.36	46.61	50.56	46.52	33.87	33.09	30.04	83.4	100.29	92.28	64.84	103.94	60.24	0.34	0.34	0.32	0.16	0.06	0.04	0.75	0.56	0.56	0.51	0.38	0.32	5.66	1.87	4.65	2.49	0	0	1	0	0.460225	0.0151619	0.0711008
Tb927.10.13450	27.47	27.28	25.18	8.59	3.93	2.81	49.41	56.13	66.77	31.38	25.03	30.24	89.15	87.41	83.61	72.88	76.28	84.96	90.71	107.62	128.31	80.99	103.18	104.09	0.31	0.31	0.3	0.12	0.05	0.03	0.54	0.52	0.52	0.39	0.24	0.29	5.21	1.72	4.6	2.67	0	0	1	1	0.0422341	0.0191467	0.0451798
Tb927.11.10470	27.27	22.42	21.51	11.11	4.85	3.9	59.11	63.42	63.4	35.39	34.06	31.93	25.07	22.64	22.52	22.75	15.28	21.33	32.4	32.51	33.37	19.29	23.92	24.77	1.09	0.99	0.96	0.49	0.32	0.18	1.82	1.95	1.9	1.83	1.42	1.29	3.59	1.87	4.59	2.45	0	0	1	0	0.0413101	0.00760703	0.152328
Tb927.8.8300	59.31	48.49	60.44	14.78	3.01	2.69	96.15	90.82	117.19	34.43	28.18	19.59	26.31	20.7	26.05	17.7	10.63	9	22.2	20.21	33.59	12.8	14.09	12.48	2.25	2.34	2.32	0.84	0.28	0.3	4.33	4.49	3.49	2.69	2	1.57	8.21	1.78	4.41	2.48	0	0	1	1	0.407208	0.0396681	0.0210683
Tb927.11.5450	44.41	44.2	39.36	9.28	7.86	4.7	85.11	95.35	97.5	47.98	54.58	64.57	31.96	30.41	25.35	11.29	11.69	8.31	26.21	24.16	33.81	14.98	24.48	22.8	1.39	1.45	1.55	0.82	0.67	0.57	3.25	3.95	2.88	3.2	2.23	2.83	5.86	2.3	4.01	1.74	1	0	1	0	0.387995	0.0145945	0.238535
Tb927.11.8430	22.41	25.99	25.14	14.73	8.35	5.33	98.36	102.68	93.94	95.1	95.33	72.63	45.32	48.02	49.01	47.12	47.6	47.64	93.22	107.66	83.82	108.4	135.06	104.28	0.49	0.54	0.51	0.31	0.18	0.11	1.06	0.95	1.12	0.88	0.71	0.7	2.59	2.03	3.82	1.88	0	0	1	0	0.246128	0.00344776	0.0322659
Tb927.9.4310	20.54	21.82	22.04	7.67	6.11	4.7	110.28	115.64	120.01	72	72.52	71.97	65.57	59.53	59.17	44.46	33.04	24.88	126.08	131.65	124.49	90.13	133.64	99.85	0.31	0.37	0.37	0.17	0.18	0.19	0.87	0.88	0.96	0.8	0.54	0.72	3.48	2.58	3.81	1.48	1	0	1	0	0.0563369	0.0243567	0.103374
Tb927.11.9920	135.88	129.8	131.35	120.43	124.85	110.53	181.38	194.08	231.15	194.67	165.16	209.64	9.59	8.2	9.51	11.11	10.82	11.7	5.23	4.32	4.52	5.23	4.76	4.57	14.17	15.83	13.81	10.84	11.54	9.45	34.68	44.93	51.14	37.22	34.7	45.87	1.12	2.98	3.7	1.24	1	0	1	0	0.389166	0.0118791	0.518715
Tb927.7.3150	16.06	15.55	16.36	9.5	3.54	3.78	38.63	40.91	42.52	32.09	38.16	33.72	22.49	19.33	22.69	24.93	27.03	42.77	41.22	57.9	50.79	47.07	55.95	52.61	0.71	0.8	0.72	0.38	0.13	0.09	0.94	0.71	0.84	0.68	0.68	0.64	2.85	1.12	3.33	2.97	0	0	1	0	0.837606	0.0364692	0.140291
Tb927.11.15010	22.83	19.76	17.37	4.88	1.46	0.97	45.73	57.74	69.81	10.1	13.58	7.77	67.69	60.35	56.69	49.12	36.25	23.39	90.29	79.96	94.91	50.98	64.72	44.41	0.34	0.33	0.31	0.1	0.04	0.04	0.51	0.72	0.74	0.2	0.21	0.17	8.2	2.01	3.22	1.6	0	0	1	0	0.459049	0.0119615	0.0315301
Tb927.9.12690	21.08	23.54	20.34	12.64	7.33	3.04	36.58	46.05	31.88	36.96	43.33	31.6	23.24	25.56	21.16	20.88	17.23	12.04	28.84	27.74	23.95	25.84	35.73	22.8	0.91	0.92	0.96	0.61	0.43	0.25	1.27	1.66	1.33	1.43	1.21	1.39	2.82	1.53	3.12	2.04	0	0	1	0	0.489588	0.00325902	0.627925
Tb927.8.1580	37.77	41.41	39.06	26.63	14.31	13.53	149.53	148.48	123.53	137.91	116	101.5	57.98	64.82	59.3	53.66	50.27	45.58	78.17	88.64	78.37	101.4	123.55	97.21	0.65	0.64	0.66	0.5	0.28	0.3	1.91	1.68	1.58	1.36	0.94	1.04	2.17	2.65	3.09	1.17	1	0	1	0	0.27758	0.0181688	0.0308356
Tb927.6.3070	42.08	40.76	40.19	16	4.22	3.33	64.42	68.73	57.91	36.76	44.29	28.45	29.01	31.4	29.24	18.48	6.6	6.36	40.97	47.74	43.38	16.3	25.24	13.8	1.45	1.3	1.37	0.87	0.64	0.52	1.57	1.44	1.33	2.26	1.75	2.06	5.22	1.05	2.99	2.85	0	0	1	0	0.871187	0.0033224	0.0523397
Tb927.4.4810	17.02	17.87	15.1	8.11	4.85	2.58	35.83	42.47	34.44	17.92	25.95	13.38	17.97	18.56	19.42	11.99	9.07	7.22	19.1	22.18	23.76	11.83	14.39	9.99	0.95	0.96	0.78	0.68	0.53	0.36	1.88	1.91	1.45	1.51	1.8	1.34	3.22	1.95	2.96	1.52	0	0	1	0	0.368221	0.00497037	0.394391
Tb927.6.5090	72.21	65.63	64.19	15.74	8.49	7.45	89.54	101.32	130.39	34.93	31.27	37.63	23.95	21.78	24.7	15.43	10.63	12.44	20.27	19.79	32.03	12.85	16.57	16.01	3.02	3.01	2.6	1.02	0.8	0.6	4.42	5.12	4.07	2.72	1.89	2.35	6.38	1.58	2.88	1.82	0	0	1	0	0.36769	0.0329366	0.0162689
Tb927.5.1660	200.08	187.23	101.11	78.59	91.95	86.45	269.63	177.74	183.36	158.37	234.54	305.25	62.09	53.09	33.82	42.54	63.95	73.04	34.19	26.13	29.66	37.83	47.64	85.67	3.22	3.53	2.99	1.85	1.44	1.18	7.89	6.8	6.18	4.19	4.92	3.56	1.9	2.14	2.83	1.32	1	0	1	0	0.319272	0.0151446	0.0240837
Tb927.9.8370	33.58	35.01	32.77	26.46	24.75	21.84	47.11	57.9	39.45	43.11	78.55	48.42	46.11	48.97	45.17	47.99	49.54	48.62	37.92	39.3	35	38.74	45.96	36.88	0.73	0.71	0.73	0.55	0.5	0.45	1.24	1.47	1.13	1.11	1.71	1.31	1.39	1.77	2.75	1.55	0	0	1	0	0.423729	0.035708	0.673822
Tb927.8.870	30.38	19.93	8.51	13.47	11.55	8.08	122.61	96.67	102.54	41.94	67.15	50.44	78.02	47.89	22.65	35.44	35.66	40.59	131.85	83.13	77.67	47.83	91.57	64.76	0.39	0.42	0.38	0.38	0.32	0.2	0.93	1.16	1.32	0.88	0.73	0.78	1.78	2.87	2.66	0.93	1	0	1	0	0.375391	0.00250735	0.0908109
Tb927.9.4230	145.67	147.63	138.77	96.28	62.3	59.74	153.5	173.46	175.91	126.94	84.48	118.55	75.24	70.87	71.57	82.34	85.06	89.84	41.47	33.91	47.86	45.95	46.73	53.13	1.94	2.08	1.94	1.17	0.73	0.66	3.7	5.12	3.68	2.76	1.81	2.23	1.98	2.1	2.66	1.27	1	0	1	0	0.459432	0.0231837	0.0468555
Tb927.7.2980	144.39	240.41	158.76	97.33	106.36	41.22	164.29	176.34	120.9	118.05	180.41	94.62	127.62	226.02	155.66	112.37	159.1	74.07	72.28	80.08	72.55	56.72	91.93	64.2	1.13	1.06	1.02	0.87	0.67	0.56	2.27	2.2	1.67	2.08	1.96	1.47	2.22	1.91	2.62	1.37	0	0	1	0	0.422455	0.0134318	0.485557
Tb927.10.3230	57.11	50.25	46.56	47.21	34.94	29.87	95.27	106.55	87.94	94.34	90.26	86.43	28.47	25.04	25	30.51	27.85	24.02	22.53	22.96	20.91	23.71	28.28	26.71	2.01	2.01	1.86	1.55	1.25	1.24	4.23	4.64	4.21	3.98	3.19	3.24	1.37	2.22	2.58	1.16	1	0	1	0	0.142339	0.00853084	0.0628155
Tb927.4.2460	6.39	7.73	6.68	2.01	1.12	1.2	8.99	10.41	16.53	2.69	2.79	2.31	17.35	19.76	15.84	13.69	9.66	6.76	13.29	14.61	25.14	6.14	6.79	7.82	0.37	0.39	0.42	0.15	0.12	0.18	0.68	0.71	0.66	0.44	0.41	0.3	4.8	1.74	2.56	1.47	0	0	1	0	0.0500053	0.0357415	0.0223386
Tb927.6.1510	41.05	34.88	34.04	19.09	14.8	8.43	47.61	43.99	37.33	39	32.13	31.93	20.92	17.74	19.16	15.39	20.52	12.38	14.71	13.99	18.83	13.1	17.74	16.25	1.96	1.97	1.78	1.24	0.72	0.68	3.24	3.14	1.98	2.98	1.81	1.96	2.6	1.46	2.56	1.75	0	0	1	0	0.714429	0.0476894	0.394357
Tb927.10.14390	87.86	87.67	95.44	56.58	29.21	30.5	147.06	151.65	158.75	117.49	92.79	96.51	31.21	32	33.99	36.18	32.22	35.37	26.63	28.52	29.1	37.32	32.89	38.34	2.82	2.74	2.81	1.56	0.91	0.86	5.52	5.32	5.46	3.15	2.82	2.52	2.33	1.95	2.55	1.31	0	0	1	0	0.0425955	0.0246693	0.0128471
Tb927.7.3020	143.81	246.51	160.46	98.99	106.26	43.51	157.89	177.82	120.49	114.75	174.53	91.04	134.01	228.6	155.88	110.67	155.9	74.36	73.57	80.66	70.88	57.17	89.95	60.38	1.07	1.08	1.03	0.89	0.68	0.59	2.15	2.2	1.7	2.01	1.94	1.51	2.21	1.9	2.53	1.33	0	0	1	0	0.39453	0.0076678	0.439397
Tb927.7.1850	50.47	52.57	37.14	31.38	12.47	7.91	144.18	186.09	123.86	106.83	87.57	57.98	30.63	30.41	23.87	26.07	19.85	16.45	50.41	57.66	47.97	42.4	54.28	33.96	1.65	1.73	1.56	1.2	0.63	0.48	2.86	3.23	2.58	2.52	1.61	1.71	2.71	1.76	2.53	1.44	0	0	1	0	0.365885	0.0404659	0.071383
Tb927.7.1810	50.63	48.32	41.41	28.11	11.98	9.06	145.56	183.34	119.67	107.44	89.19	58.26	28.6	29.47	24.96	24.93	16.89	13.87	50.29	63.66	45.97	40.01	51.74	33.53	1.77	1.64	1.66	1.13	0.71	0.65	2.89	2.88	2.6	2.69	1.72	1.74	2.86	1.65	2.47	1.5	0	0	1	0	0.190096	0.0482116	0.149599
Tb927.11.8470	0.83	0.82	0.74	0.31	0.53	0.8	10.45	13.25	8.01	4.93	10.03	4.05	8.72	5.8	4.45	3.31	4.61	4.13	39.55	46.63	34.03	12.8	32.64	16.39	0.1	0.14	0.17	0.09	0.11	0.19	0.26	0.28	0.24	0.39	0.31	0.25	1.46	1.9	2.44	1.28	0	0	1	0	0.318761	0.0252854	0.308851
Tb927.11.2500	237.97	190.2	230.45	116.73	55.41	48.5	217.58	190.95	202.57	115.92	103.38	113.75	71.22	56.27	69.47	59.93	44.74	43	32.73	25.1	40.3	26.61	32.23	38.86	3.34	3.38	3.32	1.95	1.24	1.13	6.65	7.61	5.03	4.36	3.21	2.93	2.99	1.92	2.43	1.27	0	0	1	0	0.49282	0.0291646	0.0491159
Tb927.10.1500	227.93	239.63	213.65	116.64	100.39	78.48	233.85	209.3	295.7	154.91	112.71	183.03	82.05	84.23	76.98	88.18	94.52	91.73	41.47	32.06	52.5	52.1	47.94	73.57	2.78	2.84	2.78	1.32	1.06	0.86	5.64	6.53	5.63	2.97	2.35	2.49	2.31	2.12	2.41	1.14	1	0	1	0	0.286353	0.0289854	0.011531
Tb927.6.4000	144.18	152.05	160.5	73.23	49.06	35.6	153.75	150.13	153.19	87.18	73.74	76.11	154.64	151.11	161.11	152.43	146.97	150.09	94.81	79.55	93.98	95.1	94.87	101.74	0.93	1.01	1	0.48	0.33	0.24	1.62	1.89	1.63	0.92	0.78	0.75	2.89	1.75	2.33	1.33	0	0	1	0	0.301644	0.0401482	0.0125957
Tb927.11.3040	20.5	17.44	14.53	14.43	8.25	4.64	26.04	26.46	15.9	22.85	27.47	12.86	68.35	74.48	70.96	64.25	48.09	33.31	72.7	85.68	67.92	51.59	68.11	37.59	0.3	0.23	0.2	0.22	0.17	0.14	0.36	0.31	0.23	0.44	0.4	0.34	1.92	1.23	2.23	1.81	0	0	1	0	0.827083	0.00546928	0.138484
Tb927.8.6590	16.27	17.18	15.45	9.28	3.35	2.12	21.32	24.86	23.28	14.27	15.56	11.45	25.77	27.15	25.14	19.48	11.89	10.72	25.29	25.56	30.62	18.94	20.47	18.51	0.63	0.63	0.61	0.48	0.28	0.2	0.84	0.97	0.76	0.75	0.76	0.62	3.32	1.37	2.22	1.62	0	0	1	0	0.514363	0.0268214	0.143732
Tb927.3.5080	10.87	6.49	2.27	1.7	2.38	2.52	16.26	14.24	14.31	4.62	9.43	8.01	30.46	20.19	9.38	8.02	5.77	7.45	33.07	24.28	26.99	6.19	17.08	9.75	0.36	0.32	0.24	0.21	0.41	0.34	0.49	0.59	0.53	0.75	0.55	0.82	2.97	1.75	2.21	1.26	0	0	1	0	0.276874	0.0230036	0.172262
Tb927.11.14910	38.72	39.3	42.81	18.87	10.97	11.35	54.8	66.3	56.72	42.14	38.01	35.61	75.53	76.41	77.11	55.88	53.62	52.23	77.17	81.44	89.12	70.78	72.93	67.12	0.51	0.51	0.56	0.34	0.2	0.22	0.71	0.81	0.64	0.6	0.52	0.53	2.93	1.37	2.17	1.58	0	0	1	0	0.472203	0.00971507	0.0652961
Tb927.8.6090	23.37	20.96	20.42	6.49	6.94	4.36	45.06	45.23	42.19	18.48	42.42	26.75	81.88	71.43	69.47	53.09	59.73	53.14	138.37	152.1	138.51	81.24	174.64	119.16	0.29	0.29	0.29	0.12	0.12	0.08	0.33	0.3	0.3	0.23	0.24	0.22	3.64	1.07	2.16	2.02	0	0	1	1	0.745501	0.0154912	0.0157659
Tb927.10.2930	40.88	34.53	30.07	9.89	6.94	3.73	43.31	41.24	51.72	10.21	14.29	7.3	82.8	71.69	70.83	49.95	36.49	30.96	49.66	45.02	44.93	27.32	36.49	24.44	0.49	0.48	0.42	0.2	0.19	0.12	0.87	0.92	1.15	0.37	0.39	0.3	5.13	2.12	2.08	0.98	1	0	1	0	0.375733	0.0143985	0.0221875
Tb927.9.12610	143.93	193.07	142.26	98.86	74.29	51.31	194.8	225.6	193.11	168.12	131.15	138.38	47.69	63.05	45.65	52.3	57.3	45.06	40.09	37.24	40.93	54.84	46.27	47.66	3.02	3.06	3.12	1.89	1.3	1.14	4.86	6.06	4.72	3.07	2.83	2.9	2.14	1.7	2.03	1.19	0	0	1	0	0.449202	0.0208535	0.0398528
Tb927.9.12630	157.38	205.92	151.82	106.35	82.49	51.88	204.29	241.03	206.57	176.6	137.79	143.8	47.15	67.78	49.22	44.81	54.59	37.72	36.41	34.49	36.04	44.12	44.9	41.02	3.34	3.04	3.08	2.37	1.51	1.38	5.61	6.99	5.73	4	3.07	3.51	2.14	1.94	2.01	1.04	0	0	1	0	0.366047	0.0236972	0.0221617
Tb927.3.3930	8.47	5.03	2.23	0.83	0.53	0.75	20.69	26.3	20.28	12.95	15.71	13.61	15.11	9.28	4.63	2.83	2.96	4.36	20.69	17.61	17.94	3.86	13.13	7.91	0.56	0.54	0.48	0.29	0.18	0.17	1	1.49	1.13	3.35	1.2	1.72	7.45	2.29	9.8	4.28	1	0	0	0	0.459325	0.105342	0.318033
Tb927.11.2860	2.03	2.58	1.57	0.7	1.07	0.69	38.25	49.75	50.68	33.71	28.89	36.83	10.04	8.38	5.24	4.88	7.38	8.89	76.71	91.85	71.59	22.44	63.5	34.43	0.2	0.31	0.3	0.14	0.14	0.08	0.5	0.54	0.71	1.5	0.45	1.07	2.51	2.16	8.39	3.88	1	0	0	0	0.373078	0.104583	0.311377
Tb927.11.12120	2.32	1.93	0.96	0.26	0.1	0.17	12.08	11.93	9.94	4.47	4	3.25	5.81	3.26	2.4	2.48	1.84	1.83	24.45	18.81	19.17	4.01	11.61	5.98	0.4	0.59	0.4	0.1	0.05	0.09	0.49	0.63	0.52	1.11	0.34	0.54	9.83	1.18	8.29	7.03	0	0	0	0	0.845127	0.12832	0.674519
Tb927.10.3260	31.58	34.92	27.93	5.67	2.52	1.89	46.99	60.49	58.43	23.1	22.96	19.08	35.07	39.26	34.43	16.82	24.46	24.65	24.12	26.01	37.85	12.59	26.25	22.65	0.9	0.89	0.81	0.34	0.1	0.08	1.95	2.33	1.54	1.83	0.87	0.84	9.37	2.24	6.81	3.04	1	0	0	0	0.457037	0.0892676	0.148178
Tb927.9.12170	5.64	4.08	2.31	0.7	0.29	0.4	26.17	26.67	23.36	4.77	5.98	3.39	82.42	61.29	40.71	49.25	38.87	39.21	151.29	146.34	126.83	56.72	107.39	56.9	0.07	0.07	0.06	0.01	0.01	0.01	0.17	0.18	0.18	0.08	0.06	0.06	8.65	2.65	6.67	2.52	1	1	0	1	0.0341664	0.188918	0.0104535
Tb927.9.15610	7.14	7.04	6.68	4.4	1.75	1.83	24.54	27.08	19.02	17.57	19.76	11.21	1.08	1.16	1.35	0.7	0.39	0.52	1.05	1.15	0.74	0.36	0.91	0.71	6.61	6.07	4.95	6.29	4.49	3.52	23.37	23.55	25.7	48.81	21.71	15.79	2.61	4.12	6.04	1.47	1	1	0	0	0.0398477	0.142977	0.706439
Tb927.6.220	8.8	8.55	5.02	0.87	0.19	0.46	17.18	18.77	15.35	4.37	5.27	2.21	9.34	7.09	4.97	3.23	0.92	0.86	14	13.29	11.83	1.22	4.66	1.79	0.94	1.21	1.01	0.27	0.21	0.53	1.23	1.41	1.3	3.58	1.13	1.23	14.72	1.25	5.88	4.7	0	0	0	0	0.525191	0.178974	0.504645
Tb927.11.2400	9.88	7.09	6.63	3.18	1.75	0.69	26.38	30.45	19.2	7.46	20.93	7.96	22.62	21.52	20.77	17.04	19.07	19.09	26.88	21.52	23.58	18.33	29.49	20.96	0.44	0.33	0.32	0.19	0.09	0.04	0.98	1.41	0.81	0.41	0.71	0.38	4.2	2.94	4.69	1.6	1	0	0	0	0.486524	0.0564509	0.0760868
Tb927.11.780	12.41	13.06	13.62	4.49	2.62	2.01	105.34	118.89	132.43	57.48	40.44	46.06	92.59	77.14	79.29	73.92	56.33	48.33	240.62	243.42	319.05	185.33	233.12	206.39	0.13	0.17	0.17	0.06	0.05	0.04	0.44	0.49	0.42	0.31	0.17	0.22	4.29	2.87	4.67	1.63	1	0	0	0	0.107039	0.0669603	0.0281048
Tb927.1.4650	10.04	4.77	4.06	0.74	0.39	0.23	20.02	22.06	16.31	10.05	8.67	7.06	27.35	11.9	3.71	8.46	6.11	10.95	50.33	40.86	24.43	23.61	64.51	40.32	0.37	0.4	1.09	0.09	0.06	0.02	0.4	0.54	0.67	0.43	0.13	0.18	13.88	0.87	4.35	5	0	0	0	0	0.970768	0.195694	0.0873123
Tb927.3.1630	1.78	1.8	1.61	0.57	0.24	0.11	11.45	15.72	11.34	4.01	4.71	2.45	16.06	12.41	9.86	11.11	14.75	21.84	44.35	42.72	38.19	22.54	64.97	42.91	0.11	0.15	0.16	0.05	0.02	0.01	0.26	0.37	0.3	0.18	0.07	0.06	5.64	2.21	3.88	1.76	1	0	0	0	0.369021	0.286134	0.0251839
Tb927.6.820	3.53	2.88	2.14	1	1.36	1.15	46.78	60.87	72.74	24.58	29.95	23.22	4.65	3.65	2.75	3.05	5.29	8.08	30.06	33.58	32.51	19.65	48.8	30.29	0.76	0.79	0.78	0.33	0.26	0.14	1.56	1.81	2.24	1.25	0.61	0.77	2.44	2.41	3.6	1.49	1	0	0	0	0.42355	0.100926	0.0324674
Tb927.4.4230	4.11	3.69	3.75	1.05	0.19	0.11	22.03	27.12	32.85	3.15	5.07	2.78	35.36	28.22	23.52	23.28	20.52	12.96	61.83	60.41	67.62	30.97	66.89	37.21	0.12	0.13	0.16	0.05	0.01	0.01	0.36	0.45	0.49	0.1	0.08	0.07	8.56	3.17	3.57	1.13	1	0	0	0	0.31194	0.0548634	0.0193778
Tb927.3.4710	12.53	12.2	10.21	2.22	0.44	0.11	15.34	16.54	18.87	3.5	4.26	3.16	24.57	23.58	19.59	13.25	10.63	10.43	21.57	26.46	34.96	9.09	28.28	13.71	0.51	0.52	0.52	0.17	0.04	0.01	0.71	0.63	0.54	0.39	0.15	0.23	12.61	1.21	3.5	2.89	0	0	0	1	0.711021	0.173008	0.0257359
Tb927.11.13940	27.81	28.43	24.48	7.8	3.78	2.47	109.98	129.84	116.41	32.6	59.19	27.69	119.4	110	96.53	95.76	75.5	57.96	229.25	279.68	236.64	161.57	303.21	174.55	0.23	0.26	0.25	0.08	0.05	0.04	0.48	0.46	0.49	0.2	0.2	0.16	5.75	1.93	3.29	1.7	0	0	0	0	0.0521721	0.127207	0.00926171
Tb927.8.4700	35.61	39.65	38.62	15.52	6.16	5.79	59.36	85.43	65.03	32.09	25.14	18.56	21.75	20.62	20.68	11.51	7.42	7.51	19.06	22.39	34.14	7.26	9.02	7.72	1.64	1.92	1.87	1.35	0.83	0.77	3.11	3.82	1.9	4.42	2.79	2.4	4.15	1.63	3.26	2	0	0	0	0	0.739792	0.0600466	0.778139
Tb927.10.14930	4.23	4.51	3.01	0.44	0.1	0.23	16.97	15.56	14.64	1.27	2.69	1.51	43.2	37.58	23.13	17.43	13.39	15.65	80.3	71.77	72.81	22.75	56.3	30.8	0.1	0.12	0.13	0.03	0.01	0.01	0.21	0.22	0.2	0.06	0.05	0.05	15.26	1.8	3.2	1.78	0	0	0	0	0.147321	1.72841	0.0110767
Tb927.11.10940	9.34	7.39	4.49	1.26	0.29	0.17	17.89	17.78	14.98	2.84	4.05	2.64	30.01	20.49	10.74	10.59	9.07	11.81	46.86	34.32	37.96	11.37	30.2	21.67	0.31	0.36	0.42	0.12	0.03	0.01	0.38	0.52	0.39	0.25	0.13	0.12	12.34	1.18	3.13	2.65	0	0	0	1	0.827107	0.186565	0.022898
Tb927.5.3290	7.43	9.62	9.78	1.26	0.24	0.34	30.98	50.41	63.21	9.19	9.27	8.2	6.81	9.49	7.64	3.79	3.4	3.73	26.92	44.49	61.21	10.71	33.95	21.05	1.09	1.01	1.28	0.33	0.07	0.09	1.15	1.13	1.03	0.86	0.27	0.39	14.58	0.98	3.1	3.16	0	0	0	0	0.97392	0.21438	0.0852333
Tb927.11.16720	5.4	4.38	4.06	0.61	0.78	0.29	38.08	32.02	39.15	7.31	10.64	6.03	12.78	10.27	8.38	6.76	9.8	11.7	60.82	60.08	59.84	27.37	68.57	41.4	0.42	0.43	0.48	0.09	0.08	0.02	0.63	0.53	0.65	0.27	0.16	0.15	8.24	1.36	3.05	2.24	0	0	0	1	0.427424	0.417552	0.0115187
Tb927.8.6650	2.03	2.15	1.4	0.52	0.39	0.75	11.62	14.53	16.5	1.98	3.24	2.21	27.52	19.29	10.43	16.43	19.65	35.6	49.66	42.22	41.08	19.09	57.11	44.46	0.07	0.11	0.13	0.03	0.02	0.02	0.23	0.34	0.4	0.1	0.06	0.05	3.36	3.13	3	0.96	1	0	0	0	0.44393	0.116106	0.0375861
Tb927.8.3020	12.12	9.06	9.51	1.39	0.44	0.46	92.55	92.64	105.81	28.38	12.21	15.31	125.38	111.42	105.13	86.26	75.21	60.65	482.95	567.05	533.15	444.74	596.48	433.13	0.1	0.08	0.09	0.02	0.01	0.01	0.19	0.16	0.2	0.06	0.02	0.04	13.4	2.04	3	1.47	0	0	0	0	0.274664	1.42262	0.0103956
Tb927.11.13120	29.92	27.45	29.63	25.06	17.86	14.1	30.64	31.85	26.62	21.33	29.39	20.11	0.75	1.03	0.87	0.61	0.29	0.52	0.67	0.37	0.48	0.2	0.51	0.09	39.89	26.65	34.06	41.08	61.59	27.12	45.73	86.08	55.46	106.65	57.63	223.44	1.53	1.86	2.99	1.61	0	0	0	0	0.674511	0.228983	0.319325
Tb927.3.3960	15.73	10.05	5.15	3.53	3.4	3.73	56.94	67.98	46.23	47.32	68.72	56.9	25.65	15.76	10.47	5.71	3.25	3.33	79.47	60.82	46.97	14.22	40.19	18.56	0.61	0.64	0.49	0.62	1.05	1.12	0.72	1.12	0.98	3.33	1.71	3.07	2.9	1.62	2.91	1.8	0	0	0	0	0.558604	0.0703201	0.075879
Tb927.11.6120	13.41	13.36	10.6	2.75	1.7	1.61	35.83	41.56	57.65	15.28	7.55	9.28	6.97	8.81	6.59	4.05	2.13	2.12	9.32	10.49	18.94	4.27	5.52	6.45	1.92	1.52	1.61	0.68	0.8	0.76	3.84	3.96	3.04	3.58	1.37	1.44	6.17	2.15	2.85	1.33	1	0	0	0	0.317236	0.210857	0.179091
Tb927.6.5010	43.78	25.64	10.12	6.32	2.47	0.97	54.85	43.38	27.66	15.64	20.02	11.26	27.64	15.76	6.5	6.49	3.93	4.7	31.64	20.29	14.01	6.09	16.06	8.67	1.58	1.63	1.56	0.97	0.63	0.21	1.73	2.14	1.97	2.57	1.25	1.3	8.15	1.22	2.83	2.32	0	0	0	0	0.593577	0.109799	0.649341
Tb927.11.3760	13.86	11.86	10.3	1.92	0.44	0.4	23.83	27.78	23.47	4.32	7.35	2.97	43.7	39.9	39.06	21.58	13.59	10.95	66.13	79.22	85.05	23.56	48.25	25.62	0.32	0.3	0.26	0.09	0.03	0.04	0.36	0.35	0.28	0.18	0.15	0.12	13.05	1.13	2.81	2.49	0	0	0	1	0.828659	0.0529315	0.0165905
Tb927.1.1530	15.02	12.11	7.16	1.18	0.34	0.63	20.19	18.31	21.17	1.32	3.55	2.03	30.34	24.91	20.2	11.73	10.34	8.31	31.81	25.56	31.07	6.09	20.83	10.93	0.5	0.49	0.35	0.1	0.03	0.08	0.63	0.72	0.68	0.22	0.17	0.19	15.95	1.51	2.76	1.83	0	0	0	0	0.385331	0.275547	0.00995239
Tb927.8.970	54.04	47.38	40.41	14.73	7.23	5.27	129.51	124.16	101.36	34.02	48.6	22.51	27.1	28.61	29.06	22.8	21.45	19.26	34.78	36.59	33.33	24.93	38.72	27.46	1.99	1.66	1.39	0.65	0.34	0.27	3.72	3.39	3.04	1.36	1.26	0.82	5.21	2.01	2.73	1.36	0	0	0	0	0.19742	0.264362	0.0103653
Tb927.11.4430	53.21	52.1	50.23	15.65	5.87	5.96	35.32	34.03	49.97	18.23	10.19	13.19	61.01	57.9	59	32.65	24.12	24.71	26.5	23	33.85	15.79	15.2	17.62	0.87	0.9	0.85	0.48	0.24	0.24	1.33	1.48	1.48	1.15	0.67	0.75	5.66	1.64	2.68	1.63	0	0	0	0	0.235518	0.058209	0.0590565
Tb927.2.2720	9.71	7.82	6.98	2.18	0.82	0.75	14.38	13.91	18.83	6.5	4.31	4.29	11.58	9.62	5.11	4.53	3.93	4.41	12.75	9.22	13.09	5.64	8.51	7.77	0.84	0.81	1.37	0.48	0.21	0.17	1.13	1.51	1.44	1.15	0.51	0.55	6.54	1.35	2.57	1.9	0	0	0	0	0.751234	0.169895	0.0853456
Tb927.11.530	1.2	1.37	0.92	0.52	0.63	0.17	12.83	14.03	10.38	3.71	5.93	2.07	8.84	7.9	6.07	5.14	5.87	4.7	37.33	42.51	30.88	11.73	34.82	13.66	0.14	0.17	0.15	0.1	0.11	0.04	0.34	0.33	0.34	0.32	0.17	0.15	2.64	2.2	2.56	1.16	1	0	0	0	0.110251	0.132423	0.159888
Tb927.8.4340	6.43	6.06	5.28	2.75	0.63	0.23	14.13	15.8	15.79	5.84	9.07	4.14	25.73	23.54	21.73	12.6	9.8	11.41	40.93	47.33	47.75	20.06	31.88	22.23	0.25	0.26	0.24	0.22	0.06	0.02	0.35	0.33	0.33	0.29	0.28	0.19	4.92	1.35	2.53	1.87	0	0	0	0	0.106404	0.123418	0.125845
Tb927.3.5310	44.86	33.16	35.09	3.57	1.8	1.61	31.73	20.78	47.08	3.5	4.31	2.73	5.77	6.14	6.02	2.35	2.47	3.15	2.8	1.69	4.08	0.81	3.34	2.03	7.77	5.4	5.83	1.52	0.73	0.51	11.33	12.3	11.54	4.32	1.29	1.34	16.2	1.85	2.52	1.36	0	0	0	0	0.30046	0.740496	0.0179892
Tb927.5.3440	18.43	19.59	22.39	8.76	4.66	5.39	55.64	91.03	73.66	48.79	47.28	44.93	10	12.24	13.83	9.5	6.94	8.94	17.89	27.08	25.28	19.9	33.14	28.26	1.84	1.6	1.62	0.92	0.67	0.6	3.11	3.36	2.91	2.45	1.43	1.59	3.21	1.85	2.5	1.35	0	0	0	0	0.143684	0.0798619	0.049118
Tb927.6.2450	24.07	22.59	22.65	6.58	1.21	0.63	21.28	22.18	28.58	6.45	5.83	5.93	29.01	26.76	29.24	15.43	12.76	6.13	25.25	23.17	33.4	10.71	17.13	10.03	0.83	0.84	0.77	0.43	0.09	0.1	0.84	0.96	0.86	0.6	0.34	0.59	8.23	1.09	2.47	2.27	0	0	0	1	0.741402	0.132504	0.0417541
Tb927.4.4490	51.17	52.57	53.46	10.9	5.48	6.76	41.47	48.68	79.45	17.87	11.3	12.2	35.48	36.77	34.13	20.05	22.81	15.36	17.18	16.87	30.51	12.34	15.41	15.07	1.44	1.43	1.57	0.54	0.24	0.44	2.41	2.89	2.6	1.45	0.73	0.81	6.79	1.78	2.45	1.38	0	0	0	0	0.288454	0.286583	0.0171945
Tb927.11.15950	51.67	43.12	47.44	5.36	1.36	0.52	50.87	51.44	65.55	9.14	7.45	6.78	163.02	123.66	141.08	46.12	42.07	35.03	164.95	121.03	221.36	45.19	94.26	63.82	0.32	0.35	0.34	0.12	0.03	0.01	0.31	0.43	0.3	0.2	0.08	0.11	19.65	1.03	2.44	2.37	0	0	0	1	0.977837	0.300912	0.0273861
Tb927.1.3550	2.91	2.79	1.75	1.09	0.49	0.63	17.98	20.33	16.35	11.83	8.46	6.12	34.57	26.2	22.43	12.07	9.41	8.37	62.12	64.49	59.95	46.51	75.16	36.08	0.08	0.11	0.08	0.09	0.05	0.08	0.29	0.32	0.27	0.25	0.11	0.17	3.37	3.26	2.41	0.74	1	0	0	0	0.105123	0.130061	0.100085
Tb927.8.4720	45.82	49.52	50.1	18.74	5.87	6.08	70.73	100.37	80.6	38.79	33.35	23.17	40.38	41.66	45.86	36.61	33.67	33.65	45.23	54.61	57.76	47.83	43.28	47.38	1.13	1.19	1.09	0.51	0.17	0.18	1.56	1.84	1.4	0.81	0.77	0.49	4.74	1.41	2.41	1.71	0	0	0	0	0.521116	0.15443	0.0165939
Tb927.8.3850	12.53	10.05	10.65	2.14	0.63	0.69	16.97	19.14	22.8	2.64	5.93	4.57	22.91	18.64	20.12	6.84	5.34	6.88	25.08	27.28	39	5.59	14.54	11.73	0.55	0.54	0.53	0.31	0.12	0.1	0.68	0.7	0.58	0.47	0.41	0.39	9.6	1.21	2.4	1.98	0	0	0	0	0.591971	0.107929	0.0200083
Tb927.1.3450	37.77	36.12	37.53	11.94	3.78	2.98	22.2	21.07	31.33	8.89	5.68	6.92	19.8	19.29	20.47	14.82	13.1	12.5	8.53	7.45	13.83	5.59	6.49	9.18	1.91	1.87	1.83	0.81	0.29	0.24	2.6	2.83	2.27	1.59	0.88	0.75	5.96	1.37	2.4	1.75	0	0	0	0	0.472429	0.227801	0.0227699
Tb927.8.4740	43.25	38.83	42.94	16.69	6.21	6.13	62.04	93.46	71.33	39.96	34.41	22.28	38.39	43.3	42.68	35.44	32.99	32.33	48.87	53.17	57.35	48.08	45.76	49.55	1.13	0.9	1.01	0.47	0.19	0.19	1.27	1.76	1.24	0.83	0.75	0.45	4.31	1.4	2.39	1.71	0	0	0	0	0.664996	0.0812998	0.0363934
Tb927.3.3550	62.25	58.85	56.95	33.08	15.67	19.95	76.21	80.62	105.88	75.2	41.1	69	41.79	42.14	38.84	43.15	48.38	60.43	43.64	46.38	58.84	52.35	47.99	65.37	1.49	1.4	1.47	0.77	0.32	0.33	1.75	1.74	1.8	1.44	0.86	1.06	2.59	1.21	2.37	1.96	0	0	0	0	0.137188	0.0544482	0.0719647
Tb927.10.8050	5.73	6.06	7.59	0.78	0.49	0.52	26.96	33.7	34.26	12.95	16.47	12.72	15.6	17.74	18.07	3.05	1.6	1.49	34.7	40.91	51.09	13.91	27.62	19.73	0.37	0.34	0.42	0.26	0.31	0.35	0.78	0.82	0.67	0.93	0.6	0.64	10.83	2.01	2.36	1.17	0	0	0	0	0.235807	0.0501008	0.795857
Tb927.10.2650	85.2	76.07	79.77	33.95	15.48	16.51	92.3	95.39	114.15	60.12	37.81	54.82	37.19	36.98	35.7	26.89	19.26	22.87	39.42	42.35	39.15	24.27	28.89	21.43	2.29	2.06	2.23	1.26	0.8	0.72	2.34	2.25	2.92	2.48	1.31	2.56	3.66	1.14	2.28	2	0	0	0	0	0.820963	0.0845683	0.470194
Tb927.8.4730	34.53	39.04	40.71	15.82	6.65	6.99	60.11	88.27	67.96	36.61	35.93	23.22	34.49	33.2	34.61	30.6	29.5	27.35	40.38	47.04	48.75	43.36	41	42.72	1	1.18	1.18	0.52	0.23	0.26	1.49	1.88	1.39	0.84	0.88	0.54	3.88	1.42	2.24	1.58	0	0	0	0	0.549774	0.0756058	0.0231129
Tb927.9.15530	19.92	18.04	17.8	10.64	3.93	3.9	39.55	38.89	28.51	17.52	19.46	10.17	1.78	2.75	2.4	2.09	1.41	1.43	2.09	2.63	2.22	1.73	2.18	2.17	11.19	6.56	7.42	5.09	2.79	2.73	18.92	14.79	12.84	10.13	8.93	4.69	3.02	1.85	2.24	1.21	0	0	0	0	0.453703	0.127995	0.0457165
Tb927.11.3300	21.54	20.83	22.39	3.84	2.09	0.86	28.72	40.62	55.87	10.71	10.9	9.33	26.98	24.01	24.48	8.63	9.41	10.09	32.98	36.91	55.2	12.14	27.67	22.94	0.8	0.87	0.91	0.44	0.22	0.09	0.87	1.1	1.01	0.88	0.39	0.41	9.54	1.16	2.24	1.93	0	0	0	0	0.737266	0.211871	0.109113
Tb927.11.12420	27.76	27.32	20.25	6.15	4.56	1.03	64.84	61.77	86.49	17.21	25.49	17.62	87.2	75.04	66.07	51.78	50.51	37.89	143.72	139.26	187.48	93.78	133.03	108.42	0.32	0.36	0.31	0.12	0.09	0.03	0.45	0.44	0.46	0.18	0.19	0.16	6.42	1.36	2.21	1.63	0	0	0	0	0.283466	18.96	0.0152891
Tb927.5.790	50.38	41.45	34.39	7.58	3.88	1.78	43.93	33.29	45.49	5.53	13.73	7.91	55.45	48.06	50.8	22.06	17.95	14.91	37.87	32.14	52.01	10.16	27.37	18.6	0.91	0.86	0.68	0.34	0.22	0.12	1.16	1.04	0.87	0.54	0.5	0.43	9.53	1.25	2.16	1.73	0	0	0	0	0.681639	0.0589333	0.0245184
Tb927.11.2730	42.33	40.59	40.89	22.32	10.92	12.15	73.03	74.98	77.85	66.06	36.18	53.79	34.78	34.96	34.43	31.82	26.1	27.4	38.58	38.07	40.22	46	42.47	50.96	1.22	1.16	1.19	0.7	0.42	0.44	1.89	1.97	1.94	1.44	0.85	1.06	2.73	1.62	2.15	1.33	0	0	0	0	0.0349735	0.0678859	0.0495455
Tb927.9.13430	3.11	2.49	2.36	0.39	0.58	0.34	29.47	35.47	36.85	14.32	16.32	11.68	5.15	5.28	3.36	2.75	2.13	3.21	72.78	65.43	55.35	25.54	69.28	36.41	0.6	0.47	0.7	0.14	0.27	0.11	0.4	0.54	0.67	0.56	0.24	0.32	6.08	0.91	2.15	2.36	0	0	0	0	0.93884	0.170202	0.273856
Tb927.5.2120	18.93	23.11	23.52	3.92	0.97	0.86	26	39.92	54.02	9.14	7.2	9.14	91.93	95.7	102.51	31.21	22.37	15.54	96.4	134.49	192.08	39.15	71.86	58.26	0.21	0.24	0.23	0.13	0.04	0.06	0.27	0.3	0.28	0.23	0.1	0.16	11.4	1.25	2.13	1.7	0	0	0	0	0.306731	0.161244	0.0891153
Tb927.10.3600	13.32	9.41	8.64	2.18	0.39	0.17	26.63	25.56	26.92	7.82	5.83	3.44	8.67	6.57	5.76	2.75	1.46	0.86	14.17	14.2	15.13	6.5	10.29	3.72	1.54	1.43	1.5	0.79	0.27	0.2	1.88	1.8	1.78	1.2	0.57	0.92	11.45	1.22	2.13	1.75	0	0	0	0	0.145507	0.181871	0.0434853
Tb927.7.3690	12.82	9.11	5.24	3.62	2.62	3.15	18.56	16.75	12.75	3	16.01	5.04	55.9	35.18	27.58	62.46	53.03	72.12	65.13	66.05	51.2	80.17	81.08	67.16	0.23	0.26	0.19	0.06	0.05	0.04	0.28	0.25	0.25	0.04	0.2	0.08	2.89	1.15	2.13	1.85	0	0	0	0	0.797537	0.407131	0.0907386
Tb927.10.15390	16.02	13.27	13.31	4.71	1.12	0.57	24.25	27.41	37.18	10.61	5.57	5.79	47.56	45.74	39.49	39.14	35.62	26.94	74.07	68.68	93.42	59.56	70.14	56.19	0.34	0.29	0.34	0.12	0.03	0.02	0.33	0.4	0.4	0.18	0.08	0.1	6.66	1.16	2.12	1.83	0	0	0	0	0.697937	0.946069	0.0139515
Tb927.4.1390	63.95	63.31	59.61	24.76	9.7	10.55	127.71	154.28	168.39	68.44	39.28	48.14	32	29.38	29.67	25.72	21.16	24.25	39.55	42.92	49.46	39.2	38.62	41.35	2	2.15	2.01	0.96	0.46	0.44	3.23	3.59	3.4	1.75	1.02	1.16	4.15	1.66	2.11	1.27	0	0	0	0	0.149488	0.261611	0.0150063
Tb927.11.15320	19.63	20.7	20.6	9.07	4.37	3.1	55.39	70.62	64.14	35.59	34.06	29.11	10.25	9.88	11.08	8.19	8.01	6.99	19.73	25.76	23.84	20.41	24.38	22.84	1.92	2.1	1.86	1.11	0.55	0.44	2.81	2.74	2.69	1.74	1.4	1.27	3.68	1.4	2.1	1.5	0	0	0	0	0.185556	0.097224	0.019083
Tb927.5.3770	16.1	19.97	20.82	7.63	3.93	6.48	51.96	84.57	66.32	42.55	35.17	36.17	4.19	4.38	5.41	3.14	3.2	3.38	5.52	9.01	10.23	7.36	11.76	12.29	3.84	4.56	3.85	2.43	1.23	1.92	9.41	9.39	6.48	5.78	2.99	2.94	3.15	2.06	2.1	1.02	0	0	0	0	0.458381	0.200757	0.0384216
Tb927.10.11080	29.51	18.73	13.88	8.15	10.09	5.33	31.02	20.21	35.26	7.41	26.86	14.88	58.73	37.07	35	15.39	11.98	15.65	50.75	30.58	65.1	16.4	12.77	14.46	0.5	0.51	0.4	0.53	0.84	0.34	0.61	0.66	0.54	0.45	2.1	1.03	2.64	1.28	2.09	1.63	0	0	0	0	0.489943	0.338035	0.359678
Tb927.7.4110	10.79	10.35	9.29	2.14	0.92	0.4	18.06	20.78	31.36	3.2	2.13	2.68	16.02	15.16	13.53	9.81	8.15	4.64	18.81	21.28	35.48	7.97	13.89	8.29	0.67	0.68	0.69	0.22	0.11	0.09	0.96	0.98	0.88	0.4	0.15	0.32	8.79	1.38	2.07	1.5	0	0	0	0	0.317951	0.473825	0.0164581
Tb927.2.3720	6.18	4.04	3.19	0.31	0.19	0.23	28.93	19.51	20.8	0.91	2.99	1.27	21.37	16.97	9.64	4.62	4.03	5.79	51.84	43.79	47.49	6.6	29.65	13.71	0.29	0.24	0.33	0.07	0.05	0.04	0.56	0.45	0.44	0.14	0.1	0.09	18.37	1.69	2.06	1.22	0	0	0	0	0.365123	0.143697	0.0155955
Tb927.10.14480	27.02	24.53	23.65	14.65	5.63	5.5	60.91	65.6	84.49	52.45	27.32	41.64	16.19	16.24	13.83	14.82	13.39	11.06	26.92	30.25	38.33	29.35	31.83	33.53	1.67	1.51	1.71	0.99	0.42	0.5	2.26	2.17	2.2	1.79	0.86	1.24	2.92	1.36	2.04	1.5	0	0	0	0	0.232303	0.138431	0.0864713
Tb927.4.3160	46.52	39.22	41.19	8.8	2.77	1.55	45.48	38.44	67.25	10.66	7.55	7.39	21.21	19.46	19.2	8.5	5.92	3.33	15.34	14.73	25.54	5.69	7.7	6.22	2.19	2.02	2.15	1.04	0.47	0.47	2.96	2.61	2.63	1.87	0.98	1.19	9.67	1.29	2.04	1.58	0	0	0	0	0.368838	0.161091	0.0320519
Tb927.7.670	33.16	24.48	24	7.15	2.04	1.43	40.38	43.25	46.08	21.83	17.59	15.87	34.36	24.65	22.04	15.74	14.31	11.12	63.83	66.59	57.72	27.16	82.2	35.42	0.97	0.99	1.09	0.45	0.14	0.13	0.63	0.65	0.8	0.8	0.21	0.45	7.69	0.68	2.03	2.99	0	0	0	0	0.308475	0.310616	0.364777
Tb927.1.1470	4.98	3.05	1.35	1.31	1.55	0.52	10.49	14.32	10.16	3.55	5.78	2.78	4.61	2.88	1.4	3.84	5.68	10.95	7.9	7.45	6.38	4.82	15.3	12.76	1.08	1.06	0.96	0.34	0.27	0.05	1.33	1.92	1.59	0.74	0.38	0.22	2.78	1.56	2.03	1.3	0	0	0	0	0.539373	0.706896	0.0180588
Tb927.10.14900	9.84	8.16	6.81	1.92	0.87	0.52	18.14	26.3	27.8	13.51	8.01	9	12.78	13.49	12.26	3.84	2.04	1.43	17.1	17.94	26.14	9.14	16.62	14.08	0.77	0.6	0.56	0.5	0.43	0.36	1.06	1.47	1.06	1.48	0.48	0.64	7.5	1.86	2.02	1.09	0	0	0	0	0.454607	0.302189	0.419774
Tb927.8.5050	24.98	19.72	18.07	4.62	1.26	0.86	30.47	30.33	43.15	6.14	3.45	4.76	21.91	17.4	15.93	13.86	6.55	7.34	22.57	23.83	34.4	11.07	9.88	12.34	1.14	1.13	1.13	0.33	0.19	0.12	1.35	1.27	1.25	0.55	0.35	0.39	9.31	1.14	2.02	1.77	0	0	0	0	0.435458	0.603109	0.01069
Tb927.9.2240	38.6	43.04	36.83	16.82	11.89	10.95	64.67	67.98	77.97	42.09	25.14	33.44	42.79	45.92	40.45	39.62	37.22	41.56	52.71	53.66	57.13	46.66	54.88	51.76	0.9	0.94	0.91	0.42	0.32	0.26	1.23	1.27	1.36	0.9	0.46	0.65	2.99	1.4	2.01	1.44	0	0	0	0	0.264363	0.137281	0.0410852
Tb927.7.6780	19.17	17.01	16.84	4.01	0.58	0.8	15.34	17.9	26.51	2.49	2.18	2.73	79.68	69.2	65.76	31.99	18.44	14.39	66.26	67.45	97.73	14.88	22.6	16.53	0.24	0.25	0.26	0.13	0.03	0.06	0.23	0.27	0.27	0.17	0.1	0.17	9.84	1.03	2	1.94	0	0	0	0	0.950594	0.179757	0.0331897
Tb927.5.1570	14.57	18.81	13.09	3.14	1.7	1.95	17.01	28.07	26.95	3.3	7.15	4.99	97.74	134.96	96.79	59.76	70.7	55.38	93.1	132.55	150.3	51.69	86.41	65.28	0.15	0.14	0.14	0.05	0.02	0.04	0.18	0.21	0.18	0.06	0.08	0.08	6.84	1.33	2	1.5	0	0	0	0	0.421721	0.291041	0.0107285
Tb927.8.1290	3.44	3.57	3.32	0.35	0.1	0.29	16.72	25.23	38.67	2.69	1.32	1.88	13.03	13.06	11.04	6.23	4.27	4.01	42.89	55.72	73.52	15.74	37.4	20.16	0.26	0.27	0.3	0.06	0.02	0.07	0.39	0.45	0.53	0.17	0.04	0.09	13.96	1.65	2	1.21	0	0	0	0	0.45392	1.42637	0.0136852
Tb927.5.3780	37.35	48.15	42.55	18.52	10.92	8.94	78.76	119.59	103.84	37.17	54.33	39.89	45.57	60.61	55.73	42.37	33.43	35.43	78.84	126.13	123.97	48.74	88.79	60.19	0.82	0.79	0.76	0.44	0.33	0.25	1	0.95	0.84	0.76	0.61	0.66	3.34	1.18	1.99	1.69	0	0	0	0	0.577251	0.0153494	0.0269907
Tb927.9.12570	160.66	211.37	153.91	109.8	89.91	59.51	202.12	246.96	212.99	194.72	151.17	155.48	102.3	136.81	96.96	117.51	161.43	126.98	95.35	82.92	73.03	146.18	122.54	116.34	1.57	1.54	1.59	0.93	0.56	0.47	2.12	2.98	2.92	1.33	1.23	1.34	2.03	1.71	1.99	1.16	0	0	0	0	0.501469	0.0476847	0.0464041
Tb927.10.11590	54.62	49.87	50.58	33.48	23.44	17.31	74.41	70.45	62.58	38.18	46.17	38.72	8.22	9.58	7.68	7.58	8.88	6.76	5.35	5.35	5.49	5.03	7.65	7.16	6.64	5.21	6.59	4.42	2.64	2.56	13.91	13.17	11.4	7.59	6.04	5.41	2.09	2.09	1.98	0.95	0	0	0	0	0.197858	0.111385	0.0136665
Tb927.3.5210	11.04	14	12.92	3.27	1.8	0.92	26.71	35.97	33.74	6.85	15.1	6.17	15.6	19.2	18.63	7.37	7.42	3.33	22.28	32.92	32.51	9.19	22.86	12.81	0.71	0.73	0.69	0.44	0.24	0.28	1.2	1.09	1.04	0.75	0.66	0.48	6.34	1.56	1.97	1.26	0	0	0	0	0.309688	0.0749905	0.0212508
Tb927.8.4540	37.31	28.22	19.64	5.27	2.81	1.78	89.12	97.12	110.37	26.15	29.49	20.54	22.49	16.45	12.35	7.63	5.82	4.3	45.44	44.69	57.54	18.48	38.92	22.14	1.66	1.72	1.59	0.69	0.48	0.41	1.96	2.17	1.92	1.42	0.76	0.93	8.64	1.22	1.97	1.61	0	0	0	0	0.39791	0.147705	0.0356534
Tb927.10.6000	18.34	16.24	16.32	6.41	2.04	1.89	21.24	22.88	34.03	8.73	7.7	7.39	12.66	12.71	12.39	11.73	10.14	8.83	12.37	12.76	20.98	10.97	14.04	13.71	1.45	1.28	1.32	0.55	0.2	0.21	1.72	1.79	1.62	0.8	0.55	0.54	4.92	1.27	1.97	1.55	0	0	0	0	0.278422	0.91758	0.0106493
Tb927.11.6700	38.18	46.73	46.56	46.51	52.26	42.54	64.04	83.33	57.02	86.88	131.76	96.08	53.79	56.18	55.07	74.05	85.01	70.8	59.86	67.29	49.34	86.57	99.84	74.98	0.71	0.83	0.85	0.63	0.61	0.6	1.07	1.24	1.16	1	1.32	1.28	0.93	1.45	1.96	1.35	0	0	0	0	0.248656	0.0277405	0.733762
Tb927.10.10150	118.99	75.9	84.75	125.44	66.23	69.77	343.33	216.09	168.87	429.96	194.76	146.67	10.25	8.81	9.12	13.34	14.51	18.46	24.41	15.39	23.54	27.42	17.84	17.8	11.61	8.62	9.29	9.4	4.56	3.78	14.07	14.04	7.17	15.68	10.92	8.24	1.07	1.2	1.96	1.63	0	0	0	0	0.902319	0.114493	0.966934
Tb927.3.5250	2.41	2.1	1.75	0.52	0.39	0.29	22.87	33.95	30.18	5.79	11.96	7.39	2.45	3.09	2.18	1.09	0.78	2.06	17.72	24.53	24.21	6.19	19	11.96	0.98	0.68	0.8	0.48	0.5	0.14	1.29	1.38	1.25	0.94	0.63	0.62	5.22	1.59	1.96	1.23	0	0	0	0	0.365581	0.125535	0.0309617
Tb927.10.1120	23.41	21.09	21.03	10.64	5.29	2.58	33.82	34.45	43.04	17.57	17.08	17	14.4	10.91	12.13	7.76	4.61	2.98	18.6	17.57	21.02	8.23	8.97	6.59	1.63	1.93	1.73	1.37	1.15	0.87	1.82	1.96	2.05	2.13	1.9	2.58	3.54	1.1	1.95	1.77	0	0	0	0	0.743896	0.0154852	0.336241
Tb927.10.5930	81.34	86.55	82.78	42.54	28.77	25.97	94.06	92.47	95.72	62.86	40.09	38.53	30.5	30.45	34.95	23.76	19.99	21.73	19.94	19.67	21.54	15.08	18.19	16.86	2.67	2.84	2.37	1.79	1.44	1.2	4.72	4.7	4.44	4.17	2.2	2.29	2.58	1.76	1.95	1.11	0	0	0	0	0.108826	0.167546	0.12296
Tb927.9.12550	146.3	201.32	142.48	106	86.85	58.42	201.32	234.94	199.64	186.45	154.97	149.49	61.46	77.7	57.43	66.17	77.83	55.27	53.47	48.89	49.16	77.13	61.98	61.42	2.38	2.59	2.48	1.6	1.12	1.06	3.77	4.81	4.06	2.42	2.5	2.43	1.95	1.7	1.94	1.14	0	0	0	0	0.397583	0.0243686	0.0384978
Tb927.7.4580	12.2	10.74	13	8.76	7.62	5.39	13.17	15.06	17.91	13.96	14.14	14.51	18.18	17.83	16.36	15.26	13.05	13.07	12.16	12.55	16.42	13.76	16.67	12.81	0.67	0.6	0.79	0.57	0.58	0.41	1.08	1.2	1.09	1.01	0.85	1.13	1.65	1.64	1.92	1.17	0	0	0	0	0.225427	0.0119609	0.271163
Tb927.10.3620	64.04	59.32	57.04	47.16	29.16	15.71	102.08	107.37	88.12	86.06	95.33	54.82	17.93	17.05	16.1	13.64	11.26	7.74	17.77	18.4	18.94	14.06	17.99	13.66	3.57	3.48	3.54	3.46	2.59	2.03	5.74	5.84	4.65	6.12	5.3	4.01	1.96	1.53	1.91	1.25	0	0	0	0	0.454908	0.0365378	0.742281
Tb927.2.4710	246.07	193.89	141.08	75.41	45.71	33.54	213.53	197.29	234.53	97.23	100.65	124.06	185.47	134.31	98.62	72.36	49.15	39.61	129	88.85	109.96	45.19	76.22	64.81	1.33	1.44	1.43	1.04	0.93	0.85	1.66	2.22	2.13	2.15	1.32	1.91	3.76	1.43	1.91	1.34	0	0	0	0	0.537324	0.0694528	0.540235
Tb927.4.4900	8.8	8.33	7.46	1.39	0.49	0.52	16.05	18.68	23.73	3.1	2.28	1.98	2.66	2.49	1.57	0.74	0.44	0.4	3.55	4.86	5.56	0.56	2.18	1.22	3.31	3.35	4.75	1.88	1.11	1.3	4.52	3.84	4.27	5.54	1.05	1.62	10.25	1.11	1.91	1.72	0	0	0	0	0.900906	0.46646	0.41831
Tb927.8.5240	77.65	76.97	76.11	44.07	32.99	32.56	84.07	76.26	108.51	80.07	46.78	69.47	30.92	34.83	31.81	27.37	38.04	32.68	23.41	22.72	28.95	29.5	29.09	30.24	2.51	2.21	2.39	1.61	0.87	1	3.59	3.36	3.75	2.71	1.61	2.3	2.1	1.5	1.9	1.27	0	0	0	0	0.143693	0.0785319	0.0491701
Tb927.6.4150	27.81	26.33	26.27	14.08	6.99	3.9	25.08	26.26	21.24	14.37	12.82	12.91	73.71	66.92	52.28	39.01	25.77	16.17	72.19	58.68	56.09	20.97	41.2	20.11	0.38	0.39	0.5	0.36	0.27	0.24	0.35	0.45	0.38	0.69	0.31	0.64	3.22	0.93	1.89	2.03	0	0	0	0	0.927745	0.162019	0.339874
Tb927.1.2600	12.95	10.31	6.63	1.44	1.02	0.57	18.39	16.63	23.73	4.21	6.08	3.86	18.63	12.89	8.16	3.57	3.54	5.33	13.92	12.96	17.13	6.65	13.28	9.28	0.7	0.8	0.81	0.4	0.29	0.11	1.32	1.28	1.39	0.63	0.46	0.42	9.86	1.73	1.89	1.09	0	0	0	0	0.0800339	0.700036	0.0115186
Tb927.9.2560	27.76	24.44	26.23	8.24	2.72	1.26	34.78	30.95	34.7	6.6	8.97	5.13	53	44.11	46.82	30.42	23.39	16.11	40.63	38.23	44.08	19.85	30	20.02	0.52	0.55	0.56	0.27	0.12	0.08	0.86	0.81	0.79	0.33	0.3	0.26	6.42	1.51	1.89	1.25	0	0	0	0	0.126457	31.9626	0.0143987
Tb927.8.7840	18.01	15.21	13.4	4.1	1.36	1.2	32.27	36.09	40.04	10.16	9.12	8.9	16.14	12.46	10.95	5.14	3.49	3.38	14.84	16.5	22.84	7.57	12.67	10.5	1.12	1.22	1.22	0.8	0.39	0.36	2.17	2.19	1.75	1.34	0.72	0.85	7	1.72	1.88	1.09	0	0	0	0	0.376112	0.236194	0.0225588
Tb927.8.3550	18.18	11.86	8.64	4.58	2.09	2.01	40.63	41.93	42.04	12.29	18.8	13.09	14.9	10.27	8.77	4.66	2.13	2.87	23.74	25.51	27.73	5.79	13.63	8.9	1.22	1.15	0.99	0.98	0.98	0.7	1.71	1.64	1.52	2.12	1.38	1.47	4.46	1.45	1.87	1.29	0	0	0	0	0.239111	0.0653445	0.904125
Tb927.5.760	40.84	44.33	45.17	9.98	8.25	6.31	76.25	114.86	158.38	32.09	43.43	49.12	103.01	105.36	101.46	74.88	83.02	80.03	176.95	289.31	314.01	127.7	353.73	235.87	0.4	0.42	0.45	0.13	0.1	0.08	0.43	0.4	0.5	0.25	0.12	0.21	5.31	1.05	1.87	1.78	0	0	0	0	0.931188	0.306136	0.0185662
Tb927.10.14780	70.84	72.38	70.43	34.04	20.48	16.8	117.93	142.1	131.87	46.26	69.68	43	127.62	127.96	127.69	118.03	121.94	119.82	121.56	143.29	143.73	122.47	157.61	143.14	0.56	0.57	0.55	0.29	0.17	0.14	0.97	0.99	0.92	0.38	0.44	0.3	3	1.71	1.87	1.09	0	0	0	0	0.139659	0.48191	0.0104032
Tb927.7.3090	66.65	64.47	59.83	20.75	5.97	4.53	70.98	75.43	112.74	37.17	21.23	29.15	69.56	71.99	68.21	52.09	35.13	24.37	94.89	92.8	137.76	61.44	65.43	59.16	0.96	0.9	0.88	0.4	0.17	0.19	0.75	0.81	0.82	0.6	0.32	0.49	6.11	0.87	1.86	2.14	0	0	0	0	0.377624	0.144329	0.0596823
Tb927.8.670	16.1	18.43	15.49	8.89	5.92	3.78	38.71	45.31	38.19	30.87	22.04	21.01	14.53	15.98	14.31	10.33	6.4	4.99	21.53	22.1	19.95	17.52	14.95	14.08	1.11	1.15	1.08	0.86	0.93	0.76	1.8	2.05	1.91	1.76	1.47	1.49	2.69	1.72	1.85	1.08	0	0	0	0	0.235606	0.007487	0.0558949
Tb927.6.4710	72.3	70.44	65.24	49.04	29.4	30.79	80.97	91.4	89.98	82.1	52	66.46	36.9	40.59	35.74	44.15	43.14	53.83	33.11	39.63	35.11	40.98	51.34	48.8	1.96	1.74	1.83	1.11	0.68	0.57	2.45	2.31	2.56	2	1.01	1.36	1.9	1.32	1.85	1.4	0	0	0	0	0.215401	0.153016	0.0796096
Tb927.11.490	5.69	6.96	4.15	3.23	3.06	1.78	20.99	18.89	13.16	8.73	16.27	7.16	6.06	8.03	4.54	3.23	3.49	2.87	10.91	10.74	7.82	4.77	10.54	5.79	0.94	0.87	0.91	1	0.88	0.62	1.92	1.76	1.68	1.83	1.54	1.24	2.08	1.97	1.84	0.93	0	0	0	0	0.217862	0.0343944	0.291912
Tb927.4.3930	100.06	114.13	115.86	51.3	33.77	24.02	74.62	66.42	92.72	40.26	22.86	32.45	78.31	84.62	83.31	69.57	85.25	74.07	38.75	33.99	55.05	35.64	30.61	39.94	1.28	1.35	1.39	0.74	0.4	0.32	1.93	1.95	1.68	1.13	0.75	0.81	3.03	1.38	1.84	1.33	0	0	0	0	0.368717	0.301822	0.0144501
Tb927.11.7350	88.03	92.48	91.25	46.38	27.37	15.65	125.79	156.18	105.44	69.05	104.3	52	85.79	86.85	95.22	51.96	36.15	23.45	92.38	109.18	94.05	46.92	66.49	43.47	1.03	1.06	0.96	0.89	0.76	0.67	1.36	1.43	1.12	1.47	1.57	1.2	3.04	1.28	1.83	1.43	0	0	0	0	0.572088	0.0133617	0.503308
Tb927.2.4920	41.79	35.65	38.23	16.65	6.16	5.56	36.24	31.03	37.56	11.48	9.07	4.76	33.99	31.05	35.13	20.27	9.7	13.82	20.65	17.98	25.69	8.53	7.15	6.08	1.23	1.15	1.09	0.82	0.64	0.4	1.75	1.73	1.46	1.35	1.27	0.78	4.08	1.42	1.83	1.29	0	0	0	0	0.378382	0.0954822	0.09387
Tb927.11.4660	41.34	39.52	36.61	15.3	3.4	2.75	45.86	50.95	65.21	16.86	13.58	10.6	15.81	14.48	13.7	7.89	4.8	3.15	13.08	14.57	24.47	6.65	6.64	5.7	2.61	2.73	2.67	1.94	0.71	0.87	3.51	3.5	2.66	2.54	2.05	1.86	5.48	1.21	1.83	1.51	0	0	0	0	0.74753	0.136334	0.0512906
Tb927.10.4420	5.31	4.72	3.71	4.75	5.87	5.96	14.21	14.12	16.65	7.01	22.6	12.43	2.12	1.72	1.18	1.09	0.92	0.57	1.63	1.89	1.93	1.22	1.37	0.75	2.5	2.74	3.14	4.36	6.38	10.46	8.72	7.47	8.63	5.75	16.5	16.57	0.83	2.96	1.83	0.62	1	0	0	0	0.142641	0.251961	0.336994
Tb927.8.2320	57.98	56.78	57.38	47.21	42.84	31.3	54.26	54.08	52.83	34.07	65.63	36.83	12.62	9.45	11.61	5.54	2.72	2.29	7.11	7.65	8.6	1.68	2.18	1.98	4.59	6.01	4.94	8.52	15.75	13.67	7.63	7.07	6.14	20.28	30.11	18.6	1.42	1.34	1.82	1.36	0	0	0	0	0.461068	0.100864	0.0545473
Tb927.8.4750	4.4	4.94	4.76	2.79	1.5	1.2	8.24	10.25	7.45	4.32	6.74	3.72	66.24	70.49	70.48	53.83	49.15	45.63	82.06	94.12	100.8	77.99	76.42	76.35	0.07	0.07	0.07	0.05	0.03	0.03	0.1	0.11	0.07	0.06	0.09	0.05	2.57	1.33	1.82	1.37	0	0	0	0	0.754332	0.121144	0.204722
Tb927.9.10640	40.01	39.13	39.49	12.81	5.24	3.55	48.45	56.87	61.76	25.29	22.75	22.65	10.29	12.24	10.65	6.89	5.97	4.87	13.42	17.98	15.09	9.04	16.67	10.55	3.89	3.2	3.71	1.86	0.88	0.73	3.61	3.16	4.09	2.8	1.36	2.15	5.49	1.01	1.82	1.8	0	0	0	0	0.993531	0.194195	0.0560886
Tb927.10.10600	11.54	11.3	6.41	5.32	5.34	6.99	28.51	23.58	19.24	8.89	30.46	17.71	3.24	5.58	5.72	4.53	5.63	5.73	5.64	6.05	5	6.65	10.54	9.8	3.56	2.03	1.12	1.17	0.95	1.22	5.05	3.9	3.85	1.34	2.89	1.81	1.66	1.91	1.81	0.95	0	0	0	0	0.579418	0.270259	0.0307658
Tb927.11.1150	57.15	52.53	44.21	19.83	19.21	14.5	112.07	96.09	84.05	46.21	95.33	60.05	57.9	57.21	51.45	31.69	28.09	23.22	72.9	69.43	67.62	44.17	79.77	50.16	0.99	0.92	0.86	0.63	0.68	0.62	1.54	1.38	1.24	1.05	1.2	1.2	2.87	1.5	1.79	1.19	0	0	0	0	0.370274	0.00530495	0.104625
Tb927.2.5800	68.48	73.36	64.15	49.17	42.41	28.32	92.3	95.6	95.13	63.22	71.3	57.41	15.6	17.52	13.09	13.38	14.22	11.64	11.16	10.91	12.98	11.12	13.99	10.46	4.39	4.19	4.9	3.67	2.98	2.43	8.27	8.76	7.33	5.69	5.1	5.49	1.72	1.81	1.79	0.99	0	0	0	0	0.235282	0.0178632	0.0231652
Tb927.8.4940	67.15	69.67	70.74	44.11	18.73	17.6	63.5	70.62	79.19	34.98	26.86	20.3	2.82	2.83	2.92	2.53	2.33	2.41	2.26	1.28	2.19	1.47	1.32	1.41	23.81	24.62	24.23	17.43	8.04	7.3	28.1	55.17	36.16	23.8	20.35	14.4	2.58	1.64	1.79	1.09	0	0	0	0	0.753793	0.12758	0.126792
Tb927.2.6000	14.48	9.54	5.67	3.57	2.57	4.82	19.27	14.65	14.79	4.93	8.56	9.09	28.43	20.92	13.35	11.51	11.89	15.13	26.13	23	26.25	7.97	22.55	17.99	0.51	0.46	0.42	0.31	0.22	0.32	0.74	0.64	0.56	0.62	0.38	0.51	2.71	1.4	1.78	1.27	0	0	0	0	0.486783	0.0735144	0.191929
Tb927.5.3720	27.35	23.67	24.44	20.36	17.61	18.17	60.95	70.62	46.3	76.37	78.15	62.88	15.6	15.51	14.49	14.25	13.93	18.17	21.07	28.35	19.65	28.08	40.9	33.3	1.75	1.53	1.69	1.43	1.26	1	2.89	2.49	2.36	2.72	1.91	1.89	1.34	1.56	1.77	1.13	0	0	0	0	0.365112	0.059474	0.297031
Tb927.7.6490	12.12	6.23	4.15	3.53	0.63	0.17	13.42	10.04	8.93	1.83	4.66	0.75	14.19	10.01	7.11	9.33	7.67	8.77	14.17	9.92	10.64	6.19	10.79	6.12	0.85	0.62	0.58	0.38	0.08	0.02	0.95	1.01	0.84	0.3	0.43	0.12	5.2	1.37	1.77	1.29	0	0	0	0	0.562105	1.1119	0.0179238
Tb927.11.13420	29.05	31.96	29.63	23.19	17.18	13.93	42.35	49.96	38.63	32.7	37.1	27.74	16.48	17.35	16.36	18.18	17.71	17.43	14.38	14.53	13.83	17.11	20.47	16.96	1.76	1.84	1.81	1.28	0.97	0.8	2.95	3.44	2.79	1.91	1.81	1.64	1.67	1.7	1.76	1.04	0	0	0	0	0.373673	0.0274515	0.0230051
Tb927.10.6580	35.15	35.48	22.56	16.08	5.87	4.53	56.23	67.12	54.5	32.29	18.8	17.29	52.5	50.99	34.34	44.33	33.04	22.36	61.87	67.94	56.43	57.78	52.1	45.36	0.67	0.7	0.66	0.36	0.18	0.2	0.91	0.99	0.97	0.56	0.36	0.38	3.52	1.41	1.76	1.25	0	0	0	0	0.164763	0.224494	0.0184268
Tb927.7.5380	1.7	2.02	1.05	0.65	0.87	0.52	51.5	49.22	54.53	41.99	49.11	52.05	2.12	1.46	1.22	0.7	1.65	2.06	71.9	87	68.81	33.56	94.11	41.82	0.8	1.38	0.86	0.93	0.53	0.25	0.72	0.57	0.79	1.25	0.52	1.24	2.34	0.68	1.76	2.59	0	0	0	0	0.776112	0.249818	0.340993
Tb927.5.1480	1.58	2.58	2.31	0.78	0.73	0.52	8.9	16.17	13.05	2.28	7.8	2.54	11.87	12.67	13.27	11.99	11.69	13.87	36.24	65.93	58.87	24.68	57.32	38.86	0.13	0.2	0.17	0.07	0.06	0.04	0.25	0.25	0.22	0.09	0.14	0.07	3.19	1.44	1.76	1.22	0	0	0	0	0.479024	0.322143	0.0202678
Tb927.8.5760	84.17	78.56	84	28.51	19.75	12.04	117.38	131.07	151.07	57.38	76.88	64.62	89.56	83.16	94.04	60.76	61.43	58.71	97.07	108.56	128.76	88.6	142.1	113.7	0.94	0.94	0.89	0.47	0.32	0.21	1.21	1.21	1.17	0.65	0.54	0.57	4.09	1.3	1.76	1.35	0	0	0	0	0.0762105	0.749376	0.0106473
Tb927.10.13780	28.6	24.61	20.2	12.55	13.34	8.6	82.48	67.45	81.82	24.37	40.04	35.04	181.24	142.39	121.53	83.43	59.1	56.76	220.8	201.4	232.78	73.12	156.59	103.67	0.16	0.17	0.17	0.15	0.23	0.15	0.37	0.33	0.35	0.33	0.26	0.34	2.13	2.1	1.75	0.83	1	0	0	0	0.166941	0.0234138	0.264368
Tb927.3.4560	11	11.55	11.52	1.31	0.58	0.4	20.4	26.79	30.66	7.21	6.18	4.85	17.06	16.84	17.8	5.27	4.95	2.47	41.09	46.34	44.82	14.06	36.23	19.64	0.64	0.69	0.65	0.25	0.12	0.16	0.5	0.58	0.68	0.51	0.17	0.25	14.88	0.89	1.75	1.97	0	0	0	0	0.820628	0.361125	0.107493
Tb927.3.5190	38.31	32.69	36.09	10.11	5.05	2.47	38.84	32.51	46.34	12.24	11.96	11.73	30.38	27.53	29.98	15.43	10.48	7.17	31.73	26.3	35.22	12.14	18.29	12.95	1.26	1.19	1.2	0.66	0.48	0.34	1.22	1.24	1.32	1.01	0.65	0.91	6.07	1.04	1.74	1.67	0	0	0	0	0.835905	0.0754843	0.0648672
Tb927.11.16390	28.72	29.64	28.58	15.52	8.01	5.79	40.8	41.93	33.92	18.23	33.6	15.21	77.78	78.69	78.37	74.23	64.68	63.12	92.97	98.15	86.86	84.49	108.35	76.49	0.37	0.38	0.36	0.21	0.12	0.09	0.44	0.43	0.39	0.22	0.31	0.2	2.97	1.14	1.74	1.53	0	0	0	0	0.53718	0.153883	0.0304971
Tb927.8.1780	12.82	13.4	13	3.01	0.78	0.29	27	31.77	40.22	6.65	2.94	4.1	21.54	20.1	19.59	15.39	9.85	9.69	37.41	44.16	60.73	22.19	30.31	29.77	0.6	0.67	0.66	0.2	0.08	0.03	0.72	0.72	0.66	0.3	0.1	0.14	9.61	1.09	1.74	1.6	0	0	0	0	0.66964	0.882854	0.0186941
Tb927.9.12590	140.11	191.14	137.46	92.54	74.82	53.43	184.56	215.68	185.18	158.27	123.65	130.09	42.37	56.44	41.67	42.63	48.18	37.38	37.04	36.13	31.99	50.42	44.39	43.9	3.31	3.39	3.3	2.17	1.55	1.43	4.98	5.97	5.79	3.14	2.79	2.96	2.12	1.67	1.73	1.04	0	0	0	0	0.365611	0.0446206	0.0185654
Tb927.8.4510	53	52.96	53.72	34.26	20.33	25.8	83.9	93.09	89.53	67.53	40.85	56.9	21.5	22.81	20.73	21.92	23.53	30.56	21.78	24.77	23.21	27.77	28.38	32.03	2.47	2.32	2.59	1.56	0.86	0.84	3.85	3.76	3.86	2.43	1.44	1.78	1.99	1.55	1.73	1.12	0	0	0	0	0.127246	0.151733	0.0302803
Tb927.6.850	24.61	16.24	9.38	6.45	6.16	4.59	37.29	23.5	31.7	11.27	27.92	19.22	86.66	67.78	41.67	28.94	21.45	17.03	134.35	89.55	104.21	26.96	76.98	34.15	0.28	0.24	0.23	0.22	0.29	0.27	0.28	0.26	0.3	0.42	0.36	0.56	2.92	1.12	1.72	1.54	0	0	0	0	0.757202	0.0827206	0.112745
Tb927.7.480	43.54	36.81	37.49	20.31	9.12	7.68	67.6	72.59	76.45	33.21	30.31	20.39	13.24	11.86	12.92	10.85	10.87	8.03	12.92	14.98	16.02	11.58	17.99	11.49	3.29	3.1	2.9	1.87	0.84	0.96	5.23	4.85	4.77	2.87	1.68	1.77	3.18	1.6	1.72	1.08	0	0	0	0	0.109566	0.30864	0.0202698
Tb927.10.8570	58.19	60.78	58.74	52.74	37.07	36.29	66.38	69.55	68.73	75.15	52.1	61.65	13.03	13.87	14.66	16.43	16.45	16.97	11.66	10.78	9.97	13.86	13.84	16.2	4.47	4.38	4.01	3.21	2.25	2.14	5.69	6.45	6.89	5.42	3.76	3.81	1.41	1.48	1.71	1.16	0	0	0	0	0.366189	0.0731349	0.0544287
Tb927.8.910	17.1	12.59	5.8	14.12	14.41	4.3	72.24	55.15	58.39	27.72	43.43	26.42	25.07	18.08	9.29	21.49	23.73	30.73	67.01	56.54	58.39	27.52	55.44	44.04	0.68	0.7	0.62	0.66	0.61	0.14	1.08	0.98	1	1.01	0.78	0.6	1.08	1.53	1.7	1.11	0	0	0	0	0.124077	0.204233	0.208001
Tb927.7.4690	7.64	6.53	6.72	5.14	3.64	4.3	13.29	11.44	12.49	10.05	5.22	7.82	156.34	104.33	84.88	102.26	70.36	41.79	126.75	82.06	87.46	66.57	93.75	61.28	0.05	0.06	0.08	0.05	0.05	0.1	0.1	0.14	0.14	0.15	0.06	0.13	1.6	2	1.7	0.85	0	0	0	0	0.372954	0.235254	0.700106
Tb927.11.8090	17.43	17.01	18.85	5.01	1.41	1.38	18.39	22.55	27.32	5.84	3.29	3.49	115.25	105.71	108.35	79.29	66.28	61.92	92.13	94.86	128.72	69.56	73.64	75.83	0.15	0.16	0.17	0.06	0.02	0.02	0.2	0.24	0.21	0.08	0.04	0.05	6.83	1.35	1.7	1.26	0	0	0	0	0.395997	3.94891	0.01061
Tb927.10.6210	65.74	62.28	57.86	63.46	53.52	45	95.06	86.3	102.1	115.31	78.6	94.43	19.01	18.6	17.41	20.44	22.42	23.33	17.26	19.05	17.94	21.83	24.27	23.64	3.46	3.35	3.32	3.1	2.39	1.93	5.51	4.53	5.69	5.28	3.24	3.99	1.15	1.55	1.69	1.09	0	0	0	0	0.430821	0.0903955	0.22633
Tb927.9.13510	19.22	17.87	17.72	5.1	1.26	1.03	24.08	29.1	29.73	6.55	8.01	8.53	7.1	8.81	8.38	3.09	1.55	0.8	8.57	9.96	10.49	2.59	5.22	3.77	2.71	2.03	2.11	1.65	0.81	1.29	2.81	2.92	2.83	2.53	1.53	2.26	7.42	1.25	1.69	1.35	0	0	0	0	0.647576	0.101467	0.139511
Tb927.5.1460	101.8	131.78	138.29	60.24	53.08	40.76	132.1	187.62	177.88	96.32	119.19	128.44	75.95	100.12	100.41	65.56	78.31	54.75	73.2	107.04	106.25	63.67	116.15	92.79	1.34	1.32	1.38	0.92	0.68	0.74	1.8	1.75	1.67	1.51	1.03	1.38	2.41	1.29	1.68	1.3	0	0	0	0	0.195981	0.053401	0.0963712
Tb927.8.8020	14.61	12.41	13.83	7.24	4.71	3.38	20.73	25.35	20.98	19.45	20.58	13.52	18.76	14.56	11.91	9.15	6.55	6.59	22.03	21.93	19.87	12.8	22.3	14.13	0.78	0.85	1.16	0.79	0.72	0.51	0.94	1.16	1.06	1.52	0.92	0.96	2.66	1.13	1.68	1.49	0	0	0	0	0.869755	0.127826	0.734758
Tb927.5.3790	19.76	25.43	16.58	4.53	1.21	0.86	26.17	31.24	34.7	5.38	9.48	3.77	16.97	19.84	14.36	4.79	2.96	1.26	17.43	21.65	25.06	3.86	9.48	3.72	1.16	1.28	1.15	0.95	0.41	0.68	1.5	1.44	1.38	1.39	1	1.01	9.36	1.2	1.67	1.39	0	0	0	0	0.315801	0.098628	0.14298
Tb927.1.4340	53.33	44.89	37.22	18.79	10.38	8.08	62.83	60.45	71.81	27.52	35.22	37.26	32.29	28.05	24.61	23.84	24.99	25.45	46.61	51.77	46.45	27.37	55.59	40.69	1.65	1.6	1.51	0.79	0.42	0.32	1.35	1.17	1.55	1.01	0.63	0.92	3.64	0.86	1.67	1.94	0	0	0	0	0.713076	0.17706	0.0436181
Tb927.11.5860	17.14	15.81	16.23	8.37	4.61	3.96	13.34	11.4	14.68	9.29	6.94	5.28	12.28	10.74	10.82	11.59	7.62	6.59	7.94	6.79	9.45	6.25	7.4	6.88	1.4	1.47	1.5	0.72	0.6	0.6	1.68	1.68	1.55	1.49	0.94	0.77	2.9	1.12	1.67	1.49	0	0	0	0	0.42731	0.20361	0.126093
Tb927.5.2390	8.59	6.92	6.89	4.36	4.12	4.3	17.14	20.78	17.02	11.12	19.66	13.42	8.47	6.36	6.41	4.79	3.35	3.5	10.07	11.61	11.23	5.53	11.15	7.39	1.01	1.09	1.07	0.91	1.23	1.23	1.7	1.79	1.52	2.01	1.76	1.82	1.75	1.58	1.66	1.05	0	0	0	0	0.311378	0.00706256	0.164367
Tb927.11.2150	36.94	42.22	37.57	34.87	24.84	22.42	52.42	59.14	53.35	59.86	50.37	52.33	26.31	28.48	22.74	27.55	23.53	23.1	27.21	28.89	23.65	31.48	32.03	26.71	1.4	1.48	1.65	1.27	1.06	0.97	1.93	2.05	2.26	1.9	1.57	1.96	1.42	1.38	1.65	1.2	0	0	0	0	0.312139	0.0121408	0.172085
Tb927.11.15480	47.02	49.22	45.3	36.79	38.62	21.67	55.56	54.16	41.34	52.5	71.66	46.68	17.31	18.34	18.63	14.34	19.8	13.99	15.17	14.49	10.08	14.27	19.87	17.14	2.72	2.68	2.43	2.57	1.95	1.55	3.66	3.74	4.1	3.68	3.61	2.72	1.46	1.47	1.65	1.12	0	0	0	0	0.190676	0.0396823	0.259614
Tb927.7.7270	46.23	43.17	40.63	19	8.69	6.59	56.81	61.81	69.59	29.6	22.1	21.05	16.6	13.4	14.49	12.34	8.98	8.71	18.85	18.07	14.24	13.61	16.17	11.35	2.78	3.22	2.8	1.54	0.97	0.76	3.01	3.42	4.89	2.17	1.37	1.85	3.79	1.29	1.65	1.28	0	0	0	0	0.81868	0.115594	0.0686409
Tb927.2.690	13.45	8.12	9.86	3.09	1.07	1.15	12.71	6.5	10.05	1.47	3.45	1.13	21.46	11.34	11.04	5.88	3.49	1.89	11.83	4.98	7.34	2.18	2.94	2.07	0.63	0.72	0.89	0.53	0.31	0.61	1.07	1.31	1.37	0.67	1.17	0.55	5.92	1.67	1.65	0.99	0	0	0	0	0.350236	0.259017	0.135803
Tb927.9.15630	12.62	11.12	9.82	6.76	4.22	3.21	23.7	20.29	15.68	11.68	14.14	9.51	10.42	8.68	9.47	7.45	5.24	5.39	14.59	13.87	10.6	8.12	13.13	7.44	1.21	1.28	1.04	0.91	0.81	0.6	1.62	1.46	1.48	1.44	1.08	1.28	2.37	1.29	1.64	1.27	0	0	0	0	0.374965	0.0265877	0.131418
Tb927.9.8240	25.23	23.32	22.47	9.72	4.76	4.3	39.92	43.87	43.45	19.35	21.64	17.38	9.88	9.32	8.86	5.49	4.12	3.84	10.12	11.65	13.42	6.45	12.62	8.9	2.55	2.5	2.54	1.77	1.16	1.12	3.94	3.77	3.24	3	1.71	1.95	3.78	1.44	1.64	1.14	0	0	0	0	0.425921	0.176046	0.0586031
Tb927.4.5310	10.33	7.3	4.15	1.39	0.73	0.4	16.22	12.88	9.97	2.08	3.24	1.74	40.59	23.75	13.18	10.85	7.62	7.62	50.87	36.3	31.14	9.19	28.79	14.7	0.25	0.31	0.31	0.13	0.1	0.05	0.32	0.35	0.32	0.23	0.11	0.12	8.64	1.14	1.64	1.44	0	0	0	0	0.737252	0.337481	0.0469188
Tb927.10.12030	13.57	8.29	4.45	2.14	1.07	0.86	18.1	14.4	15.2	1.93	6.18	2.21	108.45	63.79	31.2	29.77	28.05	28.03	98.49	69.18	68.36	23.36	66.84	38.48	0.13	0.13	0.14	0.07	0.04	0.03	0.18	0.21	0.22	0.08	0.09	0.06	6.46	1.53	1.64	1.07	0	0	0	0	0.372444	0.91208	0.0115255
Tb927.6.600	24.78	13.19	12.61	12.81	13.44	20.12	80.76	79.88	53.42	48.59	69.53	57.56	43.54	30.24	25.44	26.81	24.84	33.6	94.89	92.22	69.85	50.98	96.64	59.25	0.57	0.44	0.5	0.48	0.54	0.6	0.85	0.87	0.76	0.95	0.72	0.97	1.09	1.64	1.63	0.99	0	0	0	0	0.199039	0.0364496	0.598707
Tb927.4.4190	15.19	16.28	12.92	8.89	3.2	2.64	21.28	23.87	16.68	11.27	13.33	6.17	24.15	21.82	20.38	18.44	10.97	9.23	27.13	29.3	24.36	16.45	25.03	12.01	0.63	0.75	0.63	0.48	0.29	0.29	0.78	0.81	0.68	0.69	0.53	0.51	3.01	1.13	1.63	1.44	0	0	0	0	0.758208	0.0684517	0.0779622
Tb927.10.780	17.14	15.63	14.1	4.88	1.36	1.03	35.32	34.24	28.66	8.02	8.21	3.77	30.92	29.17	29.33	19.66	10.53	7.45	44.48	49.84	47.53	22.19	30.2	17.14	0.55	0.54	0.48	0.25	0.13	0.14	0.79	0.69	0.6	0.36	0.27	0.22	6.45	1.32	1.63	1.23	0	0	0	0	0.554198	0.385209	0.0157651
Tb927.10.9750	23.45	21.73	21.16	3.84	1.41	1.89	22.41	24.61	40.52	5.18	3.29	3.25	24.53	22.29	22.39	16.48	17.9	21.21	21.28	20.21	41.74	13.96	23.46	24.02	0.96	0.97	0.95	0.23	0.08	0.09	1.05	1.22	0.97	0.37	0.14	0.14	9.29	1.13	1.63	1.44	0	0	0	0	0.801233	3.59168	0.0108081
Tb927.8.950	54.24	48.06	40.28	17.43	6.7	4.3	109.31	103.75	84.45	23.1	34	16.01	13.7	13.36	11	8.19	5.82	4.87	16.76	17	17.13	8.28	16.27	8.57	3.96	3.6	3.66	2.13	1.15	0.88	6.52	6.1	4.93	2.79	2.09	1.87	5.02	1.56	1.62	1.04	0	0	0	0	0.458455	0.414405	0.016467
Tb927.7.6970	38.72	35.87	34.04	13.42	5.63	4.19	46.94	45.89	59.69	16.2	9.83	12.81	104.75	100.38	96.92	70.35	52.55	56.99	94.85	95.06	117.86	64.79	72.72	62.03	0.37	0.36	0.35	0.19	0.11	0.07	0.49	0.48	0.51	0.25	0.14	0.21	4.67	1.37	1.62	1.18	0	0	0	0	0.10247	0.4232	0.0186004
Tb927.7.4180	128.62	131.05	125.46	37.18	27.85	25.05	174.28	202.56	149.41	72.96	111.49	53.36	132.43	136.42	135.41	64.25	69.05	51.94	150.03	168.69	149.37	81.44	134.25	85.72	0.97	0.96	0.93	0.58	0.4	0.48	1.16	1.2	1	0.9	0.83	0.62	4.28	1.17	1.61	1.38	0	0	0	0	0.632796	0.064084	0.046004
Tb927.9.2590	78.44	70.06	70.3	29.33	17.81	18.17	84.48	87.86	101.54	57.43	42.92	57.6	25.32	22.34	22.3	10.42	4.46	4.93	20.02	17.41	20.69	8.43	11.45	9.14	3.1	3.14	3.15	2.81	3.99	3.69	4.22	5.05	4.91	6.81	3.75	6.3	3.35	1.51	1.61	1.07	0	0	0	0	0.38915	0.146198	0.459943
Tb927.6.830	18.88	16.15	16.02	9.94	9.46	14.39	24.71	26.05	20.58	15.99	35.73	25.06	29.67	23.45	27.36	19.83	16.35	14.33	33.57	32.31	32.14	18.18	27.82	21.9	0.64	0.69	0.59	0.5	0.58	1	0.74	0.81	0.64	0.88	1.28	1.14	1.51	1.14	1.59	1.39	0	0	0	0	0.765475	0.125627	0.0811147
Tb927.6.1920	21.5	21.39	19.24	4.75	1.6	1.38	24.79	25.02	31.99	3.86	4.36	3.72	47.6	46.22	44.25	19.4	11.31	10.55	42.72	44.73	68.44	13.1	19.16	12.67	0.45	0.46	0.43	0.24	0.14	0.13	0.58	0.56	0.47	0.29	0.23	0.29	8.04	1.2	1.59	1.33	0	0	0	0	0.636222	0.264829	0.0157832
Tb927.9.15480	15.44	8.55	7.03	2.96	1.36	1.03	17.85	16.21	16.68	3.71	8.26	2.78	4.9	3.09	2.4	1.83	2.13	1.72	3.6	3.7	3.26	1.88	5.02	2.97	3.15	2.77	2.93	1.62	0.64	0.6	4.96	4.38	5.12	1.97	1.65	0.94	5.8	1.63	1.59	0.98	0	0	0	0	0.246293	2.25789	0.0111377
Tb927.9.4050	43.08	49.48	43.42	45.85	48.38	45.63	67.39	78.48	63.88	95.1	86.51	84.78	5.93	5.71	6.89	9.98	14.22	13.64	8.61	6.91	6.3	15.03	16.17	13.56	7.26	8.67	6.3	4.59	3.4	3.35	7.83	11.36	10.14	6.33	5.35	6.25	0.97	1.32	1.58	1.2	0	0	0	0	0.68937	0.0171919	0.0666089
Tb927.11.16830	46.07	48.19	47.96	28.51	23.78	17.14	78.8	106.22	75.63	62.71	80.43	48.04	57.44	62.37	57.34	45.46	53.33	50.97	100.83	106.42	102.92	72.71	97.61	84.45	0.8	0.77	0.84	0.63	0.45	0.34	0.78	1	0.73	0.86	0.82	0.57	2.05	1.04	1.58	1.52	0	0	0	0	0.962513	0.0918685	0.531696
Tb927.7.2660	16.14	12.03	9.21	3.79	2.38	2.98	20.19	22.63	24.65	4.27	5.68	4.24	185.14	133.5	92.6	79.76	68.71	71.49	145.81	112.97	164.09	45.29	120.87	78.09	0.09	0.09	0.1	0.05	0.03	0.04	0.14	0.2	0.15	0.09	0.05	0.05	4.09	1.75	1.58	0.9	0	0	0	0	0.513415	0.359701	0.0245854
Tb927.11.4800	16.23	14.82	16.02	5.93	2.43	2.52	25.92	26.58	29.88	14.67	8.82	10.97	17.56	15.55	16.32	13.25	12.52	15.65	23.91	22.68	23.62	24.68	30.36	28.59	0.92	0.95	0.98	0.45	0.19	0.16	1.08	1.17	1.27	0.59	0.29	0.38	4.33	1.24	1.58	1.27	0	0	0	0	0.461335	1.1224	0.0144986
Tb927.9.11640	25.11	23.97	21.64	13.03	12.71	16.05	37.54	40.45	35.41	26	40.19	31.23	43.91	40.2	41.63	30.42	28.97	26.66	45.94	48.77	50.16	36.15	51.24	38.48	0.57	0.6	0.52	0.43	0.44	0.6	0.82	0.83	0.71	0.72	0.78	0.81	1.69	1.4	1.57	1.12	0	0	0	0	0.324939	0.0215869	0.748794
Tb927.9.8400	92.72	85.69	90.38	59.5	33.24	39.5	98.57	100.95	102.43	88.4	58.18	78.7	19.34	23.45	21.78	20.14	16.06	17.94	15.09	18.03	19.69	19.04	18.14	22.33	4.79	3.65	4.15	2.95	2.07	2.2	6.53	5.6	5.2	4.64	3.21	3.52	2.03	1.38	1.57	1.14	0	0	0	0	0.455536	0.0878235	0.0376193
Tb10.v4.0218	10.67	7.82	10.74	4.66	3.2	2.01	6.06	3.83	5.38	1.93	2.99	1.93	1.95	1.89	1.92	1.31	1.36	0.63	1.25	0.58	1.11	0.41	0.51	0.52	5.47	4.14	5.59	3.56	2.35	3.19	4.85	6.6	4.85	4.71	5.86	3.71	2.96	1.07	1.57	1.47	0	0	0	0	0.940499	0.0921032	0.485631
Tb927.4.1870	23.86	21.95	15.06	7.54	4.66	2.35	29.26	27.12	31.48	5.79	12.97	6.08	130.28	85.78	81.52	76.45	47.65	22.99	114.04	94.41	90.57	51.64	69.68	36.41	0.18	0.26	0.18	0.1	0.1	0.1	0.26	0.29	0.35	0.11	0.19	0.17	4.18	1.45	1.57	1.08	0	0	0	0	0.539565	0.226906	0.0259456
Tb927.9.12790	37.48	32.82	35.83	6.45	2.23	0.97	33.74	38.31	56.5	5.23	3.45	2.97	54.16	45.36	49.49	19.35	15.04	10.09	41.93	38.93	61.99	10	21.49	13.19	0.69	0.72	0.72	0.33	0.15	0.1	0.8	0.98	0.91	0.52	0.16	0.23	11	1.26	1.57	1.25	0	0	0	0	0.530166	0.690614	0.0281652
Tb927.9.12000	43.83	41.66	43.81	15.6	7.08	4.87	57.6	63.66	61.17	22.59	16.37	16.2	42.04	40.98	42.24	29.64	24.94	17.83	42.14	45.47	47.01	30.31	38.36	32.07	1.04	1.02	1.04	0.53	0.28	0.27	1.37	1.4	1.3	0.75	0.43	0.51	4.69	1.31	1.56	1.19	0	0	0	0	0.259772	0.396542	0.0195355
Tb927.11.12710	5.35	4.6	3.58	1.05	0.73	0.34	7.44	9.84	10.27	1.37	3.45	1.37	3.36	3.57	2.71	2.05	3.35	4.93	3.85	5.19	5.41	3.45	5.73	5.51	1.59	1.29	1.32	0.51	0.22	0.07	1.93	1.9	1.9	0.4	0.6	0.25	6.38	1.36	1.56	1.15	0	0	0	0	0.428061	1.46142	0.0150251
Tb927.7.5940	220.71	221.12	208.81	70.04	33.63	22.59	222.56	188.32	237.05	78.8	65.02	42.81	114.63	120.05	118.04	63.94	55.12	44.89	73.24	57.66	97.91	54.74	56.61	51.01	1.93	1.84	1.77	1.1	0.61	0.5	3.04	3.27	2.42	1.44	1.15	0.84	5.15	1.58	1.55	0.98	0	0	0	0	0.474189	0.48238	0.0173224
Tb927.3.4830	4.4	5.33	4.15	2.35	1.12	1.38	8.03	12.88	12.16	6.25	5.37	4.9	12.49	12.54	12.04	5.62	2.91	1.95	17.6	23.54	25.51	6.09	10.9	6.03	0.35	0.43	0.34	0.42	0.38	0.71	0.46	0.55	0.48	1.03	0.49	0.81	2.86	1.33	1.54	1.16	0	0	0	0	0.443421	0.244605	0.226734
Tb927.7.1590	30.09	30.24	26.53	8.59	5.05	3.61	38.5	47.04	56.61	9.65	11	10.97	27.02	24.91	24.35	18.7	15.82	13.76	32.77	38.15	48.9	15.89	26.4	19.22	1.11	1.21	1.09	0.46	0.32	0.26	1.17	1.23	1.16	0.61	0.42	0.57	5.04	1.04	1.54	1.48	0	0	0	0	0.837569	0.350579	0.0141801
Tb927.8.7960	15.9	12.46	12.83	5.19	0.97	0.92	27.55	27.08	28.44	7.11	5.37	5.84	14.07	13.74	12.92	6.97	3.78	2.29	24.62	27.57	29.32	6.85	13.73	8.1	1.13	0.91	0.99	0.74	0.26	0.4	1.12	0.98	0.97	1.04	0.39	0.72	5.82	1.01	1.54	1.52	0	0	0	0	0.986524	0.373005	0.253843
Tb927.7.3970	35.73	22.03	9.69	7.71	3.11	1.66	57.56	47.41	39.11	8.73	13.02	7.82	113.88	75.25	35.17	47.95	41.2	41.68	162.28	132.55	122.23	42.14	127.86	65.52	0.31	0.29	0.28	0.16	0.08	0.04	0.35	0.36	0.32	0.21	0.1	0.12	5.4	1.17	1.54	1.32	0	0	0	0	0.424378	0.554961	0.0278323
Tb927.10.350	11.99	12.59	12.18	2.53	0.49	0.57	21.49	22.92	27.21	3.3	3.8	2.54	32.79	30.32	30.24	17.22	11.35	8.54	39.46	42.76	59.13	18.03	35.58	22.09	0.37	0.42	0.4	0.15	0.04	0.07	0.54	0.54	0.46	0.18	0.11	0.11	10.24	1.29	1.54	1.19	0	0	0	0	0.417791	6.69806	0.00990867
Tb927.2.1740	15.9	13.62	9.43	9.02	4.71	3.21	23.54	22.96	11.38	19.4	11.45	8.67	87.98	78.6	50.93	68.91	59.54	34.11	95.44	97.33	62.06	105.36	87.27	58.73	0.18	0.17	0.19	0.13	0.08	0.09	0.25	0.24	0.18	0.18	0.13	0.15	2.3	1.24	1.53	1.23	0	0	0	0	0.740094	0.0751156	0.0751256
Tb927.1.1380	5.73	5.8	6.07	2.27	0.44	0.69	18.27	23.95	17.8	12.44	11.2	8.2	4.36	3.99	3.14	2.57	1.12	0.97	9.49	13.46	10.05	10.61	12.82	8.29	1.31	1.45	1.93	0.88	0.39	0.71	1.93	1.78	1.77	1.17	0.87	0.99	5.18	1.17	1.53	1.31	0	0	0	0	0.822617	0.557148	0.0136632
Tb927.8.5190	15.85	15.38	14.14	7.5	3.11	2.01	25.04	28.64	27.21	12.64	15.46	12.81	9.88	10.22	11.3	6.23	3.06	2.52	14.55	15.1	15.16	7.97	10.34	8.57	1.6	1.5	1.25	1.2	1.02	0.8	1.72	1.9	1.79	1.59	1.5	1.49	3.6	1.24	1.52	1.23	0	0	0	0	0.503792	0.060371	0.0261889
Tb927.11.14070	4.27	3.87	3.32	1.31	0.24	0.52	17.64	26.91	24.25	11.22	7.8	7.44	2.91	2.71	2.75	1.96	0.49	0.57	12.12	18.68	13.27	7.97	11.76	6.92	1.47	1.43	1.21	0.67	0.49	0.91	1.46	1.44	1.83	1.41	0.66	1.08	5.54	1.15	1.52	1.32	0	0	0	0	0.802301	0.262952	0.132543
Tb927.4.4370	27.47	30.67	29.11	12.95	7.57	6.42	34.86	36.83	37.81	24.58	11.1	17.66	80.22	79.12	75.54	59.71	49.06	41.68	111.36	102.43	101.4	67.68	83.97	59.53	0.34	0.39	0.39	0.22	0.15	0.15	0.31	0.36	0.37	0.36	0.13	0.3	3.24	0.93	1.52	1.63	0	0	0	0	0.846536	0.333255	0.363141
Tb927.2.3080	47.27	27.23	11.48	15.65	15.38	24.02	40.3	22.72	18.24	16.65	22.4	22.18	2.49	1.85	0.48	0.92	1.07	1.09	1.8	0.99	0.74	0.36	1.32	1.22	18.98	14.72	23.92	17.01	14.37	22.04	22.39	22.95	24.65	46.25	16.97	18.18	1.56	1.21	1.52	1.26	0	0	0	0	0.802477	0.43883	0.73767
Tb927.2.1310	14.32	9.54	8.6	2.75	1.89	0.57	13.29	9.96	10.31	1.57	2.53	0.75	18.14	9.84	8.29	4.93	2.81	2.01	10.24	5.1	5.86	1.32	3.9	1.65	0.79	0.97	1.04	0.56	0.67	0.28	1.3	1.95	1.76	1.19	0.65	0.45	6.23	1.79	1.52	0.85	0	0	0	0	0.472322	0.471341	0.0472551
Tb927.11.1420	28.47	29.9	25.22	5.4	1.6	1.55	19.94	21.77	30.92	4.57	3.7	4.33	4.44	4.85	5.32	3.66	7.13	10.32	3.8	4.03	5.75	3.05	5.07	7.3	6.41	6.16	4.74	1.48	0.22	0.15	5.25	5.4	5.38	1.5	0.73	0.59	9.78	0.93	1.52	1.63	0	0	0	0	0.903137	2.38312	0.014017
Tb927.10.5270	23.41	25.21	25.96	18.61	13.49	10.49	28.8	32.84	29.44	25.49	22.91	20.54	7.06	7.6	7.07	7.76	6.99	7.17	6.19	6.71	6.82	7.92	8.41	7.25	3.32	3.32	3.67	2.4	1.93	1.46	4.65	4.89	4.32	3.22	2.72	2.83	1.75	1.34	1.51	1.13	0	0	0	0	0.255896	0.322953	0.0117076
Tb927.1.4540	11.99	10.27	10.21	5.19	0.78	0.8	17.52	19.84	23.21	7.51	5.32	3.11	18.43	18.86	18.72	16.17	9.36	7.17	29.22	31.03	36.18	19.45	27.01	17.05	0.65	0.54	0.55	0.32	0.08	0.11	0.6	0.64	0.64	0.39	0.2	0.18	4.8	1.08	1.51	1.4	0	0	0	0	0.834984	0.593926	0.036936
Tb927.9.15450	46.69	38.14	27.4	24.37	24.79	27.35	35.91	32.84	41.97	22.24	33.4	32.64	11.99	10.7	7.72	8.46	12.57	15.31	8.78	8.97	10.01	8.23	8.16	10.27	3.89	3.56	3.55	2.88	1.97	1.79	4.09	3.66	4.19	2.7	4.09	3.18	1.47	1.09	1.5	1.38	0	0	0	0	0.758794	0.112444	0.258042
Tb927.6.2820	33.08	35.39	32.25	33.26	25.23	13.42	33.61	34.53	29.32	25.84	35.68	19.31	17.64	21.91	16.58	8.41	8.59	5.04	10.62	11.36	9.68	4.37	9.48	4.14	1.88	1.62	1.95	3.95	2.94	2.66	3.16	3.04	3.03	5.91	3.76	4.66	1.4	1.69	1.5	0.89	0	0	0	0	0.170414	0.120495	0.123073
Tb927.4.3620	35.11	36.55	32.86	19.44	8.01	6.71	44.06	50.12	47.75	26.45	16.52	15.83	117.58	134.83	127.16	104.3	89.96	68.05	132.64	142.27	164.38	99.32	114.48	101.55	0.3	0.27	0.26	0.19	0.09	0.1	0.33	0.35	0.29	0.27	0.14	0.16	3.06	1.17	1.5	1.28	0	0	0	0	0.619345	0.335761	0.0740073
Tb927.9.15510	15.36	9.45	9.16	5.58	2.86	1.32	29.89	21.32	18.91	8.48	11.91	4.38	1	1.03	0.7	0.92	0.73	0.46	1.3	1.28	1.41	0.96	1.88	1.08	15.36	9.17	13.09	6.07	3.92	2.87	22.99	16.66	13.41	8.83	6.34	4.06	3.48	1.41	1.5	1.06	0	0	0	0	0.767654	0.35147	0.0484716
Tb927.7.6320	11.75	11.6	9.51	2.14	0.44	0.17	17.52	20.33	20.43	2.94	3.04	2.12	12.53	11.55	11.3	6.71	4.37	8.54	18.81	24.53	25.4	7.72	21.64	14.7	0.94	1	0.84	0.32	0.1	0.02	0.93	0.83	0.8	0.38	0.14	0.14	11.95	0.92	1.5	1.63	0	0	0	0	0.824295	1.55354	0.0170773
Tb927.7.3040	25.69	22.12	18.94	2.75	0.58	0.8	28.13	29.18	40.89	2.49	2.28	2.5	68.81	50.94	47.61	31.21	23.87	23.68	74.2	73.33	101.51	26	58.69	34.01	0.37	0.43	0.4	0.09	0.02	0.03	0.38	0.4	0.4	0.1	0.04	0.07	16.16	0.98	1.5	1.53	0	0	0	0	0.966854	4.95333	0.0104705
Tb927.11.8450	26.6	25.3	29.06	11.68	6.55	6.76	33.69	33.58	35.59	13.3	15.41	11.82	32.08	32.99	32.38	23.01	17.27	13.87	28.59	24.82	30.84	16.45	23.51	19.97	0.83	0.77	0.9	0.51	0.38	0.49	1.18	1.35	1.15	0.81	0.66	0.59	3.24	1.47	1.49	1.01	0	0	0	0	0.303287	0.192984	0.0145403
Tb927.10.3990	221.17	114.13	39.89	21.58	12.62	5.5	158.56	101.89	82.12	22.7	33.85	23.46	182.24	96.99	31.11	44.02	34.6	22.82	161.53	84.28	56.28	31.84	78.35	49.31	1.21	1.18	1.28	0.49	0.36	0.24	0.98	1.21	1.46	0.71	0.43	0.48	9.45	0.99	1.49	1.51	0	0	0	0	0.994567	0.284153	0.0302163
Tb927.6.870	34.16	37.11	31.33	10.94	4.51	4.13	59.36	71.28	112.52	23.97	17.69	22	21.58	20.36	19.38	15.3	14.17	12.44	27.63	30.74	48.97	25.9	39.73	33.49	1.58	1.82	1.62	0.72	0.32	0.33	2.15	2.32	2.3	0.93	0.45	0.66	5.24	1.35	1.49	1.1	0	0	0	0	0.225396	1.28102	0.0140684
Tb927.5.2325	15.07	12.76	9.99	7.58	7.13	4.01	25.42	21.69	21.61	12.59	21.44	15.68	22.62	19.67	15.54	12.9	10.38	5.45	23.99	19.79	26.47	12.29	23.67	14.84	0.67	0.65	0.64	0.59	0.69	0.74	1.06	1.1	0.82	1.02	0.91	1.06	2.02	1.52	1.48	0.97	0	0	0	0	0.511339	0.00680113	0.976413
Tb927.11.13250	242	222.97	245.6	146.24	130.28	89.78	285.93	312.23	287.65	211.17	243.91	218.21	127.49	104.42	115.77	97.2	88.99	65.76	105.01	99.06	100.13	88.81	123.76	106.92	1.9	2.14	2.12	1.5	1.46	1.37	2.72	3.15	2.87	2.38	1.97	2.04	1.94	1.42	1.48	1.04	0	0	0	0	0.277726	0.0449767	0.0217994
Tb11.0370	7.8	6.06	6.72	1.44	0.82	0.97	14.09	17.28	15.24	4.11	4.81	2.59	4.27	4.98	5.59	1.96	1.12	1.32	9.74	10.21	11.38	3.15	4.81	2.73	1.83	1.22	1.2	0.73	0.73	0.73	1.45	1.69	1.34	1.3	1	0.95	6.37	1.05	1.48	1.41	0	0	0	0	0.970345	0.0996866	0.0628444
Tb927.9.10280	3.36	1.63	0.83	1	0.68	0.46	5.73	6.83	4.56	3.05	10.08	4.71	10.25	6.01	3.75	3.84	3.25	4.01	30.68	34.82	25.43	8.73	39.68	17.9	0.33	0.27	0.22	0.26	0.21	0.11	0.19	0.2	0.18	0.35	0.25	0.26	2.72	0.7	1.48	2.11	0	0	0	0	0.647069	0.188963	0.099776
Tb927.1.480	15.73	11.12	9.16	3.84	1.99	1.15	14.88	8.56	9.49	1.88	1.52	1.74	8.22	4.51	4.63	2.79	1.75	1.43	5.73	2.47	3.71	0.71	2.53	1.04	1.91	2.47	1.98	1.38	1.14	0.8	2.6	3.47	2.56	2.65	0.6	1.67	5.16	1.36	1.48	1.09	0	0	0	0	0.636904	0.501614	0.172452
Tb927.9.2490	96.45	92.82	86.93	22.58	8.98	9.75	118.68	124.9	128.38	31.73	27.01	21.57	12.91	16.32	15.71	13.73	17.03	16.74	15.22	17.24	23.58	16.65	22.2	23.27	7.47	5.69	5.53	1.64	0.53	0.58	7.8	7.24	5.44	1.91	1.22	0.93	6.69	1.1	1.48	1.35	0	0	0	0	0.924117	0.895922	0.018944
Tb927.6.2850	10.38	5.84	2.92	1.83	1.12	0.57	34.15	25.14	28.25	6.5	11.15	5.18	1.16	0.52	0.26	0.52	0.39	0.69	2.84	2.43	2.82	1.42	3.85	1.6	8.95	11.23	11.23	3.52	2.87	0.83	12.02	10.35	10.02	4.58	2.9	3.24	5.44	1.03	1.48	1.44	0	0	0	0	0.969174	3.17762	0.0104447
Tb927.4.390	24.36	24.18	22.74	18.74	12.47	7.8	16.68	16.54	12.57	10.97	11.76	6.17	11.62	12.37	12.18	11.03	9.32	7.45	5.6	5.35	5.82	4.21	6.59	3.82	2.1	1.95	1.87	1.7	1.34	1.05	2.98	3.09	2.16	2.61	1.78	1.62	1.83	1.39	1.47	1.06	0	0	0	0	0.647049	0.177158	0.168399
Tb927.3.3100	39.84	40.98	41.33	39.01	30.86	24.19	22.11	17.94	17.65	18.28	21.84	16.34	38.8	34.79	38.23	40.54	42.75	34.8	17.52	14.16	13.49	19.6	17.08	12.86	1.03	1.18	1.08	0.96	0.72	0.7	1.26	1.27	1.31	0.93	1.28	1.27	1.3	1.17	1.46	1.25	0	0	0	0	0.45723	0.0691733	0.4185
Tb927.10.12350	28.3	26.85	25.31	32.39	24.36	22.65	30.81	30.41	22.87	32.55	27.67	23.88	1.7	1.37	1.53	2.66	2.18	1.32	0.96	1.36	0.59	1.27	1.62	1.46	16.65	19.6	16.54	12.18	11.17	17.16	32.09	22.36	38.76	25.63	17.08	16.36	1.01	1.77	1.46	0.82	0	0	0	0	0.616683	0.181515	0.137622
Tb927.11.2690	54.33	45.36	32.95	14.82	22.17	24.77	116.71	131.81	121.45	52.7	69.78	64.06	109.77	91.79	63.23	61.59	72.88	75.9	208.93	189.76	201.42	95.56	228.91	152.93	0.49	0.49	0.52	0.24	0.3	0.33	0.56	0.69	0.6	0.55	0.3	0.42	2.15	1.23	1.46	1.19	0	0	0	0	0.577857	0.220568	0.108694
Tb927.7.6190	16.77	13.14	6.46	4.18	3.4	1.55	53.17	39.75	44.97	9.04	24.02	12.34	57.31	41.75	21.73	17.96	20.48	15.94	151.62	117.53	116.6	32.5	108.25	54.82	0.29	0.31	0.3	0.23	0.17	0.1	0.35	0.34	0.39	0.28	0.22	0.23	3.98	1.2	1.46	1.22	0	0	0	0	0.460998	0.356528	0.0194337
Tb927.6.1780	36.73	36.38	35.91	17.39	6.89	4.24	37.46	34.32	39.67	13.76	16.77	10.79	16.64	15.29	15.14	10.2	6.74	4.19	10.95	10.62	13.57	6.7	9.48	6.64	2.21	2.38	2.37	1.7	1.02	1.01	3.42	3.23	2.92	2.05	1.77	1.63	3.82	1.38	1.46	1.06	0	0	0	0	0.364639	0.634535	0.0124206
Tb927.11.1020	240.84	264.38	242.24	132.77	72.35	52.51	219.8	242.56	218.77	121.25	124.92	96.79	251.92	273.01	244.07	224.91	199.81	176.69	182.09	190.79	188.11	180.56	201.39	181.57	0.96	0.97	0.99	0.59	0.36	0.3	1.21	1.27	1.16	0.67	0.62	0.53	2.9	1.25	1.46	1.17	0	0	0	0	0.32149	3.49446	0.00974754
Tb927.4.230	40.88	33.59	36.05	18.05	11.21	7.17	27.46	19.75	20.98	8.17	14.19	5.98	16.48	12.5	11.3	5.71	3.45	2.98	8.03	5.51	6.01	1.88	3.6	1.32	2.48	2.69	3.19	3.16	3.25	2.41	3.42	3.58	3.49	4.35	3.94	4.53	3.03	1.25	1.45	1.16	0	0	0	0	0.541501	0.0234022	0.0492093
Tb927.11.12410	14.61	12.8	10.95	2.96	1.31	0.34	50.16	48.35	59.21	14.57	13.94	12.76	14.82	10.22	7.29	7.5	8.35	12.84	89.08	88.6	76.63	36.3	81.64	46.91	0.99	1.25	1.5	0.39	0.16	0.03	0.56	0.55	0.77	0.4	0.17	0.27	8.32	0.5	1.45	2.9	0	0	0	1	0.434221	0.742913	0.0338126
Tb927.11.5080	4.15	3.87	5.02	1.18	0.63	0.52	6.73	10.86	8.08	2.08	2.13	1.22	9.96	10.44	8.9	7.76	5.48	7.62	16.85	23.21	20.65	9.9	13.84	10.55	0.42	0.37	0.56	0.15	0.11	0.07	0.4	0.47	0.39	0.21	0.15	0.12	5.6	0.93	1.45	1.56	0	0	0	0	0.946306	1.35807	0.0123178
Tb927.6.5100	80.1	73.54	78.85	55.79	29.89	34.4	101.16	111.03	103.62	78.14	44.55	60.48	31.87	32.17	29.72	39.53	38.04	43.8	27.63	26.83	29.25	41.74	36.08	48.37	2.51	2.29	2.65	1.41	0.79	0.79	3.66	4.14	3.54	1.87	1.23	1.25	1.94	1.52	1.45	0.95	0	0	0	0	0.277488	1.76049	0.0107405
Tb927.10.13840	40.88	41.36	40.63	25.67	16.89	11.06	70.69	77	71.07	52.7	35.68	38.15	26.35	25.34	26.18	25.37	22.95	19.84	37.29	38.52	36.41	41.03	35.12	37.3	1.55	1.63	1.55	1.01	0.74	0.56	1.9	2	1.95	1.28	1.02	1.02	2.29	1.24	1.44	1.16	0	0	0	0	0.106496	0.303712	0.0164922
Tb927.8.7870	16.35	13.7	14.05	6.02	1.99	3.67	15.26	12.63	19.28	4.52	4.61	2.68	3.65	3.95	3.93	2.96	1.8	2.69	3.93	2.88	6.27	1.37	2.43	2.07	4.48	3.47	3.58	2.03	1.11	1.36	3.88	4.39	3.07	3.3	1.9	1.29	3.78	0.98	1.44	1.47	0	0	0	0	0.988834	0.435375	0.106847
Tb927.10.5390	89.31	81.83	86.71	49.08	39.5	41.85	81.81	89.18	107.33	62.61	42.57	55.86	13.32	14.99	16.36	10.16	14.56	18.75	7.69	9.05	13.46	10.26	10.95	13.56	6.7	5.46	5.3	4.83	2.71	2.23	10.64	9.85	7.97	6.1	3.89	4.12	1.98	1.63	1.44	0.88	0	0	0	0	0.391212	0.470834	0.0210418
Tb927.10.14030	175.89	168.16	174.77	77.5	53.18	25.34	217.38	213.13	186.15	61.69	107.84	40.79	5.4	6.01	5.28	3.31	5.05	2.75	5.81	5.02	3.89	2.49	6.23	2.03	32.57	27.98	33.1	23.41	10.53	9.21	37.41	42.46	47.85	24.78	17.31	20.09	3.33	1.36	1.44	1.06	0	0	0	0	0.458379	0.868049	0.0162289
Tb927.4.2050	38.43	39.69	36.09	36.26	35.95	31.13	37.83	37.37	47.19	38.74	54.99	48.32	20.13	20.88	17.76	22.14	27.56	26.03	14.34	14.4	18.61	19.04	28.48	23.93	1.91	1.9	2.03	1.64	1.3	1.2	2.64	2.6	2.54	2.03	1.93	2.02	1.11	1.33	1.44	1.08	0	0	0	0	0.0987976	2.11093	0.00902887
Tb927.1.4370	82.92	76.11	75.89	54.22	45.37	47.98	89.21	90	100.95	70.53	55.8	68.48	20.25	17.18	17.06	18.96	14.94	19.95	14.84	15.97	19.98	16.35	15.86	16.81	4.09	4.43	4.45	2.86	3.04	2.41	6.01	5.64	5.05	4.31	3.52	4.07	1.59	1.29	1.43	1.11	0	0	0	0	0.42343	0.0317	0.0225169
Tb927.9.6530	71.34	57.3	65.5	30.6	11.79	9.23	105.09	113.54	131.83	73.01	58.08	64.67	21.58	21.43	19.9	17.17	13.34	12.78	47.82	54.49	44.6	36.56	54.73	36.22	3.31	2.67	3.29	1.78	0.88	0.72	2.2	2.08	2.96	2	1.06	1.79	3.76	0.78	1.43	1.83	0	0	0	0	0.671781	0.357502	0.126299
Tb927.7.5970	161.28	132.38	127.56	60.85	17.23	11.41	111.7	84.28	118.97	38.94	27.82	18.04	115.17	93.9	93.17	80.72	43.04	30.56	73.16	56.38	89.83	37.83	45.66	34.01	1.4	1.41	1.37	0.75	0.4	0.37	1.53	1.49	1.32	1.03	0.61	0.53	4.71	1.04	1.43	1.38	0	0	0	0	0.902939	0.449267	0.0387496
Tb927.10.5510	26.4	21.82	21.03	11.73	4.03	4.47	55.14	53.33	51.12	29.5	20.93	21.29	4.36	3.61	3.45	2.57	1.02	0.92	5.31	5.43	4.37	3.71	3.85	3.82	6.06	6.04	6.1	4.56	3.95	4.86	10.38	9.82	11.7	7.95	5.44	5.57	3.42	1.75	1.42	0.81	0	0	0	0	0.350583	0.224679	0.0253704
Tb927.7.1530	55.03	56.74	53.94	52.96	48.62	54.63	58.32	61.24	58.28	61.44	53.11	60.24	7.26	7.43	7.46	10.59	12.18	18.86	5.52	5.76	5.12	8.99	10.29	12.43	7.58	7.64	7.23	5	3.99	2.9	10.57	10.63	11.38	6.83	5.16	4.85	1.06	1.45	1.42	0.98	0	0	0	0	0.143862	0.349202	0.01691
Tb927.5.4350	17.8	24.7	21.69	8.33	5.39	3.27	50.37	69.51	62.13	17.72	27.77	12.72	31.71	48.75	42.81	25.67	24.46	21.33	69.64	101.15	91.13	43.72	93.86	47.48	0.56	0.51	0.51	0.32	0.22	0.15	0.72	0.69	0.68	0.41	0.3	0.27	3.78	1.32	1.42	1.08	0	0	0	0	0.146184	0.463258	0.0191789
Tb927.7.6590	12.24	5.88	2.09	0.7	0.49	0.29	4.43	0.95	1.78	0.1	0.61	0.33	1.78	0.9	0.52	0.87	0.73	1.03	0.59	0.16	0.15	0.2	0.51	0.42	6.88	6.53	4.02	0.8	0.67	0.28	7.51	5.94	11.87	0.5	1.2	0.79	13.66	1.45	1.42	0.98	0	0	0	0	0.820719	0.473599	0.0585006
Tb927.11.5350	16.1	13.87	15.06	2.18	0.87	0.4	20.23	20.62	23.84	2.49	3.55	1.79	26.6	22.55	22.12	7.06	4.76	3.61	27.8	26.26	32.92	7.41	13.89	7.21	0.61	0.62	0.68	0.31	0.18	0.11	0.73	0.79	0.72	0.34	0.26	0.25	13.05	1.17	1.42	1.21	0	0	0	0	0.384414	9.12759	0.00944184
Tb927.9.5040	89.11	83.41	83.48	25.24	6.36	6.42	97.48	102.64	128.27	29.91	15.81	13.33	142.93	145.05	131.22	148.72	143.92	119.42	145.98	142.92	169.13	153.04	204.13	151.71	0.62	0.58	0.64	0.17	0.04	0.05	0.67	0.72	0.76	0.2	0.08	0.09	6.73	1.17	1.42	1.21	0	0	0	0	0.448661	12.237	0.00997888
Tb927.2.1200	62.09	47.29	54.24	21.23	12.47	8.08	43.27	27.78	28.66	8.33	15.76	6.17	81.01	43.55	34.39	14.21	6.74	7.62	37.08	15.06	20.8	3.76	6.79	3.72	0.77	1.09	1.58	1.49	1.85	1.06	1.17	1.84	1.38	2.22	2.32	1.66	3.92	1.28	1.41	1.1	0	0	0	0	0.851488	0.13679	0.113141
Tb927.5.290	10.83	8.12	7.24	2.88	2.33	0.75	14.76	15.6	12.16	6.6	9.93	4.19	17.18	15.42	11.7	7.5	6.02	4.19	23.12	23.05	20.43	11.53	26.05	10.79	0.63	0.53	0.62	0.38	0.39	0.18	0.64	0.68	0.6	0.57	0.38	0.39	4.39	1.08	1.41	1.31	0	0	0	0	0.826686	0.264791	0.0848298
Tb927.11.5040	24.28	22.64	22.56	7.8	2.18	1.95	26.96	33.05	31.73	6.55	5.22	4.57	4.15	3.44	3.67	2.14	1.02	0.92	3.8	6.38	6.27	1.27	2.18	1.27	5.85	6.58	6.15	3.64	2.14	2.12	7.09	5.18	5.06	5.16	2.39	3.6	5.82	0.93	1.41	1.52	0	0	0	0	0.933871	0.359103	0.132321
Tb927.9.7520	56.53	37.07	20.55	33.48	52.74	53.55	85.07	48.15	45.97	65.2	136.78	134.85	21.25	13.57	7.29	5.4	4.08	8.77	33.78	19.51	15.94	4.57	14.29	11.59	2.66	2.73	2.82	6.2	12.93	6.11	2.52	2.47	2.88	14.27	9.57	11.64	0.82	0.96	1.41	1.47	0	0	0	0	0.897842	0.411137	0.0300128
Tb927.5.2730	12.66	12.16	11.91	6.1	2.86	1.32	16.68	18.35	16.65	7.06	10.74	4.38	8.67	8.76	7.42	6.36	5.48	5.45	10.03	10.86	9.56	7.31	13.38	6.74	1.46	1.39	1.61	0.96	0.52	0.24	1.66	1.69	1.74	0.97	0.8	0.65	3.57	1.14	1.41	1.24	0	0	0	0	0.540871	0.939104	0.0183041
Tb927.3.5660	16.56	12.37	9.95	2.14	0.44	0.17	7.52	4.07	6.38	0.41	0.51	0.24	11.33	7.77	6.46	2.96	2.28	1.43	4.01	2.88	3.71	0.46	1.47	1.13	1.46	1.59	1.54	0.72	0.19	0.12	1.88	1.41	1.72	0.89	0.35	0.21	14.14	1.09	1.41	1.29	0	0	0	0	0.869505	1.15895	0.0223412
Tb927.11.14220	10.13	7.56	4.71	1.13	0.68	0.8	18.23	19.26	16.61	2.08	3.09	3.01	12.66	10.39	4.54	4.05	3.69	4.64	21.53	20.7	17.31	5.18	16.57	9.94	0.8	0.73	1.04	0.28	0.18	0.17	0.85	0.93	0.96	0.4	0.19	0.3	8.58	1.07	1.41	1.32	0	0	0	0	0.939978	1.49593	0.0133037
Tb927.10.14420	31.54	37.33	31.59	8.85	2.81	2.41	41.18	50.7	91.5	9.34	7.45	7.87	25.07	28.01	24.04	18.66	19.99	24.77	29.64	33.17	51.75	19.6	31.72	27.55	1.26	1.33	1.31	0.47	0.14	0.1	1.39	1.53	1.77	0.48	0.23	0.29	7.14	1.2	1.41	1.18	0	0	0	0	0.682435	4.23047	0.0111282
Tb927.10.15310	8.55	6.83	3.84	6.71	9.41	5.62	55.93	47.98	59.21	20.67	33.19	28.26	51.38	52.19	43.16	30.12	29.6	24.25	118.85	120.04	119.26	54.48	107.94	73.19	0.17	0.13	0.09	0.22	0.32	0.23	0.47	0.4	0.5	0.38	0.31	0.39	0.88	3.51	1.4	0.4	1	0	0	0	0.138685	0.0765961	0.0796926
Tb927.2.1140	17.14	16.15	15.01	4.05	5.19	8.14	14.59	11.15	16.24	3.76	6.23	7.63	2.16	1.42	1.4	1.09	1.07	2.81	1.88	1.48	1.89	0.56	1.17	1.88	7.94	11.37	10.72	3.72	4.85	2.9	7.76	7.53	8.59	6.71	5.32	4.06	2.78	0.8	1.4	1.75	0	0	0	0	0.745192	0.218724	0.0707768
Tb927.9.13240	20.67	22.46	19.9	19.13	14.94	11.12	33.15	37.12	29.03	30.62	29.39	23.17	46.61	48.79	50.01	60.94	67.59	59.74	58.61	70.78	60.5	85.3	81.69	80.92	0.44	0.46	0.4	0.31	0.22	0.19	0.57	0.52	0.48	0.36	0.36	0.29	1.39	1.21	1.4	1.16	0	0	0	0	0.48793	0.271035	0.0168116
Tb927.6.4760	55.32	57.3	56.99	30.55	16.55	14.85	81.85	97.9	92.09	76.72	51.59	75.88	5.64	6.53	6.15	4.53	3.64	3.44	4.93	6.26	6.23	7.46	9.83	12.01	9.81	8.77	9.27	6.74	4.55	4.32	16.6	15.64	14.78	10.28	5.25	6.32	2.74	1.69	1.4	0.83	0	0	0	0	0.143432	0.447669	0.0318167
Tb927.10.5140	11.79	9.58	10.17	2.05	1.6	1.72	12.08	14.61	18.02	2.74	4.26	3.53	29.38	23.97	25.35	19.35	17.18	11.58	29.93	31.48	36.52	20.01	25.44	19.69	0.4	0.4	0.4	0.11	0.09	0.15	0.4	0.46	0.49	0.14	0.17	0.18	5.87	1.13	1.4	1.24	0	0	0	0	0.758245	0.472672	0.0136607
Tb927.1.1930	33.91	29.21	21.78	5.1	1.8	1.43	31.1	35.27	64.88	7.26	4.76	5.84	130.44	76.03	29.67	36.7	31.64	31.24	166.29	67.37	84.71	36.51	90.46	60.1	0.26	0.38	0.73	0.14	0.06	0.05	0.19	0.52	0.77	0.2	0.05	0.1	10.19	1.08	1.4	1.3	0	0	0	0	0.986151	0.612186	0.158937
Tb927.9.11820	50.76	54.03	54.55	30.55	15.72	10.15	52.88	52.8	51.53	25.03	21.99	17.76	32.25	30.63	34.47	27.72	23.63	20.64	23.66	23.62	26.17	18.38	24.02	20.11	1.57	1.76	1.58	1.1	0.67	0.49	2.23	2.24	1.97	1.36	0.92	0.88	2.82	1.31	1.4	1.07	0	0	0	0	0.315022	0.694474	0.017952
Tb927.11.14770	32.95	37.93	31.42	26.37	14.31	11.52	51.38	50.91	40.67	40.52	35.07	24.4	25.65	30.71	26.49	23.89	22.22	22.93	24.12	29.3	21.02	31.84	35.27	27.93	1.28	1.24	1.19	1.1	0.64	0.5	2.13	1.74	1.93	1.27	0.99	0.87	1.96	1.56	1.4	0.9	0	0	0	0	0.374267	0.73822	0.0162399
Tb07.30D13.60	21.04	18	18.55	15.82	9.32	7.74	21.61	15.6	22.91	12.8	11.86	9.8	11.37	6.53	6.98	9.63	5.29	5.62	7.52	4.65	9.12	5.94	4.92	4.66	1.85	2.76	2.66	1.64	1.76	1.38	2.87	3.35	2.51	2.15	2.41	2.1	1.75	1.2	1.39	1.16	0	0	0	0	0.812253	0.0155837	0.100974
Tb927.5.2000	14.98	11.77	6.89	5.23	7.08	6.76	37.83	46.71	45.27	18.99	39.73	34.95	14.15	10.95	6.2	3.88	4.42	7.91	31.31	34.86	33	9.65	30.15	17.38	1.06	1.07	1.11	1.35	1.6	0.85	1.21	1.34	1.37	1.97	1.32	2.01	1.76	1.21	1.39	1.15	0	0	0	0	0.43439	0.200127	0.183377
Tb927.2.1110	47.06	40.03	39.01	18.35	11.21	6.65	36.29	24.32	25.1	8.28	13.73	5.23	12.78	7.99	8.42	4.66	3.06	2.87	6.19	3.33	4.08	1.32	2.99	1.79	3.68	5.01	4.63	3.94	3.66	2.32	5.86	7.3	6.15	6.27	4.59	2.92	3.48	1.45	1.39	0.96	0	0	0	0	0.413169	0.344707	0.200823
Tb927.7.3650	15.11	15.98	15.67	8.11	4.85	4.24	34.4	42.8	49.12	14.93	16.12	12.95	7.68	9.11	7.55	9.72	7.42	6.42	15.43	18.15	23.47	11.32	18.85	16.3	1.97	1.75	2.08	0.83	0.65	0.66	2.23	2.36	2.09	1.32	0.86	0.79	2.72	1.15	1.39	1.21	0	0	0	0	0.571571	0.543062	0.0185334
Tb927.5.2410	39.14	35.22	31.16	8.89	4.46	2.18	29.05	33.83	48.12	6.85	6.39	4.8	14.11	15.46	12.39	12.03	11.55	11.7	9.99	9.55	15.53	7.72	13.94	10.03	2.77	2.28	2.51	0.74	0.39	0.19	2.91	3.54	3.1	0.89	0.46	0.48	6.79	1.26	1.39	1.1	0	0	0	0	0.481095	8.43842	0.0102174
Tb927.11.1720	62.83	48.84	57.86	38.92	17.47	11.87	61.95	57.28	59.13	32.34	43.94	28.02	47.81	39.77	48.09	32.34	20.91	18.52	40.97	36.09	41.08	25.69	30.91	27.79	1.31	1.23	1.2	1.2	0.84	0.64	1.51	1.59	1.44	1.26	1.42	1.01	2.48	1.21	1.38	1.14	0	0	0	0	0.301514	0.194862	0.140283
Tb927.11.10810	18.22	14.35	11.08	6.49	5.73	5.96	29.14	37.78	41.97	12.24	15.81	15.4	20.42	17.91	16.89	9.68	9.56	8.03	27.8	32.18	39.71	10	22.96	17.62	0.89	0.8	0.66	0.67	0.6	0.74	1.05	1.17	1.06	1.22	0.69	0.87	2.4	1.4	1.38	0.99	0	0	0	0	0.390345	0.243966	0.40947
Tb927.9.2940	50.01	54.64	51.93	30.03	16.01	18.23	84.36	103.05	110.85	68.95	43.53	58.36	29.84	34.45	32.12	28.72	23	28.49	41.55	49.59	51.75	52.25	46.83	56.28	1.68	1.59	1.62	1.05	0.7	0.64	2.03	2.08	2.14	1.32	0.93	1.04	2.44	1.28	1.38	1.08	0	0	0	0	0.0959877	0.327723	0.0197048
Tb927.11.14165	7.84	5.33	1.83	2.05	4.85	7.8	21.53	25.31	15.83	15.13	26.66	23.5	100.02	60.18	25.14	25.59	21.79	23.73	202.58	121.07	116.45	45.95	114.73	75.03	0.08	0.09	0.07	0.08	0.22	0.33	0.11	0.21	0.14	0.33	0.23	0.31	1.02	1.92	1.38	0.72	0	0	0	0	0.670827	0.507003	0.0422584
Tb927.7.2550	69.81	74.57	72.44	38.23	23.15	13.99	81.22	73.75	92.5	42.09	27.01	30.38	80.89	82.38	79.6	84.95	94.57	73.5	62.5	56.63	73.22	78.65	90.11	82.9	0.86	0.91	0.91	0.45	0.24	0.19	1.3	1.3	1.26	0.54	0.3	0.37	2.88	1.44	1.38	0.96	0	0	0	0	0.0459826	1.11329	0.0158542
Tb09.v4.0059	13.07	9.92	8.03	2.35	0.73	0.46	14.21	14.77	16.31	0.81	2.89	0.85	31.67	32.64	28.67	17.91	14.61	13.93	29.01	28.52	30.18	8.48	23.92	11.45	0.41	0.3	0.28	0.13	0.05	0.03	0.49	0.52	0.54	0.1	0.12	0.07	8.76	1.57	1.38	0.88	0	0	0	0	0.428025	359.357	0.0247801
Tb927.7.6100	26.85	22.68	23.26	15.91	11.26	7.8	33.36	29.96	35.07	24.78	24.02	25.06	50.8	40.38	43.29	34.83	24.41	18.17	54.85	44.77	51.12	38.28	41.91	39.85	0.53	0.56	0.54	0.46	0.46	0.43	0.61	0.67	0.69	0.65	0.57	0.63	2.08	1.21	1.37	1.13	0	0	0	0	0.423877	0.0113405	0.318213
Tb927.11.8310	70.18	59.62	55.25	33.65	16.69	8.37	136.4	120.87	121.53	41.43	73.13	32.5	53.95	46.99	42.02	32.43	20.62	12.5	68.77	61.48	60.43	30.92	69.38	30.57	1.3	1.27	1.31	1.04	0.81	0.67	1.98	1.97	2.01	1.34	1.05	1.06	3.15	1.54	1.37	0.89	0	0	0	0	0.0110655	0.182661	0.0216593
Tb927.10.15960	16.43	19.46	17.11	10.55	9.36	6.65	25.58	30.33	26.95	18.28	18.5	12.72	9.96	12.37	10.69	9.55	10.97	8.89	14.97	15.68	14.42	12.14	15.56	12.67	1.65	1.57	1.6	1.1	0.85	0.75	1.71	1.93	1.87	1.51	1.19	1	2	1.14	1.37	1.2	0	0	0	0	0.514151	0.185574	0.0491855
Tb927.10.15040	2.41	2.28	1.75	2.18	3.2	3.38	17.72	16.54	19.06	6.8	10.95	11.21	50.51	42.22	35.3	39.93	31.3	21.96	104.01	86.38	84.9	62.55	109.46	56.66	0.05	0.05	0.05	0.05	0.1	0.15	0.17	0.19	0.22	0.11	0.1	0.2	0.74	3.87	1.37	0.35	1	0	0	0	0.308844	0.470293	0.223441
Tb927.7.6440	27.1	29.47	29.41	20.66	18.68	15.25	35.87	59.26	34.22	19.65	43.53	19.26	81.39	80.36	82.43	92.97	84.53	82.27	84.36	95.85	79.67	101.85	96.69	86.52	0.33	0.37	0.36	0.22	0.22	0.19	0.43	0.62	0.43	0.19	0.45	0.22	1.58	1.4	1.37	0.98	0	0	0	0	0.711826	0.492418	0.133246
Tb927.10.10090	159.37	115.63	130.13	147.46	83.8	102.96	305.5	161.48	172.09	391.93	124.82	138.28	14.77	10.18	13.18	19.09	20.91	26.66	21.28	13.54	14.27	32.29	26.71	30.52	10.79	11.36	9.87	7.72	4.01	3.86	14.36	11.93	12.06	12.14	4.67	4.53	1.21	1.2	1.37	1.14	0	0	0	0	0.613842	0.591182	0.155195
Tb927.7.7000	14.82	16.84	12.74	2.35	1.75	0.86	33.82	36.75	57.65	5.89	7.4	4.43	4.32	3.69	3.4	1.57	1.5	2.01	7.48	8.44	14.12	2.69	6.79	4.57	3.43	4.56	3.75	1.5	1.17	0.43	4.52	4.35	4.08	2.19	1.09	0.97	8.95	1.1	1.37	1.25	0	0	0	0	0.849626	0.926532	0.0211369
Tb927.11.5820	96.78	103.52	98.36	64.99	55.75	38.87	103.59	98.07	93.57	85.76	83.57	82.33	33.7	40.25	40.63	26.33	23.68	15.36	27.84	23.54	26.17	24.32	25.8	25.72	2.87	2.57	2.42	2.47	2.35	2.53	3.72	4.17	3.58	3.53	3.24	3.2	1.87	1.46	1.36	0.93	0	0	0	0	0.274529	0.00574144	0.0986791
Tb927.6.1710	15.98	15.98	14.1	9.68	3.69	3.5	19.9	25.43	20.24	15.79	16.72	9.51	28.93	28.43	30.11	20.22	12.13	9.23	33.94	38.11	31.92	29.25	30.46	19.41	0.55	0.56	0.47	0.48	0.3	0.38	0.59	0.67	0.63	0.54	0.55	0.49	2.73	1.2	1.36	1.13	0	0	0	0	0.481832	0.138301	0.0367345
Tb927.7.4400	34.36	34.62	32.82	14.34	5.77	5.16	36.83	36.79	46.49	17.87	7.15	9.66	44.16	45.1	41.98	42.28	51.05	63.69	40.42	46.46	55.72	46.26	44.14	58.31	0.78	0.77	0.78	0.34	0.11	0.08	0.91	0.79	0.83	0.39	0.16	0.17	4.03	1.09	1.36	1.25	0	0	0	0	0.756877	1.6085	0.0171932
Tb927.9.2140	55.94	50.51	49.62	38.53	23.78	28.61	64.84	69.59	86.86	61.44	40.44	57.98	24.65	24.23	24.48	33.87	42.55	53.55	28.05	28.48	31.03	47.22	52.76	59.63	2.27	2.08	2.03	1.14	0.56	0.53	2.31	2.44	2.8	1.3	0.77	0.97	1.72	1.18	1.36	1.15	0	0	0	0	0.61741	2.00772	0.0124221
Tb09.v4.0146	21.79	19.5	15.67	4.23	1.16	0.75	23.87	23.42	26.32	1.52	3.34	1.55	10.21	10.65	9.21	5.01	3.45	2.52	10.79	11.48	14.57	2.08	4.41	2.97	2.13	1.83	1.7	0.84	0.34	0.3	2.21	2.04	1.81	0.73	0.76	0.52	9.28	1.07	1.36	1.27	0	0	0	0	0.898157	3.6454	0.0108012
Tb927.1.1750	20.05	16.11	14.27	5.62	1.26	0.97	19.98	21.48	21.8	3.25	4.05	2.4	0.71	0.64	0.61	0.22	0.15	0.17	0.67	0.95	1.08	0.2	0.2	0.14	28.24	25.17	23.39	25.55	8.4	5.71	29.82	22.61	20.19	16.25	20.25	17.14	6.42	0.95	1.35	1.42	0	0	0	0	0.953994	0.577365	0.159904
Tb927.11.520	33.33	33.8	31.46	20.79	9.27	6.02	38.33	39.88	37.3	22.7	20.27	14.7	11.91	9.92	9.86	9.41	6.55	7.68	11.75	10.45	11.49	9.14	12.47	7.91	2.8	3.41	3.19	2.21	1.42	0.78	3.26	3.82	3.25	2.48	1.63	1.86	2.73	1.1	1.35	1.23	0	0	0	0	0.824786	0.648707	0.0221387
Tb927.7.4090	49.76	48.19	51.06	22.36	9.03	11.18	56.6	64.61	95.54	28.03	14.6	22.04	37.97	33.93	33.12	34.22	34.01	47.35	33.57	39.05	59.98	40.37	35.12	47.99	1.31	1.42	1.54	0.65	0.27	0.24	1.69	1.65	1.59	0.69	0.42	0.46	3.5	1.15	1.35	1.17	0	0	0	0	0.521684	2.20668	0.0133262
Tb927.2.1890	35.32	32.9	18.98	19.13	21.06	11.7	49.62	42.59	21.84	28.03	50.07	23.17	22.37	12.2	6.98	7.5	7.23	5.22	20.94	11.77	7.75	8.33	14.19	6.78	1.58	2.7	2.72	2.55	2.91	2.24	2.37	3.62	2.82	3.36	3.53	3.42	1.68	1.26	1.34	1.06	0	0	0	0	0.833703	0.0407663	0.317771
Tb927.2.2670	30.3	29.12	27.84	16.17	16.4	16.11	30.47	26.67	22.02	14.32	23.41	18.84	129.53	101.88	102.46	81.25	73.46	72.41	100.12	72.06	76.63	57.88	80.98	59.63	0.23	0.29	0.27	0.2	0.22	0.22	0.3	0.37	0.29	0.25	0.29	0.32	1.79	1.22	1.34	1.1	0	0	0	0	0.704895	0.0588978	0.375743
Tb927.9.14100	42.54	43.17	39.19	15.39	7.72	5.22	53.26	60.21	52.35	20.72	23.51	14.37	16.81	17.48	16.8	6.97	5.77	2.87	16.26	19.38	20.76	7.01	10.08	7.54	2.53	2.47	2.33	2.21	1.34	1.82	3.28	3.11	2.52	2.96	2.33	1.91	4.41	1.22	1.34	1.1	0	0	0	0	0.693742	0.212777	0.228725
Tb927.11.16650	37.06	43.6	40.37	20.97	14.46	14.68	48.37	66.3	67.7	37.57	28.89	33.39	23.45	29.72	28.15	26.02	25.04	27.8	36.79	44.07	52.13	35.8	40.9	40.79	1.58	1.47	1.43	0.81	0.58	0.53	1.31	1.5	1.3	1.05	0.71	0.82	2.42	0.92	1.34	1.46	0	0	0	0	0.760346	0.264846	0.027421
Tb927.3.5260	37.73	41.41	44.29	19.66	12.42	8.48	47.66	52.63	44.19	20.31	23.36	14.65	9.34	10.61	12.18	7.37	7.42	6.65	8.99	10.33	12.2	6.8	9.12	7.44	4.04	3.9	3.64	2.67	1.67	1.28	5.3	5.09	3.62	2.99	2.56	1.97	3.04	1.21	1.34	1.11	0	0	0	0	0.810159	0.367763	0.0445093
Tb927.5.2620	21.17	17.22	5.8	5.1	4.32	3.21	68.01	42.02	32.25	12.19	26.1	17.94	20.83	16.19	5.41	7.93	9.12	10.38	51.38	34.53	31.1	14.62	55.8	29.91	1.02	1.06	1.07	0.64	0.47	0.31	1.32	1.22	1.04	0.83	0.47	0.6	3.5	1.14	1.34	1.18	0	0	0	0	0.777894	0.525622	0.0251874
Tb927.10.410	15.4	16.32	16.63	6.06	3.25	2.06	16.09	22.3	26.36	7.01	5.78	5.18	11.45	11.9	11.52	11.64	10.53	8.03	13.63	16.46	19.09	10.71	15.96	11.63	1.34	1.37	1.44	0.52	0.31	0.26	1.18	1.35	1.38	0.65	0.36	0.45	4.25	0.94	1.34	1.43	0	0	0	0	0.842534	1.99838	0.0124455
Tb927.9.5300	32.79	35.61	36.96	26.85	19.55	22.53	37.58	44.53	35.41	34.48	23.31	25.62	25.9	27.75	30.59	29.47	24.31	33.82	23.41	25.64	23.99	32.24	20.37	26.71	1.27	1.28	1.21	0.91	0.8	0.67	1.61	1.74	1.48	1.07	1.14	0.96	1.53	1.28	1.33	1.04	0	0	0	0	0.426406	0.126861	0.0160312
Tb05.5K5.30	30.46	24.35	14.71	6.02	7.52	8.77	41.55	45.39	41.89	9.9	29.39	21.43	53.16	39.56	20.73	18.05	19.65	26.77	70.65	68.64	60.54	17.72	77.13	48.89	0.57	0.62	0.71	0.33	0.38	0.33	0.59	0.66	0.69	0.56	0.38	0.44	3.12	1.02	1.33	1.3	0	0	0	0	0.974176	0.186847	0.0609211
Tb927.8.6830	81.51	83.07	77.15	47.64	27.75	26.83	81.52	92.39	136.39	64.74	32.33	51.67	40.51	40.98	34.87	45.42	52.79	64.15	35.66	36.91	52.46	55.19	48.5	64.15	2.01	2.03	2.21	1.05	0.53	0.42	2.29	2.5	2.6	1.17	0.67	0.81	2.36	1.18	1.33	1.13	0	0	0	0	0.427136	2.73375	0.0120441
Tb927.11.8440	10.96	6.74	6.63	1.74	1.21	1.2	7.61	6.83	7.97	1.22	1.22	1.93	3.03	1.89	1.48	1.18	0.87	2.01	2.09	1.85	2.37	0.76	0.91	1.18	3.62	3.57	4.48	1.47	1.39	0.6	3.64	3.69	3.36	1.61	1.34	1.64	5.86	0.92	1.33	1.45	0	0	0	0	0.863647	22.153	0.00981306
Tb927.2.830	35.32	28.13	32.07	5.62	3.64	4.64	25	23.13	28.62	2.44	3.9	3.91	1.45	1.5	1.7	0.52	0.29	0.4	1.21	1.07	1.3	0.1	0.51	0.28	24.36	18.75	18.86	10.81	12.55	11.6	20.66	21.62	22.02	24.4	7.65	13.96	6.87	1.04	1.32	1.27	0	0	0	0	0.961987	0.550815	0.351363
Tb927.4.4940	22.62	16.32	11.74	2.83	2.67	2.18	49.08	49.71	53.98	9.8	14.34	11.45	27.85	21	14.71	7.28	7.33	10.61	42.47	38.07	40.78	18.79	38.31	30	0.81	0.78	0.8	0.39	0.36	0.21	1.16	1.31	1.32	0.52	0.37	0.38	6.6	1.59	1.32	0.83	0	0	0	0	0.309772	7.58657	0.00958835
Tb927.8.3380	58.31	56.91	50.32	28.68	22.81	20.7	80.81	80	58.46	29.04	65.02	31.79	89.23	85.35	69.87	46.07	40.86	28.44	83.31	83.54	73.7	35.8	80.02	36.31	0.65	0.67	0.72	0.62	0.56	0.73	0.97	0.96	0.79	0.81	0.81	0.88	2.29	1.33	1.31	0.98	0	0	0	0	0.472126	0.0424261	0.351815
Tb927.9.7920	17.35	16.37	15.54	5.06	2.77	1.72	16.55	10.58	12.83	2.64	4.05	2.59	40.42	37.11	37.18	20.05	12.32	8.14	32.36	23.75	28.03	6.7	19.16	8.81	0.43	0.44	0.42	0.25	0.22	0.21	0.51	0.45	0.46	0.39	0.21	0.29	5.16	1.1	1.31	1.19	0	0	0	0	0.680464	0.359924	0.073893
Tb927.6.2420	158.95	165.63	169.58	91.8	54.01	34.97	169.76	164.37	148.22	77.23	94.41	56.85	63.91	67.52	66.46	44.76	45.22	31.42	53.17	54.49	56.65	36.35	45.31	37.68	2.49	2.45	2.55	2.05	1.19	1.11	3.19	3.02	2.62	2.12	2.08	1.51	2.73	1.18	1.31	1.11	0	0	0	0	0.648109	0.449973	0.0263911
Tb927.5.3350	64.37	117.61	112.98	21.66	25.18	10.66	90.21	144.78	141.99	19.85	66.19	33.3	66.9	118.16	106.3	33.39	57.64	32.56	76.62	132.06	138.21	24.42	129.13	61.98	0.96	1	1.06	0.65	0.44	0.33	1.18	1.1	1.03	0.81	0.51	0.54	5.13	1.1	1.31	1.19	0	0	0	0	0.704175	0.47825	0.0320048
Tb927.10.2610	41.09	42.39	35.57	23.54	12.13	9.98	47.74	51.32	57.46	30.26	21.49	21.1	58.68	64.69	53.33	54.79	47.02	38.7	55.93	59.84	70.33	55.24	61.83	62.5	0.7	0.66	0.67	0.43	0.26	0.26	0.85	0.86	0.82	0.55	0.35	0.34	2.61	1.25	1.31	1.05	0	0	0	0	0.107191	0.490846	0.0313181
Tb927.9.6310	89.31	84.23	90.86	24.37	13.97	15.48	94.73	106.96	143.03	31.53	22.96	35.04	58.77	53.13	54.29	35.61	27.56	34.46	53.42	56.83	79.04	39.25	38.62	45.92	1.52	1.59	1.67	0.68	0.51	0.45	1.77	1.88	1.81	0.8	0.59	0.76	4.91	1.14	1.31	1.15	0	0	0	0	0.362666	2.25518	0.0104091
Tb927.6.1550	38.39	30.54	36.18	10.68	3.83	2.52	25.71	22.22	28.55	5.23	7.25	4.33	48.72	36.85	40.19	19.44	9.8	5.45	30.81	25.47	34.63	7.72	13.13	7.35	0.79	0.83	0.9	0.55	0.39	0.46	0.83	0.87	0.82	0.68	0.55	0.59	6.17	1	1.3	1.3	0	0	0	0	1.01264	0.133309	0.0253911
Tb927.11.5470	20.38	20.57	19.59	19.4	16.89	17.6	18.52	22.18	17.09	18.28	16.12	17.94	1.2	0.9	1.18	1.26	1.21	1.72	0.63	0.95	0.85	0.91	0.91	1.32	16.98	22.86	16.6	15.4	13.96	10.23	29.4	23.35	20.11	20.09	17.71	13.59	1.12	1.29	1.3	1.01	0	0	0	0	0.750851	0.205789	0.116714
Tb927.4.2290	71.59	61.81	65.55	56.75	28.43	33.82	79.76	72.76	79.56	62.96	33.75	39.38	8.26	7.65	8.64	8.85	5.73	7.4	9.03	7.45	8.42	7.62	4.87	7.21	8.67	8.08	7.59	6.41	4.96	4.57	8.83	9.77	9.45	8.26	6.93	5.46	1.67	1.15	1.3	1.13	0	0	0	0	0.457284	0.220093	0.0906879
Tb927.9.13225	11.58	10.91	7.59	8.24	6.79	4.64	13.29	14.28	14.38	9.8	9.12	8.05	2.45	2.28	1.53	2.57	1.65	2.06	2.59	3.25	3.34	1.98	2.53	2.07	4.73	4.79	4.96	3.21	4.12	2.25	5.13	4.39	4.31	4.95	3.6	3.89	1.53	0.96	1.3	1.35	0	0	0	0	0.902392	0.244351	0.415548
Tb927.10.2210	32.5	29.64	32.42	9.72	4.71	3.61	33.69	32.72	45.08	10	9.27	9.84	27.14	25.69	24.26	12.25	6.02	4.41	26.54	26.87	35.48	7.67	13.89	8.67	1.2	1.15	1.34	0.79	0.78	0.82	1.27	1.22	1.27	1.3	0.67	1.13	5.24	1.02	1.3	1.27	0	0	0	0	0.961341	0.347125	0.375489
Tb927.8.4600	38.8	43.64	42.33	27.24	20.67	17.03	52.09	61.11	56.13	39.71	31.01	33.72	30.88	31.7	32.16	29.68	35.18	32.56	37.83	40.12	40.15	35.75	42.52	42.11	1.26	1.38	1.32	0.92	0.59	0.52	1.38	1.52	1.4	1.11	0.73	0.8	1.92	1.09	1.3	1.19	0	0	0	0	0.646504	0.394027	0.0392896
Tb927.2.4240	45.86	43.34	44.07	19.53	10.43	6.54	44.52	46.13	39.67	19.95	13.38	11.59	56.69	55.84	55.42	44.5	30.57	22.65	53.93	51.81	50.72	31.99	40.49	26.33	0.81	0.78	0.8	0.44	0.34	0.29	0.83	0.89	0.78	0.62	0.33	0.44	3.65	1.05	1.3	1.24	0	0	0	0	0.856445	0.439765	0.0453734
Tb927.10.2490	58.77	50.86	56.56	35.74	21.64	14.91	67.76	68.93	77.33	45.04	35.22	33.3	117.49	100.3	108.35	150.07	138.58	152.67	123.36	120.41	108.18	190.46	168.35	162.64	0.5	0.51	0.52	0.24	0.16	0.1	0.55	0.57	0.71	0.24	0.21	0.2	2.3	1.2	1.3	1.08	0	0	0	0	0.744478	0.618246	0.0222811
Tb10.v4.0033	12.2	10.31	7.51	3.53	1.8	1.2	39	36.46	41.15	5.59	6.54	5.04	8.51	7.69	6.24	7.85	9.03	7.51	24.54	25.06	27.77	11.02	33.4	14.65	1.43	1.34	1.2	0.45	0.2	0.16	1.59	1.45	1.48	0.51	0.2	0.34	4.6	1.14	1.3	1.14	0	0	0	0	0.599214	3.87459	0.0116439
Tb927.11.12080	24.65	27.96	24.31	27.85	32.51	30.04	30.35	35.06	24.36	34.73	37.45	30.71	2.2	3.14	2.36	3.97	4.76	4.93	3.26	3.74	3.23	3.71	4.31	4	11.2	8.9	10.3	7.02	6.83	6.09	9.31	9.37	7.54	9.36	8.69	7.68	0.85	0.86	1.29	1.5	0	0	0	0	0.758454	0.0379425	0.847841
Tb927.10.12260	441.21	484.72	462.66	364.26	272.11	212.12	322.34	294.57	348.53	304.04	173.83	282.93	129.82	142.56	141.61	148.46	164.49	153.81	76.5	68.11	85.6	107.34	90.26	123.17	3.4	3.4	3.27	2.45	1.65	1.38	4.21	4.32	4.07	2.83	1.93	2.3	1.64	1.25	1.29	1.03	0	0	0	0	0.141016	0.46536	0.0240759
Tb927.2.4150	23.32	21.35	20.9	17.35	10.77	8.48	26.29	21.81	19.28	17.31	12.47	10.97	11.21	9.75	9.21	12.9	13.2	10.84	10.16	11.19	9.94	9.9	12.01	11.12	2.08	2.19	2.27	1.34	0.82	0.78	2.59	1.95	1.94	1.75	1.04	0.99	1.79	0.99	1.29	1.3	0	0	0	0	0.990833	0.493922	0.0619029
Tb927.3.2440	25.69	17.83	13.83	7.1	6.5	4.01	31.9	26.87	30.73	7.41	15.71	8.01	0.58	0.56	0.52	0.87	0.34	0.57	1.63	0.7	1.56	0.36	1.11	0.85	44.29	31.84	26.6	8.16	19.12	7.04	19.57	38.39	19.7	20.58	14.15	9.42	3.26	0.76	1.29	1.7	0	0	0	0	0.85418	0.586369	0.224134
Tb927.2.3090	10.54	6.7	3.1	1.48	0.87	0.46	7.57	6.01	4.19	1.02	1.82	0.94	38.6	23.8	9.08	6.76	6.11	7.17	25.42	16.71	14.76	4.77	10.95	6.03	0.27	0.28	0.34	0.22	0.14	0.06	0.3	0.36	0.28	0.21	0.17	0.16	7.24	1.06	1.29	1.22	0	0	0	0	0.939363	0.826998	0.0238759
Tb927.2.5870	24.98	26.8	25.79	4.93	0.87	0.4	30.01	37.78	75.33	11.07	7.65	11.4	10.75	10.95	9.51	2.66	1.55	0.57	9.36	10.41	23.1	6.14	7.15	10.13	2.32	2.45	2.71	1.85	0.56	0.7	3.21	3.63	3.26	1.8	1.07	1.13	12.51	1.35	1.29	0.96	0	0	0	0	0.278325	2.09418	0.0146044
Tb927.2.170	28.64	15.85	17.54	6.54	4.42	3.61	25.79	14.9	19.69	4.77	7.4	5.28	17.02	10.27	9.99	5.97	3.78	3.38	12.62	6.17	9.23	3.4	5.93	3.25	1.68	1.54	1.76	1.1	1.17	1.07	2.04	2.41	2.13	1.4	1.25	1.62	4.26	1.32	1.28	0.97	0	0	0	0	0.376494	0.22281	0.0183466
Tb927.11.12140	8.34	4.38	1.57	2.92	2.91	1.72	20.65	12.63	9.23	8.68	21.03	7.68	1.45	0.94	0.17	1.13	0.58	0.75	4.1	1.77	1.3	2.08	4.76	1.88	5.75	4.66	9.24	2.58	5.02	2.29	5.04	7.14	7.1	4.17	4.42	4.09	1.89	0.98	1.28	1.31	0	0	0	0	0.990785	0.445579	0.0944479
Tb927.11.1560	99.69	79.81	88.94	40.54	25.47	22.19	79.59	54.53	74.59	23.51	26.5	28.97	21.62	19.54	17.11	8.54	3.93	2.01	15.63	10.37	16.65	3.61	2.89	2.26	4.61	4.08	5.2	4.75	6.48	11.04	5.09	5.26	4.48	6.51	9.17	12.82	3.04	1.07	1.28	1.2	0	0	0	0	0.897998	0.515312	0.139714
Tb927.8.980	112.3	142.47	120.22	75.58	65.84	46.95	161.94	189.63	190.78	110.44	83.11	94.62	73.46	79.16	73.44	65.69	75.79	63.12	79.89	89.3	74.29	80.68	96.49	72.11	1.53	1.8	1.64	1.15	0.87	0.74	2.03	2.12	2.57	1.37	0.86	1.31	1.99	1.35	1.28	0.95	0	0	0	0	0.492522	0.536203	0.020362
Tb927.1.370	45.49	25.6	25.44	9.59	4.22	3.78	42.1	24.4	29.66	4.77	8.77	4.14	18.55	10.27	10.43	5.27	2.91	2.87	13.21	6.58	8.64	2.18	5.17	2.07	2.45	2.49	2.44	1.82	1.45	1.32	3.19	3.71	3.43	2.19	1.7	2	5.49	1.4	1.28	0.91	0	0	0	0	0.372297	0.626702	0.0123203
Tb927.10.5880	57.52	47.51	45.56	7.02	1.8	1.43	113.54	113.58	144.36	11.73	10.69	7.3	85.7	75.34	73.18	23.67	15.62	12.96	114.54	113.13	144.29	32.75	69.02	42.34	0.67	0.63	0.62	0.3	0.12	0.11	0.99	1	1	0.36	0.15	0.17	14.69	1.56	1.28	0.82	0	0	0	0	0.137103	1.50774	0.0181087
Tb927.10.8830	27.39	21.56	16.67	1.83	1.31	1.03	28.01	31.15	34.48	1.93	3.75	2.26	62.42	55.32	42.72	13.56	11.6	18.75	66.68	64.77	89.68	13.1	31.57	22.8	0.44	0.39	0.39	0.13	0.11	0.05	0.42	0.48	0.38	0.15	0.12	0.1	15.74	1.05	1.28	1.22	0	0	0	0	0.932302	1.94564	0.0134797
Tb927.9.6620	58.27	66.92	66.51	40.67	19.51	16.91	59.69	61.77	50.64	25.9	24.27	18.79	43.58	49.57	47.35	43.67	37.75	40.02	35.7	38.27	33.96	29.86	28.63	27.93	1.34	1.35	1.4	0.93	0.52	0.42	1.67	1.61	1.49	0.87	0.85	0.67	2.49	1.17	1.28	1.09	0	0	0	0	0.455156	5.28054	0.0105126
Tb927.9.6130	42.62	44.76	41.19	23.84	16.55	9.63	58.94	75.43	66.62	28.54	36.34	25.25	107.53	117.52	100.41	89.66	84.82	59.68	130.47	155.31	144.77	89.72	142.61	107.76	0.4	0.38	0.41	0.27	0.2	0.16	0.45	0.49	0.46	0.32	0.25	0.23	2.57	1.18	1.27	1.08	0	0	0	0	0.318218	0.54532	0.0191828
Tb927.5.1260	9.63	10.39	10.43	2.22	1.02	1.43	16.8	23.95	20.43	3.15	4.61	4.1	12.87	14.52	13.57	5.58	5	4.19	18.52	25.6	31.44	6.6	17.79	9.04	0.75	0.72	0.77	0.4	0.2	0.34	0.91	0.94	0.65	0.48	0.26	0.45	6.52	1.12	1.27	1.13	0	0	0	0	0.87835	0.590906	0.0315761
Tb927.2.950	12.49	7	6.94	1.92	1.55	0.69	12.62	7.16	9.05	1.32	1.67	1.08	5.93	3.05	2.4	1.61	0.82	0.75	3.6	1.89	1.74	0.51	1.62	0.75	2.11	2.3	2.89	1.19	1.89	0.92	3.51	3.79	5.2	2.59	1.03	1.44	6.35	1.71	1.27	0.74	0	0	0	0	0.520515	0.779898	0.0341377
Tb927.1.290	21.58	12.24	11.13	3.53	1.46	0.69	19.77	10.86	12.98	2.44	2.94	1.13	6.52	3.74	4.1	1.44	0.68	0.92	4.68	1.85	2.22	0.66	1.93	0.71	3.31	3.27	2.71	2.45	2.15	0.75	4.22	5.87	5.85	3.7	1.52	1.59	7.91	1.72	1.27	0.74	0	0	0	0	0.460045	0.807357	0.0404184
Tb927.10.1350	46.03	44.84	53.11	17.13	6.55	4.93	47.03	49.96	65.36	17.21	9.88	11.73	24.28	26.89	28.28	19.7	19.99	21.56	24.25	26.13	34.4	20.46	23.41	21.52	1.9	1.67	1.88	0.87	0.33	0.23	1.94	1.91	1.9	0.84	0.42	0.55	5.03	1.06	1.27	1.2	0	0	0	0	0.828825	1.39417	0.0186855
Tb927.10.2550	39.39	48.19	44.9	55.36	60.94	70.23	46.32	46.91	36	63.37	55.29	59.39	65.49	69.88	65.46	51.08	37.94	35.26	44.65	45.1	38.93	32.19	29.44	28.5	0.6	0.69	0.69	1.08	1.61	1.99	1.04	1.04	0.92	1.97	1.88	2.08	0.71	1.52	1.27	0.84	0	0	0	0	0.197531	7.47596	0.00937331
Tb927.11.4180	34.2	26.54	23.26	3.27	0.34	0.52	57.69	53.99	61.91	3.35	4.56	1.65	65.91	47.29	46.78	20.18	6.74	5.68	77.08	73.99	96.91	19.5	37.6	18.89	0.52	0.56	0.5	0.16	0.05	0.09	0.75	0.73	0.64	0.17	0.12	0.09	20.34	1.34	1.27	0.95	0	0	0	0	0.367839	17.0506	0.00949203
Tb927.2.5120	47.64	43.73	44.29	37.35	29.45	20.07	33.74	32.39	23.76	19.19	28.94	14.51	6.35	5.58	5.37	6.36	6.02	4.7	4.77	3.79	3.08	2.74	4.66	2.54	7.5	7.84	8.25	5.87	4.89	4.27	7.07	8.55	7.71	7	6.21	5.71	1.56	0.99	1.26	1.27	0	0	0	0	0.987246	0.115533	0.0726652
Tb927.8.3740	20.21	18.9	15.84	21.23	19.17	11.92	26.63	29.22	19.09	25.79	32.69	21.19	2.95	2.96	2.88	2.83	3.3	2.24	3.05	3.54	2.45	2.79	4.1	3.34	6.85	6.39	5.5	7.5	5.81	5.32	8.73	8.25	7.79	9.24	7.97	6.34	1.05	1.32	1.26	0.95	0	0	0	0	0.366443	0.205928	0.691966
Tb927.11.9830	40.76	38.53	42.15	47.29	41.49	38.53	44.98	45.1	32.4	47.17	59.55	41.73	1.66	2.32	1.75	2.4	2.91	4.19	2.05	1.6	0.96	2.28	3.5	2.5	24.55	16.61	24.09	19.7	14.26	9.2	21.94	28.19	33.75	20.69	17.01	16.69	0.95	1.29	1.26	0.98	0	0	0	0	0.783492	0.389456	0.0989275
Tb927.9.6560	39.47	32.52	17.76	11.03	7.81	5.1	109.94	107.12	104.99	52.96	64.26	48.42	5.98	4.51	3.01	1.61	1.89	1.83	9.24	9.63	8.97	7.26	11.25	11.12	6.6	7.21	5.9	6.85	4.13	2.79	11.9	11.12	11.7	7.29	5.71	4.35	3.75	1.76	1.26	0.72	0	0	0	0	0.120233	0.758144	0.0251978
Tb927.8.7760	51.92	34.32	38.05	19.22	10.58	8.54	65.42	64.86	80.19	23.36	22.3	19.5	10.13	7.82	8.25	6.49	5.29	4.3	12.12	10.99	15.79	6.6	8.67	7.39	5.13	4.39	4.61	2.96	2	1.99	5.4	5.9	5.08	3.54	2.57	2.64	3.24	1.16	1.26	1.09	0	0	0	0	0.573047	0.979835	0.0143531
Tb927.11.8170	19.3	17.4	13.4	8.15	1.02	1.26	30.64	36.05	42.86	12.54	4.66	5.84	13.03	14.17	11.56	9.11	3.45	3.5	20.94	21.93	35.03	15.18	9.27	9.47	1.48	1.23	1.16	0.89	0.3	0.36	1.46	1.64	1.22	0.83	0.5	0.62	4.8	1.12	1.26	1.13	0	0	0	0	0.861398	1.32017	0.0185762
Tb927.7.5240	28.89	25.13	28.28	8.54	2.81	1.78	45.82	49.38	56.54	8.83	6.03	5.28	51.88	47.94	49.88	36.35	29.89	31.13	71.32	78.73	93.42	37.12	55.8	42.11	0.56	0.52	0.57	0.23	0.09	0.06	0.64	0.63	0.61	0.24	0.11	0.13	6.27	1.14	1.26	1.11	0	0	0	0	0.3695	1.8759	0.016248
Tb927.11.15160	21.25	13.19	5.67	2.05	0.82	0.17	24.29	18.93	14.2	1.78	3.5	1.32	37.14	24.1	12.66	11.64	10.14	11.7	48.87	31.28	31.99	10.92	32.18	19.17	0.57	0.55	0.45	0.18	0.08	0.01	0.5	0.61	0.44	0.16	0.11	0.07	13.19	0.99	1.26	1.27	0	0	0	0	0.98872	2.08264	0.0161516
Tb927.3.5160	59.72	48.54	49.92	30.9	24.79	25.51	48.07	57	69.07	39.1	24.68	36.08	11	10.87	9.69	11.55	13.39	19.32	9.32	9.09	12.2	13.46	13.28	13.71	5.43	4.47	5.15	2.68	1.85	1.32	5.16	6.27	5.66	2.9	1.86	2.63	1.95	1.14	1.26	1.11	0	0	0	0	0.75126	2.28856	0.0121022
Tb927.10.390	34.99	33.16	28.23	6.63	5.29	4.41	39.29	45.35	44.78	5.18	13.18	7.25	75.95	71.82	60	34.7	37.36	34.63	79.34	84.45	86.34	25.95	67.45	40.22	0.46	0.46	0.47	0.19	0.14	0.13	0.5	0.54	0.52	0.2	0.2	0.18	5.9	1.12	1.26	1.13	0	0	0	0	0.422518	19.1658	0.0118288
Tb927.4.780	16.64	16.97	14.92	6.76	7.04	4.01	14.3	14.65	14.83	5.84	10.74	5.7	7.59	7.86	6.41	4.1	4.8	3.1	5.94	7.08	6.19	2.94	6.39	3.06	2.19	2.16	2.33	1.65	1.47	1.29	2.41	2.07	2.4	1.99	1.68	1.86	2.72	1.03	1.25	1.21	0	0	0	0	0.938831	0.0687167	0.046928
Tb927.10.12360	10.25	9.15	8.81	4.93	2.72	1.03	13.84	14.07	13.2	5.48	4.51	3.63	5.35	5.63	4.97	3.27	1.5	1.03	7.23	6.71	7.79	2.54	2.94	2.12	1.92	1.63	1.77	1.51	1.81	1	1.91	2.1	1.69	2.16	1.53	1.71	3.25	1.07	1.25	1.17	0	0	0	0	0.875085	0.305833	0.688288
Tb927.5.1700	45.15	52.02	49.31	16.48	14.36	15.99	48.12	61.15	65.36	13.46	30.2	31.84	138.91	152.96	162.16	77.8	73.95	54.86	119.97	155.23	180.29	55.5	112.3	90.34	0.33	0.34	0.3	0.21	0.19	0.29	0.4	0.39	0.36	0.24	0.27	0.35	3.13	1.19	1.25	1.05	0	0	0	0	0.386978	0.310108	0.0954149
Tb927.8.4080	15.77	13.53	12.79	15.34	15.43	11.52	14.92	15.68	13.24	14.37	17.64	14.51	1.87	1.2	1.31	1.09	2.09	1.26	0.84	0.74	1.89	1.17	1.57	0.99	8.43	11.28	9.76	14.07	7.38	9.14	17.76	21.19	7.01	12.28	11.24	14.66	1	1.56	1.25	0.8	0	0	0	0	0.837369	0.348276	0.619448
Tb927.11.10920	65.12	54.03	55.77	31.21	12.47	11.7	53.76	47.37	46.86	29.04	21.34	15.12	45.07	37.8	41.19	34.3	21.01	16.68	31.19	32.26	34.11	27.47	26.2	16.91	1.44	1.43	1.35	0.91	0.59	0.7	1.72	1.47	1.37	1.06	0.81	0.89	3.16	1.08	1.25	1.16	0	0	0	0	0.863361	0.360998	0.0218696
Tb927.4.5240	41	38.14	36.74	24.89	12.32	9.57	46.61	39.63	40.93	30.31	21.18	17.8	62.42	59.75	61.84	49.21	37.51	28.89	62.5	54.32	58.21	49.91	54.53	38.29	0.66	0.64	0.59	0.51	0.33	0.33	0.75	0.73	0.7	0.61	0.39	0.46	2.48	1.15	1.25	1.09	0	0	0	0	0.381537	0.393409	0.069941
Tb927.10.1000	34.11	33.8	26.05	8.72	3.93	2.35	24.62	18.11	18.94	7.11	11.05	5.46	12.08	13.1	9.43	3.92	2.18	2.29	6.94	4.81	6.45	2.49	5.42	3.82	2.82	2.58	2.76	2.22	1.8	1.03	3.55	3.77	2.94	2.86	2.04	1.43	6.26	1.26	1.25	0.99	0	0	0	0	0.604745	0.5494	0.0766651
Tb927.9.8880	245.98	263.99	255.2	251.72	226.5	175.14	252.36	268.61	240.01	232.35	214.62	203.47	447.64	397.7	412.73	527.28	548.64	516.6	316.99	298.19	270.41	392.8	420.68	460.07	0.55	0.66	0.62	0.48	0.41	0.34	0.8	0.9	0.89	0.59	0.51	0.44	1.17	1.42	1.25	0.88	0	0	0	0	0.236644	0.588588	0.0144919
Tb927.5.910	81.84	100.72	107.53	28.33	16.74	15.08	100.87	146.13	166.64	33.87	23.21	20.58	63.71	88.35	89.33	33.13	31.59	32.39	53.22	69.71	112	31.99	35.32	34.57	1.28	1.14	1.2	0.86	0.53	0.47	1.9	2.1	1.49	1.06	0.66	0.6	4.82	1.52	1.25	0.82	0	0	0	0	0.538288	0.874894	0.0212806
Tb927.5.3310	30.46	45.96	48.31	23.49	18.92	13.87	39.21	52.14	55.13	27.42	38.87	30.57	24.15	33.33	38.01	22.97	32.27	30.1	27.84	41.15	36.41	26.86	48.6	40.32	1.26	1.38	1.27	1.02	0.59	0.46	1.41	1.27	1.51	1.02	0.8	0.76	2.22	1.07	1.25	1.17	0	0	0	0	0.836713	1.03128	0.0184248
Tb927.11.1230	6.85	4.64	3.97	0.39	0.29	0.23	15.76	16.5	15.87	0.91	1.77	0.52	14.36	14	12.09	5.54	3.88	4.13	20.23	23.91	28.55	7.31	22.04	10.27	0.48	0.33	0.33	0.07	0.07	0.06	0.78	0.69	0.56	0.12	0.08	0.05	16.99	1.78	1.25	0.7	0	0	0	0	0.386453	1.28093	0.0177279
Tb927.3.4630	60.76	60.78	57.65	15.47	11.16	9.34	63.29	96.87	112.22	28.08	22.15	19.59	6.64	7.13	6.55	3.36	3.74	3.1	4.93	6.75	7.86	4.42	6.89	5.32	9.15	8.52	8.8	4.6	2.98	3.01	12.84	14.35	14.28	6.35	3.21	3.68	4.98	1.57	1.25	0.8	0	0	0	0	0.235109	1.95035	0.0141735
Tb927.7.2650	54.66	46.17	38.45	9.02	2.13	1.26	63.71	45.97	72.33	8.83	9.88	5.13	66.03	45.49	41.63	25.63	12.71	10.03	78.09	63.87	94.2	24.07	47.23	22.75	0.83	1.01	0.92	0.35	0.17	0.13	0.82	0.72	0.77	0.37	0.21	0.23	11.22	0.84	1.25	1.49	0	0	0	0	0.573964	2.87776	0.0132382
Tb927.7.4730	7.14	5.03	4.89	1.09	0.29	0.29	14.97	17.82	15.31	1.68	4.87	2.59	5.81	4.3	3.93	1.66	1.36	0.57	11.87	13.25	12.86	2.84	10.29	3.91	1.23	1.17	1.24	0.66	0.21	0.51	1.26	1.34	1.19	0.59	0.47	0.66	10.22	1.04	1.25	1.2	0	0	0	0	0.860288	6.55292	0.0106422
Tb927.10.4750	46.61	45.14	46.26	17.96	11.31	14.56	39.5	44.65	58.09	12.14	11.5	15.68	102.22	105.84	104.6	85.47	74	75.16	79.55	83.99	116.52	51.18	53.97	64.29	0.46	0.43	0.44	0.21	0.15	0.19	0.5	0.53	0.5	0.24	0.21	0.24	3.15	1.15	1.25	1.09	0	0	0	0	0.277705	51.3921	0.019683
Tb927.10.620	35.57	33.68	32.47	11.9	4.66	2.06	115.79	126.63	128.98	21.68	34.97	15.21	28.22	29.17	29.5	21.23	19.51	14.16	69.73	82.1	83.38	46.31	88.13	47.95	1.26	1.15	1.1	0.56	0.24	0.15	1.66	1.54	1.55	0.47	0.4	0.32	5.46	1.35	1.25	0.93	0	0	0	0	0.187306	338.794	0.0213085
Tb927.4.2740	141.52	116.96	51.45	45.24	47.02	35.83	164.54	118.93	74.63	27.37	100.6	48.14	56.86	46.6	17.54	25.59	25.09	26.43	63.04	45.39	28.03	13.81	53.41	20.72	2.49	2.51	2.93	1.77	1.87	1.36	2.61	2.62	2.66	1.98	1.88	2.32	2.42	0.99	1.24	1.25	0	0	0	0	0.990858	0.155583	0.0586885
Tb927.11.6870	211.58	138.87	75.84	92.41	106.02	71.26	201.57	109.26	111.85	75.4	219.44	135.32	244.61	163.87	92.51	75.49	68.66	44.2	236.19	135.76	134.13	45.55	131.1	64.43	0.86	0.85	0.82	1.22	1.54	1.61	0.85	0.8	0.83	1.66	1.67	2.1	1.58	0.98	1.24	1.27	0	0	0	0	0.871083	0.201341	0.0298508
Tb927.9.15560	11.04	9.15	9.73	6.41	2.81	2.52	18.02	17.28	11.75	9.39	11.2	5.6	4.57	4.25	4.23	3.7	2.23	1.95	8.03	6.91	5.52	4.37	7.09	3.53	2.42	2.15	2.3	1.73	1.26	1.29	2.24	2.5	2.13	2.15	1.58	1.59	2.55	1	1.24	1.24	0	0	0	0	1.01244	0.255503	0.103663
Tb927.8.7970	20.05	15.72	13.57	3.31	1.41	0.63	111.57	101.81	113.63	25.64	31.27	22.84	10.62	8.72	8.12	2.75	1.41	0.75	47.07	49.84	55.24	15.03	30.36	21.95	1.89	1.8	1.67	1.2	1	0.84	2.37	2.04	2.06	1.71	1.03	1.04	9.22	1.21	1.24	1.02	0	0	0	0	0.487187	0.494857	0.0495411
Tb927.6.4180	49.68	54.72	43.73	35.79	32.75	30.84	62.2	69.84	49.46	47.47	50.48	43.05	61.22	68.3	63.28	56.18	72.64	61.92	64.59	73.66	57.06	66.21	79.41	70.13	0.81	0.8	0.69	0.64	0.45	0.5	0.96	0.95	0.87	0.72	0.64	0.61	1.49	1.21	1.24	1.02	0	0	0	0	0.422789	0.564291	0.0143377
Tb927.7.3540	40.01	43.43	37.14	31.95	28.63	16.57	53.05	59.55	52.38	33.21	45.56	29.77	44.78	45.36	42.98	55.79	66.57	64.5	46.78	53.33	46.49	59.71	76.07	74.7	0.89	0.96	0.86	0.57	0.43	0.26	1.13	1.12	1.13	0.56	0.6	0.4	1.56	1.25	1.24	0.99	0	0	0	0	0.363987	0.845397	0.0200065
Tb927.7.5990	106	81.95	85.4	37.35	12.57	7.57	72.15	56.05	76.78	23.61	16.27	11.96	67.9	57.51	51.01	46.16	23.39	16.8	44.69	34.07	51.79	24.17	27.26	18.46	1.56	1.42	1.67	0.81	0.54	0.45	1.61	1.65	1.48	0.98	0.6	0.65	4.75	1.02	1.24	1.22	0	0	0	0	0.968789	0.845504	0.0202745
Tb927.8.1720	107.99	103.86	112.81	60.98	41.63	46.55	102.54	112.43	117.37	93.78	51.18	71.21	75.49	72.93	82.08	70.44	72.2	94.99	67.6	74.86	81.41	98.2	70.14	98.3	1.43	1.42	1.37	0.87	0.58	0.49	1.52	1.5	1.44	0.95	0.73	0.72	2.18	1.06	1.24	1.17	0	0	0	0	0.517984	0.845642	0.0179264
Tb927.4.1480	84.96	76.76	81.34	44.81	14.17	13.47	91.01	94.2	97.8	42.8	25.74	19.83	45.24	46.56	46.08	45.98	36.59	36.63	42.47	44.07	49.86	40.37	47.89	36.64	1.88	1.65	1.77	0.97	0.39	0.37	2.14	2.14	1.96	1.06	0.54	0.54	3.35	1.18	1.24	1.05	0	0	0	0	0.391814	1.31335	0.0196204
Tb927.11.11800	81.43	57.9	61.75	39.23	12.32	11.12	98.49	97.2	100.99	47.07	20.02	23.74	19.38	15.76	16.71	17.09	11.5	10.26	18.39	17.86	22.1	17.37	15.46	15.68	4.2	3.67	3.7	2.3	1.07	1.08	5.36	5.44	4.57	2.71	1.29	1.51	3.21	1.33	1.24	0.93	0	0	0	0	0.392267	1.6884	0.0162263
Tb927.1.1350	28.35	23.58	24.92	8.02	2.28	1.55	33.07	30.58	41.82	6.65	5.12	3.49	12.78	10.48	11.48	8.28	5.77	5.5	13.54	10.58	17.76	5.64	10.85	8.81	2.22	2.25	2.17	0.97	0.4	0.28	2.44	2.89	2.35	1.18	0.47	0.4	6.49	1.16	1.24	1.07	0	0	0	0	0.735159	2.16432	0.015831
Tb927.1.2190	70.01	69.37	61.4	21.36	9.61	7.51	67.72	74.2	121.42	28.18	18.55	36.78	15.77	15.98	15.62	9.07	8.69	6.48	11.87	14.24	23.95	11.68	13.23	18.93	4.44	4.34	3.93	2.36	1.11	1.16	5.71	5.21	5.07	2.41	1.4	1.94	5.22	1.26	1.24	0.98	0	0	0	0	0.326393	4.48051	0.010712
Tb927.8.1760	26.85	17.7	17.24	17.04	15.77	13.82	36.62	29.3	28.44	27.77	39.68	25.1	6.56	3.69	4.36	5.14	3.49	4.93	6.86	6.75	5.6	5.03	10.19	6.78	4.09	4.8	3.95	3.32	4.52	2.8	5.34	4.34	5.08	5.52	3.89	3.7	1.33	1.15	1.23	1.07	0	0	0	0	0.745266	0.355245	0.472129
Tb927.4.1360	123.34	169.58	147.5	87.52	88.8	71.6	108.44	148.6	99.25	78.09	99.78	81.15	43.83	65.55	54.29	40.45	55.95	41.33	30.39	39.55	29.62	29.75	48.65	39.66	2.81	2.59	2.72	2.16	1.59	1.73	3.57	3.76	3.35	2.62	2.05	2.05	1.78	1.32	1.23	0.93	0	0	0	0	0.2785	0.461292	0.0179404
Tb927.3.2250	15.44	14.48	15.1	9.94	7.76	4.82	14.67	13.91	13.75	6.85	9.58	5.37	2.03	1.59	2.27	1.26	1.55	1.61	2.42	2.18	2.04	0.91	1.62	0.89	7.61	9.11	6.65	7.89	5.01	2.99	6.06	6.38	6.74	7.53	5.91	6.03	2	0.82	1.23	1.5	0	0	0	0	0.74555	0.499877	0.87861
Tb11.0870	20.13	19.37	21.51	23.8	20.09	22.76	20.23	21.69	22.76	24.98	15.56	25.76	1.49	0.9	1.18	1.96	3.15	2.92	0.88	1.23	1.22	1.42	2.28	3.25	13.51	21.52	18.23	12.14	6.38	7.79	22.99	17.63	18.66	17.59	6.82	7.93	0.92	1.11	1.23	1.11	0	0	0	0	0.908656	0.706222	0.113703
Tb927.8.5110	28.18	15.59	16.45	7.67	2.04	3.84	64.13	68.11	87.42	27.27	12.26	16.63	24.98	15.29	9.51	11.42	7.62	9.06	68.39	46.38	52.16	28.33	46.37	36.64	1.13	1.02	1.73	0.67	0.27	0.42	0.94	1.47	1.68	0.96	0.26	0.45	4.44	1.05	1.23	1.17	0	0	0	0	0.978786	0.818235	0.0668718
Tb927.3.2930	7.3	2.92	0.65	0.92	0.44	0.23	13.71	9.09	4.15	0.76	3.95	1.08	28.43	15.81	5.15	7.1	6.7	9.52	48.16	29.67	19.06	8.63	32.03	16.63	0.26	0.18	0.13	0.13	0.07	0.02	0.28	0.31	0.22	0.09	0.12	0.06	6.84	1.42	1.23	0.87	0	0	0	0	0.728646	1.67294	0.0180413
Tb927.8.2160	144.01	149.65	147.72	47.34	26.93	28.66	114.79	114.12	197.23	66.82	38.16	54.78	36.69	36.21	35.13	27.02	28.48	28.55	28.72	27.45	39.78	35.75	33.14	35.89	3.93	4.13	4.2	1.75	0.95	1	4	4.16	4.96	1.87	1.15	1.53	4.29	1.07	1.23	1.15	0	0	0	0	0.874876	2.51824	0.0124349
Tb927.11.900	98.73	104.63	89.46	50.34	26.69	19.03	128.88	138.48	124.94	64.64	55.9	54.12	58.97	59.32	53.63	47.51	43.38	32.85	62.75	59.96	61.84	62.61	61.47	63.73	1.67	1.76	1.67	1.06	0.62	0.58	2.05	2.31	2.02	1.03	0.91	0.85	3.05	1.25	1.23	0.98	0	0	0	0	0.427451	3.49251	0.0105354
Tb927.10.2270	90.52	83.5	81.04	50.13	37.8	25.51	85.49	91.89	120.78	45.34	48.8	43.14	45.53	39.09	36.39	43.41	38.14	28.21	40.63	39.75	40.41	32.19	46.57	34.52	1.99	2.14	2.23	1.15	0.99	0.9	2.1	2.31	2.99	1.41	1.05	1.25	2.25	1.16	1.22	1.05	0	0	0	0	0.837792	0.211978	0.0411869
Tb927.6.3140	34.94	34.23	31.94	38.75	44.25	38.47	33.94	33.21	24.95	39.15	53.06	47.48	46.65	45.83	43.11	48.03	45.32	35.95	43.06	40.7	35.07	40.26	46.98	34.52	0.75	0.75	0.74	0.81	0.98	1.07	0.79	0.82	0.71	0.97	1.13	1.38	0.83	1.04	1.22	1.17	0	0	0	0	0.901847	0.262816	0.0848638
Tb927.2.540	65.41	48.54	50.45	27.46	17.23	11.06	49.41	28.23	26.28	11.78	21.18	7.68	9.17	6.1	5.98	1.92	0.97	0.69	4.68	2.39	2.78	0.51	1.11	0.47	7.13	7.96	8.44	14.3	17.76	16.03	10.56	11.81	9.45	23.1	19.08	16.34	2.95	1.35	1.22	0.9	0	0	0	0	0.443961	0.274221	0.0437937
Tb927.5.1990	23.57	16.32	5.37	5.67	5.14	4.24	25.75	18.81	13.64	5.03	19.41	8.2	18.09	12.46	4.67	5.06	4.37	7.51	20.02	16.58	13.05	4.27	16.52	7.16	1.3	1.31	1.15	1.12	1.18	0.56	1.29	1.13	1.05	1.18	1.17	1.15	3.01	0.92	1.22	1.33	0	0	0	0	0.844151	0.394328	0.904042
Tb927.7.7060	14.36	13.49	11.52	3.97	4.66	4.3	16.85	14.2	17.16	4.52	9.32	5.23	40.8	37.07	30.46	12.16	11.55	15.54	43.1	38.27	47.45	8.23	22.5	19.73	0.35	0.36	0.38	0.33	0.4	0.28	0.39	0.37	0.36	0.55	0.41	0.27	3.04	1.03	1.22	1.18	0	0	0	0	0.89123	0.477519	0.704078
Tb927.2.4720	30.59	22.55	25.44	15.04	12.03	18.23	34.4	29.42	30.96	25.84	17.64	23.83	49.55	43.55	35	28.59	30.37	46.44	56.06	51.15	58.17	35.03	48.6	46.49	0.62	0.52	0.73	0.53	0.4	0.39	0.61	0.58	0.53	0.74	0.36	0.51	1.73	0.92	1.22	1.33	0	0	0	0	0.903055	0.488642	0.780857
Tb927.11.12580	77.65	77.49	76.41	63.68	35.23	35.49	98.24	99.88	98.84	94.14	53.21	60.29	61.51	54.08	56.08	75.41	62.25	66.16	71.4	68.19	67.36	93.53	83.72	83.18	1.26	1.43	1.36	0.84	0.57	0.54	1.38	1.46	1.47	1.01	0.64	0.72	1.72	1.06	1.22	1.15	0	0	0	0	0.778102	0.56142	0.0328857
Tb927.2.5350	10	7.9	8.38	3.09	0.78	0.97	4.89	3.91	4.78	0.96	0.81	0.42	7.89	7.47	8.55	3.97	1.84	2.75	4.68	4.36	5.08	1.37	1.01	1.08	1.27	1.06	0.98	0.78	0.42	0.35	1.04	0.9	0.94	0.7	0.8	0.39	5.43	0.87	1.22	1.4	0	0	0	0	0.79279	0.627536	0.115174
Tb927.3.3940	49.06	27.88	11.7	8.5	8.25	5.1	66.34	45.89	41.56	10.71	20.93	16.39	98.19	54.46	28.23	32.43	35.03	51.77	121.35	86.46	74.33	34.68	109.16	71.31	0.5	0.51	0.41	0.26	0.24	0.1	0.55	0.53	0.56	0.31	0.19	0.23	4.06	1.15	1.22	1.06	0	0	0	0	0.688023	1.06887	0.0199823
Tb09.v4.0058	12.99	12.37	9.51	2.7	0.78	0.29	15.43	13.7	17.91	1.37	2.64	0.71	10.71	11.38	9.69	5.4	3.2	2.69	12.83	11.36	15.09	2.94	7.2	3.63	1.21	1.09	0.98	0.5	0.24	0.11	1.2	1.21	1.19	0.47	0.37	0.2	9.25	1.1	1.22	1.11	0	0	0	0	0.800605	1.54315	0.0186366
Tb927.4.4020	55.78	41.19	38.4	33.74	15.67	15.54	80.09	77.45	73.96	51.03	42.67	36.55	25.27	21.86	17.46	29.2	21.11	25.51	35.07	33.33	30.36	41.28	49.56	38.48	2.21	1.88	2.2	1.16	0.74	0.61	2.28	2.32	2.44	1.24	0.86	0.95	2.08	1.12	1.22	1.09	0	0	0	0	0.680751	2.04545	0.013493
Tb927.3.4930	48.14	37.76	36.18	59.76	50.32	51.83	44.65	41.98	34.22	64.03	49.21	49.36	4.98	3.74	4.1	8.37	7.86	8.37	3.76	3.87	2.82	7.11	7.2	6.22	9.67	10.1	8.82	7.14	6.4	6.19	11.88	10.85	12.13	9.01	6.83	7.94	0.75	1.22	1.21	0.99	0	0	0	0	0.369484	0.280084	0.0218714
Tb927.10.8950	26.93	27.32	22.3	14.51	8.05	4.24	42.39	42.88	27.29	14.32	24.53	7.91	7.51	8.59	7.37	4.66	3.11	2.06	11.2	13.05	9.71	4.42	6.59	3.25	3.59	3.18	3.03	3.11	2.59	2.06	3.78	3.29	2.81	3.24	3.72	2.43	2.86	1.01	1.21	1.2	0	0	0	0	0.991633	0.329681	0.75401
Tb927.11.10360	44.49	43.81	41.85	33.52	19.31	24.82	48.45	58.97	49.01	45.49	19.97	26.94	11.66	12.16	11.48	12.12	9.7	11.12	12.46	13.54	12.98	13.71	7.09	11.68	3.82	3.6	3.65	2.77	1.99	2.23	3.89	4.36	3.78	3.32	2.82	2.31	1.68	1.09	1.21	1.11	0	0	0	0	0.765182	0.339588	0.0437023
Tb927.9.2760	27.97	26.76	28.02	9.72	2.28	1.89	27.3	31.93	37.67	9.34	5.27	6.12	13.61	12.76	12.22	6.89	1.99	1.83	12.5	15.19	19.17	5.43	4.56	4.19	2.06	2.1	2.29	1.41	1.15	1.03	2.18	2.1	1.97	1.72	1.16	1.46	5.96	0.97	1.21	1.25	0	0	0	0	0.902509	0.34173	0.054926
Tb927.10.3680	12.45	15.25	11.3	4.05	4.37	1.83	50.62	54.69	44.53	30.01	30.46	26.8	12.2	14	11.22	5.88	4.76	2.81	31.81	38.72	35.52	28.18	37.35	31.56	1.02	1.09	1.01	0.69	0.92	0.65	1.59	1.41	1.25	1.06	0.82	0.85	3.8	1.36	1.21	0.89	0	0	0	0	0.489965	0.373042	0.0266148
Tb927.10.8410	50.96	50.64	55.42	48.77	35.42	32.85	47.7	44.49	49.75	53.42	39.63	42.15	84.04	89.04	89.81	100.03	105.1	133.35	81.89	75.52	83.75	101.09	93.3	116.15	0.61	0.57	0.62	0.49	0.34	0.25	0.58	0.59	0.59	0.53	0.42	0.36	1.34	0.98	1.21	1.23	0	0	0	0	0.898059	0.477901	0.105154
Tb927.8.8270	33.04	29.12	26.92	14.04	5.77	6.94	26.59	25.47	33.11	10.66	7.8	9.7	36.94	30.8	28.71	19.66	12.86	9.29	23.24	19.88	25.99	11.58	14.14	11.4	0.89	0.95	0.94	0.71	0.45	0.75	1.14	1.28	1.27	0.92	0.55	0.85	3.33	1.33	1.21	0.91	0	0	0	0	0.314552	0.502658	0.0517705
Tb927.7.4980	31.54	27.66	30.42	25.76	20.86	12.78	32.73	31.07	24.91	23	24.73	16.34	1.91	2.06	2.36	1.96	2.28	1.43	1.84	1.48	1.41	1.32	1.93	2.17	16.51	13.43	12.89	13.14	9.15	8.94	17.79	20.99	17.67	17.42	12.81	7.53	1.51	1.32	1.21	0.92	0	0	0	0	0.460207	0.587316	0.161645
Tb927.8.6570	13.28	12.28	10.04	4.88	3.25	1.49	18.56	20.74	21.98	5.33	7.5	4.9	12.95	13.44	10.74	8.41	7.47	4.47	16.64	21.85	23.24	8.43	15.2	9.56	1.03	0.91	0.93	0.58	0.44	0.33	1.12	0.95	0.95	0.63	0.49	0.51	3.7	1.05	1.21	1.15	0	0	0	0	0.90218	1.35539	0.0143153
Tb927.8.6450	80.18	89.43	76.28	41.15	28.24	10.38	115.84	111.15	99.1	31.53	71.71	26.71	93.3	115.54	93.34	71.79	76.03	50.97	111.57	119.14	113.07	55.9	145.04	80.45	0.86	0.77	0.82	0.57	0.37	0.2	1.04	0.93	0.88	0.56	0.49	0.33	3.08	1.16	1.21	1.04	0	0	0	0	0.581053	1.5999	0.0164619
Tb927.11.6220	33.78	32.17	33.99	14.21	5.24	5.96	40.26	38.48	45.6	21.17	12.97	13.99	22.95	21.78	21.51	19.13	10.24	11.12	20.19	21.36	25.77	22.29	21.39	23.46	1.47	1.48	1.58	0.74	0.51	0.54	1.99	1.8	1.77	0.95	0.61	0.6	3.93	1.23	1.21	0.98	0	0	0	0	0.374569	2.21881	0.0130145
Tb927.10.720	98.53	93.72	90.9	54.66	29.36	32.22	75.66	78.97	114.45	48.13	31.07	37.92	21.33	20.49	21.12	23.19	22.27	25.57	15.05	13.46	22.43	17.47	20.42	22.37	4.62	4.57	4.3	2.36	1.32	1.26	5.03	5.87	5.1	2.76	1.52	1.7	2.44	1.19	1.21	1.02	0	0	0	0	0.556206	2.37613	0.013838
Tb927.10.5980	25.94	24.87	27.45	12.81	4.8	3.1	32.19	31.85	27.21	13.35	7.96	6.36	19.34	20.7	19.99	18.87	14.27	10.66	19.4	19.67	19.8	17.62	20.32	14.37	1.34	1.2	1.37	0.68	0.34	0.29	1.66	1.62	1.37	0.76	0.39	0.44	3.78	1.19	1.21	1.02	0	0	0	0	0.602454	2.93718	0.0134552
Tb927.10.840	43.54	39.22	31.64	8.41	8.15	4.76	31.31	27.98	65.47	4.42	12.37	7.58	13.03	11.43	10.04	7.67	7.67	7.05	10.16	7.74	19.76	5.18	8.26	6.97	3.34	3.43	3.15	1.1	1.06	0.68	3.08	3.61	3.31	0.85	1.5	1.09	5.37	1.01	1.21	1.2	0	0	0	0	0.987442	4.43329	0.0104499
Tb927.6.5050	63.33	71.86	66.51	47.42	48.86	37.21	77.59	88.48	71.44	63.27	86.51	62.97	24.49	29.81	28.93	24.45	28.05	22.42	29.35	30.49	29.44	27.93	40.29	31.75	2.59	2.41	2.3	1.94	1.74	1.66	2.64	2.9	2.43	2.27	2.15	1.98	1.51	1.09	1.2	1.1	0	0	0	0	0.800469	0.0504638	0.0497985
Tb927.11.13020	146.42	177.18	156.23	157.13	155.22	89.66	177.66	192.43	133.65	159.08	204.84	131.6	140.53	149.65	139.99	144.45	129.26	111.16	144.26	141.03	126.9	119.63	167.74	111.44	1.04	1.18	1.12	1.09	1.2	0.81	1.23	1.36	1.05	1.33	1.22	1.18	1.19	1.09	1.2	1.1	0	0	0	0	0.863187	0.206311	0.791704
Tb927.3.1070	61.8	57.77	54.2	69	62.3	44.43	66.51	59.55	53.61	72.2	64.11	57.74	1.16	1.63	1	1.44	1.8	0.8	1.38	0.82	0.74	1.32	1.06	1.13	53.28	35.44	54.2	47.92	34.61	55.54	48.2	72.62	72.45	54.7	60.48	51.1	0.99	1.35	1.2	0.89	0	0	0	0	0.739293	0.270321	0.397876
Tb927.10.150	18.8	17.4	16.45	14.38	10.34	6.82	22.99	24.32	20.06	11.27	25.29	10.74	3.44	3.05	3.23	2.88	2.38	1.55	3.68	4.07	3.82	2.34	3.6	2.31	5.47	5.7	5.09	4.99	4.34	4.4	6.25	5.98	5.25	4.82	7.03	4.65	1.67	1.08	1.2	1.11	0	0	0	0	0.83606	0.355793	0.730094
Tb11.02.5360	24.24	23.28	26.62	23.58	19.41	24.54	24.54	26.83	22.99	28.74	19.26	23.22	14.98	15.08	17.59	19.31	21.59	30.9	15.43	14.65	15.98	21.53	16.42	23.27	1.62	1.54	1.51	1.22	0.9	0.79	1.59	1.83	1.44	1.33	1.17	1	1.1	1.04	1.2	1.15	0	0	0	0	0.938633	0.365907	0.0490766
Tb927.2.2830	10.33	9.41	10.08	5.32	3.15	3.38	11.12	9.92	9.49	4.87	4.26	3.96	5.44	5.2	5.63	5.1	4.76	3.61	4.85	5.51	5.41	4.06	4.31	4	1.9	1.81	1.79	1.04	0.66	0.94	2.29	1.8	1.75	1.2	0.99	0.99	2.52	1.06	1.2	1.13	0	0	0	0	0.931059	0.370498	0.0328165
Tb927.1.2160	21.87	13.92	4.97	9.41	7.86	13.59	15.55	8.68	7.6	5.23	12.06	11.21	28.89	19.76	9.21	9.81	9.36	10.78	23.79	12.39	11.49	4.72	11.5	7.44	0.76	0.7	0.54	0.96	0.84	1.26	0.65	0.7	0.66	1.11	1.05	1.51	1.32	1.01	1.2	1.19	0	0	0	0	0.995138	0.407447	0.0706175
Tb927.7.5900	22.29	23.54	21.38	14.91	7.72	5.33	29.97	37.78	33.63	15.59	19.36	8.81	48.39	50.25	51.1	45.2	34.35	26.08	59.57	75.19	68.66	43.21	61.12	40.69	0.46	0.47	0.42	0.33	0.22	0.2	0.5	0.5	0.49	0.36	0.32	0.22	2.4	1.1	1.2	1.09	0	0	0	0	0.579164	0.541638	0.0510524
Tb927.4.2540	23.91	22.85	19.94	12.6	10	3.9	28.3	25.6	21.72	10.05	24.48	9.56	28.84	28.69	23.04	19.4	19.7	12.1	33.28	30	24.62	15.74	38.62	19.12	0.83	0.8	0.87	0.65	0.51	0.32	0.85	0.85	0.88	0.64	0.63	0.5	2.52	1.03	1.2	1.17	0	0	0	0	0.837345	0.614994	0.0320347
Tb927.7.1210	58.48	55.02	54.24	27.81	9.75	9.86	58.11	66.26	80.41	26.71	13.94	17.57	46.23	35.57	37.88	31.86	22.56	17.94	40.97	40.37	49.38	25.13	32.38	24.21	1.26	1.55	1.43	0.87	0.43	0.55	1.42	1.64	1.63	1.06	0.43	0.73	3.54	1.11	1.2	1.08	0	0	0	0	0.801261	0.800261	0.0418428
Tb927.10.13030	48.47	44.41	43.46	18.48	12.13	10.84	35.87	35.89	51.24	10.36	17.64	12.01	2.91	3.69	3.49	2.48	3.3	3.38	2.76	2.14	3.86	1.07	4.05	3.77	16.66	12.04	12.45	7.45	3.68	3.21	13	16.77	13.27	9.68	4.36	3.19	3.29	1.05	1.2	1.14	0	0	0	0	0.96877	0.943623	0.0391516
Tb927.7.7510	25.44	18.68	11.48	11.99	8.15	3.9	24.62	22.02	13.12	9.55	17.08	5.65	6.76	4.08	3.27	4.75	4.08	2.18	4.39	3.79	2.78	3.45	5.63	3.16	3.76	4.58	3.51	2.52	2	1.79	5.61	5.81	4.72	2.77	3.03	1.79	2.31	1.36	1.2	0.88	0	0	0	0	0.453996	1.23484	0.0157777
Tb927.1.4300	13.57	12.28	8.68	3.92	1.75	0.86	20.65	23.37	28.58	2.39	4.71	4.1	30.67	23.19	19.46	14.12	16.55	11.64	32.48	32.02	47.38	12.59	27.72	21.95	0.44	0.53	0.45	0.28	0.11	0.07	0.64	0.73	0.6	0.19	0.17	0.19	5.29	1.39	1.2	0.86	0	0	0	0	0.376659	2.04514	0.0160435
Tb927.8.3240	49.97	57.51	53.37	30.34	14.7	14.45	60.28	66.75	68.1	36.61	23.11	23.69	21.25	21.82	20.12	23.1	31.25	41.51	19.19	21.65	22.73	29.65	33.6	37.63	2.35	2.64	2.65	1.31	0.47	0.35	3.14	3.08	3	1.23	0.69	0.63	2.7	1.21	1.2	0.99	0	0	0	0	0.374468	2.10517	0.0162143
Tb927.11.500	33.37	16.24	5.98	7.19	3.88	2.47	31.52	18.72	15.61	5.84	10.44	5.56	380.82	180.23	64.85	124.18	119.32	165.22	345.59	200.29	157.38	114.65	269	193.77	0.09	0.09	0.09	0.06	0.03	0.01	0.09	0.09	0.1	0.05	0.04	0.03	4.11	1.04	1.2	1.15	0	0	0	0	0.869902	3.03652	0.0138883
Tb927.4.5335	14.86	14.69	13.4	12.42	12.91	11.47	14.97	17.16	13.01	15.28	20.93	16.16	30.01	29.34	30.42	25.32	25.72	21.21	29.22	32.88	26.88	27.06	33.04	25.67	0.5	0.5	0.44	0.49	0.5	0.54	0.51	0.52	0.48	0.56	0.63	0.63	1.17	1.05	1.19	1.13	0	0	0	0	0.863771	0.0432201	0.0389998
Tb927.5.1730	56.94	91.45	76.76	36.13	36.97	30.21	72.15	97.99	84.34	34.17	65.22	42.53	25.77	37.58	34.26	16.08	19.26	15.94	24.58	37.45	35.03	14.37	23.31	20.87	2.21	2.43	2.24	2.25	1.92	1.9	2.94	2.62	2.41	2.38	2.8	2.04	2.18	1.16	1.19	1.03	0	0	0	0	0.671241	0.225369	0.421745
Tb927.9.7480	47.19	43.08	42.59	24.58	19.17	17.6	39.25	34.57	42.6	16.45	20.42	18.51	14.53	15.33	14.23	13.21	13.34	14.05	10.58	9.42	15.2	8.73	10.64	11.35	3.25	2.81	2.99	1.86	1.44	1.25	3.71	3.67	2.8	1.88	1.92	1.63	2.17	1.12	1.19	1.06	0	0	0	0	0.843861	0.335944	0.0348464
Tb927.7.7090	103.8	100.51	63.23	53.66	60.6	33.54	128.92	110.78	103.84	51.74	146.1	72.11	68.85	72.07	47.22	43.54	54.93	41.97	74.66	71.73	63.77	46.97	95.68	65.7	1.51	1.39	1.34	1.23	1.1	0.8	1.73	1.54	1.63	1.1	1.53	1.1	1.81	1.16	1.19	1.03	0	0	0	0	0.457212	0.396579	0.109501
Tb927.10.2340	15.36	13.36	12.44	9.94	8.15	5.45	19.31	18.89	13.38	11.32	12.42	9.28	32.37	30.11	25.05	27.33	28.29	23.45	36.74	36.91	30.29	26	41.15	29.77	0.47	0.44	0.5	0.36	0.29	0.23	0.53	0.51	0.44	0.44	0.3	0.31	1.75	1.05	1.19	1.13	0	0	0	0	0.902138	0.451864	0.0758402
Tb927.5.3890	67.65	79.12	77.63	64.99	52.11	51.14	63.08	80.78	71.63	57.38	58.99	47.01	14.86	19.29	18.94	17.09	19.46	22.01	12.33	15.64	14.12	14.17	17.13	16.01	4.55	4.1	4.1	3.8	2.68	2.32	5.12	5.16	5.07	4.05	3.44	2.94	1.33	1.2	1.19	0.99	0	0	0	0	0.395874	0.490067	0.0453198
Tb927.8.5890	53.5	54.85	57.65	65.99	55.41	34.17	63.37	63.29	51.42	64.03	74.75	46.77	4.07	4.64	5.19	6.02	5.68	5.1	4.26	4.49	4.37	4.06	9.38	5.32	13.14	11.82	11.11	10.96	9.76	6.7	14.88	14.1	11.77	15.77	7.97	8.79	1.07	1.13	1.19	1.05	0	0	0	0	0.799308	0.601907	0.400193
Tb927.4.3050	11.12	9.15	7.99	6.32	7.47	5.73	11.12	7.2	9.05	3.81	6.18	5.32	4.57	2.62	2.23	1.44	0.82	0.8	4.26	2.55	3.15	0.66	0.46	0.99	2.43	3.49	3.58	4.39	9.11	7.16	2.61	2.82	2.87	5.77	13.43	5.37	1.45	0.87	1.19	1.37	0	0	0	0	0.861035	0.738793	0.186993
Tb927.9.4350	114.59	99.09	90.24	72.05	65.26	59.91	119.56	119.47	146.77	77.03	89.5	87.28	5.64	4.25	3.93	6.89	9.12	10.49	5.1	4.12	6.64	7.77	8.87	11.12	20.32	23.32	22.96	10.46	7.16	5.71	23.44	29	22.1	9.91	10.09	7.85	1.54	1.12	1.19	1.06	0	0	0	0	0.844838	0.777285	0.0212507
Tb927.11.14540	15.81	13.96	11.26	7.54	2.13	1.55	20.78	19.71	18.54	5.18	6.28	2.68	7.84	6.06	5.19	5.01	3.01	2.69	7.4	7.28	7.27	3.3	5.98	3.77	2.02	2.3	2.17	1.5	0.71	0.58	2.81	2.71	2.55	1.57	1.05	0.71	3.66	1.24	1.19	0.96	0	0	0	0	0.289899	1.02678	0.0269491
Tb927.5.3560	45.49	52.66	52.67	15.74	8.05	5.16	63.29	84.24	86.42	27.42	36.54	25.53	32.79	40.89	41.46	15.6	11.55	9.86	38.25	49.01	55.76	25.29	43.23	34.9	1.39	1.29	1.27	1.01	0.7	0.52	1.65	1.72	1.55	1.08	0.85	0.73	5.21	1.25	1.19	0.95	0	0	0	0	0.278586	1.08058	0.0185943
Tb927.8.5010	210.33	267.04	281.56	195.01	199.86	223.7	278.7	314.04	270.71	248.75	203.73	299.65	5.93	7.22	6.85	6.28	9.32	11.41	4.81	6.13	5.78	7.41	8.77	10.46	35.47	36.99	41.1	31.05	21.44	19.61	57.94	51.23	46.84	33.57	23.23	28.65	1.23	1.37	1.19	0.87	0	0	0	0	0.420793	1.08872	0.0165912
Tb927.7.1240	49.47	49.14	45.21	21.31	5.05	3.33	64.17	75.31	87.12	23.66	13.43	14.41	31.87	32.04	29.46	23.1	17.81	13.3	32.86	39.18	45.19	27.67	34.21	29.91	1.55	1.53	1.53	0.92	0.28	0.25	1.95	1.92	1.93	0.86	0.39	0.48	4.84	1.26	1.19	0.94	0	0	0	0	0.0185561	1.42912	0.020917
Tb927.3.1200	34.78	32.09	31.2	21.75	11.5	10.2	35.11	38.15	41.67	22.95	16.67	19.26	66.11	62.8	60.4	64.55	58.86	56.64	70.27	72.92	71.33	67.58	72.93	65.42	0.53	0.51	0.52	0.34	0.2	0.18	0.5	0.52	0.58	0.34	0.23	0.29	2.26	1.03	1.19	1.16	0	0	0	0	0.938805	1.66911	0.0150862
Tb927.3.3340	55.65	48.92	46.87	8.11	2.62	1.38	54.55	51.32	72	5.79	5.32	3.2	66.69	57.43	56.69	36.26	28.43	27.86	54.97	50.04	74.48	25.95	46.62	31.89	0.83	0.85	0.83	0.22	0.09	0.05	0.99	1.03	0.97	0.22	0.11	0.1	12.51	1.19	1.19	1	0	0	0	0	0.259061	18.2224	0.00994229
Tb927.5.3170	52.75	63.83	83.39	15.65	7.91	6.99	34.32	35.47	55.28	7.97	6.08	6.83	53.91	65.72	77.41	43.59	50.75	41.51	28.51	29.75	52.83	23.41	23.11	31.75	0.98	0.97	1.08	0.36	0.16	0.17	1.2	1.19	1.05	0.34	0.26	0.22	6.55	1.14	1.19	1.04	0	0	0	0	0.59341	24.5412	0.00927284
Tb927.11.16710	32.21	40.46	33.69	35.26	33.43	29.35	34.4	40.37	30.51	40.32	30.81	31.23	31.13	40.85	34.52	38.36	43.28	43.46	31.85	39.55	27.14	36.41	35.22	38.1	1.03	0.99	0.98	0.92	0.77	0.68	1.08	1.02	1.12	1.11	0.87	0.82	1.08	1.07	1.18	1.1	0	0	0	0	0.639812	0.294721	0.268166
Tb927.10.7090	20.54	10.01	3.62	4.97	4.46	2.52	36.95	30.08	18.57	10.36	19.46	9.09	47.64	24.23	8.38	17.83	12.57	7.34	79.55	67.2	42.56	24.52	72.17	20.39	0.43	0.41	0.43	0.28	0.35	0.34	0.46	0.45	0.44	0.42	0.27	0.45	2.86	1.06	1.18	1.11	0	0	0	0	0.459407	0.439865	0.348777
Tb927.5.810	39.51	32.09	23.91	10.98	14.85	18	58.32	56.26	62.99	19.4	41.2	38.57	152.98	121.86	78.9	47.21	48.86	50.22	190.41	161.48	202.23	47.53	167.54	99.38	0.26	0.26	0.3	0.23	0.3	0.36	0.31	0.35	0.31	0.41	0.25	0.39	2.18	1.18	1.18	1	0	0	0	0	0.501104	0.453759	0.663489
Tb927.9.11600	133.6	159.78	108.31	56.36	39.16	19.26	148.69	170.21	112.78	44.58	60.76	32.45	173.44	213.09	141.21	89.31	75.84	40.7	168.88	184.53	122.82	56.06	132.32	49.88	0.77	0.75	0.77	0.63	0.52	0.47	0.88	0.92	0.92	0.8	0.46	0.65	3.5	1.19	1.18	0.99	0	0	0	0	0.187067	0.489773	0.119821
Tb927.11.4220	49.72	56.27	47.83	49.21	46.97	46.38	50.62	48.89	43.45	62	39.88	47.85	17.6	18.56	16.28	18.66	19.85	19.89	12.25	14.4	13.2	15.79	18.95	18.27	2.83	3.03	2.94	2.64	2.37	2.33	4.13	3.4	3.29	3.93	2.1	2.62	1.08	1.23	1.18	0.96	0	0	0	0	0.655193	0.530121	0.334466
Tb927.9.3390	43.83	41.58	40.93	32.12	24.6	15.08	53.97	50.54	48.16	25.79	39.58	25.34	34.32	33.8	30.68	34.52	33.63	30.67	38.92	39.38	32.44	35.49	36.89	34.29	1.28	1.23	1.33	0.93	0.73	0.49	1.39	1.28	1.48	0.73	1.07	0.74	1.76	1.08	1.18	1.09	0	0	0	0	0.768191	0.683608	0.0332271
Tb927.11.11080	154.31	120.1	117.26	85.13	58.13	51.77	111.36	92.92	151.89	67.07	55.8	55.95	0.66	0.69	0.65	1	1.12	0.86	0.29	0.49	0.67	0.46	1.37	1.22	233.8	174.06	180.4	85.13	51.9	60.2	384	189.63	226.7	145.8	40.73	45.86	2.01	1.36	1.18	0.87	0	0	0	0	0.849219	0.889411	0.0760096
Tb927.10.5940	67.48	73.49	72.48	40.19	26.74	26.49	82.06	79.92	80.41	53.57	30.86	35.42	23.61	24.14	24.87	19.61	21.3	21.56	23.62	23.79	26.32	24.02	18.19	24.59	2.86	3.04	2.91	2.05	1.26	1.23	3.47	3.36	3.06	2.23	1.7	1.44	2.28	1.12	1.18	1.05	0	0	0	0	0.572553	0.953322	0.0203121
Tb927.11.13740	63.58	54.81	62.01	18.52	7.38	8.26	47.78	48.52	68.18	19.7	6.39	9.99	12.78	11.38	12.79	6.45	5.58	7.28	8.4	8.35	11.31	7.26	3.6	5.65	4.97	4.82	4.85	2.87	1.32	1.13	5.69	5.81	6.03	2.71	1.78	1.77	5.28	1.2	1.18	0.98	0	0	0	0	0.221639	2.52116	0.0143389
Tb927.8.6640	79.06	69.15	74.93	23.06	7.08	4.93	49.87	41.93	63.17	11.58	9.73	7.44	67.28	58.63	61.36	46.16	34.11	23.96	40.59	33.54	50.38	24.93	27.42	26.61	1.18	1.18	1.22	0.5	0.21	0.21	1.23	1.25	1.25	0.46	0.35	0.28	6.36	1.04	1.18	1.13	0	0	0	0	0.461988	2.83548	0.0137812
Tb927.9.2891	56.28	48.02	40.19	11.46	3.35	1.95	67.55	61.03	71.89	5.18	10.19	3.96	13.32	10.74	9.86	5.58	2.96	2.12	13.46	12.26	16.68	2.64	5.88	3.49	4.23	4.47	4.08	2.05	1.13	0.92	5.02	4.98	4.31	1.96	1.73	1.13	8.62	1.12	1.18	1.05	0	0	0	0	0.697958	8.56476	0.0105055
Tb927.6.3270	25.36	21.56	18.11	9.5	2.47	1.15	30.01	29.01	26.4	4.37	11.76	3.3	22.95	23.19	16.98	12.86	7.62	5.45	23.79	23.46	20.39	8.99	20.47	7.54	1.11	0.93	1.07	0.74	0.32	0.21	1.26	1.24	1.29	0.49	0.57	0.44	4.96	1.22	1.18	0.97	0	0	0	0	0.460344	9.24648	0.0106468
Tb927.4.4040	66.49	68.6	47.44	26.11	15.14	6.82	81.1	79.67	70.77	22.7	34.46	20.02	71.3	76.54	53.15	45.55	40.81	20.47	69.73	64.53	64.14	40.62	71.35	43.9	0.93	0.9	0.89	0.57	0.37	0.33	1.16	1.23	1.1	0.56	0.48	0.46	3.8	1.28	1.18	0.92	0	0	0	0	0.342413	18.48	0.00932825
Tb927.10.870	61.17	64.6	55.55	15.65	6.02	5.1	81.72	87.99	113.74	22.09	20.47	14.65	12.66	14.95	12.44	8.33	5.97	4.19	14.76	14.73	20.91	10.92	14.09	10.74	4.83	4.32	4.47	1.88	1.01	1.22	5.54	5.97	5.44	2.02	1.45	1.36	6.77	1.24	1.18	0.95	0	0	0	0	0.278494	31.744	0.00919694
Tb927.10.8890	27.89	22.72	18.11	8.28	7.91	4.19	36.58	34.16	39.33	8.78	24.58	11.96	82.3	67.09	56.38	23.1	19.21	12.04	89.42	76.26	90.53	18.94	53.11	30.47	0.34	0.34	0.32	0.36	0.41	0.35	0.41	0.45	0.43	0.46	0.46	0.39	3.37	1.29	1.17	0.91	0	0	0	0	0.227254	0.10496	0.819643
Tb927.5.2030	105.79	131.99	138.55	122.26	174.15	179.38	123.86	163.13	146.25	168.57	159.18	202.29	72.79	88.61	96.48	103	141.98	177.66	76.96	92.59	90.53	119.98	120.56	154.35	1.45	1.49	1.44	1.19	1.23	1.01	1.61	1.76	1.62	1.4	1.32	1.31	0.79	1.14	1.17	1.03	0	0	0	0	0.458072	0.178981	0.0190964
Tb927.10.1290	8.13	8.38	8.25	8.89	9.27	11.12	10.07	9.92	6.9	11.53	9.83	11.4	11.62	14.39	13.96	16.87	19.94	21.73	13.17	13.79	9.82	17.06	20.02	19.26	0.7	0.58	0.59	0.53	0.46	0.51	0.76	0.72	0.7	0.68	0.49	0.59	0.85	1.17	1.17	1	0	0	0	0	0.613579	0.276071	0.125873
Tb927.5.3490	18.59	24.18	30.72	22.06	27.51	35.14	24.25	37.86	30.4	30.62	34.51	39.7	2.66	3.39	4.58	4.58	6.45	9.12	3.3	5.39	3.86	5.08	8.36	8.01	6.99	7.13	6.71	4.82	4.27	3.85	7.35	7.02	7.88	6.03	4.13	4.96	0.87	1.07	1.17	1.09	0	0	0	0	0.754758	0.419497	0.0429573
Tb927.10.1830	39.8	38.01	36.09	49.08	43.28	36.92	36.66	37.12	26.54	43.11	37.1	29.91	1.95	2.23	2.09	2.83	3.49	3.67	1.63	1.89	1.82	2.64	2.48	1.98	20.41	17.04	17.27	17.34	12.4	10.06	22.49	19.64	14.58	16.33	14.96	15.11	0.88	1.04	1.17	1.13	0	0	0	0	0.974862	0.434259	0.287342
Tb927.7.2260	27.81	32.09	30.55	25.76	23.29	23.62	27.84	26.26	23.88	24.17	22.7	19.36	7.39	7.3	6.81	8.76	9.9	9.75	4.97	5.56	5.6	6.6	7.65	8.1	3.76	4.4	4.49	2.94	2.35	2.42	5.6	4.72	4.26	3.66	2.97	2.39	1.24	1.15	1.17	1.02	0	0	0	0	0.802169	0.501208	0.0359466
Tb927.6.4810	16.97	20.02	18.02	5.93	3.2	2.29	20.32	21.36	19.65	6.14	5.47	3.44	29.26	34.36	31.29	16.08	10.24	7.22	35.49	38.44	37.37	11.83	15.36	11.68	0.58	0.58	0.58	0.37	0.31	0.32	0.57	0.56	0.53	0.52	0.36	0.29	4.82	0.95	1.17	1.23	0	0	0	0	0.716162	0.54009	0.146322
Tb927.7.2610	31.21	32.21	32.6	18.92	11.65	12.15	38.58	39.88	43.52	26.81	22.4	20.11	7.39	6.83	7.11	5.1	5.73	5.56	5.77	7.98	7.9	8.28	7.35	6.74	4.22	4.72	4.59	3.71	2.03	2.19	6.69	5	5.51	3.24	3.05	2.98	2.25	1.27	1.17	0.92	0	0	0	0	0.672703	0.643954	0.0411458
Tb927.6.2030	1.66	1.55	1.27	2.96	3.93	9.12	13.08	19.84	18.17	5.08	4.56	6.74	27.39	19.24	16.67	14.6	17.42	26.08	36.29	44.2	50.09	13	29.24	18.93	0.06	0.08	0.08	0.2	0.23	0.35	0.36	0.45	0.36	0.39	0.16	0.36	0.28	5.32	1.17	0.22	1	0	0	0	0.272235	0.666759	0.370269
Tb927.10.5560	55.28	54.16	55.51	34.83	22.08	17.43	57.35	52.92	58.09	35.64	24.68	21.52	10.67	11.17	11.61	10.07	9.03	7.74	9.28	8.44	9.38	9.24	10.59	6.41	5.18	4.85	4.78	3.46	2.45	2.25	6.18	6.27	6.19	3.86	2.33	3.36	2.22	1.26	1.17	0.93	0	0	0	0	0.275844	0.69282	0.0307122
Tb927.10.10050	71.09	63.23	58.13	16.96	5.19	7.97	91.17	80.29	141.14	40.82	12.67	13.19	15.07	14.3	12.48	3.36	2.38	3.27	19.19	17.08	28.32	6.8	4.71	4.99	4.72	4.42	4.66	5.05	2.18	2.44	4.75	4.7	4.98	6	2.69	2.64	6.39	1.05	1.17	1.11	0	0	0	0	0.736171	0.74051	0.463026
Tb927.10.10190	70.55	75.64	80.64	50.91	34.21	39.44	99.99	79.84	121.67	66.46	30.36	36.36	12.62	14.56	12.92	15.17	19.51	21.9	18.77	13.29	22.61	15.54	13.99	21.95	5.59	5.2	6.24	3.36	1.75	1.8	5.33	6.01	5.38	4.28	2.17	1.66	1.82	0.98	1.17	1.19	0	0	0	0	0.971435	0.818792	0.0713688
Tb927.2.2360	19.96	19.46	18.42	12.38	7.38	8.31	35.78	47.2	42.82	32.24	21.18	28.82	8.96	9.66	8.9	9.11	9.12	10.15	15.01	17.28	15.9	19.9	24.43	28.21	2.23	2.01	2.07	1.36	0.81	0.82	2.38	2.73	2.69	1.62	0.87	1.02	2.06	1.24	1.17	0.94	0	0	0	0	0.396608	1.05747	0.0222879
Tb927.11.15140	51.55	51.07	42.59	38.97	27.03	20.75	58.15	69.22	60.21	45.49	35.83	32.69	31.54	31.87	27.75	35.96	36.59	38.12	30.85	36.79	35.81	38.44	43.74	42.34	1.63	1.6	1.53	1.08	0.74	0.54	1.88	1.88	1.68	1.18	0.82	0.77	1.67	1.14	1.17	1.03	0	0	0	0	0.513714	1.17568	0.0191296
Tb927.11.15860	202.2	202.05	205.14	107.36	55.65	39.56	161.32	159.43	201.72	85.3	48.5	48.8	132.56	136.29	139.95	135.91	140.03	99.7	99.16	92.84	140.36	94.54	95.43	108.33	1.53	1.48	1.47	0.79	0.4	0.4	1.63	1.72	1.44	0.9	0.51	0.45	3.01	1.07	1.17	1.09	0	0	0	0	0.843193	1.59792	0.0183243
Tb927.10.5970	12.82	14.78	14.4	5.93	1.8	1.09	17.93	23.42	20.54	5.89	2.64	2.64	9.5	9.28	9.34	10.42	9.46	13.01	11.08	11.48	13.12	10.46	13.13	11.87	1.35	1.59	1.54	0.57	0.19	0.08	1.62	2.04	1.57	0.56	0.2	0.22	4.76	1.17	1.17	1	0	0	0	0	0.790934	4.77465	0.0123805
Tb927.7.7530	79.73	55.19	63.67	23.06	8.64	7.62	72.36	58.73	93.54	17.06	13.58	12.72	13.45	9.97	10.82	8.02	6.55	7.68	10.12	9.18	14.68	5.99	9.12	7.39	5.93	5.54	5.88	2.88	1.32	0.99	7.15	6.4	6.37	2.85	1.49	1.72	5.05	1.15	1.17	1.02	0	0	0	0	0.512812	4.82813	0.0116913
Tb927.8.1280	25.07	26.85	25.53	6.32	2.81	1.61	37.79	48.89	78.52	7.21	7.4	7.49	20.38	20.92	19.81	17.61	18.78	17.89	27.97	35.72	54.72	24.88	37.55	34.95	1.23	1.28	1.29	0.36	0.15	0.09	1.35	1.37	1.43	0.29	0.2	0.21	7.21	1.09	1.17	1.07	0	0	0	0	0.373325	1249.45	0.0145493
Tb927.10.11920	58.27	52.27	56.21	95.72	106.31	106.46	43.18	45.23	29.7	82	87.06	72.67	16.14	13.7	15.58	32.86	36.39	40.07	11.83	11.03	6.56	22.85	27.47	23.41	3.61	3.82	3.61	2.91	2.92	2.66	3.65	4.1	4.53	3.59	3.17	3.1	0.54	1.11	1.16	1.05	0	0	0	0	0.796961	0.0883595	0.0760117
Tb927.1.4100	222.74	226.19	218.63	84.73	73.85	67.88	340.82	331.69	390.09	97.39	201.9	166.54	194.06	190.15	182.45	80.11	59.73	52.4	207.68	202.68	242.9	75.55	155.89	104.47	1.15	1.19	1.2	1.06	1.24	1.3	1.64	1.64	1.61	1.29	1.3	1.59	2.95	1.38	1.16	0.84	0	0	0	0	0.0454979	0.211224	0.148263
Tb927.2.3420	32.54	31.48	23.65	22.32	25.86	13.01	35.49	27.65	29.07	18.38	38.01	23.64	7.01	7.34	5.5	7.24	7.13	5.04	7.82	5.93	6.97	4.62	10.03	7.91	4.64	4.29	4.3	3.08	3.63	2.58	4.54	4.66	4.17	3.98	3.79	2.99	1.43	1.01	1.16	1.15	0	0	0	0	0.974901	0.35689	0.0954799
Tb927.11.13450	58.19	55.88	49.09	44.94	36.68	21.61	55.51	53.17	51.64	32.65	42.92	27.13	13.82	13.14	10.56	14.08	13	8.31	12.12	11.44	10.64	8.28	13.02	9.75	4.21	4.25	4.65	3.19	2.82	2.6	4.58	4.65	4.85	3.94	3.3	2.78	1.58	1.07	1.16	1.08	0	0	0	0	0.679777	0.361937	0.0594099
Tb927.8.6400	36.31	33.33	32.07	33.61	31.05	26.66	28.22	23.75	25.25	23.1	24.22	20.87	5.93	4.17	4.23	6.58	7.13	7.34	3.14	3.46	3.6	3.91	5.27	4.52	6.12	7.99	7.58	5.11	4.35	3.63	8.99	6.86	7.01	5.91	4.6	4.62	1.11	1.05	1.16	1.1	0	0	0	0	0.953048	0.401459	0.0525452
Tb927.9.15470	83.79	63.36	46.61	29.51	20.86	17.2	73.99	56.59	76.63	20.01	29.24	23.5	19.71	14.65	10.95	8.37	5.05	5.22	15.38	12.92	18.91	3.76	7.4	6.78	4.25	4.32	4.26	3.53	4.13	3.3	4.81	4.38	4.05	5.32	3.95	3.47	2.87	1.03	1.16	1.13	0	0	0	0	0.933733	0.408813	0.806309
Tb927.10.10445	51.79	55.24	66.11	65.16	74.19	74.01	69.39	77.24	59.24	94.64	74.8	87.61	3.11	4.12	4.58	3.09	5.05	4.13	6.23	6.21	5.19	3.86	4.16	4.43	16.65	13.41	14.43	21.09	14.69	17.92	11.14	12.44	11.41	24.52	17.98	19.78	0.81	0.79	1.16	1.47	0	0	0	0	0.525444	0.435708	0.0482149
Tb927.7.4960	34.7	31.05	28.63	33.87	31.73	30.27	35.62	34.77	32.59	35.9	31.01	30.05	0.95	1.12	1.05	1.96	3.06	2.12	1.3	0.99	1.41	1.93	2.23	1.84	36.53	27.72	27.27	17.28	10.37	14.28	27.4	35.12	23.11	18.6	13.91	16.33	0.98	0.94	1.16	1.23	0	0	0	0	0.953906	0.471467	0.06867
Tb927.8.3260	18.43	18.47	17.28	20.05	20.14	14.62	21.99	24.49	18.65	30.82	26.35	23.22	12.04	13.7	12.04	16.21	18	17.49	12.79	14.94	10.71	18.74	25.44	22.51	1.53	1.35	1.44	1.24	1.12	0.84	1.72	1.64	1.74	1.64	1.04	1.03	0.99	1.18	1.16	0.98	0	0	0	0	0.370488	0.559454	0.157642
Tb927.4.4790	10.25	9.06	9.56	4.49	1.8	1.95	31.23	35.39	32.03	23.71	24.38	23.69	0.91	0.9	1.09	0.83	0.39	0.4	3.14	3.42	3.93	3.35	5.47	4.14	11.26	10.07	8.77	5.41	4.62	4.88	9.95	10.35	8.15	7.08	4.46	5.72	3.5	0.95	1.16	1.22	0	0	0	0	0.934716	0.595116	0.0314133
Tb927.10.5250	4.9	3.65	2.27	3.14	1.8	2.18	31.06	40.04	27.21	9.49	21.03	12.06	6.23	5.07	3.05	3.53	3.54	4.24	37.92	47	28.58	10.05	38.16	16.58	0.79	0.72	0.74	0.89	0.51	0.51	0.82	0.85	0.95	0.94	0.55	0.73	1.52	1.16	1.16	1	0	0	0	0	0.538196	0.596004	0.373214
Tb927.9.15100	42.17	34.53	34.04	26.37	11.06	10.2	46.9	47.12	36.7	17.21	28.43	12.39	3.65	3.31	3.32	2.44	1.5	0.97	3.85	3.91	3.15	1.73	4.21	0.75	11.55	10.43	10.25	10.81	7.37	10.52	12.18	12.05	11.65	9.95	6.75	16.52	2.33	1.11	1.16	1.05	0	0	0	0	0.572017	0.668732	0.79364
Tb927.7.980	63.54	58.59	58.21	47.77	32.7	36	83.19	70.78	80.49	68.75	40.95	51.01	21.79	22.77	21.47	26.5	25.77	28.32	28.55	29.47	27.58	28.89	40.09	31.42	2.92	2.57	2.71	1.8	1.27	1.27	2.91	2.4	2.92	2.38	1.02	1.62	1.55	1	1.16	1.16	0	0	0	0	0.994777	0.710981	0.107485
Tb927.4.3340	33.82	33.25	32.03	28.68	18.05	22.42	61.99	65.89	57.06	60.68	29.49	35.14	9.96	10.74	11.13	12.86	10.77	16.11	14.97	17.9	19.5	20.77	17.59	22.51	3.4	3.1	2.88	2.23	1.68	1.39	4.14	3.68	2.93	2.92	1.68	1.56	1.43	1.15	1.16	1.01	0	0	0	0	0.836862	0.716318	0.0648245
Tb927.11.10010	57.27	58.37	61.97	41.76	22.85	20.75	67.51	74.49	70.81	49.86	27.06	28.12	47.11	50.56	50.18	53.26	50.12	48.56	48.7	53.62	52.83	56.97	52.3	53.03	1.22	1.15	1.23	0.78	0.46	0.43	1.39	1.39	1.34	0.88	0.52	0.53	2.08	1.14	1.16	1.02	0	0	0	0	0.276259	0.878839	0.0330991
Tb927.5.650	14.57	11.81	11.74	7.1	3.88	3.38	18.48	16.5	21.24	9.49	2.89	5.23	14.53	10.61	11.48	9.89	7.28	7.11	9.15	7.94	11.31	9.09	7.6	8.81	1	1.11	1.02	0.72	0.53	0.48	2.02	2.08	1.88	1.04	0.38	0.59	2.65	1.91	1.16	0.61	0	0	0	0	0.112033	1.15268	0.024553
Tb927.9.11810	40.84	45.1	36.57	27.77	18.34	19.26	54.26	62.39	56.09	41.53	29.8	30.05	9.63	9.58	8.64	9.63	8.83	10.15	9.82	12.02	12.05	12.74	13.28	12.06	4.24	4.71	4.23	2.88	2.08	1.9	5.53	5.19	4.65	3.26	2.24	2.49	1.87	1.17	1.16	0.99	0	0	0	0	0.577604	1.59493	0.0145311
Tb927.8.8130	19.42	19.5	20.73	7.93	2.23	2.41	30.22	32.72	45.19	8.43	4.46	4.14	24.03	21.95	22.52	21.88	14.65	13.53	26.46	29.51	41.93	21.63	19.76	22.7	0.81	0.89	0.92	0.36	0.15	0.18	1.14	1.11	1.08	0.39	0.23	0.18	4.75	1.27	1.16	0.91	0	0	0	0	0.278616	2.89518	0.0141033
Tb927.6.3040	39.05	38.83	35.87	19.53	12.66	13.19	43.22	43.91	42.15	16.04	21.59	16.96	23.2	24.87	23.96	18.87	23	27.23	22.28	22.68	25.14	17.16	25.74	27.41	1.68	1.56	1.5	1.03	0.55	0.48	1.94	1.94	1.68	0.93	0.84	0.62	2.51	1.17	1.16	0.99	0	0	0	0	0.53627	5.6933	0.0105801
Tb927.11.1070	109.15	98.66	107.39	41.06	12.81	12.38	110.65	119.18	123.64	37.98	20.68	17.94	91.39	83.24	86.1	70.35	50.32	55.21	80.72	73.91	89.9	65.3	65.17	55.25	1.19	1.19	1.25	0.58	0.25	0.22	1.37	1.61	1.38	0.58	0.32	0.32	4.76	1.2	1.16	0.97	0	0	0	0	0.574244	8.43846	0.0106059
Tb927.11.6370	89.48	86.72	91.99	48.99	25.52	20.7	87.45	89.88	100.84	43.77	29.65	30.24	14.03	13.27	13.31	11.68	10.04	10.15	12.62	12.43	13.31	11.37	10.08	8.85	6.38	6.54	6.91	4.19	2.54	2.04	6.93	7.23	7.58	3.85	2.94	3.42	2.82	1.1	1.16	1.05	0	0	0	0	0.518349	10.9879	0.00991368
Tb927.8.6070	78.61	68.81	68.6	23.97	8.73	7.8	86.99	88.68	128.68	18.79	17.33	13.23	29.84	25.64	25.05	21.92	17.71	18.98	23.33	23.42	30.77	17.72	27.26	21.52	2.63	2.68	2.74	1.09	0.49	0.41	3.73	3.79	4.18	1.06	0.64	0.61	5.33	1.45	1.16	0.8	0	0	0	0	0.307973	78.5146	0.011458
Tb927.4.5170	32.33	33.5	30.46	50.52	54.93	50.45	35.03	35.6	27.14	62.3	59.04	53.03	8.72	8.2	7.81	11.77	12.23	12.84	8.11	9.88	6.56	12.44	12.42	10.79	3.71	4.09	3.9	4.29	4.49	3.93	4.32	3.6	4.14	5.01	4.75	4.91	0.62	1.03	1.15	1.12	0	0	0	0	0.942434	0.0491168	0.0542036
Tb927.8.1750	79.31	83.93	78.51	73.18	93.89	89.61	107.81	102.14	81.49	88.09	168.61	120.53	13.07	14	12.83	13.34	16.79	15.48	18.02	15.72	14.35	14.57	23.92	19.08	6.07	6	6.12	5.49	5.59	5.79	5.98	6.5	5.68	6.05	7.05	6.32	0.94	1	1.15	1.15	0	0	0	0	0.994921	0.0980924	0.350404
Tb927.5.1050	32.87	33.5	32.73	15.04	15.53	21.9	30.06	40.37	44.9	14.93	27.47	30.85	116.33	128.6	126.81	64.34	67.3	86.91	93.3	117.33	142.62	51.33	115.7	104.66	0.28	0.26	0.26	0.23	0.23	0.25	0.32	0.34	0.31	0.29	0.24	0.29	1.89	1.21	1.15	0.95	0	0	0	0	0.27644	0.167097	0.0864247
Tb927.9.4920	27.47	27.92	28.67	36.4	38.82	29.41	28.18	30.04	22.99	40.21	46.88	37.26	0.95	0.9	1.09	1.22	1.55	1.43	1.25	1.03	0.89	1.42	1.57	1.32	28.92	31.02	26.3	29.84	25.05	20.57	22.54	29.17	25.83	28.32	29.86	28.23	0.8	0.9	1.15	1.28	0	0	0	0	0.821114	0.320716	0.272681
Tb927.10.8720	156.8	131.26	136.11	93.06	90.25	79.34	163.53	141.11	177.99	99.87	136.78	125.85	141.02	114.6	113.81	116.81	136.06	114.77	131.85	111.94	146.11	132.32	158.77	145.58	1.11	1.15	1.2	0.8	0.66	0.69	1.24	1.26	1.22	0.75	0.86	0.86	1.61	1.08	1.15	1.06	0	0	0	0	0.519774	0.457787	0.0150356
Tb927.6.4130	92.8	105.06	93.39	89.66	113.25	128.93	102.12	102.72	77.97	87.64	174.69	134.09	121.19	142.95	125.68	126.53	136.15	115.86	133.56	137.25	108.33	115.67	155.23	114.69	0.77	0.73	0.74	0.71	0.83	1.11	0.76	0.75	0.72	0.76	1.13	1.17	0.88	1	1.15	1.15	0	0	0	0	0.983573	0.517047	0.179286
Tb927.7.2230	38.93	32.43	31.73	11.64	4.56	2.81	31.14	23.87	28.92	6.04	5.42	4.29	17.35	12.93	15.14	8.46	3.54	2.29	13.59	10.29	13.27	3.35	4.92	2.73	2.24	2.51	2.1	1.38	1.29	1.23	2.29	2.32	2.18	1.8	1.1	1.57	5.42	0.99	1.15	1.16	0	0	0	0	0.987645	0.53441	0.0690267
Tb927.2.4700	23.45	19.63	10.43	9.15	11.79	8.71	46.99	42.76	38.11	13.1	38.72	21.52	64.45	55.28	37.31	25.5	19.26	12.04	87.24	74.73	71.22	23.15	64.11	27.79	0.36	0.36	0.28	0.36	0.61	0.72	0.54	0.57	0.54	0.57	0.6	0.77	1.8	1.65	1.15	0.7	0	0	0	0	0.27697	0.573438	0.272803
Tb927.5.4540	37.31	35.26	38.75	17.83	10.29	14.16	38.12	42.06	54.83	19.4	13.43	15.4	20.83	19.54	22.04	12.86	10.72	14.5	17.56	22.1	25.43	11.37	14.09	13.09	1.79	1.8	1.76	1.39	0.96	0.98	2.17	1.9	2.16	1.71	0.95	1.18	2.63	1.16	1.15	0.99	0	0	0	0	0.562475	0.664089	0.066438
Tb927.10.8330	20.75	17.61	17.37	9.15	4.51	2.75	24.58	24.53	20.2	7.62	12.21	4.99	1.04	1.37	1	0.57	0.58	0.17	1.21	1.11	0.96	0.36	1.06	0.38	19.95	12.85	17.37	16.05	7.78	16.18	20.31	22.1	21.04	21.17	11.52	13.13	3.4	1.26	1.15	0.91	0	0	0	0	0.713444	0.705413	0.197424
Tb927.2.4680	29.92	19.29	21.69	17.48	6.36	5.9	30.1	25.97	23.58	15.59	9.93	9.42	5.06	3.14	3.27	4.18	2.43	1.89	4.05	3.62	3.45	3.05	3.29	2.87	5.91	6.14	6.63	4.18	2.62	3.12	7.43	7.17	6.83	5.11	3.02	3.28	2.38	1.15	1.15	1	0	0	0	0	0.4218	0.758173	0.0395294
Tb927.5.4020	182.4	169.23	197.64	95.19	38.72	29.24	92.64	72.35	120.3	36.61	23.21	28.54	1.12	1.03	0.92	0.52	0.73	0.11	0.54	0.08	0.78	0.15	0.1	0.28	162.86	164.3	214.83	183.06	53.04	265.82	171.56	904.38	154.23	244.07	232.1	101.93	3.37	2.27	1.15	0.51	1	0	0	0	0.883243	0.778196	0.485247
Tb927.9.15600	15.27	12.46	12.96	8.67	3.3	2.98	21.19	21.69	17.28	12.54	13.84	6.5	0.54	0.56	0.31	0.26	0.19	0.52	0.67	0.37	0.93	0.61	0.81	0.24	28.28	22.25	41.81	33.35	17.37	5.73	31.63	58.62	18.58	20.56	17.09	27.08	2.72	1.18	1.15	0.97	0	0	0	0	0.956043	0.801183	0.351391
Tb927.9.13200	199.29	208.24	181.27	106.27	71.76	31.65	138.28	100.95	99.69	57.02	71.86	40.32	68.11	78.47	71.17	49.52	52.74	31.19	43.39	30.78	40.56	26.3	41.96	30.1	2.93	2.65	2.55	2.15	1.36	1.01	3.19	3.28	2.46	2.17	1.71	1.34	2.81	1.1	1.15	1.05	0	0	0	0	0.870228	0.837084	0.0348168
Tb927.11.15910	65.45	60.65	67.38	26.41	15.43	9.12	58.94	52.59	57.8	18.74	19.97	13.28	262.13	241.35	268.81	162.93	123.44	78.31	219.67	177.37	225.85	100.84	139.97	95.33	0.25	0.25	0.25	0.16	0.13	0.12	0.27	0.3	0.26	0.19	0.14	0.14	3.8	1.11	1.15	1.04	0	0	0	0	0.716801	1.11313	0.0163338
Tb927.8.1010	43.16	46.9	45.78	36.83	27.03	29.3	46.19	50.04	50.01	39.96	28.94	33.82	12.08	15.55	14.58	15.08	14.85	16.17	13.04	15.31	13.98	15.54	13.68	14.93	3.57	3.02	3.14	2.44	1.82	1.81	3.54	3.27	3.58	2.57	2.12	2.27	1.46	1.07	1.15	1.07	0	0	0	0	0.842035	1.37525	0.0136652
Tb927.2.2880	16.93	17.35	17.94	8.06	4.37	3.27	18.64	18.97	19.09	8.33	6.99	4.05	11.5	12.76	12.26	10.24	10.09	11.06	11.79	11.36	11.49	11.37	10.49	11.49	1.47	1.36	1.46	0.79	0.43	0.3	1.58	1.67	1.66	0.73	0.67	0.35	3.33	1.14	1.15	1.01	0	0	0	0	0.318482	1.49318	0.01946
Tb927.10.16000	78.36	61.38	60.92	37.79	19.65	22.93	91.59	91.2	125.86	68.5	28.58	47.52	6.72	5.37	5.06	6.58	5.14	7.05	7.69	5.84	9.45	9.44	8.56	11.49	11.66	11.43	12.04	5.74	3.82	3.25	11.91	15.62	13.32	7.26	3.34	4.14	2.5	1.16	1.15	0.99	0	0	0	0	0.77766	1.89691	0.0164353
Tb927.11.13500	227.52	259.35	263.75	68.69	40.32	32.62	271.8	316.8	320.54	98.71	60.1	85.91	175.35	204.63	208.2	92.54	92.77	78.08	186.65	220	232.45	130.85	118.94	151.14	1.3	1.27	1.27	0.74	0.43	0.42	1.46	1.44	1.38	0.75	0.51	0.57	5.3	1.11	1.15	1.04	0	0	0	0	0.359159	2.04451	0.014775
Tb927.10.10850	101.35	100.25	101.59	68.78	49.25	62.32	89.79	102.18	131.42	71.64	40.59	73.57	23.24	20.88	21.38	27.29	33.04	51.08	16.6	17.57	25.02	27.22	25.69	41.35	4.36	4.8	4.75	2.52	1.49	1.22	5.41	5.82	5.25	2.63	1.58	1.78	1.68	1.18	1.15	0.97	0	0	0	0	0.36771	3.5614	0.0125971
Tb927.3.1700	43.41	34.83	37.92	19.53	10.92	11.52	27.34	33.83	34.85	11.32	13.53	11.35	16.31	12.37	13.75	13.73	12.71	13.59	8.7	12.39	12.23	8.07	11.55	11.02	2.66	2.82	2.76	1.42	0.86	0.85	3.14	2.73	2.85	1.4	1.17	1.03	2.77	1.06	1.15	1.08	0	0	0	0	0.836391	10.3297	0.0099736
Tb927.9.15660	15.48	15.68	14.66	3.36	0.82	0.8	9.03	9.88	15.64	2.54	1.42	0.89	7.22	6.61	5.45	3.23	3.54	2.12	3.89	4.03	5.75	3.2	2.23	1.88	2.14	2.37	2.69	1.04	0.23	0.38	2.32	2.45	2.72	0.79	0.64	0.47	9.2	1.04	1.15	1.11	0	0	0	0	0.942682	22.5211	0.0095295
Tb927.10.14210	61.8	61.9	62.01	90.14	93.7	56.47	72.03	63.21	49.68	100.74	109.82	84.4	17.51	18.81	16.89	27.15	34.55	19.55	20.32	18.56	12.72	27.22	33.4	26.47	3.53	3.29	3.67	3.32	2.71	2.89	3.54	3.41	3.91	3.7	3.29	3.19	0.77	1.04	1.14	1.1	0	0	0	0	0.920193	0.160868	0.366894
Tb927.8.3720	14.24	12.89	12.22	9.33	8.54	8.14	19.86	17.98	16.28	13.35	15.56	10.74	4.9	3.69	4.36	3.84	2.72	2.81	5.56	5.27	4.89	3.71	5.22	3.53	2.91	3.49	2.8	2.43	3.14	2.9	3.57	3.41	3.33	3.6	2.98	3.04	1.51	1.12	1.14	1.02	0	0	0	0	0.777804	0.261782	0.379593
Tb927.9.10560	52.67	48.67	46.26	24.5	15.28	12.1	49.37	42.22	44.15	17.42	19.71	17.19	118.95	108.16	113.72	82.16	63.47	38.75	98.82	80	97.95	51.94	64.01	53.83	0.44	0.45	0.41	0.3	0.24	0.31	0.5	0.53	0.45	0.34	0.31	0.32	2.85	1.14	1.14	1	0	0	0	0	0.631099	0.393157	0.0205949
Tb927.9.5710	36.9	39.77	38.36	42.19	37.26	33.54	38.29	40.04	33.96	45.39	34.46	35	15.56	17.18	16.98	20.27	20.86	22.59	14.46	15.19	13.46	19.19	20.22	17.33	2.37	2.31	2.26	2.08	1.79	1.48	2.65	2.64	2.52	2.37	1.7	2.02	1.02	1.13	1.14	1.01	0	0	0	0	0.264314	0.444353	0.102428
Tb927.5.800	140.61	80.62	30.77	29.07	33.92	22.7	115.46	71.24	59.02	20.92	71.05	51.9	33.2	17.01	6.15	7.15	11.06	8.89	30.77	16.91	12.35	4.87	23.51	13.8	4.24	4.74	5	4.07	3.07	2.55	3.75	4.21	4.78	4.3	3.02	3.76	2.94	0.91	1.14	1.25	0	0	0	0	0.842715	0.491217	0.325954
Tb927.10.8940	327.54	255.14	143.83	95.72	106.36	93.16	319.21	268.19	290.77	96.07	192.63	157.27	366.96	280.61	151.03	98.9	65.94	61.06	334.26	282.52	318.35	54.84	166.58	88.22	0.89	0.91	0.95	0.97	1.61	1.53	0.95	0.95	0.91	1.75	1.16	1.78	2.46	1.02	1.14	1.12	0	0	0	0	0.869802	0.60034	0.100265
Tb927.11.11110	43.66	39.17	31.94	37.83	24.65	28.89	51.5	44.65	31.96	44.73	30.51	28.87	12.99	11.3	9.69	14.95	14.46	22.42	14.21	13.33	11.27	16.4	17.94	15.45	3.36	3.47	3.3	2.53	1.7	1.29	3.62	3.35	2.84	2.73	1.7	1.87	1.26	0.97	1.14	1.18	0	0	0	0	0.953043	0.753033	0.0558465
Tb927.11.9590	1390.45	1687.92	1499.86	1284.52	1155.02	885.8	1538.06	1288.75	1568.57	1454.5	865.83	1242.63	514.46	616.37	547.92	692.95	827.35	721.43	463.26	391.41	489.07	689.78	619.79	787.6	2.7	2.74	2.74	1.85	1.4	1.23	3.32	3.29	3.21	2.11	1.4	1.58	1.38	1.2	1.14	0.95	0	0	0	0	0.134829	0.820196	0.0256476
Tb927.5.2540	9.21	9.92	7.03	4.84	3.83	1.32	8.7	9.18	10.2	4.72	4	2.17	1.78	1.89	1.7	1.53	1.84	1.09	2.17	2.02	1.67	1.27	1.98	1.32	5.17	5.25	4.14	3.16	2.08	1.21	4.01	4.54	6.11	3.72	2.02	1.64	2.62	1.01	1.14	1.13	0	0	0	0	0.994982	0.872129	0.0640685
Tb927.10.4880	199.54	237.49	226.7	186.73	169.49	129.97	246.01	292.39	236.6	222.55	254.1	224.43	78.85	92.61	81.39	86.04	105.2	87.08	83.56	99.3	83.04	101.6	129.84	121.47	2.53	2.56	2.79	2.17	1.61	1.49	2.94	2.94	2.85	2.19	1.96	1.85	1.37	1.11	1.14	1.03	0	0	0	0	0.514533	0.899917	0.0183539
Tb927.2.5250	135.05	133.93	144.84	179.54	160.17	175.08	162.15	160.54	133.76	226.56	158.52	180.58	13.41	15.33	15.75	22.06	34.69	34.68	12.62	15.06	11.01	26.91	29.75	27.41	10.07	8.74	9.2	8.14	4.62	5.05	12.85	10.66	12.15	8.42	5.33	6.59	0.8	1.27	1.14	0.9	0	0	0	0	0.453703	1.05742	0.0222835
Tb927.11.7380	96.91	61.12	64.63	23.54	5.68	3.27	87.62	78.44	95.2	18.13	11.2	10.41	83	52.57	52.93	38.23	16.11	9	65.42	55.64	69.99	26.3	30.61	23.31	1.17	1.16	1.22	0.62	0.35	0.36	1.34	1.41	1.36	0.69	0.37	0.45	6.85	1.16	1.14	0.98	0	0	0	0	0.188051	1.38836	0.019731
Tb927.4.4480	38.39	30.2	36.57	11.55	3.83	2.35	53.42	58.89	76.85	18.38	7.6	9.37	68.56	55.84	51.71	34.09	30.33	27.58	78.42	75.43	95.54	48.49	72.77	59.3	0.56	0.54	0.71	0.34	0.13	0.09	0.68	0.78	0.8	0.38	0.1	0.16	5.93	1.25	1.14	0.91	0	0	0	0	0.593494	1.45934	0.0229477
Tb927.6.4560	67.61	70.14	67.25	48.91	41.24	31.82	75.66	69.96	65.32	43.06	51.64	38.72	2.32	2.49	2.75	2.7	3.59	2.75	2.93	2.92	2.48	2.54	3.19	2.83	29.14	28.17	24.45	18.11	11.49	11.57	25.82	23.96	26.34	16.95	16.19	13.68	1.68	0.93	1.14	1.23	0	0	0	0	0.837077	3.10969	0.0120454
Tb927.9.5960	50.55	51.2	44.12	17.83	15.96	6.31	55.81	60.62	70.96	12.29	18.95	13.94	85.87	83.8	75.76	53.96	67.88	45.98	81.35	91.94	109.55	41.48	69.73	58.07	0.59	0.61	0.58	0.33	0.24	0.14	0.69	0.66	0.65	0.3	0.27	0.24	3.64	1.12	1.14	1.02	0	0	0	0	0.303019	64.0661	0.0112408
Tb927.2.1720	25.86	23.84	17.15	39.84	37.75	24.31	32.86	31.36	15.35	49.91	49.82	29.06	2.91	2.53	1.7	6.36	5.73	3.33	4.93	4.73	1.74	7.06	5.98	3.91	8.89	9.42	10.09	6.26	6.59	7.3	6.67	6.63	8.82	7.07	8.33	7.43	0.66	0.78	1.13	1.45	0	0	0	0	0.576669	0.142748	0.796571
Tb927.11.5280	93.5	118.85	107.18	93.67	87.49	65.87	101.58	122.27	104.25	99.77	88.64	83.41	16.77	23.07	20.55	18.74	18.54	12.73	16.22	23.21	22.06	16.45	17.74	14.41	5.58	5.15	5.22	5	4.72	5.17	6.26	5.27	4.73	6.07	5	5.79	1.29	1.02	1.13	1.11	0	0	0	0	0.978911	0.167775	0.744387
Tb927.10.4790	30.13	27.02	31.25	37.14	36.05	29.98	35.91	35.52	27.47	42.75	49.26	40.84	4.15	3.31	4.71	6.45	4.9	4.36	4.39	4.61	3	5.43	6.54	5.75	7.26	8.16	6.63	5.76	7.36	6.88	8.18	7.7	9.16	7.87	7.53	7.1	0.86	1.14	1.13	0.99	0	0	0	0	0.743777	0.230005	0.191058
Tb927.11.15150	92.26	83.07	62.05	45.24	59	44.03	82.81	72.59	64.4	46.87	83.82	65	43.58	38.1	32.6	27.02	38.38	31.3	40.42	39.55	32.22	30.82	42.06	37.49	2.12	2.18	1.9	1.67	1.54	1.41	2.05	1.84	2	1.52	1.99	1.73	1.6	0.95	1.13	1.19	0	0	0	0	0.864685	0.287649	0.263596
Tb927.2.1730	37.06	34.62	25.09	56.75	63.95	51.65	39.71	38.97	17.2	70.43	63.25	47.43	0.71	0.69	0.65	1.48	1.8	1.89	0.84	0.62	0.3	1.68	1.52	1.55	52.2	50.17	38.6	38.34	35.53	27.33	47.27	62.85	57.33	41.92	41.61	30.6	0.56	1.19	1.13	0.95	0	0	0	0	0.787632	0.53965	0.0510523
Tb927.11.14000	935	857.73	859.77	1191.98	1113.1	802.44	830.54	733.51	760.15	919.89	1068.14	807.05	158.54	155.92	159.67	250.98	280.65	216.65	128.21	123.87	118.45	179.08	236.21	182.56	5.9	5.5	5.38	4.75	3.97	3.7	6.48	5.92	6.42	5.14	4.52	4.42	0.85	1.12	1.13	1.01	0	0	0	0	0.465127	0.635691	0.0168331
Tb927.2.2130	48.35	43.47	29.19	20.31	15.09	10.26	31.19	22.76	27.51	7.87	17.38	10.83	31.83	28.39	18.37	13.25	15.53	14.22	19.81	15.35	19.54	5.94	12.21	11.92	1.52	1.53	1.59	1.53	0.97	0.72	1.57	1.48	1.41	1.32	1.42	0.91	2.65	0.96	1.13	1.18	0	0	0	0	0.839035	0.686145	0.233737
Tb927.11.460	32	25.34	27.71	18.57	10.43	13.59	25.08	22.18	29.81	16.86	9.22	14.41	1.37	1.55	1.44	1.53	1.26	2.12	1.25	1.23	1.11	1.78	1.01	1.22	23.36	16.35	19.24	12.14	8.28	6.41	20.06	18.03	26.86	9.47	9.13	11.81	2	1.1	1.13	1.03	0	0	0	0	0.931357	0.713986	0.0494532
Tb927.7.1930	9.5	9.62	7.03	7.32	6.36	4.19	16.14	17.61	13.87	15.94	9.73	9.14	1.08	1.37	0.87	1.48	1.5	0.86	1.63	1.48	1.52	2.49	1.93	2.07	8.8	7.02	8.08	4.95	4.24	4.87	9.9	11.9	9.13	6.4	5.04	4.42	1.46	1.29	1.13	0.88	0	0	0	0	0.578891	0.843962	0.0201836
Tb927.9.7100	16.39	13.7	13.83	9.63	4.42	3.1	28.34	24.36	25.43	18.28	9.83	10.64	16.52	15.51	15.45	14.73	8.98	5.62	23.03	23.33	22.24	22.54	18.8	18.27	0.99	0.88	0.9	0.65	0.49	0.55	1.23	1.04	1.14	0.81	0.52	0.58	2.56	1.23	1.13	0.92	0	0	0	0	0.457459	0.897773	0.0232033
Tb927.11.715	27.39	21.91	22.87	9.81	5.05	1.78	29.6	22.51	22.43	8.12	8.06	3.86	54.24	58.76	50.71	37.96	31.83	17.6	61.2	50.17	52.35	28.59	51.03	25.01	0.5	0.37	0.45	0.26	0.16	0.1	0.48	0.45	0.43	0.28	0.16	0.15	4.34	1.03	1.13	1.1	0	0	0	0	0.969991	1.1413	0.026512
Tb927.7.5540	73.92	66.75	65.37	65.34	50.07	58.99	79.97	73.09	80.67	72.3	50.32	59.39	3.9	3.05	3.27	5.14	5.63	7.22	4.35	3.54	3.63	5.08	5.32	6.03	18.95	21.89	19.99	12.71	8.89	8.17	18.38	20.65	22.22	14.23	9.46	9.85	1.18	1.01	1.13	1.12	0	0	0	0	0.991025	1.14937	0.0202869
Tb927.11.1030	46.48	44.46	46.26	12.77	3.4	2.06	60.95	67.04	84.56	15.84	13.33	11.07	18.01	18.94	18.07	8.46	4.61	3.15	22.82	23.09	30.36	9.95	16.93	12.29	2.58	2.35	2.56	1.51	0.74	0.65	2.67	2.9	2.79	1.59	0.79	0.9	7.53	1.12	1.13	1.01	0	0	0	0	0.459173	1.19999	0.0257051
Tb927.11.1430	130.65	132.64	128.95	40.97	15.92	9.63	110.78	100.54	154.19	25.69	15.81	20.39	64.16	66.71	61.49	34.74	26.4	15.88	49.37	45.19	69.33	21.58	24.12	24.02	2.04	1.99	2.1	1.18	0.6	0.61	2.24	2.22	2.22	1.19	0.66	0.85	5.9	1.09	1.13	1.04	0	0	0	0	0.390109	1.21765	0.0231414
Tb927.10.9180	32.45	35.26	34.47	18.13	14.94	9.98	47.91	60.99	49.72	41.48	26.61	32.69	22.7	23.92	21.12	17.09	16.16	13.47	26.34	30.17	25.4	33.56	32.54	32.78	1.43	1.47	1.63	1.06	0.92	0.74	1.82	2.02	1.96	1.24	0.82	1	2.37	1.28	1.13	0.88	0	0	0	0	0.27621	1.23017	0.0181218
Tb927.11.4570	25.86	24.44	25.31	13.69	7.04	4.53	43.14	50	41.11	20.46	13.94	10.97	39.39	43.94	40.5	37.18	37.22	42.65	62.54	78.93	73.81	55.09	65.17	60.1	0.66	0.56	0.62	0.37	0.19	0.11	0.69	0.63	0.56	0.37	0.21	0.18	2.99	1.02	1.13	1.11	0	0	0	0	0.969988	1.62421	0.0195547
Tb927.8.5870	22.54	22.34	19.29	13.08	5.73	5.33	28.59	35.6	25.91	14.01	12.37	8.9	42.87	46	45.47	38.92	33.67	32.33	53.76	67.08	58.13	43.67	54.53	42.3	0.53	0.49	0.42	0.34	0.17	0.16	0.53	0.53	0.45	0.32	0.23	0.21	2.66	1.05	1.13	1.08	0	0	0	0	0.934788	2.103	0.0158365
Tb927.6.3640	28.6	25.9	24.52	9.41	2.86	2.41	25.37	30.54	33.37	6.55	5.42	3.63	16.81	15.46	18.28	10.77	9.22	7.4	15.76	15.06	18.43	8.02	11.76	8.53	1.7	1.68	1.34	0.87	0.31	0.33	1.61	2.03	1.81	0.82	0.46	0.43	5.38	1.15	1.13	0.98	0	0	0	0	0.779779	4.72691	0.0123114
Tb927.6.4140	224.19	163.26	68.73	87.13	100.49	60.25	190.87	107.04	98.02	61.74	170.48	96.13	135.5	102.14	39.45	62.24	63.81	41.51	111.15	67.2	60.13	34.32	112.76	59.06	1.65	1.6	1.74	1.4	1.57	1.45	1.72	1.59	1.63	1.8	1.51	1.63	1.84	0.99	1.12	1.13	0	0	0	0	0.967376	0.167735	1.00039
Tb927.3.3330	135.17	142.6	111.85	93.89	98.6	71.55	162.11	134.78	115.67	87.08	152.69	91.23	34.61	34.92	27.88	26.81	26.06	19.78	41.76	33.62	30.07	23.31	34.11	23.13	3.91	4.08	4.01	3.5	3.78	3.62	3.88	4.01	3.85	3.74	4.48	3.94	1.48	0.98	1.12	1.14	0	0	0	0	0.819132	0.192626	0.604976
Tb927.3.2030	13.45	15.98	14.49	15.82	14.75	13.36	18.89	18.44	13.38	21.63	19.71	15.73	19.46	19.07	17.98	21.88	24.36	18.92	20.48	21.32	17.61	25.34	27.16	22.37	0.69	0.84	0.81	0.72	0.61	0.71	0.92	0.86	0.76	0.85	0.73	0.7	1	1.09	1.12	1.03	0	0	0	0	0.854223	0.255792	0.269675
Tb927.10.12610	10.83	11.21	9.69	9.15	6.7	6.08	18.81	22.02	21.69	15.28	14.75	13.42	5.48	5.71	4.06	5.06	4.61	3.9	8.15	10.08	8.97	7.62	8.31	8.2	1.98	1.96	2.39	1.81	1.45	1.56	2.31	2.18	2.42	2.01	1.77	1.64	1.45	1.09	1.12	1.03	0	0	0	0	0.828177	0.359331	0.0340282
Tb927.1.3390	39.97	35.39	40.19	31.73	28.39	27.06	34.57	28.6	30.4	27.47	36.99	31.56	12.33	11.98	11.87	10.72	12.47	11.29	8.7	7.82	8.75	8.43	13.02	12.76	3.24	2.95	3.39	2.96	2.28	2.4	3.97	3.66	3.47	3.26	2.84	2.47	1.33	1.16	1.12	0.97	0	0	0	0	0.515038	0.456806	0.0543966
Tb927.11.9850	24.94	17.91	20.12	27.55	24.84	21.33	36.54	30.21	21.72	37.73	43.53	27.36	1.74	1.68	1.53	2.53	2.62	2.92	3.05	1.89	2.26	3.15	4.56	2.87	14.33	10.66	13.15	10.89	9.48	7.3	11.98	15.98	9.61	11.98	9.55	9.53	0.85	0.99	1.12	1.13	0	0	0	0	0.990867	0.459198	0.382541
Tb927.8.5270	20.71	21.82	15.93	15.74	10.58	6.94	24.58	33.83	22.76	19.85	21.13	13.05	4.81	5.5	4.01	4.97	4.37	2.87	5.43	6.38	5.64	5.89	7.09	5.04	4.31	3.97	3.97	3.17	2.42	2.42	4.53	5.3	4.04	3.37	2.98	2.59	1.76	1.13	1.12	0.99	0	0	0	0	0.82146	0.558113	0.0359621
Tb927.10.5750	42.08	35.09	33.6	35.74	24.6	20.12	48.16	48.4	37.11	48.24	31.37	30.38	23.12	20.96	19.29	25.76	23.15	16.22	23.33	21.44	18.35	28.64	28.02	22.56	1.82	1.67	1.74	1.39	1.06	1.24	2.06	2.26	2.02	1.68	1.12	1.35	1.38	1.21	1.12	0.93	0	0	0	0	0.370603	0.622528	0.0398576
Tb927.1.1560	31.46	28.61	28.71	15.56	12.42	13.47	34.78	35.43	39.89	16.25	17.94	21.67	19.92	18.77	18.5	16.39	16.06	12.33	18.06	19.51	16.46	15.03	21.23	17.76	1.58	1.52	1.55	0.95	0.77	1.09	1.93	1.82	2.42	1.08	0.85	1.22	2.14	1.33	1.12	0.84	0	0	0	0	0.635058	0.768947	0.0250813
Tb927.10.3740	35.53	38.57	37.49	41.97	44.11	45.35	43.22	44.24	39.41	51.74	46.27	49.93	1.45	2.06	1.57	2.48	4.51	4.59	1.8	2.3	1.93	2.69	4.21	4.62	24.5	18.72	23.88	16.92	9.78	9.88	24.01	19.23	20.42	19.23	10.99	10.81	0.85	0.95	1.12	1.18	0	0	0	0	0.940753	0.787713	0.105883
Tb927.11.2600	109.44	103.56	101.42	97.85	82.05	68.11	110.11	110.7	115.78	102.21	69.99	92.55	6.27	6.19	5.85	9.28	10.38	8.6	5.77	5.8	6.08	8.43	7.91	10.69	17.45	16.73	17.34	10.54	7.9	7.92	19.08	19.09	19.04	12.12	8.85	8.66	1.27	1.11	1.12	1.01	0	0	0	0	0.328793	0.819944	0.0244409
Tb927.9.15580	9.59	8.2	6.68	5.19	1.7	2.24	14.38	12.84	8.97	7.51	5.83	2.78	0.79	0.82	0.65	0.61	0.49	0.8	1.25	1.23	1.45	1.27	0.76	0.94	12.14	10	10.28	8.51	3.47	2.8	11.5	10.44	6.19	5.91	7.67	2.96	2.68	0.87	1.12	1.29	0	0	0	0	0.898258	0.877096	0.157463
Tb927.1.4500	76.57	66.02	63.8	30.12	26.2	27.35	71.15	77.24	76.48	30.36	36.39	30.85	83.46	73.58	67.81	50.52	58.32	67.36	72.57	76.71	80.86	46.21	71.05	66.17	0.92	0.9	0.94	0.6	0.45	0.41	0.98	1.01	0.95	0.66	0.51	0.47	2.47	1.07	1.12	1.05	0	0	0	0	0.486789	0.925574	0.0218323
Tb927.10.10260	3216.42	2742.72	2652.13	1775.49	813.42	592.39	2444.56	1429.94	1802.58	967.01	677.16	561.15	3432.44	3221.68	3234.62	2396.91	1801.82	1410.71	2224	1333.4	1971	1263.59	1191.74	1205.84	0.94	0.85	0.82	0.74	0.45	0.42	1.1	1.07	0.91	0.77	0.57	0.47	2.71	1.18	1.12	0.95	0	0	0	0	0.616458	0.942321	0.0308274
Tb927.10.10100	68.69	59.88	60.7	38.49	19.89	17.08	108.14	61.28	80.6	51.13	16.06	15.12	17.76	15.59	15.88	15.3	15.38	13.3	20.78	14.4	18.54	15.79	12.72	12.76	3.87	3.84	3.82	2.52	1.29	1.28	5.2	4.26	4.35	3.24	1.26	1.18	2.51	1.2	1.12	0.93	0	0	0	0	0.671537	1.01764	0.0498009
Tb927.11.4040	37.14	30.8	33.21	17.48	15.87	15.77	40.63	34.32	36.22	15.64	25.19	23.17	5.89	4.08	4.32	3.53	4.8	4.76	4.35	4.69	4.52	2.84	7.35	5.7	6.31	7.55	7.69	4.95	3.31	3.31	9.34	7.32	8.01	5.51	3.43	4.06	2.06	1.14	1.12	0.98	0	0	0	0	0.795205	1.16752	0.0205261
Tb927.2.4760	53.66	51.29	50.49	21.01	6.65	9.17	42.72	37.66	46.19	12.85	8.62	6.69	36.15	38.19	38.45	25.46	22.13	26.72	31.02	26.75	30.73	15.84	20.12	16.53	1.48	1.34	1.31	0.83	0.3	0.34	1.38	1.41	1.5	0.81	0.43	0.4	4.22	1.04	1.12	1.08	0	0	0	0	0.883566	1.2875	0.0258264
Tb927.10.15920	33.7	33.89	32.69	18.83	14.07	5.85	25.92	21.89	30.07	11.58	12.47	11.63	91.43	105.19	95.7	76.15	70.6	37.89	75.16	62.8	88.72	49.81	61.17	49.36	0.37	0.32	0.34	0.25	0.2	0.15	0.34	0.35	0.34	0.23	0.2	0.24	2.59	1	1.12	1.12	0	0	0	0	1.01045	1.35865	0.0172597
Tb927.4.4510	14.07	16.79	15.23	3.23	2.96	2.75	34.19	45.93	75.78	8.73	9.17	10.03	16.06	15.42	13.96	7.41	5.68	6.36	27.92	38.4	56.17	12.95	27.21	18.27	0.88	1.09	1.09	0.44	0.52	0.43	1.22	1.2	1.35	0.67	0.34	0.55	5.16	1.23	1.12	0.91	0	0	0	0	0.500446	1.57952	0.0178834
Tb927.7.4280	23.2	20.79	17.76	8.28	3.83	2.01	36.29	36.3	33.74	6.6	9.02	3.77	21.75	21.95	21.78	14.3	12.42	9.23	36.33	37.28	38.59	11.83	23.72	12.62	1.07	0.95	0.82	0.58	0.31	0.22	1	0.97	0.87	0.56	0.38	0.3	4.37	1	1.12	1.12	0	0	0	0	1.00411	1.66898	0.0191129
Tb927.11.15840	204.52	218.76	230.37	125.27	58.32	41.97	172.02	178.27	231.19	95.3	55.34	54.21	208.13	207.89	208.94	222.43	210.05	146.53	160.19	147.2	223.96	154.76	166.88	170.88	0.98	1.05	1.1	0.56	0.28	0.29	1.07	1.21	1.03	0.62	0.33	0.32	2.9	1.06	1.12	1.06	0	0	0	0	0.867661	1.71939	0.0186045
Tb927.11.1220	47.6	37.28	42.37	16.65	4.71	4.24	47.36	46.42	49.6	15.54	11.35	11.68	17.56	14.69	17.19	12.07	5.87	7.4	18.81	20.95	20.87	11.83	15.15	11.45	2.71	2.54	2.46	1.38	0.8	0.57	2.52	2.22	2.38	1.31	0.75	1.02	4.97	0.92	1.12	1.22	0	0	0	0	0.713119	2.33537	0.0156687
Tb927.11.7860	48.47	41.92	45.12	20.36	9.66	7.51	56.68	59.92	62.99	24.17	13.13	17.14	38.64	30.28	36.09	32.21	26.06	33.42	42.1	39.71	44.53	37.02	45.96	40.13	1.25	1.38	1.25	0.63	0.37	0.22	1.35	1.51	1.41	0.65	0.29	0.43	3.61	1.1	1.12	1.02	0	0	0	0	0.6389	2.51554	0.0155183
Tb927.9.1510	64.41	46.99	41.19	12.73	3.98	1.95	70.77	60.29	63.21	6.45	11.15	4.99	24.4	18.64	16.93	8.98	4.61	2.75	26.84	24.77	26.25	4.98	13.28	4.14	2.64	2.52	2.43	1.42	0.86	0.71	2.64	2.43	2.41	1.3	0.84	1.21	8.18	0.99	1.12	1.13	0	0	0	0	0.963002	2.92911	0.0138316
Tb927.9.7980	56.78	44.76	50.05	17.13	8.64	5.27	48.99	37.28	42.52	6.6	13.02	6.59	22	19.54	18.98	10.11	6.65	6.08	19.65	13.25	14.61	4.21	9.78	4.66	2.58	2.29	2.64	1.69	1.3	0.87	2.49	2.81	2.91	1.57	1.33	1.41	4.88	1.09	1.12	1.03	0	0	0	0	0.792913	3.13437	0.0129359
Tb927.4.2590	11.29	10.18	8.81	1.22	0.19	0.34	12.62	13	19.87	0.46	0.81	0.71	26.1	22.46	22.74	9.81	8.93	10.61	28.47	25.14	41.23	6.96	15.91	10.27	0.43	0.45	0.39	0.12	0.02	0.03	0.44	0.52	0.48	0.07	0.05	0.07	17.3	1.13	1.12	0.99	0	0	0	0	0.672308	6.05494	0.0114911
Tb927.10.9330	35.9	23.88	17.67	6.67	3.64	2.64	29.26	25.14	38	4.37	6.64	6.55	8.05	5.54	3.49	4.66	5.24	5.85	6.86	6.46	7.86	3.45	8.11	8.24	4.46	4.31	5.06	1.43	0.69	0.45	4.27	3.89	4.83	1.27	0.82	0.79	5.98	0.94	1.12	1.19	0	0	0	0	0.897627	6.40161	0.0110962
Tb927.10.1050	35.61	37.76	39.89	16.48	14.94	13.24	54.93	65.89	61.13	28.33	25.19	20.58	7.59	6.57	6.76	6.1	6.55	8.08	8.19	8.89	8.16	8.94	12.42	9.28	4.69	5.75	5.9	2.7	2.28	1.64	6.71	7.41	7.49	3.17	2.03	2.22	2.54	1.32	1.12	0.85	0	0	0	0	0.384645	9.12885	0.0104867
Tb927.7.6360	30.63	34.96	36.61	14.17	9.12	5.56	31.69	40.78	47.49	15.08	10.9	11.49	185.93	196.42	213.74	164.06	194.67	176	176.7	208.23	246.61	180.4	188.52	239.03	0.16	0.18	0.17	0.09	0.05	0.03	0.18	0.2	0.19	0.08	0.06	0.05	3.54	1.12	1.12	1	0	0	0	0	0.540167	12.577	0.0102573
Tb927.11.10760	115.67	106.31	95	42.32	29.55	15.36	116.67	107.45	138.99	49.45	57.87	48.7	47.89	47.33	39.89	29.81	29.6	19.89	48.03	42.14	50.68	38.94	55.9	38.86	2.42	2.25	2.38	1.42	1	0.77	2.43	2.55	2.74	1.27	1.04	1.25	3.63	1.1	1.12	1.02	0	0	0	0	0.64618	16.2961	0.00975952
Tb927.4.1540	43.78	33.12	32.99	11.64	8.01	6.82	47.95	44.82	58.24	10.05	13.84	12.67	97.28	70.4	71	62.2	48.23	51.25	91.84	94.41	117.3	48.54	92.69	65.75	0.45	0.47	0.46	0.19	0.17	0.13	0.52	0.47	0.5	0.21	0.15	0.19	4.15	1.08	1.12	1.04	0	0	0	0	0.647277	21.0299	0.00919686
Tb927.11.6990	23.74	21.43	17.37	9.46	1.6	1.55	20.11	20.33	25.73	5.64	3.14	2.87	36.9	30.75	30.55	40.45	27.41	29.24	32.27	29.47	42	32.19	27.32	31.6	0.64	0.7	0.57	0.23	0.06	0.05	0.62	0.69	0.61	0.18	0.11	0.09	4.96	1.01	1.12	1.11	0	0	0	0	0.991068	46.3668	0.00899934
Tb927.10.4620	40.26	40.29	41.67	60.85	66.72	61.74	62.75	67.37	43.71	91.65	128.47	94.39	13.99	16.15	16.28	24.28	26.3	25	21.61	25.93	17.35	31.84	48.4	34.01	2.88	2.49	2.56	2.51	2.54	2.47	2.9	2.6	2.52	2.88	2.65	2.78	0.65	1.01	1.11	1.1	0	0	0	0	0.986815	0.0493971	0.530094
Tb927.8.2900	39.93	36.98	37.62	35.48	41.83	48.73	41.34	40.91	42	46.71	45.81	58.36	4.07	4.34	4.01	5.23	6.11	7.57	4.97	4.28	4.3	5.69	6.28	8.71	9.81	8.52	9.38	6.78	6.85	6.44	8.32	9.56	9.77	8.21	7.29	6.7	0.91	1	1.11	1.11	0	0	0	0	0.99641	0.29624	0.0548505
Tb927.2.4090	81.26	79.55	83.57	66.56	83.75	92.59	79.05	74.86	64.73	72.51	85.54	94.76	30.01	30.15	31.46	32.12	44.3	50.79	28.13	25.56	24.43	35.19	37.5	45.45	2.71	2.64	2.66	2.07	1.89	1.82	2.81	2.93	2.65	2.06	2.28	2.08	1.01	1.05	1.11	1.06	0	0	0	0	0.7999	0.39726	0.0144775
Tb927.9.13540	74.37	80.88	79.77	96.94	86.9	122.63	81.18	90.74	69.51	111.71	78.5	93.16	7.39	6.79	8.29	14.17	12.32	18.75	8.36	9.3	6.71	13.76	10.69	12.81	10.06	11.91	9.62	6.84	7.05	6.54	9.71	9.76	10.36	8.12	7.34	7.27	0.77	0.94	1.11	1.18	0	0	0	0	0.903082	0.406936	0.0136708
Tb927.10.12330	36.07	30.97	40.71	47.21	43.91	50.91	41.22	40.29	31.99	59.56	46.37	49.22	13.94	12.59	16.06	22.49	22.08	29.12	14.46	16.13	12.09	24.02	22.5	25.58	2.59	2.46	2.53	2.1	1.99	1.75	2.85	2.5	2.65	2.48	2.06	1.92	0.76	1.06	1.11	1.05	0	0	0	0	0.826636	0.417966	0.0828445
Tb927.2.1850	56.24	48.45	26.18	33.52	31.54	11.18	61.66	50.95	38.89	35.49	54.17	20.96	9.42	9.54	4.49	7.45	6.31	2.29	10.83	8.68	7.12	5.53	11.76	4.29	5.97	5.08	5.83	4.5	5	4.88	5.69	5.87	5.46	6.42	4.61	4.89	1.72	1.01	1.11	1.1	0	0	0	0	0.987227	0.469632	0.595316
Tb927.10.3540	45.28	28.99	30.15	15.78	6.45	4.59	40.8	29.67	28.18	12.8	11.45	7.3	19.84	12.84	14.27	8.46	3.49	2.01	18.23	14.98	14.53	5.13	6.49	3.06	2.28	2.26	2.11	1.87	1.85	2.28	2.24	1.98	1.94	2.5	1.76	2.39	3.89	0.93	1.11	1.19	0	0	0	0	0.781423	0.485174	0.575518
Tb927.5.960	81.8	96.6	108.92	70.96	79.87	80.43	94.43	115.6	100.25	89.77	90.31	98.01	1.16	2.1	2.53	1.35	1.12	1.32	1.63	2.18	2.34	1.37	1.52	1.22	70.52	46	43.05	52.56	71.31	60.93	57.93	53.03	42.84	65.53	59.41	80.34	1.24	0.96	1.11	1.16	0	0	0	0	0.983929	0.50781	0.105999
Tb927.10.6840	34.03	41.54	24.74	18.09	14.31	6.71	42.97	41.98	29.7	20.77	18.85	13.56	23.61	30.02	18.11	19.83	18.05	8.66	31.77	30.62	23.28	21.48	24.58	13.75	1.44	1.38	1.37	0.91	0.79	0.77	1.35	1.37	1.28	0.97	0.77	0.99	2.56	0.95	1.11	1.17	0	0	0	0	0.704351	0.580018	0.0259979
Tb927.10.4690	36.15	38.92	40.32	35.57	27.46	18.69	46.74	43.75	29.51	35.9	39.28	21.1	49.14	54.46	53.28	59.76	55.02	46.09	59.03	58.4	41.71	56.36	70.59	44.37	0.74	0.71	0.76	0.6	0.5	0.41	0.79	0.75	0.71	0.64	0.56	0.48	1.41	1.02	1.11	1.09	0	0	0	0	0.942188	0.60477	0.0457757
Tb927.9.8050	43.49	42.7	41.28	53	43.33	55.49	44.94	44.36	38.89	52.2	37.15	47.48	41.17	35.35	35.09	62.98	61.91	55.21	36.66	36.59	26.66	56.21	52.6	40.13	1.06	1.21	1.18	0.84	0.7	1.01	1.23	1.21	1.46	0.93	0.71	1.18	0.84	1.13	1.11	0.98	0	0	0	0	0.757133	0.682236	0.111129
Tb927.6.3330	47.19	48.58	47.52	45.55	35.08	29.81	56.6	57.37	51.38	46	47.54	36.83	6.97	6.23	6.98	8.15	8.35	7.85	6.31	7.53	7.08	8.07	9.17	8.9	6.77	7.8	6.81	5.59	4.2	3.8	8.97	7.62	7.26	5.7	5.18	4.14	1.3	1.12	1.11	0.99	0	0	0	0	0.810024	0.930121	0.023572
Tb927.7.7160	19.96	15.33	15.49	3.75	2.62	4.19	30.01	33.29	40.26	7.26	9.48	9.8	37.81	31.4	27.4	12.6	8.39	5.62	41.22	42.47	62.51	13	24.58	17.62	0.53	0.49	0.57	0.3	0.31	0.75	0.73	0.78	0.64	0.56	0.39	0.56	4.81	1.35	1.11	0.82	0	0	0	0	0.39477	0.95445	0.0528045
Tb927.5.2480	3.86	2.28	1.22	1.18	1.41	1.55	16.72	10.29	10.71	2.94	6.74	4.1	2.49	2.1	1.05	1.92	3.01	2.52	10.33	7.49	7.34	4.57	11.2	6.45	1.55	1.09	1.16	0.61	0.47	0.62	1.62	1.37	1.46	0.64	0.6	0.64	1.78	1.17	1.11	0.95	0	0	0	0	0.815237	0.954643	0.0164481
Tb927.6.2510	41.92	36.47	30.15	9.41	2.18	1.2	42.43	39.34	39.19	4.72	6.89	2.78	49.72	48.41	39.8	20.27	9.12	3.67	51.79	46.96	49.94	8.99	25.59	8.29	0.84	0.75	0.76	0.46	0.24	0.33	0.82	0.84	0.78	0.53	0.27	0.34	8.49	1.04	1.11	1.07	0	0	0	0	0.87144	1.00715	0.0354364
Tb927.11.6300	630.63	686.39	734.26	1068.94	1225.38	1145.27	636.91	696.68	489.03	1056.27	1139.29	1072.13	8.96	9.84	10.12	17.87	23.19	27.17	7.78	9.51	6.64	17.37	20.73	19.31	70.38	69.76	72.56	59.82	52.84	42.15	81.87	73.26	73.65	60.81	54.96	55.52	0.6	1.08	1.11	1.03	0	0	0	0	0.75184	1.0086	0.017937
Tb927.6.5020	37.68	36.3	28.67	14.17	4.95	2.52	54.89	56.96	40.34	13.05	18.19	7.68	21.83	22.25	17.41	12.03	4.76	2.41	27	28.11	23.1	9.49	16.27	6.88	1.73	1.63	1.65	1.18	1.04	1.05	2.03	2.03	1.75	1.38	1.12	1.12	4.74	1.16	1.11	0.96	0	0	0	0	0.594442	1.05319	0.0154533
Tb927.10.13100	23.66	20.79	20.47	8.41	3.2	2.81	38.75	36.17	36.41	11.98	17.23	10.03	53.41	46.26	40.32	56.58	53.57	41.05	110.28	113.17	81.41	122.22	158.77	103.38	0.44	0.45	0.51	0.15	0.06	0.07	0.35	0.32	0.45	0.1	0.11	0.1	4.5	0.8	1.11	1.39	0	0	0	0	0.671813	1.12715	0.0295509
Tb927.7.3420	39.1	46.78	47.3	37.01	42.02	31.02	47.74	48.68	44.67	36.15	54.23	40.22	66.2	75.25	66.07	107.88	125.09	138.39	72.78	75.97	69.62	119.27	134.65	134.28	0.59	0.62	0.72	0.34	0.34	0.22	0.66	0.64	0.64	0.3	0.4	0.3	1.21	1.01	1.11	1.1	0	0	0	0	0.991461	1.1964	0.0193236
Tb927.4.5290	24.11	20.88	20.77	14.6	8.44	5.1	28.8	23.91	22.58	13.46	8.67	7.25	4.69	5.46	5.02	6.67	5	4.99	6.27	5.23	5.86	5.59	6.44	4.29	5.14	3.82	4.14	2.19	1.69	1.02	4.59	4.57	3.85	2.41	1.35	1.69	2.34	0.99	1.11	1.12	0	0	0	0	0.99325	2.70737	0.0144781
Tb927.1.2260	121.1	89.43	42.24	67.87	93.26	66.22	101.04	63.13	48.57	45.39	155.94	74.18	183.32	142.05	65.41	71.96	71.04	56.3	139.16	92.64	74.93	37.83	123.2	55.06	0.66	0.63	0.65	0.94	1.31	1.18	0.73	0.68	0.65	1.2	1.27	1.35	1.11	1.06	1.11	1.05	0	0	0	0	0.779801	3.32092	0.0105807
Tb927.8.6350	16.89	14.09	13.31	2.09	0.53	0.4	23.87	29.47	39.97	4.57	2.58	2.68	35.82	29.94	29.11	18.26	12.57	13.19	61.41	66.46	78.97	45.85	64.82	47.57	0.47	0.47	0.46	0.11	0.04	0.03	0.39	0.44	0.51	0.1	0.04	0.06	14.67	0.96	1.11	1.16	0	0	0	0	0.9386	4.46312	0.0128478
Tb927.10.4270	33.2	32.17	32.86	43.98	38.67	33.94	45.94	44.36	33.96	60.57	57.52	49.22	21.83	21.69	21.56	30.25	29.55	24.94	26.59	24.65	20.39	35.9	38.77	35.94	1.52	1.48	1.52	1.45	1.31	1.36	1.73	1.8	1.67	1.69	1.48	1.37	0.84	1.15	1.1	0.96	0	0	0	0	0.36604	0.297506	0.142207
Tb927.11.5950	144.05	138.69	152.87	124.14	107.48	85.19	203.62	172.92	164.31	193.4	170.13	158.16	235.11	249.64	263.1	231.54	239.46	192.68	312.98	275.35	275.83	329.07	343.39	322.02	0.61	0.56	0.58	0.54	0.45	0.44	0.65	0.63	0.6	0.59	0.5	0.49	1.37	1.07	1.1	1.03	0	0	0	0	0.618253	0.376966	0.0803692
Tb927.11.16810	59.27	63.36	58.3	48.69	56.38	47.01	64.21	65.31	75.81	46.15	67.91	66.83	28.84	28.43	25.57	24.32	31.83	29.35	25.92	29.96	33.92	26.71	31.83	32.64	2.06	2.23	2.28	2	1.77	1.6	2.48	2.18	2.23	1.73	2.13	2.05	1.19	1.05	1.1	1.05	0	0	0	0	0.864507	0.382481	0.116545
Tb927.11.8165	55.24	56.01	57.43	66.3	67.88	48.62	71.78	70.21	45.38	73.47	102.67	60.95	19.96	19.5	20.47	28.11	30.67	25	25.75	26.54	17.5	26.81	44.5	28.68	2.77	2.87	2.81	2.36	2.21	1.94	2.79	2.65	2.59	2.74	2.31	2.13	0.92	0.95	1.1	1.16	0	0	0	0	0.6718	0.392716	0.267827
Tb927.11.13785	9.84	8.59	6.33	7.54	8.39	9.57	10.74	11.19	8.3	12.29	13.58	13.09	9.79	10.27	6.94	8.28	10.72	10.66	10.7	11.93	11.16	11.48	16.72	13.66	1.01	0.84	0.91	0.91	0.78	0.9	1	0.94	0.74	1.07	0.81	0.96	0.97	0.97	1.1	1.13	0	0	0	0	0.969299	0.408252	0.659733
Tb927.10.7300	24.86	20.4	18.68	9.07	6.89	3.78	41.68	44.61	35.03	14.32	26.5	12.48	22.16	19.76	18.55	8.98	8.25	3.96	33.32	36.54	33.37	12.29	25.34	14.27	1.12	1.03	1.01	1.01	0.84	0.95	1.25	1.22	1.05	1.17	1.05	0.87	3.24	1.11	1.1	0.99	0	0	0	0	0.746728	0.424416	0.272568
Tb927.4.3320	87.36	72.38	40.45	44.24	46.44	30.67	156.34	110.37	91.2	59.76	118.89	76.44	13.53	11.04	7.37	6.23	7.42	3.84	23.58	16.01	15.46	6.55	18.45	9.56	6.46	6.56	5.49	7.1	6.26	7.99	6.63	6.89	5.9	9.12	6.44	8	1.65	1.05	1.1	1.05	0	0	0	0	0.916586	0.507366	0.22404
Tb927.8.8030	50.13	40.5	28.85	21.05	21.54	14.22	53.47	48.68	42.41	20.67	47.38	24.16	29.09	25.47	19.51	14.78	16.93	13.93	32.1	30.25	26.77	15.03	31.27	20.54	1.72	1.59	1.48	1.42	1.27	1.02	1.67	1.61	1.58	1.38	1.52	1.18	2.1	1.01	1.1	1.09	0	0	0	0	0.968834	0.514215	0.121755
Tb927.6.5120	545.46	561.78	580.44	1032.76	1235.76	1114.66	512.59	527.75	401.24	1043.43	1167.42	1075.38	81.84	93.42	100.06	173.13	229.22	241.41	71.86	80.91	63.95	147.91	211.83	214.82	6.66	6.01	5.8	5.97	5.39	4.62	7.13	6.52	6.27	7.05	5.51	5.01	0.5	1.08	1.1	1.02	0	0	0	0	0.80023	0.534261	0.346388
Tb927.7.4610	29.38	29.08	28.5	31.21	28.97	28.66	31.9	36.67	28.51	40.87	29.95	30.14	3.4	3.31	3.49	4.88	5.09	5.39	3.01	4.2	3.3	5.38	5.27	5.18	8.64	8.79	8.17	6.4	5.69	5.32	10.6	8.73	8.64	7.6	5.68	5.82	0.98	1.09	1.1	1.01	0	0	0	0	0.845253	0.634666	0.0389245
Tb927.10.16030	36.4	35.65	32.86	34	24.99	19.55	34.61	34.94	31.33	28.74	23.06	17.38	1.16	1.25	1.35	1.44	1.26	1.15	1.09	1.19	0.96	1.17	0.91	1.04	31.38	28.52	24.34	23.61	19.83	17	31.75	29.36	32.64	24.56	25.34	16.71	1.34	1.11	1.1	0.99	0	0	0	0	0.805507	0.664923	0.0786126
Tb927.5.4260	44.12	59.02	64.58	54.14	63.32	69.37	66.8	95.39	59.13	81.95	104.24	98.01	51.13	75.73	91.86	55.01	92.73	100.79	61.45	99.59	71.77	74.39	134.4	140.12	0.86	0.78	0.7	0.98	0.68	0.69	1.09	0.96	0.82	1.1	0.78	0.7	0.9	1.23	1.1	0.89	0	0	0	0	0.689011	0.665102	0.5586
Tb927.8.1120	36.07	35.48	33.08	31.69	27.32	23.62	36.58	40.17	31.4	31.84	31.17	25.06	11.12	12.97	12.09	12.29	13.83	14.85	12	14.32	11.31	11.93	16.77	11.26	3.24	2.74	2.74	2.58	1.98	1.59	3.05	2.81	2.78	2.67	1.86	2.23	1.27	0.99	1.1	1.11	0	0	0	0	0.988172	0.681114	0.113666
Tb927.3.1150	64.04	70.1	69.56	87.92	91.32	104.74	77.25	86.3	58.17	108.3	102.57	104.7	5.48	6.53	5.72	10.55	14.22	15.48	7.11	7.61	4.63	12.54	17.08	11.54	11.69	10.74	12.16	8.33	6.42	6.77	10.86	11.34	12.56	8.64	6.01	9.07	0.72	1	1.1	1.1	0	0	0	0	0.990937	0.686788	0.051421
Tb927.5.4380	34.2	28.05	17.8	7.45	8.64	9.34	46.86	48.35	43.38	9.8	28.33	21.52	63.75	49.05	26.18	18.87	23.34	26.72	73.45	72.14	69.51	20.72	82.86	52.33	0.54	0.57	0.68	0.39	0.37	0.35	0.64	0.67	0.62	0.47	0.34	0.41	3.15	1.08	1.1	1.02	0	0	0	0	0.862909	0.727549	0.0245734
Tb927.6.2870	27.14	21.39	15.36	13.47	4.76	3.27	30.31	31.65	23.62	9.95	13.53	5.79	2.99	2.66	2.49	2.53	1.7	0.86	4.77	5.31	4.08	1.73	4.36	1.37	9.08	8.04	6.17	5.32	2.8	3.8	6.35	5.96	5.79	5.75	3.1	4.23	2.97	0.78	1.1	1.41	0	0	0	0	0.737456	0.79083	0.167971
Tb927.9.7770	219.26	269.44	244.99	251.28	264.88	209.88	170.05	140.5	132.28	190.05	132.22	162.73	28.39	39.77	35.04	38.79	61.96	48.56	18.31	15.93	14.87	25.84	29.8	34.24	7.72	6.77	6.99	6.48	4.28	4.32	9.29	8.82	8.9	7.35	4.44	4.75	1.01	1.26	1.1	0.87	0	0	0	0	0.313568	0.820902	0.0703448
Tb927.2.1560	56.19	43.38	27.32	53.48	36.34	14.73	64.25	43.95	31.29	48.64	41.56	20.39	5.85	3.22	1.79	5.67	5.34	2.12	5.31	3.5	2.22	4.87	4.81	3.01	9.61	13.47	15.26	9.43	6.81	6.95	12.1	12.56	14.09	9.99	8.64	6.77	1.21	1.01	1.1	1.09	0	0	0	0	0.991233	0.853286	0.031461
Tb927.4.4250	47.77	48.75	50.05	42.5	28.05	28.89	71.23	62.39	58.87	49.61	27.32	28.26	20.92	17.87	17.59	19.96	16.01	18.23	20.44	16.96	17.94	19.55	17.08	15.07	2.28	2.73	2.85	2.13	1.75	1.58	3.48	3.68	3.28	2.54	1.6	1.88	1.47	1.33	1.1	0.83	0	0	0	0	0.36716	0.870466	0.0310856
Tb927.4.3170	18.22	17.78	16.84	6.54	3.06	4.93	41.13	36.96	47.97	15.84	12.82	13.05	7.97	8.03	7.37	3.57	2.52	2.75	12.12	9.09	15.68	8.23	8.67	6.78	2.29	2.21	2.28	1.83	1.21	1.79	3.39	4.07	3.06	1.92	1.48	1.92	3.64	1.55	1.1	0.71	0	0	0	0	0.481955	0.921817	0.0244448
Tb927.11.12500	64.29	66.75	67.81	57.01	67.11	62.55	73.95	75.64	76.89	77.43	60	77.81	12.7	13.44	13.66	14.91	18.68	20.52	12.12	13.62	13.64	17.87	17.69	20.77	5.06	4.97	4.96	3.82	3.59	3.05	6.1	5.55	5.64	4.33	3.39	3.75	1.07	1.15	1.1	0.96	0	0	0	0	0.458291	1.04368	0.017447
Tb927.8.5120	244.74	159.53	62.4	137.69	166.87	174.74	180.25	70.74	63.32	90.79	171.9	155.81	466.44	317.08	126.55	167.77	153.96	121.37	316.95	137.53	123.34	74.49	161.66	113.27	0.52	0.5	0.49	0.82	1.08	1.44	0.57	0.51	0.51	1.22	1.06	1.38	0.97	1.05	1.1	1.05	0	0	0	0	0.833976	1.07476	0.0240818
Tb927.8.7940	37.06	30.54	30.46	14.34	10.09	9	29.18	28.27	41.74	13.2	11.5	11.73	11.95	9.11	11.17	7.32	7.42	7.74	8.03	7.86	12.42	5.99	8.77	8.24	3.1	3.35	2.73	1.96	1.36	1.16	3.63	3.6	3.36	2.2	1.31	1.42	2.93	1.15	1.1	0.96	0	0	0	0	0.622582	1.16945	0.0247998
Tb927.2.2380	50.13	40.55	42.68	35.87	17.66	23.56	53.68	49.63	54.05	37.12	17.89	23.03	9.09	9.23	9.21	10.03	9.85	13.76	8.07	8.81	9.68	9.85	9.93	10.46	5.51	4.39	4.63	3.58	1.79	1.71	6.65	5.63	5.58	3.77	1.8	2.2	1.73	1.23	1.1	0.89	0	0	0	0	0.578127	1.35197	0.0242636
Tb927.4.4540	20.83	19.59	21.25	15.87	10.43	9.69	20.61	17.04	17.76	13.25	10.95	9.61	42.66	36.42	42.9	48.34	40.32	39.27	35.66	34.69	33.96	35.75	42.21	33.58	0.49	0.54	0.5	0.33	0.26	0.25	0.58	0.49	0.52	0.37	0.26	0.29	1.71	1.04	1.1	1.06	0	0	0	0	0.92161	1.43011	0.0177225
Tb927.3.5580	141.44	125.77	119.53	125.53	120.09	89.49	154.71	132.84	126.61	128	147.02	130.04	17.51	16.92	17.15	25.46	33.19	28.66	20.23	20.41	17.87	28.03	36.03	30.71	8.08	7.43	6.97	4.93	3.62	3.12	7.65	6.51	7.09	4.57	4.08	4.23	1.15	0.95	1.1	1.16	0	0	0	0	0.870352	1.48199	0.0166601
Tb927.11.17040	149.82	137.88	147.37	43.72	17.08	18.29	89.67	79.84	149.55	42.65	13.18	23.55	32.25	29.81	29.89	19.66	17.71	15.65	18.89	16.67	34.07	18.08	11.86	17.9	4.65	4.63	4.93	2.22	0.96	1.17	4.75	4.79	4.39	2.36	1.11	1.32	5.5	0.98	1.1	1.12	0	0	0	0	0.931364	1.63208	0.0200055
Tb927.7.3760	86.74	77.14	82.21	32.6	11.79	8.6	74.12	74.2	91.83	25.08	14.09	11.92	89.89	79.46	80.25	69.91	54.83	49.53	69.14	67.24	85.97	54.58	54.73	50.91	0.96	0.97	1.02	0.47	0.22	0.17	1.07	1.1	1.07	0.46	0.26	0.23	4.64	1.1	1.1	1	0	0	0	0	0.366402	1.89986	0.0184713
Tb927.7.6850	241.71	271.89	266.06	94.93	63.37	57.27	118.68	122.64	162.6	72.3	35.58	49.08	102.76	120.78	115.34	65.86	74.09	65.01	44.94	40.41	67.21	45.55	42.82	46.02	2.35	2.25	2.31	1.44	0.86	0.88	2.64	3.03	2.42	1.59	0.83	1.07	3.62	1.17	1.1	0.94	0	0	0	0	0.711513	1.92795	0.0175298
Tb927.10.6440	52.62	49.95	31.64	48.34	33.77	13.99	40.3	38.68	22.21	23.92	25.8	11.3	15.48	15.72	10.69	17.57	16.98	7.34	13.42	12.68	6.93	9.24	11.05	4.66	3.4	3.18	2.96	2.75	1.99	1.91	3	3.05	3.2	2.59	2.33	2.42	1.4	0.97	1.1	1.13	0	0	0	0	0.920115	2.02419	0.0140221
Tb927.2.5970	89.98	95.61	101.07	46.99	26.83	29.35	96.02	113.21	95.02	56.26	39.68	29.53	32.45	34.02	35.09	24.23	27.12	38.93	28.55	32.59	33.81	31.13	29.85	32.64	2.77	2.81	2.88	1.94	0.99	0.75	3.36	3.47	2.81	1.81	1.33	0.9	2.78	1.14	1.1	0.96	0	0	0	0	0.753879	2.24122	0.0164951
Tb927.2.2440	116.62	106.7	101.33	76.32	60.7	39.04	138.74	121.07	123.34	72.56	90.21	69.61	16.02	14.52	12.26	12.95	15.04	11.12	17.22	16.09	13.94	13.3	20.27	14.37	7.28	7.35	8.27	5.89	4.04	3.51	8.06	7.52	8.85	5.46	4.45	4.84	1.84	1.07	1.1	1.03	0	0	0	0	0.856594	2.5761	0.0140519
Tb927.8.1500	87.98	82.17	89.94	56.66	30.13	29.81	89.63	89.06	106.66	50.32	27.82	41.68	94.29	84.53	96.18	73.31	62.3	72.75	74.83	71.73	96.98	67.84	53.62	74.23	0.93	0.97	0.94	0.77	0.48	0.41	1.2	1.24	1.1	0.74	0.52	0.56	2.23	1.25	1.1	0.88	0	0	0	0	0.382257	2.64693	0.0144716
Tb927.9.11720	32.21	31.53	33.51	19.92	15.28	9.57	43.93	41.93	39.45	20.06	25.49	19.03	46.03	45.7	46.91	39.23	39.55	34.34	59.28	59.67	57.02	49.05	52.15	47.76	0.7	0.69	0.71	0.51	0.39	0.28	0.74	0.7	0.69	0.41	0.49	0.4	2.17	1.01	1.1	1.09	0	0	0	0	0.932132	2.76211	0.0137333
Tb927.3.1570	19.76	17.87	17.24	3.31	0.78	0.8	22.49	27.61	30.36	2.74	3.04	1.32	14.24	11.86	12.09	6.89	3.54	3.73	14.88	18.23	20.76	5.43	11.25	5.84	1.39	1.51	1.43	0.48	0.22	0.21	1.51	1.51	1.46	0.5	0.27	0.23	11.22	1.03	1.1	1.07	0	0	0	0	0.823646	2.99106	0.0146385
Tb927.9.10790	29.76	32.99	31.07	7.32	2.18	1.2	39.88	43.83	55.83	8.89	7.75	6.08	80.56	85.86	76.19	37.62	20.23	12.61	91.3	104.45	130.54	48.13	61.07	46.02	0.37	0.38	0.41	0.19	0.11	0.1	0.44	0.42	0.43	0.18	0.13	0.13	8.77	1.11	1.1	0.99	0	0	0	0	0.481309	5.51019	0.011259
Tb927.10.460	24.69	26.12	22.04	9.94	4.46	4.41	34.15	39.55	48.57	7.62	6.84	6.03	20.83	18.77	16.84	15.34	12.03	14.91	21.78	26.13	35	11.68	15.56	16.58	1.19	1.39	1.31	0.65	0.37	0.3	1.57	1.51	1.39	0.65	0.44	0.36	3.87	1.15	1.1	0.96	0	0	0	0	0.540886	6.09443	0.0111609
Tb927.6.3000	40.8	28.91	30.2	3.18	0.92	0.17	36.24	27.28	40.52	1.83	1.93	0.8	110.31	73.28	70.96	24.76	16.59	16.97	94.85	62.06	110.26	13.76	34.61	23.6	0.37	0.39	0.43	0.13	0.06	0.01	0.38	0.44	0.37	0.13	0.06	0.03	23.4	1	1.1	1.1	0	0	0	0	1.00176	7.35823	0.0110877
Tb927.7.2160	62.09	38.87	17.63	10.98	7.76	4.87	33.07	13.87	20.46	3.86	6.54	5.42	93.88	56.35	26.4	26.37	17.61	16.57	41.8	18.6	27.99	8.23	16.88	13.19	0.66	0.69	0.67	0.42	0.44	0.29	0.79	0.75	0.73	0.47	0.39	0.41	5.02	1.12	1.1	0.98	0	0	0	0	0.391593	8.85314	0.0101004
Tb927.9.3490	24.74	27.28	24.66	8.89	5.63	4.82	22.28	25.1	30.07	7.16	8.26	7.39	45.57	40.46	39.27	31.56	27.8	32.96	36.33	43.95	55.76	26.56	37.55	36.93	0.54	0.67	0.63	0.28	0.2	0.15	0.61	0.57	0.54	0.27	0.22	0.2	3.96	0.93	1.1	1.18	0	0	0	0	0.870061	21.8684	0.00956909
Tb927.10.13920	46.57	44.07	41.81	65.56	65.46	47.64	52.3	48.93	36.22	75.1	75.51	60.57	23.16	21.48	20.9	34.56	41	29.41	25.58	24.57	18.94	39.86	41.91	32.22	2.01	2.05	2	1.9	1.6	1.62	2.04	1.99	1.91	1.88	1.8	1.88	0.74	0.98	1.09	1.11	0	0	0	0	0.864146	0.312241	0.0688946
Tb927.7.7350	25.27	27.36	31.46	31.12	29.65	35.26	26.88	30.82	35.26	40.16	29.44	40.6	54.58	58.29	61.01	68.08	72.73	86.85	57.81	61.94	61.06	79.11	70.24	88.03	0.46	0.47	0.52	0.46	0.41	0.41	0.46	0.5	0.58	0.51	0.42	0.46	0.88	1.06	1.09	1.03	0	0	0	0	0.90277	0.32489	0.336498
Tb927.10.5480	449.63	459.12	485.57	942.84	1192.62	1341.62	443.07	467.83	337.63	1017.48	1233.2	1196.71	200.29	223.91	219.11	509.49	712.25	873.93	204.58	223.58	149.89	550.25	678.88	651.39	2.24	2.05	2.22	1.85	1.67	1.54	2.17	2.09	2.25	1.85	1.82	1.84	0.4	1	1.09	1.09	0	0	0	0	1.01224	0.378886	0.0255898
Tb927.5.4370	15.27	18.34	21.99	20.44	25.47	27.35	23.83	29.92	21.8	32.5	43.99	29.11	7.72	9.97	9.95	10.33	16.16	16.8	11.33	14.82	10.83	15.64	24.22	16.67	1.98	1.84	2.21	1.98	1.58	1.63	2.1	2.02	2.01	2.08	1.82	1.75	0.76	1.02	1.09	1.07	0	0	0	0	0.969208	0.419909	0.26217
Tb927.11.3310	87.28	52.53	15.1	27.68	30.28	31.36	85.91	52.96	37.04	25.59	79.41	49.08	67.94	42.01	12.66	18.66	19.07	17.31	63.96	37.45	28.58	12.95	49.92	28.02	1.28	1.25	1.19	1.48	1.59	1.81	1.34	1.41	1.3	1.98	1.59	1.75	1.73	1.09	1.09	1	0	0	0	0	0.512206	0.452005	0.0654889
Tb927.9.14140	77.48	75.38	69.91	73.23	88.75	87.2	88.66	83.29	77.59	94.95	119.14	113.7	31.17	31.66	27.97	30.99	33.72	27.58	30.56	31.69	31.7	31.63	42.97	36.97	2.49	2.38	2.5	2.36	2.63	3.16	2.9	2.63	2.45	3	2.77	3.08	0.89	1.08	1.09	1.01	0	0	0	0	0.799889	0.467228	0.164709
Tb927.6.4580	64.04	50.94	64.32	81.77	58.03	48.9	65.38	56.96	43.01	78.96	71.51	48.61	17.1	14.26	19.99	25.76	20.14	19.61	17.85	15.56	12.72	24.93	22.45	16.63	3.75	3.57	3.22	3.17	2.88	2.49	3.66	3.66	3.38	3.17	3.19	2.92	0.95	1.02	1.09	1.07	0	0	0	0	0.967888	0.500689	0.0304656
Tb927.5.4200	51.38	66.32	69.04	54.09	65.6	78.25	74.7	109.92	60.95	79.92	109.62	100.93	39.3	72.03	78.33	50.21	79.04	87.08	55.68	92.02	63.43	65.4	116.1	112.62	1.31	0.92	0.88	1.08	0.83	0.9	1.34	1.19	0.96	1.22	0.94	0.9	0.94	1.12	1.09	0.97	0	0	0	0	0.901311	0.561917	0.404509
Tb927.11.9210	73.75	58.16	70.08	67.43	57.01	74.07	70.56	54.16	63.73	71.95	49.46	72.02	14.86	14.35	14.79	12.2	12.86	17.6	14.05	14.07	15.16	11.78	10.85	15.17	4.96	4.05	4.74	5.53	4.43	4.21	5.02	3.85	4.2	6.11	4.56	4.75	1.02	0.95	1.09	1.15	0	0	0	0	0.938742	0.577329	0.281458
Tb927.3.5180	102.97	89.9	70.78	48.34	41.63	21.21	111.11	101.89	87.05	36.51	80.02	44.32	112.01	100.94	72.61	58.97	55.85	35.6	117.8	104.32	94.54	43.67	110.48	55.29	0.92	0.89	0.97	0.82	0.75	0.6	0.94	0.98	0.92	0.84	0.72	0.8	2.37	1.02	1.09	1.07	0	0	0	0	0.915859	0.607625	0.0376179
Tb927.8.595	49.64	40.42	38.66	51.26	42.51	22.59	52.3	41.07	32.22	47.07	60.51	33.91	36.77	32.94	29.54	44.81	41.78	27.69	38.04	28.85	24.47	39.25	54.17	36.88	1.35	1.23	1.31	1.14	1.02	0.82	1.37	1.42	1.32	1.2	1.12	0.92	1.11	1.06	1.09	1.03	0	0	0	0	0.745608	0.61599	0.0708974
Tb927.3.3000	84	83.03	81.87	43.81	34.35	46.67	79.13	83.83	104.25	38.79	41.1	51.72	39.63	41.32	42.94	29.68	24.02	23.33	36.16	41.11	52.87	25.84	24.33	23.93	2.12	2.01	1.91	1.48	1.43	2	2.19	2.04	1.97	1.5	1.69	2.16	1.99	1.03	1.09	1.06	0	0	0	0	0.930967	0.642577	0.296649
Tb927.7.5790	50.09	25.6	6.81	7.98	7.23	6.42	63.46	30.86	21.72	8.23	21.39	12.91	40.13	21.18	5.41	7.02	5.63	4.3	47.95	25.27	18.46	6.6	18.85	6.88	1.25	1.21	1.26	1.14	1.28	1.49	1.32	1.22	1.18	1.25	1.13	1.88	3.81	1	1.09	1.09	0	0	0	0	1.00608	0.695012	0.533228
Tb927.3.2650	59.6	55.71	57.21	52.17	39.89	26.03	63.29	53.29	39.63	51.03	39.38	27.46	119.82	129.63	129	128.8	124.56	87.94	128.13	120.78	94.43	106.88	130.75	80.3	0.5	0.43	0.44	0.41	0.32	0.3	0.49	0.44	0.42	0.48	0.3	0.34	1.46	0.99	1.09	1.1	0	0	0	0	0.977285	0.70028	0.307902
Tb927.9.11000	78.02	67.35	34.65	29.38	25.43	8.54	88.92	76.3	82.08	23.76	57.32	25.1	15.98	13.44	7.85	6.06	5.48	3.1	16.89	14.77	17.72	4.93	12.62	6.31	4.88	5.01	4.41	4.85	4.64	2.75	5.26	5.17	4.63	4.82	4.54	3.98	2.84	1.05	1.09	1.04	0	0	0	0	0.862638	0.701488	0.159263
Tb927.9.15460	109.32	94.84	51.71	8.76	7.38	8.89	83.27	87.9	102.47	12.9	16.32	14.74	60.84	49.7	21.82	8.33	7.28	7.57	58.23	36.21	43.3	8.78	19.31	12.39	1.8	1.91	2.37	1.05	1.01	1.17	1.43	2.43	2.37	1.47	0.85	1.19	10.22	1.02	1.09	1.07	0	0	0	0	0.988618	0.740859	0.0993283
Tb927.11.9670	53.41	63.87	56.86	65.08	61.43	85.25	67.93	86.01	62.13	86.42	63.35	85.25	28.72	33.5	30.55	39.84	50.9	61.63	29.47	40.12	31.59	49.96	47.28	56.61	1.86	1.91	1.86	1.63	1.21	1.38	2.31	2.14	1.97	1.73	1.34	1.51	0.82	1.14	1.09	0.96	0	0	0	0	0.640093	0.83215	0.025174
Tb927.3.4900	83.13	70.74	78.11	93.02	78.75	72.75	83.06	73.46	71.25	90.84	87.01	69.8	1.49	0.99	1.83	2.62	3.69	3.61	2.17	1.32	1.26	2.74	3.75	2.54	55.79	71.45	42.68	35.5	21.34	20.15	38.28	55.65	56.55	33.15	23.2	27.48	0.95	0.89	1.09	1.22	0	0	0	0	0.924691	0.866464	0.0559312
Tb927.3.2477	13.2	11.94	8.42	8.8	11.89	24.37	8.36	5.43	5.38	5.03	11.45	10.88	44.95	38.96	25.53	24.58	27.41	30.21	24.2	15.93	15.01	10.05	20.78	15.64	0.29	0.31	0.33	0.36	0.43	0.81	0.35	0.34	0.36	0.5	0.55	0.7	0.74	1.13	1.09	0.96	0	0	0	0	0.49193	0.898676	0.0693585
Tb927.5.1230	63.62	64.34	45.38	24.19	23.78	11.18	67.43	65.39	79.67	17.62	44.34	29.01	12.24	13.32	9.34	6.97	10.19	8.31	12.62	15.19	19.13	6.5	16.12	12.34	5.2	4.83	4.86	3.47	2.33	1.35	5.34	4.3	4.16	2.71	2.75	2.35	2.93	0.93	1.09	1.17	0	0	0	0	0.874987	1.06734	0.0331095
Tb927.11.16500	46.36	46.17	45.73	47.29	44.83	31.82	50.46	46.21	47.27	43.67	48.4	39.52	5.1	4.85	4.71	6.45	9.27	8.66	5.14	4.65	5.08	6.35	8.51	8.38	9.09	9.52	9.71	7.33	4.84	3.67	9.82	9.94	9.31	6.88	5.69	4.72	1.12	1.03	1.09	1.06	0	0	0	0	0.861679	1.12167	0.0269262
Tb927.1.3670	15.4	12.24	17.59	6.67	4.08	2.98	15.13	13.75	21.95	4.87	6.89	5.04	2.7	2.28	2.18	1.96	1.8	1.2	2.3	2.51	3	1.47	2.23	2.03	5.7	5.37	8.07	3.4	2.27	2.48	6.58	5.48	7.32	3.31	3.09	2.48	3.29	1.01	1.09	1.08	0	0	0	0	0.991289	1.13548	0.0213024
Tb927.10.7310	56.82	53.95	54.5	44.9	43.52	44.49	58.23	62.22	63.73	58.54	39.93	54.26	7.22	6.49	7.03	9.28	12.47	14.62	6.31	7.16	7.93	10.26	13.18	15.02	7.87	8.31	7.75	4.84	3.49	3.04	9.23	8.69	8.04	5.71	3.03	3.61	1.24	1.08	1.09	1.01	0	0	0	0	0.737996	1.14882	0.0281745
Tb927.10.11710	46.11	44.28	49.75	31.73	22.51	14.1	32.65	30.45	44.12	18.69	19.51	17.1	57.94	53.13	60.31	52.7	44.88	34.57	39.75	36.59	50.79	30.06	37.15	34.05	0.8	0.83	0.82	0.6	0.5	0.41	0.82	0.83	0.87	0.62	0.53	0.5	2.05	1.03	1.09	1.06	0	0	0	0	0.81693	1.29412	0.0180111
Tb927.7.5980	77.82	65.25	65.11	39.53	14.9	11.75	80.85	66.17	75.7	32.29	21.69	16.44	1.2	1.25	1.05	1.53	1.36	0.46	1.21	0.95	0.85	1.22	1.11	0.75	64.85	52.2	62.01	25.84	10.96	25.54	66.82	69.65	89.06	26.47	19.54	21.92	3.15	1.26	1.09	0.87	0	0	0	0	0.698095	1.37502	0.0220191
Tb927.10.12890	331.56	332.93	327.29	206.34	124.85	95.57	256.71	250.21	286.95	154.31	84.38	99.76	33.12	35.05	33.82	30.51	24.12	17.37	24.33	22.06	28.73	20.46	15.15	17.14	10.01	9.5	9.68	6.76	5.18	5.5	10.55	11.34	9.99	7.54	5.57	5.82	2.32	1.09	1.09	1	0	0	0	0	0.682758	1.4444	0.0177804
Tb927.7.6260	74.25	68.51	74.58	34.17	17.86	13.42	86.66	87.82	95.76	40.32	23.31	28.07	131.73	133.97	131.61	109.23	98.45	78.48	145.81	151.11	165.61	128.26	125.63	130.42	0.56	0.51	0.57	0.31	0.18	0.17	0.59	0.58	0.58	0.31	0.19	0.22	3.32	1.07	1.09	1.02	0	0	0	0	0.746074	1.47416	0.0204273
Tb927.9.11660	33.49	38.31	41.33	25.76	18.1	17.6	38	46.67	43.08	26.86	25.39	19.78	15.4	19.46	17.46	18.7	23	21.67	18.18	20.74	18.35	19.24	26.05	22.42	2.17	1.97	2.37	1.38	0.79	0.81	2.09	2.25	2.35	1.4	0.97	0.88	1.84	1.03	1.09	1.06	0	0	0	0	0.953335	1.61008	0.0191366
Tb927.11.11770	43.04	37.54	42.33	9.28	2.13	1.15	27.21	27.08	37.59	4.27	1.77	2.21	93.71	74.65	88.37	35.22	15.72	9.06	59.49	49.88	86.27	16.1	13.53	12.29	0.46	0.5	0.48	0.26	0.14	0.13	0.46	0.54	0.44	0.27	0.13	0.18	9.79	1	1.09	1.09	0	0	0	0	1.00352	2.14154	0.0169206
Tb927.7.3290	62.25	55.97	63.76	72.36	76.37	135.24	68.31	70.74	59.69	99.11	77.59	118.83	5.4	4.85	5.8	8.72	9.8	21.44	5.69	5.51	5	11.07	10.34	14.79	11.53	11.54	10.99	8.3	7.79	6.31	12.01	12.84	11.94	8.95	7.5	8.03	0.64	1.08	1.09	1.01	0	0	0	0	0.53761	2.2751	0.012431
Tb927.11.10060	228.43	290.15	277.54	234.85	213.74	143.15	208.01	249.22	180.14	199.55	168.05	152.93	115.92	140.03	125.46	145.84	169.44	133.35	96.4	107.49	80.3	124.4	125.28	113.89	1.97	2.07	2.21	1.61	1.26	1.07	2.16	2.32	2.24	1.6	1.34	1.34	1.35	1.08	1.09	1.01	0	0	0	0	0.698477	2.33692	0.0141165
Tb927.7.6630	45.57	38.96	33.43	11.16	3.78	3.1	61.33	77.61	79.52	13.76	9.93	11.73	38.02	32.47	30.11	21.97	19.85	19.32	58.11	68.93	65.25	28.38	69.38	36.6	1.2	1.2	1.11	0.51	0.19	0.16	1.06	1.13	1.22	0.48	0.14	0.32	6.54	0.97	1.09	1.12	0	0	0	0	0.929837	2.47848	0.0162743
Tb927.10.13490	55.94	53.78	53.54	32.69	17.86	12.56	64.17	69.43	64.29	31.33	24.98	21.81	81.63	83.8	82.48	91.75	102.82	100.9	89.79	98.15	94.72	100.74	117.12	114.59	0.69	0.64	0.65	0.36	0.17	0.12	0.71	0.71	0.68	0.31	0.21	0.19	2.59	1.06	1.09	1.03	0	0	0	0	0.623478	2.98685	0.0146848
[truncated: 4,414 more rows]

[truncated: 3 more sheets: 3. RPM all no ncRNA, 4. Raw reads, 5. Cyt vs Tot]
