# Supplementary material
Source: HighWire-hosted journal article supplement (doi:10.1101/rna.079258.122)
Supplement: Supplemental_Table_S5.xlsx [file Supplemental_Table_S5.xlsx]

## Sheet: Legend
Table S5 - comparison of CDS and 3'-UTR reads.
1. Genes for which RNAi caused preferential loss of UTR reads in both bloodstream and procyclic forms. The log2 fold change for the UTR was subtracted from the log2 fold change for the CDS, then re-converted to non-log fold change values. REsults of at least 1.5 (for bloodstream forms) or 2.0 (for procyclic forms) are shown.
2. Genes for which RNAi caused preferential loss of UTR reads. The log2 fold change for the UTR was subtracted from the log2 fold change for the CDS, then re-converted to non-log fold change values. REsults of at least 1.5 (for bloodstream forms) or 2.0 (for procyclic forms) are shown.
3. Examples of genes for which RNAi caused preferential increase of UTR reads.
4. DeSeq2 analysis for bloodstream forms and procyclic forms for the set of unique genes (no paralogues), with published developmental regulation results for growth-arrested forms.
5. DeSeq2 analysis for all gene segments, together with DRBD18 RNA binding results.
6. Read counts used to make Figures 6 and 7 and supplementary Figures S7-29.
KEY
RNAI
2x significantly (padj <0.05) increased
1.5x significantly (padj <0.05) increased
2x significantly (padj <0.05) decreased
1.5x significantly (padj <0.05) decreased
Pull-down
bound/unbound RPM >2 in all three replicates
UTR versus coding region
3' UTR change 2x less than CDS change
3' UTR change 1.5x less than CDS change
WC- whole cell
CYT - cytoplasm
BS - bloodstream form
PC- procyclic form

## Sheet: 1. Strongest loss of 3'-UTR
GeneID	Annotation2	Category	BS FoldChange CDS/UTR	PC foldchange WC CDS/UTR	PC foldchange cyt CDS/UTR	RIP lowest bound/unboud (CDS)	RIP lowest bound/unboud (UTR)	annotated 3UTR length	detailed analysis	PC WC CDS log2FoldChange +tet/-tet	PC CYT CDS log2FoldChange +tet/-tet	BS WC CDS log2FoldChange +tet/-tet	PC WC UTR log2FoldChange +tet/-tet	PC CYT UTR log2FoldChange +tet/-tet	BS WC UTR log2FoldChange +tet/-tet	PC CYT - PC WC
Tb927.1.3450	hypothetical protein, conserved	ZUnknown	2.48	1.34	2.26	1.68	1.77	1311	0	-0.6661	0.1081	-0.6691	-1.085	-1.0691	-1.9777	0.7742
Tb927.11.4430	ferric reductase, putative,ferric reductase transmembrane component, putative	Enzyme	1.66	1.64	2.6	0.86	1.1	1496	0	-0.4688	0.4866	-0.5016	-1.1803	-0.8898	-1.2321	0.9554
Tb927.11.6120	ABC transporter, putative	Transporter	1.6	2.09	2.66	0.52	0.83	1758	0	1.7691	2.255	-0.3911	0.7081	0.843	-1.0697	0.4859
Tb927.10.3230	protein kinase, putative	Protein.kinase	2.07	2.23	2.55	1.27	1.71	595	0	0.8276	1.1313	0.1742	-0.3281	-0.2178	-0.8731	0.3037
Tb927.11.2500	carboxypeptidase, putative,metallo-peptidase, Clan MA(E) Family M32	Protease	2.26	1.86	2.32	1.08	1.05	554	1	-0.1955	0.4847	0.2009	-1.0926	-0.7321	-0.9762	0.6802
Tb927.11.13120	PUB domain containing protein, putative	ZUnknown	1.54	1.79	2.23	0.72	1.5	0	0	-0.0527	0.1713	0.2022	-0.8908	-0.9871	-0.4177	0.224
Tb927.8.7720	hypothetical protein, conserved	ZUnknown	1.6	1.88	4.48	1.39	1.17	2764	0	0.9921	2.351	0.2085	0.0785	0.1881	-0.4665	1.3589
Tb927.10.1500	methionyl-tRNA synthetase, putative (MetRS)	Translation.tRNA	2.05	2.09	2.45	0.33	0.95	690	1	0.0306	0.4725	0.2291	-1.0355	-0.8176	-0.8031	0.4419
Tb927.9.4230	fatty acyl CoA synthetase 4 (ACS4)	Lipids	2.24	2.06	2.73	0.38	1.17	855	1	0.1326	0.4613	0.2353	-0.9076	-0.9854	-0.9302	0.3287
Tb927.10.14930	ZC3H39	RNA.binding	1.58	1.85	3.01	0.9	0.84	3450	0	1.9202	2.6729	0.2759	1.033	1.0811	-0.3869	0.7527
Tb927.8.870	serine/threonine kinase, putative,protein kinase, putative	Protein.kinase	1.99	2.78	2.7	1.18	0.98	5585	0	2.3763	2.1283	0.2777	0.9024	0.6978	-0.716	-0.248
Tb927.11.16780	hypothetical protein	ZUnknown	2.14	2.22	6.71	0.84	1.16	1976	0	3.492	4.9881	0.3635	2.3433	2.2412	-0.7368	1.4961
Tb927.9.12690	prenyl protein specific carboxyl methyltransferase	Prenylation	1.68	1.53	2.97	2.06	1.79	826	0	0.7319	2.1723	0.3677	0.1167	0.6034	-0.379	1.4404
Tb927.11.9920	polyubiquitin, putative	Ubiquitin.proteasome	4.25	2.97	3.72	0.28	1.62	950	0	0.5248	0.5202	0.4183	-1.0448	-1.3733	-1.6693	-0.0046
Tb927.9.8370	hypothetical protein, conserved	ZUnknown	1.78	1.78	2.82	0.95	0.95	774	1	0.4248	1.06	0.4185	-0.4086	-0.4344	-0.4148	0.6352
Tb927.10.14390	POB3 component of FACT complex	Chromatin	2.2	1.95	2.57	0.88	1.37	602	1	0.6674	1.2697	0.4667	-0.294	-0.0948	-0.6685	0.6023
Tb927.10.12750	hypothetical protein	ZUnknown	1.74	2.68	2.24	8.95	1.81	766	0	1.6902	1.7677	0.4783	0.2658	0.6048	-0.3181	0.0775
Tb927.11.15030	small GTPase (X3)	Vesicular.transport	2.03	1.87	4.78	1.91	1.52	1377	0	1.7546	3.3306	0.4854	0.855	1.0728	-0.5344	1.576
Tb11.v5.0745	hypothetical protein, conserved	ZUnknown	2.34	2.21	3.54	1.18	1.27	5409	0	0.5149	1.1266	0.4932	-0.6269	-0.6987	-0.7349	0.6117
Tb927.5.1130	hypothetical protein, conserved	Mito.pathway	2.16	2.69	20.4	1.25	1.3	2504	1	1.3373	4.5477	0.506	-0.0896	0.1971	-0.6025	3.2104
Tb927.11.2400	Flabarin-like	Cytoskeleton	1.67	2.91	5.38	1.53	2.03	11186	0	1.6052	2.5724	0.5108	0.0624	0.1455	-0.2332	0.9672
Tb927.8.6340	CYC10, CYC2-like cyclin	Cell.cycle	1.61	4.09	6.35	1.5	1.15	2948	0	2.6638	3.5825	0.547	0.633	0.915	-0.14	0.9187
Tb927.6.820	PUF4	RNA.binding	2.02	2.42	3.82	0.93	0.87	3033	0	4.3159	4.3135	0.5998	3.0392	2.3809	-0.4154	-0.0024
Tb927.11.5450	malic enzyme	Mito.pathway	1.94	2.26	3.88	0.68	0.55	1094	1	1.0335	2.8018	0.624	-0.144	0.8458	-0.3326	1.7683
Tb927.4.2500	eIF2K2 eukaryotic translation initiation factor 2-alpha kinase	Protein.kinase	2.18	2.32	6.21	0.98	0.96	1960	0	1.8526	3.444	0.6291	0.6406	0.8089	-0.4976	1.5914
Tb927.6.5090	hypothetical protein, conserved	ZUnknown	1.51	1.55	2.82	1.28	2	665	0	0.5833	1.5903	0.6885	-0.0532	0.0925	0.0958	1.007
Tb927.2.3720	ubiquitin-conjugating enzyme, putative	Ubiquitin.proteasome	1.68	1.73	2.08	1.74	1.26	2685	0	2.2865	2.6714	0.7604	1.4972	1.616	0.0146	0.3849
Tb927.11.10470	hypothetical protein, conserved	ZUnknown	2.06	1.87	4.56	0.89	1.02	1595	0	1.3	2.2342	0.7731	0.3988	0.0442	-0.2715	0.9342
Tb927.10.15620	hypothetical protein	ZUnknown	1.58	3.71	7.82	0.5	1.21	1304	0	3.1176	3.6139	0.8004	1.2278	0.6475	0.1396	0.4963
Tb927.8.4700	AAT5 Arginine transporter	Amino.acid.transport	4.2	1.54	3.08	0.96	1.34	1730	0	0.7945	1.3428	0.9224	0.1759	-0.2812	-1.1489	0.5483
Tb927.9.9370	PSP1 C-terminal conserved region, putative	ZUnknown	1.68	5.59	19.11	1.49	1.11	3859	0	3.2891	6.3101	0.9356	0.8074	2.0542	0.1843	3.021
Tb927.4.4810	hypothetical protein, conserved	Vesicular.transport	2.46	1.94	2.92	1.2	2.21	763	0	1.088	1.7515	1.0069	0.1304	0.2059	-0.2896	0.6635
Tb927.9.10950	chaperone DNAj, putative, J43	Chaperone	1.55	2.28	5.62	1.34	0.89	2655	0	2.2025	3.416	1.0116	1.0123	0.925	0.3808	1.2135
Tb11.v5.0569	amino acid transporter, putative	Transporter	1.66	1.62	2.57	1.07	1.44	4149	0	0.8203	1.5485	1.1291	0.125	0.1873	0.3974	0.7282
Tb927.4.1390	hypothetical protein, conserved	ZUnknown	1.57	1.66	2.12	0.67	0.94	1030	0	1.183	1.6752	1.1299	0.4489	0.5878	0.4774	0.4922
Tb927.8.1580	hypothetical protein, conserved	ZUnknown	2.26	2.65	3.08	2.01	1.75	1004	1	1.7467	2.5715	1.1718	0.3422	0.9475	-0.0048	0.8248
Tb927.6.220	purine nucleoside transporter NT9	Nucleotides	1.54	1.25	4.87	1.57	2.72	1073	0	1.1159	2.7932	1.2314	0.7895	0.5085	0.6095	1.6773
Tb927.11.15010	NEK21 protein kinase	Protein.kinase	1.57	2.02	2.98	2.28	3	2213	0	1.4473	1.999	1.2328	0.436	0.4234	0.5828	0.5517
Tb927.8.970	hypothetical protein	ZUnknown	1.58	2.03	2.75	1.54	1.89	982	0	1.2398	1.8238	1.2394	0.2168	0.3621	0.5826	0.584
Tb927.9.4310	tricarboxylate carrier, putative	Mito.membrane	1.8	2.59	3.67	1.14	1.42	2788	0	2.3379	3.398	1.3688	0.9664	1.5236	0.5207	1.0601
Tb927.11.13940	ubiquitin-conjugating enzyme e2, putative	Ubiquitin.proteasome	1.65	1.93	3.09	1.83	2.06	2810	1	2.0564	2.9652	1.5649	1.1094	1.3366	0.8424	0.9088
Tb927.7.3020	Nitroreductase family, putative	ZUnknown	2.34	1.91	2.54	0.98	1.41	650	1	-0.3586	0.4694	1.7321	-1.2911	-0.8737	0.503	0.828
Tb927.7.2980	Nitroreductase family, putative	ZUnknown	2.34	1.92	2.63	1.12	1.37	653	0	-0.3229	0.5404	1.7622	-1.267	-0.8543	0.5373	0.8633
Tb927.8.4300	hypothetical protein	ZUnknown	5.63	3.42	8.34	1.3	1.72	906	0	3.0142	4.3639	1.8732	1.24	1.3046	-0.6212	1.3497
Tb927.7.1810	hypothetical protein, conserved	ZUnknown	1.96	1.66	2.35	2.1	3.17	562	1	1.5918	2.2599	1.9117	0.8606	1.0277	0.9397	0.6681
Tb927.5.3440	hypothetical protein, conserved	ZUnknown	1.7	1.87	2.36	1.19	1.05	525	0	1.7789	2.7665	1.9464	0.8723	1.5265	1.1808	0.9876
Tb927.7.1850	hypothetical protein, conserved	ZUnknown	2.13	1.76	2.41	1.89	3.22	562	0	1.6128	2.1836	1.9773	0.7936	0.9163	0.8875	0.5708
Tb927.8.5930	hypothetical protein	ZUnknown	3.96	1.41	3.13	1.67	1.32	2600	0	1.5978	2.2861	2.0276	1.1052	0.6392	0.0429	0.6883
Tb927.7.6710	hypothetical protein	ZUnknown	2.93	3.32	4.85	2.37	3.01	400	0	0.6849	1.2137	0.2089	-1.0451	-1.0631	-1.3402	0.5288
Tb927.11.16820	hypothetical protein, conserved	ZUnknown	1.7	5.41	24.67	1.13	1.33	4111	0	1.8518	4.4095	0.1282	-0.5839	-0.2149	-0.6365	2.5577
Tb927.8.5240	Domain of unknown function DUF221, putative	ZUnknown	1.88	1.51	2.02	0.66	0.73	813	0	0.1334	0.6935	-0.0867	-0.4649	-0.3185	-0.9944	0.5601
Tb927.6.1510	lysyl-tRNA synthetase, putative	Translation.tRNA	1.91	1.43	2.54	1.3	1.32	627	1	0.1441	1.1494	0.0778	-0.3683	-0.1937	-0.8588	1.0053
Tb927.5.1660	protein phosphatase 2C, putative	Protein.phosphatase	3.13	2.14	2.88	1.01	1.52	1176	0	0.2882	1.285	0.041	-0.8087	-0.2414	-1.6064	0.9968

## Sheet: 2. UTR less than CDS all
GeneID	Annotation2	Category	BS FoldChange CDS/UTR	PC log2foldchange WC CDS/UTR	PC log2foldchange cyt CDS/UTR	RIP lowest bound/unboud	RIP log2 average bound/unboud (unique only)	3UTR length from CDS	BS 1.5x less UTR than CDS, whole cell	PC 1.5x less UTR than CDS, whole cell	PC 1.5x less UTR vs CDS, cyt	BS WC CDS log2FoldChange +tet/-tet	BS WC CDS padj +tet/-tet	BS WC UTR log2FoldChange +tet/-tet	BS WC UTR padj +tet/-tet	PC WC CDS log2FoldChange +tet/-tet	PC WC CDS padj +tet/-tet	PC CYT CDS log2FoldChange +tet/-tet	PC CYT CDS padj +tet/-tet	PC WC UTR log2FoldChange +tet/-tet	PC WC UTR padj +tet/-tet	PC CYT UTR log2FoldChange +tet/-tet	PC CYT UTR padj +tet/-tet	PC CDS log2FoldChange CYT - WC	BS CDS up >1.5x	BS CDS down >1.5x	BS UTR up >1.5x	BS UTR down >1.5x	PC CDS WC up >2x	PC CDS WC down >2x	PC CDS CY up >2x	PC CDS CY down >2x	PC UTR WC up >2x	PC UTR WC down >2x	PC UTR CY up >2x	PC UTR CY down >2x	PC CY/WC fold change >1.5x (more in CYT)	PC CY/WC fold change <0.67x (retention in nucleus)	Unique list		BS CDS up >1.5x	BS CDS down >1.5x	BS UTR up >1.5x	BS UTR down >1.5x	PC CDS WC up >2x	PC CDS WC down >2x	PC CDS CY up >2x	PC CDS CY down >2x	PC UTR WC up >2x
Tb927.10.12750	hypothetical protein	ZUnknown	1.74	2.68	2.24	8.95	3.9424	766	1	1	1	0.4783	0.0227	-0.3181	0.101	1.6902	1e-05	1.7677	3.2e-05	0.2658	1	0.6048	0.48	0.0775	0	0	1	0	1	0	1	0	0	0	0	0	0	0	1		65	17	101	69	99	0	153	0	42
Tb927.11.490	hypothetical protein, conserved	ZUnknown	3.24	2	1.82	2.77	2.0215	566	1	1	1	1.9022	4.31e-83	0.2041	0.145	1.575	6.9e-05	1.839	3.2e-06	0.5773	0.48	0.9756	0.036	0.264	1	0	1	0	1	0	1	0	0	0	0	0	0	0	1		48	10	71	50	79	0	123	0	37
Tb927.7.6710	hypothetical protein	ZUnknown	2.93	3.32	4.85	2.37	2.6167	400	1	1	1	0.2089	0.167	-1.3402	4.34e-10	0.6849	0.056	1.2137	1.6e-05	-1.0451	5.2e-05	-1.0631	9.2e-05	0.5288	0	0	0	1	0	0	1	0	0	1	0	1	0	0	1
Tb927.11.15010	NEK21 protein kinase	Protein.kinase	1.57	2.02	2.98	2.28	2.7485	2213	1	1	1	1.2328	2.37e-57	0.5828	3.19e-06	1.4473	0.0023	1.999	9.5e-06	0.436	0.26	0.4234	0.22	0.5517	1	0	0	0	1	0	1	0	0	0	0	0	0	0	1
Tb927.7.1810	hypothetical protein, conserved	ZUnknown	1.96	1.66	2.35	2.1	2.3877	562	1	1	1	1.9117	3.14e-97	0.9397	4.95e-14	1.5918	1.3e-05	2.2599	3.8e-11	0.8606	0.00084	1.0277	2.3e-05	0.6681	1	0	1	0	1	0	1	0	0	0	1	0	1	0	1
Tb927.9.12690	prenyl protein specific carboxyl methyltransferase	Prenylation	1.68	1.53	2.97	2.06	1.593	826	1	1	1	0.3677	0.00197	-0.379	0.00766	0.7319	0.2	2.1723	6.7e-10	0.1167	1	0.6034	0.03	1.4404	0	0	0	0	0	0	1	0	0	0	0	0	1	0	1
Tb927.8.1580	hypothetical protein, conserved	ZUnknown	2.26	2.65	3.08	2.01	1.2306	1004	1	1	1	1.1718	1.19e-33	-0.0048	0.973	1.7467	4.3e-17	2.5715	2.8e-36	0.3422	0.13	0.9475	1.3e-10	0.8248	1	0	1	0	1	0	1	0	0	0	0	0	1	0	1
Tb927.11.15030	small GTPase (X3)	Vesicular.transport	2.03	1.87	4.78	1.91	1.8979	1377	1	1	1	0.4854	2.49e-09	-0.5344	4.22e-10	1.7546	2.9e-05	3.3306	2.2e-17	0.855	0.00066	1.0728	4.2e-06	1.576	0	0	0	0	1	0	1	0	0	0	1	0	1	0	1
Tb927.11.13940	ubiquitin-conjugating enzyme e2, putative	Ubiquitin.proteasome	1.65	1.93	3.09	1.83	1.7049	2810	1	1	1	1.5649	1.9e-73	0.8424	1.39e-18	2.0564	2.7e-09	2.9652	3.4e-18	1.1094	7.2e-05	1.3366	4.1e-07	0.9088	1	0	1	0	1	0	1	0	1	0	1	0	1	0	1
Tb927.10.6210	TPR repeat, putative	ZUnknown	1.86	1.55	1.71	1.8	1.8046	848	1	1	1	0.5126	2.65e-14	-0.3844	0.000153	0.5228	0.017	0.6817	0.00035	-0.1061	1	-0.0929	0.85	0.1589	0	0	0	0	0	0	0	0	0	0	0	0	0	0	1
Tb927.2.3720	ubiquitin-conjugating enzyme, putative	Ubiquitin.proteasome	1.68	1.73	2.08	1.74	1.275	2685	1	1	1	0.7604	6.09e-16	0.0146	0.933	2.2865	1.3e-07	2.6714	3.2e-05	1.4972	0.01	1.616	0.0037	0.3849	1	0	1	0	1	0	1	0	1	0	1	0	0	0	1
Tb927.8.910	hypothetical protein, conserved, Qn domains, PRK14951 domain (DNA polymerase III subunits gamma and tau, E= -3), kinetoplastid specific	ZUnknown	2	1.51	1.84	1.58	1.0333	11413	1	1	1	-0.5335	6.3e-13	-1.5371	1.15e-10	2.3108	4.7e-07	1.4425	0.0055	1.7169	3.5e-05	0.562	0.42	-0.8683	0	0	0	1	1	0	1	0	1	0	0	0	0	1	1
Tb927.8.970	hypothetical protein	ZUnknown	1.58	2.03	2.75	1.54	1.0976	982	1	1	1	1.2394	2.19e-45	0.5826	5.04e-08	1.2398	0.00096	1.8238	1e-07	0.2168	0.86	0.3621	0.26	0.584	1	0	0	0	1	0	1	0	0	0	0	0	0	0	1
Tb927.11.2400	Flabarin-like	Cytoskeleton	1.67	2.91	5.38	1.53	1.8224	11186	1	1	1	0.5108	1.35e-12	-0.2332	0.00361	1.6052	0.0041	2.5724	3.6e-07	0.0624	1	0.1455	0.81	0.9672	0	0	0	0	1	0	1	0	0	0	0	0	1	0	1
Tb927.8.6340	CYC10, CYC2-like cyclin	Cell.cycle	1.61	4.09	6.35	1.5	2.2367	2948	1	1	1	0.547	2.49e-10	-0.14	0.695	2.6638	1e-09	3.5825	1.2e-08	0.633	0.68	0.915	0.23	0.9187	0	0	1	0	1	0	1	0	0	0	0	0	1	0	1
Tb927.9.9370	PSP1 C-terminal conserved region, putative	ZUnknown	1.68	5.59	19.11	1.49	2.5236	3859	1	1	1	0.9356	1.19e-23	0.1843	0.133	3.2891	2.3e-33	6.3101	1.3e-26	0.8074	0.081	2.0542	6.7e-10	3.021	1	0	1	0	1	0	1	0	0	0	1	0	1	0	1
Tb927.11.13420	PPPDE putative peptidase domain containing protein, putative	ZUnknown	2.02	1.7	1.78	1.45	0.7627	546	1	1	1	0.183	0.0581	-0.8283	1.61e-10	0.4437	0.095	0.6985	0.00081	-0.3192	0.27	-0.1294	0.73	0.2548	0	0	0	1	0	0	0	0	0	0	0	0	0	0	1
Tb927.8.7720	hypothetical protein, conserved	ZUnknown	1.6	1.88	4.48	1.39	0.9585	2764	1	1	1	0.2085	0.0288	-0.4665	7.06e-09	0.9921	0.47	2.351	0.00084	0.0785	1	0.1881	0.76	1.3589	0	0	0	0	0	0	1	0	0	0	0	0	1	0	1
Tb927.2.5800	sedoheptulose-1,7-bisphosphatase (SBPase)	Glucose.glycerol	1.82	1.81	1.79	1.36	1.1656	410	1	1	1	-0.1786	0.0344	-1.0448	1.77e-14	0.3722	0.14	0.5346	0.0069	-0.484	0.11	-0.3047	0.42	0.1624	0	0	0	1	0	0	0	0	0	0	0	0	0	0	1
Tb927.9.10950	chaperone DNAj, putative, J43	Chaperone	1.55	2.28	5.62	1.34	1.3951	2655	1	1	1	1.0116	7.27e-45	0.3808	0.000994	2.2025	4.7e-07	3.416	4.2e-14	1.0123	0.0022	0.925	0.0058	1.2135	1	0	0	0	1	0	1	0	1	0	0	0	1	0	1
Tb927.8.4300	hypothetical protein	ZUnknown	5.63	3.42	8.34	1.3	2.21	906	1	1	1	1.8732	5.96e-75	-0.6212	2.61e-05	3.0142	1.1e-11	4.3639	1.3e-21	1.24	0.0003	1.3046	0.00013	1.3497	1	0	0	1	1	0	1	0	1	0	1	0	1	0	1
Tb927.6.5090	hypothetical protein, conserved	ZUnknown	1.51	1.55	2.82	1.28	1.0772	665	1	1	1	0.6885	2.28e-19	0.0958	0.517	0.5833	0.1	1.5903	2.1e-10	-0.0532	1	0.0925	0.9	1.007	1	0	1	0	0	0	1	0	0	0	0	0	1	0	1
Tb927.10.3230	protein kinase, putative	Protein.kinase	2.07	2.23	2.55	1.27	1.0999	595	1	1	1	0.1742	0.0335	-0.8731	4.78e-12	0.8276	1.2e-07	1.1313	4.2e-14	-0.3281	0.18	-0.2178	0.45	0.3037	0	0	0	1	0	0	1	0	0	0	0	0	0	0	1
Tb927.5.1130	hypothetical protein, conserved	Mito.pathway	2.16	2.69	20.4	1.25	1.1827	2504	1	1	1	0.506	3.02e-08	-0.6025	2.68e-09	1.3373	1.4e-06	4.5477	6.4e-64	-0.0896	1	0.1971	0.85	3.2104	0	0	0	1	1	0	1	0	0	0	0	0	1	0	1
Tb927.4.4810	hypothetical protein, conserved	Vesicular.transport	2.46	1.94	2.92	1.2	0.585	763	1	1	1	1.0069	2.84e-21	-0.2896	0.066	1.088	0.0042	1.7515	2.3e-07	0.1304	1	0.2059	0.64	0.6635	1	0	1	0	1	0	1	0	0	0	0	0	1	0	1
Tb927.5.3440	hypothetical protein, conserved	ZUnknown	1.7	1.87	2.36	1.19	2.1538	525	1	1	1	1.9464	4.38e-92	1.1808	2.18e-20	1.7789	1e-13	2.7665	1.3e-30	0.8723	0.016	1.5265	3.3e-07	0.9876	1	0	1	0	1	0	1	0	0	0	1	0	1	0	1
Tb927.8.870	serine/threonine kinase, putative,protein kinase, putative	Protein.kinase	1.99	2.78	2.7	1.18	0.8046	5585	1	1	1	0.2777	0.000175	-0.716	0.00137	2.3763	6e-10	2.1283	5.5e-08	0.9024	0.18	0.6978	0.33	-0.248	0	0	0	1	1	0	1	0	0	0	0	0	0	0	1
Tb927.9.4310	tricarboxylate carrier, putative	Mito.membrane	1.8	2.59	3.67	1.14	1.5672	2788	1	1	1	1.3688	4.07e-75	0.5207	2.17e-06	2.3379	8.2e-73	3.398	5e-121	0.9664	4.8e-06	1.5236	7.7e-15	1.0601	1	0	0	0	1	0	1	0	0	0	1	0	1	0	1
Tb927.11.16820	hypothetical protein, conserved	ZUnknown	1.7	5.41	24.67	1.13	1.9184	4111	1	1	1	0.1282	0.198	-0.6365	6.9e-07	1.8518	1.9e-09	4.4095	3.4e-41	-0.5839	0.37	-0.2149	0.79	2.5577	0	0	0	1	1	0	1	0	0	0	0	0	1	0	1
Tb927.7.2980	Nitroreductase family, putative	ZUnknown	2.34	1.92	2.63	1.12	0.3859	653	1	1	1	1.7622	2.21e-126	0.5373	6.09e-07	-0.3229	0.98	0.5404	0.41	-1.267	0.00046	-0.8543	0.037	0.8633	1	0	0	0	0	0	0	0	0	1	0	0	1	0	1
Tb927.9.2560	TLC domain containing protein, putative	ZUnknown	2.04	1.5	1.76	1.11	0.4471	1619	1	1	1	0.2706	0.00166	-0.7568	6.13e-14	0.2697	1	0.6724	0.41	-0.3135	0.66	-0.1397	0.81	0.4027	0	0	0	1	0	0	0	0	0	0	0	0	0	0	1
Tb927.11.2500	carboxypeptidase, putative,metallo-peptidase, Clan MA(E) Family M32	Protease	2.26	1.86	2.32	1.08	0.7137	554	1	1	1	0.2009	0.00281	-0.9762	2.59e-14	-0.1955	1	0.4847	0.23	-1.0926	4.5e-05	-0.7321	0.015	0.6802	0	0	0	1	0	0	0	0	0	1	0	0	1	0	1
Tb927.7.480	hypothetical protein, conserved	ZUnknown	1.93	1.59	1.68	1.06	0.5818	1110	1	1	1	0.1985	0.00247	-0.7469	1.35e-11	0.793	0.037	1.0535	0.0014	0.1218	1	0.3069	0.5	0.2605	0	0	0	1	0	0	1	0	0	0	0	0	0	0	1
Tb927.8.4510	nucleoside diphosphate kinase, putative	ZUnknown	1.74	1.56	1.81	1.06	0.5785	805	1	1	1	0.3179	1.73e-05	-0.4782	3.18e-05	0.652	0.026	0.8938	0.00037	0.0149	1	0.0375	0.96	0.2418	0	0	0	0	0	0	0	0	0	0	0	0	0	0	1
Tb927.5.1660	protein phosphatase 2C, putative	Protein.phosphatase	3.13	2.14	2.88	1.01	0.9511	1176	1	1	1	0.041	0.742	-1.6064	4.4e-77	0.2882	1	1.285	0.00084	-0.8087	0.23	-0.2414	0.81	0.9968	0	0	0	1	0	0	1	0	0	0	0	0	1	0	1
Tb927.4.2500	eIF2K2 eukaryotic translation initiation factor 2-alpha kinase	Protein.kinase	2.18	2.32	6.21	0.98	1.273	1960	1	1	1	0.6291	7.57e-26	-0.4976	1.95e-07	1.8526	3.5e-06	3.444	2e-19	0.6406	0.04	0.8089	0.0031	1.5914	1	0	0	0	1	0	1	0	0	0	0	0	1	0	1
Tb927.10.13780	GSK3-short glycogen synthase kinase 3	Glycans	1.87	2.14	1.72	0.96	0.2469	2872	1	1	1	0.664	2.45e-22	-0.2407	0.00734	1.5745	5.3e-10	1.3814	1.7e-07	0.4741	0.43	0.6011	0.13	-0.1931	1	0	0	0	1	0	1	0	0	0	0	0	0	0	1
Tb927.8.4700	AAT5 Arginine transporter	Amino.acid.transport	4.2	1.54	3.08	0.96	1.8426	1730	1	1	1	0.9224	7.88e-17	-1.1489	1.24e-30	0.7945	0.083	1.3428	0.00016	0.1759	1	-0.2812	0.62	0.5483	1	0	0	1	0	0	1	0	0	0	0	0	0	0	1
Tb927.9.8370	hypothetical protein, conserved	ZUnknown	1.78	1.78	2.82	0.95	0.4186	774	1	1	1	0.4185	1.99e-06	-0.4148	1.96e-05	0.4248	0.45	1.06	0.00013	-0.4086	0.072	-0.4344	0.033	0.6352	0	0	0	0	0	0	1	0	0	0	0	0	1	0	1
Tb927.8.4940	hypothetical protein, conserved	ZUnknown	2.37	1.54	1.81	0.95	0.5914	35	1	1	1	0.1136	0.212	-1.1291	0.000203	-0.0481	1	-0.0903	0.92	-0.671	0.23	-0.9455	0.035	-0.0422	0	0	0	1	0	0	0	0	0	0	0	0	0	0	1
Tb927.6.820	PUF4	RNA.binding	2.02	2.42	3.82	0.93	1.4436	3033	1	1	1	0.5998	1.13e-18	-0.4154	0.000423	4.3159	2e-64	4.3135	2.2e-48	3.0392	3.2e-12	2.3809	1e-07	-0.0024	1	0	0	0	1	0	1	0	1	0	1	0	0	0	1
Tb927.10.14930	ZC3H39	RNA.binding	1.58	1.85	3.01	0.9	0.3334	3450	1	1	1	0.2759	0.00127	-0.3869	3.86e-05	1.9202	6e-09	2.6729	1.1e-06	1.033	0.015	1.0811	0.0076	0.7527	0	0	0	0	1	0	1	0	1	0	1	0	1	0	1
Tb927.11.10470	hypothetical protein, conserved	ZUnknown	2.06	1.87	4.56	0.89	1.0333	1595	1	1	1	0.7731	5.4e-28	-0.2715	0.0167	1.3	6e-06	2.2342	2.1e-16	0.3988	0.28	0.0442	0.94	0.9342	1	0	0	0	1	0	1	0	0	0	0	0	1	0	1
Tb927.10.14390	POB3 component of FACT complex	Chromatin	2.2	1.95	2.57	0.88	0.3674	602	1	1	1	0.4667	1.15e-13	-0.6685	2.17e-11	0.6674	0.0097	1.2697	2.1e-09	-0.294	0.38	-0.0948	0.82	0.6023	0	0	0	1	0	0	1	0	0	0	0	0	1	0	1
Tb927.11.4430	ferric reductase, putative,ferric reductase transmembrane component, putative	Enzyme	1.66	1.64	2.6	0.86	0.6538	1496	1	1	1	-0.5016	3.22e-11	-1.2321	1.54e-54	-0.4688	0.67	0.4866	0.45	-1.1803	9.8e-10	-0.8898	2.2e-05	0.9554	0	0	0	1	0	0	0	0	0	1	0	0	1	0	1
Tb927.11.16780	hypothetical protein	ZUnknown	2.14	2.22	6.71	0.84	1.4005	1976	1	1	1	0.3635	0.00134	-0.7368	0.00168	3.492	4.3e-23	4.9881	3.8e-23	2.3433	2.5e-10	2.2412	4.7e-09	1.4961	0	0	0	1	1	0	1	0	1	0	1	0	1	0	1
Tb927.10.11590	nicotinate phosphoribosyltransferase, putative	Enzyme	1.64	2.1	1.97	0.82	0.1848	214	1	1	1	-0.2814	0.000616	-0.9929	1.4e-13	0.3332	0.38	0.5953	0.01	-0.7403	0.023	-0.383	0.41	0.2621	0	0	0	1	0	0	0	0	0	0	0	0	0	0	1
Tb927.11.13120	PUB domain containing protein, putative	ZUnknown	1.54	1.79	2.23	0.72	-0.0639	0	1	1	1	0.2022	0.0482	-0.4177	0.503	-0.0527	1	0.1713	0.72	-0.8908	0.67	-0.9871	0.49	0.224	0	0	1	0	0	0	0	0	0	0	0	0	0	0	1
Tb927.11.5450	malic enzyme	Mito.pathway	1.94	2.26	3.88	0.68	-0.304	1094	1	1	1	0.624	2.49e-23	-0.3326	1.88e-05	1.0335	6.9e-06	2.8018	6.1e-39	-0.144	1	0.8458	0.0062	1.7683	1	0	0	0	1	0	1	0	0	0	0	0	1	0	1
Tb927.4.1390	hypothetical protein, conserved	ZUnknown	1.57	1.66	2.12	0.67	0.5327	1030	1	1	1	1.1299	6.57e-75	0.4774	8.67e-06	1.183	0.00075	1.6752	1.7e-07	0.4489	0.047	0.5878	0.0024	0.4922	1	0	0	0	1	0	1	0	0	0	0	0	0	0	1
Tb927.11.1150	radial spoke protein RSP3, putative	Cytoskeleton	1.62	1.51	1.8	0.66	0.1419	1426	1	1	1	0.2799	7.9e-05	-0.418	1.08e-06	0.8405	0.014	1.76	1.6e-10	0.2481	0.87	0.9158	0.00024	0.9195	0	0	0	0	0	0	1	0	0	0	0	0	1	0	1
Tb927.8.5240	Domain of unknown function DUF221, putative	ZUnknown	1.88	1.51	2.02	0.66	0.0191	813	1	1	1	-0.0867	0.238	-0.9944	7.5e-27	0.1334	1	0.6935	0.015	-0.4649	0.21	-0.3185	0.44	0.5601	0	0	0	1	0	0	0	0	0	0	0	0	0	0	1
Tb927.10.14780	protein kinase, putative,mitogen-activated protein kinase kinase kinase, putative	Protein.kinase	1.77	1.72	1.94	0.65	-0.212	1380	1	1	1	0.178	0.00923	-0.6481	9.46e-21	0.7885	0.0068	1.0241	9.8e-05	0.0055	1	0.069	0.88	0.2356	0	0	0	1	0	0	1	0	0	0	0	0	0	0	1
Tb927.11.11150	U5 snRNP-specific 40 kDa protein U5-40K	RNA.processing	1.8	2.93	1	0.63	-0.2746	0	1	1	1	-0.371	0.000268	-1.2197	0.334	-0.2177	1	-0.4476	0.330272	-1.7684	0.867427	-0.4985	0.870127	-0.2299	0	0	1	0	0	0	0	0	0	0	0	0	0	0	1
Tb927.11.6120	ABC transporter, putative	Transporter	1.6	2.09	2.66	0.52	1.0612	1758	1	1	1	-0.3911	2.72e-10	-1.0697	5.04e-17	1.7691	8.8e-09	2.255	1.1e-11	0.7081	0.25	0.843	0.11	0.4859	0	0	0	1	1	0	1	0	0	0	0	0	0	0	1
Tb927.10.15620	hypothetical protein	ZUnknown	1.58	3.71	7.82	0.5	1.2306	1304	1	1	1	0.8004	2.99e-08	0.1396	0.343	3.1176	2.4e-18	3.6139	1.2e-18	1.2278	0.0017	0.6475	0.23	0.4963	1	0	1	0	1	0	1	0	1	0	0	0	0	0	1
Tb927.10.5390	hypothetical protein, conserved	ZUnknown	1.9	1.6	1.58	0.39	-0.3646	391	1	1	1	0.4067	9.25e-10	-0.5209	4.36e-05	0.0234	1	0.1489	0.75	-0.6531	0.32	-0.5098	0.43	0.1255	0	0	0	0	0	0	0	0	0	0	0	0	0	0	1
Tb927.10.1500	methionyl-tRNA synthetase, putative (MetRS)	Translation.tRNA	2.05	2.09	2.45	0.33	-0.8625	690	1	1	1	0.2291	0.000219	-0.8031	1.46e-25	0.0306	1	0.4725	0.18	-1.0355	0.00048	-0.8176	0.0091	0.4419	0	0	0	1	0	0	0	0	0	1	0	0	0	0	1
Tb927.3.5310	paraflagellar rod protein,I2 antigen	Cytoskeleton	3.2	1.84	1.99	0.22	-1.0689	403	1	1	1	-0.1658	0.00827	-1.8417	6.58e-39	-0.2688	1	0.4553	0.55	-1.1522	0.11	-0.5383	0.61	0.7241	0	0	0	1	0	0	0	0	0	0	0	0	1	0	1
Tb927.2.4700	SDH8 succinate dehydrogenase (complex II) subunit	Mito.e.transport	1.73	1.61	1.19	1.46	1.1484	1866	1	1	0	0.5413	1.17e-07	-0.2527	0.0398	1.1775	0.023	1.1399	0.024	0.4888	0.74	0.8837	0.092	-0.0376	0	0	0	0	1	0	1	0	0	0	0	0	0	0	1
Tb927.4.4940	hypothetical protein, conserved, poly(Q), no clear yeast or human matches	ZUnknown	1.6	1.58	1.36	1.16	1.2347	1948 (3000)	1	1	0	1.6967	2.33e-69	1.0226	4.23e-15	1.511	1e-08	2.0588	5.2e-13	0.8519	0.083	1.6124	1.1e-05	0.5478	1	0	1	0	1	0	1	0	0	0	1	0	0	0	1
Tb927.4.3170	hypothetical protein, conserved	ZUnknown	1.58	1.51	1.08	1.11	1.3932	669	1	1	0	0.6864	7.01e-24	0.026	0.865	1.1679	8.5e-07	1.3749	3.8e-08	0.5729	0.13	1.2644	1e-05	0.207	1	0	1	0	1	0	1	0	0	0	1	0	0	0	1
Tb927.11.8310	class I transcription factor A, subunit 4 (CITFA-4)	RNA.synthesis	1.57	1.53	1.27	0.87	0.4854	1419	1	1	0	0.2608	0.000232	-0.3903	2.21e-05	0.9487	0.094	1.2206	0.0091	0.3308	0.96	0.8731	0.06	0.2719	0	0	0	0	0	0	1	0	0	0	0	0	0	0	1
Tb927.10.12350	hypothetical protein, conserved	ZUnknown	1.68	1.66	1.49	0.77	-0.0291	166	1	1	0	0.0467	0.711	-0.6999	0.00806	-0.023	1	-0.0701	0.88	-0.7533	0.39	-0.6436	0.39	-0.0471	0	0	0	1	0	0	0	0	0	0	0	0	0	0	1
Tb927.3.4630	UDP-glucose:glycoprotein glucosyltransferase, ER quality control	Glycans	1.62	1.58	1.2	0.18	-0.9069	250	1	1	0	-0.1174	0.0683	-0.814	1.73e-10	0.5184	0.18	0.8084	0.0056	-0.1409	1	0.5483	0.23	0.29	0	0	0	1	0	0	0	0	0	0	0	0	0	0	1
Tb927.11.16830	IFT22 (was RABL5) (in UPF1-TAP)	Cytoskeleton	1.65	1.05	1.64	1.9	1.8888	2083	1	0	1	0.428	1.34e-09	-0.2935	0.00026	0.787	0.0038	1.3107	2.3e-08	0.7212	0.0013	0.5955	0.011	0.5237	0	0	0	0	0	0	1	0	0	0	0	0	0	0	1
Tb927.1.3450	hypothetical protein, conserved	ZUnknown	2.48	1.34	2.26	1.68	1.1932	1311	1	0	1	-0.6691	5.15e-19	-1.9777	1.78e-60	-0.6661	0.44	0.1081	0.93	-1.085	0.0016	-1.0691	0.002	0.7742	0	1	0	1	0	0	0	0	0	1	0	1	1	0	1
Tb927.8.5930	hypothetical protein	ZUnknown	3.96	1.41	3.13	1.67	2.1419	2600	1	0	1	2.0276	2.66e-08	0.0429	0.771	1.5978	0.069	2.2861	0.012	1.1052	1.3e-06	0.6392	0.02	0.6883	1	0	1	0	0	0	1	0	1	0	0	0	1	0	1
Tb927.6.220	purine nucleoside transporter NT9	Nucleotides	1.54	1.25	4.87	1.57	2.171	1073	1	0	1	1.2314	3.41e-28	0.6095	0.000468	1.1159	0.017	2.7932	4.6e-09	0.7895	0.56	0.5085	0.68	1.6773	1	0	1	0	1	0	1	0	0	0	0	0	1	0	1
Tb927.8.3550	MAPK3 protein kinase	Protein.kinase	1.68	1.42	1.74	1.34	0.9709	1992	1	0	1	0.1232	0.0913	-0.6231	3.76e-09	1.6082	2.8e-06	2.2188	1.2e-10	1.1001	0.012	1.4174	0.00057	0.6106	0	0	0	1	1	0	1	0	1	0	1	0	1	0	1
Tb927.6.1510	lysyl-tRNA synthetase, putative	Translation.tRNA	1.91	1.43	2.54	1.3	0.9184	627	1	0	1	0.0778	0.435	-0.8588	8.4e-10	0.1441	1	1.1494	2.6e-06	-0.3683	0.61	-0.1937	0.74	1.0053	0	0	0	1	0	0	1	0	0	0	0	0	1	0	1
Tb927.11.6700	hypothetical protein, conserved	ZUnknown	1.58	1.45	1.97	0.76	0.0048	1314	1	0	1	0.8891	1.18e-17	0.2278	0.0137	0.5481	0.14	0.9905	0.00015	0.0095	1	0.0145	0.99	0.4424	1	0	0	0	0	0	0	0	0	0	0	0	0	0	1
Tb927.9.2240	protein kinase, putative	Protein.kinase	1.61	1.4	1.99	0.62	0.415	1998	1	0	1	0.2695	0.000187	-0.4162	7.85e-07	0.7439	0.0037	1.1988	1.4e-07	0.2539	0.56	0.2081	0.53	0.4549	0	0	0	0	0	0	1	0	0	0	0	0	0	0	1
Tb927.4.3160	Dihydroxyacetonephosphate acyltransferase	Lipids	1.55	1.28	1.82	0.4	-0.0893	1057	1	0	1	-0.9474	4.41e-46	-1.5835	4.31e-50	0.1657	1	0.8777	0.2	-0.1919	1	0.0165	0.99	0.712	0	1	0	1	0	0	0	0	0	0	0	0	1	0	1
Tb927.9.11820	CRAL/TRIO domain containing protein, putative	ZUnknown	1.77	1.31	1.36	2.63	2.3267	662	1	0	0	1.0237	1.24e-20	0.1971	0.274	-0.1073	1	0.0843	0.92	-0.4938	0.017	-0.3543	0.14	0.1916	1	0	1	0	0	0	0	0	0	0	0	0	0	0	1
Tb927.10.2420	hypothetical protein	ZUnknown	1.51	0.97	1.18	2.5	1.9386	1441	1	0	0	0.8015	7.45e-06	0.211	0.0512	-0.0624	1	0.2585	0.71	-0.0212	1	0.0245	0.97	0.3209	1	0	1	0	0	0	0	0	0	0	0	0	0	0	1
Tb927.9.13200	hypothetical protein	ZUnknown	2.27	1.09	1.12	2.24	2.8473	351	1	0	0	0.6779	1.13e-06	-0.5061	0.0011	-0.8834	0.058	-0.4267	0.52	-1.0124	0.00034	-0.5879	0.091	0.4567	1	0	0	0	0	0	0	0	0	1	0	0	0	0	1
Tb927.6.1780	MAPK4 protein kinase	Protein.kinase	1.52	1.37	1.37	2.12	1.8128	628	1	0	0	-0.2535	0.00436	-0.8619	2.34e-11	-0.0554	1	0.4356	0.56	-0.5077	0.3	-0.0212	0.99	0.491	0	0	0	1	0	0	0	0	0	0	0	0	0	0	1
Tb927.11.5670	MND1 homologue, putative involvement in meiosis	DNA	1.52	0.94	0.69	1.89	1.157	842	1	0	0	1.6573	8.58e-59	1.0512	1.38e-14	-0.0999	1	-0.5568	0.43	-0.0144	1	-0.0193	0.99	-0.4569	1	0	1	0	0	0	0	0	0	0	0	0	0	0	1
Tb927.2.5080	hypothetical protein, conserved	ZUnknown	2.15	0.99	0.93	1.87	1.2928	0	1	0	0	0.3952	3.73e-05	-0.7117	0.317	0.0187	1	-0.1157	0.81	0.0351	1	-0.0073	1	-0.1344	0	0	1	0	0	0	0	0	0	0	0	0	0	0	1
Tb927.9.10560	POMP6/TbLOK1	Mito.membrane	1.6	1.13	1.13	1.85	2.0727	1126	1	0	0	0.177	0.0527	-0.5014	1.54e-07	-0.2068	0.89	-0.0653	0.91	-0.3875	0.37	-0.2479	0.58	0.1415	0	0	0	0	0	0	0	0	0	0	0	0	0	0	1
Tb927.3.4930	hypothetical protein, conserved	ZUnknown	1.73	1.22	1.21	1.82	2.1869	63	1	0	0	-0.1507	0.298	-0.9415	2.99e-05	-0.0995	1	-0.156	0.71	-0.3845	0.53	-0.4257	0.25	-0.0565	0	0	0	1	0	0	0	0	0	0	0	0	0	0	1
Tb927.11.8450	Amastin surface glycoprotein, putative	Membrane.protein	1.68	1.47	1.46	1.48	0.8797	1247	1	0	0	0.4282	8.87e-06	-0.3217	0.0165	0.2573	0.71	0.5543	0.038	-0.2971	0.58	0.0074	1	0.297	0	0	0	0	0	0	0	0	0	0	0	0	0	0	1
Tb927.10.8890	kinetoplast DNA-associated protein, putative	Mito.DNA	1.67	1.29	1.17	1.47	0.7513	2283	1	0	0	0.6083	2.46e-13	-0.1334	0.235	0.5969	0.49	1.0107	0.034	0.2329	1	0.7816	0.11	0.4138	1	0	1	0	0	0	1	0	0	0	0	0	0	0	1
Tb927.7.7100	hypothetical protein	ZUnknown	1.65	1.21	0.7	1.2	1.0333	2958	1	0	0	0.0611	0.51	-0.6616	2.4e-07	0.6564	0.75	0.2677	0.86	0.3849	0.96	0.7742	0.24	-0.3887	0	0	0	1	0	0	0	0	0	0	0	0	0	0	1
Tb927.5.1700	Kinesin-2, also "replication Factor A 28 kDa subunit, or RPA1-2	DNA	1.53	1.19	1.29	1.06	0.482	2225	1	0	0	0.3709	2.28e-06	-0.2456	0.0251	0.1661	1	0.5419	0.34	-0.0838	1	0.1781	0.8	0.3758	0	0	0	0	0	0	0	0	0	0	0	0	0	0	1
Tb927.6.1920	hypothetical protein, conserved	ZUnknown	1.62	1.17	1.43	1	0.3103	2076	1	0	0	0.2303	0.00335	-0.465	9.32e-09	0.311	0.94	0.5087	0.44	0.089	1	-0.0123	0.99	0.1977	0	0	0	0	0	0	0	0	0	0	0	0	0	0	1
Tb927.8.3740	pterin 4 alpha carbinolamine dehydratase, putative	Enzyme	1.51	1.33	1.25	1	0.279	466	1	0	0	0.0316	0.796	-0.5646	0.000628	0.3627	0.63	0.4587	0.26	-0.0488	1	0.1348	0.87	0.096	0	0	0	0	0	0	0	0	0	0	0	0	0	0	1
Tb927.10.16010	hypothetical protein	ZUnknown	1.71	1.39	0.59	1	0.9436	1036	1	0	0	0.3289	0.484	-0.4424	0.0185	0.2867	1	-1.2229	0.3	-0.1838	1	-0.4687	0.63	-1.5096	0	0	0	0	0	0	0	0	0	0	0	0	0	1	1
Tb927.7.1530	2OG-Fe(II) oxygenase superfamily, putative	ZUnknown	1.91	1.45	1.49	0.97	0.267	215	1	0	0	0.1824	0.0525	-0.7531	0.000437	0.0151	1	-0.0025	1	-0.522	0.5	-0.577	0.26	-0.0176	0	0	0	1	0	0	0	0	0	0	0	0	0	0	1
Tb927.9.13990	DRBD2	RNA.binding	1.54	1.02	1.02	0.96	0.2224	3456	1	0	0	-0.2891	7.1e-05	-0.912	3.11e-23	0.2093	1	0.338	0.63	0.174	1	0.3138	0.65	0.1287	0	0	0	1	0	0	0	0	0	0	0	0	0	0	1
Tb927.1.2160	calpain-like protein fragment, putative	Protease	2.11	0.95	1.17	0.9	0.7283	1183	1	0	0	0.4981	0.000211	-0.5815	0.112	-0.4316	1	-0.2871	0.83	-0.3569	1	-0.5077	0.6	0.1445	0	0	1	0	0	0	0	0	0	0	0	0	0	0	1
Tb927.7.7090	hypothetical protein, conserved, no clear yeast or human matches	ZUnknown	2.24	1.15	1.24	0.87	0.6009	546	1	0	0	0.9255	9.58e-25	-0.2379	0.11	0.2788	1	0.7185	0.21	0.0766	1	0.4032	0.47	0.4397	1	0	1	0	0	0	0	0	0	0	0	0	0	0	1
Tb927.9.6620	hypothetical protein, conserved	Mito.pathway	2.07	1.17	1.29	0.82	0.3142	552	1	0	0	0.8474	2.06e-12	-0.2032	0.268	-0.2439	0.97	-0.282	0.61	-0.4682	0.0063	-0.6509	2.1e-05	-0.0381	1	0	1	0	0	0	0	0	0	0	0	0	0	0	1
Tb927.10.10210	procyclin-associated gene 4 (PAG4) protein (PAG4)	PAG	2.23	0.73	0.92	0.8	0.6167	1119	1	0	0	1.3888	5.65e-15	0.2288	0.107	0.7686	0.21	0.7031	0.22	1.2203	0.036	0.8217	0.23	-0.0655	1	0	1	0	0	0	0	0	1	0	0	0	0	0	1
Tb927.8.630	lipoate-protein ligase, lipoyltransferase, lipoate biosynthesis protein, putative	Mito.pathway	1.67	0.91	0.78	0.73	0.1974	0	1	0	0	-0.1774	0.168	-0.9196	0.139	-0.4949	0.087	-0.5941	0.015	-0.3524	0.95	-0.2327	0.77	-0.0992	0	0	1	0	0	0	0	0	0	0	0	0	0	0	1
Tb927.3.4900	tRNA isopentenyltransferase, putative	rRNA.tRNA.process	1.51	0.9	1.13	0.68	0.1155	0	1	0	0	-0.0193	0.878	-0.6138	0.342	-0.1135	1	-0.1408	0.63	0.0461	1	-0.315	0.73	-0.0273	0	0	1	0	0	0	0	0	0	0	0	0	0	0	1
Tb927.1.4100	cytochrome oxidase subunit IV (COXIV)	Mito.e.transport	1.6	1.38	1.17	0.65	-0.1467	1757	1	0	0	1.2012	2.78e-69	0.5201	1.25e-06	0.5836	0.14	0.8939	0.0026	0.1186	1	0.6647	0.045	0.3103	1	0	0	0	0	0	0	0	0	0	0	0	0	0	1
Tb927.3.1070	RF1 Mitochondrial peptide chain release factor 1	Mito.translation	1.77	1.34	1.27	0.65	0.1462	3	1	0	0	0.3506	7.47e-06	-0.4694	0.167	-0.0381	1	-0.0072	0.99	-0.4581	0.94	-0.3564	0.75	0.0309	0	0	1	0	0	0	0	0	0	0	0	0	0	0	1
Tb927.6.3730	chaperone DNAj, putative, J38	Chaperone	1.66	0.9	0.96	0.61	-0.1681	50	1	0	0	-0.352	0.00139	-1.0863	0.0259	-0.4146	0.19	-0.5225	0.033	-0.2678	1	-0.4587	0.48	-0.1079	0	0	0	1	0	0	0	0	0	0	0	0	0	0	1
Tb927.4.4640	hypothetical protein, conserved	ZUnknown	2.33	0.88	1.01	0.55	-0.1467	0	1	0	0	0.4419	0.00618	-0.7766	0.398	-0.0296	1	-0.1569	0.77	0.1629	1	-0.1697	0.86	-0.1273	0	0	1	0	0	0	0	0	0	0	0	0	0	0	1
Tb927.10.12340	hypothetical protein, conserved	ZUnknown	1.7	1.23	0.89	0.55	0.4294	126	1	0	0	-0.0518	0.725	-0.8136	0.0382	-0.1387	1	-0.5305	0.47	-0.4361	1	-0.3658	0.79	-0.3918	0	0	0	1	0	0	0	0	0	0	0	0	0	0	1
Tb927.11.16200	microtubule-associated protein,corset-associated protein 17 (CAP17)	Cytoskeleton	1.55	1	1	0.51	-0.039	757	1	0	0	0.7754	6.64e-13	0.1463	0.401	0.4575	0.99	0.7854	0.41	0.4548	0.89	0.7801	0.25	0.3279	1	0	1	0	0	0	0	0	0	0	0	0	0	0	1
Tb927.4.4710	hypothetical protein, conserved	ZUnknown	1.58	1.11	0.96	0.48	-0.334	50	1	0	0	-0.1823	0.0336	-0.8413	0.0647	-0.0349	1	-0.2489	0.45	-0.1897	1	-0.1956	0.88	-0.214	0	0	1	0	0	0	0	0	0	0	0	0	0	0	1
Tb927.11.12330	hypothetical protein, conserved	ZUnknown	1.99	0.93	0.75	0.46	-0.454	0	1	0	0	0.4087	0.0122	-0.5807	0.349	0.1396	1	0.2239	0.59	0.247	1	0.6344	0.39	0.0843	0	0	1	0	0	0	0	0	0	0	0	0	0	0	1
Tb927.11.16480	enoyl-CoA hydratase/isomerase family protein, putative	Lipids	1.65	0.83	0.8	0.44	-0.5146	1401	1	0	0	1.3464	5.19e-56	0.6281	4.94e-12	-0.2406	0.9	-0.2709	0.56	0.0217	1	0.0479	0.95	-0.0303	1	0	1	0	0	0	0	0	0	0	0	0	0	0	1
Tb927.2.1730	hypothetical protein, conserved	ZUnknown	1.71	1.17	1.14	0.42	-0.3646	0	1	0	0	0.0656	0.661	-0.7089	0.437	-0.0965	1	-0.1022	0.91	-0.3259	1	-0.2897	0.79	-0.0057	0	0	1	0	0	0	0	0	0	0	0	0	0	0	1
Tb927.10.13200	PPR4	Mito.translation	1.92	0.82	0.99	0.39	-0.4279	23	1	0	0	0.1803	0.0264	-0.7574	0.102	0.058	1	-0.213	0.62	0.3386	1	-0.1991	0.85	-0.271	0	0	1	0	0	0	0	0	0	0	0	0	0	0	1
Tb927.8.3380	SDH2N succinate dehydrogenase (complex II) subunit, electron transfer protein	Mito.e.transport	1.67	1.34	1.32	0.34	0.1021	1063	1	0	0	0.0893	0.376	-0.6537	3.55e-11	0.3201	0.89	0.6482	0.13	-0.1075	1	0.2488	0.72	0.3281	0	0	0	1	0	0	0	0	0	0	0	0	0	0	1
Tb927.5.310	invariant surface glycoprotein, putative	ZUnknown	1.51	1.25	1.16	0.25	-0.6974	2256	1	0	0	0.2343	0.00252	-0.3648	1.06e-05	0.7893	0.17	1.2327	0.067	0.4645	0.56	1.0213	0.0057	0.4434	0	0	0	0	0	0	1	0	0	0	1	0	0	0	1
Tb927.10.14030	hypothetical protein, conserved, in Golgi and ER	ZUnknown	1.69	1.35	1.45	0.24	-1.2401	50	1	0	0	0.139	0.0581	-0.6204	0.00487	0.162	1	0.3056	0.71	-0.2684	1	-0.2261	0.84	0.1436	0	0	0	1	0	0	0	0	0	0	0	0	0	0	1
Tb927.9.16070	hypothetical protein	ZUnknown	2.04	-0.0855	-1.123	0	0.415	0	1	0	0	-2.1828	0.0854	-3.2149	0.121	0.6938	1	-1.123	0.93611	0.7793	NA	0	NA	-1.8168	0	0	1	0	0	0	0	0	0	0	0	0	0	1	1
Tb927.1.3550	hypothetical protein	ZUnknown	1.04	3.27	2.25	2.1	3.1587	5637	0	1	1	0.8451	1.14e-25	0.7942	2.01e-21	2.7925	7.3e-20	3.4157	1.1e-20	1.0822	0.00033	2.2438	2.9e-17	0.6232	1	0	1	0	1	0	1	0	1	0	1	0	1	0	1
Tb927.8.7790	zinc finger domain, LSD1 subclass, putative	Zinc.finger	1.02	2.24	6.77	2.06	1.8758	1918	0	1	1	-1.027	4.71e-29	-1.0593	1.34e-24	1.707	5.8e-05	3.7864	4.9e-23	0.5432	0.21	1.0279	0.00041	2.0794	0	1	0	1	1	0	1	0	0	0	1	0	1	0	1
Tb927.8.6650	DRBD13	RNA.binding	1.39	3.28	2.78	2.06	2.663	4640	0	1	1	1.1211	2.19e-44	0.6432	8.71e-07	2.8505	6.8e-19	2.0302	5.8e-06	1.1385	0.11	0.5532	0.57	-0.8203	1	0	1	0	1	0	1	0	0	0	0	0	0	1	1
Tb927.10.8050	TFIIF-stimulated CTD phosphatase, putative	Protein.phosphatase	1.41	1.99	2.33	1.97	2.373	1894	0	1	1	1.3365	2.09e-51	0.8388	8.94e-14	2.2038	5.3e-23	4.4009	1.7e-41	1.213	0.0004	3.1814	3.4e-23	2.1971	1	0	1	0	1	0	1	0	1	0	1	0	1	0	1
Tb927.11.8470	ZC3H45	RNA.binding	1.24	2.09	2.28	1.91	2.3401	5035	0	1	1	0.7638	1.03e-12	0.4573	0.000103	3.6449	2e-15	3.3695	1.6e-11	2.5835	2.2e-11	2.1804	6e-08	-0.2754	1	0	0	0	1	0	1	0	1	0	1	0	0	0	1
Tb927.10.12780	ZC3H37	RNA.binding	1.1	4.15	19.06	1.83	2.4042	2506	0	1	1	1.1443	3.14e-34	1.004	4.76e-05	2.5541	1.5e-08	4.719	1.8e-21	0.5002	0.57	0.4668	0.45	2.1649	1	0	1	0	1	0	1	0	0	0	0	0	1	0	1
Tb927.10.5190	Kinesin associated protein, putative	ZUnknown	1.29	1.7	17.55	1.8	1.4383	2638	0	1	1	0.3803	0.000943	0.0155	0.927	0.7512	0.58	4.1322	5.3e-13	-0.0116	1	-0.0011	1	3.381	0	0	1	0	0	0	1	0	0	0	0	0	1	0	1
Tb927.9.12170	leucine-rich repeat protein (LRRP)	LRRP	1.28	2.75	5.84	1.78	1.7108	4471	0	1	1	0.3559	1.22e-06	-0.0004	0.998	2.5816	8.8e-15	3.1823	8.1e-13	1.1228	0.0015	0.6367	0.16	0.6007	0	0	1	0	1	0	1	0	1	0	0	0	1	0	1
Tb927.3.5080	PSP1 C-terminal conserved region, putative	ZUnknown	1.42	1.63	2.13	1.68	1.4258	3004	0	1	1	0.3848	8.09e-07	-0.1177	0.742	1.1169	0.14	1.5687	0.0097	0.4141	0.96	0.478	0.61	0.4518	0	0	1	0	0	0	1	0	0	0	0	0	0	0	1
Tb927.3.3960	DRBD6A	RNA.binding	1.3	1.54	2.69	1.67	2.3646	2073	0	1	1	1.1246	8.76e-40	0.7424	0.022	2.3917	1.7e-11	3.8589	2e-28	1.7732	0.0002	2.431	5.8e-08	1.4672	1	0	1	0	1	0	1	0	1	0	1	0	1	0	1
Tb927.1.4490	Histone acetyltransferase HAT6	Lipids	1.45	2.31	7.98	1.65	2.5269	2457	0	1	1	-0.2769	0.0021	-0.8082	0.000167	1.5856	0.2	4.8814	3.6e-10	0.3803	0.96	1.8849	9.4e-06	3.2958	0	0	0	1	0	0	1	0	0	0	1	0	1	0	1
Tb927.11.8430	hypothetical protein, conserved	ZUnknown	1.42	2.01	3.9	1.59	1.265	1674	0	1	1	0.9524	4.15e-36	0.4445	4.69e-07	1.9161	7.5e-15	3.0843	4.5e-37	0.9124	1.7e-06	1.1192	6.9e-10	1.1682	1	0	0	0	1	0	1	0	0	0	1	0	1	0	1
Tb927.11.530	RBP3	RNA.binding	0.97	2.19	2.28	1.58	2.5517	2772	0	1	1	-0.35	4.09e-06	-0.3066	0.00331	3.3287	7.5e-16	2.9564	4.3e-09	2.1961	3.5e-08	1.7667	2.4e-05	-0.3723	0	0	0	0	1	0	1	0	1	0	1	0	0	0	1
Tb927.4.4230	RBP31	RNA.binding	1.36	3.25	3.34	1.53	1.9486	3526	0	1	1	0.3947	8.75e-07	-0.0438	0.736	2.741	5.1e-13	2.8478	9.5e-09	1.0412	0.0041	1.1088	0.0014	0.1068	0	0	1	0	1	0	1	0	1	0	1	0	0	0	1
Tb927.7.4690	hypothetical protein	ZUnknown	1.05	2.07	1.67	1.46	1.3006	1718	0	1	1	0.3174	0.0132	0.2422	0.0123	0.7474	0.03	0.6667	0.072	-0.3034	0.96	-0.0762	0.94	-0.0807	0	0	0	0	0	0	1	0	0	0	0	0	0	0	1
Tb04.3I12.100	hypothetical protein	ZUnknown	1.36	1.71	8.35	1.44	1.4647	137	0	1	1	-0.2291	0.148	-0.6745	0.000184	1.3454	3e-06	3.2096	1.1e-29	0.5692	0.67	0.1486	0.92	1.8642	0	0	0	1	1	0	1	0	0	0	0	0	1	0	1
Tb927.8.7820	hypothetical protein, conserved, Cold-shock DNA-binding domain.	ZUnknown	0.84	1.92	7.25	1.36	1.9733	3134	0	1	1	-0.6222	8.6e-10	-0.3687	0.00145	3.3856	7.5e-15	5.3019	2.2e-19	2.4476	4.2e-06	2.4446	3.9e-06	1.9163	0	1	0	0	1	0	1	0	1	0	1	0	1	0	1
Tb927.1.1470	conserved protein, unknown function	ZUnknown	1.35	1.52	2.3	1.35	2.5152	1633	0	1	1	0.4995	3.08e-06	0.07	0.774	1.822	0.0009	1.6828	0.0051	1.2136	0.19	0.4797	0.71	-0.1392	0	0	1	0	1	0	1	0	0	0	0	0	0	0	1
Tb927.3.5250	ZC3H8	RNA.binding	1.26	1.62	2.23	1.34	1.4957	2332	0	1	1	-0.1129	0.195	-0.4489	1.31e-05	3.7128	1.3e-30	4.2287	2.3e-22	3.0203	3.5e-11	3.0734	1e-10	0.5159	0	0	0	0	1	0	1	0	1	0	1	0	0	0	1
Tb927.4.3970	hypothetical protein, conserved, kinetoplastid-specific	ZUnknown	1.16	2.4	3.96	1.28	1.8373	3854	0	1	1	-0.1174	0.218	-0.3268	0.00615	1.9678	0.00012	2.4174	0.0035	0.7063	0.13	0.4303	0.48	0.4496	0	0	0	0	1	0	1	0	0	0	0	0	0	0	1
Tb927.11.2730	UDP-galactose 4-epimerase GALE	Glycans	1.27	1.63	2.14	1.17	1.3391	1285	0	1	1	-0.1087	0.19	-0.4519	2.92e-07	0.7805	0.023	1.6532	1.1e-09	0.0791	1	0.5574	0.0013	0.8727	0	0	0	0	0	0	1	0	0	0	0	0	1	0	1
Tb927.3.1630	CK1 casein kinase 1	Protein.kinase	0.95	2.26	4.4	1.15	2.038	3325	0	1	1	0.007	0.954	0.0807	0.778	2.8022	3.1e-17	3.3929	1.3e-12	1.6259	0.00053	1.2545	0.012	0.5907	0	0	1	0	1	0	1	0	1	0	1	0	1	0	1
Tb927.1.2600	PUF9	RNA.binding	1.24	1.77	2.02	1.14	1.2037	2274	0	1	1	-1.3879	2.96e-92	-1.6927	1.03e-49	0.894	0.034	2.0649	1.4e-07	0.0705	1	1.0535	0.033	1.1709	0	1	0	1	0	0	1	0	0	0	1	0	1	0	1
Tb927.4.2460	kinatase, putative	Enzyme	1.46	1.72	2.56	1.01	1.6871	2585	0	1	1	0.1955	0.0143	-0.3464	0.00563	0.703	0.12	0.6974	0.2	-0.0826	1	-0.6615	0.14	-0.0056	0	0	0	0	0	0	0	0	0	0	0	0	0	0	1
Tb927.6.2530	hypothetical protein	ZUnknown	1.37	1.52	4.1	0.98	1.9158	2178	0	1	1	-0.121	0.493	-0.5777	1.45e-05	1.3617	0.023	2.4313	0.00044	0.7548	0.19	0.394	0.59	1.0696	0	0	0	0	1	0	1	0	0	0	0	0	1	0	1
Tb927.10.4050	serine palmitoyltransferase, putative	Lipids	1.21	1.89	11.03	0.97	0.6354	2270	0	1	1	0.1322	0.102	-0.1418	0.248	1.7148	1.1e-10	4.5598	5.1e-21	0.7973	0.43	1.096	0.089	2.845	0	0	1	0	1	0	1	0	0	0	0	0	1	0	1
Tb927.10.12280	hypothetical protein	ZUnknown	1.16	1.55	2.48	0.9	1.2306	158	0	1	1	-0.0293	0.924	-0.2489	0.385	1.3897	0.031	1.4923	0.0071	0.759	0.64	0.1839	0.9	0.1026	0	0	1	0	1	0	1	0	0	0	0	0	0	0	1
Tb927.9.9520	ZC3H29	RNA.binding	1.07	2.93	31.8	0.87	0.7684	3438	0	1	1	0.0992	0.248	0.0072	0.962	2.157	2.5e-09	6.1816	6.4e-29	0.6058	0.64	1.1908	0.026	4.0246	0	0	1	0	1	0	1	0	0	0	1	0	1	0	1
Tb927.8.3020	hypothetical protein, conserved	ZUnknown	0.95	2.05	3.66	0.84	1.4042	5397	0	1	1	0.3396	8.76e-06	0.4077	1.09e-10	3.16	1.3e-21	4.4504	9.9e-30	2.126	4.9e-41	2.5793	2.8e-60	1.2904	0	0	0	0	1	0	1	0	1	0	1	0	1	0	1
Tb927.10.13450	hypothetical protein, conserved	ZUnknown	1.11	1.72	4.77	0.83	0.6354	2819	0	1	1	0.0132	0.901	-0.1404	0.0665	1.0223	0.0026	2.3848	3.6e-16	0.2421	0.88	0.1308	0.82	1.3625	0	0	1	0	1	0	1	0	0	0	0	0	1	0	1
Tb927.11.780	hypothetical protein, conserved	ZUnknown	0.7	2.83	4.5	0.71	0.8875	4945	0	1	1	-0.6524	2.7e-28	-0.1423	0.102	3.1023	1.6e-50	3.8344	2e-62	1.6036	5.3e-19	1.6657	1.4e-20	0.7321	0	1	1	0	1	0	1	0	1	0	1	0	1	0	1
Tb927.6.4000	small glutamine-rich tetratricopeptide repeat protein, putative (SGT)	ZUnknown	1.47	1.74	2.37	0.66	0.2347	1342	0	1	1	-0.6206	1.2e-20	-1.1731	3.14e-47	-0.0874	1	0.4572	0.084	-0.8869	2.9e-08	-0.7866	1.2e-06	0.5446	0	1	0	1	0	0	0	0	0	0	0	0	0	0	1
Tb927.11.2860	hypothetical protein, conserved, WD40 repeats	ZUnknown	0.87	2.2	7.35	0.59	1.7195	4309	0	1	1	-0.0433	0.655	0.1647	0.214	4.4028	1.1e-65	5.1919	3.7e-63	3.2633	1.2e-15	2.3144	6.1e-08	0.7891	0	0	1	0	1	0	1	0	1	0	1	0	1	0	1
Tb927.8.4500	eIF4G5	Translation	1.47	2.31	4.87	0.59	0.3932	2407	0	1	1	-0.0604	0.458	-0.621	1.21e-20	1.1709	0.012	2.4049	4.4e-10	-0.0377	1	0.1201	0.84	1.234	0	0	0	1	1	0	1	0	0	0	0	0	1	0	1
Tb927.10.3260	Long-chain-fatty-acid--CoA ligase 5, Acyl-CoA synthetase 5 (LACS 5)	Lipids	1.45	2.17	7.16	0.58	0.0473	1289	0	1	1	-0.3218	5.54e-08	-0.8611	3.57e-19	0.7279	0.044	2.5604	4.3e-20	-0.3924	0.84	-0.2789	0.72	1.8325	0	0	0	1	0	0	1	0	0	0	0	0	1	0	1
Tb927.10.2930	hypothetical protein, conserved	ZUnknown	1.38	2.09	2.07	0.53	-0.3959	1782	0	1	1	0.0615	0.572	-0.4073	0.000112	0.2854	0.95	0.4919	0.37	-0.7763	0.00012	-0.5573	0.014	0.2065	0	0	0	0	0	0	0	0	0	0	0	0	0	0	1
Tb927.4.4490	multidrug resistance protein E,p-glycoprotein (MRPE)	Transporter	1.49	1.78	2.45	0.28	-0.4475	2112	0	1	1	-0.2524	0.000236	-0.8245	5.03e-24	0.0221	1	0.6959	0.11	-0.8064	0.023	-0.5955	0.14	0.6738	0	0	0	1	0	0	0	0	0	0	0	0	1	0	1
Tb927.10.10600	ARP2/3 complex 16kDa subunit, putative	Cytoskeleton	0.91	2.14	1.89	0.12	-2.3708	74	0	1	1	0.2856	0.0989	0.4178	0.23	1.2045	0.034	1.5184	0.0021	0.1087	1	0.5968	0.28	0.3139	0	0	1	0	1	0	1	0	0	0	0	0	0	0	1
Tb927.10.15040	hypothetical protein, conserved	ZUnknown	1.23	3.85	1.33	2.09	2.2388	3899	0	1	0	0.2298	0.00496	-0.0652	0.652	2.9669	1.5e-20	1.5605	7.2e-06	1.0207	0.0014	1.1519	0.00013	-1.4064	0	0	1	0	1	0	1	0	1	0	1	0	0	1	1
Tb927.10.480	hypothetical protein, conserved, poly(Q), Kinetoplastid-specific	ZUnknown	1.24	3.92	1.33	1.99	2.0738	4202	0	1	0	0.6102	5.75e-09	0.3019	0.402	3.5368	2.1e-09	2.0764	0.0015	1.5671	0.0069	1.6634	0.0036	-1.4604	1	0	1	0	1	0	1	0	1	0	1	0	0	1	1
Tb927.6.2030	protein kinase, putative	Protein.kinase	1.15	5.53	0.96	1.29	2.8797	5589	0	1	0	-0.1207	0.153	-0.3212	0.00767	3.4297	1.9e-13	-0.1731	0.89	0.9628	0.07	-0.1211	0.91	-3.6028	0	0	0	0	1	0	0	0	0	0	0	0	0	1	1
Tb927.10.15310	hypothetical protein, conserved, linked to melarsoprol resistance, no yeast/human by NCBI	ZUnknown	1.19	3.49	1.34	0.83	1.1806	5487	0	1	0	-0.1987	0.00693	-0.4482	2.34e-05	3.0048	1.3e-21	1.7588	1.8e-07	1.2023	4.1e-06	1.3335	1.6e-07	-1.246	0	0	0	0	1	0	1	0	1	0	1	0	0	1	1
Tb927.11.3040	hypothetical protein	ZUnknown	1.25	1.23	2.17	4.5	4.5445	724	0	0	1	0.5729	0.000131	0.2551	0.0455	0.299	1	1.0835	0.019	-0.0051	1	-0.0314	0.97	0.7845	0	0	0	0	0	0	1	0	0	0	0	0	1	0	1
Tb927.8.5350	hypothetical protein, conserved	ZUnknown	1.2	0.99	3.06	3.79	3.0761	1308	0	0	1	-0.1748	0.503	-0.4432	0.0111	0.3996	1	1.9881	0.0021	0.4205	0.71	0.3752	0.59	1.5885	0	0	0	0	0	0	1	0	0	0	0	0	1	0	1
Tb927.11.12120	RBP9	RNA.binding	0.9	1.19	6.24	2.18	1.3467	1775	0	0	1	0.2714	0.0015	0.4261	0.0575	2.6184	3.3e-15	4.3	3.4e-14	2.3636	4.1e-08	1.6583	0.00068	1.6816	0	0	1	0	1	0	1	0	1	0	1	0	1	0	1
Tb927.3.4710	hypothetical protein, conserved	ZUnknown	1.17	1.19	2.74	2.06	1.4751	1876	0	0	1	0.209	0.00592	-0.0236	0.868	0.4538	0.97	1.8756	0.0026	0.2086	1	0.4192	0.59	1.4218	0	0	1	0	0	0	1	0	0	0	0	0	1	0	1
Tb927.11.16720	CYC6 mitotic cyclin	Cell.cycle	1.01	1.37	2.98	1.98	1.406	2303	0	0	1	-0.1191	0.138	-0.1384	0.249	2.8958	3.4e-30	3.663	2.2e-24	2.4409	3.5e-11	2.0899	2.9e-08	0.7672	0	0	1	0	1	0	1	0	1	0	1	0	1	0	1
Tb927.6.3070	hypothetical protein, conserved	ZUnknown	1.2	1.05	2.69	1.89	1.1506	764	0	0	1	0.1483	0.0827	-0.1145	0.355	0.5484	0.72	2.1347	1e-06	0.4723	0.68	0.7063	0.18	1.5863	0	0	1	0	0	0	1	0	0	0	0	0	1	0	1
Tb927.6.5010	hypothetical protein, conserved	ZUnknown	0.57	1.2	2.45	1.83	1.3486	821	0	0	1	0.0278	0.789	0.8491	4.76e-05	0.5885	0.9	2.1726	0.00064	0.3277	1	0.8814	0.31	1.5841	0	0	1	0	0	0	1	0	0	0	0	0	1	0	1
Tb927.8.3850	PSP1 C-terminal conserved region, putative	ZUnknown	1.19	1.2	2.32	1.72	1.3524	1859	0	0	1	-0.0723	0.505	-0.3278	0.000412	0.7405	0.27	1.804	0.0001	0.4814	0.67	0.5886	0.34	1.0635	0	0	0	0	0	0	1	0	0	0	0	0	1	0	1
Tb927.8.2780	RBP10	RNA.binding	1.02	1.09	2.04	1.68	1.6057	1090	0	0	1	0.009	0.928	-0.0144	0.91	3.2501	2.2e-17	2.9766	1.7e-06	3.1274	3.5e-11	1.9502	8.9e-05	-0.2735	0	0	1	0	1	0	1	0	1	0	1	0	0	0	1
Tb927.8.4340	hypothetical protein, conserved, signal peptide, 4TM domains, no functional domains or BLASTp hits	ZUnknown	1	1.34	2.51	1.68	1.2183	1748	0	0	1	-0.7451	3.33e-14	-0.7469	2.1e-12	1.2787	0.082	2.3023	9.4e-05	0.8526	0.00041	0.9753	3.7e-05	1.0236	0	1	0	1	0	0	1	0	0	0	0	0	1	0	1
Tb927.6.2450	PKB protein kinase, putative	Protein.kinase	1	1.08	2.07	1.55	1.2469	1381	0	0	1	0.259	0.00252	0.2579	0.0102	-0.0308	1	1.0559	0.22	-0.1425	1	0.0083	1	1.0867	0	0	0	0	0	0	0	0	0	0	0	0	1	0	1
Tb927.7.3150	CRAL/TRIO domain containing protein, putative	ZUnknown	0.91	1.09	3.96	1.52	1.5753	1505	0	0	1	0.5225	3.23e-09	0.6663	9.37e-15	1.2599	2.6e-05	2.51	1.1e-19	1.1295	0.00077	0.5239	0.27	1.2501	0	0	1	0	1	0	1	0	1	0	0	0	1	0	1
Tb927.10.3960	hypothetical protein, conserved	ZUnknown	1.4	1.22	2.88	1.52	0.8453	1537	0	0	1	-0.089	0.636	-0.5728	4.31e-07	0.0436	1	1.1659	0.21	-0.2423	1	-0.3584	0.56	1.1223	0	0	0	0	0	0	0	0	0	0	0	0	1	0	1
Tb927.8.6590	Outer mitochondrial membrane transport complex protein/Glutathione S-transferase, C-terminal domain containing protein, putative	ZUnknown	1.23	1.36	2.08	1.48	1.5769	1204	0	0	1	-0.4511	1.24e-07	-0.7467	1.61e-15	0.4202	0.83	1.383	0.00098	-0.0246	1	0.3241	0.34	0.9628	0	0	0	1	0	0	1	0	0	0	0	0	1	0	1
Tb927.11.10940	hypothetical protein, conserved, no domains	ZUnknown	1	1.22	2.77	1.46	1.2869	2298	0	0	1	-0.0296	0.785	-0.0317	0.824	1.1747	0.029	2.3152	1.1e-05	0.8829	0.19	0.8432	0.18	1.1405	0	0	1	0	1	0	1	0	0	0	0	0	1	0	1
Tb927.5.1570	ZC3H12	RNA.binding	1.23	1.36	2.12	1.45	1.2037	2713	0	0	1	-0.0705	0.591	-0.3665	3.18e-07	0.5477	0.48	1.0477	0.022	0.1044	1	-0.0335	0.97	0.5	0	0	0	0	0	0	1	0	0	0	0	0	0	0	1
Tb927.8.6090	ubiquitin-conjugating enzyme e2, putative	Ubiquitin.proteasome	0.65	1.06	2.2	1.26	0.7513	1610	0	0	1	-0.1801	0.0992	0.447	5.42e-07	0.947	0.009	2.1498	7.5e-13	0.86	0.011	1.0104	0.00095	1.2028	0	0	0	0	0	0	1	0	0	0	1	0	1	0	1
Tb927.11.3760	hypothetical protein	ZUnknown	1.02	1.11	2.51	1.22	0.6508	2198	0	0	1	-0.2242	0.00732	-0.2591	0.00276	0.9759	0.12	2.2715	4.9e-06	0.8238	0.034	0.9454	0.0075	1.2956	0	0	0	0	0	0	1	0	0	0	0	0	1	0	1
Tb927.4.1000	hypothetical protein, conserved	ZUnknown	1.36	1.22	8.59	1.21	2.5435	3312	0	0	1	0.561	1.25e-09	0.1211	0.246	0.9261	0.00095	3.3015	2.4e-24	0.6392	0.026	0.1987	0.69	2.3754	0	0	1	0	0	0	1	0	0	0	0	0	1	0	1
Tb927.7.3690	hypothetical protein, probably a 3'-UTR	ZUnknown	0.85	1.15	2.12	1.19	1.251	998	0	0	1	-0.0104	0.955	0.2318	0.0373	0.7446	0.66	1.1934	0.12	0.5403	0.28	0.1061	0.89	0.4488	0	0	0	0	0	0	0	0	0	0	0	0	0	0	1
Tb927.11.3300	SAS4	Cytoskeleton	1.03	1.17	2.1	1.12	0.7108	2677	0	0	1	-0.2206	0.00687	-0.2581	0.0031	0.8641	0.083	2.064	7.3e-08	0.6431	0.29	0.9931	0.018	1.1999	0	0	0	0	0	0	1	0	0	0	0	0	1	0	1
Tb927.10.14480	hypothetical protein, conserved	ZUnknown	1.02	1.36	2.01	1.1	1.2141	968	0	0	1	0.3221	2.54e-05	0.2869	0.0024	1.4028	0.00023	2.1271	9.7e-10	0.961	3.4e-06	1.1215	2.6e-08	0.7243	0	0	0	0	1	0	1	0	0	0	1	0	1	0	1
Tb927.11.15320	hypothetical protein	ZUnknown	1.35	1.4	2.09	1.09	1.4489	972	0	0	1	0.9508	2.4e-40	0.5209	3.3e-05	1.5547	8.2e-09	2.4541	3.2e-20	1.0642	7.1e-08	1.3895	9.7e-13	0.8994	1	0	0	0	1	0	1	0	1	0	1	0	1	0	1
Tb927.11.7810	hypothetical protein	ZUnknown	0.54	1.39	2.22	1.08	1.3785	284	0	0	1	-0.4108	2.54e-05	0.4908	0.000168	2.9474	7.3e-12	3.5271	5.6e-10	2.4752	0.0022	2.3747	0.0064	0.5797	0	0	0	0	1	0	1	0	1	0	1	0	0	0	1
Tb927.5.3290	Protein of unknown function, putative	ZUnknown	1.19	0.97	2.4	1.06	1.0909	1682	0	0	1	0.3075	7.15e-07	0.053	0.733	2.3416	1.1e-10	3.6971	1e-17	2.3831	3.5e-08	2.4323	2.7e-08	1.3555	0	0	1	0	1	0	1	0	1	0	1	0	1	0	1
Tb927.1.1530	protein kinase, putative	Protein.kinase	1.18	1.49	2.59	0.99	0.7796	3626	0	0	1	-0.248	0.000509	-0.4914	0.000111	0.7192	0.37	1.5422	0.0071	0.1458	1	0.1689	0.87	0.823	0	0	0	0	0	0	1	0	0	0	0	0	1	0	1
Tb927.1.4650	cyclin-like F-box protein (CFB2)	Ubiquitin.proteasome	0.86	1.14	3.78	0.9	1.2286	3648	0	0	1	-0.7768	1.13e-32	-0.5645	0.0122	1.5509	0.00011	4.0741	2.5e-19	1.359	0.33	2.1556	0.016	2.5232	0	1	0	0	1	0	1	0	0	0	1	0	1	0	1
Tb927.2.2720	MEKK1 or FlaK protein kinase, putative	Protein.kinase	1.49	1.44	2.37	0.86	1.4258	1952	0	0	1	0.1193	0.123	-0.4562	6.59e-05	0.8592	0.041	1.8596	9.4e-07	0.3341	0.92	0.6127	0.27	1.0004	0	0	0	0	0	0	1	0	0	0	0	0	1	0	1
Tb927.10.9610	hypothetical protein	ZUnknown	1.1	0.73	5.55	0.81	1.844	1860	0	0	1	0.3886	9.41e-06	0.2448	0.0365	3.2518	3.4e-09	3.7452	1e-07	3.71	4.3e-11	1.2735	0.084	0.4934	0	0	0	0	1	0	1	0	1	0	0	0	0	0	1
Tb927.10.2650	hypothetical protein, conserved	ZUnknown	1.37	1.14	2.2	0.78	0.4258	913	0	0	1	-0.1109	0.222	-0.5615	1.09e-07	0.2379	1	1.0942	0.00035	0.0517	1	-0.0464	0.92	0.8563	0	0	0	0	0	0	1	0	0	0	0	0	1	0	1
Tb927.11.15950	amino acid transporter, putative	Amino.acid.transport	1.03	1	2.06	0.77	0.3296	2660	0	0	1	-0.2677	2.21e-05	-0.3149	0.000611	0.1525	1	1.6138	0.0063	0.1597	1	0.5717	0.24	1.4613	0	0	0	0	0	0	1	0	0	0	0	0	1	0	1
Tb927.11.14910	protein phosphatase 2C, putative	Protein.phosphatase	1.04	1.36	2.19	0.66	0.038	1616	0	0	1	0.0636	0.507	0.0097	0.929	0.4695	0.072	1.3494	7.8e-13	0.026	1	0.2197	0.33	0.8799	0	0	1	0	0	0	1	0	0	0	0	0	1	0	1
Tb927.11.1420	hypothetical protein, conserved	ZUnknown	1.26	0.94	2.14	0.65	0.251	462	0	0	1	-1.4759	1.57e-124	-1.8037	2.28e-47	-0.2882	1	0.4539	0.57	-0.194	1	-0.6463	0.48	0.7421	0	1	0	1	0	0	0	0	0	0	0	0	1	0	1
Tb927.3.3550	hypothetical protein, conserved	ZUnknown	1.24	1.22	2.56	0.44	0.1763	1349	0	0	1	0.0856	0.295	-0.2242	0.00712	0.475	0.49	1.304	3.8e-05	0.1919	1	-0.0508	0.95	0.829	0	0	0	0	0	0	1	0	0	0	0	0	1	0	1
Tb927.10.10150	hypothetical protein, conserved	ZUnknown	1.05	1.16	2.23	0.38	-0.2981	368	0	0	1	0.1515	0.0926	0.0812	0.742	1.2966	0.0085	1.4101	0.0021	1.0819	0.0013	0.2559	0.7	0.1135	0	0	1	0	1	0	1	0	1	0	0	0	0	0	1
Tb927.10.11080	paraflagellar rod protein,I17 antigen	Cytoskeleton	1.1	1.25	2.08	0.19	-1.5423	4678	0	0	1	0.0355	0.702	-0.0988	0.193	0.3976	0.99	0.9105	0.19	0.0805	1	-0.1446	0.87	0.5129	0	0	1	0	0	0	0	0	0	0	0	0	0	0	1
Tb927.7.1850	hypothetical protein, conserved	ZUnknown	2.13	1.76	2.41	1.89		562	1	1	1	1.9773	1.1e-137	0.8875	1.03e-13	1.6128	0.00016	2.1836	3.1e-08	0.7936	0.00069	0.9163	3.7e-05	0.5708	1	0	1	0	1	0	1	0	0	0	0	0	0	0	0
Tb11.v5.0730	PUF4 pumillio RNA binding protein 4, putative	RNA.binding	1.71	13.84	10.58	1.19		713	1	1	1	0.6427	2.51e-09	-0.1338	0.504	4.2937	4.2e-30	4.3787	1.6e-10	0.5027	0.56	0.9748	0.018	0.085	1	0	1	0	1	0	1	0	0	0	0	0	0	0	0
Tb11.v5.0745	hypothetical protein, conserved	ZUnknown	2.34	2.21	3.54	1.18		5409	1	1	1	0.4932	1.79e-08	-0.7349	1.3e-26	0.5149	0.081	1.1266	2.4e-07	-0.6269	0.68	-0.6987	0.39	0.6117	0	0	0	1	0	0	1	0	0	0	0	0	1	0	0
Tb927.7.5940	Protein Associated with Differentiation (TbPAD2)	Signalling	1.51	1.54	1.53	1.13		818	1	1	1	0.584	1.29e-13	-0.0062	0.975	-0.0929	1	0.4489	0.45	-0.7121	0.0029	-0.1638	0.73	0.5418	1	0	1	0	0	0	0	0	0	0	0	0	0	0	0
Tb11.v5.0569	amino acid transporter, putative	Transporter	1.66	1.62	2.57	1.07		4149	1	1	1	1.1291	2.4e-34	0.3974	3.6e-07	0.8203	0.14	1.5485	8.4e-05	0.125	0.91	0.1873	0.39	0.7282	1	0	0	0	0	0	1	0	0	0	0	0	1	0	0
Tb927.7.3020	Nitroreductase family, putative	ZUnknown	2.34	1.91	2.54	0.98		650	1	1	1	1.7321	1.65e-125	0.503	8.02e-06	-0.3586	0.92	0.4694	0.5	-1.2911	0.0002	-0.8737	0.025	0.828	1	0	0	0	0	0	0	0	0	1	0	0	1	0	0
Tb927.10.5930	NEK17 protein kinase	Protein.kinase	1.53	1.77	1.91	0.83		1225	1	1	1	0.1033	0.322	-0.513	0.000842	0.0839	1	0.3922	0.22	-0.7376	7.3e-05	-0.5415	0.0097	0.3083	0	0	0	0	0	0	0	0	0	0	0	0	0	0	0
Tb927.9.4230	fatty acyl CoA synthetase 4 (ACS4)	Lipids	2.24	2.06	2.73	0.38		855	1	1	1	0.2353	0.000415	-0.9302	3.68e-28	0.1326	1	0.4613	0.11	-0.9076	3.4e-05	-0.9854	3.1e-06	0.3287	0	0	0	1	0	0	0	0	0	0	0	0	0	0	0
Tb11.v5.0537	polyubiquitin, putative	Ubiquitin.proteasome	1.75	1.75	2.08	0.29		6245	1	1	1	0.3552	3.35e-06	-0.4525	1.84e-10	0.4738	0.076	0.5809	0.01	-0.3314	0.29	-0.4757	0.028	0.1071	0	0	0	0	0	0	0	0	0	0	0	0	0	0	0
Tb927.11.9920	polyubiquitin, putative	Ubiquitin.proteasome	4.25	2.97	3.72	0.28		950	1	1	1	0.4183	9.75e-12	-1.6693	3.76e-33	0.5248	0.023	0.5202	0.018	-1.0448	4.2e-06	-1.3733	2.2e-10	-0.0046	0	0	0	1	0	0	0	0	0	1	0	1	0	0	0
Tb11.v5.0509	hypothetical protein, conserved	ZUnknown	2.76	2.91	1.46	0.8		3263	1	1	0	0.6788	1.86e-09	-0.7871	2.53e-09	0.1671	1	-0.4152	0.83	-1.3721	0.042	-0.9574	0.26	-0.5823	1	0	0	1	0	0	0	0	0	1	0	0	0	0	0
Tb927.2.1310	leucine-rich repeat protein LRRP, pseudogene	LRRP	1.52	1.77	1.31	0.71		4501	1	1	0	-0.4022	7.44e-05	-1.0051	2.91e-17	-0.0341	1	-0.2429	0.85	-0.855	0.37	-0.6326	0.52	-0.2088	0	0	0	1	0	0	0	0	0	0	0	0	0	0	0
Tb927.2.4920	hypothetical protein, conserved, signal pep, lectin-like domain	ZUnknown	1.69	1.41	1.83	1.5		694	1	0	1	-0.2052	0.118	-0.9627	1.33e-14	-0.2287	1	-0.286	0.74	-0.7266	0.027	-1.1551	4.2e-05	-0.0573	0	0	0	1	0	0	0	0	0	0	0	1	0	0	0
Tb11.v5.0221	transporter, putative	Transporter	1.92	1.46	1.56	1.36		3513	1	0	1	1.2305	5.56e-32	0.2866	0.0504	0.5273	0.87	0.9715	0.19	-0.0218	1	0.3301	0.69	0.4442	1	0	1	0	0	0	0	0	0	0	0	0	0	0	0
Tb11.v5.0249	protein kinase, putative	Protein.kinase	1.78	1.31	1.67	1.14		566	1	0	1	0.4327	7.17e-05	-0.3966	0.0307	0.1645	0.92	0.4523	0.034	-0.2243	0.87	-0.2911	0.45	0.2878	0	0	0	0	0	0	0	0	0	0	0	0	0	0	0
Tb927.2.6220	adenosine transporter 2, putative (TbNT4)	Nucleotides	1.67	0.6742	2.0526	NA		0	1	0	0	-2.5635	4.44e-107	-3.2994	2.53e-08	0.4918	1	2.0526	0.550597	-0.1824	NA	0	NA	1.5608	0	1	0	1	0	0	0	0	0	0	0	0	1	0	0
Tb927.2.6240	adenosine transporter 2 (TbNT5)	Nucleotides	1.58	1.6878	3.8872	NA		0	1	0	0	-1.7085	9.64e-19	-2.3655	1.25e-10	0.5552	1	1.6944	0.693377	-1.1326	1	-2.1928	0.650465	1.1392	0	1	0	1	0	0	0	0	0	0	0	0	1	0	0
Tb927.4.1210	hypothetical protein	ZUnknown	3.29	0.4425	-0.0691	NA		0	1	0	0	1.5197	0.501	-0.1978	0.686	1.7236	1	1.072	0.834109	1.2811	0.92479	1.1411	0.672953	-0.6516	0	0	1	0	0	0	0	0	0	0	0	0	0	1	0
Tb927.2.6280	adenosine transporter 2, putative (TbNT7)	Nucleotides	3.49	0.756	1.7948	NA		0	1	0	0	-1.5008	4.21e-13	-3.3052	2.33e-18	0.6086	1	0.7342	0.883359	-0.1474	1	-1.0606	0.874907	0.1256	0	1	0	1	0	0	0	0	0	0	0	0	0	0	0
Tb927.9.17640	hypothetical protein, conserved	ZUnknown	1.95	1.14	1.07	1.91		0	1	0	0	0.3697	0.222	-0.5913	0.449	0.0327	1	-0.1756	0.9	-0.1501	1	-0.2753	0.85	-0.2083	0	0	1	0	0	0	0	0	0	0	0	0	0	0	0
Tb11.v5.1061	hypothetical protein, conserved	ZUnknown	3.16	1.11	1.21	1.8		137	1	0	0	-0.0787	0.653	-1.7365	0.0744	-0.1437	1	-0.2636	0.41	-0.294	1	-0.541	0.68	-0.1199	0	0	1	0	0	0	0	0	0	0	0	0	0	0	0
Tb927.7.6000	protein associated with differentiation 8, PAD8	Transporter	1.9	0.99	0.61	1.46		0	1	0	0	-0.874	8.11e-27	-1.8	7.61e-05	-0.5129	0.5	-0.4956	0.39	-0.4962	0.77	0.2065	0.85	0.0173	0	1	0	1	0	0	0	0	0	0	0	0	0	0	0
Tb11.v5.0686	hypothetical protein, conserved	ZUnknown	1.52	0.99	0.99	1.15		5005	1	0	0	0.4125	1.4e-05	-0.1876	0.0353	0.0006	1	0.0837	0.85	0.0127	1	0.0925	0.85	0.0831	0	0	0	0	0	0	0	0	0	0	0	0	0	0	0
Tb11.v5.0781	MIZ/SP-RING zinc finger, putative	ZUnknown	3.05	0.71	0.5	0.94		997	1	0	0	0.1463	0.331	-1.4617	4.01e-16	0.0439	1	-0.2463	0.71	0.5301	0.78	0.7554	0.35	-0.2902	0	0	0	1	0	0	0	0	0	0	0	0	0	0	0
Tb927.1.2260	calpain-like protein fragment, putative	Protease	1.52	1.07	1.11	0.93		1740	1	0	0	0.2397	0.00467	-0.3616	0.00321	-0.3262	1	0.1057	0.94	-0.4268	0.96	-0.0422	0.98	0.4319	0	0	0	0	0	0	0	0	0	0	0	0	0	0	0
Tb11.v5.0852	hypothetical protein, conserved	ZUnknown	1.95	1.42	1.16	0.79		4329	1	0	0	0.3185	0.00541	-0.6482	7.75e-10	0.0714	1	-0.1334	0.81	-0.4357	0.045	-0.3426	0.14	-0.2048	0	0	0	1	0	0	0	0	0	0	0	0	0	0	0
Tb927.3.2477	hypothetical protein	ZUnknown	1.6	1.13	1.05	0.75		952	1	0	0	-0.3165	0.072	-0.9928	3.81e-11	-0.8917	0.33	-0.926	0.21	-1.071	0.012	-0.9964	0.019	-0.0343	0	0	0	1	0	0	0	0	0	1	0	1	0	0	0
Tb11.v5.0305	TFIID-like protein, putative	RNA.synthesis	1.56	0.66	0.75	0.71		1860	1	0	0	0.3006	0.0862	-0.3399	0.000344	-0.1337	1	-0.0004	1	0.4744	0.013	0.4096	0.039	0.1333	0	0	0	0	0	0	0	0	0	0	0	0	0	0	0
Tb11.v5.0627	lipase domain protein, putative	Enzyme	1.66	0.71	0.61	0.62		12083	1	0	0	0.2947	0.00763	-0.4332	5.66e-08	0.0045	1	-0.2262	0.78	0.5035	0.15	0.4913	0.13	-0.2307	0	0	0	0	0	0	0	0	0	0	0	0	0	0	0
Tb927.11.7214	hypothetical protein, conserved, SAm-dependent methyltransferase domain	ZUnknown	3.33	1.13	1.01	0.54		0	1	0	0	0.0795	0.547	-1.6568	0.0151	0.0437	1	0.0574	0.89	-0.137	1	0.0488	0.99	0.0137	0	0	0	1	0	0	0	0	0	0	0	0	0	0	0
Tb11.v5.0436	Leucine Rich Repeat, putative	ZUnknown	1.77	1.12	0.86	0.44		6474	1	0	0	0.2722	0.00801	-0.5515	3.77e-07	0.0222	1	-0.2192	0.61	-0.1449	1	-0.0049	1	-0.2414	0	0	0	0	0	0	0	0	0	0	0	0	0	0	0
Tb11.v5.0685	hypothetical protein, conserved	ZUnknown	1.55	1.08	1.11	0.4		3910	1	0	0	0.2065	0.132	-0.425	0.000241	-0.0984	1	-0.4267	0.35	-0.2117	1	-0.578	0.19	-0.3283	0	0	0	0	0	0	0	0	0	0	0	0	0	0	0
Tb11.v5.0681	hypothetical protein, conserved	ZUnknown	1.92	1.28	1.01	0.4		4466	1	0	0	-0.2086	0.038	-1.1477	8.92e-71	-0.161	1	-0.4693	0.57	-0.5193	0.16	-0.4774	0.17	-0.3083	0	0	0	1	0	0	0	0	0	0	0	0	0	0	0
Tb11.02.5070b	hypothetical protein, conserved	ZUnknown	1.56	1.18	1.03	0.39		208	1	0	0	0.6088	4.12e-08	-0.0328	0.928	0.2722	1	0.4772	0.44	0.0297	1	0.4293	0.57	0.205	1	0	1	0	0	0	0	0	0	0	0	0	0	0	0
Tb11.v5.0696	TerD domain containing protein, putative	ZUnknown	1.59	1.08	0.84	0.38		299	1	0	0	-0.0013	0.993	-0.6675	0.000321	0.0864	1	-0.1156	0.9	-0.0209	1	0.1381	0.82	-0.202	0	0	0	1	0	0	0	0	0	0	0	0	0	0	0
Tb11.v5.0555	hypothetical protein, conserved	ZUnknown	1.54	0.98	0.84	0.27		4364	1	0	0	0.4567	4.72e-11	-0.1673	0.158	-0.0047	1	-0.002	1	0.0184	1	0.2449	0.69	0.0027	0	0	1	0	0	0	0	0	0	0	0	0	0	0	0
Tb11.v5.0227	75 kDa invariant surface glycoprotein, putative	Membrane.protein	1.58	1.2	1.07	0.05		3858	1	0	0	0.3274	0.0256	-0.3341	0.00183	0.3842	0.84	0.1434	0.91	0.1163	1	0.0447	0.97	-0.2408	0	0	0	0	0	0	0	0	0	0	0	0	0	0	0
Tb11.v5.0663	hypothetical protein, conserved	ZUnknown	0.83	1.6	2.28	2.14		4264	0	1	1	0.0692	0.618	0.3355	0.0117	0.6072	0.68	1.3412	0.02	-0.0718	1	0.1542	0.77	0.734	0	0	0	0	0	0	1	0	0	0	0	0	1	0	0
Tb11.v5.0809	TPR repeat, putative	ZUnknown	1.37	2.43	4.88	2.05		5536	0	1	1	0.0144	0.917	-0.4429	2.26e-05	1.3445	0.011	2.8411	9.4e-11	0.0654	1	0.5534	0.11	1.4966	0	0	0	0	1	0	1	0	0	0	0	0	1	0	0
Tb927.3.3930	DRBD6B	RNA.binding	1.47	2.21	8.35	1.95		2644	0	1	1	0.7964	3.11e-19	0.2398	0.58	2.0219	1.1e-06	4.1776	2.8e-21	0.8792	0.37	1.1155	0.11	2.1557	1	0	1	0	1	0	1	0	0	0	0	0	1	0	0
Tb11.v5.0238	Kinesin associated protein, putative	ZUnknown	1.26	1.93	15.13	1.92		2638	0	1	1	0.3679	0.000987	0.0348	0.832	0.811	0.4	3.8661	1.7e-13	-0.1384	1	-0.0531	0.94	3.0551	0	0	1	0	0	0	1	0	0	0	0	0	1	0	0
Tb927.8.8300	AAT10	Amino.acid.transport	1.14	1.74	3.95	1.92		1294	0	1	1	0.2542	0.0052	0.0595	0.824	0.7663	0.48	1.9279	0.00022	-0.0306	1	-0.0538	0.95	1.1616	0	0	1	0	0	0	1	0	0	0	0	0	1	0	0
Tb927.9.15610	BARP protein	Membrane.protein	2.52	4.15	4.93	1.53		483	0	1	1	1.7015	1.33e-38	0.366	0.377	1.6733	1.8e-07	2.4632	1.7e-14	-0.3808	1	0.1604	0.92	0.7899	1	0	1	0	1	0	1	0	0	0	0	0	1	0	0
Tb11.v5.0502	hypothetical protein, conserved	ZUnknown	0.99	2.04	3.9	1.4		2935	0	1	1	-0.3126	0.000591	-0.2983	0.0197	0.6715	0.67	2.0049	0.00068	-0.3555	0.76	0.0418	0.97	1.3334	0	0	0	0	0	0	1	0	0	0	0	0	1	0	0
Tb927.10.12800	ZC3H38	RNA.binding	1.05	2.5	4.83	1.38		3420	0	1	1	-0.5891	2.35e-13	-0.6531	0.00929	2.2657	0.0016	3.5751	4.9e-06	0.9409	0.3	1.3017	0.044	1.3094	0	1	0	1	1	0	1	0	0	0	1	0	1	0	0
Tb927.5.3770	hypothetical protein, conserved	ZUnknown	1.23	2.01	1.96	1.36		441	0	1	1	1.9523	5.69e-93	1.6546	1.68e-16	1.7456	8.7e-11	2.5074	7.4e-21	0.7366	0.18	1.5386	3.2e-05	0.7618	1	0	1	0	1	0	1	0	0	0	1	0	1	0	0
Tb927.9.11100	PKAC1 protein kinase A catalytic subunit isoform 1	Protein.kinase	1.04	1.7	6.25	1.31		1696	0	1	1	-0.1916	0.0153	-0.2416	0.0131	1.7811	1.3e-10	3.7321	1.2e-18	1.0174	0.033	1.0884	0.02	1.951	0	0	0	0	1	0	1	0	1	0	1	0	1	0	0
Tb11.v5.0622	variant surface glycoprotein (VSG, atypical), putative	VSG	1.4	8.88	4.66	1.31		5880	0	1	1	0.4906	0.0639	0.0038	0.991	2.0621	4.5e-09	1.5325	6.2e-06	-1.0891	0.022	-0.6881	0.25	-0.5296	0	0	1	0	1	0	1	0	0	1	0	0	0	0	0
Tb927.10.4420	hypothetical protein	ZUnknown	1.48	3.01	1.95	1.28		418	0	1	1	0.1863	0.173	-0.3796	0.0409	1.6263	0.00025	1.1673	0.017	0.038	1	0.2031	0.87	-0.459	0	0	0	0	1	0	1	0	0	0	0	0	0	0	0
Tb11.v5.0338	hypothetical protein, conserved	ZUnknown	1.45	2.63	2.83	1.28		3917	0	1	1	0.5861	2.8e-08	0.0504	0.549	1.1482	0.002	1.1322	0.081	-0.2474	1	-0.3693	0.51	-0.016	1	0	1	0	1	0	1	0	0	0	0	0	0	0	0
Tb927.9.11030	PKAC2 protein kinase A catalytic subunit isoform 2	Protein.kinase	1.24	1.6	4.92	1.24		2568	0	1	1	-0.1859	0.0153	-0.4906	7e-06	2.681	1.1e-28	4.3813	7e-39	1.999	1.5e-17	2.0814	5.2e-18	1.7003	0	0	0	0	1	0	1	0	1	0	1	0	1	0	0
Tb11.v5.0510	Gp63-3 surface protease homolog, putative	Membrane.protein	5.07	3.84	4.67	1.23		7302	0	1	1	2.0072	2.35e-27	-0.3349	0.000154	1.4959	0.0041	2.09	0.0019	-0.4454	0.81	-0.1322	0.9	0.5941	1	0	0	0	1	0	1	0	0	0	0	0	1	0	0
Tb11.v5.0513	NLI interacting factor-like phosphatase, putative	ZUnknown	1.04	3.2	2.45	1.02		2674	0	1	1	1.2939	1.24e-52	1.2441	3.16e-32	2.7015	1.5e-14	1.9038	0.0016	1.024	0.00044	0.6086	0.082	-0.7977	1	0	1	0	1	0	1	0	1	0	0	0	0	1	0
Tb11.v5.0470	receptor-type adenylate cyclase GRESAG 4, putative	ESAG	4.22	3.15	5.09	1		2798	0	1	1	1.3807	9.39e-67	-0.6971	3.37e-36	1.204	0.001	1.8491	2.9e-08	-0.4519	0.24	-0.4976	0.12	0.6451	1	0	0	1	1	0	1	0	0	0	0	0	1	0	0
Tb11.v5.0649	serine palmitoyltransferase, putative	Lipids	1.23	3.21	16.78	0.92		3944	0	1	1	0.1755	0.0496	-0.1254	0.0838	1.6351	1.3e-07	4.1475	3.3e-16	-0.0453	1	0.0788	0.88	2.5124	0	0	1	0	1	0	1	0	0	0	0	0	1	0	0
Tb11.v5.0763	MIF4G domain containing protein, putative	ZUnknown	0.84	1.81	3.91	0.67		1506	0	1	1	-0.1455	0.0859	0.1007	0.355	1.2663	0.0004	2.5482	4.2e-14	0.414	0.088	0.5793	0.0029	1.2819	0	0	1	0	1	0	1	0	0	0	0	0	1	0	0
Tb927.10.5160	hypothetical protein	ZUnknown	1	6.86	1.65	0.66		4244	0	1	1	0.0021	0.994	0.0051	0.99	4.4268	6.1e-06	1.9572	0.049	1.648	0.0024	1.2357	0.037	-2.4696	0	0	1	0	1	0	1	0	1	0	1	0	0	1	0
Tb927.9.12610	glycerol kinase, glycosomal (glk1)	Glucose.glycerol	1.28	1.69	2.07	0.36		641	0	1	1	-1.1688	6.78e-45	-1.5285	1.12e-58	0.2701	0.77	0.8289	0.00054	-0.4893	0.054	-0.2186	0.56	0.5588	0	1	0	1	0	0	0	0	0	0	0	0	0	0	0
Tb11.v5.0638	serine carboxypeptidase III precursor, putative (CBP1)	Protease	1.4	2.29	1.7	0.35		1057	0	1	1	0.4213	3.98e-07	-0.0667	0.675	0.5849	0.0094	0.5193	0.031	-0.6134	0.18	-0.2487	0.7	-0.0656	0	0	1	0	0	0	0	0	0	0	0	0	0	0	0
Tb11.v5.0375	hypothetical protein, conserved	ZUnknown	1.32	3.03	1.2	1.38		4512	0	1	0	0.5827	2.17e-06	0.1788	0.626	3.093	2.9e-06	1.7137	0.034	1.4954	0.0051	1.4474	0.0088	-1.3793	0	0	1	0	1	0	1	0	1	0	1	0	0	1	0
Tb927.11.1510	leucine rich repeat protein, putative	LRRP	0.62	2.54	1.36	0.41		332	0	1	0	-1.2592	1.06e-18	-0.5774	0.0736	-0.2498	1	-0.6085	0.77	-1.5965	0.00045	-1.0511	0.058	-0.3587	0	1	1	0	0	0	0	0	0	1	0	0	0	0	0
Tb927.5.790	CK1.1 casein kinase 1	Protein.kinase	1.24	1.23	2.06	2.03		1811	0	0	1	0.279	0.000404	-0.0307	0.856	-0.1241	1	0.9347	0.13	-0.4252	0.75	-0.1087	0.91	1.0588	0	0	1	0	0	0	0	0	0	0	0	0	1	0	0
Tb927.11.12420	KKT19 Kinetochore protein, CLK2 protein kinase,	Cell.cycle	0.89	1.37	2.21	1.51		2825	0	0	1	-0.1264	0.0827	0.0404	0.768	1.4164	0.0031	2.2485	1.7e-07	0.9588	2.4e-05	1.1071	3.9e-07	0.8321	0	0	1	0	1	0	1	0	0	0	1	0	1	0	0
Tb927.8.4720	AAT5 Arginine transporter	Amino.acid.transport	1.2	1.41	2.41	1.07		1392	0	0	1	1.1177	7.17e-29	0.8521	6.63e-14	0.7039	0.26	1.527	0.0001	0.2132	0.75	0.255	0.4	0.8231	1	0	1	0	0	0	1	0	0	0	0	0	1	0	0
Tb927.11.5855	hypothetical protein	ZUnknown	0.73	1.21	2.25	1.06		462	0	0	1	-0.4707	0.113	-0.0241	0.888	-0.0072	1	0.5101	0.84	-0.285	1	-0.6619	0.49	0.5173	0	0	1	0	0	0	0	0	0	0	0	0	0	0	0
Tb927.11.12710	variant surface glycoprotein (VSG)-related, putative	VSG	1.67	1.36	2.09	0.92		1429	0	0	1	1.1021	7.66e-12	0.364	0.0313	0.9431	0.12	1.3837	0.019	0.5005	0.81	0.3197	0.74	0.4406	1	0	0	0	0	0	1	0	0	0	0	0	0	0	0
Tb11.v5.0626	protein kinase, putative	Protein.kinase	1.07	1.49	2.29	0.88		8579	0	0	1	0.0907	0.492	-0.0129	0.912	0.4595	0.63	0.9333	0.034	-0.1169	1	-0.2604	0.43	0.4738	0	0	1	0	0	0	0	0	0	0	0	0	0	0	0
Tb11.v5.0825	fatty acyl CoA synthetase, putative	Lipids	0.85	1.38	3.74	0.45		4531	0	0	1	-0.2918	0.000175	-0.0499	0.631	0.6373	0.19	1.2	0.011	0.1723	1	-0.7049	0.34	0.5627	0	0	1	0	0	0	1	0	0	0	0	0	0	0	0
Tb11.v5.0233	cyclic nucleotide-binding domain containing protein, putative	ZUnknown	0.99	1.28	2.54	0.29		2214	0	0	1	-0.1832	0.00666	-0.1654	0.11	0.4981	0.48	1.4786	5.7e-06	0.1455	1	0.1339	0.87	0.9805	0	0	1	0	0	0	1	0	0	0	0	0	1	0	0
[truncated: 7 more columns]

## Sheet: 3. UTR more than CDS examples
GeneID		Procyclic WC log2 UTR-log2 CDS	Bloodstream WC log2 UTR-log2 CDS	Procyclic CYT log2 UTR-log2 CDS	Procyclic WC CDS/UTR	Bloodstream WC CDS/UTR	Procyclic CYT CDS/UTR	baseMean whole cell CDS
Tb927.10.13580	major facilitator superfamily protein (MFS), putative	0.7002	-0.1382	0.5967	0.62	1.1	0.66	2693	Unclear
Tb927.10.12590	hypothetical protein, conserved	0.7266	0.5421	0.8015	0.6	0.69	0.57	2138	Alternative splice in 3'-UTR giving separate RNA
Tb927.9.11050	4E-IP, 4EIP, 4E-interacting protein, putative	0.6709	-0.2926	1.3192	0.63	1.22	0.4	1645	Alternative splice in 3'-UTR giving separate RNA
Tb927.5.2130	Lariat debranching enzyme, C-terminal domain containing protein, putative	1.754	0.3441	2.0177	0.3	0.79	0.25	1561	3'-UTR overlaps next mRNA
Tb927.11.14090	DRBD18	1.9622	-0.6914	2.6935	0.26	1.61	0.15	1552	RNAi target
Tb927.11.6330	6-phosphoglucolactonase	1.2476	0.5663	1.2068	0.42	0.68	0.43	1113	3'-bias in cytoplasmic +tet reads
Tb927.9.8905	hypothetical protein	0.862	0.2057	1.0025	0.55	0.87	0.5	854	not in the database for IGR
Tb927.2.3910	beta-ketoacyl synthase family protein, putative	1.654	0.2686	1.6291	0.32	0.83	0.32	851	3'-UTR overlaps next mRNA
Tb927.7.6700	hypothetical protein	0.7334	0.4763	0.9254	0.6	0.72	0.53	677	Many mis-matched reads
Tb927.6.640	ALPH1 decapping enzyme	1.0476	-0.1562	0.6449	0.48	1.11	0.64	478	strong 5' bias in -tet reads - also in coding region
Tb927.6.490	procyclin associated gene 3 (PAG3)	0.9949	0.337	0.7718	0.5	0.79	0.59	387	repeated
Tb927.11.16550	ZC3H46	0.6325	-0.416	0.729	0.65	1.33	0.6	381	irregular coverage
Tb927.6.460	procyclin associated gene 3 (PAG3)	1.0789	0.6897	1.4259	0.47	0.62	0.37	348	repeated
Tb927.6.2830	TBC-D3 likely GAP	0.6745	-0.056	0.8618	0.63	1.04	0.55	292	Alternative splice in 3'-UTR giving separate RNA
Tb927.8.880	hypothetical protein	0.788	0.2233	1.2955	0.58	0.86	0.41	289	not enough reads
Tb927.2.1180	retrotransposon hot spot protein 3 (RHS3), putative	0.9392	0.1887	1.1599	0.52	0.88	0.45	230	repeated
Tb927.8.7910	GRESAG 4 pseudogene	2.4574	0.6626	0.7875	0.18	0.63	0.58	196	repeated
Tb927.1.90	retrotransposon hot spot protein (RHS, pseudogene), putative	0.5883	0.4009	1.2118	0.67	0.76	0.43	145	repeated

## Sheet: 4. DeSeq2 CDS unique genes
GeneID	Annotation	Category	Order number	Orientation on chromosome	TranscriptLength	baseMean	Bloodstream WC CDS log2FoldChange	Bloodstream WC CDS padj	Procyclic WC CDS log2FoldChange	Procyclic WC CDS padj	log2FoldChange procyclic published value	BH corrected p-value procyclic published value	Bloodstream lowest bound/unbound	Bloodstream log2 average bound/unbound	BS down 1.5x	BS up 1.5x	PC down 1.5x	PC up 1.5x	Fadda bloodstream / procyclic	Naguleswaran stumpy /long slender	Silvester Stumpy /long slender	Christiano metacyclic / procyclic	Bloodstream WC CDS/UTR	Bloodstream WC CDS/UTR
Tb927.11.3040	hypothetical protein	ZUnknown	Tb927.11.03040	-	NA	246	0.5357	0.000168	0.299	1	0.0173	0.999	4.43	4.5445	0	0	0	0	0.5527	-0.147	-0.092	-0.7829	1.25	0.3219
Tb927.4.390	hypothetical protein, conserved	ZUnknown	Tb927.04.0390	-	616	256	-0.2074	0.232	-0.7252	0.0815854	-0.8909	0.00051	4.69	4.2745	0	0	0	0	0.5786	0.0402	0.73	-0.7872	1.33	0.4114
Tb927.10.12750	hypothetical protein	ZUnknown	Tb927.10.12750	-	NA	316	0.4237	0.237	1.6902	1.02937e-05	2.1807	6.9e-07	8.79	3.9424	0	0	0	1	#N/A	#N/A	0.587	-0.034	1.74	0.7991
Tb927.11.15200	hypothetical protein, conserved	ZUnknown	Tb927.11.15200	-	NA	262	-0.1339	0.463	0.1954	1	0.2672	0.599	3.08	3.6214	0	0	0	0	1.9187	-0.3847	-0.159	0.2221	1.03	0.0426
Tb927.11.16520	hypothetical protein, conserved	ZUnknown	Tb927.11.16520	-	NA	512	0.1387	0.213	-0.0242	1	-0.0882	0.999	4.62	3.5697	0	0	0	0	0.6865	-0.3905	0.221	0.2767	1.01	0.0144
Tb927.9.1520	hypothetical protein, conserved, no clear yeast or human matches	ZUnknown	Tb927.09.01520	-	NA	921	-0.2596	0.00894	-0.1338	1	-0.1259	0.999	3.55	3.4551	0	0	0	0	-1.7049	-0.3568	0.704	-2.2025	0.94	-0.0893
Tb927.9.7470	purine nucleoside transporter NT10	Nucleotides	Tb927.09.07470	-	NA	1059	-0.3989	6.65e-06	-1.189	0.00017514	-1.2015	8.08e-05	2.34	3.2193	0	0	1	0	-3.482	0.8525	1.52	-3.3675	1.02	0.0286
Tb927.5.3720	hypothetical protein, conserved	ZUnknown	Tb927.05.3720	+	673	379	1.0901	6.61e-22	1.1511	3.96147e-09	1.0126	2.44e-07	1.83	3.2058	0	1	0	1	-0.3908	-0.1271	1.809	-0.4123	1.48	0.5656
Tb927.10.6200	hypothetical protein, conserved, no clear yeast or human matches	Mito.pathway	Tb927.10.06200	-	740	179	0.3124	0.109	-0.1944	1	-0.1967	0.999	2.45	3.1885	0	0	0	0	-3.6148	-0.6505	1.604	-2.0634	1.07	0.0976
Tb927.1.3550	hypothetical protein	ZUnknown	Tb927.01.3550	-	1092	1310	0.8091	3.99e-31	2.7925	7.31343e-20	1.6144	4.58e-09	2.06	3.1587	0	1	0	1	0.4521	0.4978	-0.71	1.6737	1.04	0.0566
Tb927.8.3270	hypothetical protein	ZUnknown	Tb927.08.3270	+	1136	601	0.1957	0.065	0.1755	1	0.2075	0.936	2.2	3.1516	0	0	0	0	-0.4367	-0.3045	0.154	-0.3703	0.92	-0.1203
Tb927.8.6630	hypothetical protein	Mito.pathway	Tb927.08.6630	-	2609	1020	0.4224	2.29e-08	0.5861	0.47861	0.5802	0.306	2.59	3.1049	0	0	0	0	0.8419	0.2295	0.145	0.4986	1.12	0.1635
Tb927.10.10270	hypothetical protein, no non-kinetoplastid matches, no domains	ZUnknown	#N/A	#N/A	2335	78	0.7896	0.00156	1.7847	4.21461e-06	1.4802	1.07e-13	2.33	3.1021	0	1	0	1	#N/A	0.8191	-0.277	-0.8813	0.62	-0.6897
Tb927.8.5350	hypothetical protein, conserved	ZUnknown	Tb927.08.5350	-	513	105	-0.2117	0.368	0.3996	1	0.5381	0.567	3.75	3.0761	0	0	0	0	0.208	1.1758	1.434	0.5278	1.2	0.263
Tb927.8.6570	hypothetical protein, conserved	ZUnknown	Tb927.08.6570	-	1743	277	0.4131	0.00243	0.6996	0.116261	0.6814	0.0665	2.88	3.0514	0	0	0	0	-0.9217	-0.3096	0.808	0.7649	0.99	-0.0145
Tb927.5.460	hypothetical protein, conserved, poly(N)	ZUnknown	Tb927.05.0460	-	1588	218	-0.167	0.428	-0.4312	0.73715	-0.4729	0.437	2.41	3.0368	0	0	0	0	0.3027	-0.1273	0.987	-0.3594	0.9	-0.152
Tb927.1.1770	glutaredoxin GRX2	Redox	Tb927.01.1770	+	324	499	-0.2138	0.0896	-0.3443	0.338961	-0.3366	0.481	2.99	3.0167	0	0	0	0	-1.388	-0.0528	-0.13	-0.4197	1.13	0.1763
Tb927.10.8920	TbGRP ras-like small GTPase	Signalling	Tb927.10.08920	+	1750	2151	-0.0809	0.272	-0.1029	1	-0.1604	0.87	2.95	3.0042	0	0	0	0	-0.2854	0.0688	0.578	-0.5921	1.05	0.0704
Tb927.8.5150	hypothetical protein, conserved	ZUnknown	Tb927.08.5150	+	430	384	-0.4283	0.000269	-0.5122	0.352426	-0.5529	0.0682	2.31	2.9831	0	0	0	0	-1.4302	0.1296	0.452	-1.2639	1	0
Tb927.11.12730	hypothetical protein	ZUnknown	Tb927.11.12730	-	NA	697	-0.9499	2.15e-28	-0.3612	0.614116	-0.2875	0.183	2.67	2.9776	1	0	0	0	0.7148	-0.1045	0.532	1.2295	0.95	-0.074
Tb927.7.5780	thioredoxin, putative	ZUnknown	Tb927.07.5780	+	1286	234	-0.0043	0.983	-0.1262	1	-0.1267	0.999	3	2.977	0	0	0	0	-0.1137	0.3387	1.332	0.2116	1.22	0.2869
Tb927.3.2990	hypothetical protein, conserved	ZUnknown	Tb927.03.2990	-	920	461	0.0532	0.692	0.0271	1	0.028	0.999	2.21	2.9037	0	0	0	0	-0.9674	-0.1977	0.046	-0.3866	0.95	-0.074
Tb927.3.3680	hypothetical protein, conserved	Mito.pathway	Tb927.03.3680	+	973	449	0.1118	0.367	0.0483	1	0.0815	0.999	2.96	2.8862	0	0	0	0	0.5117	0.0726	0.566	-0.3057	1	0
Tb927.2.2140	hypothetical protein, conserved	ZUnknown	Tb927.02.2140	-	738	128	-0.0791	0.741	-0.7361	0.168185	-0.7516	0.099	2.03	2.883	0	0	0	0	-0.9766	-0.0293	1.488	-1.486	1.03	0.0426
Tb927.6.2030	protein kinase, putative	Protein.kinase	Tb927.06.2030	-	5939	2666	-0.1597	0.00985	3.4297	1.94469e-13	2.1051	2.43e-07	1.61	2.8797	0	0	0	1	-0.7608	0.508	0.17	0.7038	1.15	0.2016
Tb927.8.7710	hypothetical protein, conserved	ZUnknown	Tb927.08.7710	+	2291	473	0.3609	0.00168	0.0506	1	-0.1213	0.98	2.09	2.8791	0	0	0	0	1.0418	0.071	-0.133	-0.5789	0.97	-0.0439
Tb927.9.4550	hypothetical protein, conserved	ZUnknown	Tb927.09.04550	+	NA	219	0.3838	0.0191	-0.0433	1	-0.0326	0.999	2.88	2.86	0	0	0	0	-0.8671	-0.1201	0.894	-0.9827	1.14	0.189
Tb927.5.4370	hypothetical protein, conserved	ZUnknown	Tb927.05.4370	-	377	465	0.4338	3.65e-05	0.3515	0.75888	0.3861	0.531	2.8	2.8533	0	0	0	0	-0.3599	-0.1841	0.314	0.0376	0.97	-0.0439
Tb927.9.13200	hypothetical protein	ZUnknown	Tb927.09.13200	-	NA	476	0.6422	5.24e-07	-0.8834	0.0584813	-0.8922	0.00426	2.18	2.8473	0	1	0	0	-3.4345	-0.3974	0.83	-1.9438	2.27	1.1827
Tb927.3.2880	Mitochondrial ATP synthase subunit, putative	Mito.pathway	Tb927.03.2880	-	1152	474	0.3783	0.00608	-0.447	0.00826855	-0.4719	0.000638	3.1	2.819	0	0	0	0	-1.159	-0.1316	0.438	-1.4526	1.1	0.1375
Tb927.10.5550	hypothetical protein, conserved	ZUnknown	Tb927.10.05550	+	768	655	0.086	0.439	-0.0488	1	-0.0773	0.999	2.42	2.8115	0	0	0	0	-0.3861	-0.1252	0.424	-0.3851	0.95	-0.074
Tb927.7.5680	deoxyribose-phosphate aldolase, putative	Enzyme	Tb927.07.5680	+	2171	598	-0.0766	0.473	0.0099	1	0.0081	0.999	2.77	2.8094	0	0	0	0	-1.5714	0.1207	0.557	-1.5141	1.07	0.0976
Tb927.5.2360	hypothetical protein, conserved	ZUnknown	Tb927.05.2360	+	5579	1707	0.7974	1.7e-42	1.5101	0.00691752	1.2964	0.00443	1.63	2.752	0	1	0	1	1.1682	1.2404	0.461	1.1272	1.12	0.1635
Tb927.11.15010	NEK21 protein kinase	Protein.kinase	Tb927.11.15010	-	NA	1629	1.1969	1.86e-70	1.4473	0.00228091	0.8652	0.00425	2.24	2.7485	0	1	0	1	-0.8387	0.8546	0.93	-1.3016	1.57	0.6508
Tb927.9.15870	hypothetical protein	ZUnknown	Tb927.09.15870	-	NA	1304	-0.2662	0.000271	-0.119	1	-0.06	0.999	4.7	2.7463	0	0	0	0	2.0181	1.0145	0.115	1.8651	0.86	-0.2176
Tb927.10.9300	adiponectin receptor protein 1	ZUnknown	Tb927.10.09300	+	954	1405	0.3031	5.84e-06	0.3481	0.681985	0.3397	0.452	1.86	2.7108	0	0	0	0	0.592	-0.0341	-0.363	-0.1277	0.96	-0.0589
Tb927.10.9320	hypothetical protein, conserved	ZUnknown	Tb927.10.09320	+	1202	398	0.6906	1.42e-09	0.2983	0.998448	0.327	0.846	2.99	2.7071	0	1	0	0	0.4474	-0.0348	0.235	0.8386	1.28	0.3561
Tb927.8.5060	ARL6, vesicle-associated, needed for full-length flagellum	Vesicular.transport	Tb927.08.5060	+	700	587	0.2348	0.017	0.3083	0.786069	0.3081	0.465	3.19	2.7056	0	0	0	0	0.1658	0.1378	-0.086	0.0411	1.04	0.0566
Tb927.3.750	SET12	Mito.pathway	Tb927.03.0750	-	1553	925	0.3387	0.000263	-0.1558	1	-0.1925	0.387	2.66	2.7049	0	0	0	0	-1.0579	0.1374	0.537	-0.8316	1.14	0.189
Tb927.8.6650	DRBD13	RNA.binding	Tb927.08.6650	-	5067	1738	1.0836	1.85e-61	2.8505	6.79791e-19	1.9118	0.00017	2.56	2.663	0	1	0	1	1.1353	0.5536	-0.586	-1.5128	1.39	0.4751
Tb927.8.8320	hypothetical protein, conserved	ZUnknown	Tb927.08.8320	+	4319	643	-0.8545	2.75e-20	1.3539	0.129137	1.2018	0.00118	1.82	2.6523	1	0	0	0	0.6645	1.1004	0.583	1.7087	0.63	-0.6666
Tb927.10.5150	ZC3H31	RNA.binding	Tb927.10.05150	+	2356	2279	0.6314	2.11e-29	4.9529	1.85878e-37	4.4281	1.89e-32	1.83	2.6485	0	1	0	1	0.098	0.126	-0.335	1.51	1.02	0.0286
Tb927.6.1710	hypothetical protein, conserved	ZUnknown	Tb927.06.1710	-	1792	317	0.2064	0.132	0.4245	0.744784	0.3769	0.484	3.12	2.6446	0	0	0	0	-0.4653	0.1537	0.059	-0.1036	1.06	0.0841
Tb927.5.1040	hypothetical protein	ZUnknown	Tb927.05.1040	+	728	320	-0.1365	0.345	0.0425	1	0.0807	0.999	2.89	2.6392	0	0	0	0	0.2915	-0.0565	0.316	-0.0036	1.15	0.2016
Tb927.10.3680	hypothetical protein, conserved	ZUnknown	Tb927.10.03680	-	3032	1267	0.1145	0.185	1.8562	4.88443e-16	1.8159	4.09e-13	1.71	2.633	0	0	0	1	-0.0452	0.5822	-0.079	1.2567	1.29	0.3674
Tb927.10.6770	BRCA1 C Terminus (BRCT) domain containing protein, putative	ZUnknown	Tb927.10.06770	+	1397	273	-0.1741	0.218	0.3588	0.918341	0.397	0.779	1.6	2.6292	0	0	0	0	-0.5554	-0.0739	-0.166	0.0462	0.99	-0.0145
Tb927.4.1040	hypothetical protein, conserved	ZUnknown	Tb927.04.1040	-	995	590	0.1244	0.233	0.2758	0.818527	0.2774	0.779	2.82	2.626	0	0	0	0	0.4425	-0.0862	-0.295	-0.0051	1.06	0.0841
Tb927.7.6710	hypothetical protein	ZUnknown	Tb927.07.6710	-	1676	676	0.1715	0.207	0.6849	0.0563667	0.9313	0.000318	2.33	2.6167	0	0	0	0	0.6247	-0.1796	0.148	0.0778	2.93	1.5509
Tb927.4.3340	hypothetical protein, conserved, in MCM-BP-TAP	ZUnknown	Tb927.04.3340	-	1878	564	0.8291	1.42e-19	0.8136	0.0139136	0.7616	4.79e-05	2.14	2.6104	0	1	0	1	0.9351	0.7022	0.342	0.2658	1.03	0.0426
Tb927.10.3600	hypothetical protein, conserved	ZUnknown	Tb927.10.03600	+	2640	963	0.592	9.58e-13	1.2516	0.0870031	1.2496	0.0284	2.31	2.5969	0	1	0	0	1.2202	0.4039	-0.37	1.1451	1.02	0.0286
Tb927.11.4870	hypothetical protein, conserved, no clear yeast or human matches, domain of unknown funciton	Mito.pathway	Tb927.11.04870	+	NA	557	0.5562	2.47e-08	-0.1937	0.957536	-0.2185	0.794	1.96	2.589	0	0	0	0	-2.0258	0.3914	0.49	-1.2263	1.06	0.0841
Tb927.6.4050	ZC3H14	RNA.binding	Tb927.06.4050	-	2232	371	-0.0533	0.706	-0.2168	1	-0.2157	0.999	3.13	2.5858	0	0	0	0	0.7418	0.4899	0.184	-0.0548	0.89	-0.1681
Tb927.7.2600	class I transcription factor A, subunit 7 (CITFA-7)	RNA.synthesis	Tb927.07.2600	-	1468	647	-0.2687	0.00368	-0.3727	0.584073	-0.4121	0.0159	3.56	2.5842	0	0	0	0	-0.4654	-0.1513	0.431	-0.343	1.02	0.0286
Tb927.2.4480	hypothetical protein, conserved	ZUnknown	Tb927.02.4480	-	2853	1283	0.0758	0.35	-0.0985	1	-0.06	0.999	3.03	2.5818	0	0	0	0	0.4729	-0.6271	-0.26	-0.2713	0.96	-0.0589
Tb927.6.5020	CYC7, CYC2-like cyclin	Cell.cycle	Tb927.06.5020	+	1135	479	1.1953	3.34e-24	0.4841	0.89273	0.4224	0.87	1.9	2.5785	0	1	0	0	-0.4335	0.4376	1.163	0.1753	1.15	0.2016
Tb927.10.400	hypothetical protein, conserved	ZUnknown	Tb927.10.00400	+	1534	305	-0.4602	0.000476	-0.5206	0.422069	-0.5343	0.264	2.97	2.5761	0	0	0	0	-0.3616	0.0446	0.392	0.4639	1.04	0.0566
Tb927.11.1280	hypothetical protein, conserved, no clear yeast or human matches	ZUnknown	Tb927.11.01280	+	NA	834	-0.8141	2.46e-24	0.6943	0.487861	0.6596	0.427	1.81	2.5729	1	0	0	0	1.5233	0.0809	1.069	1.2928	0.94	-0.0893
Tb927.7.6300	WD domain, G-beta repeat, putative	ZUnknown	Tb927.07.6300	-	4856	753	0.9991	5.61e-32	2.6891	4.22502e-24	2.6124	2.53e-28	1.54	2.5575	0	1	0	1	-0.738	0.376	0.818	-0.3646	1.15	0.2016
Tb927.11.530	RBP3	RNA.binding	Tb927.11.00530	-	NA	1908	-0.3889	9.64e-11	3.3287	7.53897e-16	2.5719	2.07e-10	1.55	2.5517	0	0	0	1	-0.0837	0.2419	-0.944	1.2696	0.97	-0.0439
Tb927.6.4030	superoxide dismutase, putative	Redox	Tb927.06.4030	-	856	907	-0.283	0.000429	-0.3568	0.257844	-0.3751	0.0216	2.49	2.5451	0	0	0	0	-1.3407	-0.2152	-0.324	-0.918	0.99	-0.0145
Tb927.4.1000	hypothetical protein, conserved	ZUnknown	Tb927.04.1000	-	4231	1384	0.521	5.86e-12	0.9261	0.000947176	0.7206	0.00371	1.19	2.5435	0	0	0	1	0.3369	0.9804	0.604	-0.0402	1.36	0.4436
Tb927.10.10250	EP2 procyclin	Membrane.protein	Tb927.10.10250	-	721	655	-0.2057	0.0379	-0.4075	0.862778	0.1738	0.875	1.48	2.5385	0	0	0	0	-5.1958	-0.4387	3.076	-3.2867	0.84	-0.2515
Tb927.1.4490	Histone acetyltransferase HAT6	Lipids	Tb927.01.4490	+	3001	1312	-0.3145	3.65e-05	1.5856	0.2038	1.1703	0.031	1.62	2.5269	0	0	0	0	1.927	0.0422	0.311	-0.6646	1.45	0.5361
Tb927.9.9370	PSP1 C-terminal conserved region, putative	ZUnknown	Tb927.09.09370	-	NA	772	0.8999	5.4e-27	3.2891	2.2925e-33	1.7456	3.65e-09	1.46	2.5236	0	1	0	1	-0.309	0.3114	-0.299	-1.0758	1.68	0.7485
Tb927.10.14270	TFIIF-stimulated CTD phosphatase, putative	Protein.phosphatase	Tb927.10.14270	-	6384	2615	1.1883	4.87e-113	2.7678	4.91681e-18	2.6539	2.17e-12	1.9	2.5219	0	1	0	1	0.9783	0.1865	-0.671	0.9787	0.98	-0.0291
Tb927.1.1470	conserved protein, unknown function	ZUnknown	Tb927.01.1470	+	1758	1138	0.4621	8.51e-10	1.822	0.000898258	2.0644	4.89e-06	1.64	2.5152	0	0	0	1	-1.342	0.8781	0.365	-1.1788	1.35	0.433
Tb927.9.5650	E2-like ubiquitin-conjugation enzyme, putative	Ubiquitin.proteasome	Tb927.09.05650	+	NA	1137	-0.006	0.957	-0.1033	1	-0.1027	0.999	2.09	2.5143	0	0	0	0	-0.4624	0.0064	0.008	-0.1234	1.08	0.111
Tb927.7.5380	DRBD12	RNA.binding	Tb927.07.5380	+	2468	2004	1.4159	4.39e-122	4.9394	4.54791e-89	4.6104	1.56e-62	2.71	2.5143	0	1	0	1	1.2246	0.3837	0.46	0.8187	0.9	-0.152
Tb927.5.2350	glycosyltransferase (GlcNAc), putative	Glycans	Tb927.05.2350	+	2592	1142	-0.5635	7.06e-13	0.5606	0.691326	0.5793	0.189	2.25	2.5076	0	0	0	0	1.2055	0.484	-0.243	0.4235	1.09	0.1243
Tb927.11.8340	hypothetical protein	ZUnknown	Tb927.11.08340	+	NA	402	0.1325	0.44	1.0294	0.290219	1.5614	2.29e-05	3.13	2.5067	0	0	0	0	1.1411	-0.2259	-0.594	3.0201	0.89	-0.1681
Tb927.4.2160	hypothetical protein, conserved	ZUnknown	Tb927.04.2160	+	1152	352	0.1863	0.153	0.2055	1	0.1602	0.999	3.22	2.4914	0	0	0	0	-0.8072	0.0148	0.391	-0.0402	1.08	0.111
Tb927.1.2150	calpain-like protein fragment, putative,calpain-like cysteine peptidase, Clan CA, family C2	Protease	Tb927.01.2150	+	2333	196	-0.6539	6.93e-05	-0.1623	1	-0.0115	0.999	3.03	2.4863	1	0	0	0	0.6678	0.373	0.097	1.7679	1.2	0.263
Tb927.3.2940	hypothetical protein, conserved, no clear yeast or human matches	ZUnknown	Tb927.03.2940	-	1182	410	-0.15	0.237	-0.0031	1	-0.0539	0.999	2.47	2.4708	0	0	0	0	0.507	0.0334	0.607	0.2976	0.98	-0.0291
Tb927.11.2160	hypothetical protein, conserved	ZUnknown	Tb927.11.02160	+	NA	630	0.5215	2.66e-08	0.0292	1	0.0218	0.999	2.99	2.4681	0	0	0	0	-0.708	0.1444	0.798	-0.5909	1.03	0.0426
Tb927.6.3240	BILBO2	Cytoskeleton	Tb927.06.3240	+	1071	1523	-0.2434	0.000151	-0.3276	1	-0.3639	0.792	3.58	2.4673	0	0	0	0	0.3637	0.6173	0.318	0.2667	1.09	0.1243
Tb927.10.4960	hypothetical protein	ZUnknown	Tb927.10.04960	-	713	55	-0.1968	0.558	-0.306	1	-0.3512	0.926	2.38	2.4507	0	0	0	0	-0.7733	-0.031	0.468	0.971	1.01	0.0144
Tb927.11.1570	hypothetical protein, conserved no matches	ZUnknown	Tb927.11.01570	-	NA	1249	0.3302	1.78e-06	0.1968	1	0.197	0.965	2.63	2.4489	0	0	0	0	-1.1282	0.3822	0.607	-1.1073	1.26	0.3334
Tb927.11.5080	hypothetical protein, conserved	ZUnknown	Tb927.11.05080	+	NA	1164	0.4459	2.86e-10	0.89	0.0456099	0.9564	0.000503	1.59	2.448	0	0	0	1	2.1146	-0.0117	0.373	2.3572	1.24	0.3103
Tb927.10.13400	Phosphatidic acid phostphatase, putative	Lipids	Tb927.10.13400	-	2018	841	0.6119	6.47e-13	0.546	0.371009	0.4781	0.337	2.7	2.4365	0	1	0	0	#N/A	0.0593	0.715	0.8641	1.06	0.0841
Tb927.5.4020	hypothetical protein no clear yeast or human matches	ZUnknown	Tb927.05.4020	-	872	397	1.0371	1.27e-20	-1.034	0.0241796	-1.0393	0.00596	1.88	2.4078	0	1	1	0	-1.2746	0.8014	2.016	-2.5448	0.78	-0.3585
Tb927.10.12780	ZC3H37	RNA.binding	Tb927.10.12780	-	951	4575	1.1084	8.44e-83	2.5541	1.52036e-08	1.9392	5.5e-06	1.8	2.4042	0	1	0	1	-2.3952	0.4359	0.393	0.409	1.1	0.1375
Tb927.1.4540	cyclin-like F-box protein (CFB1A)	Ubiquitin.proteasome	Tb927.01.4540	+	1716	10358	0.4727	3.15e-25	0.8138	0.565111	0.6859	0.0191	2.02	2.4014	0	0	0	0	#N/A	0.2071	-0.428	1.0307	0.92	-0.1203
Tb927.11.480	small GTP-binding protein domain containing protein, putative	ZUnknown	Tb927.11.00480	-	NA	1415	-0.146	0.0356	-0.1795	1	-0.1674	0.932	1.94	2.3996	0	0	0	0	-0.1502	0.0235	0.803	-0.2508	0.94	-0.0893
Tb927.3.1700	DAG acyltransferase	Lipids	Tb927.03.1700	-	1551	935	-0.0865	0.331	-0.3603	0.441683	-0.3761	0.253	2.02	2.3987	0	0	0	0	1.2096	0.3568	0.828	1.045	1.13	0.1763
Tb927.7.6400	hypothetical protein, conserved	ZUnknown	Tb927.07.6400	-	515	984	-0.3824	8.74e-07	-0.1966	0.99122	-0.2035	0.999	1.64	2.3969	0	0	0	0	0.2841	-0.1959	-0.118	0.5941	0.99	-0.0145
Tb927.11.1920	hypothetical protein	ZUnknown	Tb927.11.01920	-	NA	98	-0.5129	0.0245	-0.5383	0.895298	-0.0366	0.999	3.2	2.3905	0	0	0	0	-1.0241	0.2142	0.854	0.9801	0.82	-0.2863
Tb927.7.1810	hypothetical protein, conserved	ZUnknown	Tb927.07.1810	+	1597	3391	1.871	1.07e-142	1.5918	1.32743e-05	1.377	6.63e-07	2.06	2.3877	0	1	0	1	-0.1438	-0.0554	0.756	1.7201	1.96	0.9709
Tb927.3.2920	hypothetical protein, conserved	ZUnknown	Tb927.03.2920	-	1140	470	0.3038	0.00573	0.3693	0.807173	0.4138	0.709	1.89	2.3877	0	0	0	0	0.3771	0.2274	-0.083	0.7412	0.95	-0.074
Tb927.11.10530	hypothetical protein, conserved	ZUnknown	Tb927.11.10530	+	NA	291	0.3233	0.013	0.3412	0.254539	0.2879	0.416	2.26	2.3868	0	0	0	0	-0.924	0.1308	0.254	0.3886	1.24	0.3103
Tb927.10.2850	hypothetical protein	ZUnknown	Tb927.10.02850	+	1306	1073	-0.1095	0.172	0.2105	1	0.1855	0.939	2.14	2.3794	0	0	0	0	0.4013	0.4283	-0.343	1.0575	1.1	0.1375
Tb927.9.5020	HMG-box domain containing protein, putative	ZUnknown	Tb927.09.05020	+	NA	1070	0.3295	0.00011	0.2589	0.492981	0.2566	0.376	2.76	2.3794	0	0	0	0	0.5453	-0.1417	-0.245	-0.1975	0.97	-0.0439
Tb927.10.8050	TFIIF-stimulated CTD phosphatase, putative	Protein.phosphatase	Tb927.10.08050	-	4178	876	1.3002	1.81e-59	2.2038	5.28554e-23	1.7701	2.15e-08	1.93	2.373	0	1	0	1	-1.6914	1.4172	0.424	-0.8491	1.41	0.4957
Tb927.3.2370	hypothetical protein, conserved	Mito.pathway	Tb927.03.2370	+	784	476	0.345	0.00141	-0.0259	1	-0.067	0.999	1.62	2.373	0	0	0	0	-1.5721	0.4428	0.349	-0.2565	1	0
Tb927.3.2910	hypothetical protein, conserved	ZUnknown	Tb927.03.2910	-	424	443	-0.0551	0.702	0.2064	1	0.1808	0.975	2.61	2.372	0	0	0	0	-0.1211	-0.0208	-0.133	0.2513	1.01	0.0144
Tb927.6.2870	hypothetical protein, conserved	ZUnknown	Tb927.06.2870	+	1729	682	0.0689	0.573	0.3404	1	0.3029	0.999	1.29	2.372	0	0	0	0	0.0004	0.0947	0.483	0.6511	0.87	-0.2009
Tb927.8.5870	hypothetical protein, conserved	ZUnknown	Tb927.08.5870	+	375	599	0.5577	1.28e-09	0.4049	0.665207	0.4042	0.145	2.63	2.3655	0	0	0	0	0.7478	0.4387	0.212	1.0342	1.15	0.2016
Tb927.3.3960	DRBD6A	RNA.binding	Tb927.03.3960	+	3823	1864	1.0878	7.19e-67	2.3917	1.67745e-11	2.1627	3.28e-12	1.64	2.3646	0	1	0	1	0.5177	0.4842	-0.206	0.8546	1.3	0.3785
Tb927.5.2480	hypothetical protein, conserved	ZUnknown	Tb927.05.2480	+	4905	1124	0.3641	2.08e-06	2.2785	2.34521e-06	2.2764	1.38e-06	2.37	2.3552	0	0	0	1	1.8498	0.27	0.367	2.4664	0.96	-0.0589
Tb927.10.4750	hypothetical protein, conserved	ZUnknown	Tb927.10.04750	-	3319	2287	0.2308	4.74e-05	-0.0431	1	-0.1831	0.934	2.6	2.3505	0	0	0	0	-0.1156	0.9464	0.306	-0.3156	1.4	0.4854
Tb927.11.8470	ZC3H45	RNA.binding	Tb927.11.08470	+	NA	578	0.728	3.29e-13	3.6449	1.98802e-15	2.9414	3.12e-11	1.88	2.3401	0	1	0	1	0.3561	0.5073	-0.435	3.1717	1.24	0.3103
Tb927.6.4060	Eukaryotic protein of unknown function (DUF872), putative	ZUnknown	Tb927.06.4060	-	1011	574	-0.3761	5.7e-05	-0.118	1	-0.2132	0.376	1.73	2.3277	0	0	0	0	-0.4581	-0.4516	0.134	1.0594	1.04	0.0566
Tb927.9.11820	CRAL/TRIO domain containing protein, putative	ZUnknown	Tb927.09.11820	+	NA	638	0.9877	1.26e-22	-0.1073	1	-0.2436	0.718	2.59	2.3267	0	1	0	0	-1.9147	0.8657	0.781	-1.2672	1.77	0.8237
Tb927.10.3040	SDH9 succinate dehydrogenase (complex II) subunit	Mito.e.transport	Tb927.10.03040	+	967	834	0.3892	2.13e-06	0.4756	0.244791	0.4616	0.355	1.75	2.3229	0	0	0	0	-1.0783	-0.1512	-0.65	-1.4104	0.99	-0.0145
Tb927.10.1000	hypothetical protein	ZUnknown	Tb927.10.01000	+	801	413	0.4851	2.94e-05	-0.6924	0.321576	-0.7507	0.232	2.48	2.3074	0	0	0	0	-0.6598	0.6517	0.398	-2.2077	0.85	-0.2345
Tb927.8.4620	small GTP-binding protein Rab7, putative	Vesicular.transport	Tb927.08.4620	-	944	714	-0.0353	0.766	-0.0478	1	-0.0802	0.999	3.02	2.2947	0	0	0	0	0.1404	0.4116	0.547	0.2932	1.21	0.275
Tb927.10.410	hypothetical protein, conserved	ZUnknown	Tb927.10.00410	+	1586	1492	0.1786	0.0133	0.3346	0.857829	0.3901	0.518	2.13	2.2908	0	0	0	0	0.4229	0.3206	-0.051	1.0937	1.24	0.3103
Tb927.5.3130	hypothetical protein	ZUnknown	Tb927.05.3130	-	3683	678	0.7937	7.53e-21	0.3274	0.936074	0.2518	0.999	2.08	2.2839	0	1	0	0	0.3214	0.7378	0.142	-0.8945	1.36	0.4436
Tb927.9.8490	hypothetical protein, conserved	ZUnknown	Tb927.09.08490	-	NA	777	0.2166	0.0194	0.0525	1	-0.0059	0.999	1.89	2.281	0	0	0	0	-0.9642	0.1206	-0.027	-0.0618	1.2	0.263
Tb927.8.3400	palmitoyl acyltransferase 12, putative	Lipids	Tb927.08.3400	+	1946	322	-0.4781	0.0001	-0.4918	0.0601205	-0.3323	0.0723	2.32	2.256	0	0	0	0	-0.9643	0.1653	0.286	-0.7678	0.95	-0.074
Tb927.6.3880	hypothetical protein, conserved	ZUnknown	Tb927.06.3880	-	3404	1104	-0.2738	0.00125	0.1035	1	0.2318	0.999	2.36	2.2469	0	0	0	0	-1.3328	1.0446	0.394	0.4668	0.94	-0.0893
Tb927.10.9080	pteridine transporter, putative	Transporter	Tb927.10.09080	+	3434	7245	0.7556	5.36e-52	-0.1049	1	-0.0948	0.999	0.8	2.2449	0	1	0	0	-2.9442	0.7438	0.603	-2.2958	0.99	-0.0145
Tb927.6.510	GPEET2 procyclin	Membrane.protein	Tb927.06.0510	+	675	492	-0.6168	4.54e-07	-0.2282	1	0.5937	0.0844	1.5	2.2439	1	0	0	0	-7.7533	-0.025	3.694	-1.6297	0.92	-0.1203
Tb927.3.5210	hypothetical protein, conserved	ZUnknown	Tb927.03.5210	+	2391	640	0.4124	5.5e-06	1.257	0.00848032	1.1242	0.0474	1.77	2.2408	0	0	0	1	-0.1352	0.6482	0.659	1.5248	1.48	0.5656
Tb927.10.15040	hypothetical protein, conserved	ZUnknown	Tb927.10.15040	+	1569	1412	0.1931	0.00451	2.9669	1.53177e-20	1.2012	1.52e-05	2.05	2.2388	0	0	0	1	1.6477	0.5916	-0.309	#N/A	1.23	0.2987
Tb927.8.6340	CYC10, CYC2-like cyclin	Cell.cycle	Tb927.08.6340	+	5182	1196	0.5105	3.13e-11	2.6638	1.04878e-09	1.7592	2.56e-05	1.48	2.2367	0	0	0	1	-0.2756	1.2423	0.178	0.9128	1.61	0.6871
Tb927.11.16360	hypothetical protein, conserved	ZUnknown	Tb927.11.16360	-	NA	1911	0.0388	0.605	1.8263	0.000226462	1.6875	0.000395	1.46	2.2327	0	0	0	1	1.1716	0.3862	0.108	1.5989	1.09	0.1243
Tb927.8.4200	hypothetical protein, conserved, no domains, no yeast.human match	ZUnknown	Tb927.08.4200	-	7477	2604	0.4915	1.69e-16	3.6232	1.17364e-38	2.7086	1.9e-18	1.16	2.2286	0	0	0	1	0.8686	-0.3548	-0.273	2.3336	1.43	0.516
Tb927.11.3080	vesicular protein trafficking mediator, putative	Vesicular.transport	Tb927.11.03080	-	NA	1259	0.8198	3.02e-29	0.0188	1	-0.0028	0.999	2.28	2.2286	0	1	0	0	-1.7617	0.0244	0.794	-1.3229	1.12	0.1635
Tb927.11.10920	hypothetical protein, conserved	ZUnknown	Tb927.11.10920	+	NA	907	-0.2139	0.0084	-0.3271	0.914162	-0.3634	0.419	3.03	2.2224	0	0	0	0	0.4456	0.7272	0.35	-1.1601	1.29	0.3674
Tb927.3.3160	PAP1 poly(A) polymerase. Cis-spliced. cytosolic	RNA.processing	Tb927.03.3160	-	2063	1098	-0.1656	0.0261	0.0487	1	0.0137	0.999	2.38	2.2203	0	0	0	0	0.1133	-0.1003	0.28	0.2973	0.94	-0.0893
Tb927.11.14750	PSP1 C-terminal conserved region, putative	ZUnknown	Tb927.11.14750	-	NA	3252	0.1534	0.0125	0.8403	0.048944	0.8445	0.0461	2.21	2.2172	0	0	0	1	-0.1297	0.0909	-0.134	-1.3184	0.95	-0.074
Tb927.8.4300	hypothetical protein	ZUnknown	#N/A	#N/A	1775	973	1.8385	1.58e-85	3.0142	1.12476e-11	2.2791	2.21e-06	1.28	2.21	0	1	0	1	0.9595	-0.2369	0.555	0.7878	5.63	2.4931
Tb927.7.690	zinc finger protein, putative	Zinc.finger	Tb927.07.0690	-	4868	1384	0.4795	1.09e-10	1.0572	0.000462533	1.057	0.000142	2.43	2.2079	0	0	0	1	1.419	0.8347	-0.274	0.9647	1.3	0.3785
Tb927.4.1830	Urm1 (Ubiquitin related modifier), putative	ZUnknown	Tb927.04.1830	-	651	529	0.2384	0.0262	-0.1829	0.938779	-0.214	0.745	2.3	2.2037	0	0	0	0	-0.2875	-0.2435	0.851	-0.6147	0.94	-0.0893
Tb927.8.6890	hypothetical protein, conserved	ZUnknown	Tb927.08.6890	-	499	549	0.7642	1e-11	0.2021	0.984102	0.1745	0.983	1.08	2.1964	0	1	0	0	-0.2787	-0.1508	0.749	0.0169	1.02	0.0286
Tb927.7.2420	GSK3-long glycogen synthase kinase-3 alpha	Glycans	Tb927.07.2420	-	5584	2020	0.6782	4.48e-32	2.0072	6.06145e-08	2.1604	2.35e-13	1.87	2.1901	0	1	0	1	-0.1624	0.7948	0.132	1.8682	1.37	0.4542
Tb927.3.4930	hypothetical protein, conserved	ZUnknown	Tb927.03.4930	+	2016	503	-0.1891	0.131	-0.0995	1	-0.1324	0.999	1.79	2.1869	0	0	0	0	0.5163	-0.4437	0.532	-0.1979	1.73	0.7908
Tb927.11.16320	hypothetical protein, conserved	ZUnknown	Tb927.11.16320	-	NA	579	0.5553	8.53e-09	0.0066	1	-0.0645	0.999	1.85	2.1869	0	0	0	0	-0.98	0.1387	0.385	0.1012	1.03	0.0426
Tb927.5.1350	hypothetical protein, conserved	ZUnknown	Tb927.05.1350	+	1710	1048	0.0439	0.637	-0.083	1	-0.0171	0.999	1.98	2.1827	0	0	0	0	0.5296	-0.0332	0.2	-0.2162	1.01	0.0144
Tb927.6.220	purine nucleoside transporter NT9	Nucleotides	Tb927.06.0220	+	1392	676	1.195	2.8e-30	1.1159	0.0174451	0.1218	0.999	1.55	2.171	0	1	0	1	-0.3458	0.6161	-0.235	1.8944	1.54	0.6229
Tb927.1.4700	hypothetical protein, conserved	ZUnknown	Tb927.01.4700	+	1016	852	0.5074	1.31e-10	0.2065	0.934575	0.1973	0.6	2.22	2.1699	0	0	0	0	-0.8321	0.0981	0.65	0.2983	1.35	0.433
Tb927.9.10970	Bem46-like serine peptidase,Serine peptidase, Clan SC, Family S09X	Protease	Tb927.09.10970	-	NA	880	-0.1831	0.0263	0.1321	1	0.1386	0.866	1.54	2.1549	0	0	0	0	-0.2326	0.238	0.067	0.0608	1.03	0.0426
Tb927.5.3440	hypothetical protein, conserved	ZUnknown	Tb927.05.3440	-	1285	2484	1.9085	3.07e-136	1.7789	1.039e-13	1.9129	5.62e-07	1.17	2.1538	0	1	0	1	0.0832	0.1979	0.77	0.5084	1.7	0.7655
Tb927.5.3890	hypothetical protein, conserved	ZUnknown	Tb927.05.3890	+	2330	516	0.6154	4.32e-10	-0.1463	0.972215	-0.1618	0.887	2.27	2.1484	0	1	0	0	-0.8953	0.165	0.478	-0.867	1.18	0.2388
Tb927.5.650	GRESAG 4, putative receptor-type adenylate cyclase	GRESAG	Tb927.05.0650	#N/A	5801	1939	0.7082	1.13e-27	0.4755	0.761056	0.3612	0.324	0.93	2.1473	0	1	0	0	1.9227	0.4789	-0.329	0.6567	1.52	0.6041
Tb927.10.5100	hypothetical protein	ZUnknown	Tb927.10.05100	+	NA	606	-0.8661	1.28e-12	-0.3123	0.936074	0.0969	0.999	1.99	2.1451	1	0	0	0	#N/A	#N/A	0.527	-0.1451	1.07	0.0976
Tb927.8.5930	hypothetical protein	ZUnknown	Tb927.08.5930	+	3116	41	1.9938	4.87e-08	1.5978	0.0694032	1.2013	1.59e-07	2.2	2.1419	0	1	0	0	#N/A	0.4517	0.398	-1.9628	3.96	1.9855
Tb927.6.3140	Ubiquitin-like protein	Ubiquitin.proteasome	Tb927.06.3140	+	1387	396	0.2792	0.0145	-0.2213	0.905648	-0.2226	0.86	1.95	2.1408	0	0	0	0	-0.9359	-0.2279	-0.12	0.1439	1.17	0.2265
Tb927.6.4810	zinc-binding protein (Yippee), putative	Zinc.finger	Tb927.06.4810	+	1079	441	0.0647	0.603	0.0693	1	0.0987	0.999	3.14	2.1331	0	0	0	0	-0.9822	-0.1151	0.11	0.9355	1.08	0.111
Tb927.6.3830	hypothetical protein, conserved	ZUnknown	Tb927.06.3830	-	2111	548	-0.3548	0.000267	-0.3894	1	-0.4277	0.999	3.02	2.132	0	0	0	0	-0.8508	0.3689	0.484	-0.0101	0.99	-0.0145
Tb927.8.3570	Zinc finger, C3HC4 type (RING finger), putative	Zinc.finger	Tb927.08.3570	-	2171	1082	0.3735	2.49e-07	1.3742	0.00308944	1.3094	0.00649	1.93	2.1188	0	0	0	1	0.8116	0.564	-0.39	0.2134	1	0
Tb927.2.2550	hypothetical protein, conserved	ZUnknown	Tb927.02.2550	-	2044	776	0.0697	0.473	0.0875	1	0.0822	0.999	2.32	2.1144	0	0	0	0	1.1465	0.3684	-0.103	-0.0011	1.02	0.0286
Tb927.9.1360	hypothetical protein, conserved	ZUnknown	Tb927.09.01360	-	NA	1223	0.183	0.0355	-0.0765	1	-0.0815	0.999	1.72	2.1099	0	0	0	0	1.0077	-0.2214	0.001	0.7379	0.99	-0.0145
Tb927.4.780	Phosphatidylinositol N-acetylglucosaminyltransferase subunit Y, putative	ZUnknown	Tb927.04.0780	-	632	263	-0.3005	0.0598	-0.2347	1	-0.2452	0.982	1.93	2.1066	0	0	0	0	0.1371	-0.5018	0.417	0.3336	1.14	0.189
Tb927.9.9300	hypothetical protein, conserved	ZUnknown	Tb927.09.09300	-	NA	1304	-0.8311	6.09e-29	-1.1042	0.310745	-1.0976	0.0337	2.32	2.1066	1	0	0	0	-0.0958	1.3949	1.309	-0.6545	1.11	0.1506
Tb927.10.8740	hypothetical protein	ZUnknown	Tb927.10.08740	+	NA	543	0.7378	1.7e-14	0.7944	0.00569003	0.5287	0.101	1.28	2.1032	0	1	0	1	#N/A	#N/A	0.492	-0.8064	1.5	0.585
Tb927.9.13430	ubiquitin carboxyl-terminal hydrolase, Clan CA cysteine peptidase, family C12, putative	Ubiquitin.proteasome	Tb927.09.13430	-	NA	1915	-0.6181	5.46e-27	3.5908	1.30453e-58	3.59	5.71e-48	1.09	2.0886	1	0	0	1	1.2156	0.969	-0.103	1.8118	0.87	-0.2009
Tb927.9.15660	ACP6	ESAG	Tb927.09.15660	+	NA	1413	0.2743	0.000165	-0.4934	0.893714	-0.3805	0.758	1.3	2.0875	0	0	0	0	1.338	1.3336	0.236	-0.6395	1.88	0.9107
Tb927.8.5190	hypothetical protein, conserved	ZUnknown	Tb927.08.5190	+	1495	498	0.2463	0.0251	0.7486	0.116164	0.7322	0.0369	1.97	2.0875	0	0	0	0	0.0813	0.2677	0.04	0.6485	1.05	0.0704
Tb927.6.690	hypothetical protein, conserved, no clear yeast or human matches	ZUnknown	Tb927.06.0690	-	3066	1412	1.2624	5.22e-86	1.6753	0.00235496	1.7265	0.000312	2.01	2.0863	0	1	0	1	-1.1751	0.7576	0.368	0.6006	1.42	0.5059
Tb927.10.14450	hypothetical protein, conserved	ZUnknown	Tb927.10.14450	-	1227	696	0.4393	4.64e-07	0.529	0.229906	0.4473	0.0207	1.13	2.0852	0	0	0	0	0.2148	0.1739	0.286	0.5913	0.97	-0.0439
Tb927.6.860	hypothetical protein	ZUnknown	Tb927.06.0860	-	6743	1946	0.0745	0.276	0.446	0.425435	0.8124	0.0464	1.65	2.0818	0	0	0	0	-0.0968	0.9291	1.148	0.6611	1.35	0.433
Tb927.3.4250	hypothetical protein, conserved	ZUnknown	Tb927.03.4250	-	1774	1398	0.3732	6.78e-09	0.0131	1	0.0087	0.999	2.18	2.0784	0	0	0	0	-0.4281	-0.0747	0.157	-1.1969	1.05	0.0704
Tb927.10.480	hypothetical protein, conserved, poly(Q), Kinetoplastid-specific	ZUnknown	Tb927.10.00480	+	2058	962	0.5727	2.63e-12	3.5368	2.1032e-09	2.6914	9.12e-08	1.94	2.0738	0	0	0	1	0.6459	0.5139	-0.189	0.9356	1.24	0.3103
Tb927.8.6610	hypothetical protein, conserved	ZUnknown	Tb927.08.6610	-	1454	819	-0.4395	3.89e-07	-0.519	0.00260049	-0.501	0.00634	1.52	2.0738	0	0	0	0	-0.261	-0.2	0.043	0.3642	1.02	0.0286
Tb927.9.10560	POMP6/TbLOK1	Mito.membrane	Tb927.09.10560	-	NA	1115	0.1405	0.0755	-0.2068	0.893631	-0.3223	0.3	1.82	2.0727	0	0	0	0	-0.9932	0.0138	0.252	-1.3798	1.6	0.6781
Tb927.5.3470	hypothetical protein, conserved	ZUnknown	Tb927.05.3470	-	1485	792	0.394	2.81e-05	-0.0441	1	-0.046	0.999	1.82	2.0704	0	0	0	0	-1.6023	0.3537	0.733	-0.917	1.1	0.1375
Tb927.10.14900	hypothetical protein, conserved	ZUnknown	Tb927.10.14900	+	3852	967	0.0667	0.443	1.4594	5.83243e-05	1.0774	0.0242	1.61	2.0658	0	0	0	1	0.177	0.596	0.818	1.4402	1.13	0.1763
Tb927.10.2210	ubiquitin carboxyl-terminal hydrolase, Clan CA cysteine peptidase, family C12, putative	Ubiquitin.proteasome	Tb927.10.02210	+	3465	1227	0.3586	2.46e-05	0.1504	1	0.1225	0.999	1.97	2.06	0	0	0	0	-0.8042	1.2664	1.532	-0.6979	1.01	0.0144
Tb927.11.4570	Ras-related protein Rab5B	Vesicular.transport	Tb927.11.04570	+	NA	1081	0.349	2.62e-06	0.7417	0.106947	0.7214	2.82e-08	1.75	2.0566	0	0	0	0	0.3125	0.25	-0.441	1.0063	1.12	0.1635
Tb927.11.2080	hypothetical protein, conserved	ZUnknown	Tb927.11.02080	+	NA	705	0.0551	0.607	0.0052	1	-0.0159	0.999	2.53	2.0566	0	0	0	0	-0.967	-0.1992	0.574	0.0234	1.09	0.1243
Tb927.8.6010	Heme uptake protein LHR1	Transporter	Tb927.08.6010	+	1331	358	-0.1348	0.298	0.1302	1	0.0992	0.999	2.19	2.0543	0	0	0	0	-2.2197	0.4623	1.176	-2.3576	0.98	-0.0291
Tb927.10.11630	PSP1 C-terminal conserved region, putative	ZUnknown	Tb927.10.11630	+	2752	1684	0.2908	2.5e-06	0.5023	0.839962	0.7538	0.0826	1.12	2.038	0	0	0	0	-1.1019	1.0047	0.738	-0.6791	1.11	0.1506
Tb927.3.1630	CK1 casein kinase 1	Protein.kinase	Tb927.03.1630	-	4595	1224	-0.0299	0.733	2.8022	3.07706e-17	2.0623	3.09e-07	1.13	2.038	0	0	0	1	-0.0477	0.8704	0.22	1.0499	0.95	-0.074
Tb927.10.2340	hypothetical protein, conserved, t-SNARE like	Vesicular.transport	Tb927.10.02340	+	1290	311	-0.0987	0.527	0.24	0.9024	0.2151	0.834	1.14	2.0333	0	0	0	0	0.5955	0.1018	0.139	0.3417	0.9	-0.152
Tb927.7.520	cytochrome b5-like Heme/Steroid binding domain containing protein, putative	ZUnknown	Tb927.07.0520	-	2501	542	-0.5187	3.36e-06	1.8181	5.47022e-08	1.7143	1.86e-07	2.66	2.0297	0	0	0	1	0.3024	0.5696	0.954	-0.149	1.09	0.1243
Tb927.7.3670	TrkA-N domain containing protein, putative	ZUnknown	Tb927.07.3670	-	2206	1600	-0.039	0.601	0.3306	0.423006	0.331	0.0408	2.11	2.0297	0	0	0	0	-0.1074	0.1955	-0.384	0.5429	1.05	0.0704
Tb927.7.3320	ATG12/APG12, putative (ATG12)	Lysosome	Tb927.07.3320	-	1423	448	0.1376	0.275	-0.3084	0.6612	-0.2494	0.297	1.64	2.0286	0	0	0	0	0.484	0.0147	0.227	0.497	1.06	0.0841
Tb927.11.490	hypothetical protein, conserved	ZUnknown	Tb927.11.00490	-	NA	814	1.8675	2.38e-93	1.575	6.85813e-05	1.1606	0.00693	2.68	2.0215	0	1	0	1	0.1841	0.3523	0.481	1.8152	3.24	1.696
Tb927.4.2970	chaperone DNAj, putative, J12	Chaperone	Tb927.04.2970	+	1016	663	-0.4332	9.21e-07	-0.2319	1	-0.207	0.914	3.24	2.0144	0	0	0	0	-0.2299	0.3478	0.483	0.2109	1.08	0.111
Tb927.10.580	hypothetical protein, conserved	ZUnknown	Tb927.10.00580	+	1083	391	0.2872	0.0113	0.3592	0.681444	0.3959	0.299	1.53	2.0132	0	0	0	0	-0.3651	0.4383	0.206	0.456	0.88	-0.1844
Tb927.3.2930	RBP6	RNA.binding	Tb927.03.2930	-	1312	452	0.1446	0.318	1.2399	0.546516	1.0313	0.534	1.73	2.0084	0	0	0	0	0.4389	0.3031	-0.754	3.1452	1.12	0.1635
Tb927.7.4480	adenosine 5'-monophosphoramidase, putative	Nucleotides	Tb927.07.4480	-	889	2620	0.4036	3.21e-10	0.2151	1	0.2151	0.999	2.27	2.0072	0	0	0	0	0.0614	-0.9756	-0.536	-1.025	1.06	0.0841
Tb927.10.440	hypothetical protein, conserved	ZUnknown	Tb927.10.00440	+	988	340	0.2738	0.0309	0.0573	1	0.0319	0.999	1.81	2	0	0	0	0	0.1789	-0.5202	0.12	-0.2707	1.2	0.263
Tb927.5.3780	hypothetical protein, conserved	ZUnknown	Tb927.05.3780	+	2720	1680	0.5165	1.82e-16	1.1514	7.32644e-05	1.1028	0.000517	1.03	2	0	0	0	1	-0.0242	0.6098	0.346	-0.5819	1.09	0.1243
Tb927.5.4450	hypothetical protein, conserved	ZUnknown	Tb927.05.4450	-	1125	541	0.0092	0.956	-0.211	0.862295	-0.2508	0.712	2.31	2	0	0	0	0	-0.6539	-0.0541	0.333	-0.4325	0.97	-0.0439
Tb927.4.1880	hypothetical protein, conserved	ZUnknown	Tb927.04.1880	-	4363	1207	0.3778	1.28e-07	0.5475	0.0939898	0.4977	0.438	1.76	1.994	0	0	0	0	-0.1748	1.0371	0.299	0.2769	0.92	-0.1203
Tb927.8.6350	CYC11, CYC2-like cyclin	Cell.cycle	Tb927.08.6350	+	5620	1599	0.2658	2.75e-05	0.9906	0.0870031	0.8971	0.00195	1.21	1.9855	0	0	0	0	-0.0529	0.5743	0.164	0.8419	1.05	0.0704
Tb927.4.980	actin, putative	Cytoskeleton	Tb927.04.0980	-	1720	748	-0.5839	5.83e-10	-0.5175	0.198616	-0.5073	0.159	3.23	1.9855	0	0	0	0	-0.6788	0.1377	0.383	-0.2136	1.02	0.0286
Tb927.8.3420	hypothetical protein, conserved	ZUnknown	Tb927.08.3420	+	657	443	-1.9113	1.19e-66	-0.4762	0.0551262	-0.4397	0.0689	0.75	1.9843	1	0	0	0	-0.1121	-0.0333	0.777	0.1062	0.78	-0.3585
Tb927.7.2660	ZC3H20	RNA.binding	Tb927.07.2660	-	6611	1816	-0.0935	0.25	0.7706	0.0177168	0.0887	0.999	1.82	1.9819	0	0	0	1	-1.7305	1.1505	-0.667	-0.9427	0.83	-0.2688
Tb927.3.4830	hypothetical protein	ZUnknown	Tb927.03.4830	-	2504	480	0.3856	0.000158	1.1684	0.000332127	0.8309	0.0176	1.75	1.9806	0	0	0	1	0.1264	0.3839	0.081	3.7786	1.21	0.275
Tb927.8.7820	hypothetical protein, conserved, Cold-shock DNA-binding domain.	ZUnknown	Tb927.08.7820	+	1515	1362	-0.662	2.57e-15	3.3856	7.51696e-15	3.2987	6.71e-15	1.34	1.9733	1	0	0	1	1.0168	0.9233	0.749	3.9366	0.84	-0.2515
Tb927.6.3270	hypothetical protein, conserved	ZUnknown	Tb927.06.3270	+	1424	487	0.2161	0.0402	0.31	1	0.1848	0.999	1.91	1.9721	0	0	0	0	-0.3288	-0.7055	-0.407	-0.5852	1.06	0.0841
Tb927.10.9600	protein kinase, putative,tyrosine protein kinase, putative	Protein.kinase	Tb927.10.09600	+	1745	2593	0.2832	2.07e-06	4.0479	1.38612e-30	4.1241	3.62e-36	0.75	1.9721	0	0	0	1	-0.4627	0.7563	0.294	-0.5053	1	0
Tb927.10.12170	RAB-interacting protein, putative	Signalling	Tb927.10.12170	+	1215	938	0.8432	5.29e-25	0.5531	0.0109919	0.5493	0.000205	1.03	1.9709	0	1	0	0	0.2892	-0.2389	0.651	0.0279	1.08	0.111
Tb927.10.15340	hypothetical protein	ZUnknown	Tb927.10.15340	+	NA	488	-0.4028	0.00108	-0.1582	1	-0.085	0.999	2.29	1.9672	0	0	0	0	#N/A	#N/A	-0.158	-0.1244	1.11	0.1506
Tb927.11.6890	DNA repair and recombination helicase protein PIF1	Mito.DNA	Tb927.11.06890	-	NA	5094	-0.0862	0.133	0.4887	0.773125	0.489	0.689	1.44	1.9635	0	0	0	0	-0.04	0.8266	0.165	-0.177	1.05	0.0704
Tb927.3.1960	hypothetical protein, conserved	ZUnknown	Tb927.03.1960	-	3667	362	-0.0845	0.553	-0.0497	1	-0.0784	0.999	2.29	1.961	0	0	0	0	-0.2636	0.1114	0.864	-0.2965	1.07	0.0976
Tb927.11.6600	hypothetical protein, conserved	ZUnknown	Tb927.11.06600	-	NA	1905	-0.0368	0.674	1.2536	0.17695	2.596	5.4e-10	1.57	1.961	0	0	0	0	0.9883	0.5452	0.12	0.8312	0.92	-0.1203
Tb927.2.2340	Glycerophosphoryl diester phosphodiesterase family, putative	ZUnknown	Tb927.02.2340	-	4119	3291	0.0479	0.434	1.9497	3.10395e-13	1.9391	4.83e-10	1.44	1.9561	0	0	0	1	0.6218	0.4279	0.514	0.488	0.99	-0.0145
Tb927.11.15160	hypothetical protein, conserved	ZUnknown	Tb927.11.15160	-	NA	1887	0.2051	0.000863	0.4426	1	0.5351	0.813	2.19	1.9511	0	0	0	0	0.711	0.5887	-0.161	0.3623	0.82	-0.2863
Tb927.9.5960	SDH2C succinate dehydrogenase (complex II) subunit	Mito.e.transport	Tb927.09.05960	+	NA	876	0.9483	1.12e-23	0.2759	0.983129	0.2021	0.99	2.78	1.9498	0	1	0	0	-1.1171	-0.1317	0.046	-0.2818	1.14	0.189
Tb927.4.4230	RBP31	RNA.binding	Tb927.04.4230	-	6606	1508	0.3562	6.41e-08	2.741	5.12121e-13	1.5642	5.07e-08	1.57	1.9486	0	0	0	1	0.99	0.3824	-0.022	1.2464	1.36	0.4436
Tb927.7.3730	RBP26	RNA.binding	Tb927.07.3730	-	1957	1580	-0.2451	0.000336	4.6601	6.89533e-44	4.5311	2.56e-50	1.83	1.9436	0	0	0	1	2.016	0.3238	-0.256	0.9965	1.07	0.0976
Tb927.10.2420	hypothetical protein	ZUnknown	Tb927.10.02420	-	950	380	0.7614	3.15e-09	-0.0624	1	-0.1085	0.986	2.44	1.9386	0	1	0	0	#N/A	0.2756	-0.188	-0.4464	1.51	0.5945
Tb927.11.16550	ZC3H46	RNA.binding	Tb927.11.16550	-	NA	2351	0.4198	8.55e-11	0.7904	0.17695	1.4104	0.00127	1.9	1.9386	0	0	0	0	0.7887	-0.2151	-1.239	1.1336	1.33	0.4114
Tb927.10.1670	hypothetical protein	ZUnknown	Tb927.10.01670	-	484	28	-0.4638	0.293	-0.4427	1	-0.5067	0.965	2.36	1.9373	0	0	0	0	-0.4457	0.0948	0.534	0.2925	1.06	0.0841
Tb927.4.4020	amino acid transporter, putative	Amino.acid.transport	Tb927.04.4020	-	NA	3199	-0.4001	1.69e-16	0.6908	0.0540257	0.6287	0.00011	2.48	1.9285	0	0	0	0	#N/A	#N/A	0.269	2.8692	1.14	0.189
Tb927.11.9040	conserved protein	ZUnknown	Tb927.11.09040	+	NA	508	0.1808	0.105	0.5262	0.166854	0.508	0.103	1.72	1.926	0	0	0	0	-0.561	0.0036	-0.388	-0.9156	1.35	0.433
Tb927.10.780	Ring finger domain containing protein, putative	ZUnknown	Tb927.10.00780	+	1069	1027	0.6545	6.24e-15	0.9822	0.126033	0.8221	0.181	1.86	1.9247	0	1	0	0	1.2293	0.2503	-0.133	0.8334	1.19	0.251
Tb927.11.16820	hypothetical protein, conserved	ZUnknown	Tb927.11.16820	-	NA	1130	0.0907	0.28	1.8518	1.88483e-09	0.8383	0.0265	1.12	1.9184	0	0	0	1	-0.937	0.5556	-0.144	-0.6665	1.7	0.7655
Tb927.8.1000	hypothetical protein, conserved	ZUnknown	Tb927.08.1000	-	1653	664	0.2907	0.00226	0.0209	1	0.0394	0.999	2.5	1.9184	0	0	0	0	-0.4266	0.1848	0.278	0.2465	1.04	0.0566
Tb927.6.2530	hypothetical protein	ZUnknown	Tb927.06.2530	+	2829	682	-0.1676	0.513	1.3617	0.0230233	0.7639	0.233	0.96	1.9158	0	0	0	1	0.6346	0.1445	0.563	1.8604	1.37	0.4542
Tb927.6.810	hypothetical protein	ZUnknown	Tb927.06.0810	-	1113	114	-0.2276	0.34	0.4841	0.954904	0.804	0.036	1.72	1.9095	0	0	0	0	-1.3168	-0.1339	-0.371	-0.3972	0.98	-0.0291
Tb927.11.6040	Nodulin-like, putative	ZUnknown	Tb927.11.06040	-	NA	1138	0.3545	1.66e-05	-0.2061	1	-0.2231	0.857	1.35	1.9082	0	0	0	0	-0.7482	0.1117	0.415	-0.7505	1.26	0.3334
Tb927.7.4190	zinc finger domain, LSD1 subclass, putative	Zinc.finger	Tb927.07.4190	+	1770	673	-0.1019	0.333	0.0636	1	-0.0197	0.999	1.36	1.9069	0	0	0	0	0.3681	-0.4919	-0.345	0.8891	0.82	-0.2863
Tb927.10.12080	hypothetical protein, conserved	ZUnknown	Tb927.10.12080	+	2026	526	0.092	0.444	-0.1073	1	-0.1326	0.999	1.59	1.9043	0	0	0	0	0.2776	-0.1557	0.503	-0.2198	1.12	0.1635
Tb927.10.12580	hypothetical protein	ZUnknown	Tb927.10.12580	+	375	65	-0.2823	0.334	1.5505	0.116689	1.7432	0.0786	1.36	1.903	0	0	0	0	#N/A	-0.0201	-1.589	-0.4193	0.62	-0.6897
Tb927.6.1620	Zn-finger in Ran binding protein and others, putative	Zinc.finger	Tb927.06.1620	-	1242	818	0.4489	9.22e-08	0.8987	0.212467	0.8606	0.195	1.62	1.9005	0	0	0	0	-0.1911	0.5477	0.449	0.6832	1.09	0.1243
Tb927.11.15030	small GTPase (X3)	Vesicular.transport	Tb927.11.15030	-	NA	1330	0.4479	3.6e-10	1.7546	2.9364e-05	1.1268	3.93e-05	1.88	1.8979	0	0	0	1	0.2865	0.0912	-0.254	0.4447	2.03	1.0215
Tb927.2.1740	hypothetical protein, conserved	ZUnknown	Tb927.02.1740	+	2521	383	0.2639	0.0252	0.4899	0.808134	0.2718	0.929	1.51	1.8901	0	0	0	0	0.7367	0.4722	0	-0.256	1.01	0.0144
Tb927.11.16830	IFT22 (was RABL5) (in UPF1-TAP)	Cytoskeleton	Tb927.11.16830	-	NA	1827	0.3905	2.42e-11	0.787	0.00375543	0.7115	0.000205	1.87	1.8888	0	0	0	1	0.2065	-0.3633	-0.978	-0.0121	1.65	0.7225
Tb927.9.1610	CDP-diacylglycerol--inositol 3-phosphatidyltransferase, putative	Lipids	Tb927.09.01610	-	NA	970	0.093	0.279	-0.0047	1	-0.0054	0.999	1.78	1.8875	0	0	0	0	-0.4935	-0.1787	-0.465	-0.0027	1	0
Tb927.10.340	mitochondrial structure specific endonuclease I (SSE-1), putative	Mito.DNA	Tb927.10.00340	+	899	552	0.1279	0.242	0.0583	1	0.0637	0.999	2.12	1.8862	0	0	0	0	-0.11	0.1258	0.131	-0.1694	1.12	0.1635
Tb927.6.830	hypothetical protein, conserved	ZUnknown	Tb927.06.0830	-	1686	449	-0.1046	0.415	0.3971	0.810657	0.163	0.99	2.05	1.8836	0	0	0	0	-1.3282	0.2244	1.32	0.0989	1.24	0.3103
Tb927.8.7790	zinc finger domain, LSD1 subclass, putative	Zinc.finger	Tb927.08.7790	+	2285	842	-1.0637	1.89e-38	1.707	5.78643e-05	0.9918	0.00114	2.03	1.8758	1	0	0	1	0.6259	0.3458	-0.093	1.066	1.02	0.0286
Tb927.5.1360	nucleoside 2-deoxyribosyltransferase (NDRT)	Nucleotides	Tb927.05.1360	+	1398	998	-0.3186	3.42e-05	0.2815	0.984492	0.2746	0.934	2.08	1.8718	0	0	0	0	1.2569	-0.8325	-0.489	-1.0561	1.17	0.2265
Tb927.7.2230	mitochondrial carrier protein, putative	Mito.transport	Tb927.07.2230	-	1898	1781	-0.4869	2.91e-15	-0.3821	0.88788	-0.3301	0.86	1.93	1.8718	0	0	0	0	-0.3204	-0.0669	0.547	-0.9367	1.16	0.2141
Tb927.10.2390	protein kinase, putative,casein kinase I, putative	Protein.kinase	Tb927.10.02390	+	1338	1173	0.0563	0.558	0.7235	0.701338	0.7692	0.615	2.65	1.8718	0	0	0	0	1.9005	0.3465	-0.081	1.493	1.09	0.1243
Tb927.11.6060	Maf1, binds polIII promoters & represses transcription	ZUnknown	Tb927.11.06060	-	NA	1143	-0.5051	1.72e-13	-0.0329	1	-0.0586	0.999	2.42	1.8626	0	0	0	0	-0.1381	-0.4854	-0.334	0.7537	1.09	0.1243
Tb927.10.3300	Domain of unknown function (DUF4206), putative	ZUnknown	Tb927.10.03300	+	1657	598	0.2318	0.0151	-0.2259	0.980997	-0.2191	0.561	1.59	1.8626	0	0	0	0	-1.7291	0.4787	1.037	-0.9526	1.04	0.0566
Tb927.8.8130	hypothetical protein, conserved	ZUnknown	Tb927.08.8130	+	4408	1561	-0.5689	7.09e-21	0.7703	0.30806	0.6493	0.0708	1.65	1.8547	0	0	0	0	0.5301	0.9352	0.783	0.9773	1.11	0.1506
Tb927.9.7100	hypothetical protein, conserved	ZUnknown	Tb927.09.07100	+	NA	492	0.5754	1.28e-08	0.745	0.159345	0.6647	0.0194	1.63	1.8533	0	0	0	0	-0.2221	0.5686	0.078	0.4603	1.07	0.0976
Tb927.5.480	hypothetical protein, conserved	ZUnknown	Tb927.05.0480	-	3176	1053	0.3766	5.44e-07	0.8278	0.0724154	0.8535	0.0405	1.38	1.852	0	0	0	0	0.9812	-0.0482	0.29	0.7542	0.87	-0.2009
Tb927.11.4670	hypothetical protein, conserved	ZUnknown	Tb927.11.04670	+	NA	652	0.286	0.00738	-0.0373	1	0.0622	0.999	1.58	1.844	0	0	0	0	-0.0871	-0.1147	0.326	0.6425	1.1	0.1375
Tb927.10.9610	hypothetical protein	ZUnknown	Tb927.10.09610	+	3575	994	0.3515	7.51e-06	3.2518	3.43823e-09	3.827	2.16e-13	0.79	1.844	0	0	0	1	0.9674	0.646	0.43	-0.6122	1.1	0.1375
Tb927.8.4700	AAT5 Arginine transporter	Amino.acid.transport	Tb927.08.4700	-	4494	5675	0.8891	6.38e-11	0.7945	0.0826759	0.4322	0.364	0.94	1.8426	0	1	0	0	-0.8997	1.0595	0.935	-0.4969	4.2	2.0704
Tb927.4.3970	hypothetical protein, conserved, kinetoplastid-specific	ZUnknown	Tb927.04.3970	-	5383	1141	-0.1555	0.039	1.9678	0.000122027	1.3978	0.000329	1.34	1.8373	0	0	0	1	0.2916	0.961	0.404	1.7807	1.16	0.2141
Tb927.10.10440	mitochondrial carrier protein, MCP8	Mito.transport	Tb927.10.10440	-	1147	1080	-0.1699	0.0761	-0.166	1	-0.1422	0.986	1.62	1.8346	0	0	0	0	-0.4003	-0.167	0.334	0.5229	1.03	0.0426
Tb927.9.1920	hypothetical protein, conserved	ZUnknown	Tb927.09.01920	-	NA	475	0.4389	0.000102	-0.2967	0.406218	-0.304	0.3	1.97	1.8319	0	0	0	0	-1.9886	-0.0238	0.511	-1.5454	1.09	0.1243
Tb927.7.2610	hypothetical protein, conserved	ZUnknown	Tb927.07.2610	-	1521	1050	-0.1447	0.132	0.258	0.579173	0.2296	0.339	1.79	1.8319	0	0	0	0	0.9078	0.3184	-0.059	0.6709	0.95	-0.074
Tb927.2.1820	protein kinase, putative	Protein.kinase	Tb927.02.1820	+	1866	2763	0.6732	3.09e-36	2.1963	2.01323e-09	2.1354	1.34e-08	1.37	1.8292	0	1	0	1	-0.7598	0.2217	-0.49	0.3532	1.44	0.5261
Tb927.1.4020	hypothetical protein	ZUnknown	Tb927.01.4020	+	537	827	0.3861	5.04e-06	0.9637	0.110663	0.8656	0.127	1.2	1.8278	0	0	0	0	0.5254	0.5555	-0.767	0.2527	1.02	0.0286
Tb927.8.1760	hypothetical protein	ZUnknown	Tb927.08.1760	-	964	612	-0.717	8.79e-12	0.5274	0.185762	0.471	0.315	1.31	1.8237	1	0	0	0	0.1995	-0.4159	0.216	-0.8819	0.68	-0.5564
Tb927.11.2400	Flabarin-like	Cytoskeleton	Tb927.11.02400	+	NA	2545	0.4731	4.92e-15	1.6052	0.00413792	0.6745	0.0778	1.49	1.8224	0	0	0	1	4.4846	-1.0156	-1.135	2.8417	1.67	0.7398
Tb927.1.2710	hypothetical protein, conserved	ZUnknown	Tb927.01.2710	+	2681	1443	-0.7102	1.87e-29	-0.3622	0.241078	-0.4865	0.164	1.45	1.821	1	0	0	0	0.2027	0.57	-0.03	0.628	1.13	0.1763
Tb927.7.1790	Adenine phosphoribosyltransferase, putative	Nucleotides	Tb927.07.1790	+	1946	602	0.4137	3.62e-05	0.1837	1	0.1648	0.999	2.57	1.8197	0	0	0	0	-0.688	0.7094	1.074	-1.1438	1	0
Tb927.8.1150	KKT9 Kinetochore protein	Cell.cycle	Tb927.08.1150	-	2188	2033	-0.0902	0.366	0.1639	1	0.3469	0.461	2.9	1.8183	0	0	0	0	0.0012	0.0561	-0.592	-1.0386	0.8	-0.3219
Tb927.8.720	CIA2B, Fe-S cluster biogenesis	Enzyme	Tb927.08.0720	-	2025	636	-0.7778	3.64e-15	-0.5253	0.41388	-0.4854	0.27	1.75	1.8169	1	0	0	0	-0.6259	0.1004	0.528	0.0261	1.13	0.1763
Tb927.6.1780	MAPK4 protein kinase	Protein.kinase	Tb927.06.1780	-	3214	1021	-0.2921	8.07e-05	-0.0554	1	-0.1516	0.999	2.09	1.8128	0	0	0	0	1.479	-0.1428	-0.297	-0.4978	1.52	0.6041
Tb927.3.5390	Ring finger domain containing protein, putative	ZUnknown	Tb927.03.5390	+	3832	1501	0.3755	1.56e-08	0.3546	1	0.3803	0.879	1.42	1.806	0	0	0	0	1.5095	0.2957	-0.345	-0.3563	1.03	0.0426
Tb927.10.6210	TPR repeat, putative	ZUnknown	Tb927.10.06210	-	2036	2195	0.4757	1.14e-17	0.5228	0.0166348	0.4683	0.000886	1.77	1.8046	0	0	0	0	0.229	-0.2713	0.074	0.4778	1.86	0.8953
Tb927.8.8350	mitotic centromere-associated kinesin (MCAK), putative	Cell.cycle	Tb927.08.8350	+	NA	2250	-0.7595	1.11e-32	2.0129	3.31548e-14	2.1368	1.52e-13	1.9	1.7977	1	0	0	1	#N/A	#N/A	0.181	1.3965	1.2	0.263
Tb927.9.14130	hypothetical protein, conserved	ZUnknown	Tb927.09.14130	-	NA	2808	0.334	1.85e-07	0.186	1	0.1653	0.999	2.73	1.7977	0	0	0	0	1.4987	0.1007	-0.217	0.8176	1.11	0.1506
Tb927.11.10340	Phosphoglycerate mutase-like	Glucose.glycerol	Tb927.11.10340	+	NA	2137	-1.1294	4.76e-66	-0.0753	1	0.0527	0.999	2.44	1.7977	1	0	0	0	-1.3044	-0.243	0.065	-0.6581	0.99	-0.0145
Tb927.9.14100	hypothetical protein, conserved	ZUnknown	Tb927.09.14100	-	NA	1258	-0.1013	0.175	0.3229	0.856	0.2786	0.879	1.84	1.7866	0	0	0	0	0.4512	0.4566	0.313	0.2614	0.99	-0.0145
Tb927.7.290	leucine-rich repeat protein (LRRP)	LRRP	Tb927.07.0290	+	2664	1661	-0.0208	0.796	-0.0155	1	-0.04	0.999	1.3	1.7852	0	0	0	0	-0.6297	0.7137	-0.021	-0.3842	1.03	0.0426
Tb927.1.1580	cytochrome c oxidase assembly factor, SCO1/2, putative	Mito.e.transport	Tb927.01.1580	+	927	580	0.1785	0.0796	-0.2361	1	-0.2499	0.901	1.56	1.7838	0	0	0	0	-1.4114	0.0332	0.447	-1.0432	1.15	0.2016
Tb927.6.2890	single strand-specific nuclease, putative	DNA	Tb927.06.2890	+	1994	718	-0.5143	2.16e-09	-0.8034	0.286084	-0.8207	0.0018	1.98	1.781	0	0	0	0	-1.2778	0.7091	1.4	-0.0177	1.12	0.1635
Tb927.3.3920	AUK2 serine/threonine-protein kinase	Protein.kinase	Tb927.03.3920	+	1151	1000	-0.0949	0.259	-0.056	1	-0.0815	0.999	1.27	1.7768	0	0	0	0	-0.6945	-0.2192	-0.801	-0.4062	1.03	0.0426
Tb927.1.2820	pteridine transporter, putative	Transporter	Tb927.01.2820	-	2553	6120	0.916	5.35e-53	-0.176	1	-0.2117	0.999	0.72	1.7754	0	1	0	0	-1.2402	0.7419	0.343	-2.0021	1.07	0.0976
Tb927.7.6700	hypothetical protein	ZUnknown	Tb927.07.6700	-	4988	1401	0.0585	0.484	1.1172	0.00941788	1.2094	0.00209	1.89	1.774	0	0	0	1	0.3938	0.3726	0.031	0.96	0.72	-0.4739
Tb927.9.11810	membrane transporter protein, putative	Transporter	Tb927.09.11810	+	NA	1510	0.5306	6.75e-15	0.4102	0.162987	0.3738	0.0181	1.61	1.7726	0	0	0	0	0.6133	0.4935	0.135	1.4845	1.37	0.4542
Tb927.4.2660	hypothetical protein, conserved	ZUnknown	Tb927.04.2660	+	732	211	-0.2408	0.138	-0.3569	0.794621	-0.324	0.627	1.7	1.7726	0	0	0	0	-2.0831	-0.4301	0.966	-1.3795	1	0
Tb927.1.690	hypothetical protein, conserved	ZUnknown	Tb927.01.0690	-	835	787	0.1802	0.0384	0.0816	1	0.0829	0.995	2.19	1.7712	0	0	0	0	-0.6427	-0.3185	0.327	-0.1379	1.04	0.0566
Tb927.7.6220	protein kinase, putative	Protein.kinase	Tb927.07.6220	-	3535	2443	0.1464	0.0184	1.4877	3.57756e-06	1.4158	7.32e-06	1.1	1.7669	0	0	0	1	0.5202	0.3399	-0.446	0.0321	1.15	0.2016
Tb927.4.1640	UDP-galactose transporter, putative	Glycans	Tb927.04.1640	-	1646	2199	-0.0296	0.723	0.0029	1	-0.0326	0.999	1.55	1.7599	0	0	0	0	0.7526	-0.3347	-0.908	-0.0959	1.05	0.0704
Tb927.3.710	RING-variant domain containing protein, putative	ZUnknown	Tb927.03.0710	-	3242	1604	0.0211	0.817	-0.1652	1	0.0486	0.999	1.12	1.7584	0	0	0	0	1.0448	0.2541	0.727	-0.0626	1.18	0.2388
Tb927.5.1050	hypothetical protein	ZUnknown	Tb927.05.1050	+	3420	488	0.8966	3.37e-14	0.1322	1	0.0124	0.999	2.53	1.7513	0	1	0	0	0.1139	0.7103	0.015	-1.5476	1.28	0.3561
Tb927.1.1210	conserved protein, unknown function	ZUnknown	Tb927.01.1210	+	1020	448	0.0488	0.769	-0.1384	1	-0.1317	0.999	1.86	1.7499	0	0	0	0	-0.6777	-0.1763	0.142	-0.4669	1.16	0.2141
Tb927.11.15840	Amino acid transporter AAT16 Lys, Arg, high affinity Lysine	Amino.acid.transport	Tb927.11.15840	-	NA	20702	-0.5561	8e-51	-0.2573	1	-0.2484	0.441	1.12	1.7499	0	0	0	0	-0.6288	-0.1883	0.661	0.0194	0.92	-0.1203
Tb927.11.14060	hypothetical protein, conserved	ZUnknown	Tb927.11.14060	+	NA	791	0.6089	1.61e-13	0.1815	0.988666	0.1818	0.757	1.57	1.7485	0	1	0	0	0.0819	0.0528	0.88	-0.4051	1.13	0.1763
Tb927.3.3210	hypothetical protein	ZUnknown	Tb927.03.3210	-	972	650	-0.4928	1.18e-06	-0.0485	1	-0.0312	0.999	1.12	1.7485	0	0	0	0	1.7613	-0.1624	0.306	0.2018	1.09	0.1243
Tb927.2.2880	TPR repeat/Tetratricopeptide repeat, putative	ZUnknown	Tb927.02.2880	+	1519	1457	-0.1857	0.00715	0.0312	1	0.013	0.999	1.91	1.747	0	0	0	0	0.0167	0.0564	0.198	-0.1253	1.1	0.1375
Tb927.7.2270	hypothetical protein, conserved	ZUnknown	Tb927.07.2270	-	1561	852	-0.0324	0.744	-0.5009	0.899602	-0.543	0.577	1.61	1.747	0	0	0	0	-0.3557	-0.137	-0.182	0.6037	1.09	0.1243
Tb927.7.3650	protein kinase, putative	Protein.kinase	Tb927.07.3650	-	3001	2935	0.1401	0.0156	1.3473	6.70127e-10	1.419	7.28e-07	1.52	1.7442	0	0	0	1	0.7367	0.2358	-0.119	0.5613	1.06	0.0841
Tb927.7.4110	Kinesin-like but poor match	Cytoskeleton	Tb927.07.4110	+	4993	2548	0.0028	0.973	1.1206	0.0140664	0.9929	0.00289	1.02	1.7398	0	0	0	1	0.8125	0.8987	-0.362	0.2086	1.22	0.2869
Tb927.9.1590	hypothetical protein, conserved, weakly matches human ferrochelateases because of twin Cys-X9-Cys motifs	ZUnknown	Tb927.09.01590	-	NA	277	-0.1554	0.284	-0.2597	0.981336	-0.2638	0.903	1.4	1.7398	0	0	0	0	-1.4419	-0.2275	-0.157	-2.0213	1.03	0.0426
Tb927.9.10280	ZC3H48	RNA.binding	Tb927.09.10280	-	NA	379	1.0117	4.44e-19	1.4794	0.0512018	1.7227	0.00381	2.03	1.7326	0	1	0	0	-0.2102	0.612	0.478	3.0476	0.86	-0.2176
Tb927.8.7960	hypothetical protein	ZUnknown	Tb927.08.7960	+	1440	969	-1.1932	8.97e-52	0.9271	0.228097	0.894	0.0396	1.57	1.7297	1	0	0	0	1.4081	-0.2313	-0.202	1.4641	1.2	0.263
Tb927.11.15550	NADH-cytochrome b5 reductase, putative (B5R)	Mito.e.transport	Tb927.11.15550	-	NA	606	0.3731	0.000172	0.0633	1	0.1129	0.999	2.18	1.7297	0	0	0	0	-1.4583	0.2646	-0.008	-1.9668	0.93	-0.1047
Tb927.11.7390	hypothetical protein, conserved, extremely weak but blast-back positive match to yeast PDH1 which may participate in conversion of 2-methylcitrate to 2-methylisocitrate	Enzyme	Tb927.11.07390	+	NA	698	0.4157	2.04e-05	0.0858	1	0.0526	0.999	1.41	1.7225	0	0	0	0	-0.7795	0.2353	0.501	-0.3443	0.93	-0.1047
Tb927.11.12100	RBP5	RNA.binding	Tb927.11.12100	+	NA	726	0.8631	1.26e-23	0.7297	0.526913	0.7202	0.304	0.96	1.7195	0	1	0	0	-1.3524	0.9359	2.728	-0.6836	0.97	-0.0439
Tb927.11.2860	hypothetical protein, conserved, WD40 repeats	ZUnknown	Tb927.11.02860	-	NA	2585	-0.0815	0.199	4.4028	1.13075e-65	3.8263	1.53e-53	0.73	1.7195	0	0	0	1	0.9352	0.4386	-0.305	1.2534	0.87	-0.2009
Tb927.11.14390	hypothetical protein, conserved	ZUnknown	Tb927.11.14390	+	NA	1210	0.2289	0.0028	0.0152	1	0.0148	0.999	2.07	1.7152	0	0	0	0	-0.4603	0.2179	0.609	-0.0444	1.1	0.1375
Tb927.9.12170	leucine-rich repeat protein (LRRP)	LRRP	Tb927.09.12170	+	NA	1909	0.3182	2.3e-07	2.5816	8.80832e-15	1.932	6.07e-06	1.75	1.7108	0	0	0	1	-0.1922	0.7997	0.083	0.7965	1.28	0.3561
Tb927.4.3330	hypothetical protein, conserved, EF hand	Calcium	Tb927.04.3330	-	1471	1366	0.1718	0.015	0.2315	1	0.2421	0.937	1.59	1.7093	0	0	0	0	0.4364	-0.5149	-0.81	0.0835	1	0
Tb927.11.13940	ubiquitin-conjugating enzyme e2, putative	Ubiquitin.proteasome	Tb927.11.13940	+	NA	1550	1.529	1.45e-88	2.0564	2.65032e-09	1.7641	1.36e-07	1.8	1.7049	0	1	0	1	0.6433	1.2444	0.497	1.5628	1.65	0.7225
Tb927.3.1250	RPB10 DNA-directed RNA polymerase I subunit	RNA.synthesis	Tb927.03.1250	+	813	485	0.1807	0.113	0.0015	1	-0.0913	0.999	1.3	1.7034	0	0	0	0	-0.6659	0.199	0.986	-0.0855	1.09	0.1243
Tb927.10.4810	hypothetical protein, conserved	ZUnknown	Tb927.10.04810	-	939	434	0.4453	2.58e-05	0.071	1	0.1005	0.999	1.78	1.7004	0	0	0	0	-1.284	-0.2023	0.136	-0.0092	1.29	0.3674
Tb927.3.2440	AEK1	Protein.kinase	Tb927.03.2440	+	1582	2160	0.2569	0.00125	0.561	0.445987	0.5435	0.418	2.24	1.7004	0	0	0	0	0.4486	0.9316	0.234	0.1077	1.1	0.1375
Tb927.6.3850	chaperone DNAj, putative, J9	Chaperone	Tb927.06.3850	-	1872	442	-0.0283	0.859	-0.0577	1	-0.0248	0.999	1.61	1.6975	0	0	0	0	0.1621	-0.1119	0.776	0.8234	1.24	0.3103
Tb927.2.2830	hypothetical protein, conserved	ZUnknown	Tb927.02.2830	+	1547	761	-0.5918	1.94e-13	-0.054	1	-0.0318	0.999	1.27	1.6975	1	0	0	0	1.08	-0.2061	-0.367	0.1378	0.99	-0.0145
Tb927.8.6600	SAM35, putative	Mito.membrane	Tb927.08.6600	-	948	768	-0.2025	0.0193	0.0801	1	0.0644	0.999	2.08	1.696	0	0	0	0	-0.1601	0.6407	0.389	0.4783	1.07	0.0976
Tb927.9.15480	hypothetical protein	ZUnknown	Tb927.09.15480	+	NA	942	-0.0832	0.366	0.6312	0.642821	0.6375	0.565	2.02	1.6945	0	0	0	0	1.0621	0.2625	0.785	0.5848	1.47	0.5558
Tb927.9.7550	adenylosuccinate lyase, putative	Nucleotides	Tb927.09.07550	-	NA	1749	-0.6397	1.15e-27	-0.546	0.622259	-0.5436	0.518	1.12	1.693	1	0	0	0	-0.1329	0.2523	-0.603	-1.0083	0.91	-0.1361
Tb927.10.610	hypothetical protein, conserved	ZUnknown	Tb927.10.00610	+	4647	1348	0.3166	0.000189	1.4616	2.1748e-05	1.5403	3.87e-05	2.11	1.69	0	0	0	1	0.5965	0.8819	0.179	1.2026	1.03	0.0426
Tb927.4.2460	kinatase, putative	Enzyme	Tb927.04.2460	+	4369	3053	0.1581	0.00882	0.703	0.120919	0.2762	0.802	1.06	1.6871	0	0	0	0	1.4036	1.0407	0.261	0.8018	1.46	0.546
Tb927.10.7100	delta-4 fatty acid desaturase	Lipids	Tb927.10.07100	+	1834	926	0.0492	0.623	-0.486	0.481778	-0.469	0.378	1.45	1.6871	0	0	0	0	-1.3708	-0.0362	1.557	-1.7692	1.17	0.2265
Tb927.7.6340	hypothetical protein, conserved, no clear yeast or human matches	ZUnknown	Tb927.07.6340	-	3418	2081	0.6121	1.47e-24	1.4173	4.5397e-05	1.4303	3.26e-05	1.68	1.6841	0	1	0	1	-1.6741	1.0369	0.816	0.1263	1.05	0.0704
Tb927.9.11740	cyclophilin type peptidyl-prolyl cis-trans isomerase, putative (PPIase)	Chaperone	Tb927.09.11740	+	NA	656	-0.0498	0.684	-0.5493	0.0844992	-0.562	0.0748	2.69	1.6826	0	0	0	0	-0.4681	-0.2579	-0.062	-0.2198	1.01	0.0144
Tb927.8.5550	hypothetical protein, conserved, kineto-specific	ZUnknown	Tb927.08.5550	+	1190	306	0.1795	0.202	0.1068	1	0.0711	0.999	1.16	1.6781	0	0	0	0	0.1443	0.1567	0.001	0.4694	0.91	-0.1361
Tb927.6.1600	hypothetical protein, conserved	ZUnknown	Tb927.06.1600	-	903	451	0.1011	0.448	-0.133	1	-0.0772	0.999	1.25	1.6705	0	0	0	0	-1.3658	-0.1381	0.162	-0.7261	1	0
Tb927.8.5110	hypothetical protein, conserved	ZUnknown	Tb927.08.5110	+	6409	5651	-0.0941	0.05	1.7854	9.55257e-05	1.7566	5.83e-07	0.88	1.669	0	0	0	1	0.0828	0.8584	0.282	0.3044	0.87	-0.2009
Tb927.10.3180	zinc-finger of acetyl-transferase ESCO, putative	Zinc.finger	Tb927.10.03180	+	1347	631	-0.1607	0.118	0.0661	1	-0.0574	0.999	2.01	1.6645	0	0	0	0	0.1121	0.4943	0.578	0.1482	1.37	0.4542
Tb927.10.3340	protein kinase, putative	Protein.kinase	Tb927.10.03340	+	5385	2199	-0.1222	0.062	0.6865	0.648117	0.4407	0.689	1.43	1.663	0	0	0	0	-0.8287	0.8067	0.517	0.4139	1.33	0.4114
Tb927.10.16140	Adenylate/guanylate cyclase, putative	Signalling	Tb927.10.16140	+	801	1250	0.2853	0.000323	0.2754	0.128855	0.268	0.403	1.98	1.6554	0	0	0	0	0.0201	0.1563	-0.064	0.5169	1.14	0.189
Tb927.10.8580	ARL3B	Vesicular.transport	Tb927.10.08580	+	1675	713	0.0235	0.839	0.049	1	0.0122	0.999	1.5	1.6554	0	0	0	0	-1.0001	0.1183	0.212	-0.1444	0.88	-0.1844
Tb927.8.3240	lathosterol oxidase, putative	Sterols	Tb927.08.3240	+	931	1244	0.4017	3.39e-08	0.1913	1	0.1703	0.938	1.91	1.6523	0	0	0	0	-0.8277	0.8095	-0.244	-0.2981	1.12	0.1635
Tb927.3.3340	3', 5'-cyclic nucleotide phosphodiesterase, putative (PDED)	Lipids	Tb927.03.3340	-	3866	1372	0.5594	3.01e-16	0.1465	1	0.0511	0.999	1.55	1.6523	0	0	0	0	0.688	0.8953	0.086	-1.3865	1.08	0.111
Tb927.10.1640	hypothetical protein	ZUnknown	Tb927.10.01640	-	1529	307	-0.4246	0.000987	1.1151	0.00563636	1.046	0.00188	1.55	1.6508	0	0	0	1	#N/A	0.3534	0.736	2.1485	1.1	0.1375
Tb927.11.5790	hypothetical protein, conserved	ZUnknown	Tb927.11.05790	+	NA	929	-0.0331	0.734	0.5882	0.700508	0.5267	0.244	2.66	1.6492	0	0	0	0	1.0671	0.1838	0.191	1.3385	1	0
Tb927.10.1070	CRK1 cdc2- like protein kinase	Cell.cycle	Tb927.10.01070	-	1965	1099	0.0072	0.94	0.1706	1	0.1693	0.7	2.2	1.6477	0	0	0	0	-0.4745	-0.244	-0.066	-0.4543	1.01	0.0144
Tb927.5.740	hypothetical protein, conserved	ZUnknown	Tb927.05.0740	+	1180	732	-0.5166	6.75e-09	-0.6533	0.134	-0.6633	0.106	1.49	1.6462	0	0	0	0	-2.0182	0.3297	1.014	-1.1212	1.02	0.0286
Tb927.8.7840	dynein heavy chain, putative, not a DHC in Wickstead analysis	Cytoskeleton	Tb927.08.7840	+	3182	1277	-0.7314	3.31e-25	1.1336	0.00151821	0.9868	0.00736	1.74	1.6431	1	0	0	1	0.8766	0.746	0.641	0.5676	1.3	0.3785
Tb927.8.4530	hypothetical protein, conserved	ZUnknown	Tb927.08.4530	-	1705	679	0.1833	0.0516	0.1821	0.968921	0.1918	0.634	1.59	1.6415	0	0	0	0	-1.3209	-0.2409	-0.256	-0.3941	1.05	0.0704
Tb927.3.4360	40S ribosomal protein S15A	Ribosome	Tb927.03.4360	-	NA	5358	-0.0588	0.37	-0.3086	0.44227	-0.3244	0.704	1.56	1.64	0	0	0	0	#N/A	#N/A	0.743	-0.8003	1.02	0.0286
Tb927.1.580	phosphate-repressible phosphate permease, putative	Ions	Tb927.01.0580	-	2537	3842	0.4185	3.68e-16	0.2491	0.867427	0.2835	0.484	1.17	1.6385	0	0	0	0	-1.4958	0.8445	0.603	-0.9371	1.04	0.0566
Tb927.11.13650	cytochrome b5, putative (CYB5)	Mito.e.transport	Tb927.11.13650	-	NA	440	0.6673	5.67e-09	0.0806	1	0.1041	0.999	2.09	1.6385	0	1	0	0	-1.3804	0.4072	-0.212	-1.1031	0.96	-0.0589
Tb927.11.16300	hypothetical protein, conserved	ZUnknown	Tb927.11.16300	-	NA	668	0.3317	0.000246	-0.0408	1	-0.0682	0.999	1.15	1.6338	0	0	0	0	-2.6778	-0.226	0.73	-0.5719	0.99	-0.0145
Tb927.1.1750	conserved protein, unknown function	ZUnknown	Tb927.01.1750	+	1457	1033	-0.0538	0.531	0.2439	1	0.2421	0.999	2.01	1.6323	0	0	0	0	0.0259	0.4944	-0.042	0.5214	1.14	0.189
Tb927.7.1590	mitotic cyclin,cyclin CycB3 (CYC8)	Cell.cycle	Tb927.07.1590	+	3559	1594	0.1362	0.071	0.6254	0.0776541	0.6186	0.0228	2.37	1.6307	0	0	0	0	1.2254	0.0141	-0.117	-0.1449	1.12	0.1635
Tb927.3.3620	hypothetical protein, conserved	ZUnknown	Tb927.03.3620	+	1483	499	0.0822	0.488	0.0724	1	0.0442	0.999	1.96	1.6292	0	0	0	0	-0.7536	0.154	-0.232	0.2741	1.12	0.1635
Tb927.11.16710	hypothetical protein, conserved	ZUnknown	Tb927.11.16710	-	NA	296	0.6535	5.42e-07	-0.1017	1	-0.1329	0.98	2.21	1.6276	0	1	0	0	-2.6075	-0.0359	0.576	-1.0619	1.32	0.4005
Tb927.3.2480	Arv1-like family, putative	ZUnknown	Tb927.03.2480	+	2556	908	0.3272	4.85e-05	0.0747	1	0.0436	0.999	1.96	1.6276	0	0	0	0	1.3135	-0.0818	-0.061	0.7478	1	0
Tb927.9.2800	hypothetical protein, conserved	ZUnknown	Tb927.09.02800	-	NA	1305	-0.3128	1.09e-05	-0.4272	0.248342	-0.4984	0.108	1.82	1.626	0	0	0	0	0.8418	-1.391	-1.521	-0.1499	1.05	0.0704
Tb927.11.430	hypothetical protein, conserved	ZUnknown	Tb927.11.00430	-	NA	742	0.1618	0.0838	0.0577	1	0.0426	0.999	1.76	1.6245	0	0	0	0	-0.6108	-0.2553	-0.132	0.0673	0.97	-0.0439
Tb927.9.12500	POMP7	Mito.membrane	Tb927.09.12500	+	NA	851	0.2858	0.000603	-0.5321	0.930113	-0.5211	0.904	1.8	1.6229	0	0	0	0	-0.9222	-0.2645	0.608	-0.9486	1.17	0.2265
Tb927.8.2480	3-oxo-5-alpha-steroid 4-dehydrogenase-like, putative	Sterols	Tb927.08.2480	+	1715	984	0.0705	0.478	0.1496	1	0.123	0.979	1.67	1.6229	0	0	0	0	0.8995	-0.1838	-0.759	-0.6148	1.06	0.0841
Tb927.8.2400	hypothetical protein, conserved	ZUnknown	Tb927.08.2400	+	1748	503	0.0588	0.647	0.1595	0.918188	0.1616	0.866	1.84	1.6229	0	0	0	0	0.1897	-0.2175	0.158	-0.2002	0.92	-0.1203
Tb927.3.5190	hypothetical protein, conserved	ZUnknown	Tb927.03.5190	+	2126	940	0.5669	1.92e-13	0.0492	1	0.0314	0.999	1.41	1.6214	0	0	0	0	-0.4668	0.4423	0.48	0.2256	1.2	0.263
Tb927.10.8770	TBC-Q1, likely GAP, in Tc vacuolar proteome	Signalling	Tb927.10.08770	+	2074	1608	0.1435	0.0418	0.1601	1	0.1694	0.891	1.93	1.6198	0	0	0	0	0.1788	0.2939	0.374	0.61	0.95	-0.074
Tb927.7.4850	KKT5 Kinetochore protein	Cell.cycle	Tb927.07.4850	-	1024	546	0.2479	0.0151	0.0864	1	0.0277	0.999	1.39	1.612	0	0	0	0	0.4863	-0.18	-0.162	0.0302	0.99	-0.0145
Tb927.8.2780	RBP10	RNA.binding	Tb927.08.2780	+	6392	3642	-0.0301	0.634	3.2501	2.19464e-17	3.1533	2.55e-12	1.65	1.6057	0	0	0	1	2.3768	0.6601	0.188	2.3879	1.02	0.0286
Tb927.3.5130	exonuclease, putative	ZUnknown	Tb927.03.5130	+	2274	797	-0.4755	2.04e-07	-0.1751	1	-0.2774	0.632	2.13	1.6025	0	0	0	0	-0.7341	-0.1527	0.957	-0.301	1.29	0.3674
Tb927.11.15980	hypothetical protein, conserved	ZUnknown	Tb927.11.15980	-	NA	1777	0.1861	0.00306	0.0025	1	0.0236	0.999	2.6	1.6009	0	0	0	0	0.7995	-0.0865	0.006	0.0553	1.05	0.0704
Tb927.11.16170	hypothetical protein, conserved, signal peptide	ZUnknown	Tb927.11.16170	-	NA	397	1.1768	7.11e-24	0.7539	0.00285463	0.7044	0.00485	0.96	1.5961	0	1	0	1	-0.1697	-0.4843	-1.295	-1.2397	1.07	0.0976
Tb927.4.4520	hypothical CSD protein , polyP and Q in middle	ZUnknown	Tb927.04.4520	-	4881	1783	0.2784	0.000402	2.6966	1.0408e-14	2.7124	4.42e-11	1.02	1.5945	0	0	0	1	1.587	0.1068	0.232	1.6696	1.31	0.3896
Tb927.2.4150	hypothetical protein, conserved	ZUnknown	Tb927.02.4150	-	1399	694	-0.478	2.65e-08	-0.0475	1	-0.0714	0.999	2.34	1.5945	0	0	0	0	2.2319	0.0829	0.222	0.8369	1.04	0.0566
Tb927.9.10630	hypothetical protein, conserved	ZUnknown	Tb927.09.10630	-	NA	934	-0.2202	0.0166	0.4508	0.624771	0.4469	0.78	1.06	1.5945	0	0	0	0	-0.5861	0.8943	0.382	-0.0073	1.03	0.0426
Tb927.9.12690	prenyl protein specific carboxyl methyltransferase	Prenylation	Tb927.09.12690	+	NA	499	0.3306	0.00226	0.7319	0.197472	0.5394	0.194	2.02	1.593	0	0	0	0	0.8403	-0.2882	0.011	-0.042	1.68	0.7485
Tb927.10.4440	TbSAP	RNA.synthesis	Tb927.10.04440	-	1343	1259	0.2472	0.00134	-0.0047	1	-0.0518	0.999	1.59	1.5866	0	0	0	0	-0.0544	0.164	-0.399	1.2111	1.14	0.189
Tb927.4.2590	hypothetical protein, conserved	ZUnknown	Tb927.04.2590	+	5456	1548	0.1534	0.0326	0.5031	0.727937	0.4117	0.602	1.92	1.5834	0	0	0	0	0.4113	0.7369	0.043	0.159	1.19	0.251
Tb927.9.8030	hypothetical protein, conserved	ZUnknown	Tb927.09.08030	-	NA	835	0.776	1.98e-21	0.8459	0.14982	0.8245	0.0107	1.47	1.5818	0	1	0	0	0.3175	0.8241	1.451	0.6481	0.97	-0.0439
Tb927.10.7300	hypothetical protein, conserved	ZUnknown	Tb927.10.07300	-	2087	1711	-0.1861	0.0151	0.8399	0.0589254	0.8055	0.034	1.41	1.5785	0	0	0	0	1.089	-0.4132	-0.277	1.6639	1.15	0.2016
Tb927.8.6590	Outer mitochondrial membrane transport complex protein/Glutathione S-transferase, C-terminal domain containing protein, putative	ZUnknown	Tb927.08.6590	-	2158	1058	-0.4872	3.99e-11	0.4202	0.833539	0.2239	0.879	1.46	1.5769	0	0	0	0	1.2353	0.2106	-0.016	1.5914	1.23	0.2987
Tb927.7.3150	CRAL/TRIO domain containing protein, putative	ZUnknown	Tb927.07.3150	+	3389	1031	0.4868	3.9e-10	1.2599	2.60882e-05	1.1932	7.15e-07	1.5	1.5753	0	0	0	1	0.5477	1.0353	0.899	0.1221	0.91	-0.1361
Tb927.3.2460	hypothetical protein, conserved	ZUnknown	Tb927.03.2460	+	1088	730	0.5629	8.87e-11	0.279	0.979636	0.217	0.874	1.73	1.5688	0	0	0	0	0.767	0.8047	0.685	0.2098	1.19	0.251
Tb927.5.4350	NUDIX hydrolase, putative	Enzyme	Tb927.05.4350	-	1611	1057	0.8629	9.27e-28	1.4156	6.84596e-05	1.3565	0.0012	1.75	1.5688	0	1	0	1	0.43	0.0241	-0.229	0.527	1.1	0.1375
Tb927.9.4310	tricarboxylate carrier, putative	Mito.membrane	Tb927.09.04310	+	NA	1391	1.332	6.07e-94	2.3379	8.15739e-73	1.6823	4.75e-21	1.12	1.5672	0	1	0	1	-2.1336	-0.0182	0.096	-1.7509	1.8	0.848
Tb927.3.4160	XPC-binding domain/UBA/TS-N domain containing protein, putative	ZUnknown	Tb927.03.4160	-	1419	1360	-0.2796	0.000178	-0.112	1	-0.1256	0.999	2.11	1.5672	0	0	0	0	-0.7204	0.4861	0.39	-0.6005	1.06	0.0841
Tb927.10.12000	iron-sulfur cluster assembly protein, ISD11, needed foraconitatase, fumarase & thiolation of mitochodrial and cytosolic tRNA	Mito.pathway	Tb927.10.12000	+	1159	600	0.1631	0.121	-0.1222	1	-0.115	0.965	1.27	1.5607	0	0	0	0	-0.2156	0.1179	0.058	-0.8758	1.02	0.0286
Tb927.4.4790	hypothetical protein, conserved	ZUnknown	Tb927.04.4790	-	961	726	0.027	0.814	1.6863	5.65013e-13	1.6847	1.13e-14	1.56	1.5591	0	0	0	1	1.5987	0.8665	-0.005	1.7503	0.86	-0.2176
Tb927.3.3290	protein kinase, putative	Protein.kinase	Tb927.03.3290	-	1982	1035	-0.0146	0.888	-0.1454	1	-0.1549	0.85	1.66	1.5558	0	0	0	0	-0.2496	0.3075	0.064	0.2969	0.94	-0.0893
Tb927.11.1580	hypothetical protein, conserved	ZUnknown	Tb927.11.01580	-	NA	1544	0.147	0.0357	0.2855	1	0.2782	0.898	1.15	1.5542	0	0	0	0	1.014	0.1101	0.719	0.6013	1.05	0.0704
Tb927.9.12150	transport protein particle (TRAPP) subunit, putative	Vesicular.transport	Tb927.09.12150	+	NA	1025	0.082	0.372	-0.2788	0.481778	-0.2662	0.285	1.84	1.5509	0	0	0	0	-0.4535	-0.4674	-0.296	0.1265	1.16	0.2141
Tb927.8.2330	hypothetical protein, conserved	ZUnknown	Tb927.08.2330	+	1947	696	0.1603	0.0813	-0.2543	0.589763	-0.2511	0.304	1.94	1.5493	0	0	0	0	-1.0965	0.1653	0.377	-1.2893	1.15	0.2016
Tb927.7.4410	hypothetical protein, conserved	ZUnknown	Tb927.07.4410	-	3386	1004	0.2522	0.00118	0.5341	0.887312	0.5427	0.38	1.89	1.5476	0	0	0	0	1.2489	0.6406	0.199	0.5771	1.14	0.189
Tb927.8.4690	hypothetical protein, conserved, no homologues	ZUnknown	Tb927.08.4690	-	1173	389	-0.124	0.338	0.0921	1	0.1973	0.965	1.35	1.546	0	0	0	0	0.3527	-0.2166	0.487	0.0372	0.86	-0.2176
Tb927.3.5260	hypothetical protein, conserved	ZUnknown	Tb927.03.5260	+	1906	1262	-0.1183	0.117	0.1386	1	0.1024	0.999	1.67	1.5427	0	0	0	0	0.403	0.073	-0.09	0.5382	1.19	0.251
Tb927.8.3360	hypothetical protein, conserved	ZUnknown	Tb927.08.3360	+	720	292	-0.6619	5.08e-07	-0.3934	0.491165	-0.4493	0.0535	1.62	1.541	1	0	0	0	0.1693	-0.6446	-0.157	0.8553	1.06	0.0841
Tb927.10.2660	hypothetical protein, conserved	ZUnknown	Tb927.10.02660	+	1380	749	0.199	0.0288	0.0613	1	0.07	0.999	2	1.5344	0	0	0	0	0.1303	0.0966	0.942	-0.1393	1.05	0.0704
Tb927.10.7040	hypothetical protein, conserved	ZUnknown	Tb927.10.07040	+	2324	951	0.5993	1.27e-14	0.4333	1	0.4102	0.932	1.2	1.5294	0	1	0	0	-0.7918	0.3209	0.406	0.3373	0.95	-0.074
Tb927.6.5000	Protein of unknown function (DUF773), putative	ZUnknown	Tb927.06.5000	+	1327	1174	-0.0876	0.335	-0.1388	0.870225	-0.1218	0.943	1.71	1.5261	0	0	0	0	-0.8141	-0.2681	0.35	0.194	0.98	-0.0291
Tb927.11.11970	hypothetical protein	ZUnknown	Tb927.11.11970	+	NA	323	0.1377	0.322	-0.0076	1	0.1575	0.943	1.47	1.5261	0	0	0	0	0.0627	0.1746	-0.081	0.6906	0.98	-0.0291
Tb927.5.1450	GRESAG 4, putative receptor-type adenylate cyclase	GRESAG	Tb927.05.1450	-	3808	1767	0.243	0.000346	0.6401	0.149284	0.629	0.035	0.95	1.5261	0	0	0	0	2.0435	1.2743	0.01	0.0917	0.96	-0.0589
Tb927.10.9270	emp24/gp25L/p24 family/GOLD, putative	Vesicular.transport	Tb927.10.09270	+	843	498	0.0319	0.817	0.4058	0.796008	0.3964	0.073	2.41	1.5261	0	0	0	0	-0.9488	-0.2879	0.273	-0.0518	0.94	-0.0893
Tb927.5.1840	hypothetical protein, conserved	ZUnknown	Tb927.05.1840	+	666	688	-0.4723	1.13e-07	-0.4338	0.125258	-0.4731	0.169	1.38	1.5227	0	0	0	0	0.0627	-0.034	0.417	0.0876	0.96	-0.0589
Tb927.4.2520	NAD dependent deacetylase SIR2RP3	ZUnknown	Tb927.04.2520	+	936	803	-0.2623	0.0019	-0.059	1	-0.0823	0.999	1.52	1.5194	0	0	0	0	0.2977	-0.5388	-0.285	0.5598	1.04	0.0566
Tb927.6.3640	zinc finger of C3HC4-type, RING/B-box zinc finger, putative	Zinc.finger	Tb927.06.3640	-	2808	1864	-0.4859	7.69e-14	0.0909	1	0.0682	0.999	1.69	1.5143	0	0	0	0	0.8285	-0.0069	-0.049	1.2566	1.24	0.3103
Tb927.4.500	FHA domain containing protein, putative	ZUnknown	Tb927.04.0500	-	1336	722	-0.244	0.00485	0.0997	1	0.0855	0.999	1.35	1.5143	0	0	0	0	0.581	1.3094	-0.718	2.0629	1.05	0.0704
Tb927.8.7830	hypothetical protein, conserved	ZUnknown	Tb927.08.7830	+	5643	1984	-1.1936	5.96e-78	0.4104	0.859817	0.3712	0.831	1.07	1.5126	1	0	0	0	0.5272	0.7827	0.171	0.14	1.19	0.251
Tb927.11.5960	hypothetical protein, conserved, no domains, no yeast or human match	ZUnknown	Tb927.11.05960	-	NA	7459	-0.2004	7.08e-05	0.2363	0.518655	0.2576	0.78	1.25	1.5126	0	0	0	0	-0.8928	-0.6488	0.144	-0.6532	0.95	-0.074
Tb927.11.3920	hypothetical protein, conserved	ZUnknown	Tb927.11.03920	+	NA	3080	0.0603	0.318	0.2203	1	0.2269	0.99	1.9	1.5076	0	0	0	0	1.5825	0.6688	-0.04	0.7167	1.05	0.0704
Tb927.10.10670	kinetoplastid-specific dual specificity phosphatase, putative	Phosphatase	Tb927.10.10670	-	1451	479	0.1932	0.0851	0.7249	0.0588968	0.9539	4.16e-11	0.98	1.5076	0	0	0	0	-1.2645	0.06	0.244	1.5234	1.01	0.0144
Tb927.4.790	hypothetical protein, conserved	ZUnknown	Tb927.04.0790	-	1087	583	-0.322	0.00414	-0.106	1	-0.0847	0.999	2.27	1.5059	0	0	0	0	-0.4375	0.2315	0.304	0.7906	1.12	0.1635
Tb927.10.7850	protein-L-isoaspartate O-methyl transferase, putative	Enzyme	Tb927.10.07850	-	2051	653	0.4778	2.25e-07	-0.07	1	-0.0997	0.999	1.58	1.5042	0	0	0	0	-0.0793	0.1287	0.786	1.0664	1.13	0.1763
Tb927.1.4970	hypothetical protein	ZUnknown	Tb927.01.4970	+	477	87	0.026	0.93	-0.383	1	-0.2116	0.982	1.95	1.5025	0	0	0	0	-0.2763	0.5841	1.014	0.4153	1.06	0.0841
Tb927.5.810	ZC3H11	RNA.binding	Tb927.05.0810	+	3468	10068	-0.3268	8.18e-12	0.8127	0.135762	0.7845	0.216	2.19	1.5008	0	0	0	0	1.0113	2.062	2.019	0.3479	1.12	0.1635
Tb927.9.13510	PARN-3	RNA.degradation	Tb927.09.13510	-	NA	2900	0.0057	0.936	0.5113	0.76468	0.4554	0.809	1.13	1.4991	0	0	0	0	0.2114	0.5572	-0.008	0.2844	1.17	0.2265
Tb927.4.4990	ubiquinol-cytochrome c reductase, putative	Mito.e.transport	Tb927.04.4990	-	296	556	0.5219	1.89e-06	0.1721	0.998014	0.0975	0.999	0.84	1.4974	0	0	0	0	-2.492	0.0776	0.176	-2.0555	1.05	0.0704
Tb927.11.10910	40S ribosomal protein SA	Ribosome	Tb927.11.10910	+	NA	24478	-0.199	9.26e-08	-0.226	0.807173	-0.2291	0.98	1.84	1.4974	0	0	0	0	-0.237	-0.1716	0.676	-1.0127	1.03	0.0426
Tb927.4.2220	TPR-repeat-containing chaperone protein DNAJ, putative	Chaperone	Tb927.04.2220	+	4116	3413	0.1132	0.0467	0.086	1	0.0975	0.999	1.38	1.4974	0	0	0	0	0.4979	0.8689	0.236	0.2948	0.98	-0.0291
Tb927.3.5250	ZC3H8	RNA.binding	Tb927.03.5250	+	1979	2819	-0.1499	0.0179	3.7128	1.34698e-30	3.4943	4.38e-18	1.31	1.4957	0	0	0	1	1.068	1.0304	0.207	1.0735	1.26	0.3334
Tb927.3.2380	hypothetical protein, conserved	ZUnknown	Tb927.03.2380	+	377	168	-0.0733	0.73	0.301	0.930113	0.3027	0.914	1.15	1.4957	0	0	0	0	-0.413	0.1054	0.145	0.0203	1.05	0.0704
Tb927.11.9770	hypothetical protein, conserved	ZUnknown	Tb927.11.09770	-	NA	644	-0.1304	0.227	-0.6133	0.739525	-0.5952	0.00153	1.26	1.494	0	0	0	0	-0.7464	0.4187	0.104	0.3568	1.09	0.1243
Tb927.9.15650	hypothetical protein	ZUnknown	Tb927.09.15650	+	NA	1248	-0.0004	0.996	-0.2966	0.830009	-0.294	0.401	1.65	1.494	0	0	0	0	1.3313	-0.2213	-0.315	1.9148	1.07	0.0976
Tb927.11.5540	emp24/gp25L/p24 family/GOLD, putative	Vesicular.transport	Tb927.11.05540	+	NA	757	0.3745	3.15e-05	0.6432	0.369703	0.6161	0.181	2.32	1.494	0	0	0	0	-0.0212	0.1458	0.086	0.7554	0.98	-0.0291
Tb927.5.3790	Tetraspanin family, putative	ZUnknown	Tb927.05.3790	+	2838	1298	-0.1255	0.173	0.492	0.893714	0.4808	0.677	2.22	1.4923	0	0	0	0	1.5	0.4313	0.1	0.9873	1.11	0.1506
Tb927.4.3770	protein kinase, putative	Protein.kinase	Tb927.04.3770	-	2993	2573	-1.4856	3.61e-107	0.9627	0.0335445	0.9794	0.0583	1.06	1.4889	1	0	0	1	-0.4555	1.3762	0.533	1.0833	0.99	-0.0145
Tb927.1.840	transmembrane protein, putative	Mito.pathway	Tb927.01.0840	-	911	605	0.1604	0.104	-0.0865	1	-0.0786	0.999	1.49	1.4837	0	0	0	0	-0.8307	0.1564	0.56	-0.181	1.26	0.3334
Tb927.8.5270	hypothetical protein, conserved	ZUnknown	Tb927.08.5270	+	874	716	0.1594	0.0925	0.3898	0.675845	0.4025	0.483	1.72	1.4803	0	0	0	0	0.1341	0.4459	-0.015	1.993	1.02	0.0286
Tb927.3.4710	hypothetical protein, conserved	ZUnknown	Tb927.03.4710	-	2522	2136	0.1718	0.00585	0.4538	0.969565	0.3714	0.926	2.03	1.4751	0	0	0	0	1.0188	0.8853	0.485	1.0722	1.17	0.2265
Tb927.1.1840	conserved protein, unknown function	ZUnknown	Tb927.01.1840	+	4632	1263	-0.3163	6.8e-05	0.2439	1	0.2777	0.967	2.07	1.4751	0	0	0	0	-0.2635	0.9225	0.609	0.6486	1.13	0.1763
Tb927.10.7220	hypothetical protein, conserved	ZUnknown	Tb927.10.07220	-	1432	692	0.2824	0.00173	-0.0175	1	-0.0308	0.999	0.91	1.4734	0	0	0	0	-1.2638	0.1084	1.047	-0.4953	1.01	0.0144
Tb927.5.3690	hypothetical protein, conserved	ZUnknown	Tb927.05.3690	+	1490	421	0.0659	0.622	-0.0322	1	-0.0683	0.999	1.06	1.4734	0	0	0	0	-0.958	-0.1898	0.531	-0.8709	0.95	-0.074
Tb927.11.7000	hypothetical protein, conserved	ZUnknown	Tb927.11.07000	-	NA	338	-0.6554	2.97e-07	1.3609	0.170699	1.0178	0.999	1.03	1.4664	1	0	0	0	#N/A	0.6398	1.271	0.6509	0.91	-0.1361
Tb04.3I12.100	hypothetical protein	ZUnknown	#N/A	#N/A	NA	341	-0.2668	0.0581	1.3454	2.96495e-06	#N/A	#N/A	1.42	1.4647	0	0	0	1	#N/A	#N/A	0.251	1.7711	1.36	0.4436
Tb927.8.880	hypothetical protein	ZUnknown	Tb927.08.0880	-	5596	1666	-0.4718	5.39e-15	-0.5181	0.916171	-0.4872	0.782	2.07	1.4629	0	0	0	0	2.67	0.3033	0.036	0.0553	0.86	-0.2176
Tb927.10.14440	b9 domain-containing protein 1 (b9d1)	ZUnknown	Tb927.10.14440	-	1252	823	0.2141	0.0208	-0.0481	1	-0.0966	0.999	1.21	1.4612	0	0	0	0	-0.8203	-0.0997	-0.109	0.0443	1.01	0.0144
Tb927.5.3530	hypothetical protein, conserved	ZUnknown	Tb927.05.3530	+	2542	583	0.2212	0.0411	0.2333	0.930113	0.2947	0.603	1.03	1.4612	0	0	0	0	-0.489	-0.0478	-0.039	-0.0577	0.94	-0.0893
Tb927.11.1480	GRESAG 4, putative receptor-type adenylate cyclase	GRESAG	#N/A	#N/A	NA	2874	-0.6289	1.09e-28	-1.3399	0.00412792	-1.1199	0.00772	1.28	1.4559	1	0	1	0	1.3786	1.0052	-0.267	-2.0041	1.03	0.0426
Tb927.11.14230	Vps23 core domain containing protein, putative	ZUnknown	Tb927.11.14230	+	NA	1204	-0.1824	0.0254	0.0174	1	0.0149	0.999	2.28	1.4524	0	0	0	0	0.4257	0.1886	0.513	0.2745	1.13	0.1763
Tb927.10.5750	protocatechuate 4,5-dioxygenase-like protein	Enzyme	Tb927.10.05750	-	1418	771	0.2282	0.00896	0.1859	1	0.1324	0.965	1.43	1.4507	0	0	0	0	-0.5953	-0.4082	0.021	-0.409	1.29	0.3674
Tb927.4.4040	hypothetical protein, conserved	Cytoskeleton	Tb927.04.4040	-	1906	2380	-0.5224	2.22e-23	0.2599	1	0.1369	0.999	1.76	1.4507	0	0	0	0	0.0537	-0.5481	-1.181	-0.1705	1.22	0.2869
Tb927.11.15320	hypothetical protein	ZUnknown	Tb927.11.15320	-	NA	1709	0.9124	5.35e-53	1.5547	8.22896e-09	1.4884	7.68e-11	1.08	1.4489	0	1	0	1	-0.0509	1.1367	0.437	0.2378	1.35	0.433
Tb927.10.2280	hypothetical protein, conserved	ZUnknown	Tb927.10.02280	+	3314	1193	-0.0114	0.904	0.6446	0.229808	0.5551	0.0804	1.67	1.4489	0	0	0	0	0.2928	0.0473	-0.099	1.5475	1.29	0.3674
Tb927.6.820	PUF4	RNA.binding	Tb927.06.0820	-	3418	5197	0.562	1.54e-32	4.3159	2.00886e-64	4.0487	4.14e-51	1.08	1.4436	0	0	0	1	0.4255	0.3908	-0.437	0.7757	2.02	1.0144
Tb927.10.8350	hypothetical protein	ZUnknown	Tb927.10.08350	+	858	15	-0.5766	0.335	-0.2918	1	-0.2727	0.999	1.85	1.4436	0	0	0	0	#N/A	0.0153	0.477	0.1749	1.04	0.0566
Tb927.11.8170	MPK8 protein kinase	Protein.kinase	Tb927.11.08170	+	NA	2047	0.0467	0.486	1.046	0.377325	1.0236	0.0625	1.01	1.4401	0	0	0	0	0.9997	0.7388	0.087	1.5242	0.99	-0.0145
Tb927.10.5190	Kinesin associated protein, putative	ZUnknown	Tb927.10.05190	+	1646	1027	0.3412	6.17e-05	0.7512	0.580449	0.2947	0.856	1.77	1.4383	0	0	0	0	-1.1142	0.9263	0.584	-0.276	1.29	0.3674
Tb927.10.3620	Laminin-like protein, putative	ZUnknown	Tb927.10.03620	+	2015	1538	0.2739	2.94e-05	0.6363	0.198858	0.5805	0.107	1.95	1.4383	0	0	0	0	0.6856	0.1618	0.16	2.2919	1.09	0.1243
Tb927.11.520	hypothetical protein, tryp specific	ZUnknown	Tb927.11.00520	-	NA	1242	0.7796	2.88e-31	0.142	1	0.1002	0.999	1.38	1.4365	0	1	0	0	-1.1763	0.1108	0.373	-0.9889	1.32	0.4005
Tb927.11.6990	protein kinase, putative,serine/threonine protein kinase, putative	Protein.kinase	Tb927.11.06990	-	NA	1410	0.1167	0.111	-0.0024	1	-0.0109	0.999	1.72	1.4347	0	0	0	0	0.571	0.7906	1.014	-1.0427	1.18	0.2388
Tb927.3.730	hypothetical protein, conserved	ZUnknown	Tb927.03.0730	-	2073	1303	0.2789	0.000261	0.2766	1	0.2437	0.999	1.58	1.4347	0	0	0	0	0.526	-0.9492	-0.317	0.8363	1.1	0.1375
Tb927.9.11830	hypothetical protein, conserved, resemblance to myosin	ZUnknown	Tb927.09.11830	+	NA	1486	-0.3123	2.08e-06	0.0343	1	0.0548	0.999	1.26	1.4347	0	0	0	0	0.7489	0.7026	0.292	0.4458	0.98	-0.0291
Tb927.7.4200	hypothetical protein, conserved	ZUnknown	Tb927.07.4200	+	1560	686	0.3495	0.000124	0.0591	1	0.0505	0.999	1.69	1.433	0	0	0	0	-1.1737	-0.1613	0.368	-0.1669	1.04	0.0566
Tb927.11.4990	kinetoplastid-specific phospho-protein phosphatase, putative	Protein.phosphatase	Tb927.11.04990	+	NA	1949	0.496	1.38e-14	0.1155	1	0.1313	0.999	1.34	1.433	0	0	0	0	-0.0257	0.6208	0.809	0.2926	0.96	-0.0589
Tb927.11.15720	hypothetical protein	ZUnknown	Tb927.11.15720	-	NA	722	-0.0758	0.47	1.2455	0.00856913	1.3889	0.297	1.16	1.433	0	0	0	1	0.8046	0.9665	0.615	0.5081	0.94	-0.0893
Tb927.3.950	2OG-Fe(II) oxygenase superfamily, putative	Mito.pathway	Tb927.03.0950	+	2373	1080	-0.0769	0.341	0.2023	1	0.1808	0.857	1.72	1.4294	0	0	0	0	-0.6828	0.8001	0.079	-0.5586	1.05	0.0704
Tb927.2.2720	MEKK1 or FlaK protein kinase, putative	Protein.kinase	Tb927.02.2720	+	6458	3838	0.08	0.154	0.8592	0.0414235	0.8005	0.02	1.06	1.4258	0	0	0	1	0.5609	0.9981	-0.042	0.7404	1.49	0.5753
Tb927.3.5080	PSP1 C-terminal conserved region, putative	ZUnknown	Tb927.03.5080	+	4955	2083	0.3472	9.62e-08	1.1169	0.13805	0.8576	0.308	1.65	1.4258	0	0	0	0	1.5308	0.5906	0.157	0.9822	1.42	0.5059
Tb927.10.8570	hypothetical protein, conserved	ZUnknown	Tb927.10.08570	+	1962	1876	-0.068	0.366	0.1167	1	0.0501	0.999	2.05	1.4258	0	0	0	0	0.6962	-0.2779	-0.146	1.1195	1.32	0.4005
Tb927.4.1870	kinetoplastid-specific phospho-protein phosphatase, putative	Protein.phosphatase	Tb927.04.1870	-	4276	2219	-0.0421	0.582	0.4471	0.820034	0.3525	0.901	1.4	1.4222	0	0	0	0	0.5527	0.4838	0.14	0.9337	1.16	0.2141
Tb927.3.2870	multicopper oxidase, putative	ZUnknown	Tb927.03.2870	-	2742	2420	-0.2769	0.000197	-0.2061	1	-0.2082	0.879	1.43	1.4222	0	0	0	0	0.9243	0.1622	-0.229	0.2503	0.96	-0.0589
Tb927.9.1910	hypothetical protein, conserved	ZUnknown	Tb927.09.01910	-	NA	686	0.2583	0.00352	0.1013	1	0.1105	0.999	1.84	1.4168	0	0	0	0	-0.4204	0.4833	0.653	0.4891	1.01	0.0144
Tb927.5.2390	hypothetical protein, conserved	ZUnknown	Tb927.05.2390	+	3248	1379	-0.4355	3.7e-11	1.209	1.6051e-05	1.1617	8.25e-05	1.71	1.4114	0	0	0	1	1.7419	0.1812	-0.138	1.0443	1.39	0.4751
Tb927.11.16720	CYC6 mitotic cyclin	Cell.cycle	Tb927.11.16720	-	NA	2163	-0.1577	0.0105	2.8958	3.42061e-30	2.7634	6.61e-17	2.3	1.406	0	0	0	1	1.0812	0.6207	-0.225	0.3237	1.01	0.0144
Tb927.11.5290	mitochondrial carrier protein, MCP9	Mito.transport	Tb927.11.05290	+	NA	1321	0.5759	1.38e-14	-0.2535	0.810866	-0.2618	0.632	0.94	1.4042	0	0	0	0	-1.2687	-0.0208	0.02	-0.7873	0.99	-0.0145
Tb927.8.3020	hypothetical protein, conserved	ZUnknown	Tb927.08.3020	+	8072	2509	0.3002	2.87e-07	3.16	1.30513e-21	2.2374	2.22e-48	0.82	1.4042	0	0	0	1	0.5292	0.8962	0.433	-0.0074	0.95	-0.074
Tb927.11.16780	hypothetical protein	ZUnknown	Tb927.11.16780	-	NA	1655	0.3216	0.0525	3.492	4.26043e-23	2.8265	4.3e-09	0.83	1.4005	0	0	0	1	0.8445	-0.1508	-0.561	1.0845	2.14	1.0976
Tb927.7.2090	hypothetical protein, conserved, no clear yeast or human matches	ZUnknown	Tb927.07.2090	-	5365	1095	0.0199	0.838	2.0367	2.93597e-05	2.1114	1.2e-06	1.13	1.3987	0	0	0	1	0.357	-0.1359	0.474	2.1091	1.48	0.5656
Tb927.11.12130	hypothetical protein	ZUnknown	#N/A	#N/A	NA	305	-1.0105	0.00491	1.1875	0.467665	1.9121	0.00267	0.91	1.3987	1	0	0	0	1.7502	0.0568	0.014	2.4949	0.72	-0.4739
Tb927.9.3750	hypothetical protein, conserved	ZUnknown	Tb927.09.03750	+	NA	394	0.0642	0.653	0.1302	1	0.1885	0.891	1.31	1.3969	0	0	0	0	-0.057	-0.4405	-0.266	0.2979	1.11	0.1506
Tb927.11.7820	endonuclease/exonuclease/phosphatase, putative	DNA	Tb927.11.07820	-	NA	2213	-0.919	7.35e-66	2.6079	6.39242e-25	2.7673	1.12e-24	0.95	1.3969	1	0	0	1	0.6851	-0.1424	-0.715	1.0917	0.46	-1.1203
Tb927.9.10950	chaperone DNAj, putative, J43	Chaperone	Tb927.09.10950	-	NA	1770	0.9731	3.46e-61	2.2025	4.71368e-07	1.6985	2.32e-05	1.35	1.3951	0	1	0	1	0.5738	0.0219	-0.229	-0.1257	1.55	0.6323
Tb927.5.4540	GRESAG 4, putative receptor-type adenylate cyclase	GRESAG	Tb927.05.4540	+	7751	4078	-0.0024	0.978	0.191	1	0.1387	0.999	1.03	1.3951	0	0	0	0	0.0393	0.494	-0.561	0.6158	1.09	0.1243
Tb927.4.3500	Amastin surface glycoprotein, putative	Membrane.protein	Tb927.04.3500	-	1172	550	0.4009	3.11e-05	0.1953	0.98218	0.1922	0.901	1.39	1.3951	0	0	0	0	-3.1579	0.4081	1.107	-1.3388	1.04	0.0566
Tb927.4.3170	hypothetical protein, conserved	ZUnknown	Tb927.04.3170	+	4027	2846	0.6498	1.22e-30	1.1679	8.47112e-07	1.0192	2.91e-06	1.09	1.3932	0	1	0	1	1.1596	0.4249	0.347	0.8694	1.58	0.6599
Tb927.6.2850	ESAG8-associated protein, putative (PIE8)	ESAG	Tb927.06.2850	+	2486	2213	-0.1492	0.0371	2.1172	1.26207e-05	2.1044	1.18e-05	1.68	1.3932	0	0	0	1	0.0741	0.3242	-0.418	-0.7312	1.04	0.0566
Tb927.7.860	hypothetical protein, conserved	ZUnknown	Tb927.07.0860	-	4139	1456	0.2859	6.1e-05	-0.1332	1	-0.1181	0.999	1.13	1.3896	0	0	0	0	0.4992	0.4065	1.362	-1.008	1.11	0.1506
Tb927.7.6720	hypothetical protein, conserved	ZUnknown	Tb927.07.6720	-	1640	1183	0.1586	0.0688	1.039	0.0231676	1.0295	0.00546	1.2	1.3896	0	0	0	1	-0.0761	0.3015	-0.039	0.1528	1.06	0.0841
Tb927.5.1600	hypothetical protein, conserved	ZUnknown	Tb927.05.1600	+	2818	1495	-0.1583	0.02	0.3392	0.527361	0.3163	0.625	1.99	1.3877	0	0	0	0	1.2556	0.9658	0.465	0.2447	1.24	0.3103
Tb927.3.960	protein transport protein Sec61 gamma subunit, putative	Vesicular.transport	Tb927.03.0960	+	841	1311	-0.1506	0.0476	0.0624	1	0.0768	0.999	0.97	1.3877	0	0	0	0	0.8243	-0.4638	0.065	-0.2145	0.97	-0.0439
Tb927.11.10140	hypothetical protein, possible component of cytochorome oxidase complex	Mito.e.transport	Tb927.11.10140	+	NA	527	0.1486	0.162	-0.2189	0.821813	-0.2206	0.642	1.43	1.3859	0	0	0	0	-2.4483	-0.0301	0.693	-1.2283	0.97	-0.0439
Tb927.9.5710	TFIIB general transcription factor IIB	RNA.synthesis	Tb927.09.05710	+	NA	973	-0.0823	0.362	-0.1223	1	-0.0482	0.999	1.93	1.3859	0	0	0	0	-0.0736	-0.3698	0	-0.1992	0.85	-0.2345
Tb927.2.4670	hypothetical protein, conserved	ZUnknown	Tb927.02.4670	-	1164	836	0.2053	0.0402	0.3725	0.979636	0.3347	0.98	1.2	1.384	0	0	0	0	0.9782	0.6114	0.373	1.0498	0.95	-0.074
Tb927.11.12000	hypothetical protein, conserved	ZUnknown	Tb927.11.12000	-	NA	103	0.4946	0.0265	-0.069	1	-0.0785	0.999	1.77	1.3804	0	0	0	0	1.0442	0.3768	1.311	1.2078	1.25	0.3219
Tb927.4.2680	Zeta toxin, putative	ZUnknown	Tb927.04.2680	+	2977	2110	-0.576	4.06e-25	-0.1463	1	-0.1196	0.999	1.27	1.3804	0	0	0	0	-0.2195	0.2558	-0.079	-0.217	1.02	0.0286
Tb927.7.6320	BTB/POZ domain/Regulator of chromosome condensation (RCC1) repeat, putative	ZUnknown	Tb927.07.6320	-	2887	1458	0.251	0.000239	0.7421	0.465431	0.6612	0.253	1.16	1.3804	0	0	0	0	0.2691	0.8937	0.191	0.4565	0.93	-0.1047
Tb927.11.14070	RDK1 protein kinase	Protein.kinase	Tb927.11.14070	+	NA	4623	0.1029	0.0331	2.502	3.15486e-14	2.4776	4.15e-13	0.83	1.3785	0	0	0	1	1.7008	0.9336	0.302	1.7983	1.2	0.263
Tb927.2.1790	hypothetical protein, conserved	ZUnknown	Tb927.02.1790	+	522	368	0.2307	0.128	-0.0109	1	-0.0197	0.999	1.61	1.3785	0	0	0	0	-0.5726	0.0446	0.485	-0.2418	1.09	0.1243
Tb927.11.7810	hypothetical protein	ZUnknown	Tb927.11.07810	-	NA	1253	-0.4491	2.2e-07	2.9474	7.31217e-12	3.6336	1.33e-11	1.07	1.3785	0	0	0	1	0.9448	-0.3015	0.088	1.0404	0.54	-0.889
Tb927.9.14120	NIF superfamily phosphatase domain, possible splicing factor	RNA.processing	Tb927.09.14120	-	NA	2225	0.4718	2.45e-18	1.1455	1.59015e-05	1.1167	5.73e-05	1.11	1.3767	0	0	0	1	0.3132	0.2908	0.172	0.6143	1.04	0.0566
Tb927.9.10930	MED7 mediator of rna polymerase ii transcription subunit 7	RNA.synthesis	Tb927.09.10930	-	NA	285	0.0545	0.754	0.311	1	0.3346	0.999	1.27	1.3767	0	0	0	0	0.7758	-0.5111	-0.329	0.8494	0.94	-0.0893
Tb927.6.4140	paraflagellar rod protein PFC4	Cytoskeleton	Tb927.06.4140	-	622	4237	-0.7809	3.61e-44	-0.2809	1	-0.2748	0.999	0.55	1.3748	1	0	0	0	-0.8649	-0.2971	0.022	-1.3391	1.02	0.0286
Tb927.3.1910	SLBP1, histone RNA binding domain 259-326	RNA.binding	Tb927.03.1910	-	6571	2236	0.1546	0.0098	2.1771	5.79126e-18	2.0041	1.31e-13	1.12	1.3674	0	0	0	1	1.306	0.3597	-0.215	1.0954	1.16	0.2141
Tb927.6.1520	Aquaglyceroporin 1	Transporter	Tb927.06.1520	-	1324	2488	-0.2783	0.000477	-0.0384	1	-0.0364	0.999	1.22	1.3674	0	0	0	0	-2.9155	1.5382	0.581	-1.5057	1.03	0.0426
Tb927.6.3600	LSU ribosomal protein, mitochondrial, putative	Mito.translation	Tb927.06.3600	-	1671	1283	-0.2851	0.000133	-0.3106	0.435328	-0.308	0.195	1.3	1.3655	0	0	0	0	-1.3248	-0.036	0.653	-1.0848	1.09	0.1243
Tb927.11.11110	NEK20 protein kinase	Protein.kinase	Tb927.11.11110	+	NA	485	0.1338	0.258	0.0742	1	0.0855	0.999	1.02	1.3636	0	0	0	0	0.3765	0.2513	1.301	-0.0553	1.5	0.585
Tb927.10.8950	kinetoplast DNA-associated protein, putative	Mito.DNA	Tb927.10.08950	+	404	1114	0.198	0.0181	0.4712	0.854116	-0.0194	0.999	0.67	1.3636	0	0	0	0	-0.3052	-0.4411	-0.929	-0.2569	0.99	-0.0145
Tb927.6.1100	hypothetical protein, conserved, no domains, kinetoplastid specific	ZUnknown	Tb927.06.1100	-	2785	1084	0.509	6.82e-13	0.2583	0.963148	0.2449	0.802	2.2	1.3618	0	0	0	0	0.2085	0.8934	0.326	1.0012	1.1	0.1375
Tb927.9.13570	hypothetical protein, conserved	ZUnknown	Tb927.09.13570	-	NA	1021	0.0096	0.929	-0.2988	1	-0.3156	0.901	1.2	1.3618	0	0	0	0	-0.3594	0.1722	1.296	-0.9207	0.93	-0.1047
Tb927.4.5190	hypothetical protein, conserved	ZUnknown	Tb927.04.5190	-	1501	257	0.2665	0.0955	-0.1071	1	-0.0614	0.999	1.63	1.3599	0	0	0	0	0.2834	-0.1186	0.762	-0.8824	0.8	-0.3219
Tb927.1.2310	hypothetical protein	ZUnknown	Tb927.01.2310	+	680	913	-1.6155	3.14e-15	-1.0515	0.174116	-1.0316	0.196	2.14	1.358	1	0	0	0	-2.6163	-0.5746	-0.075	-1.2803	1.03	0.0426
Tb927.11.5340	protein kinase, putative	Protein.kinase	Tb927.11.05340	+	NA	1556	0.1225	0.112	0.2691	1	0.2596	0.999	1.88	1.3561	0	0	0	0	0.9409	-0.1791	-0.259	0.0733	1.05	0.0704
Tb927.8.3850	PSP1 C-terminal conserved region, putative	ZUnknown	Tb927.08.3850	-	3241	1409	-0.111	0.157	0.7405	0.268453	0.6041	0.292	2.14	1.3524	0	0	0	0	0.6166	0.2657	0.531	0.4512	1.19	0.251
Tb927.9.11660	hypothetical protein, conserved	ZUnknown	Tb927.09.11660	+	NA	1167	0.192	0.0182	0.0866	1	0.044	0.999	1.56	1.3524	0	0	0	0	-0.6066	0.0171	-0.213	-0.3416	1.01	0.0144
Tb927.6.5010	hypothetical protein, conserved	ZUnknown	Tb927.06.5010	+	2008	2179	-0.0111	0.887	0.5885	0.895642	0.5771	0.821	1.8	1.3486	0	0	0	0	0.4228	0.4228	0.17	1.2272	0.57	-0.811
Tb927.11.12120	RBP9	RNA.binding	Tb927.11.12120	+	NA	2068	0.2345	0.000958	2.6184	3.34282e-15	2.458	2.48e-10	2.12	1.3467	0	0	0	1	1.3567	-0.2654	-0.171	3.393	0.9	-0.152
Tb927.2.4680	hypothetical protein, conserved	ZUnknown	Tb927.02.4680	-	1300	749	0.3474	0.000301	0.0835	1	0.0967	0.999	1.58	1.341	0	0	0	0	0.4134	0.4699	0.941	-0.0546	1.08	0.111
Tb927.11.2730	UDP-galactose 4-epimerase GALE	Glycans	Tb927.11.02730	-	NA	1933	-0.1467	0.0173	0.7805	0.0231676	0.6416	0.000882	1.15	1.3391	0	0	0	1	0.2635	0.3103	0.014	0.4143	1.27	0.3448
Tb927.9.2140	protein kinase, putative	Protein.kinase	Tb927.09.02140	-	NA	3242	0.2292	8.18e-06	0.4179	0.353478	0.3588	0.235	1.32	1.3391	0	0	0	0	0.5503	0.8537	0.513	1.2191	1.24	0.3103
Tb927.10.5870	FAZ25	Cytoskeleton	Tb927.10.05870	-	2173	1019	-0.0251	0.802	0.057	1	0.0509	0.999	1.84	1.3391	0	0	0	0	0.274	0.2372	-0.357	-0.2864	1.04	0.0566
Tb927.9.8450	adenylate, cytidylate and uridylate kinase (ADKG)	Nucleotides	Tb927.09.08450	-	NA	1090	-0.1797	0.0162	0.298	0.856	0.2771	0.814	1.04	1.3391	0	0	0	0	-0.9271	-0.186	-0.328	-0.8494	0.97	-0.0439
Tb927.2.4720	dolichyl-P-Man:GDP-Man7GlcNAc2-PP-dolichyl alpha-1,6-mannosyltransferase, putative	Glycans	Tb927.02.4720	-	4773	1292	-0.5548	1.38e-15	0.1847	1	0.3071	0.617	0.88	1.3391	0	0	0	0	0.156	0.014	0.34	0.3881	0.8	-0.3219
Tb927.8.7810	hypothetical protein, conserved	ZUnknown	Tb927.08.7810	+	1551	237	-1.2086	2.37e-18	-0.0224	1	-0.0021	0.999	1.09	1.3372	1	0	0	0	-1.3132	0.0754	0.778	0.4419	1.17	0.2265
Tb927.2.3160	Gar1/Naf1 RNA binding region, putative	ZUnknown	Tb927.02.3160	+	1734	809	-0.3988	8.21e-07	-0.4318	0.393574	-0.463	0.169	1.54	1.3372	0	0	0	0	-0.3587	-0.0408	0.778	0.1346	1.07	0.0976
Tb927.11.16190	hypothetical protein	ZUnknown	Tb927.11.16190	+	NA	181	0.0727	0.741	0.8846	0.546516	0.4393	0.362	1.67	1.3372	0	0	0	0	#N/A	-0.6583	-0.341	-0.171	0.99	-0.0145
Tb927.4.2290	glucose transporter, putative	Glucose.glycerol	Tb927.04.2290	+	2317	1965	0.3327	1.66e-08	0.1357	1	0.1345	0.999	1.35	1.3353	0	0	0	0	0.4926	0.2777	0.07	-0.087	1.2	0.263
Tb927.8.8020	monoglyceride lipase, putative	Lipids	Tb927.08.8020	+	2946	774	-0.9151	9.69e-22	0.6285	0.049624	0.5976	0.0195	1.5	1.3315	1	0	0	1	-0.2265	-0.2447	0.142	-0.4129	1.3	0.3785
Tb927.4.700	hypothetical protein, conserved	ZUnknown	Tb927.04.0700	-	1241	525	-0.6477	1.51e-11	-0.2684	0.807534	-0.2691	0.665	1.58	1.3315	1	0	0	0	-0.5734	-0.5442	0.044	0.3765	1.15	0.2016
Tb927.8.3260	YceI-like domain containing protein, putative	ZUnknown	Tb927.08.3260	+	1082	334	0.1547	0.255	0.1786	0.931956	0.1281	0.98	1.11	1.3296	0	0	0	0	-0.676	-0.3922	0.456	-0.223	1.06	0.0841
Tb927.10.5510	endonuclease/exonuclease/phosphatase, putative	DNA	Tb927.10.05510	+	2941	1673	0.0104	0.897	1.1196	0.00195656	1.0757	0.000171	1.45	1.3277	0	0	0	1	1.3727	0.1948	0.235	1.3919	1.26	0.3334
Tb927.11.820	hypothetical protein	ZUnknown	Tb927.11.00820	+	NA	410	-0.562	1.05e-06	0.5028	0.114866	0.9869	0.000764	1.09	1.3258	0	0	0	0	0.9732	0.07	0.335	0.2487	0.72	-0.4739
Tb927.5.3680	GPI-GlcNAc transferase complex, PIG-H component, putative	ZUnknown	Tb927.05.3680	+	1062	791	-0.0619	0.534	0.2934	0.949654	0.2542	0.959	0.82	1.3239	0	0	0	0	-0.785	-0.1979	-0.022	-0.2669	1.09	0.1243
Tb927.11.10810	PUF11	RNA.binding	Tb927.11.10810	+	NA	4210	0.017	0.795	1.2368	2.49602e-06	1.1457	4.19e-05	0.77	1.3219	0	0	0	1	#N/A	0.2377	-0.193	4.0618	1.46	0.546
Tb927.11.5940	GRESAG 4, putative receptor-type adenylate cyclase	GRESAG	Tb927.11.005940	-	NA	1549	-1.4039	5e-98	-2.1999	3.57299e-05	-2.1506	1.35e-09	1.11	1.3219	1	0	1	0	0.0229	0.8486	0.27	-1.6606	1.17	0.2265
Tb927.9.12200	60S ribosomal protein L31	Ribosome	Tb927.09.12200	+	NA	21363	-0.0735	0.0852	-0.2808	0.576317	-0.2622	0.958	1.35	1.3219	0	0	0	0	-1.7865	0.0446	0.75	-1.0183	1.01	0.0144
Tb927.5.3370	hypothetical protein	ZUnknown	Tb927.05.3370	-	2164	1476	0.2534	0.00018	-0.0252	1	-0.0365	0.999	1.65	1.3219	0	0	0	0	-0.1622	0.2072	0.848	0.3611	0.99	-0.0145
Tb927.10.5970	predicted zinc finger protein	ZUnknown	Tb927.10.05970	-	2668	1268	0.2096	0.00313	0.4716	0.91654	0.3567	0.162	2.41	1.32	0	0	0	0	0.568	0.0217	-0.296	0.2346	1.34	0.4222
Tb927.9.6090	PTP1-interacting protein, 39 kDa PIP39	Protein.phosphatase	Tb927.09.06090	+	NA	9761	0.0941	0.186	0.3767	0.840947	0.4299	0.746	1.55	1.3181	0	0	0	0	-0.3261	-0.0214	0.992	0.2989	1.04	0.0566
Tb927.10.620	hypothetical protein, conserved	ZUnknown	Tb927.10.00620	+	1605	3581	0.5934	1.36e-29	1.7825	0.000225263	1.6509	1.25e-05	1.28	1.3161	0	1	0	1	0.9946	0.0222	-0.512	0.106	1.43	0.516
Tb927.1.4010	TbPRI2, primase 2, kDNA replication	Mito.DNA	Tb927.01.4010	+	4233	4359	0.2473	5.06e-06	0.9147	0.00131536	0.8916	0.0584	0.89	1.3161	0	0	0	1	0.5937	0.8743	-0.558	0.2604	1.14	0.189
Tb927.5.1220	hypothetical protein, conserved	ZUnknown	Tb927.05.1220	+	891	465	0.1189	0.356	0.0192	1	-0.014	0.999	1.21	1.3161	0	0	0	0	0.1653	-0.5425	-0.05	-0.0402	1.09	0.1243
Tb927.3.5280	spliceosome-associated protein 49, SF3b(SAP)49 (DRBD1)	RNA.processing	Tb927.03.5280	+	1000	1057	0.0023	0.981	-0.0102	1	-0.0075	0.999	1.63	1.3161	0	0	0	0	-0.9365	-0.2295	-0.071	-0.1653	1.04	0.0566
Tb927.7.4280	hypothetical protein, conserved	ZUnknown	Tb927.07.4280	-	NA	845	0.4333	4.14e-08	0.6996	0.349422	0.7106	0.121	1.55	1.3123	0	0	0	0	#N/A	#N/A	0.056	0.7279	1.1	0.1375
Tb927.7.5070	hypothetical protein	ZUnknown	Tb927.07.5070	+	2200	2417	-0.1398	0.0312	-0.1162	1	-0.1024	0.999	1.04	1.3123	0	0	0	0	-1.1867	-0.6313	0.286	0.0662	0.92	-0.1203
Tb927.7.7500	thymine-7-hydroxylase TLP7	Nucleotides	Tb927.07.7500	+	NA	1135	0.2814	0.00121	0.914	0.487768	0.3356	0.999	1.72	1.3084	0	0	0	0	#N/A	#N/A	0.827	-0.9204	1.03	0.0426
Tb927.9.12000	LEM3 (ligand-effect modulator 3) family / CDC50 family, putative	ZUnknown	Tb927.09.12000	+	NA	2020	-0.1278	0.0681	0.4096	0.680515	0.24	0.625	2.05	1.3065	0	0	0	0	0.916	0.4949	-0.339	0.5595	1.23	0.2987
Tb927.7.1930	nucleoside diphosphatase, putative,ectonucleoside triphosphate diphosphohydrolase 5, putative	Enzyme	Tb927.07.1930	+	2014	483	0.2438	0.0253	0.7801	0.0242489	0.7877	0.00445	1.84	1.3065	0	0	0	1	0.6536	-0.8675	-0.193	0.5915	1.23	0.2987
Tb927.11.5860	protein kinase, putative	Protein.kinase	Tb927.11.05860	+	NA	432	0.1512	0.197	-0.4059	0.532803	-0.4751	0.0563	1.35	1.3065	0	0	0	0	1.3727	0.875	1.026	-0.0679	1.17	0.2265
Tb927.11.11240	hypothetical protein, conserved	ZUnknown	Tb927.11.11240	+	NA	686	-0.0174	0.887	0.0714	1	0.0671	0.999	1.88	1.3045	0	0	0	0	0.6419	-0.2372	0.404	0.4281	1.01	0.0144
Tb927.7.980	hypothetical protein, conserved	ZUnknown	Tb927.07.0980	+	2947	1838	0.0568	0.442	0.292	0.650187	0.2915	0.0374	1.12	1.3026	0	0	0	0	0.3238	0.4712	0.258	0.0588	1.32	0.4005
Tb927.7.4690	hypothetical protein	ZUnknown	Tb927.07.4690	-	3122	1027	0.2805	0.000929	0.7474	0.0301821	-0.2531	0.959	1.44	1.3006	0	0	0	1	1.7927	0.3523	0.178	1.7841	1.05	0.0704
Tb927.11.1780	protein phosphatase 2C, putative	Protein.phosphatase	Tb927.11.01780	-	NA	1081	0.2912	0.000217	0.1635	1	0.1198	0.97	1.83	1.2967	0	0	0	0	-0.1458	-0.0353	0.381	0.0646	1.05	0.0704
Tb927.5.1550	mitochondrial carrier protein, MCP23	Mito.transport	Tb927.05.1550	-	1824	1428	-0.2507	0.000179	0.1612	1	0.1743	0.999	2.05	1.2947	0	0	0	0	0.9183	-0.516	-1.236	-1.2072	1.01	0.0144
Tb927.2.5080	hypothetical protein, conserved	ZUnknown	Tb927.02.5080	-	1506	729	0.3587	3.84e-05	0.0187	1	0.0334	0.999	2.07	1.2928	0	0	0	0	-0.5797	-0.2003	0.203	0.074	2.15	1.1043
Tb927.10.8900	choline/ethanolamine phosphotransferase (CEPT)	Lipids	Tb927.10.08900	+	4961	4745	-0.2723	3.4e-07	1.8174	4.97353e-14	1.7114	3.07e-10	1.26	1.2928	0	0	0	1	1.4586	0.2761	-0.465	0.036	1.24	0.3103
Tb927.7.2690	hypothetical protein, conserved	Mito.pathway	Tb927.07.2690	-	430	420	0.0849	0.522	-0.1218	1	-0.11	0.999	1.32	1.2928	0	0	0	0	-0.0324	-0.252	0.002	-0.0679	1.04	0.0566
Tb927.5.2000	hypothetical protein copurifies with MKT1 & XAC1, one Q8, salivaria & stercoraria only, well translated only in bloodstream forms	ZUnknown	Tb927.05.2000	+	6262	3556	-1.1208	5.87e-82	1.8686	8.92047e-07	1.8085	4.11e-05	1.27	1.2908	1	0	0	1	2.0422	0.2036	-0.185	2.453	1.13	0.1763
Tb927.4.2250	hypothetical protein, conserved, no known domains	ZUnknown	Tb927.04.2250	+	1792	937	0.0199	0.859	-0.001	1	-0.0146	0.999	1.38	1.2889	0	0	0	0	-0.42	0.3616	0.005	0.0536	1.08	0.111
Tb927.3.5200	hypothetical protein, conserved	ZUnknown	Tb927.03.5200	+	942	1048	0.2274	0.00227	0.0814	1	0.0806	0.999	1.57	1.2869	0	0	0	0	-0.4867	-0.1777	-0.337	0.167	1.02	0.0286
Tb927.11.10940	hypothetical protein, conserved, no domains	ZUnknown	Tb927.11.10940	+	NA	1874	-0.0683	0.348	1.1747	0.029414	1.027	0.0383	1.81	1.2869	0	0	0	1	1.8595	0.1346	-0.566	0.7469	1	0
Tb927.2.2910	hypothetical protein, conserved	ZUnknown	Tb927.02.2910	+	1698	997	-0.1052	0.208	-0.1983	0.883631	-0.2398	0.658	1.45	1.2849	0	0	0	0	-0.0455	-0.0989	0.217	-0.1686	1.24	0.3103
Tb927.11.14220	REG9.1 required for regulaltion of ESAG9	RNA.binding	Tb927.11.14220	+	NA	4742	-0.2204	1.36e-05	1.1916	0.00091915	1.054	0.0572	1.26	1.2849	0	0	0	1	0.8894	0.2787	-0.492	0.8447	1.06	0.0841
Tb927.5.1260	Sulfate transporter N-terminal domain with GLY motif/Sulfate transporter family, putative	ZUnknown	Tb927.05.1260	+	1830	2927	-0.0989	0.105	0.9196	0.00285463	0.897	0.0989	1.06	1.2829	0	0	0	1	1.6106	0.084	-0.182	0.7064	0.97	-0.0439
Tb927.11.16540	Roadblock/LC7 domain containing protein, putative	ZUnknown	Tb927.11.16540	-	NA	514	0.0876	0.477	0.0727	1	0.1098	0.999	1.2	1.279	0	0	0	0	0.5786	-0.904	-0.598	0.7504	1.07	0.0976
Tb927.10.1540	ZC3H30	RNA.binding	Tb927.10.01540	-	5394	1987	-0.3999	3.58e-09	0.8501	0.441245	0.7631	0.108	1.2	1.279	0	0	0	0	1.0096	0.5975	0.425	0.2111	1.02	0.0286
Tb927.4.4780	hypothetical protein	ZUnknown	Tb927.04.4780	-	666	358	-0.6094	3.24e-06	0.5454	0.346699	0.647	0.242	1.13	1.279	1	0	0	0	1.9836	0.0526	0.14	1.531	1.02	0.0286
Tb927.2.3720	ubiquitin-conjugating enzyme, putative	Ubiquitin.proteasome	Tb927.02.3720	-	756	1062	0.7244	9.49e-18	2.2865	1.30133e-07	1.8453	0.000787	1.71	1.275	0	1	0	1	0.0968	0.652	-0.056	0.5301	1.68	0.7485
Tb927.11.2910	phosphoglycerate mutase, putative (iPGAM)	Glucose.glycerol	Tb927.11.02910	-	NA	1214	0.1089	0.177	0.1729	1	0.1319	0.965	1.79	1.275	0	0	0	0	0.065	0.2902	0.462	0.2692	1.03	0.0426
Tb927.4.2500	eIF2K2 eukaryotic translation initiation factor 2-alpha kinase	Protein.kinase	Tb927.04.2500	+	6090	5106	0.591	2.77e-41	1.8526	3.50251e-06	1.6762	1.04e-12	1.11	1.273	0	1	0	1	1.1809	0.8254	-0.156	0.637	2.18	1.1243
Tb927.9.14190	hypothetical protein, conserved	ZUnknown	Tb927.09.14190	-	NA	1765	0.3289	9.21e-07	0.4012	0.73533	0.3944	0.256	0.81	1.273	0	0	0	0	1.0633	0.5806	0.683	-0.0074	1.07	0.0976
Tb927.11.12340	predicted Zinc finger, C3HC4 type (RING finger) protein	Ubiquitin.proteasome	Tb927.11.12340	+	NA	700	0.0844	0.398	0.0124	1	0.0542	0.999	2.15	1.269	0	0	0	0	1.0043	-0.0426	0.297	1.1493	1.07	0.0976
Tb927.8.8140	small GTP-binding rab protein, putative	Vesicular.transport	Tb927.08.8140	+	2318	1846	-0.7889	1.96e-26	0.8547	0.0806601	0.6236	0.056	1.85	1.269	1	0	0	0	2.0044	0.8515	0.441	2.3356	1.02	0.0286
Tb927.11.15510	hypothetical protein, conserved	ZUnknown	Tb927.11.15510	-	NA	484	-0.021	0.878	-0.0859	1	-0.0552	0.999	1.21	1.267	0	0	0	0	-0.7154	0.1563	0.016	-0.2859	1	0
Tb927.11.8430	hypothetical protein, conserved	ZUnknown	Tb927.11.08430	+	NA	1494	0.9142	4.6e-46	1.9161	7.51696e-15	1.4584	2.84e-26	1.56	1.265	0	1	0	1	0.0751	-0.1578	-0.924	1.0004	1.42	0.5059
Tb927.8.1030	chaperone DNAj, putative, J48	Chaperone	Tb927.08.1030	-	1512	718	0.1963	0.0371	-0.1058	1	-0.123	0.988	1.87	1.265	0	0	0	0	-1.4714	0.0985	0.153	-0.1592	1.06	0.0841
Tb927.4.4080	C-5 sterol desaturase, putative	Sterols	Tb927.04.4080	-	1144	331	0.2408	0.0845	-0.1705	1	-0.2034	0.809	1.52	1.265	0	0	0	0	-0.6734	-0.1528	0.3	-0.4883	0.98	-0.0291
Tb927.7.6850	trans-sialidase (TbTS)	Membrane.protein	Tb927.07.6850	-	3161	2437	0.8236	9.82e-47	-1.0369	0.000578501	-1.0748	0.000295	1.26	1.263	0	1	1	0	-1.3312	0.2316	1.354	-2.6419	1.14	0.189
Tb927.6.4020	hypothetical protein, conserved	ZUnknown	Tb927.06.4020	-	469	942	-0.2314	0.00819	0.1131	1	0.1269	0.999	0.74	1.263	0	0	0	0	-0.8206	-0.5073	-0.389	-0.0411	1	0
Tb927.10.3280	60S ribosomal protein L38	Ribosome	Tb927.10.03280	+	494	7158	-0.0817	0.11	-0.1685	1	-0.1921	0.999	0.5	1.261	0	0	0	0	-0.4814	-0.0367	0.599	-0.9513	1.04	0.0566
Tb927.10.14950	ZC3H40	RNA.binding	Tb927.10.14950	+	1613	2296	0.6594	3.52e-30	0.4678	0.26431	0.4759	0.311	1.18	1.261	0	1	0	0	-1.2854	0.9217	0.734	-0.1403	0.97	-0.0439
Tb927.1.2200	ZC3H4	RNA.binding	Tb927.01.2200	+	438	312	-2.3369	7.59e-63	-0.3371	0.92479	-0.4118	0.832	1.07	1.261	1	0	0	0	0.588	-0.0837	0.06	1.0177	0.53	-0.9159
Tb927.7.1630	hypothetical protein, conserved	ZUnknown	Tb927.07.1630	+	854	848	0.2091	0.0153	0.099	1	0.1154	0.999	1.19	1.259	0	0	0	0	#N/A	-0.0227	0.461	-0.5026	1.03	0.0426
Tb927.7.6190	Ring finger domain containing protein, putative	ZUnknown	Tb927.07.6190	-	3507	1128	0.1727	0.0256	1.8444	0.000117968	1.7019	4.75e-05	1.38	1.257	0	0	0	1	1.0486	0.8225	0.233	0.9921	1.32	0.4005
Tb927.2.2360	Ankyrin repeats (3 copies)/Zinc finger, C3HC4 type (RING finger), putative	ZUnknown	Tb927.02.2360	-	4027	1477	-0.0028	0.974	1.0354	2.59303e-05	1.0127	8.38e-08	1.33	1.257	0	0	0	1	0.1772	0.6777	0.743	0.7065	1.24	0.3103
Tb927.6.4350	ribosomal RNA assembly protein, putative	rRNA.tRNA.process	Tb927.06.4350	-	978	817	-0.4623	5.78e-07	-0.3845	0.295973	-0.3944	0.0778	1.22	1.257	0	0	0	0	-0.5838	-0.0154	0.585	-0.3204	1.03	0.0426
Tb927.9.15080	hypothetical protein, conserved	ZUnknown	Tb927.09.15080	+	NA	276	0.48	0.000267	0	1	-0.0105	0.999	1.69	1.255	0	0	0	0	-1.3027	0.1199	0.623	-0.5229	0.92	-0.1203
Tb927.9.15510	BARP protein	Membrane.protein	Tb927.09.15510	+	NA	1485	0.2023	0.0289	0.9629	0.174582	0.9179	0.289	0.82	1.253	0	0	0	0	#N/A	0.2764	0.783	1.1697	1.45	0.5361
Tb927.7.3970	hypothetical protein, conserved	ZUnknown	Tb927.07.3970	+	5589	2247	-0.1292	0.108	1.0201	0.215896	0.9282	0.101	1.8	1.253	0	0	0	0	0.4279	0.9718	-0.009	-0.2146	1.12	0.1635
Tb927.8.3600	hypothetical protein, conserved	ZUnknown	Tb927.08.3600	-	778	256	-0.0205	0.914	0.0646	1	0.0723	0.999	1.71	1.253	0	0	0	0	0.0618	-0.0871	0.027	-0.382	1.09	0.1243
Tb927.11.6190	hypothetical protein, conserved	ZUnknown	Tb927.11.06190	-	NA	208	-0.7362	5.44e-07	-0.2019	0.954904	-0.1354	0.999	0.78	1.253	1	0	0	0	-0.6407	-0.2834	0.787	0.3716	1.04	0.0566
Tb927.7.3690	hypothetical protein, probably a 3'-UTR	ZUnknown	Tb927.07.3690	-	1475	744	-0.0483	0.742	0.7446	0.656722	1.0687	0.0154	1.17	1.251	0	0	0	0	1.2134	-0.4209	0.295	0.5315	0.85	-0.2345
Tb927.8.5480	hypothetical protein, conserved	ZUnknown	Tb927.08.5480	+	3145	1161	-0.0109	0.905	0.0746	1	0.0877	0.999	2.08	1.2489	0	0	0	0	0.9589	0.3744	0.041	0.6491	1.05	0.0704
Tb927.7.4810	HD domain containing protein, putative	ZUnknown	Tb927.07.4810	-	1600	1223	0.1214	0.16	0.0456	1	0.0877	0.999	1.84	1.2489	0	0	0	0	0.6592	0.1825	0.726	0.952	0.99	-0.0145
Tb927.6.2450	PKB protein kinase, putative	Protein.kinase	Tb927.06.2450	+	3291	1382	0.2204	0.00184	-0.0308	1	-0.1016	0.999	1.61	1.2469	0	0	0	0	-1.2654	0.3286	0.198	0.6041	1	0
Tb927.2.4470	hypothetical protein, conserved	ZUnknown	Tb927.02.4470	-	2917	1698	0.1047	0.144	0.1241	1	0.1009	0.999	1.15	1.2469	0	0	0	0	0.4613	0.0642	0.393	1.0278	0.97	-0.0439
Tb927.4.840	Histidine kinase-, DNA gyrase B-, and HSP90-like ATPase, putative	ZUnknown	Tb927.04.0840	-	1770	1058	-0.3498	1.33e-06	-0.582	0.162404	-0.5589	0.00584	1.51	1.2449	0	0	0	0	-1.2683	0.1991	0.303	0.0757	0.99	-0.0145
Tb927.10.13840	Domain of unknown function (DUF4475), putative	ZUnknown	Tb927.10.13840	-	2102	1294	0.8694	2.6e-40	0.7453	0.0104399	0.6999	2.71e-08	1.43	1.2429	0	1	0	1	-0.5385	1.0033	1.353	0.974	1.13	0.1763
Tb927.10.3400	hypothetical protein, conserved	ZUnknown	Tb927.10.03400	+	1362	2621	-0.4576	4.95e-17	2.0992	9.95118e-12	1.9436	6.17e-08	1.36	1.2408	0	0	0	1	0.0617	-0.3535	-1.166	-0.6552	1.22	0.2869
Tb927.2.5480	hypothetical protein, conserved	ZUnknown	Tb927.02.5480	-	6233	1925	-0.0094	0.904	0.2392	1	2.9382	0.999	1.01	1.2408	0	0	0	0	0.5114	0.5873	0.357	0.3594	1.08	0.111
Tb927.1.1390	hypothetical protein, conserved	ZUnknown	Tb927.01.1390	+	1153	592	-0.0138	0.913	-0.1205	1	-0.0491	0.999	1.59	1.2388	0	0	0	0	-0.8213	-0.089	0.482	-0.6319	1.02	0.0286
Tb927.7.4730	PUF5	RNA.binding	Tb927.07.4730	-	3756	1879	1.0483	1.49e-43	1.4127	0.00587855	1.3781	0.00439	1.69	1.2367	0	1	0	1	0.0585	0.9156	-0.025	0.7838	1.03	0.0426
Tb927.11.3460	hypothetical protein, conserved	ZUnknown	Tb927.11.03460	+	NA	943	0.0268	0.785	0.013	1	0.0102	0.999	1.39	1.2367	0	0	0	0	-0.291	-0.0619	0.45	1.3913	1.02	0.0286
Tb927.4.4940	hypothetical protein, conserved, poly(Q), no clear yeast or human matches	ZUnknown	Tb927.04.4940	-	4961	1198	1.6612	1.37e-88	1.511	1.00024e-08	1.2003	0.000232	1.14	1.2347	0	1	0	1	-2.0312	0.6425	1.291	-1.4821	1.6	0.6781
Tb927.10.11510	hypothetical protein, conserved	ZUnknown	Tb927.10.11510	+	2847	1511	0.0036	0.969	0.0501	1	0.0393	0.999	1.82	1.2347	0	0	0	0	-0.4617	0.2657	-0.139	0.1264	1.01	0.0144
Tb927.8.4410	ARP2/3 complex subunit, putative	Cytoskeleton	Tb927.08.4410	-	1672	623	0.4515	1.1e-06	0.1072	1	0.1181	0.982	2.26	1.2327	0	0	0	0	0.5612	-0.0577	0.229	0.409	1.23	0.2987
Tb927.8.1580	hypothetical protein, conserved	ZUnknown	Tb927.08.1580	+	2757	1189	1.1329	3.03e-42	1.7467	4.30395e-17	1.3263	3.34e-26	2	1.2306	0	1	0	1	-0.6301	0.3045	-0.057	-0.7626	2.26	1.1763
Tb927.10.15620	hypothetical protein	ZUnknown	#N/A	#N/A	NA	395	0.7625	3.12e-08	3.1176	2.43533e-18	1.739	1.3e-05	0.49	1.2306	0	1	0	1	#N/A	#N/A	0.542	1.4094	1.58	0.6599
Tb927.10.12280	hypothetical protein	ZUnknown	Tb927.10.12280	+	608	156	-0.061	0.77	1.3897	0.0312301	1.2051	0.0474	1.1	1.2306	0	0	0	1	-0.2329	-0.0201	-0.127	-2.2792	1.16	0.2141
Tb927.5.1490	eIF4G1	Translation	Tb927.05.1490	-	3681	5157	-0.0497	0.467	2.3345	1.38585e-14	2.3298	1.21e-10	0.81	1.2286	0	0	0	1	1.1204	1.227	0.416	-0.5192	1.23	0.2987
Tb927.10.2610	Domain of unknown function (DUF1935), putative	ZUnknown	Tb927.10.02610	+	2795	2574	0.4794	2.1e-18	0.3095	0.800545	0.1596	0.919	1.49	1.2286	0	0	0	0	1.518	-0.2738	-0.517	0.5321	1.22	0.2869
Tb927.8.1240	electron transfer flavoprotein-ubiquinone oxidoreductase, putative	Mito.e.transport	Tb927.08.1240	-	2081	1320	0.3902	1.32e-08	0.2101	1	0.2041	0.742	1.44	1.2286	0	0	0	0	-0.2209	0.6566	0.155	-0.1367	1.17	0.2265
Tb927.8.7370	hypothetical protein	ZUnknown	Tb927.08.7370	+	1767	1429	0.0816	0.262	0.1516	1	0.1422	0.974	1.71	1.2286	0	0	0	0	-0.4145	0.6336	0.306	0.3342	1.07	0.0976
Tb927.1.4650	cyclin-like F-box protein (CFB2)	Ubiquitin.proteasome	Tb927.01.4650	+	1563	9718	-0.8153	1.36e-70	1.5509	0.000113242	1.6373	0.00193	0.88	1.2286	1	0	0	1	#N/A	0.7994	-0.267	3.4455	0.86	-0.2176
Tb927.8.1720	phosphatidylglycerolphosphate synthase, mitochondrial	Lipids	Tb927.08.1720	-	2862	1751	0.1998	0.00223	-0.0538	1	-0.0623	0.999	1.4	1.2245	0	0	0	0	-0.638	0.7186	0.476	-1.0147	1.32	0.4005
Tb927.8.550	peptide methionine sulfoxide reductase, putative	Protease	Tb927.08.0550	-	969	619	-0.232	0.0171	-0.4074	0.674515	-0.4212	0.371	1.49	1.2245	0	0	0	0	-0.8066	-0.2124	1.646	-0.8755	1.02	0.0286
Tb927.8.5160	hypothetical protein, conserved	ZUnknown	Tb927.08.5160	+	5604	2279	0.5533	1.53e-20	0.2279	1	0.1857	0.928	0.79	1.2203	0	0	0	0	0.5284	0.777	0.477	-0.4726	1.08	0.111
Tb927.8.4340	hypothetical protein, conserved, signal peptide, 4TM domains, no functional domains or BLASTp hits	ZUnknown	Tb927.08.4340	-	2579	822	-0.7835	4.49e-18	1.2787	0.0821111	1.0847	0.000551	1.65	1.2183	1	0	0	0	1.6021	0.0282	-0.528	4.146	1	0
Tb927.8.4600	Zinc finger, C3HC4 type (RING finger), putative	Zinc.finger	Tb927.08.4600	-	1803	890	0.4633	1.15e-09	0.353	0.198616	0.3164	0.0522	1.62	1.2162	0	0	0	0	0.3246	0.2674	0.431	0.7217	1.42	0.5059
Tb927.3.1560	TIF2 ttaggg binding factor interacting	DNA	Tb927.03.1560	-	2277	1156	0.0754	0.405	0.2174	0.993384	0.2152	0.852	0.98	1.2162	0	0	0	0	-0.0279	-0.3805	0.07	-0.5237	1.01	0.0144
Tb927.11.870	mitochondrial ribosomal protein l23	Mito.translation	Tb927.11.00870	+	NA	715	0.1604	0.105	0.0873	1	0.2743	0.647	1.69	1.2162	0	0	0	0	0.01	0.0252	0.126	-0.1591	0.99	-0.0145
Tb927.10.14480	hypothetical protein, conserved	ZUnknown	Tb927.10.14480	-	4934	3281	0.2837	7.65e-07	1.4028	0.000226419	1.2689	1.28e-07	1.36	1.2141	0	0	0	1	0.0218	0.7631	0.493	0.944	1.02	0.0286
Tb927.6.3860	leucyl/phenylalanyl-tRNA protein transferase, putative	ZUnknown	Tb927.06.3860	-	1780	714	-0.356	2.9e-05	-0.4109	0.875348	-0.4469	0.523	1.96	1.2141	0	0	0	0	0.0063	0.047	0.097	0.353	0.98	-0.0291
Tb927.4.2100	hypothetical protein	ZUnknown	Tb927.04.2100	+	1203	270	0.1352	0.375	0.0753	1	0.049	0.999	1.18	1.2121	0	0	0	0	0.9655	-0.037	0.284	0.1067	1.08	0.111
Tb927.11.9160	ATPase-like protein, putative	Enzyme	Tb927.11.09160	+	NA	527	-0.1013	0.385	-0.0004	1	-0.0165	0.999	1	1.2079	0	0	0	0	0.8095	-0.0796	0.382	0.5061	0.95	-0.074
Tb927.6.2640	importin alpha subunit, putative (TbKap60)	Nuclear.transport	Tb927.06.2640	+	1602	3819	-0.1805	0.000437	0.6227	0.760154	0.5993	0.663	1.55	1.2058	0	0	0	0	-0.7373	0.461	0.21	-0.3429	1.1	0.1375
Tb927.1.2600	PUF9	RNA.binding	Tb927.01.2600	+	3046	3199	-1.4265	3.5e-163	0.894	0.0339165	0.621	0.461	1.41	1.2037	1	0	0	1	1.5817	-0.0409	-0.505	-1.0929	1.24	0.3103
Tb927.5.1570	ZC3H12	RNA.binding	Tb927.05.1570	-	3325	668	-0.1078	0.292	0.5477	0.48338	0.1922	0.999	1.43	1.2037	0	0	0	0	1.9208	0.596	0.208	0.7044	1.23	0.2987
Tb927.10.8370	hypothetical protein, conserved	ZUnknown	Tb927.10.08370	+	1304	432	-0.2985	0.0106	-0.0896	1	-0.0603	0.999	1.49	1.2037	0	0	0	0	-0.3501	0.1398	0.807	-0.2083	1.22	0.2869
Tb927.11.10610	hypothetical protein, conserved	ZUnknown	Tb927.11.10610	+	NA	2661	-0.0926	0.147	0.4539	0.668893	0.4294	0.762	1.41	1.2037	0	0	0	0	0.5973	0.4614	0.004	0.4195	1.14	0.189
Tb927.3.2970	hypothetical protein, conserved	ZUnknown	Tb927.03.2970	-	832	399	0.3277	0.00549	-0.0849	1	-0.1095	0.999	2.04	1.2037	0	0	0	0	-0.6408	-0.1755	0.232	0.3173	1.12	0.1635
Tb927.10.1300	hypothetical protein, conserved, no homologues	ZUnknown	Tb927.10.01300	-	1290	656	0.0057	0.965	0.0239	1	0.0493	0.999	0.87	1.2037	0	0	0	0	-0.1021	0.011	0.03	0.2644	0.94	-0.0893
Tb927.8.670	hypothetical protein, conserved	ZUnknown	Tb927.08.0670	-	2705	762	-0.6703	2.37e-15	1.2025	2.10895e-06	0.9936	4.3e-07	0.94	1.2016	1	0	0	1	0.2137	0.2418	0.246	1.3156	1.17	0.2265
Tb927.11.12270	hypothetical protein, conserved,drug resistence protein, putative	Membrane.protein	Tb927.11.12270	+	NA	992	-0.0183	0.856	-0.1707	1	-0.1448	0.993	1.36	1.2016	0	0	0	0	0.1072	0.3644	0.529	-0.2733	0.85	-0.2345
Tb927.3.2980	mitochondrial carrier protein, MCP17	Mito.transport	Tb927.03.2980	-	1299	682	-0.1192	0.226	-0.1303	1	-0.1032	0.999	1.88	1.1995	0	0	0	0	-0.3583	-0.2254	0.489	-0.5994	1.09	0.1243
Tb927.11.14270	protein kinase, putative	Protein.kinase	Tb927.11.14270	+	NA	1846	0.1345	0.0524	0.1991	1	0.19	0.659	1.43	1.1995	0	0	0	0	0.65	0.2393	0.466	-0.2053	1	0
Tb927.11.16790	DYRK2 mitogen-activated protein kinase	Protein.kinase	Tb927.11.16790	-	NA	3846	0.4016	4.98e-17	1.6969	1.98701e-07	1.622	1.07e-06	1.04	1.1974	0	0	0	1	0.617	0.0369	-0.825	1.1449	1.08	0.111
Tb927.8.2420	hypothetical protein, conserved	ZUnknown	Tb927.08.2420	+	1472	651	0.2175	0.0192	-0.0565	1	-0.0567	0.999	2.06	1.1953	0	0	0	0	0.1414	0.0796	1.028	0.114	1.04	0.0566
Tb927.11.3660	dynein light chain, putative,dynein Tctex1 family, putative	Cytoskeleton	Tb927.11.03660	+	NA	1058	-0.2164	0.00925	-0.0895	1	-0.1346	0.956	1.74	1.1953	0	0	0	0	0.8727	-0.6503	-0.798	-0.0739	0.95	-0.074
Tb927.1.3450	hypothetical protein, conserved	ZUnknown	Tb927.01.3450	-	2419	3132	-0.7072	4.26e-39	-0.6661	0.435459	-0.6933	0.0464	1.87	1.1932	1	0	0	0	0.0784	0.5165	0.093	0.0226	2.48	1.3103
Tb927.11.3720	Ring finger domain containing protein, putative	ZUnknown	Tb927.11.03720	+	NA	4048	-0.1314	0.00859	1.9474	1.67156e-10	1.8908	5.27e-08	1.12	1.1932	0	0	0	1	1.5343	0.8883	-0.778	1.9373	1.17	0.2265
Tb927.3.3730	ABC transporter, putative	Transporter	Tb927.03.3730	+	6953	4223	0.3734	5.99e-13	0.32	0.972215	0.3169	0.774	0.79	1.1932	0	0	0	0	0.6949	1.0133	1.12	0.6216	0.98	-0.0291
Tb927.11.2150	hypothetical protein, conserved	ZUnknown	Tb927.11.02150	+	NA	1230	0.1326	0.088	0.4116	0.052238	0.3411	0.00301	1.98	1.189	0	0	0	0	0.2161	0.2971	0.17	0.5194	1.14	0.189
Tb927.6.1450	hypothetical protein, conserved	ZUnknown	Tb927.06.1450	-	1235	711	0.0901	0.373	-0.0803	1	-0.106	0.947	1.71	1.189	0	0	0	0	-1.3799	0.1343	0.694	-0.5201	1.11	0.1506
Tb927.6.600	CAF1	RNA.degradation	Tb927.06.0600	-	3643	2367	0.3379	7.41e-08	2.0014	2.2874e-08	1.7558	2.71e-08	0.84	1.1869	0	0	0	1	-0.6904	0.5968	0.056	0.156	1.14	0.189
Tb927.11.16310	myosin heavy chain, putative, in MCM-BP-TAP	Cytoskeleton	Tb927.11.16310	-	NA	2308	0.307	4.12e-07	0.3506	0.999072	0.349	0.545	0.71	1.1848	0	0	0	0	0.5546	0.7371	0.622	0.9147	1.13	0.1763
Tb927.9.9580	tubulin tyrosine ligase protein, putative	Cytoskeleton	Tb927.09.09580	-	NA	2404	0.0176	0.811	-0.0967	1	-0.1246	0.956	1.37	1.1848	0	0	0	0	1.4455	0.2209	0.033	-0.1965	1.02	0.0286
Tb927.3.3970	RNA binding protein, putative, LYAR-type C2HC zinc finger domain	RNA.binding	Tb927.03.3970	+	1292	1599	-0.3344	1.53e-06	0.0273	1	0.0269	0.999	0.88	1.1848	0	0	0	0	0.0323	-0.5222	0.45	-0.0604	0.98	-0.0291
Tb927.5.1130	hypothetical protein, conserved	Mito.pathway	Tb927.05.1130	+	3773	1484	0.4686	4.16e-10	1.3373	1.36243e-06	0.5657	0.545	1.23	1.1827	0	0	0	1	0.1736	0.6904	-0.082	-0.8251	2.16	1.111
Tb927.7.6780	hypothetical protein	ZUnknown	Tb927.07.6780	-	2709	850	0.3154	0.138	0.0866	1	0.0544	0.999	1.89	1.1827	0	0	0	0	0.6832	0.3877	0.242	-0.1801	1.21	0.275
Tb927.2.1890	E2-like ubiquitin-conjugation enzyme (ATG3)	Ubiquitin.proteasome	Tb927.02.1890	+	2241	823	0.0606	0.557	0.3063	1	0.2146	0.999	1.42	1.1827	0	0	0	0	0.4818	0.0843	0.051	0.5998	1.21	0.275
Tb927.10.11970	glutamine aminotransferase (GlnAT)	Amino.acids	Tb927.10.11970	+	1415	1502	0.6313	8.03e-17	-0.3553	0.76468	-0.3843	0.399	1.6	1.1827	0	1	0	0	-0.6979	0.2793	0.979	-2.0173	1.1	0.1375
Tb927.10.15310	hypothetical protein, conserved, linked to melarsoprol resistance, no yeast/human by NCBI	ZUnknown	Tb927.10.15310	+	5621	2397	-0.2359	3.77e-05	3.0048	1.33473e-21	2.5757	1.16e-16	0.86	1.1806	0	0	0	1	0.1091	0.4129	-0.209	0.3112	1.19	0.251
Tb927.8.5120	cytochrome c	Mito.e.transport	Tb927.08.5120	+	1734	1993	-0.482	6.95e-10	-0.6458	0.753702	-0.6689	0.564	0.61	1.1806	0	0	0	0	-1.0776	-0.7861	-0.454	-3.347	1.09	0.1243
Tb927.10.4020	hypothetical protein, conserved	ZUnknown	Tb927.10.04020	-	753	490	0.2173	0.0504	-0.0754	1	-0.0277	0.999	1.66	1.1784	0	0	0	0	-0.0902	-0.0278	0.186	-0.1764	1.31	0.3896
Tb927.10.670	hypothetical protein, conserved	ZUnknown	Tb927.10.00670	+	855	523	0.0043	0.977	-0.0804	1	-0.039	0.999	1.23	1.1784	0	0	0	0	-0.2945	-0.4015	0.173	-0.474	1.14	0.189
Tb927.7.2580	ZC3H19	RNA.binding	Tb927.07.2580	-	4805	1369	0.1162	0.148	0.0341	1	0.0229	0.999	1.46	1.1784	0	0	0	0	-0.0744	0.5956	0.539	0.146	1.04	0.0566
Tb927.9.2350	serine/threonine protein kinase, putative	Protein.kinase	Tb927.09.02350	-	NA	4334	0.2962	8.13e-09	0.1188	1	0.1194	0.999	1.23	1.1784	0	0	0	0	0.8645	0.1732	0.247	0.2264	1.03	0.0426
Tb927.10.14420	NEK16 protein kinase	Protein.kinase	Tb927.10.14420	-	7494	5846	0.146	0.00282	0.7814	0.299915	0.8063	0.0148	1.04	1.1742	0	0	0	0	1.6519	0.9719	0.308	0.3632	1.23	0.2987
Tb927.4.4220	small GTP-binding rab protein, putative (TbRX2)	Vesicular.transport	Tb927.04.4220	-	3411	1590	0.5832	1.24e-20	1.66	4.72452e-06	1.6676	8.69e-08	1.2	1.1742	0	0	0	1	0.8982	0.9083	0.03	-0.0286	0.87	-0.2009
Tb927.3.2360	hypothetical protein, conserved	ZUnknown	Tb927.03.2360	+	1658	668	0.3584	0.000606	0.3083	0.461672	0.3357	0.179	1.03	1.1742	0	0	0	0	0.5615	0.8089	0.71	0.4821	0.76	-0.3959
Tb927.10.15440	hypothetical protein, conserved	ZUnknown	Tb927.10.15440	+	1838	1081	-0.2117	0.00615	-0.0367	1	-0.0253	0.999	1.54	1.1721	0	0	0	0	0.9138	-0.0109	-0.008	1.5757	1.11	0.1506
Tb927.10.12030	hypothetical protein, conserved	ZUnknown	Tb927.10.12030	+	4506	1836	-0.2553	0.000555	0.7816	0.523094	0.3287	0.984	1.42	1.1699	0	0	0	0	0.3788	0.8113	-0.311	0.6839	1.36	0.4436
Tb927.11.3750	NADH-cytochrome b5 reductase, putative (B5R)	Mito.e.transport	Tb927.11.03750	+	NA	711	0.2913	0.000813	-0.3094	0.328184	-0.3227	0.517	1.67	1.1699	0	0	0	0	-1.2297	0.5924	0.274	-1.1554	1.2	0.263
Tb927.11.6220	palmitoyl acyltransferase 7, putative	Lipids	Tb927.11.06220	-	NA	1356	-0.3326	1.57e-06	0.2276	1	0.1567	0.994	1.45	1.1699	0	0	0	0	0.2913	0.534	0.338	0.5292	1.06	0.0841
Tb927.9.14170	hypothetical protein, conserved	ZUnknown	Tb927.09.14170	-	NA	935	0.0907	0.358	0.0272	1	0.0235	0.999	1.03	1.1678	0	0	0	0	0.4254	0.1102	0.234	1.1312	1.03	0.0426
Tb927.2.5800	sedoheptulose-1,7-bisphosphatase (SBPase)	Glucose.glycerol	Tb927.02.5800	+	1599	1690	-0.2167	0.000833	0.3722	0.144872	0.2837	0.437	1.34	1.1656	0	0	0	0	-0.0693	-0.0853	-0.685	-0.638	1.82	0.8639
Tb927.1.4300	chaperone DNAj, putative, J17	Chaperone	Tb927.01.4300	+	4558	1713	0.4183	1.23e-12	0.9896	0.0876571	0.8679	0.0395	1.61	1.1656	0	0	0	0	0.67	0.783	0.262	0.2665	1.47	0.5558
Tb927.5.3930	major facilitator superfamily, putative	ZUnknown	Tb927.05.3930	+	2077	1222	0.0006	0.995	-0.0605	1	-0.0949	0.999	1.2	1.1656	0	0	0	0	0.499	-0.3365	-0.088	0.3027	1.06	0.0841
Tb927.9.11640	hypothetical protein, conserved, predicted GPI anchor	Membrane.protein	Tb927.09.11640	+	NA	1301	0.0616	0.506	0.5956	0.0728101	0.2987	0.437	1.26	1.1614	0	0	0	0	1.1951	-0.4164	-0.291	0.2718	1.33	0.4114
Tb927.1.4230	hypothetical protein, conserved	Mito.pathway	Tb927.01.4230	+	1291	1527	0.3438	5.46e-06	0.3049	0.994489	0.3762	0.0678	1.34	1.1614	0	0	0	0	-0.0113	0.3669	0.33	-0.0547	0.81	-0.304
Tb927.5.1380	hypothetical protein	ZUnknown	Tb927.05.1380	+	1506	632	-0.0815	0.426	0.0978	1	0.065	0.999	1.54	1.1592	0	0	0	0	2.0295	-0.1454	0.043	1.8159	1.1	0.1375
Tb927.6.2830	TBC-D3 likely GAP	Signalling	Tb927.06.2830	+	2529	1473	-0.1753	0.0128	0.2822	1	0.6062	0.137	1.35	1.1592	0	0	0	0	-0.0622	0.3698	-0.182	1.4771	1.04	0.0566
Tb927.8.4610	Ras-related protein RabX1	Vesicular.transport	Tb927.08.4610	-	1332	962	0.0957	0.28	0.2694	0.590578	0.2394	0.663	1.34	1.1592	0	0	0	0	-0.3497	0.1189	-0.521	0.3858	1.03	0.0426
Tb927.11.14550	PPPDE putative peptidase domain containing protein, putative	ZUnknown	Tb927.11.14550	+	NA	1564	0.263	4.26e-05	0.0796	1	0.1015	0.996	1.41	1.1592	0	0	0	0	-0.4031	0.5531	-0.103	0.1143	0.99	-0.0145
Tb927.11.11120	hypothetical protein, conserved	ZUnknown	Tb927.11.11120	+	NA	429	-0.1334	0.276	-0.2384	0.749888	-0.2558	0.365	1.57	1.1592	0	0	0	0	-0.9007	-0.0747	0.115	-0.4267	0.98	-0.0291
Tb927.11.5670	MND1 homologue, putative involvement in meiosis	DNA	Tb927.11.05670	+	NA	725	1.6218	1.18e-66	-0.0999	1	-0.1027	0.999	1.86	1.157	0	1	0	0	-0.4408	0.2851	1.181	-0.0234	1.52	0.6041
Tb927.2.4870	kinetoplastid-specific dual specificity phosphatase, putative	Phosphatase	Tb927.02.4870	-	1002	974	0.0828	0.403	0.1671	0.984261	0.1874	0.832	1.38	1.157	0	0	0	0	0.1068	-0.1168	0.254	0.1927	1.05	0.0704
Tb927.11.14420	hypothetical protein, conserved	ZUnknown	Tb927.11.14420	+	NA	740	0.2806	0.00239	0.1131	1	0.1129	0.999	1.89	1.157	0	0	0	0	0.0421	0.1986	0.855	-0.1467	1.04	0.0566
Tb927.10.15350	histone H3 variant V (h3vaR)	Chromatin	Tb927.10.15350	+	5474	1582	-0.4935	0.00531	0.2709	1	0.1767	0.999	0.83	1.1549	0	0	0	0	-0.2647	-0.0752	-0.64	-0.3051	1.28	0.3561
Tb927.9.12400	protein kinase, putative	Protein.kinase	Tb927.09.12400	+	NA	2256	-0.2961	2.02e-07	-0.3102	1	-0.3164	0.94	1.37	1.1549	0	0	0	0	0.803	0.8537	-0.111	-0.1918	0.94	-0.0893
Tb927.2.4240	GTP binding protein, putative	Mito.pathway	Tb927.02.4240	-	2266	727	-0.0221	0.842	-0.1191	1	-0.1756	0.967	1.54	1.1527	0	0	0	0	-1.1511	0.0902	0.045	-1.3974	1.05	0.0704
Tb927.2.4440	hypothetical protein	ZUnknown	Tb927.02.4440	-	1152	889	-0.4901	1.78e-08	-0.0454	1	-0.0054	0.999	1.71	1.1527	0	0	0	0	0.1768	-0.3225	0.029	-0.656	0.92	-0.1203
Tb927.9.15380	NADH-ubiquinone oxidoreductase complex I subunit, putative,NDUFA9 subunit, putative	Mito.e.transport	Tb927.09.15380	+	NA	1507	0.4087	1.67e-09	0.058	1	0.0093	0.999	1.05	1.1506	0	0	0	0	-1.2251	0.3921	0.026	-0.4275	1.36	0.4436
Tb927.6.3070	hypothetical protein, conserved	ZUnknown	Tb927.06.3070	+	1077	1596	0.1121	0.112	0.5484	0.716947	0.4583	0.696	2	1.1506	0	0	0	0	-0.6853	0.2635	0.046	-0.0023	1.2	0.263
Tb927.3.1530	CorA-like Mg2+ transporter protein, putative	ZUnknown	Tb927.03.1530	-	NA	1166	0.3216	0.000239	-0.0978	1	-0.0894	0.999	1.12	1.1506	0	0	0	0	#N/A	#N/A	0.641	-0.0537	0.96	-0.0589
Tb927.2.4700	SDH8 succinate dehydrogenase (complex II) subunit	Mito.e.transport	Tb927.02.4700	-	2760	585	0.5048	5.25e-08	1.1775	0.0229593	0.7637	0.287	1.44	1.1484	0	0	0	1	-0.85	0.6634	0.376	-0.9656	1.73	0.7908
Tb927.11.7320	dual specificity phopshatase, putative	Phosphatase	Tb927.11.07320	+	NA	1049	0.5465	7.69e-13	0.1553	1	0.1211	0.999	1.08	1.1484	0	0	0	0	-0.4266	0.3076	0.776	-0.5305	1.12	0.1635
Tb927.11.11800	DNA repair and recombination helicase protein PIF3	Mito.DNA	Tb927.11.11800	+	NA	1810	0.4569	6.55e-15	0.4768	0.840947	0.4107	0.515	0.99	1.144	0	0	0	0	1.0821	0.8274	0.405	-0.0217	1.22	0.2869
Tb927.7.6270	peptidase t, putative	Protease	Tb927.07.6270	-	1826	1169	0.6862	1.65e-22	0.2055	0.958499	0.206	0.879	0.96	1.144	0	1	0	0	-0.4805	0.4996	0.482	-1.1446	1.22	0.2869
Tb927.11.14930	hypothetical protein, conserved	ZUnknown	Tb927.11.14930	-	NA	2343	-0.0251	0.737	0.1071	1	0.0642	0.999	1.8	1.144	0	0	0	0	0.4374	0.4553	0.114	-0.0745	0.98	-0.0291
Tb927.10.7090	alternative oxidase (AOX or TAO complex)	Glucose.glycerol	Tb927.10.07090	+	2611	7023	0.0054	0.933	1.2531	0.111218	1.2697	0.103	1.21	1.1419	0	0	0	0	3.2162	0.3723	0.071	2.3043	1.07	0.0976
Tb927.5.1590	hypothetical protein, conserved	ZUnknown	Tb927.05.1590	+	831	554	0.2513	0.016	0.1232	1	0.1118	0.999	1.75	1.1419	0	0	0	0	0.0723	0.1505	1.004	0.1465	1.04	0.0566
Tb927.7.6310	PLK polo-like protein kinase	Protein.kinase	Tb927.07.6310	-	4980	2600	0.2262	0.000225	1.2268	0.0033924	1.2124	0.00281	1.39	1.1397	0	0	0	1	0.659	0.4355	-0.397	-0.359	1.24	0.3103
Tb927.9.1730	Primase zinc finger/Mcm10 replication factor, putative	ZUnknown	Tb927.09.01730	-	NA	1406	0.1384	0.05	0.0679	1	0.0324	0.999	1.1	1.1397	0	0	0	0	-0.4486	0.2892	0.209	0.3593	1.09	0.1243
Tb927.3.1540	CAAX prenyl protease 2, putative,peptidase with unknown catalytic mechanism (family U48)	Protease	Tb927.03.1540	-	1855	391	0.1807	0.126	0.133	1	0.0949	0.999	1.56	1.1375	0	0	0	0	0.3879	-0.4808	0.288	0.1784	1.11	0.1506
Tb927.11.4330	hypothetical protein, conserved, no clear yeast or human matches	Mito.pathway	Tb927.11.04330	-	NA	411	0.0511	0.707	-0.0947	1	-0.1185	0.999	1.02	1.1353	0	0	0	0	-0.8457	-0.0378	0.394	-0.5051	1	0
Tb927.6.1740	Sad1 / UNC-like C-terminal, putative	ZUnknown	Tb927.06.1740	-	1476	1426	-0.2998	2.48e-05	-0.0495	1	-0.0584	0.999	1.41	1.1331	0	0	0	0	0.1401	0.1114	-0.191	0.7691	1.04	0.0566
Tb927.7.5860	hypothetical protein	ZUnknown	Tb927.07.5860	+	1344	509	-0.0202	0.887	0.3933	1	0.1717	0.999	1.25	1.1287	0	0	0	0	0.2691	-0.0279	0.953	0.2047	1.28	0.3561
Tb927.7.2150	hypothetical protein, conserved	ZUnknown	Tb927.07.2150	-	4429	3694	-0.4213	1.49e-18	-0.1122	1	-0.0246	0.999	1.33	1.1287	0	0	0	0	2.3136	0.6799	0.403	0.374	1.11	0.1506
Tb927.9.6130	calmodulin, putative	Calcium	Tb927.09.06130	+	NA	2367	0.388	7.5e-11	0.5584	0.156837	0.4823	0.135	1.59	1.1265	0	0	0	0	0.862	-0.3965	-1.03	0.7548	1.39	0.4751
Tb927.8.6450	inhibitor of cysteine peptidase (ICP)	Protease	Tb927.08.6450	+	1085	4589	-0.2454	0.00104	0.3208	1	0.2377	0.999	0.64	1.1265	0	0	0	0	1.72	0.6417	-0.621	1.8886	1.15	0.2016
Tb927.8.5590	SH3-binding, glutamic acid-rich protein, putative	ZUnknown	Tb927.08.5590	+	1798	996	0.3012	5.23e-05	0.1845	0.884627	0.1612	0.87	1.5	1.1221	0	0	0	0	0.8495	0.5612	0.705	0.087	1.15	0.2016
Tb927.7.350	hypothetical protein	ZUnknown	Tb927.07.0350	-	2531	619	0.5409	1.11e-08	0.1273	1	0.117	0.999	1.57	1.1221	0	0	0	0	2.1286	-0.1745	0.538	0.2981	1.04	0.0566
Tb927.5.2560	hypothetical protein, conserved, no known domains	ZUnknown	Tb927.05.2560	+	728	318	0.1018	0.534	-0.3698	0.546516	-0.3842	0.381	1.24	1.1221	0	0	0	0	-1.0649	-0.3923	0.521	-2.346	0.94	-0.0893
Tb927.10.13770	hypothetical protein, conserved	ZUnknown	Tb927.10.13770	-	529	409	0.2719	0.0203	0.1464	1	0.1476	0.999	0.93	1.1221	0	0	0	0	-1.2846	-0.4886	0.438	-0.6507	0.93	-0.1047
Tb927.8.2320	hypothetical protein	ZUnknown	Tb927.08.2320	+	1030	1980	-0.254	0.00239	-0.1822	1	-0.3488	0.698	0.69	1.1221	0	0	0	0	0.1295	-0.6936	-0.017	0.2938	0.88	-0.1844
Tb927.7.1250	hypothetical protein, conserved	ZUnknown	Tb927.07.1250	+	1854	2854	0.0949	0.258	0.0487	1	0.094	0.999	1.36	1.1199	0	0	0	0	0.0683	-0.0203	0.288	-0.1362	1.05	0.0704
Tb927.10.1120	hypothetical protein, conserved	ZUnknown	Tb927.10.01120	-	1930	1780	0.1504	0.0333	0.6782	0.222281	0.6181	0.106	1.54	1.1177	0	0	0	0	-0.4797	1.0389	0.352	0.1597	1.11	0.1506
Tb927.3.2060	protein kinase, putative	Protein.kinase	Tb927.03.2060	-	2959	1210	-0.1237	0.105	-0.013	1	-0.0386	0.999	1.5	1.1177	0	0	0	0	1.2924	0.7277	0.64	0.1542	1.01	0.0144
Tb11.02.5400	cystathionine beta-synthase, putative	Amino.acids	#N/A	#N/A	2070	1226	-0.1933	0.0228	-0.1105	1	#N/A	#N/A	1.33	1.1155	0	0	0	0	#N/A	0.6574	0.707	-1.637	1.18	0.2388
Tb927.11.1590	hypothetical protein, conserved	ZUnknown	Tb927.11.01590	-	NA	594	0.2192	0.0305	0.1447	1	0.1456	0.932	1.19	1.1133	0	0	0	0	-0.4917	-0.7548	0.088	-0.0196	0.88	-0.1844
Tb927.5.4330	dihydrolipoamide branched chain transacylase, putative	Mito.pathway	Tb927.05.4330	-	1763	1314	0.5598	3.64e-15	-0.0461	1	-0.0584	0.999	1.17	1.111	0	0	0	0	-0.8893	0.0166	-0.118	-1.3898	1.3	0.3785
Tb927.7.6200	chaperone DNAj, putative, J26	Chaperone	Tb927.07.6200	-	1861	449	0.0574	0.648	-0.2547	0.753108	-0.1907	0.754	1.51	1.111	0	0	0	0	-1.716	0.0655	0.72	-0.7372	0.95	-0.074
Tb927.11.1760	JmjC domain, hydroxylase, putative	ZUnknown	Tb927.11.01760	-	NA	999	0.1722	0.0277	0.0435	1	0.0316	0.999	1.14	1.1066	0	0	0	0	-0.373	0.2981	0.48	-0.1383	1.05	0.0704
Tb927.1.1230	chaperone DNAj, putative, J47	Chaperone	Tb927.01.1230	+	2214	802	-0.1435	0.114	-0.0528	1	0.0101	0.999	1.66	1.1066	0	0	0	0	-0.3584	-0.2347	0.561	0.3447	0.9	-0.152
Tb927.11.15660	hypothetical protein, conserved	ZUnknown	Tb927.11.15660	-	NA	1214	-0.1414	0.0684	-0.1772	1	-0.1726	0.834	1.8	1.1043	0	0	0	0	-0.2219	0.3044	0.201	-0.7101	1.01	0.0144
Tb927.10.6560	Protein of unknown function DUF72, putative	ZUnknown	Tb927.10.06560	+	2297	865	0.264	0.00429	0.2443	1	0.2161	0.999	1.16	1.1021	0	0	0	0	0.0223	0.6567	0.259	0.957	1.12	0.1635
Tb927.10.3230	protein kinase, putative	Protein.kinase	Tb927.10.03230	+	1674	1870	0.1358	0.0474	0.8276	1.17292e-07	0.718	2.1e-09	1.25	1.0999	0	0	0	1	0.1972	-0.229	0.044	-0.1322	2.07	1.0496
Tb927.4.2530	hypothetical protein, conserved	ZUnknown	Tb927.04.2530	+	1329	5280	-0.6462	4.29e-41	-0.4709	0.529468	-0.4833	0.445	0.98	1.0999	1	0	0	0	0.3926	-0.5759	-0.495	-0.6913	1.02	0.0286
Tb927.8.970	hypothetical protein	ZUnknown	Tb927.08.0970	-	NA	2928	1.201	2.14e-58	1.2398	0.000960256	0.6779	0.0154	1.5	1.0976	0	1	0	1	#N/A	#N/A	0.413	1.2884	1.58	0.6599
Tb927.7.5240	hypothetical protein, conserved, low homologies, no domains	ZUnknown	Tb927.07.5240	+	3452	1595	0.5164	7.05e-17	0.7957	0.237059	0.7322	0.00457	1.42	1.0931	0	0	0	0	0.5318	0.6326	0.042	0.0054	1.27	0.3448
Tb927.3.2820	TFIIF-stimulated CTD phosphatase, putative	Protein.phosphatase	Tb927.03.2820	-	2269	1630	-0.2403	0.000278	-0.1063	1	-0.1118	0.999	1.23	1.0931	0	0	0	0	0.3074	-0.2568	0.054	0.496	1.09	0.1243
Tb927.5.3290	Protein of unknown function, putative	ZUnknown	Tb927.05.3290	-	5544	4455	0.2701	7.76e-09	2.3416	1.08793e-10	2.3283	8.25e-08	1.32	1.0909	0	0	0	1	1.2104	0.9243	0.344	-0.0372	1.19	0.251
Tb927.8.1530	GPR89	Signalling	Tb927.08.1530	+	2502	1286	0.3398	4.16e-06	0.079	1	0.0376	0.999	1.12	1.0886	0	0	0	0	-0.862	-0.0445	-0.056	-0.2693	1.13	0.1763
Tb927.7.1210	regulator of chromosome condensation, putative	Cell.cycle	Tb927.07.1210	+	4345	1782	0.2555	6.84e-05	0.2016	1	0.1689	0.98	1.15	1.0886	0	0	0	0	-0.1956	0.603	0.282	-0.4176	1.09	0.1243
Tb927.1.3390	Eukaryotic protein of unknown function (DUF866), putative	ZUnknown	Tb927.01.3390	-	775	929	0.0923	0.378	-0.3923	0.152015	-0.4466	0.0665	1.16	1.0886	0	0	0	0	-0.3608	-0.4599	-1.674	-0.4367	1.07	0.0976
Tb927.9.1640	hypothetical protein, conserved	ZUnknown	Tb927.09.01640	-	NA	203	-0.0463	0.824	0.186	1	0.1005	0.999	1.92	1.0886	0	0	0	0	-0.5982	-0.3003	0.066	-0.3597	1.03	0.0426
Tb927.10.5490	HOP1 homologue, HORMA domain, involved in meiosis	DNA	Tb927.10.05490	+	1450	1051	0.3866	1.05e-06	-0.0776	1	-0.0734	0.999	1.65	1.0886	0	0	0	0	1.2882	0.2829	0.815	-0.3497	1.03	0.0426
Tb927.7.3700	hypothetical protein, conserved	ZUnknown	Tb927.07.3700	-	1299	2342	0.425	2.76e-13	1.1169	0.152368	1.1447	0.106	1.63	1.0886	0	0	0	0	1.3973	0.0349	0.152	0.5158	1.03	0.0426
Tb927.9.2760	Possible EB1-like microtubule plus-end capping protein	Cytoskeleton	Tb927.09.02760	-	NA	2490	-0.4089	4.38e-12	0.1407	1	0.1238	0.999	1.43	1.0886	0	0	0	0	-0.1142	0.2962	-0.254	0.327	0.99	-0.0145
Tb927.9.13100	ankyrin repeat protein, putative	Cytoskeleton	Tb927.09.13100	+	NA	877	0.1593	0.0824	0.2066	1	0.1928	0.999	1.17	1.0886	0	0	0	0	-0.0671	-0.106	-0.094	-0.0228	0.96	-0.0589
Tb927.11.2680	ATP synthase regulation protein NCA2, putative	ZUnknown	Tb927.11.02680	-	NA	962	-0.2109	0.0128	-0.4487	0.62058	-0.4543	0.32	1.21	1.0886	0	0	0	0	-0.3093	0.1556	0.79	-0.7199	0.93	-0.1047
Tb927.7.890	FDXA Ferredoxin	Mito.pathway	Tb927.07.0890	-	771	359	0.3845	0.00137	-0.2026	0.786069	-0.2314	0.857	1.32	1.0841	0	0	0	0	-1.3611	0.0706	1.066	-0.363	0.95	-0.074
Tb927.11.4220	palmitoyl acyltransferase 6, putative	Lipids	Tb927.11.04220	-	NA	854	-0.0468	0.618	-0.1922	0.930163	-0.2233	0.577	1.29	1.0818	0	0	0	0	-0.9943	-0.0282	0.034	-0.4213	1.28	0.3561
Tb927.3.5480	hypothetical protein, conserved	ZUnknown	Tb927.03.5480	+	1856	985	0.11	0.211	-0.0026	1	-0.0304	0.999	1.09	1.0818	0	0	0	0	0.6342	-0.2171	0.667	0.5307	0.99	-0.0145
Tb927.6.3330	hypothetical protein, conserved	ZUnknown	Tb927.06.3330	+	1080	790	0.1885	0.0316	0.1193	1	0.1304	0.831	1.29	1.0795	0	0	0	0	-1.9231	-0.0657	-0.073	-0.2394	1.21	0.275
Tb927.9.14180	chaperone DNAj, putative, J39	Chaperone	Tb927.09.14180	-	NA	1347	0.0121	0.891	-0.0842	1	-0.0687	0.999	1.67	1.0795	0	0	0	0	-0.3878	-0.2208	0.221	0.2303	1.04	0.0566
Tb927.6.5090	hypothetical protein, conserved	ZUnknown	Tb927.06.5090	+	4536	2663	0.6509	3.1e-23	0.5833	0.101925	0.4941	0.23	1.49	1.0772	0	1	0	0	-0.4277	0.736	0.5	-0.3993	1.51	0.5945
Tb927.2.5910	40S ribosomal protein S13	Ribosome	Tb927.02.5910	+	NA	15238	-0.1381	0.00172	-0.3436	0.215088	-0.3495	0.61	0.83	1.075	0	0	0	0	#N/A	#N/A	0.628	-1.0164	1.06	0.0841
Tb927.3.5140	exonuclease, putative	ZUnknown	Tb927.03.5140	+	4219	1772	0.0007	0.993	0.5218	0.805948	0.528	0.597	1.32	1.075	0	0	0	0	0.8156	0.4914	0.377	0.9609	1.05	0.0704
Tb927.10.8110	Protein of unknown function (DUF2453), putative	ZUnknown	Tb927.10.08110	-	1758	1373	0.1425	0.0762	0.1503	1	0.1694	0.762	1.77	1.0727	0	0	0	0	-0.0478	-0.3644	-0.318	0.0701	1.04	0.0566
Tb927.11.3210	hypothetical protein	ZUnknown	Tb927.11.03210	+	NA	84	-0.535	0.0319	-0.266	1	0.1311	0.999	1.17	1.0727	0	0	0	0	-0.5207	0.1002	0.524	0.276	0.79	-0.3401
Tb927.9.3100	hypothetical protein, conserved	ZUnknown	Tb927.09.03100	-	NA	1644	0.1467	0.039	-0.1175	1	-0.1621	0.999	0.93	1.0704	0	0	0	0	-0.6901	0.2958	0.541	0.2459	1.26	0.3334
Tb927.8.7280	emp24/gp25L/p24 family/GOLD, putative	Vesicular.transport	Tb927.08.7280	+	1309	520	0.7637	1.25e-14	0.5063	0.28362	0.347	0.253	1.73	1.0681	0	1	0	0	0.7887	0.7532	-0.007	0.7114	1.13	0.1763
Tb927.3.1400	alpha-tubulin N-acetyltransferase, putative	Cytoskeleton	Tb927.03.1400	+	1529	944	-0.0209	0.836	0.0601	1	0.0403	0.999	1.69	1.0681	0	0	0	0	0.4032	-0.2685	-0.302	0.1496	0.97	-0.0439
Tb927.11.2410	Flabarin, flagellar membrane protein in Leishmania & tryps	Membrane.protein	Tb927.11.02410	-	NA	440	0.1547	0.187	-0.7133	0.268742	-0.7076	0.0624	1.29	1.0635	0	0	0	0	#N/A	0.5795	1.945	-3.3875	1.02	0.0286
Tb927.11.6120	ABC transporter, putative	Transporter	Tb927.11.06120	-	NA	4894	-0.4293	2.02e-19	1.7691	8.79795e-09	1.5842	2e-08	0.51	1.0612	0	0	0	1	1.5615	1.0091	0.091	3.4695	1.6	0.6781
Tb927.5.2810	hypothetical protein, conserved	Mito.pathway	Tb927.05.2810	-	1043	493	0.0124	0.926	-0.2466	0.847761	-0.2216	0.913	1.76	1.0612	0	0	0	0	1.0571	-0.1712	0.341	-0.0779	1.1	0.1375
Tb927.4.2280	hypothetical protein, conserved	ZUnknown	Tb927.04.2280	+	1881	878	-0.0935	0.279	0.1017	1	0.1128	0.969	1.58	1.0589	0	0	0	0	-0.1027	0.2897	0.171	0.0934	0.98	-0.0291
Tb927.1.1850	hypothetical protein, conserved	ZUnknown	Tb927.01.1850	+	2148	836	-0.5906	1.36e-12	-0.1121	1	-0.0391	0.999	1.11	1.0566	1	0	0	0	0.6964	1.4449	0.401	0.4945	1.14	0.189
Tb927.5.3040	Cytochrome c Oxidase complex, MIX protein	Mito.e.transport	Tb927.05.3040	+	790	363	0.5492	2.11e-06	-0.0823	1	-0.0685	0.999	1.56	1.0566	0	0	0	0	-1.2601	-0.1835	1.167	-1.5929	1.01	0.0144
Tb927.2.6070	mitochondrial RNA binding complex 1 subunit (MRB6070)	Mito.RNA	Tb927.02.6070	+	1065	1205	0.1484	0.0432	0.0313	1	0.026	0.999	1.44	1.0566	0	0	0	0	-0.6141	-0.1946	0.033	-0.3072	0.96	-0.0589
Tb927.8.860	hypothetical protein, conserved	ZUnknown	Tb927.08.0860	-	2587	734	-0.1205	0.309	-0.0438	1	-0.1709	0.999	1.58	1.052	0	0	0	0	0.4437	0.3971	0.179	0.2626	1.29	0.3674
Tb927.1.2110	calpain-like cysteine peptidase, putative,cysteine peptidase, Clan CA, family C2, putative	Protease	Tb927.01.2110	+	2332	1198	0.5979	5.41e-14	0.6392	0.00104793	0.6326	0.0038	1.26	1.052	0	1	0	1	0.3876	1.2496	-0.579	-0.1428	1.06	0.0841
Tb927.8.7800	hypothetical protein, conserved	ZUnknown	Tb927.08.7800	+	5582	1863	-1.5115	9.1e-74	-0.1051	1	-0.1262	0.999	1.11	1.0496	1	0	0	0	0.6056	0.8409	-0.068	0.4454	1.09	0.1243
Tb927.9.7540	calpain-like cysteine peptidase, putative,cysteine peptidase, Clan CA, family C2, putative	Protease	Tb927.09.07540	-	NA	2485	-0.4396	1.33e-15	1.5376	1.42685e-10	1.4678	3.95e-12	1.05	1.0473	0	0	0	1	0.2006	0.4447	-0.256	0.553	1.45	0.5361
Tb927.10.12360	hypothetical protein, conserved	ZUnknown	Tb927.10.12360	-	663	972	-0.0195	0.854	0.4573	0.718288	0.4561	0.333	1.51	1.0473	0	0	0	0	0.3271	0.3897	-0.67	0.2668	1.08	0.111
Tb927.6.4660	cationic amino acid transporter, putative	Amino.acid.transport	Tb927.06.4660	+	2307	886	0.2068	0.0107	0.097	1	0.0625	0.999	1.42	1.0473	0	0	0	0	-1.3077	0.0432	0.174	0.0231	1.06	0.0841
Tb927.11.2170	hypothetical protein, conserved	ZUnknown	Tb927.11.02170	+	NA	827	0.0059	0.959	0.0056	1	0.0185	0.999	1.94	1.0473	0	0	0	0	-0.5103	-0.3189	0.468	0.3382	1.03	0.0426
Tb927.6.4150	hypothetical protein, conserved, tryp specific	ZUnknown	Tb927.06.4150	-	1992	403	-0.2173	0.0651	-0.2344	1	-0.218	0.959	1.26	1.0473	0	0	0	0	-1.2697	-0.0733	0.153	0.0239	1.03	0.0426
Tb927.9.11940	replication factor A protein 3, putative	ZUnknown	Tb927.09.11940	+	NA	766	0.027	0.802	0.3572	0.834383	0.3265	0.57	0.95	1.0473	0	0	0	0	-0.2562	0.4006	0.411	-0.0704	1	0
Tb927.2.1760	hypothetical protein, conserved	ZUnknown	Tb927.02.1760	+	2932	3616	0.4235	5.04e-17	-0.089	1	-0.102	0.999	1.94	1.045	0	0	0	0	-0.4796	0.3451	-0.207	-1.0318	1.09	0.1243
Tb927.10.15020	YAK protein kinase	Protein.kinase	Tb927.10.15020	+	5253	4106	-0.1408	0.00401	1.2567	9.4368e-06	1.2001	4.45e-08	0.73	1.045	0	0	0	1	0.6791	0.5743	-0.187	0.57	1.07	0.0976
Tb927.2.3080	fatty acid desaturase, putative,oleate desaturase, putative	Lipids	Tb927.02.3080	+	1464	4183	-0.7151	1.64e-33	-0.1562	1	-0.163	0.999	0.75	1.0426	1	0	0	0	0.2014	0.5605	0.139	0.7504	0.87	-0.2009
Tb927.7.4400	IP6K IP6 kinase	Signalling	Tb927.07.4400	-	4082	1473	-0.2198	0.00277	0.152	1	0.103	0.999	1.14	1.0403	0	0	0	0	0.4621	1.1964	0.601	0.0519	1.25	0.3219
Tb927.10.5220	hypothetical protein, possible component of cytochorome oxidase complex	Mito.e.transport	Tb927.10.05220	+	2055	1048	0.1466	0.0983	-0.1565	1	-0.1679	0.999	1.12	1.0403	0	0	0	0	-2.4011	-0.1797	0.32	-1.746	0.86	-0.2176
Tb927.6.2940	phosphopantothenoylcysteine decarboxylase, putative (PPCDC)	Enzyme	Tb927.06.2940	+	1208	1094	-0.2011	0.00858	-0.1009	1	-0.1149	0.999	1.3	1.038	0	0	0	0	-0.6292	-0.4858	0.336	-0.3707	1.18	0.2388
Tb927.4.1840	Carboxypeptidase Nna1-like protein, putative	Protease	Tb927.04.1840	-	3130	4048	-0.1325	0.0141	0.4408	0.580881	0.4467	0.554	1.45	1.038	0	0	0	0	1.5781	0.9234	-0.042	0.6888	1.06	0.0841
Tb927.10.810	pentatricopeptide repeat domain containing protein, putative	ZUnknown	Tb927.10.00810	+	2877	2186	-0.1151	0.0662	-0.0025	1	-0.0137	0.999	1.17	1.038	0	0	0	0	0.4281	0.1352	0.265	-0.1364	1.04	0.0566
Tb927.11.5710	chaperone DNAj, putative, J29	Chaperone	Tb927.11.05710	+	NA	808	0.0545	0.608	0.094	1	0.2525	0.631	1.35	1.038	0	0	0	0	0.7973	-0.0387	0.52	0.1747	1.01	0.0144
Tb927.3.1570	protein kinase, LBPK3	Protein.kinase	Tb927.03.1570	-	3208	1925	0.316	2.12e-07	0.4673	0.847966	0.4706	0.762	1.42	1.0356	0	0	0	0	0.6447	0.1799	0.513	0.1723	1.16	0.2141
Tb927.11.10470	hypothetical protein, conserved	ZUnknown	Tb927.11.10470	+	NA	2027	0.7343	7.22e-38	1.3	6.03418e-06	1.0154	4.69e-12	0.9	1.0333	0	1	0	1	-0.8397	0.7818	0.111	1.1748	2.06	1.0426
Tb927.8.910	hypothetical protein, conserved, Qn domains, PRK14951 domain (DNA polymerase III subunits gamma and tau, E= -3), kinetoplastid specific	ZUnknown	Tb927.08.0910	-	1812	4975	-0.572	1.01e-22	2.3108	4.71368e-07	1.9804	1.8e-07	1.61	1.0333	0	0	0	1	0.4023	0.3443	-0.241	1.2424	2	1
Tb927.7.7100	hypothetical protein	ZUnknown	Tb927.07.7100	-	6866	3595	0.023	0.742	0.6564	0.751874	0.5656	0.432	1.18	1.0333	0	0	0	0	0.3629	1.0859	0.485	0.9169	1.65	0.7225
Tb927.3.1930	CDC40 / PRP17	RNA.processing	Tb927.03.1930	-	1850	1208	0.1462	0.0494	-0.1812	1	-0.178	0.999	1.53	1.0333	0	0	0	0	-0.9229	-0.0054	0.712	-0.3725	1.27	0.3448
Tb927.8.1620	MSP-B, putative	Membrane.protein	Tb927.08.1620	+	2076	7489	0.5149	1.48e-28	-0.2704	0.994489	#N/A	#N/A	1.82	1.0309	0	0	0	0	-1.7581	0.3063	0.593	-1.4906	1	0
Tb927.7.3720	hypothetical protein	ZUnknown	Tb927.07.3720	+	NA	702	-0.6086	0.0196	3.673	4.43337e-08	2.6939	2.76e-10	0.58	1.0309	1	0	0	1	#N/A	#N/A	0.054	0.8564	0.87	-0.2009
Tb927.11.5530	Mitochondrial LSU-associated	Mito.pathway	Tb927.11.05530	+	NA	620	-0.0443	0.709	-0.1167	1	-0.0969	0.999	1.17	1.0262	0	0	0	0	-1.2286	-0.2319	0.563	0.0402	1.3	0.3785
Tb927.11.1060	Vasohibin, putative	ZUnknown	Tb927.11.01060	+	NA	1491	0.086	0.232	0.4782	0.191838	0.5065	0.00216	1.05	1.0262	0	0	0	0	0.6395	-0.2307	-0.107	-0.054	1.2	0.263
Tb927.6.2700	small nuclear ribonucleoprotein Sm-E	RNA.processing	Tb927.06.2700	+	1486	646	-0.3724	0.00195	-0.5908	0.175248	-0.613	0.00708	0.6	1.0262	0	0	0	0	0.5002	-0.4418	0.492	-0.4588	0.95	-0.074
Tb927.5.3570	hypothetical protein, conserved	ZUnknown	Tb927.05.3570	+	1568	727	-0.0347	0.757	0.1061	1	0.0848	0.999	1.71	1.0238	0	0	0	0	-0.4374	-0.0668	0.175	-0.3364	1.28	0.3561
Tb927.4.3760	hypothetical protein	ZUnknown	Tb927.04.3760	-	1206	480	-0.7495	5.6e-13	0.4759	0.9943	0.616	0.811	1.13	1.0238	1	0	0	0	1.1871	-0.4627	-0.68	0.6563	1.1	0.1375
Tb927.10.8070	ATPase, putative	Enzyme	Tb927.10.08070	-	1715	1449	0.225	0.000917	0.0946	1	0.0856	0.879	1.47	1.0238	0	0	0	0	-0.3323	-0.0231	-0.017	0.7999	1.09	0.1243
Tb927.4.1900	Methyltransferase domain/Methyltransferase involved in Williams-Beuren syndrome, putative	ZUnknown	Tb927.04.1900	-	2018	1172	-0.1895	0.033	-0.1742	1	-0.1685	0.691	1.34	1.0238	0	0	0	0	-0.9862	0.1331	0.704	-0.2093	1.08	0.111
Tb927.5.440	trans-sialidase, putative	Membrane.protein	Tb927.05.0440	-	2935	1220	0.5797	6.65e-18	-0.5225	0.836216	-0.5117	0.982	1.41	1.0215	0	0	0	0	-2.3818	0.8106	2.1	-4.0339	1.21	0.275
Tb927.11.12440	Plus-3 domain/Zinc finger, C3HC4 type (RING finger), putative	ZUnknown	Tb927.11.12440	+	NA	1154	0.2389	0.00158	-0.0334	1	-0.0717	0.999	1.86	1.0215	0	0	0	0	0.2737	0.3438	0.381	-0.5565	1.11	0.1506
Tb927.4.1780	hypothetical protein, conserved	ZUnknown	Tb927.04.1780	-	1554	1040	0.011	0.908	0.0581	1	0.0506	0.999	1.62	1.0215	0	0	0	0	0.9032	-0.158	0.111	0.7	1.02	0.0286
Tb927.1.820	kelch domain-containing protein	ZUnknown	Tb927.01.0820	-	1620	1075	-0.076	0.399	0.1	1	0.0729	0.999	1.19	1.0191	0	0	0	0	0.2913	0.2274	0.596	0.3543	1.11	0.1506
Tb927.9.1540	protein phosphatase 2B, putative	Protein.phosphatase	Tb927.09.01540	-	NA	1284	0.2556	0.000314	0.3976	0.624243	0.3656	0.424	1.13	1.0167	0	0	0	0	0.2471	0.0218	-0.011	0.7604	1.03	0.0426
Tb927.5.2620	hypothetical protein, conserved, ubiquitin-like C-terminus, no yeast or human match	ZUnknown	Tb927.05.2620	+	5663	2821	0.6186	2.27e-28	1.6105	0.00292279	1.5479	0.00546	1.31	1.0096	0	1	0	1	1.0894	0.9404	0.122	0.6114	1.45	0.5361
Tb927.7.2140	ZC3H18	RNA.binding	Tb927.07.2140	-	7384	2480	-1.0483	6.12e-79	-0.2039	1	-0.3408	0.956	1.29	1.0096	1	0	0	0	0.581	0.6389	-0.065	0.7518	1.21	0.275
Tb927.10.12730	hypothetical protein	ZUnknown	Tb927.10.12730	-	NA	487	0.0637	0.685	-0.0037	1	-0.0937	0.999	0.98	1.0072	0	0	0	0	#N/A	#N/A	0.581	-0.5357	1.14	0.189
Tb927.9.10300	hypothetical protein, conserved	ZUnknown	Tb927.09.10300	-	NA	683	0.1452	0.13	-0.0833	1	-0.0508	0.999	1.43	1.0072	0	0	0	0	-1.3616	-0.1024	0.824	-0.0963	0.96	-0.0589
Tb927.10.3430	hypothetical protein, conserved	ZUnknown	Tb927.10.03430	+	2026	1500	0.0562	0.477	-0.2263	1	-0.2216	0.908	1.1	1.0048	0	0	0	0	-0.5393	0.2784	0.151	-0.502	1.18	0.2388
Tb927.10.3750	Endonuclease/Exonuclease/phosphatase family, putative	ZUnknown	Tb927.10.03750	-	2988	1585	0.3044	1.54e-06	0.7909	0.132477	0.7191	0.00021	1.49	1.0024	0	0	0	0	1.1262	0.6891	0.86	2.4139	1.16	0.2141
Tb927.5.2700	otubain cysteine peptidase, Clan CA, family C65, putative	Protease	Tb927.05.2700	+	1314	1031	-0.2281	0.0023	-0.2603	0.538255	-0.2448	0.222	1.31	1.0024	0	0	0	0	0.0061	0.0336	0.083	-0.6635	1.07	0.0976
Tb927.9.13240	hypothetical protein, conserved	ZUnknown	Tb927.09.13240	-	NA	687	0.2059	0.0236	0.5691	0.0138301	0.3392	0.0517	1.5	1	0	0	0	0	0.255	0.4059	-0.143	0.5718	1.11	0.1506
Tb927.8.1780	protein kinase, putative	Protein.kinase	Tb927.08.1780	-	5993	1825	0.3517	2.2e-09	1.2485	0.0763886	0.7932	0.0457	0.93	0.9976	0	0	0	0	1.1237	1.4109	0.586	1.7024	0.88	-0.1844
Tb927.3.4450	hypothetical protein, conserved	ZUnknown	Tb927.03.4450	-	1399	616	-0.4808	8.97e-08	-0.3112	1	-0.308	0.959	1.08	0.9952	0	0	0	0	-0.1608	0.025	0.613	-0.2254	1.08	0.111
Tb927.11.14160	Alpha/beta hydrolase family, putative	ZUnknown	Tb927.11.14160	+	NA	899	0.0798	0.392	0.4026	0.167668	0.3984	0.00235	1.41	0.9928	0	0	0	0	-0.0442	-0.7673	0.313	-0.1059	1.1	0.1375
Tb927.11.15530	C-14 sterol reductase, putative	Sterols	Tb927.11.15530	-	NA	731	0.4334	3.3e-06	-0.4285	0.894214	-0.4362	0.623	1.18	0.9903	0	0	0	0	-1.5814	0.6824	0.276	-2.0338	0.93	-0.1047
Tb927.11.1360	zinc-finger of a C2HC-type, putative	Zinc.finger	Tb927.11.01360	+	NA	1278	-1.1132	6.07e-60	-0.2756	0.849968	-0.2827	0.623	1.86	0.9879	1	0	0	0	1.5585	-0.0877	0.133	0.8368	0.95	-0.074
Tb927.9.11050	4E-IP, 4EIP, 4E-interacting protein, putative	Translation	Tb927.09.11050	-	NA	4077	0.0419	0.541	1.105	0.000443653	1.2656	1.09e-05	1.45	0.9855	0	0	0	1	0.541	0.4974	0.048	0.4646	1.22	0.2869
Tb927.6.3950	hypothetical protein, conserved	ZUnknown	Tb927.06.3950	-	2375	696	-0.383	2.45e-05	-0.192	1	-0.1927	0.691	1.13	0.9855	0	0	0	0	0.3388	-0.7059	-0.381	0.1381	1.02	0.0286
Tb927.9.4130	hypothetical protein, conserved	ZUnknown	Tb927.09.04130	+	NA	1460	0.3032	0.159	2.3553	8.57838e-06	2.6968	5.45e-12	0.79	0.9855	0	0	0	1	0.1452	0.6331	-0.325	0.1159	0.79	-0.3401
Tb927.11.14940	hypothetical protein, conserved	ZUnknown	Tb927.11.14940	-	NA	967	0.1799	0.0309	-0.114	1	-0.1233	0.98	1.44	0.9806	0	0	0	0	0.4312	-0.004	0.781	-0.5064	1.28	0.3561
Tb927.10.3530	hypothetical protein, conserved	ZUnknown	Tb927.10.03530	+	1978	812	0.0681	0.56	0.127	1	0.1261	0.999	1.77	0.9806	0	0	0	0	0.4206	0.319	-0.022	1.587	1.02	0.0286
Tb927.11.4660	kinesin, MCAK-like KIF13-2, tip of flagellum	Cytoskeleton	Tb927.11.04660	+	NA	2046	0.2465	2.31e-05	0.3782	1	0.3632	0.915	1.3	0.9806	0	0	0	0	1.3708	0.5332	0.074	0.4916	0.95	-0.074
Tb927.5.3310	hypothetical protein, conserved	ZUnknown	Tb927.05.3310	-	1961	1204	0.0489	0.58	0.141	1	0.0632	0.999	1.51	0.9782	0	0	0	0	-0.0727	0.1137	-0.022	0.0763	1.38	0.4647
Tb927.11.6440	hypothetical protein, conserved, Bromodomain and poly(Q), often in TAP MS, low similarity to coiled-coil proteins and hook proteins (cytoskeletal linkers)	ZUnknown	Tb927.11.06440	-	NA	7243	-0.7147	1.66e-47	0.061	1	0.124	0.999	1.31	0.9782	1	0	0	0	1.3019	0.4902	0.19	-0.7644	0.92	-0.1203
Tb927.10.13890	hypothetical protein, conserved	ZUnknown	Tb927.10.13890	-	2570	938	0.0578	0.546	0.0676	1	0.0459	0.999	1.16	0.9758	0	0	0	0	0.1951	0.1765	0.376	0.2758	1.1	0.1375
Tb927.4.4540	zinc finger domain, LSD1 subclass, putative	Zinc.finger	Tb927.04.4540	-	543	772	-0.1182	0.198	-0.2426	0.73715	-0.2732	0.276	1.12	0.9758	0	0	0	0	1.2584	-0.2991	0.101	1.1246	1.07	0.0976
Tb927.3.2180	Mitochondrial ATP synthase subunit, putative	Mito.pathway	Tb927.03.2180	-	1017	1250	0.2442	0.000505	-0.0358	1	-0.0448	0.999	1.07	0.9758	0	0	0	0	-1.5323	-0.0685	0.042	-1.8	0.99	-0.0145
Tb927.11.930	hypothetical protein, conserved	ZUnknown	Tb927.11.0930	+	NA	1913	0.1741	0.00833	0.4265	0.754711	0.3798	0.193	1.07	0.9733	0	0	0	0	-0.0245	0.6517	0.33	0.4651	1.11	0.1506
Tb927.8.3550	MAPK3 protein kinase	Protein.kinase	Tb927.08.3550	-	4668	3151	0.0861	0.127	1.6082	2.75479e-06	1.3812	3.42e-05	1.32	0.9709	0	0	0	1	1.5859	0.4249	-0.452	0.823	1.68	0.7485
Tb927.2.2940	MIC32	Mito.biogenesis	Tb927.02.2940	+	1211	527	-0.1155	0.295	-0.1166	1	-0.136	0.999	1.33	0.9709	0	0	0	0	-0.8897	-0.2637	0.374	-0.3069	0.92	-0.1203
Tb927.11.12200	hypothetical protein, conserved	ZUnknown	Tb927.11.12200	+	NA	353	-0.0304	0.859	-0.1108	1	-0.0823	0.999	1.45	0.9684	0	0	0	0	-0.1918	0.2548	0.837	-0.8102	0.97	-0.0439
Tb927.10.820	hypothetical protein, conserved	ZUnknown	Tb927.10.00820	+	3541	1465	0.0402	0.606	0.1023	1	0.0771	0.999	1.46	0.9659	0	0	0	0	0.5138	0.1353	-0.337	0.0835	1.12	0.1635
Tb927.11.1650	hypothetical protein, conserved	ZUnknown	Tb927.11.01650	-	NA	535	-0.338	0.000836	-0.1178	1	-0.138	0.875	1.37	0.9659	0	0	0	0	-0.647	-0.294	0.535	-0.749	0.96	-0.0589
Tb927.7.5360	Haemolysin-III related, putative	ZUnknown	Tb927.07.5360	+	1159	646	0.0542	0.606	0.0006	1	0.0126	0.999	1.76	0.9635	0	0	0	0	0.4523	-0.4204	-0.36	-0.0276	1.07	0.0976
Tb927.10.14500	hypothetical protein, conserved	ZUnknown	Tb927.10.14500	-	2506	3891	-0.1989	0.0012	0.0245	1	0.0407	0.999	1.32	0.9635	0	0	0	0	0.2745	-0.3976	-1.403	-0.2064	1.01	0.0144
Tb927.10.9730	hypothetical protein, conserved	ZUnknown	Tb927.10.09730	+	1523	1663	-0.4943	2.1e-13	-0.5057	0.151333	-0.5281	0.0808	1.59	0.9635	0	0	0	0	-0.3629	-0.6295	-1.278	-0.8506	0.97	-0.0439
Tb927.7.2480	peptidyl-prolyl cis-trans isomerase, putative (PAR45)	Chaperone	Tb927.07.2480	-	1441	942	-0.0964	0.284	-0.5178	0.0704558	-0.5188	0.0325	1.72	0.9635	0	0	0	0	-0.7815	-0.2707	0.101	-0.3747	0.95	-0.074
Tb927.11.5600	ATOM14 - POMP14	Mito.biogenesis	Tb927.11.05600	+	NA	591	-0.1295	0.225	-0.0744	1	-0.1188	0.999	0.82	0.961	0	0	0	0	-1.2711	-0.1575	0.977	-1.2213	1.03	0.0426
Tb927.3.4470	hypothetical protein, conserved	ZUnknown	Tb927.03.4470	-	1609	1167	-0.0553	0.517	-0.0358	1	-0.0317	0.999	1.45	0.961	0	0	0	0	-0.7806	0.0512	0.294	0.147	0.99	-0.0145
Tb927.3.4560	AMPKalpha2	Protein.kinase	Tb927.03.4560	-	3770	2791	0.2141	7.11e-05	1.1054	0.000116983	1.1146	0.0441	1.24	0.961	0	0	0	1	#N/A	0.7487	-0.093	0.282	0.96	-0.0589
Tb927.8.7720	hypothetical protein, conserved	ZUnknown	Tb927.08.7720	+	4866	1098	0.171	0.0306	0.9921	0.467665	0.311	0.792	1.36	0.9585	0	0	0	0	2.0681	0.6388	0.573	2.9115	1.6	0.6781
Tb927.10.2900	importin beta-1 subunit, putative	Nuclear.transport	Tb927.10.02900	+	4834	4749	-1.0225	4.08e-115	-0.5179	0.857735	-0.4904	0.57	1.21	0.9561	1	0	0	0	0.5289	0.6103	0.407	-0.4868	1.09	0.1243
Tb927.8.2020	agmatinase, putative	Amino.acids	Tb927.08.2020	+	1305	1045	0.2797	0.000301	-0.1221	0.969048	-0.1343	0.949	1.47	0.9536	0	0	0	0	-0.858	0.2674	0.46	-0.4673	1.12	0.1635
Tb927.8.8270	hypothetical protein, conserved	ZUnknown	Tb927.08.8270	+	5702	1571	-1.5336	2.26e-128	-0.1498	1	-0.3603	0.337	0.94	0.9536	1	0	0	0	1.4694	0.7771	0.769	1.5704	0.96	-0.0589
Tb927.5.1660	protein phosphatase 2C, putative	Protein.phosphatase	Tb927.05.1660	+	1923	3943	0.0028	0.977	0.2882	1	0.1159	0.999	0.98	0.9511	0	0	0	0	0.6392	0.4858	0.089	-0.2742	3.13	1.6462
Tb927.11.2340	hypothetical protein, conserved	ZUnknown	Tb927.11.02340	+	NA	2043	0.224	0.000117	0.3126	0.972946	0.3608	0.408	1.22	0.9511	0	0	0	0	0.098	0.159	0.037	0.1253	1.11	0.1506
Tb927.9.1650	hypothetical protein, conserved	ZUnknown	Tb927.09.01650	-	NA	647	0.1289	0.202	-0.2412	0.697781	-0.2856	0.368	1.3	0.9511	0	0	0	0	-1.5091	-0.2458	0.823	-0.4677	1.1	0.1375
Tb927.7.2260	SEP domain containing protein, putative	ZUnknown	Tb927.07.2260	-	1454	1218	-0.2365	0.00153	-0.3023	0.261807	-0.3145	0.0911	1.11	0.9511	0	0	0	0	-0.0378	-0.2777	-0.022	0.3025	1.09	0.1243
Tb927.9.15320	hypothetical protein, conserved	ZUnknown	Tb927.09.15320	+	NA	236	0.3991	0.408	0.3244	1	0.3623	0.958	0.77	0.9511	0	0	0	0	#N/A	#N/A	0.328	-1.3125	1.01	0.0144
Tb927.10.12400	membrane transporter protein, putative	Transporter	Tb927.10.12400	-	1507	798	0.0171	0.879	-0.4468	0.918341	-0.433	0.824	1.27	0.9511	0	0	0	0	-0.7661	1.4458	0.902	-0.7815	1	0
Tb927.10.7310	terminal uridylyltransferase 3, putative (TUT3)	RNA.processing	Tb927.10.07310	-	2670	1981	-0.1544	0.0133	0.0697	1	0.0724	0.999	0.78	0.9511	0	0	0	0	-0.0259	-0.0637	-0.205	-0.0735	0.98	-0.0291
Tb927.10.3670	hypothetical protein, conserved	ZUnknown	Tb927.10.03670	-	2248	2120	-0.0961	0.173	-0.1083	1	-0.1225	0.995	1.29	0.9486	0	0	0	0	0.58	-0.1004	0.016	0.98	1.09	0.1243
Tb927.11.1560	1,2-Dihydroxy-3-keto-5-methylthiopentene dioxygenase, putative	Amino.acids	Tb927.11.01560	-	NA	2208	-0.4145	2.13e-10	-0.4499	0.270097	-0.464	0.144	1	0.9486	0	0	0	0	-0.7703	0.0001	0.296	-0.9102	1.09	0.1243
Tb927.11.5420	hypothetical protein, conserved	ZUnknown	Tb927.11.05420	+	NA	1150	-0.1417	0.0916	-0.0851	1	-0.1	0.999	1.34	0.9486	0	0	0	0	-0.4452	0.0269	0.325	0.0307	0.94	-0.0893
Tb927.10.16010	hypothetical protein	ZUnknown	Tb927.10.16010	+	1612	31	0.2948	0.507	0.2867	1	0.1474	0.999	1.05	0.9436	0	0	0	0	-0.41	0.6929	0.91	1.1805	1.71	0.774
Tb927.9.14140	hypothetical protein, conserved	ZUnknown	Tb927.09.14140	-	NA	826	0.3216	0.000434	0.0776	1	0.0725	0.999	1.55	0.9411	0	0	0	0	-0.9815	-0.2685	0.026	-0.7501	1.18	0.2388
Tb927.6.1820	Dolichyl pyrophosphate phosphatase	Glycans	Tb927.06.1820	-	980	1046	0.0846	0.349	0.0888	1	0.0816	0.999	0.99	0.9411	0	0	0	0	-0.0755	-1.0267	-0.054	-0.0017	1.14	0.189
Tb927.5.520	stomatin-like protein, putative	Mito.pathway	Tb927.05.0520	-	3800	1531	-0.4491	4.88e-10	0.0168	1	0.0102	0.999	1.24	0.9411	0	0	0	0	-0.5914	0.6273	0.484	-0.5449	1.06	0.0841
Tb927.10.15130	synaptobrevin-type vesicle transport protein, SLY2 (SEC22)	Vesicular.transport	Tb927.10.15130	+	1564	1036	-0.3068	0.00055	-0.106	1	-0.1567	0.758	1.17	0.9411	0	0	0	0	0.7846	-0.2473	0.019	0.1744	1.04	0.0566
Tb927.10.15450	hypothetical protein, conserved	ZUnknown	Tb927.10.15450	+	1449	1011	0.0425	0.655	0.0459	1	0.0038	0.999	1.13	0.9411	0	0	0	0	-0.1618	0.2746	0.338	0.6348	0.99	-0.0145
Tb927.7.5710	hypothetical protein, conserved	ZUnknown	Tb927.07.5710	+	1294	645	-0.2343	0.023	-0.0449	1	-0.0611	0.999	1.18	0.9411	0	0	0	0	-0.6268	-0.1885	0.418	-0.1619	0.98	-0.0291
Tb927.10.13480	protein kinase, putative	Protein.kinase	Tb927.10.13480	-	NA	1532	0.2896	4.74e-06	0.2162	0.93512	0.2061	0.636	1.72	0.9386	0	0	0	0	#N/A	#N/A	0.238	0.5667	1.05	0.0704
Tb927.4.5310	NEK12.3 protein kinase (RDK2)	Protein.kinase	Tb927.04.5310	-	NA	3887	0.2035	0.000966	0.7637	0.332129	0.6467	0.519	1.2	0.9336	0	0	0	0	#N/A	#N/A	0.084	2.6709	1.34	0.4222
Tb927.10.12740	ZC3H35	RNA.binding	Tb927.10.12740	-	2941	1610	0.1496	0.0474	0.1546	1	0.1452	0.999	1.35	0.9336	0	0	0	0	-0.431	1.1187	0.46	-0.5677	1.11	0.1506
Tb927.10.6810	guanylate kinase, putative	Nucleotides	Tb927.10.06810	+	1853	942	-0.3501	4.5e-06	-0.0797	1	-0.0572	0.999	1.4	0.9336	0	0	0	0	-0.5999	-0.3023	0.112	-0.6616	1.1	0.1375
Tb927.9.6470	hypothetical protein, conserved	ZUnknown	Tb927.09.06470	+	NA	976	0.207	0.0305	0.5934	0.776896	0.55	0.81	0.94	0.9336	0	0	0	0	0.3619	0.284	0.214	0.2662	0.88	-0.1844
Tb927.10.1440	hypothetical protein, conserved	ZUnknown	Tb927.10.01440	-	1296	998	0.1449	0.0857	0.0839	1	0.0948	0.991	1.29	0.9311	0	0	0	0	-0.9737	-0.0486	0.334	-0.5379	1.1	0.1375
Tb927.4.3320	uracil phosphoribosyltransferase, putative	Nucleotides	Tb927.04.3320	-	868	2713	0.6569	8.13e-20	0.7585	0.179055	0.7368	0.155	1.25	0.9311	0	1	0	0	-0.3062	0.2265	-0.095	-0.8281	1.05	0.0704
Tb927.9.4080	hypothetical protein, conserved, DRBD3, 4E5/G1 interaction. P-loop NTP hydrolase (AAA ATPase), DNA ligase/capping enzyme catalytic domain, C4 zinc finger (LIM domain)	Translation	Tb927.09.04080	+	NA	5966	0.1319	0.0304	2.5056	5.22676e-22	2.5248	2.41e-18	0.51	0.9311	0	0	0	1	0.6529	0.911	-0.096	0.1232	0.97	-0.0439
Tb927.11.1230	hypothetical protein, conserved	ZUnknown	Tb927.11.01230	+	NA	2822	0.1501	0.0502	1.5562	4.43737e-05	1.2176	0.0102	1.3	0.9285	0	0	0	1	2.568	0.384	0.172	4.0463	1.18	0.2388
Tb927.3.4170	CRK9AP	RNA.processing	Tb927.03.4170	-	784	366	0.1616	0.224	0.1188	1	0.0348	0.999	1.17	0.9285	0	0	0	0	-0.6823	0.1296	0.038	0.2898	1.02	0.0286
Tb927.6.4680	hypothetical protein, conserved	ZUnknown	Tb927.06.4680	+	2198	914	0.0925	0.313	0.0568	1	0.066	0.999	1.58	0.9285	0	0	0	0	-0.0737	0.3677	0.529	0.5016	0.98	-0.0291
Tb927.9.7480	hypothetical protein, conserved	ZUnknown	Tb927.09.07480	-	NA	1392	-0.6915	1.02e-26	-0.2767	0.408511	-0.2751	0.431	1.71	0.926	1	0	0	0	1.3208	0.2201	-0.195	0.7664	1.13	0.1763
Tb927.7.3760	phosphatidylserine synthase, putative	Lipids	Tb927.07.3760	-	2808	2488	-0.6074	7.34e-31	-0.1221	1	-0.1911	0.805	1.32	0.9235	1	0	0	0	0.8131	0.2782	0.167	-0.3931	1.2	0.263
Tb927.4.2650	Regulator of chromosome condensation (RCC1) repeat, putative	ZUnknown	Tb927.04.2650	+	3322	1146	-0.2508	0.000636	-0.0246	1	-0.0956	0.999	1.02	0.9235	0	0	0	0	-0.3631	0.8922	0.846	0.2602	1.02	0.0286
Tb927.4.1430	hypothetical protein, conserved	ZUnknown	Tb927.04.1430	-	1756	1656	0.1432	0.032	0.0025	1	0.0025	0.999	1.81	0.9209	0	0	0	0	0.4802	-0.2075	-0.478	-0.0649	1.02	0.0286
Tb927.10.11220	procyclic form surface glycoprotein (PSSA-2)	Membrane.protein	Tb927.10.11220	-	1616	826	0.591	1.15e-13	-0.2444	0.839106	-0.2528	0.857	1.17	0.9209	0	1	0	0	-2.1364	0.7227	1.794	-1.9374	0.96	-0.0589
Tb927.6.1510	lysyl-tRNA synthetase, putative	Translation.tRNA	Tb927.06.1510	-	2831	1484	0.0405	0.63	0.1441	1	0.0361	0.999	1.61	0.9184	0	0	0	0	-0.3641	0.2077	0.609	0.0651	1.91	0.9336
Tb927.6.4180	POMP32	Mito.membrane	Tb927.06.4180	-	1323	1344	-0.339	5.6e-06	0.2075	0.816065	0.0398	0.999	1.18	0.9184	0	0	0	0	-0.1149	-0.8277	-0.807	0.0406	1.38	0.4647
Tb927.5.1070	hypothetical protein, conserved	Cytoskeleton	Tb927.05.1070	+	2989	2802	0.6063	3.12e-28	1.1624	9.14671e-05	1.1627	0.000289	0.67	0.9184	0	1	0	1	#N/A	0.7008	-0.249	0.36	1.15	0.2016
Tb927.7.5840	hypothetical protein, conserved	ZUnknown	Tb927.07.5840	+	1975	1853	0.4879	2.81e-13	0.0265	1	0.0112	0.999	1.2	0.9184	0	0	0	0	-0.4328	-0.1307	0.566	0.0663	0.98	-0.0291
Tb927.7.5450	lipin, phosphatidic acid phosphatase	Lipids	Tb927.07.5450	+	4098	2661	-0.2806	4.73e-07	0.377	1	0.3712	0.272	0.78	0.9158	0	0	0	0	0.7217	0.9002	0.546	1.0073	1.1	0.1375
Tb927.1.2970	hypothetical protein, conserved	ZUnknown	Tb927.01.2970	+	769	753	-0.0034	0.977	-0.1216	1	-0.1391	0.999	0.82	0.9158	0	0	0	0	0.4958	-0.4098	-0.277	0.3696	1.03	0.0426
Tb927.1.5030	leucine-rich repeat protein (LRRP)	LRRP	Tb927.01.5030	+	2251	1561	-0.0699	0.389	0.1185	1	0.0955	0.956	1.03	0.9133	0	0	0	0	0.1784	-0.0024	-1.009	0.1132	1.01	0.0144
Tb927.8.3330	mitochondrial carrier protein, MCP18	Mito.transport	Tb927.08.3330	+	1746	907	-0.4386	3.68e-07	-0.0846	1	-0.1138	0.999	1.7	0.9107	0	0	0	0	0.7097	0.0992	0.439	0.2712	1.09	0.1243
Tb927.1.570	DOT1B Histone-lysine N-methyltransferase, H3 lysine-76 specific (DOT1B)	Chromatin	Tb927.01.0570	-	1225	996	-0.0751	0.389	-0.1	1	-0.1221	0.956	1.07	0.9056	0	0	0	0	-1.6509	-0.8028	-0.248	-1.0848	1.23	0.2987
Tb927.5.1080	RBP22	RNA.binding	Tb927.05.1080	+	1258	425	-0.2778	0.0264	-0.2615	0.728591	-0.2799	0.66	1.57	0.9056	0	0	0	0	-0.3538	0.1962	0.635	0.0412	1.04	0.0566
Tb927.10.12670	Hypothetical conserved in trypanosoma, Leish match not syntenic	ZUnknown	Tb927.10.12670	-	4131	3844	-0.0005	0.994	0.2283	1	0.3121	0.86	1.8	0.9056	0	0	0	0	2.2115	-0.2104	-0.73	-0.2281	1	0
Tb927.9.3170	cytochrome oxidase subunit V (COXV)	Mito.e.transport	Tb927.09.03170	-	NA	971	0.4449	1.9e-07	-0.0555	1	-0.0635	0.999	1.14	0.9056	0	0	0	0	-2.4454	-0.5219	0.281	-2.2927	0.98	-0.0291
Tb927.1.4250	hypothetical protein, conserved	ZUnknown	Tb927.01.4250	+	2373	1359	-0.0803	0.273	-0.0024	1	-0.009	0.999	1.09	0.903	0	0	0	0	-0.1101	0.0009	0.327	-0.0309	1.06	0.0841
Tb927.11.3170	Der1-like family, putative	ZUnknown	Tb927.11.03170	-	NA	656	0.2656	0.0033	-0.0552	1	-0.0564	0.999	1.53	0.903	0	0	0	0	0.1063	0.1169	0.4	0.2223	1.01	0.0144
Tb927.3.1090	U1-24K small nuclear ribonucleoprotein	RNA.processing	Tb927.03.1090	+	2319	494	-0.1031	0.423	-0.3136	0.705931	-0.2857	0.265	1.14	0.903	0	0	0	0	-0.1244	0.2124	0.15	-0.0283	0.98	-0.0291
Tb927.10.350	BBP59	Cytoskeleton	Tb927.10.00350	+	3205	1400	0.1729	0.0339	0.8754	0.132396	0.7304	0.206	1.42	0.9005	0	0	0	0	0.5219	0.7111	0.632	0.2469	1.18	0.2388
Tb927.5.3660	hypothetical protein, conserved	ZUnknown	Tb927.05.3660	+	2425	1277	-0.4921	6.69e-14	0.6253	0.0476538	0.5867	0.0647	1.29	0.8979	0	0	0	1	2.0504	0.2066	-0.41	2.3415	1.15	0.2016
Tb927.8.5280	mitochondrial ribosomal protein s34	Mito.translation	Tb927.08.5280	+	1423	1208	0.0858	0.304	-0.1838	0.925166	-0.168	0.917	1.46	0.8979	0	0	0	0	-0.9651	-0.4004	-0.498	-0.3641	1.13	0.1763
Tb927.10.9680	SET9	ZUnknown	Tb927.10.09680	+	2456	1258	-0.02	0.824	0.009	1	-0.0189	0.999	0.93	0.8979	0	0	0	0	-0.3769	0.3742	0.578	0.0428	1.01	0.0144
Tb927.9.12680	hypothetical protein, conserved, weak ubiquinone oxidoreductase subunit domain	ZUnknown	Tb927.09.12680	+	NA	669	0.3937	3.29e-05	0.1605	1	0.1621	0.999	1.39	0.8979	0	0	0	0	-1.6319	0.2943	0.284	-0.7003	0.87	-0.2009
Tb927.5.1480	hypothetical protein	ZUnknown	#N/A	#N/A	2174	551	-0.7039	5.19e-11	2.4715	1.50188e-06	2.1431	1.05e-08	0.4	0.8979	1	0	0	1	2.0388	0.5305	0.789	-0.5181	0.68	-0.5564
Tb927.8.1770	hypothetical protein, conserved	Mito.pathway	Tb927.08.1770	-	4101	2479	-0.6761	1.37e-36	0.6709	0.0457217	0.6918	0.0665	1.45	0.8979	1	0	0	1	-0.1504	0.6452	0.298	-0.8627	0.43	-1.2176
Tb927.10.460	NRKC NIMA-related protein kinase	Protein.kinase	Tb927.10.00460	+	3842	2027	-0.056	0.41	0.6617	0.0786129	0.6832	0.00502	1.47	0.8953	0	0	0	0	1.2556	0.3813	-0.147	0.7995	1.22	0.2869
Tb927.11.15740	hypothetical protein, conserved	ZUnknown	Tb927.11.15740	-	NA	1647	0.1132	0.0992	0.296	0.65337	0.2797	0.0581	1.52	0.8953	0	0	0	0	0.9341	0.3712	-0.007	1.1161	1.11	0.1506
Tb927.6.1980	LMBR1-like membrane protein, putative	ZUnknown	Tb927.06.1980	-	2784	2421	0.0545	0.404	0.0663	1	0.0484	0.999	0.99	0.8953	0	0	0	0	0.2264	0.1433	0.131	1.0897	1.1	0.1375
Tb927.10.8430	40S ribosomal protein S12	Ribosome	Tb927.10.08430	+	556	10983	-0.0423	0.456	-0.2956	0.52818	-0.3147	0.86	0.91	0.8953	0	0	0	0	-1.9166	0.0216	0.561	-1.2094	1.09	0.1243
Tb927.10.11420	hypothetical protein, conserved	ZUnknown	Tb927.10.11420	+	2769	2022	-0.0303	0.681	0.0878	1	0.1032	0.999	0.75	0.8953	0	0	0	0	0.0306	-0.3373	0.031	0.0884	1.08	0.111
Tb927.2.4540	Small nuclear ribonucleoprotein-associated protein B (TbSmB)	RNA.processing	Tb927.02.4540	-	568	633	-0.2662	0.00475	-0.3541	0.12564	-0.3546	0.132	0.5	0.8953	0	0	0	0	0.4876	-0.2549	-0.041	-0.5362	1.03	0.0426
Tb927.8.1300	hypothetical protein, conserved	ZUnknown	Tb927.08.1300	-	5987	1914	-0.0715	0.301	0.3069	1	0.3068	0.858	1.15	0.8953	0	0	0	0	1.939	0.3356	0.131	0.2518	0.94	-0.0893
Tb927.10.12840	mitochondrial carrier protein, MCP12, dicarboxylates & tricarboxylates	Mito.transport	Tb927.10.12840	-	2121	2171	0.2565	0.000291	-0.0935	1	-0.1145	0.999	1.06	0.8927	0	0	0	0	-3.1925	-0.0027	0.828	-2.8852	1.15	0.2016
Tb927.5.2300	formin, putative	ZUnknown	Tb927.05.2300	+	3431	2641	0.1202	0.0471	-0.0636	1	-0.0383	0.999	1.15	0.8927	0	0	0	0	0.8507	0.6938	0.439	-0.4242	1.04	0.0566
Tb927.11.8200	40S ribosomal protein S26	Ribosome	Tb927.11.08200	+	NA	9425	-0.0893	0.0782	-0.1524	0.740563	-0.1756	0.995	0.81	0.8927	0	0	0	0	-1.2285	-0.0925	0.522	-1.2408	1.03	0.0426
Tb927.6.3470	hypothetical protein, conserved	ZUnknown	Tb927.06.3470	-	1221	680	-0.5042	0.0149	-0.2339	1	-0.1813	0.999	0.95	0.8927	0	0	0	0	-0.0593	-0.5289	-0.439	-0.3275	0.98	-0.0291
Tb927.11.14770	hypothetical protein, conserved	ZUnknown	Tb927.11.14770	-	NA	855	0.2058	0.0268	0.3963	0.573158	0.1967	0.792	1.6	0.8901	0	0	0	0	0.3354	-0.1327	-0.182	0.7262	1.27	0.3448
Tb927.7.6210	hypothetical protein, conserved	ZUnknown	Tb927.07.6210	-	1774	525	-0.6445	1.58e-09	-0.3504	0.230126	-0.3596	0.235	1.82	0.8901	1	0	0	0	0.1723	-0.1864	0.288	-0.0755	1.15	0.2016
Tb927.11.3860	hypothetical protein, conserved	ZUnknown	Tb927.11.03860	+	NA	1917	0.1607	0.00823	-0.013	1	-0.0266	0.999	1.02	0.8901	0	0	0	0	-0.7986	0.1209	0.264	0.0768	1.07	0.0976
Tb927.11.12980	hypothetical protein, conserved	ZUnknown	Tb927.11.12980	-	NA	1733	-0.2859	2.58e-06	-0.1408	1	-0.0238	0.999	1.5	0.8901	0	0	0	0	1.2457	-0.2755	-0.666	0.0577	0.97	-0.0439
Tb927.11.780	hypothetical protein, conserved	ZUnknown	Tb927.11.00780	+	NA	5895	-0.6902	1.77e-59	3.1023	1.57293e-50	1.9894	4.72e-30	0.89	0.8875	1	0	0	1	0.3594	0.6133	0.32	-0.3936	0.7	-0.5146
Tb927.7.3600	emp24/gp25L/p24 family/GOLD, putative	Vesicular.transport	Tb927.07.3600	-	1497	586	0.1744	0.111	0.0595	1	0.065	0.999	1.31	0.8849	0	0	0	0	-0.3968	-0.189	0.263	0.5593	1.08	0.111
Tb927.11.8450	Amastin surface glycoprotein, putative	Membrane.protein	Tb927.11.08450	+	NA	901	0.3921	5e-06	0.2573	0.714733	-0.0051	0.999	1.72	0.8797	0	0	0	0	1.7102	0.3271	-0.036	-0.1065	1.68	0.7485
Tb927.6.4530	RBP17	RNA.binding	Tb927.06.4530	-	1682	604	0.2668	0.00621	0.3891	0.424675	0.3546	0.11	1.02	0.8797	0	0	0	0	-2.4108	0.3852	-0.15	-0.8041	0.97	-0.0439
Tb927.5.760	CSBPII_45	RNA.binding	Tb927.05.0760	+	5732	4579	-0.0502	0.42	1.3354	2.85692e-05	1.3042	0.00297	1.22	0.8797	0	0	0	1	1.296	0.7678	-0.02	0.2291	0.7	-0.5146
Tb927.3.2400	palmitoyl acyltransferase 10, putative	Lipids	Tb927.03.2400	+	1258	739	0.4843	5.62e-08	0.0629	1	0.0814	0.999	1.06	0.8771	0	0	0	0	0.0868	-0.1535	0.3	0.8589	1.03	0.0426
Tb927.7.5620	SET19	ZUnknown	Tb927.07.5620	+	1540	822	-0.3723	9.78e-06	-0.5544	0.126033	-0.5758	0.0154	1.26	0.8745	0	0	0	0	-0.2774	0.0412	1.09	-0.7034	0.83	-0.2688
Tb927.3.4260	Acyl-coenzyme A thioesterase, putative	Mito.pathway	Tb927.03.4260	-	2369	1728	0.1827	0.00338	0.0027	1	-0.0122	0.999	1.61	0.8718	0	0	0	0	-0.2466	0.518	0.024	-0.4709	1.01	0.0144
Tb927.6.5080	Protein of unknown function (DUF3808), putative	ZUnknown	Tb927.06.5080	+	2529	4186	0.1034	0.0778	0.0327	1	0.0478	0.999	1.64	0.8692	0	0	0	0	-0.1484	0.7579	0.1	0.1374	1.01	0.0144
Tb927.7.210	proline dehydrogenase	Mito.pathway	Tb927.07.0210	+	2100	1843	0.1659	0.0381	-0.1353	1	-0.1576	0.974	1.09	0.8692	0	0	0	0	-2.8795	0.5829	0.587	-2.0723	1.01	0.0144
Tb927.10.11460	hypothetical protein	ZUnknown	Tb927.10.11460	+	NA	419	-0.4318	7.41e-05	1.1842	0.00100199	1.5045	5.28e-10	0.98	0.8692	0	0	0	1	#N/A	#N/A	-0.217	0.3737	0.72	-0.4739
Tb927.10.8760	hypothetical protein, conserved	ZUnknown	Tb927.10.08760	+	1678	1115	0.0412	0.648	-0.1241	1	-0.1279	0.999	1.02	0.8666	0	0	0	0	0.264	-0.4105	0.17	0.2264	0.99	-0.0145
Tb927.8.920	ubiquitin-conjugating enzyme e2, putative (PEX4?)	Ubiquitin.proteasome	Tb927.08.0920	-	917	563	0.3576	0.0003	0.0095	1	0.0161	0.999	0.98	0.8666	0	0	0	0	0.0895	-0.2461	0.337	0.4991	0.95	-0.074
Tb927.10.13530	hypothetical protein	ZUnknown	Tb927.10.13530	+	345	1005	0.2333	0.00414	0.0019	1	0.0048	0.999	0.9	0.8639	0	0	0	0	-0.8221	-0.3622	0.834	-0.0196	1.38	0.4647
Tb927.4.3930	amino acid transporter, putative	Amino.acid.transport	Tb927.04.3930	-	2496	2589	-1.0892	7.2e-87	-0.5865	0.178619	-0.7958	7.21e-05	0.82	0.8639	1	0	0	0	-0.7353	0.3194	0.496	-1.2525	1.25	0.3219
Tb927.11.16370	SHQ1 protein, putative	ZUnknown	Tb927.11.16370	-	NA	1744	-0.0444	0.548	-0.1393	1	-0.1615	0.972	1.69	0.8639	0	0	0	0	0.7957	0.0737	0.455	-0.0081	1.07	0.0976
Tb927.10.11710	hypothetical protein	ZUnknown	Tb927.10.11710	+	1065	1285	-0.4624	4.45e-09	-0.4743	0.268742	-0.486	0.0936	1.35	0.8639	0	0	0	0	-0.1073	-0.8916	0.163	-0.7244	1.06	0.0841
Tb927.6.1220	hypothetical protein, conserved	Cytoskeleton	Tb927.06.1220	-	2543	1483	0.2027	0.00383	0.2576	1	0.2739	0.85	1.26	0.8639	0	0	0	0	0.6467	0.3662	0.202	0.3934	0.98	-0.0291
Tb927.11.16470	hypothetical protein, conserved, no domains, K-specific	ZUnknown	Tb927.11.16470	-	NA	2961	0.0218	0.741	0.3256	1	0.382	0.512	1.66	0.8639	0	0	0	0	1.3046	0.5698	0.109	0.4699	0.9	-0.152
Tb927.11.450	hypothetical protein, conserved	ZUnknown	Tb927.11.00450	-	NA	1990	-0.1059	0.154	-0.1249	1	-0.1529	0.999	1.25	0.8613	0	0	0	0	0.5906	0.7518	0.404	0.3697	1.01	0.0144
Tb927.8.7730	Sphingosine N-acyltransferase, putative	Lipids	Tb927.08.7730	+	2327	739	0.6236	7.12e-12	-0.519	0.0903825	-0.4471	0.0601	1.17	0.8613	0	1	0	0	-1.1635	0.1553	0.081	-2.2632	1.01	0.0144
Tb927.10.7700	ABC transporter, putative	Transporter	Tb927.10.07700	-	2127	2020	-0.0532	0.426	0.2812	1	0.2917	0.967	1.1	0.8586	0	0	0	0	-1.4877	0.9785	-0.018	-1.7787	1.11	0.1506
Tb927.11.1220	hypothetical protein, conserved	ZUnknown	Tb927.11.01220	+	NA	1654	0.0943	0.167	0.0859	1	0.0887	0.999	1.31	0.856	0	0	0	0	0.5412	0.4263	0.723	0.0116	1.03	0.0426
Tb927.1.3400	Bromodomain protein BDF6	ZUnknown	Tb927.01.3400	-	1275	893	-0.3827	1.23e-06	-0.622	0.00222527	-0.6117	0.00502	1.52	0.856	0	0	1	0	-0.2147	0.1001	0	0.3333	0.98	-0.0291
Tb927.10.12850	TRF ttaggg binding factor, telomere maintenance	DNA	Tb927.10.12850	-	2057	14211	0.1895	4e-06	-0.077	1	-0.0742	0.999	1.27	0.856	0	0	0	0	-0.5466	0.1182	1.103	0.2515	0.98	-0.0291
Tb927.6.2860	WD domain, G-beta repeat, putative	ZUnknown	Tb927.06.2860	+	2356	1831	0.2775	4.71e-06	0.147	0.863782	0.1336	0.954	1.59	0.8533	0	0	0	0	-0.3365	0.6151	0.492	0.2358	1.04	0.0566
Tb927.10.800	hypothetical protein, conserved	ZUnknown	Tb927.10.00800	+	2572	1304	0.2639	0.000428	0.1633	1	0.2165	0.653	1.64	0.8533	0	0	0	0	0.3221	0.5424	0.797	0.6645	1.03	0.0426
Tb927.11.1350	calcium uniporter protein, mitochondrial	Mito.pathway	Tb927.11.01350	+	NA	741	-0.9063	3.6e-27	-0.0336	1	-0.0632	0.999	1.04	0.8533	1	0	0	0	0.3133	-0.0819	-0.032	1.3689	1.02	0.0286
Tb927.10.6500	amino acid transporter, putative,amino acid permease, putative	Amino.acid.transport	Tb927.10.06500	+	2005	1052	-0.0618	0.47	0.2262	1	0.1722	0.999	1.64	0.8533	0	0	0	0	0.9178	0.068	0.017	0.6173	0.92	-0.1203
Tb927.10.15320	hypothetical protein, conserved	ZUnknown	Tb927.10.15320	+	1065	1340	0.0857	0.295	0.1649	1	0.1507	0.996	0.98	0.8507	0	0	0	0	0.0693	-0.7295	-0.57	0.4268	1.17	0.2265
Tb927.11.1750	hypothetical protein, conserved	ZUnknown	Tb927.11.01750	-	NA	1185	0.1066	0.179	0.0219	1	0.0225	0.999	1.2	0.8507	0	0	0	0	-0.201	-0.0018	0.114	0.4481	0.95	-0.074
Tb927.11.5720	hypothetical protein, conserved	ZUnknown	Tb927.11.05720	+	NA	1352	1.0023	2.99e-35	0.3338	1	0.3498	0.969	1.21	0.8507	0	1	0	0	-0.6639	0.6325	0.77	-0.1332	0.92	-0.1203
Tb927.5.4380	KPP1 kinetoplastid-specific phospho-protein phosphatase	Protein.phosphatase	Tb927.05.4380	-	5442	6907	0.6482	1.39e-33	0.7116	0.326114	0.6992	0.44	1.27	0.848	0	1	0	0	0.6476	0.151	-0.454	0.3038	1.32	0.4005
Tb927.7.1080	hypothetical protein, conserved	Mito.pathway	Tb927.07.1080	+	2125	1183	0.0018	0.986	-0.0893	1	-0.076	0.999	1.69	0.848	0	0	0	0	-0.3759	-0.0956	-0.02	-0.4066	1.29	0.3674
Tb927.11.10550	hypothetical protein, conserved	ZUnknown	Tb927.11.10550	+	NA	2064	0.183	0.00659	-0.209	0.972946	-0.1932	0.56	1.33	0.848	0	0	0	0	0.8874	-0.038	0.045	-0.082	1.04	0.0566
Tb927.10.3960	hypothetical protein, conserved	ZUnknown	Tb927.10.03960	-	1586	1119	-0.1368	0.58	0.0436	1	-0.1209	0.999	1.49	0.8453	0	0	0	0	0.6743	-0.2996	-0.6	0.3511	1.4	0.4854
Tb927.7.4090	serine/threonine-protein kinase, putative	Protein.kinase	Tb927.07.4090	+	4469	2326	0.2385	2.53e-05	0.4532	0.697535	0.4148	0.437	1.13	0.8453	0	0	0	0	1.0808	0.6086	-0.208	0.1998	1.26	0.3334
Tb927.11.4270	hypothetical protein, conserved	ZUnknown	Tb927.11.04270	-	NA	671	0.0407	0.703	0.1024	1	0.1004	0.999	1.65	0.8453	0	0	0	0	-0.8393	-0.096	0.13	0.0636	1.19	0.251
Tb927.2.2500	hypothetical protein, conserved	ZUnknown	Tb927.02.2500	-	1232	586	-0.015	0.916	0.0476	1	0.021	0.999	1.11	0.8453	0	0	0	0	-1.0499	-0.1178	0.673	-0.6218	1.11	0.1506
Tb927.10.15210	CBP30 nuclear cap binding complex subunit	Nuclear.transport	Tb927.10.15210	+	1015	762	0.1554	0.103	-0.2605	0.527803	-0.2416	0.146	1.55	0.8453	0	0	0	0	-0.2733	-0.2159	0.413	-0.087	1.01	0.0144
Tb927.11.6650	hypothetical protein	ZUnknown	Tb927.11.06650	-	NA	67	-0.4374	0.111	-0.0386	1	0.3694	0.323	0.92	0.8453	0	0	0	0	0.9171	-0.0532	1.023	0.7216	0.58	-0.7859
Tb927.11.2690	succinyl-coA:3-ketoacid-coenzyme A transferase, mitochondrial precursor, putative	Mito.citric.acid.cycle	Tb927.11.02690	-	NA	4260	0.3187	1.21e-11	1.3984	7.83267e-06	1.3096	5.78e-07	0.61	0.8426	0	0	0	1	-1.7162	2.2127	0.862	-0.3142	1.02	0.0286
Tb927.10.4280	Complex III cytochrome b/c complex, Cytochrome bd ubiquinol oxidase, 14kDa subunit	Mito.e.transport	Tb927.10.04280	+	1024	415	0.6666	3.18e-10	-0.3872	0.183233	-0.4025	0.208	1.49	0.8426	0	1	0	0	-4.4644	-0.2499	1.316	-3.0904	0.96	-0.0589
Tb927.11.310	hypothetical protein, conserved	ZUnknown	Tb927.11.00310	-	NA	1558	0.2648	0.000221	0.3868	0.280974	0.3287	0.297	1.17	0.84	0	0	0	0	0.5081	0.0962	-0.047	0.4513	1.3	0.3785
Tb927.5.1780	hypothetical protein, conserved	ZUnknown	Tb927.05.1780	+	2463	2923	-0.4196	7.02e-11	-0.4483	0.81094	-0.4845	0.674	1.2	0.84	0	0	0	0	-0.4017	-0.3079	0.125	0.0013	1.23	0.2987
Tb927.9.7740	lipid-like atypical dual specificity phosphatase, putative	Lipids	Tb927.09.07740	-	NA	775	-0.5441	7.13e-11	-0.4131	0.500039	-0.3466	0.154	1.5	0.84	0	0	0	0	0.3262	0.2236	-0.21	0.3832	1.08	0.111
Tb927.11.16390	(CKS1 cyclin dependent kinases regulatory subunit, putative	Cell.cycle	Tb927.11.16390	-	NA	620	0.6109	6.93e-10	0.3372	0.924654	0.2039	0.749	0.93	0.8373	0	1	0	0	0.1761	0.1542	-0.275	0.1884	1.31	0.3896
Tb927.7.1760	hypothetical protein, conserved	ZUnknown	Tb927.07.1760	+	2326	1372	0.1166	0.174	-0.0493	1	0.0535	0.999	0.88	0.8346	0	0	0	0	0.3221	-0.9277	-0.126	0.1183	1.15	0.2016
Tb927.11.10380	hypothetical protein, conserved	ZUnknown	Tb927.11.10380	+	NA	1684	0.0439	0.547	0.0991	1	0.1033	0.958	1.5	0.8346	0	0	0	0	0.5253	-0.1384	-0.567	-0.0692	1.03	0.0426
Tb927.5.2730	hypothetical protein, conserved	ZUnknown	Tb927.05.2730	+	2205	453	0.0764	0.59	0.4064	0.923892	0.1264	0.999	1.37	0.8319	0	0	0	0	1.5224	-0.0287	0.754	0.7183	1.2	0.263
Tb927.11.9180	ADP-ribosylation factor GTPase activating protein, centaurin beta 5 (Cnt-b5)	Vesicular.transport	Tb927.11.09180	+	NA	1489	-0.2006	0.00348	0.0926	1	0.1012	0.999	1.24	0.8319	0	0	0	0	-0.0477	0.3662	-0.065	0.1153	1.03	0.0426
Tb927.7.1240	Sphingosine kinase	Lipids	Tb927.07.1240	+	3481	2716	0.1724	0.00319	0.57	0.820585	0.5109	0.327	1.32	0.8292	0	0	0	0	1.2535	0.5618	0.177	0.4426	1.25	0.3219
Tb927.9.13140	hypothetical protein, conserved	ZUnknown	Tb927.09.13140	+	NA	1461	0.0065	0.943	0.0809	1	0.086	0.903	1.3	0.8292	0	0	0	0	-0.2331	-0.2795	-0.131	-0.0261	1.13	0.1763
Tb927.4.2210	hypothetical protein, conserved	ZUnknown	Tb927.04.2210	+	2694	1223	-0.0238	0.806	0.1745	1	0.1454	0.963	1.19	0.8292	0	0	0	0	0.6349	0.6897	-0.094	1.0372	1.09	0.1243
Tb927.9.11690	hypothetical protein, conserved	ZUnknown	Tb927.09.11690	+	NA	1122	-0.0034	0.972	-0.0538	1	-0.0769	0.999	1.06	0.8292	0	0	0	0	0.3862	0.2722	0.29	0.0488	1.06	0.0841
Tb927.10.830	adenylate kinase, putative (ADKB)	Nucleotides	Tb927.10.00830	+	1930	2038	-0.399	1.02e-09	0.0427	1	0.0077	0.999	1.66	0.8265	0	0	0	0	0.5329	-1.032	-1.898	-0.2293	0.99	-0.0145
Tb927.9.13610	DEAD-box helicase	RNA.helicase	Tb927.09.13610	-	NA	7097	-0.4048	1.88e-22	0.4295	1	0.4649	0.785	0.77	0.8237	0	0	0	0	1.492	0.7288	0.044	0.8693	1.03	0.0426
Tb927.9.8320	hypothetical protein	ZUnknown	Tb927.09.08320	-	NA	873	0.4085	0.0631	0.6961	0.496507	0.9408	0.185	1.08	0.8237	0	0	0	0	1.8858	0.1129	0.419	1.7217	0.78	-0.3585
Tb927.3.3740	Zinc-finger double-stranded RNA-binding, putative	ZUnknown	Tb927.03.3740	+	3459	1278	-0.2458	0.000845	-0.0965	1	0.0086	0.999	1.21	0.821	0	0	0	0	-0.1081	0.1064	0.596	-0.3784	1	0
Tb927.1.1400	Overproducer of inositol protein 10 homolog, putative	ZUnknown	Tb927.01.1400	+	769	408	-0.0144	0.929	0.2366	0.990479	0.2706	0.808	1.27	0.8183	0	0	0	0	0.2735	-0.0305	0.287	0.1213	1.22	0.2869
Tb927.11.15210	ESP16 Enriched in surface-labeled proteome	Membrane.protein	Tb927.11.15210	-	NA	2449	0.2344	3.52e-05	0.0172	1	0.0205	0.999	1.41	0.8156	0	0	0	0	0.4081	-0.0955	-0.181	0.4273	1.14	0.189
Tb927.7.4860	KKT13 Kinetochore protein	Cell.cycle	Tb927.07.4860	-	1578	762	-0.1347	0.166	0.1067	1	0.0914	0.999	1.44	0.8156	0	0	0	0	-0.2711	-0.0479	-0.817	-0.572	1.07	0.0976
Tb927.8.1520	NUDIX hydrolase	Enzyme	Tb927.08.1520	+	1468	991	0.1958	0.0146	-0.0474	1	-0.0618	0.999	1.23	0.8156	0	0	0	0	-0.977	0.0457	0.175	-0.6025	1.05	0.0704
Tb927.10.12810	cholinephosphate cytidylyltransferase A, putative	Lipids	Tb927.10.12810	-	1621	3508	0.2866	1.68e-07	0.1056	1	0.1144	0.959	0.9	0.8156	0	0	0	0	0.2193	-0.293	-0.296	-0.2419	0.93	-0.1047
Tb927.10.11370	hypothetical protein, conserved	ZUnknown	Tb927.10.11370	+	792	575	0.1715	0.138	-0.2329	0.839326	-0.2331	0.953	1.02	0.8128	0	0	0	0	-1.3262	-0.0708	0.43	-0.3417	1.17	0.2265
Tb927.11.14740	YqaJ-like viral recombinase domain containing protein, putative	ZUnknown	Tb927.11.14740	-	NA	1869	-0.2027	0.002	0.221	0.833539	0.2156	0.875	1.44	0.8128	0	0	0	0	0.2875	0.4712	0.257	0.5243	1.05	0.0704
Tb927.11.3140	DYRK2 dual-specificity protein kinase	Protein.kinase	Tb927.11.03140	-	NA	2121	0.2976	3.63e-07	0.003	1	0.0164	0.999	1.42	0.8128	0	0	0	0	0.2331	0.4859	0.264	0.4436	1.03	0.0426
Tb927.10.3550	DNA repair helicase, putative	DNA	Tb927.10.03550	+	4049	2560	-0.0826	0.214	-0.1178	1	-0.1024	0.982	0.9	0.8101	0	0	0	0	0.769	0.2957	0.544	0.0663	1.4	0.4854
Tb927.9.9220	hypothetical protein, conserved	ZUnknown	Tb927.09.09220	-	NA	1488	-0.8041	4.59e-37	-1.0842	0.00985951	-1.0907	0.00864	1.25	0.8101	1	0	1	0	-0.2691	0.0483	0.706	0.1791	1.13	0.1763
Tb927.7.320	RBP8	RNA.binding	Tb927.07.0320	-	1329	467	0.3847	0.000435	-0.0605	1	-0.0937	0.999	1.21	0.8101	0	0	0	0	-1.1851	0.3724	-0.081	-0.5995	1.03	0.0426
Tb927.10.790	vesicle-associated membrane protein, putative (VAMP)	Vesicular.transport	Tb927.10.00790	+	1753	1365	0.1328	0.117	0.2704	1	0.2482	0.999	1.01	0.8101	0	0	0	0	0.4951	-0.0386	-0.338	1.0864	1	0
Tb927.8.3070	hypothetical protein, conserved	ZUnknown	Tb927.08.3070	+	620	270	0.0753	0.639	0.0245	1	0.0082	0.999	0.76	0.8101	0	0	0	0	-1.2037	-0.341	-0.222	-0.1831	0.98	-0.0291
Tb927.1.1150	zeta tubulin	Cytoskeleton	Tb927.01.1150	+	1602	999	0.2016	0.0319	0.0316	1	0.0443	0.999	0.91	0.8101	0	0	0	0	-0.5851	-0.0571	0.118	0.1556	0.97	-0.0439
Tb927.10.5250	ZC3H32	RNA.binding	Tb927.10.05250	+	6393	5076	-0.0885	0.163	3.1034	9.30502e-18	2.9333	4.08e-15	0.72	0.8101	0	0	0	1	1.2987	1.0501	0.052	2.4569	0.97	-0.0439
Tb927.9.8240	hypothetical protein, conserved, no good matches	ZUnknown	Tb927.09.08240	-	NA	1103	0.161	0.0539	0.7552	0.00512729	0.6818	0.0661	1.58	0.8074	0	0	0	1	0.1998	-0.0707	-0.709	0.4703	1.28	0.3561
Tb927.10.7270	hypothetical protein, conserved	ZUnknown	Tb927.10.07270	-	1793	1319	0.1007	0.207	0.1647	0.97518	0.1421	0.98	1.34	0.8074	0	0	0	0	0.5503	0.2867	0.666	-0.1138	1.15	0.2016
Tb927.11.2190	MIC10-2	Mito.biogenesis	Tb927.11.02190	+	NA	369	0.0947	0.49	-0.0794	1	-0.0849	0.999	1	0.8074	0	0	0	0	0.0908	-0.3873	0.008	-0.3875	0.96	-0.0589
Tb927.8.870	serine/threonine kinase, putative,protein kinase, putative	Protein.kinase	Tb927.08.0870	-	5945	2243	0.2404	9.04e-05	2.3763	5.97164e-10	1.9034	6.35e-07	1.16	0.8046	0	0	0	1	0.8298	0.2528	-0.198	0.3667	1.99	0.9928
Tb927.8.7770	aldehyde dehydrogenase family, putative	ZUnknown	Tb927.08.7770	+	3664	883	0.0383	0.703	-0.1982	1	-0.1821	0.933	0.71	0.8046	0	0	0	0	-0.1599	-0.053	0.795	-0.7453	1.27	0.3448
Tb927.4.1540	POMP27, NAD-dependent epimerase, aldehyde reductase, one putative TM domain	Mito.membrane	Tb927.04.1540	-	4437	2907	-0.0593	0.316	0.3741	0.444534	0.31	0.693	1.34	0.8046	0	0	0	0	0.5694	0.749	0.349	-0.1864	1.18	0.2388
Tb927.3.3440	phytanoyl-CoA dioxygenase (PhyH), putative	ZUnknown	Tb927.03.3440	+	1499	949	0.2999	0.00415	0.0159	1	0.0185	0.999	1.24	0.8018	0	0	0	0	0.4766	0.1031	0.42	-0.476	1.06	0.0841
Tb927.7.4970	glutamine synthetase, putative	Amino.acids	Tb927.07.4970	+	1528	953	0.777	7.06e-24	-0.2569	0.830009	-0.2532	0.558	1.49	0.7991	0	1	0	0	-3.6982	0.3933	1.634	-2.6389	1.33	0.4114
Tb927.8.1010	chaperone DNAj, putative, J30	Chaperone	Tb927.08.1010	-	1871	1030	0.1102	0.25	0.0191	1	0.002	0.999	1.26	0.7991	0	0	0	0	-0.8612	0.029	0.302	0.2745	1.2	0.263
Tb927.8.6420	beta-ketoacyl-ACP reductase 2	Enzyme	Tb927.08.6420	+	2137	1160	-0.1614	0.0403	-0.2836	0.706404	-0.2783	0.436	1.06	0.7991	0	0	0	0	-0.3759	0.1891	0.6	-0.3796	1.15	0.2016
Tb927.11.16530	hypothetical protein, conserved	Mito.pathway	Tb927.11.16530	-	NA	2369	-0.147	0.0144	-0.1498	1	-0.1529	0.999	0.94	0.7991	0	0	0	0	-0.3925	-0.0166	0.586	-0.2803	1	0
Tb927.6.3430	NEK10 protein kinase	Protein.kinase	Tb927.06.3430	-	3829	1399	-0.507	1.68e-13	-0.1765	1	-0.2529	0.757	0.96	0.7963	0	0	0	0	0.4033	0.1849	0.009	-0.0036	1.09	0.1243
Tb927.11.6450	Serine incorporator (Serinc), putative	ZUnknown	Tb927.11.06450	-	NA	1960	0.1487	0.0221	0.0043	1	0.0039	0.999	1.04	0.7935	0	0	0	0	-0.3544	0.0704	0.096	1.1532	1.36	0.4436
Tb927.3.1690	Mitochondrial ATP synthase subunit, putative	Mito.pathway	Tb927.03.1690	-	745	1221	0.3718	4.81e-07	-0.1251	1	-0.1467	0.999	0.88	0.788	0	0	0	0	-2.0424	-0.3352	-0.244	-1.8157	1.01	0.0144
Tb927.2.3390	hypothetical protein, conserved	ZUnknown	Tb927.02.3390	-	3627	1862	-0.2938	1.76e-06	-0.1281	1	-0.0229	0.999	0.79	0.788	0	0	0	0	-0.0222	0.2695	0.306	0.892	0.86	-0.2176
Tb927.9.15850	hypothetical protein	ZUnknown	#N/A	#N/A	NA	1315	-0.7362	0.00272	0.1705	1	0.0576	0.999	1.29	0.7852	1	0	0	0	3.1718	0.4981	0.485	2.1732	1.28	0.3561
Tb927.6.4190	hypothetical protein, conserved	ZUnknown	Tb927.06.4190	-	1656	889	-0.2467	0.00375	-0.5986	0.0715527	-0.5909	0.0216	1.11	0.7852	0	0	0	0	-2.203	0.1384	0.517	-0.229	1.09	0.1243
Tb927.11.11770	eIF4E3	Translation	Tb927.11.11770	+	NA	2438	-0.6294	2.48e-31	-0.507	0.954904	-0.5203	0.631	1.26	0.7852	1	0	0	0	0.1379	0.7377	0.375	-0.3109	1	0
Tb927.7.2540	ubiquitin-conjugating enzyme e2, putative	Ubiquitin.proteasome	Tb927.07.2540	-	1200	1144	-0.1398	0.0973	-0.2456	1	-0.2568	0.746	1.42	0.7852	0	0	0	0	0.0726	0.2937	-0.434	-0.0546	0.96	-0.0589
Tb927.5.3560	vesicle-associated membrane protein, putative (VAMP)	Vesicular.transport	Tb927.05.3560	+	2035	1485	0.0327	0.694	0.5453	0.362115	0.4535	0.46	1.25	0.7824	0	0	0	0	0.1749	0.2998	-0.273	0.6557	1.24	0.3103
Tb927.6.3530	hypothetical protein, conserved, MItochondrial carrier superfamiiy domain	ZUnknown	Tb927.06.3530	-	1653	632	-0.1774	0.0788	-0.514	0.264956	-0.525	0.0039	1.49	0.7824	0	0	0	0	-1.2024	0.033	0.323	-0.1297	1.12	0.1635
Tb927.10.4720	Ankyrin repeats (many copies), putative	ZUnknown	Tb927.10.04720	-	2049	868	0.0699	0.456	-0.0952	1	-0.0798	0.999	1.3	0.7824	0	0	0	0	0.3097	0.102	0.283	0.2197	1.08	0.111
Tb927.2.3370	UDP-Gal glycosyltransferase GT3	Glycans	Tb927.02.3370	-	2327	1145	-0.0041	0.972	0.2682	0.781542	0.2451	0.811	1.52	0.7824	0	0	0	0	-0.5981	0.2198	0.353	-0.9342	1.02	0.0286
Tb927.3.5270	DNA-directed RNA polymerases II subunit, putative (RPB4)	RNA.synthesis	Tb927.03.5270	+	955	658	-0.1716	0.101	-0.1864	0.734692	-0.1729	0.878	1.4	0.7824	0	0	0	0	-0.9743	-0.3893	0.398	-0.3834	0.96	-0.0589
Tb927.1.1530	protein kinase, putative	Protein.kinase	Tb927.01.1530	+	9634	5878	-0.286	1.66e-08	0.7192	0.369703	0.5268	0.574	1.13	0.7796	0	0	0	0	1.0862	0.8409	0.663	0.0883	1.18	0.2388
Tb927.5.4530	Elongase 4	Lipids	Tb927.05.4530	-	894	1737	-0.5188	5.46e-11	-0.421	0.438214	-0.412	0.465	0.75	0.7796	0	0	0	0	0.0417	-0.8114	-0.074	-0.7871	1.07	0.0976
Tb927.2.4580	UNC119 (unc119)	Cytoskeleton	Tb927.02.4580	-	2820	2210	-1.007	1.49e-56	-0.6066	0.412591	-0.4994	0.403	0.73	0.7768	1	0	0	0	0.9048	-0.0386	-0.704	0.1346	1.05	0.0704
Tb927.3.4500	fumarate hydratase, class I (FHc)	Glucose.glycerol	Tb927.03.4500	-	3502	1318	-0.0314	0.709	-0.2962	1	-0.3252	0.989	1.45	0.7768	0	0	0	0	-2.2077	0.0383	0.29	-2.4973	1.02	0.0286
Tb927.5.2860	Protein of unknown function (DUF2453), putative	ZUnknown	Tb927.05.2860	-	2228	1236	-0.3191	4.32e-06	-0.1969	0.972704	-0.2057	0.905	1.43	0.774	0	0	0	0	0.3354	0.2391	0.397	0.7858	1.04	0.0566
Tb927.3.2610	GPI inositol deacylase 2 (GPIdeAc2)	GPI.anchors	Tb927.03.2610	-	2953	2713	-0.0364	0.562	0.0569	1	0.0187	0.999	1.06	0.7712	0	0	0	0	2.7651	0.2109	0.145	3.3957	1.14	0.189
Tb927.6.1610	ribosomal RNA adenine dimethylase family protein, =yeast Dim1	rRNA.tRNA.process	Tb927.06.1610	-	1592	1008	-0.2362	0.0108	-0.1725	1	-0.1809	0.983	1.48	0.7712	0	0	0	0	-0.7218	0.0409	1.318	-0.0011	1.07	0.0976
Tb927.7.5540	2,4-dienoyl-coa reductase-like protein	Lipids	Tb927.07.5540	+	2302	1277	-0.2459	0.000724	0.0959	1	0.084	0.999	0.87	0.7712	0	0	0	0	-0.2112	-0.1029	0.34	-0.043	0.98	-0.0291
Tb927.6.2680	transmembrane protein, putative	ZUnknown	Tb927.06.2680	+	626	388	0.0866	0.512	-0.1995	0.853998	-0.1933	0.827	1.3	0.7684	0	0	0	0	-0.9253	-0.5776	-0.181	-0.2051	1.17	0.2265
Tb927.10.9290	AAA domain containing protein, putative	ZUnknown	Tb927.10.09290	+	1512	1386	0.3097	2.46e-06	0.1477	1	0.1482	0.908	1.28	0.7684	0	0	0	0	-0.0919	-0.008	0.203	0.3348	1.1	0.1375
Tb927.9.9520	ZC3H29	RNA.binding	Tb927.09.09520	-	NA	3708	0.06	0.344	2.157	2.53039e-09	1.2201	0.00571	0.85	0.7684	0	0	0	1	0.4859	0.8424	0.404	0.7254	1.07	0.0976
Tb927.3.3100	peptidyl-prolyl cis-trans isomerase NIMA-interacting 4, putative	Chaperone	Tb927.03.3100	-	990	512	-1.4096	2.01e-33	-1.1702	4.67868e-11	-1.2515	7.55e-17	0.72	0.7684	1	0	1	0	-0.6467	-0.6098	-0.276	-0.1153	1.05	0.0704
Tb927.9.1500	NEK15 protein kinase	Protein.kinase	Tb927.09.01500	-	NA	3579	0.3066	1.29e-09	0.292	0.732567	0.2711	0.513	1.23	0.7684	0	0	0	0	0.6394	0.1001	-0.057	0.9693	1.02	0.0286
Tb927.3.5650	protein kinase, putative,serine/threonine protein kinase, putative	Protein.kinase	Tb927.03.5650	+	4383	1713	0.3307	2.93e-06	0.0285	1	0.095	0.999	0.92	0.7655	0	0	0	0	-0.1211	0.4058	0.1	0.0652	1.05	0.0704
Tb927.11.7790	Mitochondrial ribosomal protein S16	Mito.translation	Tb927.11.07790	-	NA	1332	0.0915	0.264	0.146	1	0.1381	0.999	1.18	0.7655	0	0	0	0	-0.991	0.1506	0.641	-0.2918	1.04	0.0566
Tb927.11.13590	hypothetical protein, conserved	ZUnknown	Tb927.11.13590	-	NA	356	0.0299	0.839	-0.051	1	-0.1549	0.718	1.5	0.7655	0	0	0	0	-0.2825	0.1908	0.793	-0.3449	0.96	-0.0589
Tb927.11.13420	PPPDE putative peptidase domain containing protein, putative	ZUnknown	Tb927.11.13420	-	NA	891	0.146	0.0797	0.4437	0.0947172	0.2724	0.28	1.52	0.7627	0	0	0	0	0.3461	-0.0065	0.1	0.7952	2.02	1.0144
Tb927.2.4590	branched-chain amino acid aminotransferase, putative	Amino.acids	Tb927.02.4590	-	2926	10143	-0.2229	4.76e-07	0.165	1	0.1994	0.941	1.21	0.7627	0	0	0	0	0.5201	-1.0159	-0.508	0.1657	1.37	0.4542
Tb927.11.4950	hypothetical protein, conserved	ZUnknown	Tb927.11.04950	+	NA	3202	0.2784	2.23e-08	1.2925	0.0972529	1.1969	0.0184	0.82	0.7599	0	0	0	0	-0.1335	0.7665	0.006	0.2215	1.37	0.4542
Tb927.11.7870	hypothetical protein, conserved	ZUnknown	Tb927.11.07870	-	NA	1545	0.0358	0.643	-0.1789	1	-0.175	0.824	1.51	0.7599	0	0	0	0	0.9725	0.0965	0.718	-0.0256	1.23	0.2987
Tb927.11.8810	hypothetical protein, conserved	ZUnknown	Tb927.11.08810	+	NA	1094	-0.7465	4.07e-25	-0.2747	0.870225	-0.2788	0.461	1.13	0.7599	1	0	0	0	-0.3108	-0.1596	-0.001	0.2626	1.1	0.1375
Tb927.7.5250	hypothetical protein, conserved	ZUnknown	Tb927.07.5250	+	2268	1903	0.0041	0.959	-0.1207	1	-0.1536	0.773	1.53	0.7599	0	0	0	0	0.8786	0.3312	0.236	0.214	1.05	0.0704
Tb927.8.7190	hypothetical protein	ZUnknown	Tb927.08.7190	+	2187	548	0.313	0.00126	-0.2092	1	-0.1774	0.775	1.38	0.7599	0	0	0	0	0.1124	0.1063	0.426	-0.2241	1.01	0.0144
Tb927.4.1400	vacuolar transport protein 4A, putative	Lysosome	Tb927.04.1400	-	1479	751	0.1454	0.138	0.2683	1	0.2684	0.924	1.35	0.7599	0	0	0	0	-0.2998	0.6739	1.21	0.9541	1	0
Tb927.3.3010	hypothetical protein, conserved	ZUnknown	Tb927.03.3010	-	595	311	0.0429	0.795	-0.0231	1	0.0177	0.999	1.28	0.7599	0	0	0	0	-0.7513	-0.2435	0.09	0.1005	0.88	-0.1844
Tb927.8.7780	hypothetical protein, conserved	ZUnknown	Tb927.08.7780	+	NA	2329	-1.5314	5.54e-113	0.1081	1	0.1581	0.999	1.07	0.757	1	0	0	0	#N/A	#N/A	-0.465	1.3007	1.32	0.4005
Tb927.7.5730	hypothetical protein, conserved	ZUnknown	Tb927.07.5730	+	2868	1595	-0.1783	0.0128	0.0655	1	0.0731	0.999	1.59	0.757	0	0	0	0	1.1427	0.3982	0.077	0.0521	1.05	0.0704
Tb927.10.3110	DNA primase large subunit	DNA	Tb927.10.03110	+	1784	1110	0.0065	0.946	-0.0633	1	-0.0622	0.999	1.36	0.757	0	0	0	0	0.3932	0.2256	0.002	0.1419	1.05	0.0704
Tb927.10.2820	hypothetical protein, conserved	ZUnknown	Tb927.10.02820	+	1532	683	0.2663	0.00661	0.1453	1	0.1368	0.999	0.78	0.757	0	0	0	0	-0.1409	-0.0919	0.281	0.7068	1.04	0.0566
Tb927.3.5560	hypothetical protein, conserved	ZUnknown	Tb927.03.5560	+	532	439	0.316	0.00481	0.4219	0.685828	0.3802	0.824	0.66	0.757	0	0	0	0	-0.9942	-0.0181	0.469	-0.5153	1.04	0.0566
Tb927.9.12280	hypothetical protein, conserved	ZUnknown	Tb927.09.12280	+	NA	412	0.0853	0.526	0	1	-0.1121	0.999	1.1	0.757	0	0	0	0	-0.3079	-0.2105	0.219	0.0575	1.01	0.0144
Tb927.9.10920	KKT3, PK6 protein kinase,	Cell.cycle	Tb927.09.10920	-	NA	3314	0.071	0.229	0.0886	1	0.0993	0.999	0.92	0.757	0	0	0	0	-0.0373	0.3714	0.19	0.0769	0.99	-0.0145
Tb927.4.2240	hypothetical protein, conserved, D-aminoacid aminotransferase domain, used for synthesis of D-glutamic acid and D-alanine	Enzyme	Tb927.04.2240	+	1798	1956	0.3768	1.02e-10	-0.2053	0.886847	-0.2233	0.738	1.43	0.7542	0	0	0	0	-1.0838	-0.0972	0.486	-0.9649	1.08	0.111
Tb927.4.1810	mitochondrial ribosomal protein L33	Mito.translation	Tb927.04.1810	-	1307	564	0.0742	0.529	-0.0865	1	-0.064	0.999	1.13	0.7542	0	0	0	0	-0.5349	-0.1928	0.133	-0.2094	0.94	-0.0893
Tb927.10.8890	kinetoplast DNA-associated protein, putative	Mito.DNA	Tb927.10.08890	+	4340	1191	0.5721	7.82e-15	0.5969	0.487768	0.459	0.777	1.46	0.7513	0	0	0	0	0.9051	-0.0192	-0.38	-0.7036	1.67	0.7398
Tb927.2.2200	hypothetical protein, conserved	ZUnknown	Tb927.02.2200	-	1242	465	-0.2066	0.0712	-0.0895	1	-0.0941	0.999	0.89	0.7513	0	0	0	0	0.2086	-0.3106	-0.115	-0.7271	0.97	-0.0439
Tb927.1.890	hypothetical protein, conserved	ZUnknown	Tb927.01.0890	-	927	1120	0.4879	7.16e-10	0.0942	1	0.1328	0.999	1.1	0.7513	0	0	0	0	0.6105	-0.142	0.337	0.8894	0.94	-0.0893
Tb927.8.6090	ubiquitin-conjugating enzyme e2, putative	Ubiquitin.proteasome	Tb927.08.6090	+	3275	834	-0.2176	0.0197	0.947	0.00904571	0.8569	0.0152	1.25	0.7513	0	0	0	1	0.9679	0.2832	0.325	-0.2884	0.65	-0.6215
Tb927.4.370	hypothetical protein, conserved	ZUnknown	Tb927.04.0370	-	2575	552	-0.3099	0.00426	-0.3177	0.781542	-0.3668	0.417	1.33	0.7485	0	0	0	0	-0.003	-0.2253	0.149	-0.6228	1.29	0.3674
Tb927.1.3050	tRNA (Uracil-5-)-methyltransferase, putative	ZUnknown	Tb927.01.3050	+	1947	1987	-0.1115	0.0903	-0.1361	1	-0.1285	0.933	1.32	0.7485	0	0	0	0	-0.4554	0.3887	0.621	-0.1063	1.05	0.0704
Tb927.9.4810	hypothetical protein, conserved	ZUnknown	Tb927.09.04810	+	NA	680	0.5297	6.14e-09	0.0568	1	0.0339	0.999	1.3	0.7485	0	0	0	0	-0.4499	-0.1504	0.23	-0.0652	1.04	0.0566
Tb927.3.2720	hypothetical protein	ZUnknown	Tb927.03.2720	-	1760	1053	-0.4255	2.44e-08	-0.0532	1	-0.0451	0.999	1.38	0.7485	0	0	0	0	0.929	-0.2742	-0.423	-0.4716	1	0
Tb927.1.1240	CTP synthase	Nucleotides	Tb927.01.1240	+	1828	3802	-0.3707	5.29e-11	0.2312	1	0.275	0.827	1.04	0.7485	0	0	0	0	-0.1385	0.2714	0.592	-0.9595	0.82	-0.2863
Tb927.1.1500	conserved protein, unknown function	ZUnknown	Tb927.01.1500	+	2584	4270	-0.4927	2.4e-22	3.0938	4.8431e-12	3.4105	3.37e-17	0.54	0.7456	0	0	0	1	2.0985	0.504	-0.046	1.9331	1.26	0.3334
Tb927.10.390	DUF2407 ubiquitin-like domain containing protein, putative	ZUnknown	Tb927.10.00390	+	2112	2035	-0.1073	0.201	0.3408	0.841841	0.2531	0.999	0.78	0.7456	0	0	0	0	0.9456	-0.4403	-0.886	0.8609	1.18	0.2388
Tb927.10.12100	RBP7B	RNA.binding	Tb927.10.12100	+	905	1381	-0.1555	0.0579	0.0693	1	0.0766	0.999	1.06	0.7456	0	0	0	0	2.0809	-0.5344	-0.847	2.3757	1.02	0.0286
Tb927.9.10640	synaptojanin (N-terminal domain), putative	Vesicular.transport	Tb927.09.10640	-	NA	2124	-0.0665	0.308	0.4073	0.748113	0.3642	0.63	1	0.7427	0	0	0	0	0.4533	0.326	0.004	0.6521	1.4	0.4854
Tb927.5.1710	ribonucleoprotein p18, mitochondrial precursor, putative	Mito.RNA	Tb927.05.1710	+	1184	2032	-0.0509	0.597	-0.5486	0.218896	-0.5537	0.357	0.95	0.7398	0	0	0	0	-1.4802	0.1504	0.297	-2.107	1.02	0.0286
Tb927.3.2740	hypothetical protein, conserved	ZUnknown	Tb927.03.2740	-	1198	1374	-0.4147	1.29e-09	-0.2376	1	-0.2268	0.879	0.76	0.7398	0	0	0	0	-0.3472	-0.3738	0.303	-0.0557	1.01	0.0144
Tb927.11.5850	RBP38	RNA.binding	Tb927.11.05850	+	NA	4689	-0.3164	2.15e-12	-0.4465	0.377621	-0.4606	0.0011	1.1	0.737	0	0	0	0	-0.4223	-0.4309	-0.294	-0.441	1	0
Tb927.10.12040	protein kinase, putative,mitogen-activated protein kinase 11, putative	Protein.kinase	Tb927.10.12040	+	1805	2500	-0.1669	0.0189	0.8224	0.090422	0.8614	0.137	1.13	0.7341	0	0	0	0	1.2054	0.7261	-0.08	0.6973	0.93	-0.1047
Tb927.1.2160	calpain-like protein fragment, putative	Protease	Tb927.01.2160	+	602	419	0.4609	0.000291	-0.4316	1	-0.5045	0.858	0.88	0.7283	0	0	0	0	0.7629	0.3244	-1.423	1.0995	2.11	1.0772
Tb927.5.1730	inhibitor of serine peptidase (ISP), putative,ecotin family (I11), putative	Protease	Tb927.05.1730	+	639	1854	-0.0238	0.823	0.0878	1	0.0883	0.999	0.97	0.7283	0	0	0	0	1.1465	-0.2565	-1.271	0.5835	1.22	0.2869
Tb927.6.1790	hypothetical protein	ZUnknown	Tb927.06.1790	-	677	1040	-1.2868	4.74e-05	0.4238	0.990462	0.098	0.999	1.04	0.7283	1	0	0	0	0.5358	0.2481	-0.616	1.2627	0.91	-0.1361
Tb927.11.12960	hypothetical protein, conserved	ZUnknown	Tb927.11.12960	-	NA	420	0.1202	0.37	-0.2203	0.813826	-0.1969	0.93	0.54	0.7254	0	0	0	0	-0.9126	-0.042	0.376	-0.1999	1.06	0.0841
Tb927.6.3420	Oligomerisation domain containing protein, putative	ZUnknown	Tb927.06.3420	-	1432	664	-0.4274	1.55e-06	-0.5023	0.167431	-0.5023	0.0778	1.42	0.7254	0	0	0	0	-1.0619	0.1145	0.988	0.136	1.05	0.0704
Tb927.7.6100	hypothetical protein	ZUnknown	Tb927.07.6100	-	2940	779	0.0073	0.951	0.3488	0.38061	0.1748	0.748	1.15	0.7225	0	0	0	0	0.9455	0.5042	0.335	1.0184	1.27	0.3448
Tb927.4.3030	hypothetical protein, conserved	ZUnknown	Tb927.04.3030	+	1592	988	-0.6558	1.82e-19	0.0609	1	0.0378	0.999	1.16	0.7225	1	0	0	0	-0.0088	-0.3985	0.161	0.1441	1.16	0.2141
Tb927.10.8840	hypothetical protein, conserved	ZUnknown	Tb927.10.08840	+	854	834	0.1804	0.0464	0.0987	1	0.0915	0.999	1.35	0.7225	0	0	0	0	-0.3473	-0.3027	0.405	0.2429	1.09	0.1243
Tb927.5.2820	NEK9 protein kinase	Protein.kinase	Tb927.05.2820	-	4529	2291	-0.2417	2.9e-05	0.3532	0.772693	0.5924	0.134	1.17	0.7225	0	0	0	0	1.8448	0.9972	0.265	0.2601	1.07	0.0976
Tb927.5.2120	hypothetical protein, conserved, trypanosome-specific	ZUnknown	Tb927.05.2120	-	4880	1757	-0.2377	0.000803	0.7828	0.350286	0.7394	0.243	1.2	0.7225	0	0	0	0	2.4389	0.6379	-0.227	0.2812	1.02	0.0286
Tb927.11.6570	transporter, putative. 14 TM domains, SSF103473 general substrate transporter family	Transporter	Tb927.11.06570	-	NA	6649	0.6983	8.34e-57	-0.0049	1	-0.0048	0.999	0.96	0.7225	0	1	0	0	-0.2507	0.3222	0.752	-1.314	1.01	0.0144
Tb927.7.4470	translocon-associated protein gamma 4 transmembrane domains	Vesicular.transport	Tb927.07.4470	-	909	4966	-0.4481	1.6e-09	-0.0492	1	-0.0605	0.999	0.45	0.7225	0	0	0	0	1.7331	-0.3398	-0.338	0.0269	1.01	0.0144
Tb927.9.12790	dolichol kinase, putative	Glycans	Tb927.09.12790	+	NA	2054	0.7146	2.5e-32	0.1899	1	0.0944	0.999	1.22	0.7195	0	1	0	0	0.4903	0.834	0.127	0.3195	1.45	0.5361
Tb927.10.9180	PRA1 family protein, putative	ZUnknown	Tb927.10.09180	+	2055	2050	0.3816	4.09e-11	0.547	0.0940408	0.4474	0.0161	1.33	0.7195	0	0	0	0	0.065	0.0943	-0.019	-0.1412	1.27	0.3448
Tb927.1.1820	hypothetical PIN domain-containing protein	RNA.processing	Tb927.01.1820	+	1340	1554	-0.328	2.49e-07	0.1496	1	0.1539	0.999	1.5	0.7195	0	0	0	0	0.3376	0.4907	0.287	0.7498	1.11	0.1506
Tb927.2.6000	GPI phospholipase C	GPI.anchors	Tb927.02.6000	+	4973	6041	-0.5424	1.88e-24	0.6355	0.52761	0.5188	0.556	1.14	0.7166	0	0	0	0	2.9051	-0.333	-0.142	2.9875	1.3	0.3785
Tb927.7.490	hypothetical protein, conserved, trypanosome-specific	ZUnknown	Tb927.07.0490	-	1910	603	0.11	0.286	-0.1227	1	-0.1054	0.999	1.21	0.7166	0	0	0	0	0.4136	-0.0098	0.982	-0.6395	1.1	0.1375
Tb927.11.3030	phosphoribosylpyrophosphate synthetase, putative (PRS)	PPP	Tb927.11.03030	-	NA	2693	-0.4133	6.33e-13	-0.1191	1	-0.1363	0.999	1.4	0.7166	0	0	0	0	-1.0057	0.59	0.754	-0.7982	1.02	0.0286
Tb927.10.2750	deoxyhypusine synthase	Amino.acids	Tb927.10.02750	+	2379	1215	-0.2722	0.000193	-0.3592	0.614116	-0.3993	0.25	1.32	0.7166	0	0	0	0	-0.3011	0.1352	0.599	-0.2661	1	0
Tb927.8.3780	MORN repeat, putative	ZUnknown	Tb927.08.3780	-	978	687	-0.013	0.921	0.1486	1	0.1461	0.999	0.6	0.7166	0	0	0	0	-0.7322	-0.0196	-0.161	-0.0535	0.99	-0.0145
Tb927.11.10070	Bromodomain protein BDF3	Chromatin	Tb927.11.10070	+	NA	998	-0.1201	0.156	0.0832	1	0.039	0.999	0.93	0.7166	0	0	0	0	-0.5153	-0.0989	-0.444	-0.6097	0.97	-0.0439
Tb927.7.960	protein kinase, putative	Protein.kinase	Tb927.07.0960	+	5598	4936	-0.3524	5.74e-13	1.2893	0.00196693	1.3851	0.000513	0.69	0.7166	0	0	0	1	1.3675	0.613	-0.038	0.3732	0.88	-0.1844
Tb927.11.2500	carboxypeptidase, putative,metallo-peptidase, Clan MA(E) Family M32	Protease	Tb927.11.02500	-	NA	4387	0.163	0.00195	-0.1955	1	-0.2649	0.719	1.07	0.7137	0	0	0	0	-1.4176	-0.247	0.159	-1.8047	2.26	1.1763
Tb927.9.8400	predicted zinc finger protein, RING finger	Ubiquitin.proteasome	Tb927.09.08400	-	NA	2040	-0.1553	0.0124	0.0809	1	0.053	0.999	1.07	0.7108	0	0	0	0	-0.7259	0.2132	0.419	0.4008	1.35	0.433
Tb927.5.2370	hydrolase, alpha/beta fold family, putative	Enzyme	Tb927.05.2370	+	1668	832	-0.1971	0.0303	-0.2128	0.918188	-0.2227	0.561	1.2	0.7108	0	0	0	0	0.8798	-0.1719	0.124	-0.3098	1.14	0.189
Tb927.11.5030	hypothetical protein, conserved	ZUnknown	Tb927.11.05030	+	NA	1094	0.1767	0.0197	0.0586	1	0.0421	0.999	1.53	0.7108	0	0	0	0	-0.6277	-0.0582	0.499	-0.2509	1.09	0.1243
Tb927.6.2800	hypothetical protein, conserved	ZUnknown	Tb927.06.2800	+	3485	1917	0.1474	0.0189	-0.0549	1	-0.0178	0.999	1.39	0.7108	0	0	0	0	-0.0075	0.5174	0.533	1.2308	1.08	0.111
Tb927.10.6860	endonuclease V, cleaves RNA at inosines	RNA.degradation	Tb927.10.06860	+	1779	949	0.1351	0.101	-0.1563	1	-0.1354	0.999	0.97	0.7108	0	0	0	0	-0.3481	-0.3512	0.475	0.2003	1.06	0.0841
Tb927.11.3300	SAS4	Cytoskeleton	Tb927.11.03300	+	NA	4914	-0.2581	1.27e-05	0.8641	0.0825751	0.7803	0.0574	1.27	0.7108	0	0	0	0	0.7594	0.8179	-0.231	0.2563	1.03	0.0426
Tb927.9.8500	hypothetical protein	ZUnknown	Tb927.09.08500	-	NA	951	0.2785	0.000964	-0.215	0.895642	-0.2302	0.814	1.23	0.7019	0	0	0	0	-2.1054	0.616	1.475	-0.9524	1.21	0.275
Tb927.11.5330	hypothetical protein, conserved	ZUnknown	Tb927.11.05330	+	NA	1312	0.1095	0.146	-0.1951	1	-0.2146	0.913	0.9	0.7019	0	0	0	0	-1.3443	0.5696	0.877	-0.475	1.06	0.0841
Tb927.9.13820	KMP-11	Cytoskeleton	Tb927.09.13820	-	446	22450	-0.1926	0.000464	0.0539	1	-22.1743	0	0.25	0.7019	0	0	0	0	#N/A	#N/A	-1.28	-1.2813	0.84	-0.2515
Tb927.9.7260	phytanoyl-CoA dioxygenase (PhyH), putative	ZUnknown	Tb927.09.07260	+	NA	1173	0.1235	0.114	-0.3035	0.679374	-0.3064	0.382	1.51	0.699	0	0	0	0	0.1716	0.2539	0	-0.2323	1.05	0.0704
Tb927.11.12870	hypothetical protein, conserved	ZUnknown	Tb927.11.12870	-	NA	2701	-0.1086	0.0738	-0.0323	1	0.0817	0.999	0.74	0.699	0	0	0	0	#N/A	0.0132	0.116	0.0771	0.99	-0.0145
Tb927.10.10710	hypothetical protein, conserved	ZUnknown	Tb927.10.10710	-	1404	1014	0.1208	0.161	0.0037	1	0.0156	0.999	1	0.699	0	0	0	0	-0.1802	-0.2049	0.087	-0.1057	0.98	-0.0291
Tb927.11.3520	Acyl CoA binding protein, putative	ZUnknown	Tb927.11.03520	+	NA	591	0.157	0.147	-0.0059	1	0.0834	0.999	1.5	0.699	0	0	0	0	-0.222	-0.2342	0.394	0.5485	0.96	-0.0589
Tb927.10.9310	Haemolysin-III related, putative	ZUnknown	Tb927.10.09310	+	1222	1215	-0.0228	0.824	0.1757	1	0.1877	0.999	1.41	0.699	0	0	0	0	0.594	-0.2138	-0.494	0.368	0.87	-0.2009
Tb927.11.6030	ras-like small GTPase, putative (TbRLP)	Signalling	Tb927.11.06030	-	NA	319	-0.372	0.00907	-0.1057	1	-0.0978	0.999	1.21	0.693	0	0	0	0	0.0078	-0.0901	0.225	0.5792	1.25	0.3219
Tb927.7.4920	hypothetical protein, conserved	ZUnknown	Tb927.07.4920	-	3905	5428	0.1077	0.0761	0.6229	0.139964	0.5757	0.00851	1.06	0.693	0	0	0	0	0.1681	0.4762	-0.027	1.1109	1.05	0.0704
Tb927.10.280	cytochrome oxidase subunit VI (COXVI)	Mito.e.transport	Tb927.10.00280	+	703	1214	0.5288	7.14e-13	0.1032	1	0.0865	0.999	0.66	0.693	0	0	0	0	-2.3033	-0.1633	0.405	-1.448	1.04	0.0566
Tb927.7.4170	Elongase 2	Lipids	Tb927.07.4170	+	1590	3903	-0.0833	0.597	0.1362	1	0.1396	0.999	1.07	0.693	0	0	0	0	-0.1479	-0.3955	-0.492	-1.2492	1	0
Tb927.6.850	NOT2	RNA.degradation	Tb927.06.0850	-	4107	1946	0.2276	0.000759	0.8023	0.242334	0.7369	0.27	1.1	0.693	0	0	0	0	-0.2424	0.6213	0.41	-0.1432	0.83	-0.2688
Tb927.3.1220	GIY-YIG catalytic domain containing protein, putative	ZUnknown	Tb927.03.1220	+	2118	1322	0.4074	2.28e-09	0.1038	1	0.0932	0.999	1.49	0.69	0	0	0	0	-0.2846	0.2505	0.609	0.5031	1	0
Tb927.7.3140	hypothetical protein, conserved	ZUnknown	Tb927.07.3140	+	1241	698	0.2582	0.00412	-0.1028	1	-0.1186	0.999	1.09	0.69	0	0	0	0	-0.0932	-0.1142	0.639	-0.7734	0.95	-0.074
Tb927.4.2440	SET13	Mito.pathway	Tb927.04.2440	+	1779	953	0.0835	0.381	-0.1259	1	-0.1649	0.507	1.53	0.69	0	0	0	0	-0.7195	0.393	0.75	-0.4998	0.93	-0.1047
Tb927.6.4580	Mitochondrial SSU ribosomal protein, putative	Mito.translation	Tb927.06.4580	-	509	484	-0.0581	0.681	-0.205	0.998014	-0.2241	0.903	0.57	0.6871	0	0	0	0	-1.1968	-0.0129	0.16	-0.4095	1.07	0.0976
Tb927.8.1230	hypothetical protein, conserved	ZUnknown	Tb927.08.1230	-	1047	1390	-0.0816	0.333	-0.0428	1	-0.0651	0.999	0.77	0.6871	0	0	0	0	-0.69	-0.6002	-0.017	-0.4259	1.01	0.0144
Tb927.5.1950	hypothetical protein, conserved	ZUnknown	Tb927.05.1950	+	3370	2301	-0.3849	9.09e-13	-0.1068	1	-0.1036	0.999	0.98	0.6871	0	0	0	0	1.5617	0.6796	0.296	1.2707	0.82	-0.2863
Tb927.11.1010	chaperone DNAj, putative, J18	Chaperone	Tb927.11.01010	+	NA	1248	0.08	0.334	-0.0764	1	-0.1012	0.999	1.49	0.6841	0	0	0	0	-0.7374	0.0621	0.022	-0.0896	1.14	0.189
Tb927.9.4930	divalent cation transporter, putative	ZUnknown	Tb927.09.04930	+	NA	1108	0.2122	0.00787	-0.155	1	-0.1498	0.999	1.2	0.6841	0	0	0	0	-0.8312	0.1757	0.452	-0.3587	1.08	0.111
Tb927.10.3860	SNF-7-like protein, putative	DNA	Tb927.10.03860	-	898	774	0.0588	0.546	0.2495	0.885244	0.2421	0.866	1.27	0.6841	0	0	0	0	-0.5481	0.15	0.007	0.3981	1.04	0.0566
Tb927.8.3820	hypothetical protein, conserved, kinetoplastid-specific	ZUnknown	Tb927.08.3820	-	4326	1271	-0.2724	0.000502	-0.121	1	-0.0365	0.999	1.25	0.6841	0	0	0	0	0.9334	0.1374	0.644	0.4439	1.02	0.0286
Tb927.10.650	TAX-2, flagellar protein	Cytoskeleton	Tb927.10.00650	+	1173	1086	0.0142	0.893	0.1552	0.893854	0.1077	0.999	0.86	0.6841	0	0	0	0	-0.0098	-0.5755	-0.498	-0.126	0.99	-0.0145
Tb927.7.3040	hypothetical protein, conserved	ZUnknown	Tb927.07.3040	+	4905	2965	-0.0541	0.414	0.4732	0.732826	0.4634	0.547	1.34	0.6841	0	0	0	0	0.2502	0.8414	0.117	-0.1871	0.92	-0.1203
Tb927.10.3700	AMPKgamma	Protein.kinase	Tb927.10.03700	-	2416	1418	-0.1607	0.0307	0.4766	0.185762	0.3966	0.383	0.69	0.6811	0	0	0	0	0.2478	0.5622	-0.037	0.1234	1.26	0.3334
Tb927.10.10040	hypothetical protein	ZUnknown	Tb927.10.10040	+	1010	238	0.4331	0.00549	0.9127	0.00153114	0.8753	0.0115	1.56	0.6811	0	0	0	1	#N/A	-0.1884	0.391	-0.6868	1.16	0.2141
Tb927.9.3880	DNA polymerase beta thumb, putative	ZUnknown	Tb927.09.03880	+	NA	1136	0.0313	0.731	0.1528	1	0.1399	0.999	1.35	0.6811	0	0	0	0	#N/A	#N/A	0.418	1.1326	1.12	0.1635
Tb927.5.2010	hypothetical protein	ZUnknown	Tb927.05.2010	+	8671	671	-1.2758	1.4e-36	0.5688	0.50344	0.5766	0.382	1.17	0.6811	1	0	0	0	1.2673	-0.7367	0.246	1.0997	1.01	0.0144
Tb927.11.2210	diacylglycerol acyltransferase, putative	Lipids	Tb927.11.02210	+	NA	6667	-0.1418	0.00126	0.2106	1	0.1957	0.999	0.65	0.6811	0	0	0	0	1.931	0.4447	0.047	0.622	1	0
Tb927.7.2550	proteasome regulatory ATPase subunit 5 (RPT5)	Ubiquitin.proteasome	Tb927.07.2550	-	2972	2904	-0.1436	0.0277	0.1031	1	-0.1294	0.974	0.98	0.6781	0	0	0	0	0.7771	0.2715	-0.27	-0.2971	1.45	0.5361
Tb927.2.2460	SUMO-conjugating enzyme e2, UBC9	Ubiquitin.proteasome	Tb927.02.2460	-	2594	904	0.2657	0.000846	0.5335	0.849172	0.475	0.0844	1.28	0.6781	0	0	0	0	0.4128	0.0853	0.062	0.3795	1.11	0.1506
Tb927.10.10350	protein kinase, putative	Protein.kinase	Tb927.10.10350	-	3531	2396	-0.0153	0.861	-0.1418	1	-0.1544	0.999	1.16	0.6781	0	0	0	0	0.8107	0.8099	0.646	0.287	1.11	0.1506
Tb927.7.1600	DHCH bifunctional tetrahydrofolate dehydrogenase/cyclohydrolase	Folate	Tb927.07.1600	+	1615	1053	-0.2738	0.000457	-0.1125	1	-0.1359	0.983	1.08	0.6781	0	0	0	0	-0.6884	-0.2548	-0.063	-0.6466	0.98	-0.0291
Tb927.11.10040	hypothetical protein, conserved, no known domains	ZUnknown	Tb927.11.10040	+	NA	291	-0.0734	0.646	-0.087	1	-0.0999	0.999	1.31	0.6781	0	0	0	0	-1.4433	-0.1557	0.191	-1.0677	0.9	-0.152
Tb927.3.3240	hypothetical protein, conserved	ZUnknown	Tb927.03.3240	-	728	545	0.3623	0.00072	-0.0719	1	-0.0843	0.999	0.72	0.6751	0	0	0	0	-0.6066	-0.133	0.081	-0.1788	1.13	0.1763
Tb927.10.3290	hypothetical protein, conserved	ZUnknown	Tb927.10.03290	+	1181	625	-0.0188	0.879	-0.0319	1	-0.0472	0.999	1.38	0.6751	0	0	0	0	-0.7868	-0.1035	0.364	0.1403	1.11	0.1506
Tb927.10.14920	hypothetical protein, conserved, no clear yeast or human match	ZUnknown	Tb927.10.14920	+	4181	3262	-0.6974	1.97e-33	-0.2718	1	-0.2586	0.959	0.84	0.6751	1	0	0	0	2.0178	0.0634	0.263	-0.4278	1.06	0.0841
Tb927.8.5900	Sedlin, N-terminal conserved region, putative	ZUnknown	Tb927.08.5900	+	802	505	0.0817	0.594	0.0757	1	0.0162	0.999	1.25	0.6751	0	0	0	0	0.7787	-0.3488	-0.035	0.4098	0.91	-0.1361
Tb927.11.10010	vacuolar sorting-associated protein-like, putative	Lysosome	Tb927.11.10010	+	NA	1659	0.0399	0.617	0.1729	1	0.0846	0.984	1.2	0.672	0	0	0	0	0.3828	-0.3455	-0.03	-0.1402	1.12	0.1635
Tb927.10.6140	GPI-GlcNAc transferase	GPI.anchors	Tb927.10.06140	-	1453	964	-0.0013	0.989	0.2346	0.864399	0.1617	0.887	1.39	0.672	0	0	0	0	0.7959	-0.3336	-0.014	1.0203	1.07	0.0976
Tb927.5.4340	BBP65	Cytoskeleton	Tb927.05.4340	-	2224	1177	0.1999	0.006	0.4279	0.619731	0.4268	0.538	1.18	0.672	0	0	0	0	0.0069	0.0319	-0.255	0.0617	1.07	0.0976
Tb927.10.7240	KKT14 Kinetochore protein	Cell.cycle	Tb927.10.07240	-	2589	2148	0.1404	0.0205	0.1028	1	0.1038	0.999	1.47	0.669	0	0	0	0	0.2546	0.2265	-0.183	0.1688	0.99	-0.0145
Tb927.4.820	TFIIF-stimulated CTD phosphatase, putative	Protein.phosphatase	Tb927.04.0820	-	1645	762	-0.5187	4.17e-10	-0.476	0.230649	-0.5009	0.107	1.24	0.669	0	0	0	0	-0.9281	0.0497	0.001	0.1529	0.99	-0.0145
Tb927.8.2090	cyclophilin type peptidyl-prolyl cis-trans isomerase, copurifed with splicing complexes	RNA.processing	Tb927.08.2090	+	723	397	0.0172	0.911	-0.0817	1	-0.0811	0.999	1.5	0.669	0	0	0	0	-0.1691	-0.5176	0.01	-0.0081	0.88	-0.1844
Tb927.1.4420	ABC transporter, putative	Transporter	Tb927.01.4420	+	2995	2014	0.4293	1.01e-13	-0.0795	1	-0.0738	0.999	0.8	0.666	0	0	0	0	-0.9717	0.5771	0.419	-1.3208	1.19	0.251
Tb927.10.5140	protein kinase, putative,mitogen-activated protein kinase 2, putative	Protein.kinase	Tb927.10.05140	+	4237	2480	0.1877	0.00207	0.4187	0.464234	0.2451	0.824	1.46	0.666	0	0	0	0	0.9503	0.5857	0.093	0.6679	1.13	0.1763
Tb927.5.1580	ZC3H13	RNA.binding	Tb927.05.1580	-	3340	2042	-0.038	0.626	0.0666	1	0.0506	0.999	1.17	0.666	0	0	0	0	1.1184	0.9226	0.448	0.6015	1.13	0.1763
Tb927.10.5120	KREPA6	Mito.RNA	Tb927.10.05120	+	963	657	-0.1053	0.33	-0.0952	1	-0.1065	0.999	1.06	0.666	0	0	0	0	-0.5571	-0.3405	-0.242	-0.3337	1.12	0.1635
Tb927.8.1460	EamA-like transporter family, putative	ZUnknown	Tb927.08.1460	+	2135	1089	-0.2082	0.00868	0.2595	1	0.2032	0.999	1.39	0.666	0	0	0	0	1.2293	0.4278	-0.569	3.1532	0.99	-0.0145
Tb927.10.12110	hypothetical protein, conserved	ZUnknown	Tb927.10.12110	+	1436	336	-0.0435	0.769	0.0454	1	0.0571	0.999	0.92	0.666	0	0	0	0	-0.6313	-0.0305	-0.131	0.4111	0.95	-0.074
Tb927.6.4760	T-complex protein 11, putative	ZUnknown	Tb927.06.4760	+	2489	2366	0.0856	0.175	0.5934	0.110012	0.5918	0.048	1.2	0.663	0	0	0	0	0.3891	0.6991	-0.009	0.5467	1.29	0.3674
Tb927.10.1760	hypothetical protein	ZUnknown	Tb927.10.01760	+	609	156	0.1991	0.323	1.4746	2.7921e-06	1.4766	5.3e-05	0.62	0.663	0	0	0	1	-1.2272	0.6819	-0.569	-2.1775	1.14	0.189
Tb927.6.3770	hypothetical protein, conserved	ZUnknown	Tb927.06.3770	-	829	693	-0.0722	0.492	-0.3061	0.437584	-0.2849	0.716	0.99	0.663	0	0	0	0	-0.901	0.1213	0.542	0.3826	1.09	0.1243
Tb927.2.6080	hypothetical protein, conserved	ZUnknown	Tb927.02.6080	+	1600	1602	0.0039	0.968	-0.0472	1	-0.0541	0.999	1.08	0.663	0	0	0	0	0.0669	-0.1533	0.661	0.5678	1.08	0.111
Tb927.8.680	KREPA5	Mito.RNA	Tb927.08.0680	-	1277	306	-0.5219	7.74e-05	-0.4112	0.233518	-0.4625	0.264	1.13	0.663	0	0	0	0	-0.043	-0.1187	0.768	-0.032	1.07	0.0976
Tb927.9.12740	Zeta toxin, putative	ZUnknown	Tb927.09.12740	+	NA	719	0.319	0.000536	0.1207	1	0.1324	0.999	1.06	0.663	0	0	0	0	0.972	-0.4171	0.091	0.8078	1.05	0.0704
Tb927.8.2750	hypothetical protein, conserved	ZUnknown	Tb927.08.2750	+	1999	1334	0.1278	0.101	0.107	1	0.1382	0.999	1.28	0.663	0	0	0	0	0.8038	0.4167	0.232	0.0077	1.04	0.0566
Tb927.4.3090	hypothetical protein, conserved	ZUnknown	Tb927.04.3090	+	1563	538	-0.6498	2.27e-08	-0.181	0.984102	-0.204	0.719	1.33	0.663	1	0	0	0	0.701	0.1023	0.52	1.0207	0.99	-0.0145
Tb927.11.13300	Intraflagellar transport protein 25 IFT25	Cytoskeleton	Tb927.11.13300	-	NA	678	-0.1668	0.0733	0.1336	1	0.1104	0.999	0.85	0.663	0	0	0	0	0.3631	-0.4292	-0.678	-0.0407	0.99	-0.0145
Tb927.11.16070	TFIIH basal transcription factor subunit (p34)	RNA.synthesis	Tb927.11.16070	-	NA	881	0.0287	0.812	-0.1441	1	-0.1569	0.999	0.95	0.663	0	0	0	0	-1.3703	0.023	0.508	-0.1889	0.95	-0.074
Tb927.6.350	hypothetical protein, conserved, T. brucei specific, 2 C2H2 Zn fingers	Zinc.finger	Tb927.06.0350	-	918	719	0.4778	4.99e-07	0.4924	1	0.5254	0.914	1.53	0.6599	0	0	0	0	1.8113	0.5028	-1.807	2.8994	1.32	0.4005
Tb927.9.10870	hypothetical protein, conserved	ZUnknown	Tb927.09.10870	-	NA	1109	0.0372	0.703	0.1104	1	0.0376	0.999	1.29	0.6599	0	0	0	0	-0.3721	0.0228	0.39	0.2141	1.03	0.0426
Tb927.11.11740	membrane-bound acid phosphatase, putative	Phosphatase	Tb927.11.11740	+	NA	2316	0.2188	0.000526	0.6	0.284455	0.8237	0.0219	1.28	0.6599	0	0	0	0	-0.2034	0.6339	0.518	-0.8055	0.99	-0.0145
Tb927.10.6590	hypothetical protein, conserved	ZUnknown	Tb927.10.06590	+	3283	2033	0.0524	0.477	0.1748	1	0.2067	0.999	0.92	0.6569	0	0	0	0	0.3734	-0.0331	0.199	0.6649	1.2	0.263
Tb927.11.6680	AAT15 Polyamine transporter 2 POT2	Amino.acid.transport	Tb927.11.06680	-	NA	741	0.3242	0.000281	0.3155	0.864374	0.3189	0.508	1.03	0.6569	0	0	0	0	-0.5841	1.1241	0.823	-1.7479	1.1	0.1375
Tb927.10.13350	hypothetical protein, conserved	ZUnknown	Tb927.10.13350	-	3996	2210	-0.0822	0.183	-0.1973	0.980019	-0.2158	0.64	1.05	0.6569	0	0	0	0	0.3133	0.2882	0.242	0.1698	1.09	0.1243
Tb927.10.4160	predicted zinc finger protein	Zinc.finger	Tb927.10.04160	-	1224	1476	0.0737	0.36	0.2484	0.722429	0.2367	0.528	1.22	0.6569	0	0	0	0	1.4413	0.1266	0.073	1.8979	1	0
Tb927.4.5390	NRKA serine/threonine-protein kinase	Protein.kinase	Tb927.04.5390	-	1303	2398	0.2689	2.42e-06	0.0699	1	0.2161	0.914	1.35	0.6569	0	0	0	0	1.2085	0.1797	1.166	-0.9243	0.98	-0.0291
Tb927.11.4430	ferric reductase, putative,ferric reductase transmembrane component, putative	Enzyme	Tb927.11.04430	-	NA	2027	-0.5411	7.29e-19	-0.4688	0.66827	-0.7733	0.00202	1.07	0.6538	0	0	0	0	0.5733	0.3637	0.481	-0.27	1.66	0.7312
Tb927.8.1310	mitochondrial carrier protein, MCP15	Mito.transport	Tb927.08.1310	-	2717	742	0.0833	0.386	-0.099	1	-0.1034	0.999	1.07	0.6538	0	0	0	0	0.3814	0.3842	-0.071	-0.4441	1.01	0.0144
Tb927.9.3970	alpha/beta-hydrolase-like protein	Enzyme	Tb927.09.03970	+	NA	1065	-0.1108	0.189	-0.0464	1	-0.0172	0.999	0.94	0.6508	0	0	0	0	-0.7088	0.1957	-0.009	-0.1299	1.3	0.3785
Tb927.11.3760	hypothetical protein	ZUnknown	Tb927.11.03760	+	NA	1994	-0.261	5.03e-05	0.9759	0.117918	0.8382	0.0995	1.2	0.6508	0	0	0	0	1.3438	0.1994	-0.027	2.6201	1.02	0.0286
Tb927.3.5350	hypothetical protein, conserved, no known domains	ZUnknown	Tb927.03.5350	+	1444	938	-0.3783	1.2e-06	-0.0655	1	-0.0654	0.999	0.67	0.6508	0	0	0	0	-0.5597	-0.8399	-0.702	-1.1791	1.01	0.0144
Tb927.3.4650	C-8 sterol isomerase, putative	Sterols	Tb927.03.4650	-	1534	536	0.1354	0.226	-0.1556	1	-0.131	0.921	1.41	0.6508	0	0	0	0	-2.6799	0.4794	0.326	-1.9002	0.99	-0.0145
Tb927.9.2730	hypothetical protein, conserved	ZUnknown	Tb927.09.02730	-	NA	4067	0.1376	0.00781	0.0805	1	0.0255	0.999	0.64	0.6477	0	0	0	0	1.0694	0.8807	0.437	0.2055	1.2	0.263
Tb927.11.12140	hypothetical protein	ZUnknown	Tb927.11.12140	+	NA	479	0.5897	0.0633	1.4986	0.0520726	1.2732	0.149	0.88	0.6477	0	0	0	0	#N/A	-0.5943	-0.422	2.4523	0.88	-0.1844
Tb927.11.8110	hypothetical protein, conserved	ZUnknown	Tb927.11.08110	+	NA	832	0.0242	0.818	-0.1292	1	-0.1326	0.999	1.26	0.6446	0	0	0	0	-0.1034	0.0163	0.203	-0.2297	1.07	0.0976
Tb927.3.2090	aminopeptidase P1, putative,metallo-peptidase, Clan MG, Family M24	Protease	Tb927.03.2090	-	2583	2764	0.0625	0.316	-0.1196	1	-0.135	0.999	1.04	0.6446	0	0	0	0	0.0523	0.4255	0.285	-0.3867	1.02	0.0286
Tb927.3.1730	hypothetical protein, conserved	Mito.pathway	Tb927.03.1730	-	974	645	0.2126	0.0279	-0.0979	1	-0.0671	0.999	0.88	0.6446	0	0	0	0	-0.6157	-0.5594	0.248	-0.7823	0.77	-0.3771
Tb927.10.5270	MKK5 protein kinase	Protein.kinase	Tb927.10.05270	+	1332	1067	0.4066	8.36e-08	0.2004	0.832724	0.11	0.852	1.31	0.6385	0	0	0	0	0.0689	0.121	0.696	0.4492	1.47	0.5558
Tb927.8.3430	MKS1	Cytoskeleton	Tb927.08.3430	+	1506	822	-0.813	1.94e-25	-0.4785	0.145978	-0.4472	0.00439	1.19	0.6385	1	0	0	0	-0.5662	-0.09	0.27	0.1932	1.16	0.2141
Tb927.4.4900	hypothetical protein	ZUnknown	Tb927.04.4900	-	2772	1077	-0.1955	0.0125	1.1643	0.000261491	0.9263	2.44e-06	1.31	0.6385	0	0	0	1	1.3512	0.8248	0.4	0.7052	1.15	0.2016
Tb927.1.1380	serine/threonine protein phosphatase 2A regulatory subunit, putative	Protein.kinase	Tb927.01.1380	+	4116	1960	-0.1312	0.0719	1.6832	1.45293e-05	1.7481	1.14e-06	0.76	0.6385	0	0	0	1	-0.1042	0.3447	-0.275	-0.0576	1.04	0.0566
Tb927.10.14280	mitochondrial carrier protein, MCP20	Mito.transport	Tb927.10.14280	-	1447	776	0.208	0.0194	-0.2237	0.978728	-0.2046	0.961	1.2	0.6385	0	0	0	0	-0.9375	-0.3343	0.045	-0.9885	1.03	0.0426
Tb927.10.4050	serine palmitoyltransferase, putative	Lipids	Tb927.10.04050	-	5824	3812	0.0941	0.113	1.7148	1.12807e-10	1.3573	0.00151	1.03	0.6354	0	0	0	1	0.5323	1.0447	0.033	0.4985	1.21	0.275
Tb927.8.6840	mismatch repair protein MLH1	DNA	Tb927.08.6840	-	2682	2099	0.1139	0.0923	0.3178	0.930277	0.2668	0.518	0.82	0.6354	0	0	0	0	0.4364	0.4289	-0.146	0.1419	1.16	0.2141
Tb927.8.1130	protein phosphatase with EF-Hand domains, putative	Protein.phosphatase	Tb927.08.1130	-	6939	3411	0.4993	1.46e-21	0.7284	0.283055	0.7563	0.186	0.78	0.6354	0	0	0	0	0.6573	1.5106	0.858	1.1928	1.13	0.1763
Tb927.10.13450	hypothetical protein, conserved	ZUnknown	Tb927.10.13450	-	4622	2341	-0.0244	0.74	1.0223	0.00257107	0.5264	0.0475	1.04	0.6354	0	0	0	1	0.5242	0.6013	0.145	-0.3816	1.11	0.1506
Tb927.3.1780	LSm8	RNA.processing	Tb927.03.1780	-	661	397	-0.0057	0.972	0.0017	1	-0.0353	0.999	1.03	0.6354	0	0	0	0	-1.113	-0.3847	0.052	-0.662	0.93	-0.1047
Tb927.6.4400	hypothetical protein, conserved	ZUnknown	Tb927.06.4400	-	2042	2553	-0.4944	4.77e-14	-0.4486	0.111218	-0.4414	0.603	1	0.6323	0	0	0	0	-0.288	-0.1806	0.19	0.1506	1.06	0.0841
Tb927.4.1790	60S ribosomal protein L3	Ribosome	Tb927.04.1790	-	1310	38008	-0.1426	0.000252	-0.3161	0.152852	-0.2959	0.999	1.01	0.6323	0	0	0	0	-1.311	0.4227	0.511	-0.6406	0.95	-0.074
Tb927.11.16650	hypothetical protein, conserved	ZUnknown	Tb927.11.16650	-	NA	1689	0.2585	0.000103	0.5044	0.0837977	0.5384	0.034	1.1	0.6323	0	0	0	0	-0.1927	0.4148	0.021	0.0486	0.92	-0.1203
Tb927.11.1640	hypothetical protein, conserved	ZUnknown	Tb927.11.01640	-	NA	976	0.4904	4.45e-08	0.1296	1	0.1279	0.796	1.35	0.6323	0	0	0	0	-0.3251	0.0482	0.355	0.4512	0.9	-0.152
Tb927.10.9750	ubiquitin-protein ligase, putative (upl3)	Ubiquitin.proteasome	Tb927.10.09750	+	8359	6526	-0.0965	0.0314	0.3141	0.957614	0.2668	0.917	0.59	0.6292	0	0	0	0	1.3756	1.2507	0.417	0.7291	1.33	0.4114
Tb927.10.6220	XRND	RNA.degradation	Tb927.10.06220	-	2888	2291	-0.2382	4.11e-05	-0.2851	0.958267	-0.2779	0.881	0.75	0.6292	0	0	0	0	-0.8893	0.1409	1.065	-0.7243	1.1	0.1375
Tb927.6.1550	POMP30 leucine-rich repeat protein (LRRP)	LRRP	#N/A	#N/A	2369	1206	-0.6994	6.72e-24	-0.5458	0.633373	-0.5523	0.534	1.23	0.6292	1	0	0	0	-1.016	0.3566	0.899	-0.7273	1.06	0.0841
Tb927.6.4790	hypothetical protein, conserved	ZUnknown	Tb927.06.4790	+	840	701	0.2465	0.00684	0.1612	1	0.1456	0.999	1.29	0.6292	0	0	0	0	-1.3562	-0.2437	-0.011	0.13	0.98	-0.0291
Tb927.5.3620	kinetoplastid-specific dual specificity phosphatase, putative	Phosphatase	Tb927.05.3620	+	5308	2469	-0.496	2.66e-17	1.0234	0.143083	1.1676	0.0314	0.73	0.6292	0	0	0	0	1.0508	0.659	0.193	0.8211	0.69	-0.5353
Tb927.7.4320	mRNA capping enzyme, beta chain, putative	ZUnknown	Tb927.07.4320	-	882	516	0.3171	0.00211	0.014	1	-0.0307	0.999	1.33	0.626	0	0	0	0	-0.2116	0.1215	0.373	0.0474	1.12	0.1635
Tb927.10.9330	hypothetical protein, conserved, partial PSP1 superfamily (signal peptidase-like), copuriifes with ZC3H12	ZUnknown	Tb927.10.09330	+	2080	3174	-0.1359	0.016	0.1747	1	0.1696	0.999	1.24	0.626	0	0	0	0	1.4154	0.6025	-0.017	0.427	1.1	0.1375
Tb927.10.6440	Phosphomannomutase PMM, acts as phosphoglucomutase	Glucose.glycerol	Tb927.10.06440	+	950	922	-0.149	0.0951	-0.4892	0.823522	-0.4982	0.774	1.04	0.626	0	0	0	0	-0.4678	-0.3423	-0.296	-0.4154	1.09	0.1243
Tb927.3.940	Complex 1 protein (LYR family), putative	Mito.e.transport	Tb927.03.0940	+	1012	480	0.4616	9.57e-06	-0.2312	0.459169	-0.2411	0.446	1.11	0.626	0	0	0	0	-1.8092	0.0378	0.703	-1.6661	1.04	0.0566
Tb927.9.6060	Erv homologue, FAD-linked sulfhydryl oxidase, POMP4	Mito.Biogenesis	Tb927.09.06060	+	NA	1001	0.1346	0.146	-0.0801	1	-0.0537	0.999	1.19	0.626	0	0	0	0	-1.6599	-0.2213	-0.167	#N/A	1.01	0.0144
Tb927.9.10470	hypothetical protein, conserved, no known domains	ZUnknown	Tb927.09.10470	-	NA	1527	0.2078	0.00153	-0.0375	1	-0.0499	0.999	1.28	0.626	0	0	0	0	-0.9159	0.0721	0.023	-0.3247	0.99	-0.0145
Tb927.3.2100	hypothetical protein, conserved	ZUnknown	Tb927.03.2100	-	2113	1986	-0.154	0.0166	0.0299	1	0.0373	0.999	1.01	0.6229	0	0	0	0	-0.7936	-0.1308	0.485	-1.2217	1.03	0.0426
Tb927.9.7580	hypothetical protein, conserved	ZUnknown	Tb927.09.07580	-	NA	1549	-0.4115	7.76e-11	-0.4424	0.345659	-0.4468	0.127	1.02	0.6198	0	0	0	0	-0.7161	-0.2849	-0.303	-0.3925	1.23	0.2987
Tb927.2.2430	CK2A2 casein kinase II	Protein.kinase	Tb927.02.2430	-	3245	1188	-0.1255	0.124	0.0351	1	0.0742	0.999	1.31	0.6198	0	0	0	0	0.5468	0.2875	0.144	-0.5046	1.07	0.0976
Tb927.9.13530	hypothetical protein, conserved	ZUnknown	Tb927.09.13530	-	NA	612	0.0308	0.809	-0.0579	1	-0.0724	0.999	1.13	0.6198	0	0	0	0	-0.0194	-0.4301	-0.064	0.1294	1.07	0.0976
Tb927.10.10210	procyclin-associated gene 4 (PAG4) protein (PAG4)	PAG	Tb927.10.10210	-	1122	206	1.3532	2.72e-15	0.7686	0.20555	0.9802	0.103	0.9	0.6167	0	1	0	0	0.8435	-0.0094	-1.626	2.5822	2.23	1.157
Tb927.7.7160	kinetoplastid-specific dual specificity phosphatase, putative	Phosphatase	Tb927.07.7160	-	6022	3079	0.2433	9.9e-06	0.9436	0.00127271	0.7786	0.0118	1.04	0.6167	0	0	0	1	1.6008	1.2019	0.453	1.0749	1.32	0.4005
Tb927.6.2300	Noa1 family protein, probably mitochondrial ribosome biogenesis,identifcal to 6.2350	Nucleotides	Tb927.06.2300	+	1290	7356	-0.4836	2.01e-20	0.1151	1	-0.017	0.999	1.19	0.6135	0	0	0	0	-3.0139	-0.2992	-0.409	-0.63	1.38	0.4647
Tb927.11.10180	hypothetical protein, conserved	ZUnknown	Tb927.11.10180	+	NA	1921	0.0271	0.73	0.1034	1	0.0732	0.999	1.19	0.6135	0	0	0	0	1.0022	-0.2199	0.274	0.6363	1.02	0.0286
Tb927.8.6170	transketolase, putative (TK)	PPP	Tb927.08.6170	+	2981	1429	0.1002	0.173	-0.5864	0.625019	-0.5828	0.155	0.98	0.6135	0	0	0	0	-3.8094	1.4447	1.062	-2.6906	0.99	-0.0145
Tb927.10.13430	citrate synthase, putative	Mito.citric.acid.cycle	Tb927.10.13430	-	2205	1013	0.0291	0.757	0.0772	1	0.0956	0.999	0.94	0.6135	0	0	0	0	0.1829	1.2785	-0.165	-1.43	0.99	-0.0145
Tb927.11.950	DRBD14	RNA.binding	Tb927.11.00950	+	NA	3155	-0.4422	1.12e-17	0.2268	0.964327	0.2263	0.862	1.09	0.6135	0	0	0	0	0.5176	-0.3296	0.548	-0.1858	0.76	-0.3959
Tb927.8.4930	hypothetical protein, conserved	Mito.pathway	Tb927.08.4930	+	1231	1118	0.1142	0.147	-0.1866	0.748106	-0.1978	0.441	1.49	0.6104	0	0	0	0	-0.4724	0.1061	0.29	-0.3831	1.22	0.2869
Tb927.7.4100	Domain of unknown function (DUF4201), putative	ZUnknown	Tb927.07.4100	+	2210	1926	0.0105	0.9	-0.0116	1	0.0161	0.999	1.33	0.6104	0	0	0	0	-0.2833	-0.2171	-0.506	-0.255	1.12	0.1635
Tb927.8.4050	flagellar membrane protein that interacts with FLA1, similar to FLA3	Membrane.protein	Tb927.08.4050	-	3046	2272	0.3154	6.93e-08	0.0419	1	0.008	0.999	1.1	0.6104	0	0	0	0	-0.761	0.8466	0.915	-1.6011	1.04	0.0566
Tb927.10.9940	Predicted membrane protein, putative	ZUnknown	Tb927.10.09940	+	719	329	-0.1441	0.343	-0.2008	1	-0.1681	0.965	1.03	0.6104	0	0	0	0	0.0703	-0.1876	0.65	0.5636	0.98	-0.0291
Tb927.8.7760	hypothetical protein, conserved, collagen-binding domain, quite serine-rich	ZUnknown	Tb927.08.7760	+	4046	1993	0.0661	0.318	0.6758	0.0494065	0.6268	0.028	1.07	0.6072	0	0	0	1	1.5071	0.9819	-0.296	2.1006	1.14	0.189
Tb927.6.3690	CFII	RNA.processing	Tb927.06.3690	-	1468	1206	-0.4844	3.88e-11	-0.6041	0.0918343	-0.6124	0.00195	1.2	0.6072	0	0	0	0	-1.1127	-0.2565	0.312	-0.0813	1.13	0.1763
Tb927.11.7800	hypothetical protein, conserved	ZUnknown	Tb927.11.07800	-	NA	2619	-0.4834	3.2e-14	0.529	0.448249	0.4414	0.673	0.92	0.6072	0	0	0	0	0.7441	0.3125	-0.573	1.2465	1.12	0.1635
Tb927.11.470	transcription factor, putative,transcription factor IIIb, putative	RNA.synthesis	Tb927.11.00470	-	NA	1381	-0.2375	0.00046	-0.1078	1	-0.1108	0.999	0.89	0.6072	0	0	0	0	0.202	-0.131	-0.022	0.3896	1.12	0.1635
Tb927.10.11940	ABC1 protein, putative	Transporter	Tb927.10.11940	+	2339	1268	0.4391	5.29e-11	0.3185	0.818861	0.2926	0.401	1.22	0.6041	0	0	0	0	0.7305	0.2984	0.726	1.8927	1.31	0.3896
Tb927.6.2630	Hsp33 protein, putative	Mito.pathway	Tb927.06.2630	+	1421	1278	0.1227	0.133	-0.1854	1	-0.1636	0.999	1.26	0.6041	0	0	0	0	-1.1357	-0.1528	0.047	0.1045	1.08	0.111
Tb927.11.2020	hypothetical protein, conserved	ZUnknown	Tb927.11.02020	+	NA	633	0.3252	0.000404	-0.0818	1	-0.0751	0.999	1.16	0.6041	0	0	0	0	-1.3255	0.0882	0.67	-0.6464	1	0
Tb927.7.7090	hypothetical protein, conserved, no clear yeast or human matches	ZUnknown	Tb927.07.7090	-	1669	1022	0.89	5.52e-28	0.2788	1	0.2861	0.965	0.85	0.6009	0	1	0	0	-2.3684	-0.2458	-0.04	-1.8783	2.24	1.1635
Tb927.9.10670	Bardet-Biedl syndrome 1 protein homolog (BBS1-like protein 1), putative	Cytoskeleton	Tb927.09.10670	-	NA	1368	0.0501	0.52	0.2583	0.843781	0.2512	0.546	1.06	0.6009	0	0	0	0	0.4603	0.0902	0.201	0.6841	1.11	0.1506
Tb927.11.10620	hypothetical protein, conserved	ZUnknown	Tb927.11.10620	+	NA	797	0.3068	0.00111	0.1459	1	0.149	0.999	0.58	0.6009	0	0	0	0	0.2159	-0.9163	-0.528	-0.3127	1.09	0.1243
Tb927.8.5180	LSm2	RNA.processing	Tb927.08.5180	+	550	437	-0.0936	0.442	-0.0751	1	-0.076	0.999	1.17	0.6009	0	0	0	0	-1.0581	-0.386	0.257	0.0112	1.06	0.0841
Tb927.1.4340	hypothetical protein, conserved	ZUnknown	Tb927.01.4340	+	2151	2145	-0.0998	0.148	0.4431	0.449792	0.4822	0.219	1.33	0.6009	0	0	0	0	-0.1006	0.2412	0.121	0.6489	1.01	0.0144
Tb927.2.6090	60S ribosomal protein L44	Ribosome	Tb927.02.6090	+	NA	5121	-0.0677	0.238	-0.2279	0.886639	-0.2419	0.857	0.51	0.5977	0	0	0	0	#N/A	#N/A	0.879	-0.8829	1.01	0.0144
Tb927.5.470	Riboflavin transporter	Transporter	Tb927.05.0470	-	2268	2592	1.1499	5.04e-52	0.581	0.805549	0.5619	0.747	1.16	0.5945	0	1	0	0	1.9544	0.3261	0.381	0.8828	1.27	0.3448
Tb927.11.13950	Mut7-C RNAse domain containing protein, putative	ZUnknown	Tb927.11.13950	+	NA	698	0.0362	0.745	-0.0826	1	-0.2618	0.582	1.4	0.5945	0	0	0	0	0.6054	-0.2502	0.235	0.579	1.01	0.0144
Tb927.5.4280	Zinc finger, C3HC4 type (RING finger), putative	Zinc.finger	Tb927.05.4280	-	1762	1629	0.0089	0.911	0.0788	1	0.0724	0.999	1.25	0.5945	0	0	0	0	0.6772	-0.2438	0.039	1.0586	0.97	-0.0439
Tb927.4.3400	hypothetical protein, conserved, ARM repeat	ZUnknown	Tb927.04.3400	-	1830	2313	-0.3979	1.24e-13	0.4533	0.357547	0.4527	0.129	1.28	0.5945	0	0	0	0	1.4142	0.3754	0.605	1.1864	0.9	-0.152
Tb927.8.4940	hypothetical protein, conserved	ZUnknown	Tb927.08.4940	+	2820	2007	0.0762	0.324	-0.0481	1	-0.0447	0.999	1.18	0.5914	0	0	0	0	-0.0292	0.5391	0.03	0.0362	2.37	1.2449
Tb927.5.1060	Complex III beta-MMP subunit of cytochrom b/c1 complex	Mito.e.transport	Tb927.05.1060	+	2044	1529	0.3332	4.32e-06	-0.1503	0.987823	-0.2103	0.999	1.18	0.5914	0	0	0	0	-2.0092	0.7213	0.2	-2.5161	1.21	0.275
Tb927.1.3560	CEP164C	Cytoskeleton	Tb927.01.3560	-	3400	2245	-0.1345	0.0388	0.1929	0.977161	0.1068	0.999	1.26	0.5914	0	0	0	0	1.671	0.4697	-0.111	0.1619	1.01	0.0144
Tb927.10.6580	hypothetical protein	ZUnknown	Tb927.10.06580	+	3747	2363	0.4823	2.09e-18	0.8504	0.165992	0.6074	0.0808	1.02	0.5882	0	0	0	0	0.6184	0.7283	-0.086	0.7898	1.41	0.4957
Tb927.10.4880	hypothetical protein, possible component of cytochorome oxidase complex	Mito.e.transport	Tb927.10.04880	-	1046	1173	0.7732	2.88e-27	0.1357	1	0.0951	0.999	1.09	0.5882	0	1	0	0	-3.6363	0.0933	0.445	-2.0171	1.26	0.3334
Tb927.7.6250	CEP120A	Cytoskeleton	Tb927.07.6250	-	1815	817	-0.0301	0.821	0.1281	0.943182	0.114	0.974	0.97	0.5882	0	0	0	0	-0.3007	-0.0689	-0.187	0.1312	1.1	0.1375
Tb927.2.4650	hypothetical protein, conserved	ZUnknown	Tb927.02.4650	-	1062	529	0.0068	0.959	-0.1143	1	-0.1096	0.956	1.25	0.5882	0	0	0	0	-1.0765	-0.0287	0.954	-0.0322	1.02	0.0286
Tb927.10.13500	60S ribosomal protein L10a	Ribosome	Tb927.10.13500	-	1299	20468	-0.2403	5.59e-06	-0.3199	0.069684	-0.4198	0.248	1.2	0.5882	0	0	0	0	-1.4883	0.0509	0.662	-0.9794	0.97	-0.0439
Tb927.11.5900	hypothetical protein, conserved	ZUnknown	Tb927.11.05900	+	NA	354	-0.2421	0.0659	-0.2503	1	-0.1608	0.999	0.94	0.5882	0	0	0	0	-0.6002	0.3374	1.217	1.2279	0.95	-0.074
Tb927.4.4810	hypothetical protein, conserved	Vesicular.transport	Tb927.04.4810	-	2301	489	0.97	5.14e-23	1.088	0.00416646	0.6658	0.0458	1.18	0.585	0	1	0	1	0.0101	0.3281	0.735	0.6056	2.46	1.2987
Tb927.4.5040	dihydrolipoamide dehydrogenase, putative	Enzyme	Tb927.04.5040	-	2437	838	0.2582	0.00206	0.0505	1	0.0288	0.999	1.22	0.585	0	0	0	0	-0.7095	0.632	0.695	-0.0353	1.09	0.1243
Tb927.11.9260	hypothetical protein, conserved	ZUnknown	Tb927.11.09260	+	NA	772	-0.3312	0.000154	0.0705	1	0.0955	0.981	1.18	0.585	0	0	0	0	0.5822	-0.3994	-0.407	0.2538	1.02	0.0286
Tb927.11.11620	hypothetical protein, conserved	Mito.pathway	Tb927.11.11620	+	NA	833	0.2972	0.000651	0.1101	1	0.1156	0.999	1.24	0.585	0	0	0	0	-0.2738	0.2312	1.092	-0.1792	1.01	0.0144
Tb927.11.5390	Tim8-13	Mito.biogenesis	Tb927.11.05390	+	NA	317	0.071	0.64	0.0094	1	-0.0326	0.999	0.71	0.585	0	0	0	0	-0.2875	0.1356	0.828	-0.8712	0.99	-0.0145
Tb927.10.6470	hypothetical protein	ZUnknown	Tb927.10.06470	+	1217	387	0.1594	0.201	0.0033	1	0.015	0.999	1.17	0.585	0	0	0	0	0.0729	0.009	-0.01	0.0371	0.94	-0.0893
Tb927.7.480	hypothetical protein, conserved	ZUnknown	Tb927.07.0480	-	4036	3823	0.1612	0.00147	0.793	0.0369367	0.6729	0.0207	1.17	0.5818	0	0	0	1	1.3016	0.2867	-0.122	1.297	1.93	0.9486
Tb927.7.4510	Domain of unknown function (DUF4201), putative	ZUnknown	Tb927.07.4510	-	1699	1476	0.0454	0.626	0.0108	1	0.0303	0.999	0.66	0.5818	0	0	0	0	0.3494	-0.2974	0.234	-0.2944	1.14	0.189
Tb927.10.13440	hypothetical protein, conserved	ZUnknown	Tb927.10.13440	-	2438	1235	0.0134	0.887	0.0012	1	-0.0259	0.999	1.42	0.5818	0	0	0	0	0.2603	0.0251	-0.053	0.2269	1.1	0.1375
Tb927.11.8460	amastin-like protein	Enzyme	Tb927.11.08460	+	NA	1097	-0.5556	2.68e-11	-0.5912	0.0231676	-0.6046	0.00301	1.25	0.5818	0	0	1	0	0.8048	-0.4555	0.037	1.5713	1.01	0.0144
Tb927.8.4510	nucleoside diphosphate kinase, putative	ZUnknown	Tb927.08.4510	-	2897	2000	0.2806	2.15e-06	0.652	0.0256574	0.5151	0.00238	1.32	0.5785	0	0	0	1	0.7586	0.2012	-0.104	0.8126	1.74	0.7991
Tb927.6.870	myotubularin, putative	Cytoskeleton	Tb927.06.0870	-	6628	6327	0.5071	1.93e-33	1.159	0.00356442	1.1257	0.000171	0.69	0.5785	0	0	0	1	0.2474	0.5481	-0.26	0.591	1.32	0.4005
Tb927.7.4300	F-box domain containing protein, putative	ZUnknown	Tb927.07.4300	-	1992	1105	0.1791	0.0319	-0.1564	0.844097	-0.134	0.667	1.31	0.5785	0	0	0	0	0.0503	0.0109	0.414	0.0345	1.05	0.0704
Tb927.10.16050	hypothetical protein, conserved	ZUnknown	Tb927.10.16050	+	839	484	0.0682	0.586	-0.0966	1	-0.1082	0.999	1.22	0.5785	0	0	0	0	-0.8817	-0.4838	0.028	-0.5769	1.04	0.0566
Tb927.6.4820	CPC1, chromosomal passenger complex	Chromatin	Tb927.06.4820	+	1142	717	-0.0557	0.584	-0.1138	1	-0.1027	0.999	1.13	0.5785	0	0	0	0	-0.1081	-0.2672	-0.219	-0.3473	0.99	-0.0145
Tb927.10.11760	PUF6	RNA.binding	Tb927.10.11760	+	6453	6802	-0.0131	0.822	0.8462	0.0140868	0.8443	0.0228	0.83	0.5753	0	0	0	1	-0.5029	0.7973	-0.009	0.3553	1.27	0.3448
Tb927.8.4540	PBP1	RNA.degradation	Tb927.08.4540	-	7016	5712	-0.4683	2.8e-21	1.7198	3.28164e-08	1.6731	4.73e-09	1.29	0.5753	0	0	0	1	1.6351	0.6259	-0.033	0.1122	1.16	0.2141
Tb927.4.4680	GINS complex subunit PSF3, replication initiation	DNA	Tb927.04.4680	-	548	190	-0.1162	0.522	0.1504	1	0.1692	0.981	1.23	0.5753	0	0	0	0	-0.7384	-0.4686	0.018	0.0989	1.16	0.2141
Tb927.10.3770	hypothetical protein, conserved,predicted TPR repeat protein	Mito.pathway	Tb927.10.03770	-	2549	1914	0.0453	0.517	-0.2387	0.840947	-0.2451	0.436	1.04	0.5753	0	0	0	0	-0.7758	0.264	1.282	-0.7196	1.13	0.1763
Tb927.6.1230	kinetoplastid-specific phospho-protein phosphatase	Protein.phosphatase	Tb927.06.1230	-	1725	1065	0.6948	1.8e-18	0.4044	0.200569	0.3747	0.0534	1.47	0.5753	0	1	0	0	-1.3026	-0.1699	0.998	-0.1677	1.12	0.1635
Tb927.10.12230	hypothetical protein, conserved	ZUnknown	Tb927.10.12230	+	1423	1583	0.4743	4.95e-14	0.3545	0.471314	0.3386	0.345	0.83	0.5753	0	0	0	0	-0.2609	0.0684	0.332	0.6453	1.12	0.1635
Tb927.7.840	Mitochondrial ATP synthase subunit, putative	Mito.pathway	Tb927.07.0840	-	800	984	0.2327	0.00919	-0.1582	1	-0.1546	0.988	0.8	0.5753	0	0	0	0	-2.373	-0.4448	-0.418	-2.0873	1.08	0.111
Tb927.11.11580	hypothetical protein, conserved	ZUnknown	Tb927.11.11580	+	NA	724	-0.1538	0.094	-0.0804	1	-0.0566	0.999	1.07	0.5753	0	0	0	0	-0.0828	0.1	0.679	-0.0959	1.03	0.0426
Tb927.3.3030	BOH1, hook complex protein, resemblance to myosin	Cytoskeleton	Tb927.03.3030	-	2231	1834	-0.0764	0.27	-0.0186	1	-0.0265	0.999	1.07	0.5753	0	0	0	0	-0.2163	0.6066	0.51	-0.604	0.99	-0.0145
Tb927.6.2570	hypothetical protein, conserved	ZUnknown	Tb927.06.2570	+	1514	1254	0.031	0.711	-0.1848	1	-0.203	0.979	1.21	0.5753	0	0	0	0	-1.068	-0.1663	-0.067	-0.1661	0.98	-0.0291
Tb927.9.8650	hypothetical protein, conserved, basic, has E/K-rich patch.	ZUnknown	Tb927.09.08650	-	NA	332	-0.0831	0.625	0.029	1	0.0177	0.999	0.77	0.5753	0	0	0	0	1.4481	-0.1776	0.721	0.0004	0.93	-0.1047
Tb927.11.16960	hypothetical protein, conserved	ZUnknown	Tb927.11.16960	-	NA	1953	-0.2277	0.000352	-0.1423	1	-0.079	0.999	0.85	0.5753	0	0	0	0	1.6109	0.3772	0.049	0.7699	0.81	-0.304
Tb927.11.3670	hypothetical protein, conserved	ZUnknown	Tb927.11.03670	+	NA	1202	-0.0072	0.94	-0.1881	0.997437	-0.1913	0.966	1.18	0.5721	0	0	0	0	-0.7067	-0.1195	0.108	0.0984	1.13	0.1763
Tb927.10.11820	kinetoplast ribosomal PPR-repeat containing protein 17	Mito.translation	Tb927.10.11820	+	1599	736	0.1291	0.249	0.1061	1	0.0396	0.999	1.31	0.5721	0	0	0	0	-0.6467	-0.0437	0.127	-0.1155	1.02	0.0286
Tb927.5.1740	hypothetical protein	ZUnknown	Tb927.05.1740	+	685	1195	-0.465	1.82e-06	-0.1303	1	-0.1723	0.999	1	0.5721	0	0	0	0	1.5003	-0.536	-1.264	0.5852	1	0
Tb927.5.2470	hypothetical protein, conserved	ZUnknown	Tb927.05.2470	+	1401	1163	-0.216	0.00487	0.088	1	0.0538	0.999	1.03	0.5721	0	0	0	0	1.5661	0.5631	-0.027	0.7615	0.99	-0.0145
Tb927.3.3140	hypothetical protein, conserved	ZUnknown	Tb927.03.3140	-	1019	479	0.0947	0.441	-0.0392	1	-0.0375	0.999	1.04	0.5721	0	0	0	0	-0.0629	0.1368	0.319	-0.1029	0.86	-0.2176
Tb927.5.1250	GAF domain/TIP41-like family, putative	ZUnknown	Tb927.05.1250	+	2513	2471	0.1865	0.000757	0.0137	1	0.0044	0.999	1.23	0.5688	0	0	0	0	0.1485	0.1305	0.229	-0.5549	1.11	0.1506
Tb927.9.11720	iron-sulfur cluster assembly protein ISCU	Mito.pathway	Tb927.09.11720	+	NA	2087	0.2095	0.002	0.278	0.710097	0.26	0.169	1.12	0.5688	0	0	0	0	0.4048	0.0861	-0.2	0.4904	1.09	0.1243
Tb927.7.2520	Uncharacterised protein family UPF0066, putative	ZUnknown	Tb927.07.2520	-	1902	708	-0.3034	0.000851	-0.5321	0.219484	-0.5331	0.208	1.06	0.5688	0	0	0	0	-0.569	0.03	0.932	0.2964	1.08	0.111
Tb927.11.4890	MT48 or MTr2 or Com1 cap methyltransferase	RNA.processing	Tb927.11.04890	+	NA	1043	0.1227	0.163	0.0497	1	0.0623	0.999	1.3	0.5688	0	0	0	0	0.3962	-0.0547	0.4	0.2297	1.06	0.0841
Tb927.4.3480	hypothetical protein	ZUnknown	Tb927.04.3480	-	1243	1182	0.0186	0.865	0.0404	1	0.0603	0.999	1	0.5688	0	0	0	0	1.7368	-0.2024	-0.481	1.8262	1	0
Tb927.10.5530	hypothetical protein, conserved	ZUnknown	Tb927.10.05530	+	2697	1363	-0.1201	0.101	-0.1397	1	-0.1386	0.742	1.16	0.5656	0	0	0	0	0.2959	0.0051	0.705	0.0224	1.08	0.111
Tb927.5.1270	hypothetical protein, conserved	ZUnknown	Tb927.05.1270	+	1000	591	-0.1387	0.207	0.1483	1	0.1223	0.999	1.38	0.5656	0	0	0	0	0.9055	-0.048	0.397	-0.0921	1.03	0.0426
Tb927.7.6920	hypothetical protein, conserved	ZUnknown	Tb927.07.6920	-	3215	1093	-0.0017	0.987	0.1635	1	0.159	0.999	1.41	0.5656	0	0	0	0	0.3123	0.4612	-0.342	-1.2485	1	0
Tb927.7.6630	KKIP5 Kinetochore interacting protein 5	Cell.cycle	Tb927.07.6630	-	4598	2664	0.2812	7.94e-07	0.8057	0.138479	0.7673	0.0141	0.81	0.5623	0	0	0	0	0.4791	0.1554	-0.799	-0.4385	1.07	0.0976
Tb927.8.8290	AAT10 Ornithine transporter	Amino.acid.transport	Tb927.08.8290	+	NA	2882	-1.5161	3.83e-120	0.1082	1	0.1499	0.999	0.98	0.5623	1	0	0	0	#N/A	#N/A	0.208	-0.1532	1.01	0.0144
Tb927.5.800	CK1.2 casein kinase 1	Protein.kinase	Tb927.05.0800	+	NA	6495	0.0672	0.336	-0.1098	1	-0.0998	0.999	0.56	0.5623	0	0	0	0	#N/A	#N/A	-0.602	0.57	0.98	-0.0291
Tb927.10.2550	malate dehydrogenase-related	Mito.e.transport	Tb927.10.02550	+	1542	565	0.0635	0.58	-0.1242	1	-0.1802	0.967	1.2	0.5623	0	0	0	0	-1.112	0.1954	0.03	-0.6768	0.8	-0.3219
Tb927.10.6520	hypothetical protein, conserved	ZUnknown	Tb927.10.06520	+	1794	933	0.0742	0.433	0.1844	1	0.181	0.999	1.08	0.5591	0	0	0	0	-0.5141	0.005	-0.219	-0.6902	1.09	0.1243
Tb927.3.650	hypothetical protein, conserved	ZUnknown	Tb927.03.0650	-	472	240	0.0802	0.643	0.2892	1	0.2237	0.999	0.92	0.5591	0	0	0	0	0.6668	-0.3952	-0.04	1.2328	1.06	0.0841
Tb927.11.9630	vesicle protein SN7 family protein.	Vesicular.transport	Tb927.11.09630	-	NA	1001	-0.0325	0.736	0.0671	1	0.0258	0.999	1.29	0.5591	0	0	0	0	-0.4038	0.027	-0.586	0.496	1.05	0.0704
Tb927.10.14260	adaptin complex AP4 sigma subunit	Vesicular.transport	Tb927.10.14260	-	1275	801	-0.0382	0.702	-0.3235	0.481778	-0.3369	0.146	1.04	0.5591	0	0	0	0	-0.6868	-0.4041	0.701	-0.5127	1.01	0.0144
Tb927.9.2050	membrane protein YIP1, putative	Vesicular.transport	Tb927.09.02050	-	NA	1230	0.1577	0.0277	0.0619	1	0.0549	0.999	1.12	0.5591	0	0	0	0	1.0981	0.4017	0.314	0.5982	0.98	-0.0291
Tb927.11.16560	CMP-sialic acid transporter, putative	Glycans	Tb927.11.16560	-	NA	2348	0.2688	8.23e-06	0.2608	1	0.2983	0.866	1.44	0.5591	0	0	0	0	1.0515	0.3583	0.404	0.8673	0.97	-0.0439
Tb927.8.1570	Uncharacterised protein family (UPF0172), putative	ZUnknown	Tb927.08.1570	+	1866	1584	-0.0984	0.204	0.0261	1	0.0294	0.999	0.9	0.5558	0	0	0	0	0.6018	-0.022	-0.049	-0.2642	1.14	0.189
Tb927.7.3540	hypothetical protein, conserved	ZUnknown	Tb927.07.3540	-	1974	1241	0.2738	0.00022	0.3665	0.502615	0.1941	0.814	1.18	0.5558	0	0	0	0	1.2178	-0.167	0.105	0.5631	1.08	0.111
Tb927.11.6160	ERF3 eukaryotic release factor 3, putative	Translation	Tb927.11.06160	-	NA	2826	-0.8193	1.49e-50	-0.2807	1	-0.2975	0.843	1.16	0.5558	1	0	0	0	0.0163	0.1844	1.019	-0.871	1.02	0.0286
Tb927.11.10050	LSU ribosomal protein, mitochondrial, putative	Mito.translation	Tb927.11.10050	+	NA	433	0.1114	0.413	-0.1127	1	-0.138	0.999	1.12	0.5558	0	0	0	0	-1.581	0.1338	0.045	-0.9759	0.98	-0.0291
Tb927.11.7330	hypothetical protein, conserved	ZUnknown	Tb927.11.07330	+	NA	714	0.2585	0.00404	-0.0438	1	-0.0609	0.999	1.07	0.5525	0	0	0	0	-1.8472	-0.1779	0.182	-0.8623	1.18	0.2388
Tb927.8.3730	COPI associated protein, putative	ZUnknown	Tb927.08.3730	-	1121	690	-0.8262	7.22e-17	-0.7135	0.115818	-0.7026	0.0186	0.66	0.5525	1	0	0	0	1.0918	-0.2539	0.068	2.522	0.99	-0.0145
Tb927.7.6800	LSU ribosomal protein, mitochondrial, putative	Mito.translation	Tb927.07.6800	-	1631	721	0.6063	6.08e-12	-0.1344	1	-0.1571	0.999	1.01	0.5525	0	1	0	0	-2.3338	0.3857	0.872	-1.0582	0.95	-0.074
Tb927.6.3960	Triose-phosphate Transporter family, putative	ZUnknown	Tb927.06.3960	-	2457	1445	0.0856	0.333	-0.3327	0.834488	-0.3244	0.0275	0.93	0.5493	0	0	0	0	0.2114	-0.0191	-0.332	0.7039	1.35	0.433
Tb927.2.5970	hypothetical protein, conserved	ZUnknown	Tb927.02.5970	+	1877	2149	0.2025	0.0015	-0.0022	1	-0.0178	0.999	1.36	0.5493	0	0	0	0	-0.6862	-0.0166	-0.532	-0.2355	1.25	0.3219
Tb927.5.1470	NADH-cytochrome b5 reductase, putative (B5R)	Mito.e.transport	Tb927.05.1470	-	964	1320	0.3465	8.83e-07	-0.0809	1	-0.1083	0.999	1	0.5493	0	0	0	0	0.4171	0.3961	0.407	-0.1381	1.19	0.251
Tb927.3.1390	LMBR1-like membrane protein, putative	ZUnknown	Tb927.03.1390	+	3026	1834	0.0658	0.401	0.1214	1	0.1334	0.913	1.09	0.5493	0	0	0	0	0.7417	0.0864	-0.071	0.7021	1.13	0.1763
Tb927.11.10250	hypothetical protein, conserved	ZUnknown	Tb927.11.10250	+	NA	480	0.335	0.00108	0.0814	1	0.0871	0.999	0.97	0.5493	0	0	0	0	0.3309	-0.4203	0.271	-0.0697	1.12	0.1635
Tb927.10.3480	hypothetical protein, conserved	ZUnknown	Tb927.10.03480	+	2427	1788	0.0083	0.925	-0.1247	1	-0.1298	0.767	1.31	0.5493	0	0	0	0	0.3795	0.0257	0.139	0.7399	1.04	0.0566
Tb927.11.6260	hypothetical protein, conserved	ZUnknown	Tb927.11.06260	-	NA	2425	0.2107	0.000845	0.0133	1	0.0172	0.999	1.02	0.5493	0	0	0	0	0.872	0.2479	0.235	0.7193	1.04	0.0566
Tb927.3.4940	5-histidylcysteine sulfoxide synthase, 1st step ovothiol s/s	Redox	Tb927.03.4940	+	3568	1687	0.0506	0.503	0.1499	1	0.2369	0.427	0.92	0.5493	0	0	0	0	0.3254	0.9555	0.321	-0.4407	0.89	-0.1681
Tb927.11.5240	Methyltransferase TRM13, putative	ZUnknown	Tb927.11.05240	+	NA	999	-0.0108	0.919	-0.0923	1	-0.0926	0.999	0.86	0.546	0	0	0	0	-0.5648	-0.1285	0.304	-0.2064	1.07	0.0976
Tb927.7.3680	40S ribosomal protein S27+ ubiquitin	Ribosome	Tb927.07.3680	-	NA	10478	-0.0307	0.553	-0.2949	0.823522	-0.3022	0.925	0.73	0.546	0	0	0	0	#N/A	#N/A	0.611	-0.7695	1.04	0.0566
Tb927.4.2730	Kinesin, kinesin-12	Cytoskeleton	Tb927.04.2730	+	3752	2052	-0.2977	1.88e-07	0.1547	1	0.1239	0.999	1.24	0.546	0	0	0	0	1.6747	0.5611	0.001	1.2811	0.85	-0.2345
Tb927.9.2030	AAA ATPase domain containing protein, putative	ZUnknown	Tb927.09.02030	-	NA	1093	-0.0502	0.585	0.096	1	0.1272	0.999	1.03	0.5427	0	0	0	0	0.1807	-0.022	-0.326	-0.6162	1.14	0.189
Tb927.9.9690	Flagellar tip protein	Cytoskeleton	Tb927.09.09690	-	NA	547	-0.0194	0.884	-0.0239	1	-0.0371	0.999	1.16	0.5427	0	0	0	0	-0.7734	0.1257	0.071	0.3086	1.07	0.0976
Tb927.11.15330	phosphatidylinositol 3-kinase catalytic subunit, putative	Signalling	Tb927.11.15330	-	NA	2278	0.3428	2.95e-10	0.1396	1	0.0923	0.999	0.77	0.5427	0	0	0	0	1.353	0.775	0.046	1.5416	1.02	0.0286
Tb927.3.720	ZFP3	RNA.binding	Tb927.03.0720	-	1148	3828	0.021	0.766	0.0889	1	0.081	0.999	0.41	0.5427	0	0	0	0	-0.4771	-0.3208	-0.484	-0.437	1	0
Tb927.11.170	hypothetical protein, conserved	ZUnknown	Tb927.11.00170	-	NA	1545	0.2323	0.000593	0.0115	1	0.0261	0.999	1	0.5394	0	0	0	0	-0.5113	-0.0248	0.12	0.1343	1.32	0.4005
Tb927.1.2120	calpain, putative,cysteine peptidase, Clan CA, family C2, putative	Protease	Tb927.01.2120	+	2553	3242	-0.5295	1.01e-22	0.2901	0.857384	0.2389	0.991	0.9	0.5394	0	0	0	0	0.4474	0.8058	-0.285	0.2762	1.31	0.3896
Tb927.9.9260	hypothetical protein, conserved	ZUnknown	Tb927.09.09260	-	NA	901	-0.7861	1.47e-23	-1.0393	0.0564638	-1.0426	0.0274	0.64	0.5394	1	0	0	0	-0.2981	-0.0047	0.634	-0.3082	0.99	-0.0145
Tb927.10.12640	chaperone DNAj, putative, J37	Chaperone	Tb927.10.12640	-	3413	1695	-0.244	0.000104	-0.0562	1	-0.0644	0.999	1.33	0.5361	0	0	0	0	0.4084	0.0809	-0.268	0.2636	1.03	0.0426
Tb927.1.4140	Protein of unknown function (DUF1448), putative	ZUnknown	Tb927.01.4140	+	1110	772	-0.0965	0.32	0.0016	1	0.0511	0.999	0.96	0.5361	0	0	0	0	-0.8252	-0.1302	0.112	0.3918	1.03	0.0426
Tb927.4.1390	hypothetical protein, conserved	ZUnknown	Tb927.04.1390	-	3967	3723	1.0921	8.66e-120	1.183	0.000748938	1.0161	1.77e-07	0.82	0.5327	0	1	0	1	0.1094	0.9201	0.337	0.4742	1.57	0.6508
Tb927.9.10790	hypothetical protein, trypanosoma-specific	ZUnknown	Tb927.09.10790	-	NA	1556	0.1319	0.0728	0.4854	0.837227	0.4066	0.77	1.24	0.5327	0	0	0	0	-0.0945	0.2655	-0.025	-0.5971	1.34	0.4222
Tb927.3.4670	CRK10 cdc2- like protein kinase	Protein.kinase	Tb927.03.4670	-	2458	1601	0.1511	0.0394	0.6506	0.559523	0.5592	0.552	1.38	0.5327	0	0	0	0	1.2892	0.6789	-0.022	1.1807	1.18	0.2388
Tb927.8.8010	hypothetical protein, conserved	ZUnknown	Tb927.08.8010	+	2401	1168	-1.1926	3.57e-62	-0.1061	1	-0.119	0.956	0.74	0.5327	1	0	0	0	-0.0893	-0.0639	0.074	0.0021	1.05	0.0704
Tb927.3.2160	Rieske-like [2Fe-2S] domain containing protein, putative	ZUnknown	Tb927.03.2160	-	1751	1080	0.2981	0.000187	0.059	1	0.0644	0.999	1.1	0.5327	0	0	0	0	-0.226	-0.0794	0.349	0.2416	0.98	-0.0291
Tb927.11.3020	hypothetical protein, conserved	ZUnknown	Tb927.11.03020	-	NA	1926	0.0456	0.534	0.069	1	0.0648	0.999	1.25	0.5327	0	0	0	0	-0.0699	0.3605	0.157	0.0816	0.96	-0.0589
Tb927.11.8320	hypothetical protein, conserved	ZUnknown	Tb927.11.08320	+	NA	1140	0.3264	1.2e-05	0.2472	0.459169	0.2692	0.238	1.25	0.5327	0	0	0	0	0.4257	-0.0194	-0.025	0.0296	0.92	-0.1203
Tb927.11.8090	protein phosphatase 1, putative	Protein.phosphatase	Tb927.11.08090	+	NA	1576	-0.4818	2.35e-13	0.2696	1	-0.0446	0.999	1.24	0.5294	0	0	0	0	1.2081	0.757	0.266	-0.0811	1.31	0.3896
Tb927.11.8900	DPCD protein family, putative	ZUnknown	Tb927.11.08900	+	NA	577	0.2479	0.0116	0.0454	1	0.046	0.999	1.31	0.5294	0	0	0	0	0.2076	-0.196	0.036	0.3345	1.03	0.0426
Tb927.11.14840	CPC2, chromosomal passenger complex	Chromatin	Tb927.11.14840	-	NA	3181	-0.5656	2.11e-25	-0.5366	0.44841	-0.5407	0.281	0.69	0.5294	0	0	0	0	0.9466	-2.2262	-3.366	-2.3928	1.01	0.0144
Tb927.8.1110	40S ribosomal protein S9 190aa, 22KDa	Ribosome	Tb927.08.1110	-	NA	20085	-0.0782	0.0738	-0.2932	0.642466	-0.3107	0.875	0.88	0.5294	0	0	0	0	#N/A	#N/A	0.79	-0.8953	0.97	-0.0439
Tb927.10.5880	Proteophosphoglycan, putative	ZUnknown	Tb927.10.05880	-	2751	3682	0.8157	1.44e-65	1.2179	0.0186026	0.9273	0.0963	1.08	0.5261	0	1	0	1	-0.3196	0.051	-0.392	-0.4753	1.42	0.5059
Tb927.6.2790	L-threonine 3-dehydrogenase, putative	Mito.pathway	Tb927.06.2790	+	1998	4752	-0.2304	2.16e-06	-0.1367	1	-0.1929	0.993	0.97	0.5261	0	0	0	0	-2.5492	0.3071	0.118	-1.7062	1.23	0.2987
Tb927.10.14800	MAPK9 protein kinase	Protein.kinase	Tb927.10.14800	-	2497	1258	0.0845	0.26	0.5241	0.377105	0.4757	0.216	0.98	0.5261	0	0	0	0	0.6158	0.5359	-0.054	0.4212	1.08	0.111
Tb927.5.3420	ABC1 family, putative	ZUnknown	Tb927.05.3420	-	1995	1247	0.0909	0.248	-0.0269	1	0.0524	0.999	1.31	0.5261	0	0	0	0	0.5305	0.3884	0.267	0.2601	1.05	0.0704
Tb927.5.2040	hypothetical protein, conserved	ZUnknown	Tb927.05.2040	-	1115	822	0.012	0.921	0.1445	1	0.1452	0.999	0.99	0.5261	0	0	0	0	0.441	-0.0266	0.055	0.0787	0.91	-0.1361
Tb927.6.3200	hypothetical protein, conserved	ZUnknown	Tb927.06.3200	+	360	228	0.1242	0.469	-0.021	1	0.0403	0.999	0.95	0.5227	0	0	0	0	0.1886	-0.2196	0.376	0.1711	0.79	-0.3401
Tb927.2.3730	hypothetical protein, conserved	ZUnknown	Tb927.02.3730	-	1764	1288	-0.1712	0.0174	0.0306	1	0.0368	0.999	1.16	0.5194	0	0	0	0	0.0374	0.0512	-0.318	0.4807	1.1	0.1375
Tb927.10.4220	hypothetical protein, conserved	ZUnknown	Tb927.10.04220	+	1000	860	0.1037	0.246	-0.0302	1	-0.036	0.999	1.18	0.5194	0	0	0	0	0.079	0.2477	0.36	0.0102	0.96	-0.0589
Tb927.3.600	hypothetical protein	ZUnknown	Tb927.03.0600	-	5013	850	0.1548	0.132	-1.0303	0.214666	-0.6859	0.16	0.75	0.5194	0	0	0	0	1.8901	0.4561	0.149	6.1512	0.9	-0.152
Tb927.9.8740	DRBD3 (PTB1)	RNA.binding	Tb927.09.08740	-	NA	5221	-0.2755	7.29e-08	0.0435	1	-0.1185	0.999	0.66	0.516	0	0	0	0	0.5729	0.4181	-0.275	-0.8	1.22	0.2869
Tb927.8.3770	MAPK protein kinase	Protein.kinase	Tb927.08.3770	-	2496	3597	0.1962	6.43e-05	0.4518	0.419108	0.3511	0.691	1.21	0.516	0	0	0	0	0.4973	1.3776	0.584	1.2727	1.2	0.263
Tb927.6.2810	ABC transporter, putative	Transporter	Tb927.06.2810	+	1610	1082	0.3505	1.82e-05	-0.1861	0.816217	-0.1782	0.861	0.97	0.516	0	0	0	0	-0.9664	-0.3343	0.169	-0.3422	1.17	0.2265
Tb927.10.730	ATP synthase, putative	Mito.e.transport	Tb927.10.00730	+	2959	2297	-0.0618	0.419	0.1012	1	0.0041	0.999	1.34	0.516	0	0	0	0	0.483	-0.2676	-0.437	0.5948	1.08	0.111
Tb927.8.6360	SPRY domain containing protein, putative	ZUnknown	Tb927.08.6360	+	2853	2632	-0.2018	0.0041	-0.2189	1	-0.2201	0.879	0.98	0.516	0	0	0	0	0.5948	0.5071	0.314	0.8523	1.06	0.0841
Tb927.10.5230	ARL13b	Vesicular.transport	Tb927.10.05230	+	1456	1507	0.0861	0.31	0.0006	1	-0.0451	0.999	1.27	0.516	0	0	0	0	-0.5251	-0.1615	0.122	0.0379	1.01	0.0144
Tb927.8.590	carnitine O-palmitoyltransferase, putative	Lipids	Tb927.08.0590	-	3250	1354	-0.6602	2.93e-19	-0.5094	0.467665	-0.5149	0.000193	1.08	0.5126	1	0	0	0	1.1144	0.0252	0.17	-0.2195	1.09	0.1243
Tb927.11.2970	hypothetical protein, conserved	ZUnknown	Tb927.11.02970	-	NA	1718	-0.0049	0.954	-0.0098	1	0.0018	0.999	1.09	0.5126	0	0	0	0	0.2517	0.0727	0.105	0.5974	1.01	0.0144
Tb927.11.13890	RNA ligase asociated with SSU	Mito.pathway	Tb927.11.13890	+	NA	606	0.4803	2.3e-07	-0.0897	1	-0.1018	0.999	0.91	0.5126	0	0	0	0	-1.0355	0.0746	0.673	-0.5077	1.01	0.0144
Tb927.4.350	hypothetical protein, conserved	ZUnknown	Tb927.04.0350	-	2115	840	-0.2373	0.0042	-0.465	0.734174	-0.4963	0.133	0.91	0.5126	0	0	0	0	-0.1884	0.0207	0.286	0.0156	0.99	-0.0145
Tb927.3.1990	Tetratricopeptide repeat, putative	ZUnknown	Tb927.03.1990	-	2276	1504	0.0778	0.313	0.2435	1	0.2125	0.809	0.97	0.5093	0	0	0	0	-0.0437	-0.1781	-0.5	0.0641	1.4	0.4854
Tb927.10.1350	hypothetical protein, conserved	ZUnknown	Tb927.10.01350	-	2870	2318	-0.2128	0.000126	0.0843	1	0.0758	0.999	1.4	0.5093	0	0	0	0	0.1191	0.1318	-0.176	-0.4183	1.15	0.2016
Tb927.4.3040	ESP11 Enriched in surface-labeled proteome	Membrane.protein	Tb927.04.3040	+	3558	638	-0.6215	2.78e-11	-0.1212	1	-0.0136	0.999	1.1	0.5093	1	0	0	0	0.44	0.0237	-0.602	0.8622	1.09	0.1243
Tb927.1.1920	conserved protein, unknown function	ZUnknown	Tb927.01.1920	+	2678	759	-0.4874	2.54e-07	0.4119	0.93723	0.4798	0.0239	1.04	0.5093	0	0	0	0	1.0466	0.1741	-0.436	0.0833	1.02	0.0286
Tb927.3.3050	hypothetical protein, conserved	ZUnknown	Tb927.03.3050	-	3222	1668	0.0449	0.554	-0.1878	0.918341	-0.1904	0.515	0.67	0.5093	0	0	0	0	0.1733	0.342	0.437	0.1411	1.02	0.0286
Tb927.6.2510	Flavinator of succinate dehydrogenase, putative	Mito.pathway	Tb927.06.2510	+	1289	851	-0.1892	0.0258	0.0726	1	0.0804	0.999	0.53	0.5093	0	0	0	0	-0.9388	-0.5009	-0.528	-1.6188	1.02	0.0286
Tb927.1.3180	40S ribosomal protein S11	Ribosome	Tb927.01.3180	+	NA	15662	0.0148	0.831	-0.2115	0.805629	-0.2318	0.995	0.64	0.5093	0	0	0	0	#N/A	#N/A	0.647	-0.8034	1	0
Tb927.11.11680	2-oxoglutarate dehydrogenase E2 component, putative	Mito.citric.acid.cycle	Tb927.11.11680	+	NA	3474	-0.3735	1.14e-11	0.3035	1	0.3061	0.914	1.04	0.5093	0	0	0	0	-2.4322	1.7947	1.171	-2.3903	0.99	-0.0145
Tb927.5.4410	hypothetical protein, conserved, Rrp15 like domain, required for 60s ribosomal subunit formation	rRNA.tRNA.process	Tb927.05.4410	-	783	853	0.0376	0.746	0.0895	1	0.0688	0.999	0.72	0.5093	0	0	0	0	-0.5807	-0.2686	0.031	-0.1768	0.9	-0.152
Tb927.3.3080	NEK6 protein kinase	Protein.kinase	Tb927.03.3080	-	1986	1275	-0.0216	0.81	0.0175	1	0.0237	0.999	1.11	0.5059	0	0	0	0	0.5874	-0.4821	-0.364	0.1386	1.1	0.1375
Tb927.7.3360	Farnesyl-pyrophosphate synthase	Prenylation	Tb927.07.3360	-	1922	1152	0.2867	4.79e-05	-0.0195	1	-0.0441	0.999	1.08	0.5059	0	0	0	0	-0.8398	0.3543	-0.422	-0.9015	1.03	0.0426
Tb927.10.9690	predicted C2 domain protein	ZUnknown	Tb927.10.09690	+	6442	3429	0.0977	0.0934	-0.2351	1	-0.212	0.947	0.72	0.5059	0	0	0	0	1.0094	1.2879	0.547	-0.0433	1.02	0.0286
Tb927.11.14260	atypical dual specificity phosphatase, putative	Phosphatase	Tb927.11.14260	+	NA	643	0.071	0.52	0.0836	1	0.0616	0.999	1.27	0.5059	0	0	0	0	-0.3334	0.0245	0.192	0.5941	0.99	-0.0145
Tb927.5.2280	Histone acetyltransferase HAT5	Lipids	Tb927.05.2280	+	1593	1318	-0.1585	0.0317	-0.2907	0.391251	-0.2921	0.251	1.12	0.5059	0	0	0	0	-0.1944	-0.1824	-0.229	-0.5814	0.99	-0.0145
Tb927.10.8560	small GTPase, putative (RAB23)	Vesicular.transport	Tb927.10.08560	+	681	647	-0.1018	0.315	-0.1872	0.832724	-0.1496	0.842	1.26	0.5059	0	0	0	0	-0.6703	-0.1029	0.188	-0.0674	0.96	-0.0589
Tb927.10.3120	cytochrome c oxidase assembly protein, putative	Mito.e.transport	Tb927.10.03120	+	1041	678	0.3257	0.00075	-0.0253	1	-0.0171	0.999	1.07	0.5025	0	0	0	0	-1.2299	0.1866	0.1	-1.3563	1.04	0.0566
Tb927.10.11040	hypothetical protein, conserved	ZUnknown	Tb927.10.11040	-	2768	1294	0.013	0.884	-0.0296	1	-0.0299	0.999	0.84	0.5025	0	0	0	0	-0.2675	0.2262	0.917	-0.0745	1.02	0.0286
Tb927.7.4180	Elongase 3	Lipids	Tb927.07.4180	+	2756	5431	0.8291	4.9e-49	0.3639	0.619791	0.3262	0.737	0.95	0.4991	0	1	0	0	-0.8958	-0.0011	-0.27	-1.0627	1.48	0.5656
Tb927.10.15960	hypothetical protein, conserved	ZUnknown	Tb927.10.15960	+	1453	976	-0.3088	3.79e-05	0.558	0.0293309	0.5532	0.00638	1.25	0.4991	0	0	0	0	0.0379	-0.0114	-1.374	0.3778	1.14	0.189
Tb927.10.12180	hypothetical protein, conserved	ZUnknown	Tb927.10.12180	+	2149	1493	0.176	0.00743	0.525	0.374944	0.517	0.0308	1.15	0.4991	0	0	0	0	0.2187	-0.1008	-0.544	-0.2151	1.14	0.189
Tb927.1.1310	transmembrane protein, conserved	ZUnknown	Tb927.01.1310	+	1336	1213	0.1263	0.145	-0.0601	1	-0.165	0.984	1.12	0.4957	0	0	0	0	-0.6761	-0.0335	0.248	-0.5995	1.16	0.2141
Tb927.5.1620	hypothetical protein, conserved	ZUnknown	Tb927.05.1620	+	1204	900	-0.13	0.208	-0.1388	1	-0.122	0.999	0.92	0.4957	0	0	0	0	0.2465	0.0987	0.214	0.2793	1.09	0.1243
Tb927.2.5530	POMP22	Mito.membrane	Tb927.02.5530	-	6316	5670	0.1421	0.00958	0.456	0.832901	0.3452	0.506	0.47	0.4957	0	0	0	0	1.1639	1.2569	0.732	0.7413	1.04	0.0566
Tb927.8.1280	hypothetical protein, conserved	ZUnknown	Tb927.08.1280	-	4713	4457	-0.3299	3.09e-11	1.0061	0.0447417	0.9641	0.00433	0.74	0.4923	0	0	0	1	1.5453	0.8284	-0.252	0.79	1.3	0.3785
Tb927.7.5410	hypothetical protein, conserved	ZUnknown	Tb927.07.5410	+	3083	5218	-0.268	5.42e-08	0.1546	1	0.2449	0.486	0.98	0.4923	0	0	0	0	1.5924	-0.147	-0.673	0.423	1.14	0.189
Tb927.2.2160	paraflagellar rod protein PFC11	Cytoskeleton	Tb927.02.2160	-	2062	2926	0.2411	1.14e-05	0.1574	1	0.1455	0.999	0.97	0.4923	0	0	0	0	0.0373	-0.6767	-0.949	-0.3652	1.09	0.1243
Tb927.11.6480	FHA domain containing protein, putative	ZUnknown	Tb927.11.06480	-	NA	1272	0.2865	2.26e-05	0.0304	1	0.0132	0.999	0.87	0.4923	0	0	0	0	-0.3824	0.3558	0.457	0.4624	1.08	0.111
Tb927.8.8160	hypothetical protein, conserved	ZUnknown	Tb927.08.8160	+	4039	1744	-0.9695	2.83e-51	-0.1474	1	-0.135	0.999	0.74	0.4889	1	0	0	0	0.6178	-0.14	0.375	0.5443	1.12	0.1635
Tb927.6.4070	hypothetical protein, conserved	Mito.pathway	Tb927.06.4070	-	1008	1109	0.0033	0.972	-0.4275	0.147335	-0.4381	0.0535	0.84	0.4889	0	0	0	0	-1.4265	-0.3939	-0.133	-0.5267	1.04	0.0566
Tb927.7.4910	hypothetical protein, conserved, no yeast or human match	ZUnknown	Tb927.07.4910	-	1751	3048	-0.1152	0.0678	0.1524	1	0.1595	0.821	0.81	0.4889	0	0	0	0	-0.3254	-0.6567	-1.071	-0.4349	1.01	0.0144
Tb927.11.14800	hypothetical protein, conserved, no domains, no yeast or human match	ZUnknown	Tb927.11.14800	-	NA	1197	-0.0204	0.818	0.1322	1	0.129	0.996	0.98	0.4889	0	0	0	0	0.2751	-0.0891	-0.538	-0.1739	1	0
Tb927.9.2780	hypothetical protein, conserved	ZUnknown	Tb927.09.02780	-	NA	966	0.0459	0.636	0.0298	1	0.0005	1	1.01	0.4889	0	0	0	0	-0.9899	-0.2815	0.113	0.1108	0.99	-0.0145
Tb927.7.3060	TAC42 component of tripartite attachment complex	Mito.biogenesis	Tb927.07.3060	+	1641	1123	0.2037	0.00716	-0.0834	1	-0.0819	0.999	1.11	0.4889	0	0	0	0	-0.4124	0.0884	0.667	-0.4335	0.96	-0.0589
Tb927.11.8310	class I transcription factor A, subunit 4 (CITFA-4)	RNA.synthesis	Tb927.11.08310	+	NA	2669	0.2232	0.000108	0.9487	0.0939455	0.7561	0.197	0.84	0.4854	0	0	0	0	0.5578	-0.3119	0.08	0.1944	1.57	0.6508
Tb927.6.5100	serine/threonine-protein kinase, putative	Protein.kinase	Tb927.06.5100	+	4000	2665	0.4309	1.2e-15	0.3549	0.613244	0.2646	0.555	0.98	0.4854	0	0	0	0	-0.8824	0.2753	0.403	-0.4682	1.46	0.546
Tb927.6.640	ALPH1 decapping enzyme	RNA.degradation	Tb927.06.0640	-	5214	4354	-0.2835	2.37e-08	1.0033	0.0113826	1.1759	0.00698	0.83	0.4854	0	0	0	1	0.825	0.7546	-0.502	0.2454	1.11	0.1506
Tb927.11.1660	vesicular transport protein (CDC48 homologue), putative	Vesicular.transport	Tb927.11.01660	-	NA	2145	-0.1375	0.0272	0.0491	1	0.0203	0.999	0.68	0.4854	0	0	0	0	0.5733	0.3026	0.628	-0.1474	1.07	0.0976
Tb927.2.5950	hypothetical protein, conserved	ZUnknown	Tb927.02.5950	+	1782	2026	-0.147	0.0193	0.0235	1	0.0078	0.999	1.07	0.4854	0	0	0	0	0.2665	-0.3283	-0.696	0.2252	0.99	-0.0145
Tb927.5.1700	Kinesin-2, also "replication Factor A 28 kDa subunit, or RPA1-2	DNA	Tb927.05.1700	+	2304	1634	0.3318	3.8e-07	0.1661	1	0.082	0.999	1.04	0.482	0	0	0	0	-0.1426	0.2872	-0.408	-0.2836	1.53	0.6135
Tb927.8.1800	Eukaryotic membrane protein family, putative	ZUnknown	Tb927.08.1800	-	1969	1198	0.0719	0.423	-0.1116	1	-0.0933	0.999	1.06	0.482	0	0	0	0	0.1046	-0.3059	0.539	-0.2169	1.24	0.3103
Tb927.6.3990	hypothetical protein, conserved	ZUnknown	Tb927.06.3990	-	3921	2105	-0.2674	1.93e-05	-0.0932	1	-0.1394	0.999	0.99	0.482	0	0	0	0	0.777	0.4636	0.074	0.3996	1.16	0.2141
Tb927.1.1610	hypothetical protein, conserved	Mito.pathway	Tb927.01.1610	+	1671	736	-0.2674	0.00682	0.02	1	0.0228	0.999	1.11	0.482	0	0	0	0	0.3222	-0.269	0.334	-0.1103	1.04	0.0566
Tb927.7.1680	Uncharacterised conserved protein (DUF2305), putative	ZUnknown	Tb927.07.1680	+	1325	836	0.3015	0.000565	0.1628	0.868744	0.127	0.87	1.36	0.482	0	0	0	0	0.3713	-0.3807	0.256	0.1925	1.03	0.0426
Tb927.10.15490	GDP-mannose 4,6 dehydratase, GMD	Glycans	Tb927.10.15490	+	1929	1322	-0.4845	1.3e-12	-0.3916	0.840947	-0.435	0.193	1.3	0.482	0	0	0	0	0.2645	-0.1475	0.454	-0.3281	0.99	-0.0145
Tb927.11.9500	hypothetical protein, conserved	ZUnknown	Tb927.11.09500	-	NA	487	-0.0434	0.74	0.021	1	0.0698	0.999	1.1	0.482	0	0	0	0	-0.0783	-0.5665	-0.005	0.1698	0.97	-0.0439
Tb927.10.4000	methylglutaconyl-CoA hydratase, mitochondrial precursor, putative	Amino.acids	Tb927.10.04000	-	1260	1050	-0.226	0.00544	-0.0184	1	-0.0488	0.999	0.81	0.482	0	0	0	0	-1.6569	-0.1839	0.286	-0.846	0.96	-0.0589
Tb927.9.2940	hypothetical protein, conserved	ZUnknown	Tb927.09.02940	-	NA	2129	0.072	0.252	0.8426	0.00340875	0.7444	8.63e-05	0.99	0.4785	0	0	0	1	0.2225	0.2664	-0.235	-0.2631	1.3	0.3785
Tb927.5.3500	SET16	ZUnknown	Tb927.05.3500	-	4429	1418	0.0754	0.367	-0.0426	1	-0.059	0.999	0.94	0.4785	0	0	0	0	0.3674	-0.2604	0.494	-0.2719	1.09	0.1243
Tb927.4.2230	dolichyl-P-Man:GDP-Man1GlcNAc2-PP-dolichyl alpha-1,3-mannosyltransferase, putative	Glycans	Tb927.04.2230	+	1550	1645	0.0835	0.241	0.0207	1	0.0097	0.999	0.96	0.4785	0	0	0	0	0.5327	-0.1577	-0.034	0.3201	0.97	-0.0439
Tb927.4.4170	rRNA methyltransferase, putative	rRNA.tRNA.process	Tb927.04.4170	-	937	438	-0.1134	0.407	0.1016	1	0.0907	0.999	1.03	0.4785	0	0	0	0	-0.6197	-0.0975	0.209	0.4997	0.86	-0.2176
Tb927.11.2880	KIN-A, kinesin, mitotic spindle	Cytoskeleton	Tb927.11.02880	-	NA	3004	0.3833	1.32e-13	0.5887	0.14982	0.5571	0.0282	0.86	0.4751	0	0	0	0	0.2016	0.0326	-0.266	-0.5921	1.33	0.4114
Tb927.6.3610	SET17	ZUnknown	Tb927.06.3610	-	1316	710	-0.6917	2.3e-17	-0.3781	0.374625	-0.3956	0.0393	1.07	0.4751	1	0	0	0	0.034	-0.1919	0.13	0.4308	1.09	0.1243
Tb927.11.9550	replication factor C, subunit 4, putative	DNA	Tb927.11.09550	-	NA	1458	-0.035	0.65	0.0523	1	0.0592	0.999	1.2	0.4751	0	0	0	0	-0.2954	-0.2354	0.177	-0.2395	1.08	0.111
Tb927.7.1840	zinc finger protein, putative	Zinc.finger	Tb927.07.1840	+	1219	1786	0.2229	0.00149	0.046	1	0.0305	0.999	0.75	0.4751	0	0	0	0	-1.5595	-0.1107	0.433	0.6931	1.05	0.0704
Tb927.6.3230	RNA pseudouridylate synthase, putative	rRNA.tRNA.process	Tb927.06.3230	+	2030	1058	0.1974	0.0136	-0.0074	1	-0.0032	0.999	1.14	0.4751	0	0	0	0	-0.1165	0.6584	0.168	0.4433	0.95	-0.074
Tb927.11.12310	CRK12 cdc2- like protein kinase	Cell.cycle	Tb927.11.12310	+	NA	2987	0.0154	0.822	0.1128	1	0.0657	0.999	0.81	0.4716	0	0	0	0	0.8214	0.163	-0.085	0.4167	1.36	0.4436
Tb927.4.4620	cytochrome oxidase subunit VIII (COXVIII)	Mito.e.transport	Tb927.04.4620	-	963	355	0.6461	3.26e-08	-0.1291	1	-0.1539	0.999	0.9	0.4716	0	1	0	0	-3.6707	-0.0671	-0.01	-2.0608	1.09	0.1243
Tb927.6.5140	ribosomal P protein AGP2beta-1	Ribosome	Tb927.06.5140	+	1479	558	0.3637	0.00033	-0.0094	1	0.0291	0.999	1.21	0.4716	0	0	0	0	-1.4785	-0.0436	0.568	-0.9877	1.04	0.0566
Tb927.3.5320	hypothetical protein, conserved, UBX5 of yeast 3e-4, blast-back +ve, interaction with ubiquitinated proteins	Ubiquitin.proteasome	Tb927.03.5320	+	1542	1658	-0.0839	0.347	-0.0875	1	-0.0799	0.999	1.15	0.4716	0	0	0	0	-0.235	-0.1838	0.096	0.1982	1.04	0.0566
Tb927.10.11700	guanylate kinase, putative	Nucleotides	Tb927.10.11700	+	857	2072	-0.465	5.67e-15	-0.5255	0.835531	-0.5427	0.574	1.22	0.4716	0	0	0	0	0.2502	-0.4804	0.208	-0.6305	1.01	0.0144
Tb927.10.11890	hypothetical protein, conserved	ZUnknown	Tb927.10.11890	+	1432	1064	0.1825	0.0283	-0.1147	1	-0.14	0.999	1.19	0.4716	0	0	0	0	-0.9916	0.0603	0.626	-0.6649	0.97	-0.0439
Tb927.9.2390	hypothetical protein, conserved	ZUnknown	Tb927.09.02390	-	NA	899	0.4577	2.47e-08	-0.1244	1	-0.1295	0.901	1.16	0.4716	0	0	0	0	-1.8594	-0.1863	0.686	-1.1775	0.95	-0.074
Tb927.1.1060	Cell cycle checkpoint protein RAD1-like, putative	Cell.cycle	Tb927.01.1060	+	985	610	0.2791	0.00472	0.1167	1	0.1142	0.999	1.04	0.4681	0	0	0	0	0.2274	0.0467	0.226	0.0576	1.24	0.3103
Tb927.2.3090	hypothetical protein, conserved	ZUnknown	#N/A	#N/A	2873	1098	-0.6666	0.00587	-0.2724	1	-0.4081	0.965	0.43	0.4681	1	0	0	0	-0.3169	0.0568	0.34	0.7677	1.22	0.2869
Tb927.3.1280	NPL4 family, putative	Ubiquitin.proteasome	Tb927.03.1280	+	1503	1419	0.0048	0.96	0.1583	0.962915	0.1524	0.803	1.19	0.4681	0	0	0	0	-0.612	-0.2505	0.222	-0.3111	1.09	0.1243
Tb927.11.14530	WLM domain containing protein, putative	ZUnknown	Tb927.11.14530	+	NA	1391	-0.0955	0.213	-0.0878	1	-0.1147	0.956	1.17	0.4681	0	0	0	0	0.2139	0.115	-0.251	0.2459	1.07	0.0976
Tb927.9.1530	hypothetical protein, conserved	ZUnknown	Tb927.09.01530	-	NA	2379	0.3541	5.02e-09	-0.0053	1	-0.0109	0.999	0.88	0.4647	0	0	0	0	-0.5459	-0.1255	0.342	-1.0792	1.22	0.2869
Tb927.10.10000	hypothetical protein, conserved	ZUnknown	Tb927.10.10000	+	2381	1836	0.3527	5.04e-09	-0.2426	1	-0.2475	0.831	0.84	0.4647	0	0	0	0	-2.014	0.2822	1.438	-1.4691	1.12	0.1635
Tb927.7.1780	Adenine phosphoribosyltransferase, putative	Nucleotides	Tb927.07.1780	+	1343	3110	-0.8372	1.67e-42	0.3895	0.753128	0.3649	0.781	0.71	0.4647	1	0	0	0	-0.7122	-1.0306	-0.597	-1.594	1.02	0.0286
Tb927.9.7650	ADP-ribosylation factor, putative	Vesicular.transport	Tb927.09.07650	-	NA	690	-0.6155	5.28e-12	-0.4714	0.110597	-0.4734	0.138	0.71	0.4647	1	0	0	0	0.169	-0.5232	-0.011	0.0297	1.01	0.0144
Tb927.10.5640	TbGemin2	RNA.processing	Tb927.10.05640	+	2565	1817	-0.0092	0.905	-0.1088	1	-0.125	0.938	0.94	0.4612	0	0	0	0	-0.172	-0.1959	0.08	0.0188	1.1	0.1375
Tb927.11.14360	mitochondrial carrier protein, MCP2	Mito.transport	Tb927.11.14360	+	NA	1436	0.0423	0.614	-0.0734	1	-0.0699	0.999	1.15	0.4612	0	0	0	0	#N/A	#N/A	-0.081	0.0582	1.09	0.1243
Tb927.8.3350	DNA polymerase theta (helicase domain only), half of polN? putative	DNA	Tb927.08.3350	+	4767	2110	-1.0271	1.06e-74	-0.4387	0.670118	-0.4455	0.329	0.78	0.4612	1	0	0	0	0.1305	-0.0774	-0.361	-0.246	1.03	0.0426
Tb927.3.4200	Integral membrane protein S linking to the trans Golgi network, putative	ZUnknown	Tb927.03.4200	-	1316	806	-0.1127	0.258	-0.3074	0.662416	-0.2851	0.672	1.07	0.4612	0	0	0	0	-0.7051	-0.3359	-0.047	0.0063	1.01	0.0144
Tb927.6.3680	POMP31	Mito.membrane	Tb927.06.3680	-	801	1051	-0.0725	0.426	-0.3257	0.198858	-0.3306	0.286	0.79	0.4577	0	0	0	0	-1.7592	-0.3729	-0.26	-1.2189	1.02	0.0286
Tb927.8.5780	phosphatase, putative	Phosphatase	Tb927.08.5780	+	1167	1229	-0.0807	0.318	-0.0607	1	-0.0369	0.999	1.12	0.4577	0	0	0	0	-0.3093	0.4995	-0.139	-0.4631	1	0
Tb927.4.2480	8-oxoguanine DNA glycosylase, putative	DNA	Tb927.04.2480	+	2056	928	-0.1601	0.0681	-0.1723	1	-0.1237	0.99	0.91	0.4577	0	0	0	0	-0.1342	0.1909	0.247	-0.048	0.98	-0.0291
Tb927.2.5440	hypothetical protein, conserved	ZUnknown	Tb927.02.5440	-	4720	2390	0.2464	5.81e-05	0.4776	0.685828	0.4035	0.27	0.75	0.4542	0	0	0	0	0.9917	0.8839	0.044	0.2766	1.12	0.1635
Tb927.6.3410	hypothetical protein, conserved	ZUnknown	Tb927.06.3410	-	1334	511	-0.1571	0.192	-0.1466	1	-0.1749	0.999	0.88	0.4542	0	0	0	0	1.1003	0.0116	-0.923	1.7178	1	0
Tb927.4.1260	hypothetical protein, conserved	ZUnknown	Tb927.04.1260	-	1318	878	0.1644	0.0659	-0.1152	0.998401	-0.1062	0.999	1.05	0.4542	0	0	0	0	0.0175	-0.0373	0.856	-0.5162	0.98	-0.0291
Tb927.11.16810	dynein light intermediate chain D1bLIC, putative	Cytoskeleton	Tb927.11.16810	-	NA	2431	-0.2893	1.09e-05	0.0958	1	0.0651	0.999	1.15	0.4542	0	0	0	0	0.7661	-0.4404	-0.616	0.6389	0.95	-0.074
Tb927.9.5000	hypothetical protein, conserved	ZUnknown	Tb927.09.05000	+	NA	877	0.2386	0.00316	-0.0595	1	-0.08	0.999	1.21	0.4507	0	0	0	0	-0.5719	-0.0473	0.103	0.1502	1.18	0.2388
Tb927.5.2180	hypothetical protein, conserved	ZUnknown	Tb927.05.2180	+	1603	1481	0.0704	0.374	-0.2234	1	-0.1416	0.999	0.82	0.4507	0	0	0	0	0.1752	-0.0584	-0.158	0.1699	0.95	-0.074
Tb927.9.2560	TLC domain containing protein, putative	ZUnknown	Tb927.09.02560	-	NA	1254	0.2328	0.0018	0.2697	1	-0.0031	0.999	1.25	0.4471	0	0	0	0	0.6655	-0.3319	-0.044	0.2959	2.04	1.0286
Tb927.11.6520	hypothetical protein, conserved	ZUnknown	Tb927.11.06520	-	NA	565	0.0967	0.422	0.1636	1	0.1498	0.98	1.06	0.4471	0	0	0	0	0.0218	0.3904	0.323	0.5584	1.04	0.0566
Tb927.9.8700	hypothetical protein, conserved	ZUnknown	Tb927.09.08700	-	NA	1069	0.0957	0.242	-0.0629	1	-0.0611	0.999	1.27	0.4471	0	0	0	0	-0.9674	-0.0536	0.361	0.1602	0.89	-0.1681
Tb927.10.5500	hypothetical protein, conserved,, in NADH dehydrogenase complex	Mito.e.transport	Tb927.10.05500	+	1957	1117	0.6623	1.74e-20	0.1133	1	0.1111	0.771	1.23	0.4436	0	1	0	0	-0.1412	0.0381	1.115	-0.1451	1.13	0.1763
Tb927.6.4700	hypothetical protein, conserved	ZUnknown	Tb927.06.4700	+	2168	932	0.199	0.0151	-0.0399	1	-0.0234	0.999	0.95	0.4436	0	0	0	0	-0.2917	0.0568	0.443	-0.1784	1.13	0.1763
Tb927.8.2410	amidase, putative	Protease	Tb927.08.2410	+	1108	648	0.1633	0.108	-0.0034	1	0.0017	1	0.96	0.4436	0	0	0	0	-1.0598	-0.4305	0.602	-0.4925	1.08	0.111
Tb927.5.690	MIC17	Mito.biogenesis	Tb927.05.0690	+	1900	434	0.0559	0.666	-0.0583	1	0.0278	0.999	1.03	0.4436	0	0	0	0	1.5465	0.1972	0.281	0.2941	1.04	0.0566
Tb927.11.350	RBP43	RNA.binding	Tb927.11.00350	-	NA	1388	-0.1693	0.0282	-0.2382	0.829445	-0.2333	0.687	1.22	0.4436	0	0	0	0	-0.4853	0.4293	-0.016	-1.028	0.94	-0.0893
Tb927.10.6000	hypothetical protein, conserved	ZUnknown	Tb927.10.06000	-	6155	5604	-0.1518	0.000823	0.5328	0.586872	0.4258	0.504	0.5	0.4401	0	0	0	0	1.047	0.435	0.32	0.1386	1.48	0.5656
Tb927.1.4370	Putative integral membrane protein conserved region (DUF2404), putative	ZUnknown	Tb927.01.4370	+	2839	2326	-0.0546	0.439	0.1679	0.886639	0.1163	0.97	1.07	0.4401	0	0	0	0	0.2494	-0.2071	-0.43	0.6347	1.31	0.3896
Tb927.6.1700	hypothetical protein, LIM-type zinc finger	Zinc.finger	Tb927.06.1700	-	839	718	0.4364	5.05e-06	0.0622	1	0.0486	0.999	1.29	0.4401	0	0	0	0	-1.8837	0.236	0.168	-1.0109	1.28	0.3561
Tb927.1.730	NADH-ubiquinone oxidoreductase complex I subunit, putative	Mito.e.transport	Tb927.01.0730	-	1927	1628	-0.1413	0.0474	-0.5221	0.0833479	-0.5358	0.0623	0.98	0.4401	0	0	0	0	-0.4965	-0.0703	0.712	-0.773	1.17	0.2265
Tb927.11.14540	hypothetical protein, conserved	ZUnknown	Tb927.11.14540	+	NA	1717	-0.0064	0.938	0.441	0.934575	0.3968	0.891	1.22	0.4401	0	0	0	0	1.8714	0.1433	-0.085	1.9921	1.14	0.189
Tb927.10.5110	KREPA4	Mito.RNA	Tb927.10.05110	+	729	483	0.0667	0.581	0.0103	1	-0.0193	0.999	0.76	0.4401	0	0	0	0	-0.5514	-0.1082	-0.216	0.1262	1.11	0.1506
Tb927.10.13900	UDP-galactose transporter	Glycans	Tb927.10.13900	-	1557	1169	-0.0492	0.567	-0.0327	1	-0.0371	0.999	1.19	0.4401	0	0	0	0	0.6371	-0.2099	0.317	0.6646	1.03	0.0426
Tb927.11.1720	hypothetical protein, conserved	ZUnknown	Tb927.11.01720	-	NA	917	-0.0586	0.542	-0.0135	1	-0.1178	0.999	0.99	0.4365	0	0	0	0	-0.0668	0.2587	0.473	0.1827	1.47	0.5558
Tb927.10.7530	hypothetical protein	ZUnknown	Tb927.10.07530	-	599	502	0.2104	0.0449	-0.0261	1	-0.0445	0.999	0.76	0.4365	0	0	0	0	1.0748	-0.2473	-0.037	0.2329	1.13	0.1763
Tb927.11.3640	Mitochondrial ribosomal protein L27	Mito.translation	Tb927.11.03640	+	NA	546	0.1961	0.0725	-0.1652	1	-0.143	0.388	1.21	0.4365	0	0	0	0	-0.6088	0.0702	0.084	-0.5516	1.11	0.1506
Tb927.6.3840	reticulon domain protein	Cytoskeleton	Tb927.06.3840	-	2356	4282	-0.4448	1.06e-10	-0.2538	1	-0.2746	0.994	0.48	0.4365	0	0	0	0	0.2211	-0.5908	-1.528	-0.3575	1.04	0.0566
Tb927.9.6940	DNA topoisomerase type IB small subunit	DNA	Tb927.09.06940	+	NA	1237	-0.1423	0.0606	0.1564	1	0.1329	0.531	1.05	0.4365	0	0	0	0	-0.0158	0.4996	0.434	0.3946	0.98	-0.0291
Tb927.9.13340	Nop53 (60S ribosomal biogenesis), putative	ZUnknown	Tb927.09.13340	-	NA	1127	-0.5279	1.1e-13	-0.353	0.404618	-0.3275	0.683	1.1	0.4365	0	0	0	0	-0.8273	-0.0778	1.049	-0.4274	0.97	-0.0439
Tb927.5.2460	hypothetical protein, conserved	ZUnknown	Tb927.05.2460	+	1479	1006	-0.2007	0.0143	-0.1422	1	-0.1298	0.999	1.27	0.4365	0	0	0	0	0.949	-0.0128	0.185	0.4324	0.9	-0.152
Tb927.11.16270	DNAexcision repair helicase XPBR	DNA	Tb927.11.16270	-	NA	2208	0.0351	0.604	0.1122	1	-0.1458	0.999	0.94	0.433	0	0	0	0	0.0873	-0.1848	0.036	-0.0936	1.27	0.3448
Tb927.11.1020	ribokinase, putative	PPP	Tb927.11.01020	+	NA	3389	-0.1253	0.0292	-0.2209	0.979636	-0.3627	0.169	0.97	0.433	0	0	0	0	-1.5033	0.0326	-0.504	-1.993	1.19	0.251
Tb927.8.8340	CRAL/TRIO domain containing protein, putative	ZUnknown	Tb927.08.8340	+	843	1421	-1.5319	3.71e-82	-0.174	1	-0.1492	0.999	0.8	0.433	1	0	0	0	1.2708	-0.1933	0.451	0.9361	1.17	0.2265
Tb927.9.8180	hypothetical protein, conserved, SSF52047 RNI-like	ZUnknown	Tb927.09.08180	-	NA	3434	0.0398	0.5	0.6198	0.0239435	0.5811	0.0809	1.13	0.433	0	0	0	1	0.1248	-0.1546	-0.285	0.235	1.1	0.1375
Tb927.4.4740	ER to golgi transport of GPI proteins OR Dihydroceramide synthase)	Lipids	Tb927.04.4740	-	1417	1295	0.1707	0.0283	0.2889	1	0.2666	0.967	1.04	0.433	0	0	0	0	0.3471	0.5824	-0.378	0.2318	1.1	0.1375
Tb927.8.1790	hypothetical protein, conserved	ZUnknown	Tb927.08.1790	-	1129	1005	-0.4846	1.06e-09	0.3519	1	0.3262	0.975	0.87	0.433	0	0	0	0	-1.7503	0.039	0.336	-1.3463	1.05	0.0704
Tb927.8.5510	apurinic/apyrimidinic endonuclease, putative	DNA	Tb927.08.5510	+	1218	1343	-0.1604	0.026	0.0461	1	0.0318	0.999	1.32	0.433	0	0	0	0	-0.1015	0.1124	-0.417	-0.2553	1.03	0.0426
Tb927.10.12340	hypothetical protein, conserved	ZUnknown	Tb927.10.12340	-	3011	956	-0.0898	0.35	-0.1387	1	-0.1464	0.999	0.67	0.4294	0	0	0	0	0.3849	0.3898	-0.209	0.5838	1.7	0.7655
Tb927.8.1510	ATP-dependent DEAD/H RNA helicase, putative Dbp3, ribosome biogenesis? Cis-spliced	rRNA.tRNA.process	Tb927.08.1510	+	3047	3443	-0.9597	4.54e-52	-0.7275	0.187347	-0.7276	0.0585	0.81	0.4294	1	0	0	0	#N/A	0.5028	0.524	-0.3091	1.09	0.1243
Tb927.4.4630	hypothetical protein, conserved	ZUnknown	Tb927.04.4630	-	536	194	0.6655	5.03e-05	0.0114	1	-0.0166	0.999	1.04	0.4294	0	1	0	0	-0.8551	0.1265	0.651	-1.2066	1.06	0.0841
Tb927.9.13580	hypothetical protein, conserved	Mito.pathway	Tb927.09.13580	-	NA	852	-0.0365	0.723	-0.9237	0.00524153	-0.9123	5.29e-05	1.06	0.4294	0	0	1	0	-0.9962	-0.2686	0.904	-1.5824	1.04	0.0566
Tb927.6.3720	hypothetical protein, conserved	ZUnknown	Tb927.06.3720	-	2793	2487	-0.7709	5.52e-47	-0.4611	0.24375	-0.4708	0.0051	0.88	0.4294	1	0	0	0	-0.3607	0.318	0.075	0.7104	1.04	0.0566
Tb927.7.5790	protein disulfide isomerase, ERp44-like	Chaperone	Tb927.07.5790	+	1535	4299	-0.7365	5.4e-24	0.421	1	0.426	0.996	0.42	0.4294	1	0	0	0	1.8333	-1.0081	-0.83	1.28	1	0
Tb927.6.2710	Possible HEL2 homologue, implicated in NGD and ribosome-associated quality control. N-terminus has four C2H2 fingers and ring finger, matches E3 ligases. C-terminus has poly(Gln) repeats	Translation	Tb927.06.2710	+	3585	2191	-0.1026	0.103	-0.0109	1	-0.0342	0.999	1.14	0.4294	0	0	0	0	-0.2277	0.3402	0.486	0.2618	0.98	-0.0291
Tb927.3.4690	DTW domain containing protein, putative	ZUnknown	Tb927.03.4690	-	2010	938	-0.2127	0.0072	-0.2154	1	-0.1915	0.999	1.03	0.4294	0	0	0	0	-0.3123	0.0967	0.496	0.2765	0.97	-0.0439
Tb927.10.2650	hypothetical protein, conserved	ZUnknown	Tb927.10.02650	+	4348	4010	-0.1495	0.0137	0.2379	0.997437	0.1908	0.879	0.98	0.4258	0	0	0	0	0.524	0.61	0.1	0.1097	1.37	0.4542
Tb927.10.680	Protein of unknown function (DUF971), putative	ZUnknown	Tb927.10.00680	+	936	774	0.293	0.00068	0.1487	1	0.1672	0.947	1.01	0.4258	0	0	0	0	-0.2657	-0.2045	0.277	0.9193	1.1	0.1375
Tb927.10.3540	hypothetical protein, conserved	ZUnknown	Tb927.10.03540	+	2359	1189	-0.3543	4.3e-07	-0.1657	1	-0.1831	0.999	0.71	0.4258	0	0	0	0	-0.3479	0.0389	0.59	-0.6493	1.09	0.1243
Tb927.11.6580	hypothetical protein, conserved	ZUnknown	Tb927.11.06580	-	NA	1663	0.03	0.741	-0.1915	1	-0.2014	0.999	0.59	0.4258	0	0	0	0	-0.7756	-0.1781	0.286	0.3615	1	0
Tb927.8.6580	SDH1 succinate dehydrogenase (complex II) subunit, flavoprotein	Mito.e.transport	Tb927.08.6580	-	3238	2232	0.527	1.28e-16	0.1293	1	0.1266	0.999	1.14	0.4222	0	0	0	0	-1.315	0.083	0.21	-1.5321	1.42	0.5059
Tb927.5.2400	ubiquitin carboxyl-terminal hydrolase, Clan CA cysteine peptidase, family C12, putative	Ubiquitin.proteasome	Tb927.05.2400	+	6032	4078	-0.2554	5.22e-08	1.1409	0.0068029	1.0191	0.02	1.09	0.4222	0	0	0	1	1.8303	0.7437	0.242	0.439	1.22	0.2869
Tb927.10.8690	TIGR00269 family protein, putative	ZUnknown	Tb927.10.08690	+	1764	1169	-0.0137	0.891	0.0661	1	0.076	0.999	1.06	0.4222	0	0	0	0	-0.0726	-0.1177	-0.023	-0.2019	1.1	0.1375
Tb927.8.7120	Squalene synthase	Sterols	Tb927.08.7120	+	2718	1458	0.1012	0.212	0.0446	1	0.0664	0.999	0.88	0.4222	0	0	0	0	-3.3119	0.6104	-0.214	-1.5355	1.1	0.1375
Tb927.8.6810	protein kinase, putative	Protein.kinase	Tb927.08.6810	-	1448	1051	0.0497	0.563	-0.0447	1	-0.0506	0.999	1.08	0.4222	0	0	0	0	-0.122	0.0754	0.182	0.1731	1.04	0.0566
Tb927.9.8370	hypothetical protein, conserved	ZUnknown	Tb927.09.08370	-	NA	876	0.3809	1.21e-06	0.4248	0.45374	0.0608	0.999	0.92	0.4186	0	0	0	0	0.1523	0.1131	0.292	0.7364	1.78	0.8319
Tb927.9.10530	FAZ4 flagellar attachment zone protein	Cytoskeleton	Tb927.09.10530	-	NA	3901	0.1191	0.0614	0.443	0.467923	0.4082	0.634	1.29	0.4186	0	0	0	0	1.3114	1.0275	-0.38	0.1525	1.15	0.2016
Tb927.9.11960	hypothetical protein, conserved	ZUnknown	Tb927.09.11960	+	NA	1904	-0.0457	0.517	-0.0042	1	-0.0063	0.999	0.97	0.4186	0	0	0	0	0.046	0.0003	0.575	0.1632	1.13	0.1763
Tb927.8.5750	hypothetical protein, conserved	ZUnknown	Tb927.08.5750	+	2655	2389	0.3115	1.34e-08	-0.0502	1	-0.0433	0.999	0.78	0.4186	0	0	0	0	-0.1963	0.0604	0.374	-0.0658	1.13	0.1763
Tb927.9.6270	hypothetical protein, conserved	ZUnknown	Tb927.09.06270	+	NA	1209	0.4534	3.23e-11	-0.1004	1	-0.1044	0.999	0.94	0.4186	0	0	0	0	-0.7634	0.2064	0.484	-0.3965	1.11	0.1506
Tb927.10.5320	RNA editing endoribonuclease (KREN3)	Mito.RNA	Tb927.10.05320	+	2844	1882	0.0471	0.543	0.0722	1	0.0109	0.999	0.85	0.4186	0	0	0	0	-0.0826	-0.0728	0.063	0.0392	1.11	0.1506
Tb927.9.7270	hypothetical protein	ZUnknown	Tb927.09.07270	+	NA	308	0.0539	0.747	-0.0732	1	-0.2516	0.901	0.87	0.4186	0	0	0	0	2.0015	-0.0815	0.299	0.8997	1.07	0.0976
Tb927.8.2690	SET21	ZUnknown	Tb927.08.2690	+	3143	758	-0.0272	0.814	0.0952	1	0.0277	0.999	0.9	0.4186	0	0	0	0	-0.3561	0.667	1.229	-0.2695	1.03	0.0426
Tb927.8.710	DRBD17	RNA.binding	Tb927.08.0710	-	6194	14019	-0.863	8.29e-62	-0.3736	1	-0.3522	0.879	1.13	0.4186	1	0	0	0	1.4645	0.6064	-0.892	-1.0299	1.02	0.0286
Tb927.11.7060	acidocalcisomal pyrophosphatase (VSP1)	Calcium	Tb927.11.07060	-	NA	7217	0.4738	1.06e-30	0.0102	1	-0.1071	0.999	1.2	0.4186	0	0	0	0	0.0635	-0.1084	0.754	0.0195	0.84	-0.2515
Tb927.9.2240	protein kinase, putative	Protein.kinase	Tb927.09.02240	-	NA	2539	0.2319	2.89e-05	0.7439	0.00365184	0.5456	0.00553	0.75	0.415	0	0	0	1	-0.0848	0.2246	0.155	-0.2623	1.61	0.6871
Tb927.10.740	structural maintenance of chromosome 4 (SMC4)	Chromatin	Tb927.10.00740	+	4883	5705	-0.0722	0.258	0.3715	0.697511	0.373	0.695	1.2	0.415	0	0	0	0	1.3339	0.2032	-0.473	0.143	1.15	0.2016
Tb927.4.1380	D-Tyr-tRNA(Tyr) deacylase, putative	ZUnknown	Tb927.04.1380	-	685	282	0.3425	0.0114	0.0416	1	0.0555	0.999	0.87	0.415	0	0	0	0	-0.5265	-0.1483	0.522	-0.7433	1.15	0.2016
Tb927.7.3410	Centrin4 - basal bodies and bilobe	Cytoskeleton	Tb927.07.3410	-	752	2102	0.0099	0.895	0.0706	1	0.0583	0.999	0.54	0.415	0	0	0	0	0.4967	-0.2374	-0.347	-0.7153	1.12	0.1635
Tb927.1.4500	SNARE associated Golgi protein, putative	ZUnknown	Tb927.01.4500	+	1371	1788	0.0947	0.177	0.0386	1	-0.0051	0.999	0.55	0.415	0	0	0	0	0.3585	-0.2561	-0.227	0.1803	1.1	0.1375
Tb927.3.3880	hypothetical protein, conserved	ZUnknown	Tb927.03.3880	+	1087	661	-0.1625	0.136	-0.0418	1	-0.0702	0.999	0.86	0.415	0	0	0	0	-0.8258	-0.5398	-0.394	-0.5779	1.08	0.111
Tb927.10.15510	hypothetical protein, conserved	ZUnknown	Tb927.10.15510	+	1274	620	-0.2323	0.0208	-0.3297	0.384885	-0.301	0.484	1.28	0.415	0	0	0	0	-0.991	-0.2387	0.584	-0.4782	1.05	0.0704
Tb927.11.15820	superoxide dismutase, putative	Mito.pathway	Tb927.11.15820	-	NA	1178	0.2755	0.00037	-0.0371	1	-0.0342	0.999	1.23	0.415	0	0	0	0	-1.0825	0.2649	0.078	-0.7509	1.01	0.0144
Tb927.10.3250	Mitochondrial SSU ribosomal protein, putative	Mito.translation	Tb927.10.03250	+	1153	808	0.1703	0.072	-0.1545	0.786069	-0.1623	0.799	1.01	0.415	0	0	0	0	-0.8164	0.0558	0.588	-0.8617	1	0
Tb927.1.760	wd40 repeat domain-containing protein	ZUnknown	Tb927.01.0760	-	2835	1464	0.0922	0.203	-0.0191	1	-0.0312	0.999	0.75	0.4114	0	0	0	0	0.5577	0.1281	0.175	0.3227	1.19	0.251
Tb927.11.5120	SET11	ZUnknown	Tb927.11.05120	+	NA	1797	-0.0455	0.527	0.7639	0.157356	0.7124	0.0632	0.7	0.4114	0	0	0	0	1.2843	-0.2196	0.119	1.6312	1.11	0.1506
Tb927.8.4630	hypothetical protein, conserved	ZUnknown	Tb927.08.4630	-	608	721	-0.0587	0.572	0.2023	0.835531	0.2054	0.936	0.96	0.4114	0	0	0	0	-1.6399	-0.2482	0.661	-0.5	1.07	0.0976
Tb927.9.5630	KREPB7	Mito.RNA	Tb927.09.05630	+	NA	1101	0.1462	0.0867	0.0369	1	0.0258	0.999	0.92	0.4114	0	0	0	0	-0.7276	-0.1485	0.474	0.0497	1.07	0.0976
Tb927.6.1760	KU80 protein (KU80)	DNA	Tb927.06.1760	-	2376	2130	0.0917	0.158	0.2982	1	0.2855	0.98	0.79	0.4114	0	0	0	0	-0.897	0.7211	0.128	-0.5541	1.04	0.0566
Tb927.5.4560	guanine deaminase, putative	Nucleotides	Tb927.05.4560	+	2602	2955	-1.5387	1.56e-123	-0.638	0.438204	-0.6674	0.0168	1.12	0.4114	1	0	0	0	0.9064	0.1167	0.306	-0.6953	0.99	-0.0145
Tb927.9.15360	40S ribosomal protein S6	Ribosome	Tb927.09.15360	+	NA	15831	-0.1327	0.0148	-0.2776	0.767279	-0.2778	0.917	0.89	0.4114	0	0	0	0	#N/A	#N/A	0.588	-1.0581	0.99	-0.0145
Tb927.3.5120	Ankyrin repeats (3 copies), putative	ZUnknown	Tb927.03.5120	+	2344	1388	-0.1901	0.00535	-0.1852	1	-0.1955	0.857	0.88	0.4114	0	0	0	0	0.3575	-0.1569	-0.382	0.5024	0.98	-0.0291
Tb927.7.2700	NADH-cytochrome b5 reductase, putative (B5R)	Mito.e.transport	Tb927.07.2700	-	1227	1617	0.1991	0.00345	-0.4231	0.292294	-0.4372	0.244	0.84	0.4114	0	0	0	0	-2.1351	-0.0955	-0.738	-2.4648	0.98	-0.0291
Tb927.2.3910	beta-ketoacyl synthase family protein, putative	Lipids	Tb927.02.3910	-	3158	1262	0.1299	0.0797	-0.0713	1	0.0699	0.999	0.8	0.4114	0	0	0	0	-0.2344	0.24	0.45	-1.0988	0.83	-0.2688
Tb927.5.1980	Galactose oxidase, central domain/Kelch motif containing protein, putative	ZUnknown	Tb927.05.1980	+	4334	1810	-0.3397	1.02e-08	0.2837	0.870225	0.2911	0.792	0.95	0.4078	0	0	0	0	0.9248	-0.1335	0.267	0.6333	1.18	0.2388
Tb927.10.6480	hypothetical protein, conserved, polyprotein-like	ZUnknown	Tb927.10.06480	+	1546	1101	0.0798	0.394	-0.1325	1	-0.1035	0.999	1.15	0.4078	0	0	0	0	0.5282	0.0992	0.198	0.1009	1.05	0.0704
Tb927.10.13910	hypothetical protein, conserved	ZUnknown	Tb927.10.13910	-	1103	484	0.2565	0.017	-0.0423	1	-0.0902	0.999	0.97	0.4078	0	0	0	0	-1.6267	-0.2101	0.263	-0.6806	1.02	0.0286
Tb927.11.15610	hypothetical protein, conserved	ZUnknown	Tb927.11.15610	-	NA	2007	-0.2042	0.000544	0.064	1	0.1033	0.999	0.87	0.4078	0	0	0	0	1.3287	0.3453	0.592	0.6579	0.68	-0.5564
Tb927.11.8100	Ankyrin repeats (3 copies), putative	ZUnknown	Tb927.11.08100	+	NA	757	-0.0056	0.961	-0.1031	1	-0.1097	0.999	1.11	0.4042	0	0	0	0	-1.0531	-0.3102	0.688	-0.5721	1.14	0.189
Tb927.5.3350	iron superoxide dismutase, putative	Mito.pathway	Tb927.05.3350	-	1998	1751	0.7288	5.28e-29	0.2626	1	0.2179	0.999	0.62	0.4042	0	1	0	0	-0.485	0.0176	-0.643	-1.7906	1.13	0.1763
Tb927.9.12450	class I transcription factor A, subunit 2 (CITFA-2)	RNA.synthesis	Tb927.09.12450	+	NA	1468	-0.1418	0.0611	0.2129	1	0.213	0.995	1.11	0.4042	0	0	0	0	0.0607	0.3568	-0.341	0.9194	1.12	0.1635
Tb927.7.7270	hypothetical protein, conserved	Cytoskeleton	Tb927.07.7270	-	3619	1972	-0.0749	0.242	0.4479	0.532984	0.4429	0.136	1.27	0.4042	0	0	0	0	0.6371	0.2896	-0.279	0.2642	1.1	0.1375
Tb927.7.2750	protein kinase, putative	Protein.kinase	Tb927.07.2750	+	1569	1151	0.1711	0.0427	-0.2062	0.883436	-0.2184	0.346	1.09	0.4042	0	0	0	0	-0.1868	0.1693	0.636	0.0646	1.06	0.0841
Tb927.7.6240	hypothetical protein, conserved	ZUnknown	Tb927.07.6240	-	1692	997	-0.09	0.278	0.0209	1	0.0143	0.999	0.72	0.4042	0	0	0	0	-0.9986	-0.1052	0.104	-0.1574	1.04	0.0566
Tb927.9.9180	hypothetical protein, conserved	ZUnknown	Tb927.09.09180	-	NA	756	-0.6471	8.47e-15	-0.9935	3.2982e-05	-0.9215	1.42e-05	1.02	0.4042	1	0	1	0	-0.4276	-0.3743	-0.52	0.36	1	0
Tb927.11.12590	Der1-like family, putative	ZUnknown	Tb927.11.12590	+	NA	1765	0.0774	0.245	-0.1298	1	-0.1116	0.999	0.93	0.4042	0	0	0	0	0.4646	-0.3216	0.151	-0.0036	0.96	-0.0589
Tb927.9.13540	hypothetical protein, conserved	Mito.pathway	Tb927.09.13540	-	NA	1393	0.1666	0.0218	-0.0488	1	-0.0595	0.999	0.92	0.4042	0	0	0	0	-0.4375	-0.2509	0.141	0.0161	0.94	-0.0893
Tb927.7.250	ZC3H16	RNA.binding	Tb927.07.0250	+	2569	1629	0.0292	0.719	0.1381	1	0.1493	0.87	0.83	0.4005	0	0	0	0	0.4924	-0.0871	-0.002	0.423	1.33	0.4114
Tb927.2.3920	Complex 1 protein (LYR family), putative	ZUnknown	Tb927.02.3920	-	612	531	0.186	0.0967	-0.0566	1	-0.0429	0.999	0.87	0.4005	0	0	0	0	-2.075	-0.7311	0.377	-0.7973	1.09	0.1243
Tb927.7.1320	10 kDa heat shock protein, putative (HSP10)	Chaperone	Tb927.07.1320	+	734	6179	-0.0024	0.972	-0.1665	1	-0.1801	0.984	0.43	0.4005	0	0	0	0	-0.8494	0.2559	1.571	-1.8262	1.08	0.111
Tb927.8.2010	hypothetical protein, conserved	ZUnknown	Tb927.08.2010	+	669	425	0.0951	0.473	-0.0136	1	-0.0357	0.999	0.99	0.4005	0	0	0	0	-0.7769	-0.1392	0.179	-0.0269	1.01	0.0144
Tb927.7.2110	KKT11 Kinetochore protein	Cell.cycle	Tb927.07.2110	-	1737	1183	-0.9289	1.77e-30	-0.5112	0.885678	-0.522	0.84	0.38	0.4005	1	0	0	0	1.1692	-0.5479	-1.003	-0.1869	0.95	-0.074
Tb927.4.4510	protein phosphatase 2C, putative	Protein.phosphatase	Tb927.04.4510	-	7931	6625	-0.4317	8.09e-16	1.6709	3.80324e-08	1.0413	0.000282	0.44	0.3969	0	0	0	1	1.7425	0.9677	0.385	1.1446	1.17	0.2265
Tb927.8.6300	hypothetical protein, conserved	ZUnknown	Tb927.08.6300	+	1794	1611	-0.0471	0.559	0.0256	1	0.0257	0.999	1.14	0.3969	0	0	0	0	-0.6195	-0.0768	0.168	-0.1126	0.96	-0.0589
Tb927.8.4500	eIF4G5	Translation	Tb927.08.4500	-	5771	4870	-0.0985	0.0459	1.1709	0.0119313	0.7785	0.00647	0.73	0.3932	0	0	0	1	1.2881	0.5436	0.232	-0.2284	1.47	0.5558
Tb927.5.510	SDH10 succinate dehydrogenase (complex II) subunit	Mito.e.transport	Tb927.05.0510	-	2123	659	0.3884	0.000256	0.2226	1	0.2313	0.982	0.83	0.3932	0	0	0	0	-0.0967	0.3393	0.151	-1.0229	1.03	0.0426
Tb927.11.9650	hypothetical protein, conserved	ZUnknown	Tb927.11.09650	-	NA	1305	0.1834	0.0105	-0.0226	1	-0.0363	0.999	1.11	0.3932	0	0	0	0	-0.2967	0.0018	0.302	0.1304	1.02	0.0286
Tb927.3.1860	SET30	ZUnknown	Tb927.03.1860	-	2845	1740	0.0058	0.942	0.3137	1	0.315	0.995	0.97	0.3932	0	0	0	0	-0.037	0.5949	0.015	0.1642	0.98	-0.0291
Tb927.11.5130	hypothetical protein, conserved	ZUnknown	Tb927.11.05130	+	NA	1094	-0.1559	0.0382	-0.0644	1	-0.0613	0.999	0.86	0.3932	0	0	0	0	0.3	-0.3921	0.252	0.2766	0.94	-0.0893
Tb927.10.11560	hypothetical protein, conserved	ZUnknown	Tb927.10.11560	+	1428	778	-0.0733	0.477	-0.1149	1	-0.1097	0.999	0.87	0.3932	0	0	0	0	0.3952	-0.2602	0.223	0.5391	0.87	-0.2009
Tb927.11.15800	CIF1 = TOEFAZ1	Cytoskeleton	Tb927.11.15800	-	NA	4298	0.3843	1.03e-09	0.4289	0.724099	0.4326	0.659	1.02	0.3896	0	0	0	0	1.9685	0.7212	0.265	0.7578	1.02	0.0286
Tb927.10.12470	hypothetical protein, conserved	ZUnknown	Tb927.10.12470	-	2497	1577	0.1111	0.117	-0.0335	1	-0.0831	0.999	0.83	0.3896	0	0	0	0	-0.1579	-0.208	-0.289	-0.1186	0.99	-0.0145
Tb927.6.2020	FG-GAP repeat protein, putative,intergrin alpha chain protein, putative	Cytoskeleton	Tb927.06.2020	-	2535	1539	-0.1164	0.0904	-0.1465	0.84718	-0.1482	0.57	1.09	0.3896	0	0	0	0	-0.0697	0.1249	0.232	0.3272	0.94	-0.0893
Tb927.7.2980	Nitroreductase family, putative	ZUnknown	Tb927.07.2980	+	1291	3259	1.7252	2.28e-232	-0.3229	0.983774	-0.3502	0.956	1.15	0.3859	0	1	0	0	-2.5682	-0.633	0.47	-2.0618	2.34	1.2265
Tb927.11.210	hypothetical protein, conserved	ZUnknown	Tb927.11.00210	-	NA	2055	0.1194	0.0754	-0.0067	1	-0.0038	0.999	1.04	0.3859	0	0	0	0	0.3123	0.0133	-0.066	0.2165	1.39	0.4751
Tb927.11.2620	hypothetical protein, conserved, no domains	ZUnknown	Tb927.11.02620	-	NA	1511	-0.4787	9.07e-14	-0.5377	0.645695	-0.5842	0.117	1.2	0.3859	0	0	0	0	-0.162	0.3249	0.471	0.1679	1.14	0.189
Tb927.8.1060	malonyl-CoA decarboxylase, mitochondrial precursor, putative	Prenylation	Tb927.08.1060	-	2397	2179	0.2907	7.94e-07	-0.1126	1	-0.1181	0.999	0.85	0.3859	0	0	0	0	0.3515	0.2513	0.529	0.6659	1.07	0.0976
Tb927.9.13630	hypothetical protein, conserved	ZUnknown	Tb927.09.13630	-	NA	1261	0.0286	0.741	-0.1242	1	-0.1148	0.999	1.15	0.3859	0	0	0	0	-1.9042	-0.2837	0.814	-0.3523	1.02	0.0286
Tb927.11.12400	hypothetical protein, conserved	ZUnknown	Tb927.11.12400	+	NA	2094	0.2682	3.14e-06	-0.1414	1	-0.1108	0.999	0.73	0.3822	0	0	0	0	0.1716	0.4897	0.132	0.1988	1.15	0.2016
Tb927.4.3920	CRAL/TRIO domain containing protein, putative	ZUnknown	Tb927.04.3920	-	4041	1902	-0.5853	1.66e-24	-0.2692	1	-0.2667	0.914	0.85	0.3822	1	0	0	0	-0.4208	1.0069	0.459	-0.9807	1.04	0.0566
Tb927.2.2390	hypothetical protein, conserved	ZUnknown	Tb927.02.2390	-	1202	762	-0.0892	0.359	0.0147	1	-0.0032	0.999	0.96	0.3822	0	0	0	0	-1.1621	0.2129	0.153	-0.1673	1.03	0.0426
Tb927.6.4120	TBC-E likely GAP	Signalling	Tb927.06.4120	-	1319	747	-0.3451	0.000127	-0.3395	0.632325	-0.3464	0.366	1.11	0.3822	0	0	0	0	-0.6188	-0.3107	0.611	0.5343	0.96	-0.0589
Tb927.9.6150	protein phosphatase 2A regulatory subunit, putative	Protein.phosphatase	Tb927.09.06150	+	NA	2487	0.1704	0.00828	-0.1215	1	-0.1155	0.999	1.03	0.3785	0	0	0	0	-0.0944	0.0028	-0.038	-0.0938	1.09	0.1243
Tb927.11.11050	hypothetical protein, conserved	ZUnknown	Tb927.11.11050	+	NA	720	0.2575	0.00842	0.0366	1	0.0213	0.999	0.89	0.3785	0	0	0	0	-0.8087	-0.6228	-0.463	-0.7331	1.06	0.0841
Tb927.10.9120	hypothetical protein, conserved	Mito.pathway	Tb927.10.09120	+	1626	661	0.2283	0.0263	-0.1476	1	-0.1655	0.557	0.76	0.3785	0	0	0	0	-0.5507	0.1223	-0.017	-0.094	1.04	0.0566
Tb927.7.7210	POMP37	Mito.membrane	Tb927.07.7210	-	3388	1453	0.3538	6.05e-07	-0.1603	1	-0.108	0.999	0.81	0.3785	0	0	0	0	-0.6115	0.5704	0.411	-0.7924	1.03	0.0426
Tb927.10.14590	Protein of unknown function (DUF1279), putative	ZUnknown	Tb927.10.14590	-	969	868	0.0972	0.293	-0.1287	0.936074	-0.0976	0.965	0.99	0.3785	0	0	0	0	-0.1005	-0.2105	0.044	-0.0035	1.02	0.0286
Tb927.5.2500	hypothetical protein, conserved	ZUnknown	Tb927.05.2500	+	4680	1463	-0.5705	8.86e-17	-0.2815	1	-0.3154	0.928	0.74	0.3785	0	0	0	0	1.698	1.1955	0.553	0.8442	0.82	-0.2863
Tb927.10.2350	pyruvate dehydrogenase complex E3 binding protein, putative	Mito.citric.acid.cycle	Tb927.10.02350	+	898	975	-0.2029	0.0119	0.0095	1	-0.0024	1	0.84	0.3748	0	0	0	0	-2.2048	0.8646	1.069	-0.2735	1.05	0.0704
Tb927.5.3050	poly(ADP-ribose) polymerase, putative	DNA	Tb927.05.3050	+	2509	1239	-0.1989	0.0071	-0.2229	0.796999	-0.2178	0.827	1.07	0.3748	0	0	0	0	0.527	0.4171	0.303	-0.6309	1.04	0.0566
Tb927.10.11410	hypothetical protein, conserved	ZUnknown	Tb927.10.11410	+	1383	1158	0.0489	0.565	-0.1321	1	-0.1309	0.999	0.81	0.3748	0	0	0	0	-0.1373	-0.2857	0.034	0.306	0.93	-0.1047
Tb927.9.4050	Ring finger domain/Zn-finger in ubiquitin-hydrolases and other protein, putative	ZUnknown	Tb927.09.04050	+	NA	1570	0.2465	0.000599	0.5385	0.00652047	0.186	0.916	0.81	0.3748	0	0	0	0	#N/A	0.1631	0.2	0.1365	0.87	-0.2009
Tb927.10.2920	hypothetical protein, salivarian tryp only	ZUnknown	Tb927.10.02920	+	3874	2652	0.0174	0.829	0.0774	1	0.0802	0.999	1.07	0.3711	0	0	0	0	1.3117	0.3836	0.124	0.7741	1.06	0.0841
Tb927.10.12090	RBP7A	RNA.binding	Tb927.10.12090	+	875	1174	0.0013	0.989	0.1072	1	0.0746	0.999	0.65	0.3711	0	0	0	0	0.5448	-0.3369	0.104	0.7416	1.01	0.0144
Tb927.7.5830	hypothetical protein, conserved	ZUnknown	Tb927.07.5830	+	788	534	0.0022	0.987	0.161	1	0.1511	0.999	0.85	0.3711	0	0	0	0	0.48	-0.0863	0.169	0.9887	1	0
Tb927.10.12630	hypothetical protein, conserved	ZUnknown	Tb927.10.12630	-	841	840	-0.1122	0.198	0.0846	1	0.07	0.999	0.88	0.3711	0	0	0	0	-0.2879	-0.4065	-0.074	0.0733	0.97	-0.0439
Tb927.10.7370	hypothetical protein, conserved	ZUnknown	Tb927.10.07370	-	3264	1021	0.1889	0.0287	-0.0971	1	-0.102	0.999	0.63	0.3711	0	0	0	0	-0.5096	0.243	0.126	-0.1501	0.9	-0.152
Tb927.10.14390	POB3 component of FACT complex	Chromatin	Tb927.10.14390	-	1942	3538	0.4294	1.01e-18	0.6674	0.00968133	0.5612	0.00032	1.1	0.3674	0	0	0	1	-0.6933	0.0973	-0.17	-0.312	2.2	1.1375
Tb927.8.6640	NAD(P) binding protein, putative	ZUnknown	Tb927.08.6640	-	1834	2212	-0.647	1.64e-29	-0.613	0.585591	-0.6193	0.0514	1.01	0.3674	1	0	0	0	#N/A	0.1665	0	-0.2909	1.29	0.3674
Tb927.11.13450	hypothetical protein, conserved	ZUnknown	Tb927.11.13450	-	NA	1538	-0.0438	0.587	-0.1107	1	-0.1262	0.999	0.45	0.3674	0	0	0	0	1.0105	-0.1637	-0.293	0.7711	1.15	0.2016
Tb927.10.2490	glucose-6-phosphate 1-dehydrogenase (G6PD)	Glucose.glycerol	Tb927.10.02490	+	4258	2826	-0.1504	0.0135	0.2781	0.820034	0.1777	0.495	0.91	0.3674	0	0	0	0	0.9063	0.3145	0.355	-0.3119	1.13	0.1763
Tb927.9.10000	hypothetical protein, conserved	ZUnknown	Tb927.09.10000	-	NA	478	-0.0267	0.85	-0.1648	1	-0.1929	0.986	0.42	0.3674	0	0	0	0	-0.1565	0.1007	0.145	-0.1953	1.06	0.0841
Tb927.4.4550	PuREBP1 (unpublished!)	RNA.binding	Tb927.04.4550	-	5663	4214	-0.1678	0.0167	0.2525	1	0.2194	0.989	0.85	0.3674	0	0	0	0	0.2009	1.1513	1.081	-1.2968	1.02	0.0286
Tb927.11.13570	hypothetical protein, conserved	ZUnknown	Tb927.11.13570	-	NA	618	-0.3261	0.176	-0.1887	0.972215	-0.1422	0.999	0.57	0.3674	0	0	0	0	-0.4152	-0.058	0.232	-0.6175	1.02	0.0286
Tb927.8.5140	DAG kinase	Lipids	Tb927.08.5140	+	2714	2509	-0.2886	1.56e-06	0.1119	1	0.0824	0.999	1.18	0.3674	0	0	0	0	2.2788	0.2528	-0.273	1.4185	1	0
Tb927.11.1770	hypothetical protein, conserved	ZUnknown	Tb927.11.01770	-	NA	871	0.1907	0.0225	-0.0623	1	-0.0286	0.999	1.13	0.3674	0	0	0	0	-1.2075	0.0339	0.204	-0.2672	1	0
Tb927.7.2460	hypothetical protein, conserved	ZUnknown	Tb927.07.2460	-	1674	686	-0.2592	0.00725	-0.4291	0.477006	-0.4634	0.333	1.06	0.3674	0	0	0	0	0.1439	-0.0711	0.128	0.291	0.99	-0.0145
Tb927.11.14240	CAP116 Clathrin-associated protein	Vesicular.transport	Tb927.11.14240	+	NA	1969	0.1657	0.0154	-0.163	1	-0.165	0.975	0.9	0.3674	0	0	0	0	-0.1596	-0.058	0.605	-0.3824	0.94	-0.0893
Tb927.11.14410	Ankyrin repeats (3 copies), putative	ZUnknown	Tb927.11.14410	+	NA	1414	0.2147	0.00151	0.0515	1	0.0185	0.999	1.1	0.3674	0	0	0	0	0.4767	-0.1223	-0.444	0.6655	0.89	-0.1681
Tb927.8.7970	hypothetical protein, brucei-evansi-specific	ZUnknown	Tb927.08.7970	+	2198	4424	-1.0144	2.62e-58	2.6452	1.49612e-17	2.5871	6.73e-13	1.11	0.3636	1	0	0	1	2.3518	-0.6218	-1.826	1.941	1.22	0.2869
Tb927.11.2800	hypothetical protein, conserved	ZUnknown	Tb927.11.02800	-	NA	623	-0.1739	0.144	-0.295	0.237423	-0.3078	0.171	1.23	0.3636	0	0	0	0	-0.0462	-0.3308	0.22	-0.3694	1.19	0.251
Tb927.11.16680	tRNA pseudouridine synthase D (TruD), putative	ZUnknown	Tb927.11.16680	-	NA	1032	0.0575	0.524	0.0538	1	0.054	0.999	0.45	0.3636	0	0	0	0	-0.1929	-0.1686	0.254	-0.1497	1.09	0.1243
Tb927.10.7250	hypothetical protein, conserved	ZUnknown	Tb927.10.07250	-	1584	1147	0.2781	0.000116	0.0734	1	0.0823	0.999	0.99	0.3636	0	0	0	0	-1.8812	0.3676	0.439	-0.1013	1.03	0.0426
Tb927.10.12300	hypothetical protein, conserved	ZUnknown	Tb927.10.12300	-	1201	351	0.1954	0.181	-0.0522	1	-0.0322	0.999	1.22	0.3636	0	0	0	0	-0.6273	-0.0975	0.205	-0.2317	1	0
Tb927.1.4830	Phospholipase A1	Lipids	Tb927.01.4830	+	1204	1775	0.284	0.000654	0.1597	1	0.1596	0.999	0.85	0.3636	0	0	0	0	1.3246	-0.7615	-0.241	-0.3854	0.92	-0.1203
Tb927.11.13930	U3 small nucleolar ribonucleoprotein protein IMP3, putative	rRNA.tRNA.process	Tb927.11.13930	+	NA	509	-0.2292	0.0265	-0.2795	0.71208	-0.213	0.796	1.09	0.3636	0	0	0	0	-0.416	0.654	1.488	-0.6063	0.46	-1.1203
Tb927.9.13130	hypothetical protein, conserved	ZUnknown	Tb927.09.13130	+	NA	1036	-0.0502	0.582	-0.1683	0.783667	-0.1832	0.561	1.12	0.3599	0	0	0	0	0.3036	0.0531	0.971	-0.3979	1.11	0.1506
Tb927.1.870	deoxyhypusine synthase, putative	Amino.acids	Tb927.01.0870	-	1455	1225	-0.0582	0.48	0.032	1	0.0248	0.999	1.27	0.3599	0	0	0	0	-0.4316	-0.1367	0.294	-0.4078	1.1	0.1375
Tb927.6.4130	SDH3 succinate dehydrogenase (complex II) subunit, cytochrome B subunit	Mito.e.transport	Tb927.06.4130	-	968	854	0.114	0.203	-0.1294	1	-0.1252	0.999	0.49	0.3599	0	0	0	0	-1.1719	-0.0807	0.071	-0.995	1.02	0.0286
Tb927.7.6350	NADH-ubiquinone oxidoreductase, mitochondrial, putative	Mito.e.transport	Tb927.07.6350	-	1826	978	0.2819	0.000463	0.167	1	0.1273	0.999	0.78	0.3599	0	0	0	0	-1.7754	0.345	0.3	-0.1791	0.97	-0.0439
Tb927.7.3640	hypothetical protein, conserved	ZUnknown	Tb927.07.3640	-	3092	1249	0.1632	0.0465	0.0425	1	0.0276	0.999	0.73	0.3599	0	0	0	0	-0.5769	-0.6483	-0.085	-0.0416	0.97	-0.0439
Tb927.4.1890	hypothetical protein, conserved	ZUnknown	Tb927.04.1890	-	1232	877	-0.0443	0.664	0.016	1	0.0472	0.999	0.7	0.3561	0	0	0	0	-0.2093	-0.8368	-0.518	-0.4611	1.13	0.1763
Tb927.11.2240	hypothetical protein, conserved	ZUnknown	Tb927.11.02240	+	NA	987	0.0982	0.243	0.192	1	0.158	0.999	0.88	0.3561	0	0	0	0	1.0039	-0.3784	0.458	0.2118	1.04	0.0566
Tb927.11.4920	hypothetical protein, conserved	ZUnknown	Tb927.11.04920	+	NA	1700	-0.0114	0.891	0.1235	1	0.116	0.989	0.74	0.3561	0	0	0	0	-0.1415	-0.5486	-0.947	-0.2477	1.01	0.0144
Tb927.6.4170	hypothetical protein, conserved	ZUnknown	Tb927.06.4170	-	1232	1135	-0.3031	4.52e-05	-0.0639	1	-0.0863	0.999	1.17	0.3561	0	0	0	0	0.4528	-0.191	-0.086	1.0189	1	0
Tb927.10.3200	U2 splicing auxiliary factor, putative (U2AF35)	RNA.processing	Tb927.10.03200	+	1923	2056	0.253	0.000108	0.4739	0.341801	0.5346	0.116	0.98	0.3561	0	0	0	0	0.3217	-0.0934	0.065	-0.3963	0.94	-0.0893
Tb927.3.2250	hypothetical protein, conserved	ZUnknown	Tb927.03.2250	-	902	470	0.1671	0.128	-0.1756	1	-0.1309	0.999	0.88	0.3561	0	0	0	0	0.1607	0.1709	0.914	0.3626	0.88	-0.1844
Tb927.8.5790	hypothetical protein	ZUnknown	Tb927.08.5790	+	1204	1210	-0.2388	0.000992	-0.2584	0.915304	-0.1081	0.999	0.99	0.3561	0	0	0	0	-0.4061	-0.0067	-0.076	-0.5841	0.82	-0.2863
Tb927.1.560	WD domain, G-beta repeat, putative	ZUnknown	Tb927.01.0560	-	1479	1344	0.0403	0.618	-0.099	1	-0.0885	0.999	0.89	0.3524	0	0	0	0	-1.27	-0.2747	1.052	-0.3085	1.12	0.1635
Tb927.11.16970	protein phosphatase 4, putative	Protein.phosphatase	Tb927.11.16970	-	NA	1790	-0.1202	0.0626	0.015	1	0.0319	0.999	1.14	0.3524	0	0	0	0	-0.2137	-0.1356	-0.506	-0.2255	1.07	0.0976
Tb927.11.1190	Ring finger domain/PHD-finger, putative	ZUnknown	Tb927.11.01190	+	NA	751	-0.1042	0.35	-0.0505	1	-0.0501	0.999	1	0.3524	0	0	0	0	0.5053	-0.0603	0.64	0.4767	1.07	0.0976
Tb927.11.11500	cyclin dependent kinase-binding protein, putative	Cell.cycle	Tb927.11.11500	+	NA	2475	0.205	0.000822	-0.1103	1	-0.1399	0.936	0.98	0.3524	0	0	0	0	-0.3871	0.5436	0.405	-0.1112	1.06	0.0841
Tb927.5.620	invariant surface glycoprotein, putative	ZUnknown	Tb927.05.0620	-	3505	718	-0.4493	1.67e-07	-0.1695	1	-0.2791	0.999	0.85	0.3524	0	0	0	0	1.3485	0.2449	-0.263	0.8872	1.03	0.0426
Tb927.6.2080	Mitchondrial SSU ribosomal associated KRIPP22 (PPR)	Mito.translation	Tb927.06.2080	-	1677	933	0.2228	0.00447	-0.2113	0.856	-0.1997	0.678	1.15	0.3486	0	0	0	0	-1.2158	0.171	0.168	-0.676	1.15	0.2016
Tb927.10.2440	Metacaspase MCA4	Protease	Tb927.10.02440	-	1821	3930	0.2558	0.000643	0.2681	0.997956	0.25	0.902	0.96	0.3486	0	0	0	0	2.9783	-0.9415	0.963	1.2163	1.04	0.0566
Tb927.2.4800	hypothetical protein, conserved	ZUnknown	Tb927.02.4800	-	1290	1319	0.1541	0.0478	0.0217	1	0.0151	0.999	1.13	0.3486	0	0	0	0	-1.3448	-0.349	0.387	-0.2099	1.03	0.0426
Tb927.9.11040	mitochondrial carrier protein, MCP3	Mito.transport	Tb927.09.11040	-	NA	526	-0.1629	0.141	-0.0622	1	-0.0497	0.999	0.82	0.3486	0	0	0	0	-0.436	-0.1123	0.871	-0.1076	0.9	-0.152
Tb927.10.13560	Mevalonate-diphosphate decarboxylase	Prenylation	Tb927.10.13560	-	1452	1632	0.6847	5.89e-28	-0.0277	1	-0.0476	0.999	0.94	0.3448	0	1	0	0	-1.6859	0.0077	0.156	-2.2338	1.15	0.2016
Tb927.1.780	leucine-rich repeat-containing protein	LRRP	Tb927.01.0780	-	1166	1126	-0.0417	0.648	-0.1064	1	-0.1779	0.777	1.08	0.3448	0	0	0	0	0.0191	-0.3948	0.16	0.2668	1.05	0.0704
Tb927.10.11000	4EIP2 homologue	Translation	Tb927.10.11000	-	1432	980	0.2405	0.00208	0.0951	1	0.087	0.999	0.9	0.3448	0	0	0	0	-1.1212	0.063	0.44	-0.3137	1.03	0.0426
Tb927.10.14370	hypothetical protein, conserved	ZUnknown	Tb927.10.14370	-	571	444	0.1867	0.0985	-0.1016	1	-0.0892	0.999	0.71	0.3448	0	0	0	0	-0.6211	-0.1919	0.217	-0.4816	1.02	0.0286
Tb927.8.8150	C2 domain containing protein, putative	ZUnknown	Tb927.08.8150	+	1835	923	-0.9577	2.96e-28	0.118	1	0.1435	0.999	0.59	0.3448	1	0	0	0	1.5244	-0.954	-0.892	1.8377	0.98	-0.0291
Tb927.2.4460	hypothetical protein, conserved	ZUnknown	Tb927.02.4460	-	1927	1696	0.0029	0.973	0.1447	1	0.1356	0.999	1.06	0.3448	0	0	0	0	-0.6458	0.2743	0.607	-0.5365	0.92	-0.1203
Tb927.6.5050	V-type ATPase, C subunit, putative	Lysosome	Tb927.06.5050	+	1152	2002	0.5863	1.19e-22	0.1485	1	0.097	0.999	0.82	0.341	0	1	0	0	-0.2387	-0.1148	-0.454	0.2093	1.34	0.4222
Tb927.8.5050	OTU-like cysteine protease, putative	ZUnknown	Tb927.08.5050	+	4503	2239	-0.6615	1.78e-28	0.6442	0.583038	0.5999	0.156	0.82	0.341	1	0	0	0	2.3185	0.6115	0.112	2.076	1.25	0.3219
Tb927.10.3970	hypothetical protein, conserved	ZUnknown	Tb927.10.03970	-	4571	1680	0.2128	0.018	0.6434	0.525932	0.3004	0.999	1.03	0.341	0	0	0	0	0.2492	-0.3472	0.044	0.2192	1.13	0.1763
Tb927.9.5900	glutamate dehydrogenase (GDH)	Mito.citric.acid.cycle	Tb927.09.05900	+	NA	4736	0.9049	2.15e-83	0.4309	1	0.4346	0.905	0.92	0.341	0	1	0	0	-2.6396	0.7886	0.642	-2.2212	1.13	0.1763
Tb927.8.5660	hypothetical protein, conserved	Mito.pathway	Tb927.08.5660	+	665	829	-0.0683	0.455	0.1303	1	0.1475	0.945	0.97	0.341	0	0	0	0	-0.5928	-0.1785	0.315	-0.0079	1.08	0.111
Tb927.5.2310	Phosphorylated CTD interacting factor 1 WW domain containing protein, putative	ZUnknown	Tb927.05.2310	+	2136	1960	-0.1616	0.00745	-0.1313	1	-0.1229	0.999	0.81	0.341	0	0	0	0	1.4576	0.6181	0.81	0.0131	1.08	0.111
Tb927.2.3190	Got1/Sft2-like family, putative	ZUnknown	Tb927.02.3190	+	1954	361	-0.2521	0.0412	-0.2266	0.927308	-0.1533	0.956	1.14	0.341	0	0	0	0	0.0675	-0.5786	0.292	-0.3955	1.04	0.0566
Tb927.7.550	WD domain, G-beta repeat, putative	ZUnknown	Tb927.07.0550	-	2348	1529	0.0689	0.332	0.3245	1	0.386	0.729	1.02	0.341	0	0	0	0	0.3206	0.432	0.812	0.573	1.04	0.0566
Tb927.7.300	N-acetylglucosaminyltransferase II GT15	Glycans	Tb927.07.0300	+	2803	2586	-0.1199	0.0878	0.2909	0.680946	0.0999	0.999	1	0.341	0	0	0	0	3.0395	0.5746	0.443	2.7722	1.03	0.0426
Tb927.10.4730	ribonuclease HII, putative	DNA	Tb927.10.04730	-	1629	853	-0.0409	0.689	-0.0795	1	-0.0748	0.999	0.87	0.341	0	0	0	0	-0.0906	0.1405	0.239	0.2049	1.03	0.0426
Tb927.9.7830	mitochondrial tRNA import complex, putative	Mito.biogenesis	Tb927.09.07830	-	NA	1275	0.6874	0.000148	-0.2716	1	-0.2787	0.998	0.55	0.341	0	1	0	0	-2.1435	-0.1497	0.622	-2.7083	0.97	-0.0439
Tb927.11.7040	pterin-4-alpha-carbinolamine dehydratase, putative	Folate	Tb927.11.07040	-	NA	729	0.4016	1.56e-05	0.5929	0.290175	0.5675	0.253	0.66	0.341	0	0	0	0	-0.0453	-0.0237	-0.183	-0.0419	0.9	-0.152
Tb927.11.7070	ATP-dependent DEAD/H RNA helicase, putative, no clear yeast homologue	RNA.helicase	Tb927.11.07070	-	NA	2130	0.1626	0.00606	0.0145	1	-0.0104	0.999	0.86	0.3372	0	0	0	0	1.0886	0.0349	0.36	0.2036	1.09	0.1243
Tb927.10.6600	hypothetical protein, conserved	ZUnknown	Tb927.10.06600	+	1752	1159	-0.2062	0.00611	0.1228	1	0.0688	0.999	0.87	0.3372	0	0	0	0	-0.5657	-0.3231	0.244	-0.2768	1.05	0.0704
Tb927.11.10000	KKT16 Kinetochore protein	Cell.cycle	Tb927.11.10000	+	NA	939	-0.0859	0.344	0.1915	0.70464	0.1707	0.912	0.89	0.3372	0	0	0	0	-0.3243	0.301	0.061	0.5087	1.03	0.0426
Tb927.11.13980	Outer row dynein-assembly protein 7 (ODA7)	ZUnknown	#N/A	#N/A	NA	1867	0.5519	1.17e-20	0.1413	0.845079	0.1483	0.803	0.97	0.3372	0	0	0	0	0.2319	-0.2001	0.33	-0.1581	1.02	0.0286
Tb927.11.9680	hypothetical protein, conserved	ZUnknown	Tb927.11.09680	-	NA	1139	0.0422	0.63	-0.1185	1	-0.1171	0.999	0.96	0.3372	0	0	0	0	0.4707	0.2038	0.511	0.1868	1.02	0.0286
Tb927.7.3340	Putative S-adenosyl-L-methionine-dependent methyltransferase, putative	ZUnknown	Tb927.07.3340	-	2413	1198	0.0952	0.245	-0.0595	1	-0.0791	0.999	0.62	0.3372	0	0	0	0	-0.0945	0.2501	0.043	-0.3884	1	0
Tb927.10.14930	ZC3H39	RNA.binding	Tb927.10.14930	+	4308	2174	0.2384	5.18e-05	1.9202	6.03626e-09	1.4666	0.000276	1	0.3334	0	0	0	1	-0.9435	0.6411	-0.053	0.1642	1.58	0.6599
Tb927.4.2120	hypothetical protein, conserved	ZUnknown	Tb927.04.2120	+	1561	805	0.1645	0.0537	-0.099	1	-0.1018	0.999	1.02	0.3334	0	0	0	0	-0.4428	-0.0646	0.233	0.0306	1.22	0.2869
Tb927.10.11810	hypothetical protein, conserved	ZUnknown	Tb927.10.11810	+	2188	1562	0.0172	0.835	0.0819	1	0.0531	0.999	1.09	0.3334	0	0	0	0	0.2413	-0.1657	0.006	0.2468	0.99	-0.0145
Tb927.10.13800	hypothetical protein, conserved, no yeast or human match	Cytoskeleton	Tb927.10.13800	-	3939	3020	-0.3668	8.69e-11	-0.7058	0.944016	-0.7203	0.00397	0.97	0.3296	0	0	0	0	-0.5467	0.3807	0.48	-0.574	1.25	0.3219
Tb927.10.1240	hypothetical protein, conserved	ZUnknown	Tb927.10.01240	-	1063	684	-0.1733	0.0779	-0.352	0.50042	-0.3699	0.276	0.95	0.3296	0	0	0	0	-0.9034	0.0173	0.844	-0.2052	1.2	0.263
Tb927.9.12100	Tetrapyrrole (Corrin/Porphyrin) Methylases, putative	ZUnknown	Tb927.09.12100	+	NA	931	0.2188	0.00526	0.0047	1	-0.0159	0.999	1.08	0.3296	0	0	0	0	-0.1924	-0.2304	0.129	0.1081	1.14	0.189
Tb927.11.2520	UDP-N-acetylglucosamine pyrophosphorylase, UAP	Glycans	Tb927.11.02520	-	NA	1973	-0.0529	0.442	0.0165	1	0.0115	0.999	1.09	0.3296	0	0	0	0	0.2577	-0.2103	-0.413	-0.1948	1.12	0.1635
Tb927.4.1050	IP5K kinase inositol phosphate kinase	Signalling	Tb927.04.1050	-	1587	1068	0.143	0.0745	-0.0867	1	-0.0585	0.999	0.69	0.3296	0	0	0	0	-0.3044	-0.1024	0.249	-0.116	1.11	0.1506
Tb927.8.1740	TIM62	Mito.biogenesis	Tb927.08.1740	-	2745	2093	-0.1841	0.0123	-0.2038	1	-0.2116	0.926	0.66	0.3296	0	0	0	0	-1.7754	-0.1177	0.603	-0.9958	1.06	0.0841
Tb927.5.820	hypothetical protein, conserved	ZUnknown	Tb927.05.0820	+	2003	567	-0.1367	0.221	-0.1255	1	-0.1456	0.999	0.85	0.3296	0	0	0	0	1.0718	-0.0718	0.306	0.0335	1.05	0.0704
Tb927.11.15950	amino acid transporter, putative	Amino.acid.transport	Tb927.11.15950	-	NA	6561	-0.3061	7.2e-12	0.1525	1	0.2018	0.995	0.76	0.3296	0	0	0	0	#N/A	#N/A	0.541	-0.3751	1.03	0.0426
Tb927.5.2030	hypothetical protein, conserved	ZUnknown	Tb927.05.2030	-	2517	1423	0.462	4.43e-13	0.1138	1	0.0595	0.999	0.7	0.3296	0	0	0	0	-0.1421	0.2564	-0.387	-1.6291	1	0
Tb927.8.4290	Ribosome biogenesis protein Nop16, putative	ZUnknown	Tb927.08.4290	-	1211	512	-0.4692	1.28e-05	-0.2177	1	-0.1895	0.998	0.58	0.3296	0	0	0	0	0.0959	0.0396	0.954	-0.3397	0.97	-0.0439
Tb927.11.13960	LSm4	RNA.processing	Tb927.11.13960	+	NA	396	0.1335	0.361	0.001	1	-0.0128	0.999	0.99	0.3296	0	0	0	0	-0.0606	-0.2978	0.095	0.0855	0.95	-0.074
Tb927.8.6410	short-chain dehydrogenase, putative	Mito.pathway	Tb927.08.6410	+	1786	818	-0.306	0.000213	-0.5354	0.0239435	-0.5349	0.0222	1.03	0.3296	0	0	0	0	-1.6897	-0.0603	0.361	-1.6175	0.88	-0.1844
Tb927.9.2670	POMP3	Mito.membrane	Tb927.09.02670	-	NA	1616	0.0498	0.489	0.1422	1	0.1385	0.965	0.93	0.3258	0	0	0	0	-0.2198	-0.558	-0.11	0.2253	1.09	0.1243
Tb927.5.3700	hypothetical protein, conserved	ZUnknown	Tb927.05.3700	+	1227	1330	0.2318	0.0017	0.0383	1	0.0457	0.999	1.02	0.3258	0	0	0	0	-0.6749	0.2547	0.21	0.1485	1.08	0.111
Tb927.9.15010	NADH-ubiquinone oxidoreductase complex I subunit, putative	Mito.e.transport	Tb927.09.15010	+	NA	1086	0.1363	0.0924	0.0247	1	0.0121	0.999	0.72	0.3258	0	0	0	0	-0.9443	-0.4143	0.61	-0.4091	1.06	0.0841
Tb927.5.2650	L-galactonolactone oxidase (GAL/ALO)	Enzyme	Tb927.05.2650	+	2245	1026	-0.3246	2.93e-05	-0.5482	0.3044	-0.5731	0.0409	1.15	0.3258	0	0	0	0	0.395	0.2207	0.868	-0.4311	1.03	0.0426
Tb927.1.4160	hypothetical protein, conserved	ZUnknown	Tb927.01.4160	+	835	704	0.2208	0.0177	0.0648	1	0.0468	0.999	1.09	0.3258	0	0	0	0	-0.518	-0.3525	0.498	-0.6266	1.03	0.0426
Tb927.11.12040	component of cytochrome c oxidase complex	Mito.e.transport	Tb927.11.12040	+	NA	956	0.8156	1.39e-19	0.0555	1	0.0408	0.999	0.44	0.3258	0	1	0	0	-2.2753	-0.1163	0.483	-1.6518	0.99	-0.0145
Tb927.11.12350	DNA photolyase, putative	DNA	Tb927.11.12350	+	NA	1383	0.2177	0.00173	-0.055	1	-0.0628	0.999	0.49	0.3219	0	0	0	0	-0.0219	0.4446	0.477	-0.022	1.07	0.0976
Tb927.2.5190	HOP2 putative homologue, involved in meiosis?	DNA	Tb927.02.5190	+	981	466	0.283	0.00704	-0.3633	0.667994	-0.3552	0.534	1.18	0.3219	0	0	0	0	-0.8199	-0.0843	0.836	-1.4491	1	0
Tb927.7.5340	CARP3	Signalling	Tb927.07.5340	+	6553	5307	1.0477	2.57e-113	2.1758	8.65332e-06	2.0767	4.34e-05	1.03	0.3181	0	1	0	1	1.3191	0.6812	-0.037	0.1736	1.31	0.3896
Tb927.11.14080	CYC2, G1 cyclin	Cell.cycle	Tb927.11.14080	+	NA	1181	-0.2708	0.000213	0.2858	1	0.5161	0.755	0.91	0.3181	0	0	0	0	1.0197	0.3051	-0.052	0.329	1.26	0.3334
Tb927.8.7290	Regulator of chromosome condensation (RCC1) repeat, putative	ZUnknown	Tb927.08.7290	+	1905	600	-0.0554	0.634	-0.3481	0.98733	-0.3138	0.67	0.7	0.3181	0	0	0	0	-0.3616	0.3053	-0.254	-0.4424	1.18	0.2388
Tb927.9.12810	poly(ADP-ribose) glycohydrolase, putative	DNA	Tb927.09.12810	+	NA	914	0.1042	0.271	-0.1167	1	-0.1156	0.917	1.17	0.3181	0	0	0	0	0.1823	-0.0235	0.419	0.0466	1.08	0.111
Tb927.10.1270	mismatch repair protein MSH4	DNA	Tb927.10.01270	-	3732	2574	-0.1563	0.00651	-0.199	1	-0.1939	0.936	0.79	0.3181	0	0	0	0	-0.0447	0.3351	-0.071	-0.0445	1.03	0.0426
Tb927.1.1020	leucine-rich repeat-containing protein	LRRP	Tb927.01.1020	+	2069	1405	0.0812	0.287	0.0411	1	0.0304	0.999	0.97	0.3181	0	0	0	0	0.1871	0.2242	0.032	0.2233	1.02	0.0286
Tb927.5.4520	KKIP1 Kinetochore interacting protein 1	Cell.cycle	Tb927.05.4520	-	2940	3071	0.0952	0.141	0.1319	1	0.1282	0.999	0.25	0.3181	0	0	0	0	1.1481	-0.4357	-0.422	-0.5616	1	0
Tb927.2.3800	GRBC2 mRNA processing protein, putative GAP1 MRB complex protein	Mito.RNA	Tb927.02.3800	-	3777	2525	-0.2817	6.14e-07	-0.2808	1	-0.2557	0.86	1.02	0.3181	0	0	0	0	-0.6124	0.2275	-0.334	-0.6279	0.99	-0.0145
Tb927.10.5860	hypothetical protein, conserved	ZUnknown	Tb927.10.05860	-	1028	787	0.0614	0.545	0.0225	1	0.0166	0.999	0.58	0.3181	0	0	0	0	0.0658	-0.4425	-0.283	-0.0628	0.98	-0.0291
Tb927.8.690	peptidyl-prolyl cis-trans isomerase/rotamase, putative,PPIase, putative (PIN1)	Chaperone	Tb927.08.0690	-	1416	667	-0.7014	1.78e-12	-0.2093	1	-0.2377	0.887	0.55	0.3181	1	0	0	0	-0.2253	-0.8506	-0.51	-0.6134	0.94	-0.0893
Tb927.11.2850	hypothetical protein, conserved	ZUnknown	Tb927.11.02850	-	NA	157	-0.0031	0.99	0.821	0.606078	1.4253	0.00347	0.27	0.3181	0	0	0	0	#N/A	#N/A	0.46	0.9629	0.53	-0.9159
Tb927.9.6620	hypothetical protein, conserved	Mito.pathway	Tb927.09.06620	+	NA	482	0.811	2.1e-13	-0.2439	0.966321	-0.3359	0.0377	1.02	0.3142	0	1	0	0	-1.9799	0.8213	0.241	-1.599	2.07	1.0496
Tb927.6.4940	RF-1 domain containing protein, putative	ZUnknown	Tb927.06.4940	+	1460	1476	0.0077	0.934	0.0294	1	0.0079	0.999	0.73	0.3142	0	0	0	0	0.1418	-0.1212	0.048	-0.0847	1.07	0.0976
Tb927.3.1770	leucine-rich repeat protein (LRRP)	LRRP	Tb927.03.1770	-	2914	2460	-0.0118	0.878	0.0623	1	0.0631	0.999	1.01	0.3142	0	0	0	0	0.763	0.2317	-0.08	0.6379	1.04	0.0566
Tb927.10.15410	glycosomal malate dehydrogenase (gMDH)	Glucose.glycerol	Tb927.10.15410	+	2380	1140	-0.0426	0.642	-0.2379	1	-0.2503	0.995	0.76	0.3142	0	0	0	0	-4.772	0.4709	-0.512	-2.6674	0.96	-0.0589
Tb927.10.1430	hypothetical protein, conserved	ZUnknown	Tb927.10.01430	-	1007	1544	-0.0559	0.456	0.0667	1	0.1693	0.956	0.87	0.3142	0	0	0	0	0.5479	0.2515	-0.161	1.1094	0.92	-0.1203
Tb927.6.1920	hypothetical protein, conserved	ZUnknown	Tb927.06.1920	-	3298	1618	0.1921	0.00308	0.311	0.939837	0.1891	0.999	1.16	0.3103	0	0	0	0	0.145	0.637	0.036	0.5096	1.62	0.696
Tb927.4.990	hypothetical protein, conserved	ZUnknown	Tb927.04.0990	-	1209	648	-0.5727	5.83e-11	-0.3908	0.197472	-0.4032	0.478	1.02	0.3103	0	0	0	0	0.0987	-0.1101	0.124	0.1591	1.31	0.3896
Tb927.10.15600	FKBP-type peptidyl-prolyl cis-trans isomerase, conserved	Chaperone	Tb927.10.15600	+	1923	609	0.3653	0.00021	-0.1515	1	-0.1581	0.651	1.11	0.3103	0	0	0	0	0.0966	0.2935	0.084	-0.1349	1.15	0.2016
Tb927.10.1150	hypothetical protein, conserved	ZUnknown	Tb927.10.01150	-	3149	2576	0.0247	0.734	0.2913	0.835531	0.3013	0.622	0.84	0.3103	0	0	0	0	0.7307	0.4695	0.405	0.3948	1.15	0.2016
Tb927.11.390	SPRY domain containing protein, putative	ZUnknown	Tb927.11.00390	-	NA	1863	0.1944	0.00245	0.2723	0.818738	0.2536	0.57	0.85	0.3103	0	0	0	0	0.4998	0.1096	-0.118	0.3331	1.1	0.1375
Tb927.11.3130	glycosomal transporter (GAT2)	Glycosome	Tb927.11.03130	-	NA	2391	-0.0744	0.218	-0.1586	1	-0.1649	0.999	0.84	0.3103	0	0	0	0	-0.1167	0.3904	0.251	-0.7674	1.09	0.1243
Tb927.9.9990	kinetoplastid-specific dual specificity phosphatase, putative	Phosphatase	Tb927.09.09990	-	NA	718	0.1631	0.0761	0.0589	1	0.0764	0.999	1.05	0.3103	0	0	0	0	0.434	0.044	0.094	-0.217	1.07	0.0976
Tb927.6.650	hypothetical protein, conserved	ZUnknown	Tb927.06.0650	-	7350	6197	-0.0379	0.461	-0.0853	1	-0.0907	0.999	0.74	0.3103	0	0	0	0	0.4849	0.4815	0.628	0.4442	1.06	0.0841
Tb927.5.1760	Isoprenylcysteine alpha-carbonyl methylesterase, putative	ZUnknown	Tb927.05.1760	+	2193	4427	-0.8392	3.04e-64	0.621	0.181233	0.5739	0.245	0.67	0.3103	1	0	0	0	1.7624	1.1378	0.332	0.5548	1.05	0.0704
Tb927.9.5330	Putative papain-like cysteine peptidase (DUF1796), putative	ZUnknown	Tb927.09.05330	+	NA	1238	0.0742	0.348	-0.4031	0.124029	-0.4006	0.24	0.89	0.3065	0	0	0	0	-0.6762	-0.3124	0.535	-0.4377	1.3	0.3785
Tb927.8.2490	SET20	ZUnknown	Tb927.08.2490	+	1167	839	0.4559	3.32e-07	0.0218	1	0.0255	0.999	0.77	0.3065	0	0	0	0	0.2004	-0.1506	0.783	-0.4739	1.14	0.189
Tb927.11.8940	LDK protein kinase	Protein.kinase	Tb927.11.08940	+	NA	1138	0.1745	0.0308	-0.0406	1	-0.0584	0.999	0.61	0.3065	0	0	0	0	0.1903	0.3836	0.242	0.3721	1.13	0.1763
Tb927.3.5380	Tubulin-tyrosine ligase family, putative	ZUnknown	Tb927.03.5380	+	2027	1621	0.2727	2.63e-05	0.1697	1	0.1584	0.999	1	0.3065	0	0	0	0	0.3476	-0.2862	-0.313	-0.228	1.06	0.0841
Tb927.4.740	Rgp1, putative	ZUnknown	Tb927.04.0740	-	1463	1785	-0.3655	8.15e-10	-0.4278	0.300734	-0.4314	0.235	1.15	0.3065	0	0	0	0	-1.2248	0.193	0.274	-0.4331	1.01	0.0144
Tb927.10.5590	protein phosphatase 2C, putative	Protein.phosphatase	Tb927.10.05590	+	1852	1429	0.2605	0.000109	-0.2548	0.918341	-0.2621	0.339	0.88	0.3065	0	0	0	0	-0.4985	0.2109	0.383	-0.8254	1	0
Tb927.1.2760	hypothetical protein	ZUnknown	Tb927.01.2760	+	522	445	-1.6444	3.01e-48	-1.322	7.1965e-08	-1.2505	5.29e-09	0.45	0.3065	1	0	1	0	0.0492	-0.0228	-0.325	-0.2115	0.99	-0.0145
Tb927.11.4620	hypothetical protein, conserved	ZUnknown	Tb927.11.04620	+	NA	1915	-0.3027	0.0755	0.6893	0.939838	0.9965	0.311	0.76	0.3065	0	0	0	0	0.1654	-0.0281	-0.668	0.6281	0.98	-0.0291
Tb927.3.5660	GnT11 UDP-GlcNAc:α3-D-mannoside β1–2-N-acetylglucosaminyltransferase I	Glycans	Tb927.03.5660	+	2552	993	-1.2314	2.09e-49	-1.1958	0.181528	-1.1844	0.0659	0.91	0.3065	1	0	0	0	2.072	0.3898	0.102	1.7884	0.92	-0.1203
Tb927.8.5890	Anti-silencing function ASF1B	Chromatin	Tb927.08.5890	+	802	661	0.1032	0.313	0.0134	1	-0.013	0.999	1.04	0.3026	0	0	0	0	0.2028	-0.421	0.382	-0.2702	1.47	0.5558
Tb927.10.640	arginine N-methyltransferase, type II (PRMT5)	Arg.methylation	Tb927.10.00640	+	2761	2407	0.0583	0.368	-0.0474	1	-0.0567	0.999	0.78	0.3026	0	0	0	0	-0.5504	-0.3474	0.218	-0.3836	1.22	0.2869
Tb927.9.11520	hypothetical protein, conserved	ZUnknown	Tb927.09.11520	+	NA	975	0.1831	0.0226	0.0199	1	0.0294	0.999	0.67	0.3026	0	0	0	0	-0.3345	0.0851	0.273	0.1478	1.19	0.251
Tb927.10.3740	hypothetical protein, conserved	ZUnknown	Tb927.10.03740	-	1578	939	0.1244	0.176	0.0976	1	0.0792	0.999	0.7	0.3026	0	0	0	0	-0.9319	-0.113	0.106	0.0002	1.14	0.189
Tb927.8.6120	hypothetical protein, conserved	ZUnknown	Tb927.08.6120	+	1087	893	-0.2389	0.0033	0.1021	1	0.0885	0.999	0.71	0.3026	0	0	0	0	-0.4195	0.1268	-0.052	0.3868	1.1	0.1375
Tb927.3.1330	hypothetical protein, conserved	ZUnknown	Tb927.03.1330	+	4327	3204	0.2214	0.000448	0.0857	1	0.0785	0.999	0.52	0.3026	0	0	0	0	0.4966	0.4023	0.54	0.0696	1.07	0.0976
Tb927.9.12750	hypothetical protein, conserved	ZUnknown	Tb927.09.12750	+	NA	1234	-0.0663	0.411	0.0746	1	0.0274	0.999	0.94	0.3026	0	0	0	0	0.6817	-0.1051	-0.083	-0.3031	1.02	0.0286
Tb927.9.13110	hypothetical protein, conserved	ZUnknown	Tb927.09.13110	+	NA	1366	-0.0567	0.457	0.0923	1	0.081	0.999	0.78	0.3026	0	0	0	0	0.2599	0.2165	-0.243	-0.2667	0.99	-0.0145
Tb927.1.1350	kinesin heavy chain, Kinesin-1	Cytoskeleton	Tb927.01.1350	+	2661	2693	0.3091	7.41e-09	0.3706	0.998401	0.3035	0.689	0.8	0.2987	0	0	0	0	0.5872	0.2433	0.03	-0.3544	1.22	0.2869
Tb927.9.6310	ABC transporter, putative	Transporter	Tb927.09.06310	+	NA	2747	0.2319	2.1e-05	0.2953	0.829992	0.1674	0.999	0.81	0.2987	0	0	0	0	-0.9242	0.9513	0.053	-1.0398	1.16	0.2141
Tb927.7.5480	dihydrofolate reductase-thymidylate synthase (DHFR-TS)	Folate	Tb927.07.5480	+	2730	1961	-0.4545	1.45e-15	-0.0085	1	0.0052	0.999	1.1	0.2987	0	0	0	0	-0.2533	-0.1961	-0.511	0.1466	1.06	0.0841
Tb927.10.1660	hypothetical protein, conserved	Mito.pathway	Tb927.10.01660	-	958	606	0.2994	0.00277	-0.1535	1	-0.1993	0.832	0.88	0.2987	0	0	0	0	-1.1762	-0.1029	0.068	-0.965	1.03	0.0426
Tb927.6.4230	hypothetical protein, conserved	ZUnknown	Tb927.06.4230	-	1530	1557	0.0195	0.814	-0.19	0.870771	-0.1893	0.712	1.01	0.2987	0	0	0	0	-1.1046	0.0401	0.692	0.5282	0.98	-0.0291
Tb927.2.3340	hypothetical protein	ZUnknown	Tb927.02.3340	-	673	289	-3.1088	2.35e-96	-2.1594	6.48312e-06	-2.1777	1.96e-08	0.96	0.2947	1	0	1	0	#N/A	-0.7489	-0.45	2.6459	1.18	0.2388
Tb927.10.9920	hypothetical protein, conserved	ZUnknown	Tb927.10.09920	+	2085	712	-0.2787	0.0035	-0.3768	0.789515	-0.3746	0.378	0.98	0.2947	0	0	0	0	-0.3744	0.3471	1.558	-0.5661	1.05	0.0704
Tb927.8.6290	hypothetical protein, conserved	ZUnknown	Tb927.08.6290	+	1966	1427	0.1916	0.006	0.0156	1	-0.0047	0.999	0.88	0.2947	0	0	0	0	-0.9571	0.0732	0.426	-0.0325	0.97	-0.0439
Tb927.3.3250	hypothetical protein, conserved	ZUnknown	Tb927.03.3250	-	1228	642	-0.1162	0.284	-0.1513	1	-0.1944	0.999	0.6	0.2947	0	0	0	0	-0.6301	-0.1928	0.24	0.5639	0.93	-0.1047
Tb927.6.2590	hypothetical protein, conserved	ZUnknown	Tb927.06.2590	+	1236	356	0.3992	0.000869	0.0976	1	0.0092	0.999	1.01	0.2908	0	0	0	0	-0.4815	0.0315	0.763	-0.2375	1.12	0.1635
Tb927.7.870	hypothetical protein, conserved	ZUnknown	Tb927.07.0870	-	1372	678	0.1903	0.0425	-0.0443	1	-0.0378	0.999	1	0.2908	0	0	0	0	-0.5849	-0.1191	0.384	0.3028	1.12	0.1635
Tb927.10.12020	recA bacterial DNA recombination protein, putative	ZUnknown	Tb927.10.12020	+	1407	1070	0.1771	0.0265	0.0361	1	0.0255	0.999	0.88	0.2908	0	0	0	0	-1.3764	-0.5501	0.213	-0.1943	1.01	0.0144
Tb927.11.13230	TbVAP, flagellar attachment zone	Cytoskeleton	Tb927.11.13230	-	NA	2261	0.0599	0.383	0.9164	0.00611591	0.8378	0.0113	0.65	0.2869	0	0	0	1	0.5369	0.2851	-0.804	-0.0573	1.16	0.2141
Tb927.11.15230	cytosolic coat protein, putative	Vesicular.transport	Tb927.11.15230	-	NA	1834	0.3147	1.36e-05	0.0906	1	0.0793	0.999	0.55	0.2869	0	0	0	0	0.1264	-0.1823	0.093	-0.0989	1.15	0.2016
Tb927.10.10980	heat shock protein 83, HSP83	Chaperone	Tb927.10.10980	-	2629	70528	0.1919	4.63e-05	0.083	1	-0.8046	0.999	0.81	0.2869	0	0	0	0	-0.2767	-0.5109	-0.501	-1.2329	1.11	0.1506
Tb927.1.1200	Mitochondrial ribosomal protein S15	Mito.translation	Tb927.01.1200	+	2337	1199	0.0703	0.378	-0.0859	1	-0.0778	0.989	1.12	0.2869	0	0	0	0	-0.4896	0.1496	0.96	-0.8487	1.1	0.1375
Tb927.8.2440	hypothetical protein, conserved	ZUnknown	Tb927.08.2440	+	827	633	0.2768	0.00337	0.0848	1	0.095	0.999	0.42	0.2869	0	0	0	0	0.3042	-0.2276	0.046	0.4975	1.08	0.111
Tb927.11.16770	glucosamine-6-phosphate isomerase, putative	Glucose.glycerol	Tb927.11.16770	-	NA	1141	0.2027	0.0132	0.224	0.958267	0.2135	0.862	1.12	0.2869	0	0	0	0	0.2778	-0.4618	0.174	0.0165	1.05	0.0704
Tb927.7.1450	Conserved hypothetical ATP binding protein, putative	ZUnknown	Tb927.07.1450	+	1677	871	0.2637	0.00274	0.048	1	0.057	0.999	1	0.2869	0	0	0	0	-0.9446	0.3089	0.215	-0.2259	1.05	0.0704
Tb927.11.12570	kinetoplastid-specific dual specificity phosphatase, putative	Phosphatase	Tb927.11.12570	+	NA	952	0.3163	6.28e-05	0.0384	1	0.0472	0.999	0.72	0.2869	0	0	0	0	-0.399	-0.3561	0.327	0.2975	1.02	0.0286
Tb927.10.9440	NADH dehydrogenase (54 NDH2) in TAO/G3PDH complex	Mito.e.transport	Tb927.10.09440	+	3439	2146	-0.6378	1.7e-25	-0.5692	0.901092	-0.5712	0.194	1	0.2869	1	0	0	0	-0.5605	0.6042	0.201	-0.7392	1.01	0.0144
Tb927.7.4840	hypothetical protein, conserved	ZUnknown	Tb927.07.4840	-	1302	670	-0.1106	0.277	0.0641	1	0.0447	0.999	0.96	0.2869	0	0	0	0	-0.4151	-0.1712	0.096	0.0346	0.81	-0.304
Tb927.9.12160	hypothetical protein, conserved	ZUnknown	Tb927.09.12160	+	NA	1840	0.0327	0.657	-0.2667	0.787305	-0.2787	0.526	0.91	0.2829	0	0	0	0	-0.3765	-0.2779	-0.112	-0.6105	1.22	0.2869
Tb927.9.1560	hypothetical protein, conserved, DNAj domain	Chaperone	Tb927.09.01560	-	NA	2059	0.3432	1.94e-09	0.2358	0.568779	0.2076	0.697	1.02	0.2829	0	0	0	0	-0.2747	-0.4157	0.727	-1.0271	1.17	0.2265
Tb927.11.16040	prefoldin subunit, putative	ZUnknown	Tb927.11.16040	-	NA	923	-0.0346	0.784	-0.1681	1	-0.18	0.862	1.01	0.2829	0	0	0	0	0.2539	0.4837	0.332	-0.0398	1.09	0.1243
Tb927.9.12380	Histidine phosphatase superfamily (branch 1), putative	ZUnknown	Tb927.09.12380	+	NA	1614	0.1	0.165	0.0888	1	0.0562	0.999	0.75	0.2829	0	0	0	0	0.5287	-0.0688	0.099	0.8423	1.09	0.1243
Tb927.10.10890	heat shock protein 83, HSP83	Chaperone	Tb927.10.10890	-	2628	70296	0.1975	5.7e-05	0.0915	1	0.0909	0.999	0.84	0.2829	0	0	0	0	#N/A	-0.5108	-0.453	-1.2492	1.08	0.111
Tb927.10.14520	BBP52	Cytoskeleton	Tb927.10.14520	-	1717	2074	-0.187	0.00347	-0.1167	1	-0.1199	0.832	0.89	0.2829	0	0	0	0	-0.8106	-0.5632	-0.129	-0.2078	1.06	0.0841
Tb927.7.5590	Domain of unknown function (DUF3883), putative	ZUnknown	Tb927.07.5590	+	5777	3845	-0.4792	9.76e-25	-0.2827	0.921533	-0.3016	0.775	0.37	0.2829	0	0	0	0	0.9642	0.6848	0.978	-0.1092	1.04	0.0566
Tb927.7.770	Ring finger domain containing protein, putative	ZUnknown	Tb927.07.0770	-	2129	816	0.0629	0.515	-0.08	1	-0.0463	0.999	0.71	0.2829	0	0	0	0	-0.6673	0.0224	0.032	0.0154	1.03	0.0426
Tb927.11.11040	hypothetical protein, conserved	ZUnknown	Tb927.11.11040	+	NA	628	0.0522	0.633	-0.0964	1	-0.0933	0.999	1	0.2829	0	0	0	0	-0.107	-0.8885	-0.42	-0.1262	0.88	-0.1844
Tb927.8.3740	pterin 4 alpha carbinolamine dehydratase, putative	Enzyme	Tb927.08.3740	-	875	878	-0.005	0.962	0.3627	0.62883	0.3517	0.534	1.16	0.279	0	0	0	0	0.8843	-0.2208	-0.256	1.0683	1.51	0.5945
Tb927.10.9700	FAZ22	Cytoskeleton	Tb927.10.09700	+	3984	4781	0.0974	0.0571	0.1249	1	0.1704	0.999	0.83	0.279	0	0	0	0	1.8069	0.7422	-0.372	0.3283	1.12	0.1635
Tb927.7.4050	hypothetical protein, conserved	ZUnknown	Tb927.07.4050	+	2535	2294	0.1864	0.00231	-0.0037	1	-0.0045	0.999	0.89	0.279	0	0	0	0	-0.4215	0.1444	0.452	-0.0578	1	0
Tb927.6.2920	hypothetical protein, conserved	ZUnknown	Tb927.06.2920	+	2283	1336	-0.0608	0.456	-0.0868	1	-0.1033	0.999	1.15	0.279	0	0	0	0	0.0727	-0.0617	0.382	0.3891	0.98	-0.0291
Tb927.10.4870	tRNA-dihydrouridine synthase 2, putative	rRNA.tRNA.process	Tb927.10.04870	-	2326	905	-0.0479	0.65	-0.0986	1	-0.1446	0.98	0.76	0.275	0	0	0	0	-1.3903	0.0383	-0.444	-0.6633	1	0
Tb927.10.6340	hypothetical protein, conserved	ZUnknown	Tb927.10.06340	-	1712	1084	-0.0534	0.558	-0.0063	1	0.0168	0.999	0.95	0.275	0	0	0	0	-0.4053	0.0249	-0.188	0.3631	0.95	-0.074
Tb927.11.460	predicted WD40 repeat protein	ZUnknown	Tb927.11.00460	-	NA	2426	-0.3071	6.12e-08	-0.2281	1	-0.1992	0.982	0.8	0.271	0	0	0	0	-0.3689	0.6032	1.302	-0.6108	1.17	0.2265
Tb927.11.320	Potential LC8 homologue (dynein light chain associated to multiple functions in other species such as flagellum beating and formation)	Cytoskeleton	Tb927.11.00320	-	NA	745	0.2265	0.0127	0.1594	1	0.1817	0.999	0.56	0.271	0	0	0	0	0.4621	-0.5195	-0.39	-0.2887	1.05	0.0704
Tb927.11.190	elongation factor, putative	Translation	Tb927.11.00190	-	NA	2551	0.1121	0.0642	-0.007	1	0.0055	0.999	1.03	0.271	0	0	0	0	-0.7898	-0.036	-0.713	-1.051	0.99	-0.0145
Tb927.9.6070	40S ribosomal protein S3	Ribosome	Tb927.09.06070	+	NA	18514	-0.1881	4.91e-05	-0.3351	0.349422	-0.3616	0.534	0.85	0.271	0	0	0	0	#N/A	#N/A	0.608	-0.9766	0.99	-0.0145
Tb927.1.1080	TFIIH basal transcription factor subunit (TSP1)	RNA.synthesis	Tb927.01.1080	+	1529	986	0.2409	0.00232	-0.0281	1	-0.0227	0.999	0.95	0.271	0	0	0	0	-0.5968	-0.0124	0.054	0.3777	0.87	-0.2009
Tb927.7.1530	2OG-Fe(II) oxygenase superfamily, putative	ZUnknown	Tb927.07.1530	+	1421	1249	0.1454	0.0661	0.0151	1	-0.0339	0.999	0.96	0.267	0	0	0	0	0.1228	-0.2836	0.154	0.0884	1.91	0.9336
Tb927.10.5980	leucine-rich repeat protein (LRRP)	LRRP	Tb927.10.05980	-	2360	1621	-0.1032	0.139	0.1337	1	0.0737	0.999	0.77	0.267	0	0	0	0	0.6886	-0.0273	-0.181	0.0008	1.25	0.3219
Tb927.10.5520	AmmeMemoRadiSam system protein B, putative	ZUnknown	Tb927.10.05520	+	2158	1989	0.3888	1.02e-10	0.1521	1	0.1243	0.999	0.94	0.267	0	0	0	0	0.1808	-0.5294	0.253	-0.3839	1.2	0.263
Tb927.4.3540	conserved, found in PRP19 pull-down	RNA.processing	Tb927.04.3540	-	1367	1078	0.0212	0.827	-0.0419	1	-0.0413	0.999	0.71	0.267	0	0	0	0	-0.0978	-0.144	0.116	0.258	1.13	0.1763
Tb927.2.2580	hypothetical protein, conserved	ZUnknown	Tb927.02.2580	-	4652	2802	-0.1612	0.00278	0.0442	1	0.0415	0.999	0.66	0.267	0	0	0	0	1.3135	0.9165	0.047	0.689	1.07	0.0976
Tb927.9.3490	hypothetical protein, conserved	ZUnknown	Tb927.09.03490	+	NA	685	0.1742	0.0662	-0.0715	1	0.0007	1	0.91	0.267	0	0	0	0	1.1666	0.2934	0.335	0.8579	1.06	0.0841
Tb927.6.4360	hypothetical protein, conserved	ZUnknown	Tb927.06.4360	-	1008	337	-0.203	0.118	-0.2597	0.681444	-0.3258	0.457	0.94	0.267	0	0	0	0	-1.5052	-0.3125	0.654	-0.1968	1.01	0.0144
Tb927.10.9090	Cullin binding, putative	Ubiquitin.proteasome	Tb927.10.09090	+	2594	630	0.0942	0.374	-0.0974	1	-0.0987	0.999	0.96	0.267	0	0	0	0	0.0454	-0.0818	0.254	0.331	0.97	-0.0439
Tb927.9.8710	hypothetical protein, conserved	ZUnknown	Tb927.09.08710	-	NA	473	0.2022	0.0838	0.0481	1	0.0328	0.999	1.09	0.263	0	0	0	0	-0.0487	-0.0509	0.084	-0.0648	1.19	0.251
Tb927.7.5510	hypothetical protein, conserved	ZUnknown	Tb927.07.5510	+	1508	612	-0.0473	0.674	-0.0743	1	-0.0433	0.999	0.63	0.263	0	0	0	0	0.0278	-0.29	0.496	0.4994	1.14	0.189
Tb927.11.16020	DRBD10	RNA.binding	Tb927.11.16020	-	NA	1321	-0.2531	0.00167	-0.277	0.681444	-0.2716	0.637	0.7	0.263	0	0	0	0	-0.2339	0.5052	0.566	-0.444	1.05	0.0704
Tb927.7.4120	hypothetical protein, conserved, no domains, K-specific	ZUnknown	Tb927.07.4120	+	2277	2865	-0.2269	0.000115	0.0999	1	0.0874	0.999	0.78	0.263	0	0	0	0	0.0037	0.1569	0.429	-0.3795	1.03	0.0426
Tb927.10.6950	sterol 24-c-methyltransferase, putative	Sterols	Tb927.10.06950	+	2403	2271	0.0759	0.289	-0.0375	1	-0.1293	0.999	0.8	0.263	0	0	0	0	-2.7891	0.6067	0.295	-0.8006	0.99	-0.0145
Tb927.8.900	splicing factor TSR1 (TSR1)	RNA.processing	Tb927.08.0900	-	4030	1991	-0.7221	1.33e-19	-0.1143	1	0.0375	0.999	0.71	0.263	1	0	0	0	-0.4981	0.452	0.036	-0.498	0.96	-0.0589
Tb927.10.16030	MAPK2 protein kinase	Protein.kinase	Tb927.10.16030	+	1201	903	0.0398	0.702	-0.1427	1	-0.1142	0.999	0.94	0.259	0	0	0	0	0.6595	-0.0384	0.701	0.3862	1.18	0.2388
Tb927.11.11730	MRP protein, putative	Transporter	Tb927.11.11730	+	NA	1013	0.2461	0.00145	0.0422	1	0.0336	0.999	0.93	0.259	0	0	0	0	1.092	0.028	0.583	-0.0028	1.1	0.1375
Tb927.8.2670	Putative S-adenosyl-L-methionine-dependent methyltransferase, putative	Mito.pathway	Tb927.08.2670	+	1301	1145	0.2976	6.83e-05	0.0662	1	0.0547	0.999	1.09	0.259	0	0	0	0	0.1641	0.157	0.31	-0.159	1.04	0.0566
Tb927.1.4400	hypothetical protein, conserved	ZUnknown	Tb927.01.4400	+	890	970	0.2633	0.00218	0.3018	0.619731	0.3178	0.568	1.15	0.259	0	0	0	0	0.1931	-0.245	-0.004	0.2173	0.86	-0.2176
Tb927.7.5130	hypothetical protein, conserved	ZUnknown	Tb927.07.5130	+	1199	551	0.2523	0.0425	-0.1012	1	-0.1489	0.717	0.98	0.255	0	0	0	0	-1.3864	-0.3259	-0.024	-1.1182	1.07	0.0976
Tb927.11.4000	hypothetical protein, conserved	ZUnknown	Tb927.11.04000	+	NA	2175	-0.2793	1.51e-06	-0.0773	1	-0.0726	0.999	0.86	0.255	0	0	0	0	0.3757	-0.0986	-0.684	-0.0349	1.05	0.0704
Tb927.10.3660	aspartate aminotransferase	Amino.acids	Tb927.10.03660	-	1696	4711	-0.0003	0.996	1.1771	0.591388	1.1421	0.185	0.97	0.255	0	0	0	0	0.0562	0.6077	0.086	1.6444	1.03	0.0426
Tb927.8.1950	hypothetical protein, conserved	ZUnknown	Tb927.08.1950	+	3103	3172	-0.1211	0.0217	-0.1501	0.862295	-0.1545	0.891	0.94	0.255	0	0	0	0	0.4463	0.4016	0.296	-0.9203	1.03	0.0426
Tb927.11.6210	sterol 14-alpha-demethylase (CYP51)	Sterols	Tb927.11.06210	-	NA	936	-0.4941	2.09e-10	-0.547	0.816214	-0.5191	0.141	0.79	0.255	0	0	0	0	-2.7616	0.5618	1.177	-0.8392	1.01	0.0144
Tb927.11.5990	LSU ribosomal protein, mitochondrial, putative	Mito.translation	Tb927.11.05990	-	NA	1180	-0.5291	9.08e-13	-0.3483	0.565849	-0.3541	0.177	0.94	0.255	0	0	0	0	0.2794	0.0647	0.686	0.11	0.98	-0.0291
Tb927.11.5870	hypothetical protein, conserved	ZUnknown	Tb927.11.05870	+	NA	571	-0.1854	0.065	-0.192	1	-0.1882	0.623	0.8	0.255	0	0	0	0	0.6247	0.2006	-0.11	-0.056	0.98	-0.0291
Tb927.11.5760	hypothetical protein, conserved	ZUnknown	Tb927.11.05760	+	NA	437	0.37	0.00112	-0.1547	1	-0.1328	0.995	1.02	0.255	0	0	0	0	-1.217	-0.0219	0.972	-0.5546	0.97	-0.0439
Tb927.11.15920	glutathione peroxidase, putative (PxIV)	Redox	Tb927.11.15920	-	NA	588	0.1641	0.127	0.2359	0.798795	0.2662	0.824	1.01	0.255	0	0	0	0	-0.4208	-0.3413	0.243	-0.3669	0.92	-0.1203
Tb927.11.8820	glutathionylspermidine synthetase, putative	Redox	Tb927.11.08820	+	NA	1150	-0.5653	4.55e-11	-0.2943	0.287265	-0.2912	0.188	1.05	0.255	0	0	0	0	1.7624	0.558	-0.02	2.0235	0.9	-0.152
Tb927.11.1420	hypothetical protein, conserved	ZUnknown	Tb927.11.01420	+	NA	3566	-1.5135	5.43e-203	-0.2882	1	-0.2609	0.905	0.69	0.251	1	0	0	0	1.7788	0.3829	-0.205	0.1861	1.26	0.3334
Tb927.10.8330	S. cerevisiae PSP1 homologue, putative	ZUnknown	Tb927.10.08330	-	783	925	-0.0942	0.349	0.2292	1	0.2532	0.999	0.5	0.251	0	0	0	0	-0.2057	-1.1978	-1.545	-1.6001	1.23	0.2987
Tb927.10.10650	NAR1 Cytosolic iron-sulphur cluster biogenesis, hydrogenase large subunit	Enzyme	Tb927.10.10650	-	1702	1158	0.1113	0.17	-0.0739	1	-0.0758	0.999	0.86	0.251	0	0	0	0	0.1758	-0.0242	-0.049	0.08	1.17	0.2265
Tb927.11.10190	telomerase reverse transcriptase, putative	DNA	Tb927.11.10190	+	NA	3862	-0.0127	0.853	-0.0357	1	-0.0288	0.999	0.57	0.251	0	0	0	0	0.0153	0.0496	0.586	0.3463	1.06	0.0841
Tb927.8.7440	lipase, putative	Lipids	Tb927.08.7440	+	2539	1847	0.83	1.01e-42	0.2096	0.882119	0.1878	0.327	0.99	0.251	0	1	0	0	1.3109	-0.1337	0.135	0.9584	1.03	0.0426
Tb927.2.3750	Domain of unknown function (DUF4520), putative	ZUnknown	Tb927.02.3750	-	2740	1138	-0.3021	2.51e-05	-0.0702	1	-0.066	0.999	0.65	0.251	0	0	0	0	0.7578	0.2365	0.154	0.3002	0.97	-0.0439
Tb927.11.1800	histone H1	Chromatin	Tb927.11.01800	-	NA	2743	0.069	0.296	0.1656	1	0.2609	0.693	0.28	0.251	0	0	0	0	#N/A	#N/A	-1.173	-2.066	0.97	-0.0439
Tb927.2.6130	ABC transporter, putative	Transporter	Tb927.02.6130	+	3275	3157	-0.0218	0.75	0.103	1	0.0973	0.999	0.58	0.251	0	0	0	0	0.4821	0.2376	0.646	-0.0149	0.93	-0.1047
Tb927.7.4900	XRNA	RNA.degradation	Tb927.07.4900	-	8681	8074	0.196	1.83e-06	0.5457	0.563629	0.5438	0.337	0.52	0.251	0	0	0	0	1.3185	0.8869	0.186	-0.4222	0.92	-0.1203
Tb927.10.13780	GSK3-short glycogen synthase kinase 3	Glycans	Tb927.10.13780	-	4540	5597	0.6254	3.68e-35	1.5745	5.30558e-10	1.0309	0.00021	0.94	0.2469	0	1	0	1	0.6763	0.1948	-0.207	0.1461	1.87	0.903
Tb927.10.5180	TPR-repeat-containing chaperone protein DNAJ, putative	Chaperone	Tb927.10.05180	+	4272	2918	-0.1392	0.00904	0.2082	1	0.158	0.999	0.86	0.2469	0	0	0	0	1.17	0.7189	0.222	0.4039	1.27	0.3448
Tb927.7.4230	ESP12 Enriched in surface-labeled proteome	Vesicular.transport	Tb927.07.4230	+	1476	2024	0.1752	0.0053	0.2545	0.93906	0.2413	0.886	0.66	0.2469	0	0	0	0	1.5457	-0.5003	-0.162	2.601	1.1	0.1375
Tb927.10.14200	syntaxin 5	Vesicular.transport	Tb927.10.14200	-	1609	1291	0.1214	0.111	-0.0828	1	-0.1001	0.999	0.88	0.2469	0	0	0	0	0.0335	-0.4103	-0.104	0.3034	1.08	0.111
Tb927.6.3910	hypothetical protein, conserved	ZUnknown	Tb927.06.3910	-	613	207	-0.0255	0.896	-0.2194	0.928141	-0.183	0.969	1.04	0.2469	0	0	0	0	-1.1976	-0.4565	0.021	-0.0454	1.07	0.0976
Tb927.11.1030	KKT7 Kinetochore protein	Cell.cycle	Tb927.11.01030	+	NA	3597	-0.1909	0.000169	0.5445	0.789515	0.524	0.513	0.83	0.2469	0	0	0	0	1.0431	-0.145	-0.814	-0.3584	1.06	0.0841
Tb927.10.3140	BBP68	Cytoskeleton	Tb927.10.03140	+	2373	1702	0.0153	0.852	-0.0324	1	-0.0267	0.999	1.06	0.2469	0	0	0	0	-0.3096	0.0414	-0.08	0.0992	1.05	0.0704
Tb927.5.1750	conserved protein, unknown function	ZUnknown	Tb927.05.1750	+	1974	1064	-0.2116	0.0109	-0.225	1	-0.2186	0.999	0.73	0.2469	0	0	0	0	-0.0262	-0.1536	0.275	0.1179	1.04	0.0566
Tb927.4.2320	hypothetical protein, conserved	ZUnknown	Tb927.04.2320	+	1364	689	-0.2826	0.00209	0.0592	1	0.0321	0.999	0.86	0.2469	0	0	0	0	-0.1849	-0.1835	0.161	-0.7815	1.01	0.0144
Tb927.8.6850	Zinc finger, C3HC4 type (RING finger)/EF-hand domain pair, putative	Zinc.finger	Tb927.08.6850	-	1259	1076	-0.0148	0.883	0.0082	1	0.0436	0.999	0.72	0.2469	0	0	0	0	-0.8012	0.2598	0.014	0.4642	0.97	-0.0439
Tb927.5.1000	ubiquitin-conjugating enzyme e2, putative	Ubiquitin.proteasome	Tb927.05.1000	+	1761	4086	-0.1709	0.00113	0.201	1	0.1603	0.999	0.18	0.2469	0	0	0	0	1.3481	-0.3555	-1.168	-0.4226	0.96	-0.0589
Tb927.10.7360	ATP-binding cassette protein, putative	ZUnknown	Tb927.10.07360	-	2671	1480	0.1954	0.00489	0.1901	1	0.2255	0.812	0.9	0.2469	0	0	0	0	-0.034	0.2219	0.376	1.5774	0.93	-0.1047
Tb927.7.7060	Got1/Sft2-like family, putative	ZUnknown	Tb927.07.7060	-	1443	511	0.6821	1.38e-11	0.2072	1	0.1578	0.999	1.04	0.2429	0	1	0	0	-0.9481	0.8097	0.326	-1.0894	1.41	0.4957
Tb927.10.10110	PIG-P, putative	ZUnknown	Tb927.10.10110	+	569	334	0.2311	0.0735	0.0158	1	-0.0799	0.999	1.03	0.2429	0	0	0	0	0.171	-0.4726	-0.116	0.0192	1.07	0.0976
Tb927.2.4620	Transmembrane adaptor Erv26, putative	ZUnknown	Tb927.02.4620	-	1405	626	-0.0201	0.868	-0.23	1	-0.2106	0.999	1	0.2429	0	0	0	0	-0.8158	0.1145	0.135	0.7448	1.05	0.0704
Tb927.6.3650	ARL3C	Cytoskeleton	Tb927.06.3650	-	1747	1951	-0.431	5.8e-11	-0.2567	0.888563	-0.2805	0.446	0.51	0.2429	0	0	0	0	-0.9639	-0.3372	-0.116	-0.6695	1.04	0.0566
Tb927.11.13750	Ras-related protein Rab4	Vesicular.transport	Tb927.11.13750	+	NA	555	0.2056	0.045	-0.1292	1	-0.0982	0.999	0.71	0.2429	0	0	0	0	0.3595	-0.018	0.152	-0.078	1.03	0.0426
Tb927.11.12580	hypothetical protein, conserved	ZUnknown	Tb927.11.12580	+	NA	2087	0.024	0.769	0.272	0.854818	0.2563	0.399	0.82	0.2429	0	0	0	0	0.9262	-0.14	-0.025	0.8228	1.01	0.0144
Tb927.11.16380	TPR repeat, putative	ZUnknown	Tb927.11.16380	-	NA	738	0.1225	0.202	0.0133	1	0.0243	0.999	0.99	0.2429	0	0	0	0	-0.0829	-0.191	0.228	-0.3945	0.99	-0.0145
Tb927.10.9720	RNA-editing-associated protein 1, oligo (U) binding protein (REAP-1)	Mito.RNA	Tb927.10.09720	+	1980	3865	0.1507	0.0134	-0.0663	1	-0.0625	0.999	0.92	0.2429	0	0	0	0	#N/A	0.1763	-0.072	0.368	0.99	-0.0145
Tb927.11.6760	leucine-rich repeat protein (LRRP)	LRRP	Tb927.11.06760	-	NA	1542	0.1447	0.0447	-0.021	1	-0.0402	0.999	0.68	0.2388	0	0	0	0	-0.2431	-0.3489	0.732	-0.0793	1.16	0.2141
Tb927.10.15390	FAZ7 Trypanosome-specific kinesin family 2	Cytoskeleton	Tb927.10.15390	+	5808	4088	-0.1103	0.0294	0.9751	0.279494	0.777	0.000632	0.67	0.2388	0	0	0	0	0.8377	0.7401	-0.202	0.2754	1.15	0.2016
Tb927.3.3200	Domain of unknown function (DUF4586), putative	ZUnknown	Tb927.03.3200	-	2177	2385	0.2366	0.000634	0.0767	1	0.0327	0.999	0.79	0.2388	0	0	0	0	-0.4146	-0.4649	-0.775	-0.4107	1.11	0.1506
Tb927.9.14260	hypothetical protein, conserved	ZUnknown	Tb927.09.14260	-	NA	2105	0.1595	0.0162	-0.1162	1	-0.1225	0.999	0.62	0.2388	0	0	0	0	0.1891	0.0754	-0.036	0.2094	1.1	0.1375
Tb927.7.5670	hypothetical protein, conserved	ZUnknown	Tb927.07.5670	+	1308	700	-0.1098	0.265	0.1678	1	0.1458	0.999	0.92	0.2388	0	0	0	0	-0.0842	-0.3064	0.096	0.1524	1.09	0.1243
Tb927.8.3440	hypothetical protein, conserved	ZUnknown	Tb927.08.3440	+	770	252	-0.8574	1.47e-10	-0.4836	0.28362	-0.5367	0.0561	0.89	0.2388	1	0	0	0	-0.5075	-0.3381	0.407	-0.1021	1.06	0.0841
Tb927.10.14660	hypothetical protein, conserved, no domains, no yeast or human match	ZUnknown	Tb927.10.14660	-	1299	1587	0.0837	0.244	-0.0217	1	-0.0282	0.999	0.87	0.2388	0	0	0	0	-0.4033	-0.1099	0.167	0.2788	1.06	0.0841
Tb927.9.10520	hypothetical protein, possible component of cytochorome oxidase complex	Mito.e.transport	Tb927.09.10520	-	NA	585	0.3491	0.000165	-0.2446	0.811105	-0.2134	0.524	1.14	0.2388	0	0	0	0	-0.321	0.5763	0.17	-0.9658	1.04	0.0566
Tb927.10.11800	33 kDa inner dynein arm light chain, axonemal, putative,dynein light chain, putative	Cytoskeleton	Tb927.10.11800	+	1861	1365	0.1537	0.0347	-0.0178	1	0.004	0.999	0.78	0.2388	0	0	0	0	0.2614	-0.2871	-0.121	0.3754	1.04	0.0566
Tb927.7.720	conserved protein	ZUnknown	Tb927.07.0720	-	5784	2545	0.0887	0.142	0.117	1	0.1068	0.999	0.45	0.2388	0	0	0	0	1.8173	0.5787	0.43	0.132	1.01	0.0144
Tb927.6.4000	small glutamine-rich tetratricopeptide repeat protein, putative (SGT)	ZUnknown	Tb927.06.4000	-	2359	3948	-0.6581	4.23e-34	-0.0874	1	-0.4015	0.0339	0.64	0.2347	1	0	0	0	-0.2723	-0.2065	-0.368	-0.4532	1.47	0.5558
Tb927.10.510	ATOM19 (=LOK1=POMP19)	Mito.biogenesis	Tb927.10.00510	+	1193	906	0.045	0.625	0.0944	1	0.0759	0.999	0.98	0.2347	0	0	0	0	-0.6911	-0.1163	0.158	-1.039	1.15	0.2016
Tb927.11.3010	hypothetical protein, conserved	ZUnknown	Tb927.11.03010	-	NA	1246	0.0729	0.351	-0.0185	1	-0.0284	0.999	0.79	0.2347	0	0	0	0	-0.9754	-0.1097	0.323	-0.0623	1.12	0.1635
Tb927.10.13610	hypothetical protein, conserved, 6 C2HC Zn fingers, Zn ribbon, matches other proteins with motif	Zinc.finger	Tb927.10.13610	-	2791	2532	0.1817	0.00691	-0.0216	1	-0.0106	0.999	0.91	0.2347	0	0	0	0	-0.0146	0.0961	0.001	-0.0596	1.11	0.1506
Tb927.9.12470	inositol polyphosphate kinase IPMK	ZUnknown	Tb927.09.12470	+	NA	883	0.4341	1.44e-07	-0.0213	1	-0.0342	0.999	1.04	0.2347	0	0	0	0	-0.4582	0.1466	0.4	-0.0409	1.1	0.1375
Tb927.7.620	hypothetical protein, conserved	ZUnknown	Tb927.07.0620	-	1297	951	0.2083	0.0166	0.1302	1	0.1244	0.999	0.85	0.2347	0	0	0	0	-0.6291	-0.1485	0.476	0.1091	1.09	0.1243
Tb927.10.15150	RNA polymerase III C11 subunit, putative,(RPC11)	RNA.synthesis	Tb927.10.15150	+	789	520	0.2925	0.00459	-0.2089	0.853775	-0.2272	0.967	0.95	0.2347	0	0	0	0	-1.2183	-0.0895	0.714	-0.5812	1.08	0.111
Tb927.9.9780	peptidyl-prolyl cis-trans isomerase (cyclophilin- 40), putative	Chaperone	Tb927.09.09780	-	NA	2646	0.0525	0.433	0.2602	0.547246	0.2287	0.67	0.59	0.2347	0	0	0	0	0.25	0.1449	-0.476	0.4413	1.06	0.0841
Tb927.7.5280	hypothetical protein, conserved	Mito.pathway	Tb927.07.5280	+	7275	6465	0.0855	0.0908	-0.0562	1	-0.0674	0.999	0.4	0.2347	0	0	0	0	0.8457	0.7442	0.202	-0.0976	1.06	0.0841
Tb927.11.3540	hypothetical protein, conserved	ZUnknown	Tb927.11.03540	+	NA	784	-0.0709	0.462	-0.0453	1	-0.0574	0.999	0.73	0.2347	0	0	0	0	-0.8799	-0.2221	-0.152	0.4112	1.01	0.0144
Tb927.11.11160	Phosphate transporter (TbPho91	Lysosome	Tb927.11.11160	+	NA	1988	-0.3081	5.29e-08	-0.1726	1	-0.1828	0.872	0.78	0.2306	0	0	0	0	0.7274	0.5228	0.007	0.2876	1.15	0.2016
Tb927.11.15600	histone deacetylase 2 (DAC2 or HDAC2)	Chromatin	Tb927.11.15600	-	NA	1364	0.0918	0.223	0.0717	1	0.1527	0.901	0.67	0.2306	0	0	0	0	0.1103	-0.4197	-0.084	0.0049	1.03	0.0426
Tb927.2.1850	Tetratricopeptide repeat, putative	ZUnknown	Tb927.02.1850	+	1975	1467	-0.1283	0.0752	0.1316	1	0.1235	0.999	0.75	0.2306	0	0	0	0	1.0686	-0.296	-0.152	0.2186	0.99	-0.0145
Tb927.3.5540	FAP133, Component of the IFT dynein motor	Cytoskeleton	Tb927.03.5540	+	2217	1870	-0.2578	1.49e-05	0.0992	1	0.0923	0.999	0.91	0.2306	0	0	0	0	1.3905	-0.1602	-0.108	0.2656	0.97	-0.0439
Tb927.9.10310	mitochondrial carrier protein, MCP11, phosphate	Mito.transport	Tb927.09.10310	-	NA	4743	-0.0544	0.42	-0.1896	1	-0.1961	0.989	0.52	0.2265	0	0	0	0	-1.1457	-0.4628	-0.064	-2.3347	1.27	0.3448
Tb927.11.5230	hypothetical protein, conserved	ZUnknown	Tb927.11.05230	+	NA	1128	-0.0054	0.956	-0.1148	1	-0.1164	0.985	0.97	0.2265	0	0	0	0	-0.8132	-0.0857	-0.477	-0.2269	1.25	0.3219
Tb927.10.8850	A distinct subfamily of CDD/CDA-like deaminases, putative	ZUnknown	Tb927.10.08850	+	2145	1793	0.029	0.706	0.0233	1	0.0081	0.999	0.94	0.2265	0	0	0	0	0.4748	0.229	-0.156	-0.1761	1.09	0.1243
Tb927.3.2830	brix domain containing protein, putative	ZUnknown	Tb927.03.2830	-	1535	918	-0.5777	1.03e-13	-0.4573	0.0702271	-0.4785	0.00166	1	0.2265	0	0	0	0	-0.8776	0.1783	1.186	-0.0712	0.99	-0.0145
Tb927.7.4390	threonine synthase, putative	Amino.acids	Tb927.07.4390	-	2490	1338	-0.102	0.185	-0.412	0.564835	-0.4071	0.209	0.75	0.2265	0	0	0	0	-2.8687	0.4478	0.442	-2.6714	0.98	-0.0291
Tb927.11.4150	hypothetical protein, conserved	ZUnknown	Tb927.11.04150	-	NA	980	0.2144	0.00667	-0.0169	1	-0.0259	0.999	0.48	0.2265	0	0	0	0	-0.9239	0.0198	0.307	-0.4118	0.95	-0.074
Tb927.9.13990	DRBD2	RNA.binding	Tb927.09.13990	-	NA	4254	-0.3271	5.68e-09	0.2093	1	0.2108	0.993	1.04	0.2224	0	0	0	0	0.2543	0.1831	-0.289	-0.4086	1.54	0.6229
Tb927.4.1480	SNM1 DNA repair nuclease	DNA	Tb927.04.1480	-	3075	3487	0.2831	3.96e-09	0.1328	1	0.0269	0.999	1.05	0.2224	0	0	0	0	1.0978	0.2125	-0.53	0.1228	1.41	0.4957
Tb927.10.1770	hypothetical protein	ZUnknown	Tb927.10.01770	-	885	703	0.295	0.00218	-0.1048	1	-0.2069	0.999	0.71	0.2224	0	0	0	0	1.5673	0.2937	0.337	2.5741	1.15	0.2016
Tb927.8.6100	hypothetical protein, conserved	ZUnknown	Tb927.08.6100	+	4122	4811	0.1035	0.0486	0.4175	0.309445	0.3855	0.0358	0.97	0.2224	0	0	0	0	1.1365	0.7409	0.178	0.9671	1.13	0.1763
Tb927.11.15680	hypothetical protein, conserved	ZUnknown	Tb927.11.15680	-	NA	857	0.0241	0.85	0.0111	1	0.0209	0.999	0.48	0.2224	0	0	0	0	-0.5585	0.1883	-0.515	-0.2297	1.11	0.1506
Tb927.11.860	leucine-rich repeat protein (LRRP)	LRRP	Tb927.11.00860	+	NA	2444	0.0337	0.612	-0.0238	1	-0.0178	0.999	0.7	0.2224	0	0	0	0	0.6404	0.1498	0.14	-0.0602	1.05	0.0704
Tb927.11.5040	leucine-rich repeat protein (LRRP)	LRRP	Tb927.11.05040	+	NA	2834	0.3748	4.23e-13	0.3151	1	0.2975	0.977	0.9	0.2224	0	0	0	0	1.1351	-0.357	-0.22	0.4518	0.99	-0.0145
Tb927.6.3350	hypothetical protein, conserved (YCF45-like)	Mito.pathway	Tb927.06.3350	+	1802	1009	0.1117	0.196	-0.0166	1	-0.022	0.999	0.72	0.2224	0	0	0	0	0.0277	-0.3217	0.579	0.1537	0.91	-0.1361
Tb927.4.2510	multidrug resistance-associated protein, putative,p-glycoprotein (PGPA)	Transporter	Tb927.04.2510	+	5529	4061	-0.1526	0.00281	-0.0254	1	-0.0216	0.999	0.54	0.2183	0	0	0	0	1.5642	0.1369	-0.014	0.869	1.17	0.2265
[truncated: 5,144 more rows]

## Sheet: 5. DeSeq2 all with UTR
GeneID	Annotation	Category	Procyclic WC log2 UTR-log2 CDS	Bloodstream WC log2 UTR-log2 CDS	Procyclic CYT log2 UTR-log2 CDS	Procyclic WC CDS/UTR	Bloodstream WC CDS/UTR	Procyclic CYT CDS/UTR	Procyclic WC CDS log2FoldChange +dox/-dox	Procyclic WC CDS padj +dox/-dox	Procyclic CYT CDS log2FoldChange +dox/-dox	Procyclic CYT CDS padj +dox/-dox	Bloodstream WC CDS log2FoldChange +dox/-dox	Bloodstream WC CDS padj +dox/-dox	Procyclic WC UTR log2FoldChange +dox/-dox	Procyclic WC UTR padj +dox/-dox	Procyclic CYT UTR log2FoldChange +dox/-dox	Procyclic CYT UTR padj +dox/-dox	Bloodstream WC UTR log2FoldChange +dox/-dox	Bloodstream WC UTR padj +dox/-dox	Lowest bound/unbound	Procyclic WC log2 UTR-log2 CDS >1.5	Bloodstream WC log2 UTR-log2 CDS >1.5	Procyclic CYT log2 UTR-log2 CDS >1.5	Procyclic WC 1.5 x down	Procyclic CYT 1.5 x down	Bloodstream 1.5 x down	Procyclic WC 1.5 x up	Procyclic CYT 1.5 x up	Bloodstream 1.5 x up	log2 Procyclic WC CDS/UTR	log2 CYT/WC plus - minus
[truncated: 5,790 more rows]

[truncated: 1 more sheets: 6. Processing site reads]
