# Supplementary material
Source: HighWire-hosted journal article supplement (doi:10.1101/rna.079258.122)
Supplement: Supplemental_Table_S6.xlsx [file Supplemental_Table_S6.xlsx]

## Sheet: Legend
mRNAs associated with DRBD18
DRBD18-TAP expressed in bloodstream forms was pulled down with IgG beads and released with TEV protease. Released RNA (Bound), and RNA from the unbound fraction, were sequenced.
1. Reads per million reads (RPM) for a list of unique genes, eliminating paralogues. Colours are used for columns with the same types of values.
2. Reads per million reads (RPM) all coding regions and 3'-UTRs.
3. Genes from sheet 1 that were "bound" (>2x), the size-matched set with <1x average bound/unbound ratio used for MEME (Figure 5C), and all genes with <1x average bound/unbound ratio, used for Figure 5B and B.
4. Raw mapped reads
KEY
RNAI
2x significantly (padj <0.05) increased
1.5x significantly (padj <0.05) increased
2x significantly (padj <0.05) decreased
1.5x significantly (padj <0.05) decreased
Pull-down
bound/unbound RPM >2 in all three replicates

## Sheet: 1. Unique gene RIP DRBD18
GeneID	Annotation	Class	Copy number	mRNA length	3'-UTR length	Bound 1 *CopyNo_RPM	Bound 2 *CopyNo_RPM	Bound 3 *CopyNo_RPM	Unbound 1 *CopyNo_RPM	Unbound 2 *CopyNo_RPM	Unbound 3 *CopyNo_RPM	Bound/unbound 1	Bound/unbound 2	Bound/unbound 3	lowest Bound/unbound	log2 average Bound/unbound	more than 2	lowest <10	RNAi log2 fold change	RNAi padj	RNAi padj<0.05	Bound & Affected 1.5x	Up 1.5x	Down 1.5x	3UTR/CDS	log2 CYT/WC plus - minus	Possible retention in nucleus (1.5x)	lowest Bound/unbound ZC3H28	log2 average Bound/unbound ZC3H28
Tb927.10.3600	hypothetical protein, conserved	ZUnknown	1	2729	1020	82.8	88.4	209.6	35.8	15.6	20.6	2.31	5.67	10.17	2.31	2.5969	1	0	0.592	9.58e-13	1	1	1	0	0.98	1.2757	0	5.89	2.7485
Tb927.1.3550	hypothetical protein	ZUnknown	1	6796	5637	207	152.4	508.3	100.6	30.8	25.7	2.06	4.95	19.78	2.06	3.1587	1	0	0.8091	3.99e-31	1	1	1	0	1.01	0.6232	0	5.2	2.5236
Tb927.7.5380	DRBD12	RNA.binding	1	6840	4372	95.9	30.1	304.5	35.2	11.1	26	2.72	2.71	11.71	2.71	2.5143	1	0	1.4159	4.39e-122	1	1	1	0	0.84	1.0397	0	4.67	2.5135
Tb927.5.2350	glycosyltransferase (GlcNAc), putative	Glycans	1	2642	1089	143.1	148.3	288.8	63.6	34.7	27.4	2.25	4.27	10.54	2.25	2.5076	1	0	-0.5635	7.06e-13	1	0	0	0	1.09	-0.2958	0	4.63	2.5185
Tb927.8.6650	DRBD13	RNA.binding	1	6908	4640	42.8	32	289	16.4	12.5	20.9	2.61	2.56	13.83	2.56	2.663	1	0	1.0836	1.85e-61	1	1	1	0	1.47	-0.8203	1	4.22	2.3103
Tb927.11.5090	aspartate aminotransferase, mitochondrial	Amino.acids	1			136.1	127.1	223.2	61	26.8	20.8	2.23	4.74	10.73	2.23	2.5607	1	0	-0.0462	0.672	0	0	0	0	#N/A	-0.6089	1	4.05	2.4195
Tb927.8.4310	hypothetical protein, conserved, no domains	ZUnknown	1			108.5	118.1	612.9	45.6	37.4	60	2.38	3.16	10.22	2.38	2.3932	1	0	0.1957	0.00171	1	0	0	0	#N/A	1.3146	0	3.95	2.1922
Tb927.8.3850	PSP1 C-terminal conserved region, putative	ZUnknown	1	3241	1859	41.7	80.8	158.4	18.7	37.8	48.1	2.23	2.14	3.29	2.14	1.3524	1	0	-0.111	0.157	0	0	0	0	1.17	1.0635	0	3.91	2.0531
Tb927.4.2970	chaperone DNAj, putative, J12	Chaperone	2.02	1906	890	67.3	124	104.7	20.8	24.3	27.7	3.24	5.1	3.78	3.24	2.0144	1	0	-0.4332	9.21e-07	1	0	0	0	1.15	-0.2407	0	3.88	2.2296
Tb927.2.2550	hypothetical protein, conserved	ZUnknown	1	2044	271	50.3	138.4	178.3	21.7	24.9	34.9	2.32	5.56	5.11	2.32	2.1144	1	0	0.0697	0.473	0	0	0	0	1.05	-0.098	0	3.75	1.9782
Tb927.6.4720	ZC3H15	RNA.binding	1			82.8	128.9	195.2	36.2	27.9	24.9	2.29	4.62	7.84	2.29	2.2977	1	0	0.465	6.92e-08	1	0	0	0	#N/A	1.0634	0	3.54	1.9184
Tb927.11.15010	NEK21 protein kinase	Protein.kinase	1	4055	2213	122.9	103.6	384.3	54.8	23.6	28.4	2.24	4.39	13.53	2.24	2.7485	1	0	1.1969	1.86e-70	1	1	1	0	1.51	0.5517	0	3.53	1.8278
Tb927.5.2870	hypothetical protein	ZUnknown	1.2			27.9	36.6	183.1	11.8	13.7	16.4	2.36	2.67	11.16	2.36	2.4321	1	0	0.1701	0.112	0	0	0	0	#N/A	0.2479	0	3.4	2.0566
Tb927.1.1840	conserved protein, unknown function	ZUnknown	1	4677	2035	63.2	72.1	158.9	27.4	34.8	40.1	2.31	2.07	3.96	2.07	1.4751	1	0	-0.3163	6.8e-05	1	0	0	0	1.08	0.112	0	3.33	1.9298
Tb927.4.3340	hypothetical protein, conserved, in MCM-BP-TAP	ZUnknown	1	1878	485	69.2	104.4	152.1	32.3	17.5	14.9	2.14	5.97	10.21	2.14	2.6104	1	0	0.8291	1.42e-19	1	1	1	0	1.04	-0.1146	0	3.26	2.025
Tb927.9.7470	purine nucleoside transporter NT10	Nucleotides	1	3722	2291	280.5	354	549.3	120.1	42	32	2.34	8.43	17.17	2.34	3.2193	1	0	-0.3989	6.65e-06	1	0	0	0	0.92	0.4487	0	3.17	1.8992
Tb927.9.12040	MT57 or MTr3 cap methyltransferase	RNA.processing	1			114.4	93.7	182.7	43.3	28.7	55.2	2.64	3.26	3.31	2.64	1.6182	1	0	-0.3816	4.41e-07	1	0	0	0	#N/A	-0.1949	0	3.13	1.7181
Tb927.3.680	cytochrome P450, putative	Mito.e.transport	1			133.5	96.8	256.3	61.1	44.7	47	2.18	2.17	5.45	2.17	1.7078	1	0	-0.158	0.0852	0	0	0	0	#N/A	-0.0601	0	3.11	1.9672
Tb927.5.2480	hypothetical protein, conserved	ZUnknown	1	1879	790	177.8	202.1	285.3	75	45.8	33.3	2.37	4.41	8.57	2.37	2.3552	1	0	0.3641	2.08e-06	1	0	0	0	0.92	-0.7091	1	3.1	1.8797
Tb927.10.7000	hypothetical protein, conserved	ZUnknown	1.07			77.1	81.4	72.3	31.6	26.5	28.1	2.44	3.07	2.57	2.44	1.4294	1	0	0.2049	0.0461	1	0	0	0	#N/A	-0.2659	0	3.09	1.8197
Tb927.11.15980	hypothetical protein, conserved	ZUnknown	1	2978	1373	84.6	239	246.8	32.5	76.8	72.8	2.6	3.11	3.39	2.6	1.6009	1	0	0.1861	0.00306	1	0	0	0	1.07	-0.1012	0	3.08	1.7225
Tb927.10.2850	hypothetical protein	ZUnknown	1	2156	886	143.2	274.8	295.8	66.8	44.5	40.6	2.14	6.18	7.29	2.14	2.3794	1	0	-0.1095	0.172	0	0	0	0	1.07	-0.4867	0	3.04	1.844
Tb927.7.6710	hypothetical protein	ZUnknown	1	1305	400	227.5	348.6	151.4	97.8	36	23.7	2.33	9.68	6.39	2.33	2.6167	1	0	0.1715	0.207	0	0	0	0	2.67	0.5288	0	3.02	1.7485
Tb927.11.14230	Vps23 core domain containing protein, putative	ZUnknown	1	2014	329	159.7	108.6	190.6	69.9	40.5	58.7	2.28	2.68	3.25	2.28	1.4524	1	0	-0.1824	0.0254	1	0	0	0	1.21	-0.2623	0	2.92	1.6229
Tb927.1.4540	cyclin-like F-box protein (CFB1A)	Ubiquitin.proteasome	10.03	4249	1255	711.2	885	2294.9	351.8	242.7	225.4	2.02	3.65	10.18	2.02	2.4014	1	0	0.4727	3.15e-25	1	0	0	0	0.99	0.3361	0	2.88	1.7137
Tb927.10.15040	hypothetical protein, conserved	ZUnknown	1	5694	3899	67.7	59.7	269.5	33	21.5	28.9	2.05	2.78	9.33	2.05	2.2388	1	0	0.1931	0.00451	1	0	0	0	1.18	-1.4063	1	2.87	1.7613
Tb927.7.1810	hypothetical protein, conserved	ZUnknown	2	1646	562	243.6	429.9	371.7	118.1	66.7	51.7	2.06	6.45	7.19	2.06	2.3877	1	0	1.871	1.07e-142	1	1	1	0	1.91	0.6681	0	2.85	1.7908
Tb927.10.13400	Phosphatidic acid phostphatase, putative	Lipids	1.36	1486	450	398.8	645.2	206.8	147.5	77.7	39.5	2.7	8.3	5.24	2.7	2.4365	1	0	0.6119	6.47e-13	1	1	1	0	1.17	-0.3336	0	2.81	1.5801
Tb927.8.4420	hypothetical protein, conserved	ZUnknown	1			175	368.5	127.8	76.5	49.3	28.6	2.29	7.47	4.47	2.29	2.2459	1	0	-0.0553	0.62	0	0	0	0	#N/A	1.3289	0	2.81	1.5656
Tb927.6.690	hypothetical protein, conserved, no clear yeast or human matches	ZUnknown	1	8236	7263	41.4	49.1	142.1	20.6	17.3	18	2.01	2.84	7.89	2.01	2.0863	1	0	1.2624	5.22e-86	1	1	1	0	1.38	-0.4746	0	2.8	1.7991
Tb927.7.690	zinc finger protein, putative	Zinc.finger	1	3821	1920	179.3	133.6	305.5	73.7	40.5	37.6	2.43	3.3	8.13	2.43	2.2079	1	0	0.4795	1.09e-10	1	0	0	0	1.25	-0.1716	0	2.74	1.6415
Tb927.10.9270	emp24/gp25L/p24 family/GOLD, putative	Vesicular.transport	1	1781	938	68.8	77.3	71	28.5	25.2	22.5	2.41	3.07	3.16	2.41	1.5261	1	0	0.0319	0.817	0	0	0	0	0.98	-0.3486	0	2.73	1.5211
Tb927.2.5080	hypothetical protein, conserved	ZUnknown	1	1510	60	149.4	126	112.9	72.2	54.2	38.1	2.07	2.32	2.96	2.07	1.2928	1	0	0.3587	3.84e-05	1	0	0	0	#N/A	-0.1345	0	2.72	1.585
Tb927.9.11740	cyclophilin type peptidyl-prolyl cis-trans isomerase, putative (PPIase)	Chaperone	1	871	47	75.5	96	77.4	28.1	22.8	28.3	2.69	4.21	2.73	2.69	1.6826	1	0	-0.0498	0.684	0	0	0	0	0.91	-0.8829	1	2.71	1.541
Tb927.11.7160	CRK8 cdc2- like protein kinase	Protein.kinase	1			34.7	57.8	146	15.3	23.8	39.7	2.27	2.43	3.68	2.27	1.482	1	0	0.0195	0.847	0	0	0	0	#N/A	-0.1002	0	2.71	1.6781
Tb927.3.1700	DAG acyltransferase	Lipids	1	2288	737	191.1	309.3	288.6	94.7	42.4	44.3	2.02	7.29	6.51	2.02	2.3987	1	0	-0.0865	0.331	0	0	0	0	1.23	0.0107	0	2.69	1.5211
Tb927.11.10920	hypothetical protein, conserved	ZUnknown	1	2300	889	114.8	338.7	153.7	37.9	55.4	31.6	3.03	6.11	4.86	3.03	2.2224	1	0	-0.2139	0.0084	1	0	0	0	1.23	0.4496	0	2.62	1.5059
Tb927.9.11820	CRAL/TRIO domain containing protein, putative	ZUnknown	1	1703	662	103.1	140.8	133.8	39.8	28	18	2.59	5.03	7.43	2.59	2.3267	1	0	0.9877	1.26e-22	1	1	1	0	1.93	0.1916	0	2.57	1.8359
Tb927.3.4180	hypothetical protein	ZUnknown	1			62.3	165.2	136.5	23	48.3	37.7	2.71	3.42	3.62	2.71	1.7004	1	0	-0.0516	0.668	0	0	0	0	#N/A	-0.3458	0	2.54	1.4751
Tb927.4.2160	hypothetical protein, conserved	ZUnknown	1	1152	599	44.4	139	68.4	13.8	15.4	14.8	3.22	9.03	4.62	3.22	2.4914	1	0	0.1863	0.153	0	0	0	0	1.15	-0.1652	0	2.53	1.4751
Tb927.6.2040	nitrate reductase, putative	Enzyme	1			64.1	68.4	121.5	28.9	32	36.4	2.22	2.14	3.34	2.14	1.3599	1	0	0.1368	0.136	0	0	0	0	#N/A	-0.1426	0	2.52	1.541
Tb927.8.880	hypothetical protein	ZUnknown	1	4900	2119	106	146.9	269.6	51.1	50.8	81.4	2.07	2.89	3.31	2.07	1.4629	1	0	-0.4718	5.39e-15	1	0	0	0	0.86	-0.4343	0	2.48	1.3391
Tb927.10.4800	hypothetical protein, conserved	ZUnknown	1.91			182	298.6	372.8	81.1	70.7	72	2.24	4.22	5.18	2.24	1.9561	1	0	-0.098	0.192	0	0	0	0	#N/A	-0.1213	0	2.47	1.7225
Tb927.10.340	mitochondrial structure specific endonuclease I (SSE-1), putative	Mito.DNA	1	1658	759	45	76.3	84	21.2	16.5	19.3	2.12	4.62	4.35	2.12	1.8862	1	0	0.1279	0.242	0	0	0	0	1.16	-0.4039	0	2.44	1.5361
Tb927.10.400	hypothetical protein, conserved	ZUnknown	1.1	1534	919	129.6	292.9	80.4	43.6	27.4	19	2.97	10.69	4.23	2.97	2.5761	1	0	-0.4602	0.000476	1	0	0	0	1.01	-0.0339	0	2.43	1.3618
Tb927.9.15480	hypothetical protein	ZUnknown	2.42	2866	936	127.4	156.2	121.9	63.2	37.4	34.7	2.02	4.18	3.51	2.02	1.6945	1	0	-0.0832	0.366	0	0	0	0	1.37	0.695	0	2.42	1.406
Tb927.6.4050	ZC3H14	RNA.binding	1	1380	399	56.4	117	115.4	18	20.2	12.7	3.13	5.79	9.09	3.13	2.5858	1	0	-0.0533	0.706	0	0	0	0	0.84	-0.3166	0	2.42	1.6182
Tb927.1.4800	hypothetical protein, conserved	ZUnknown	1			66.9	74.6	102.3	29.6	29.1	31.9	2.26	2.56	3.21	2.26	1.4204	1	0	0.2414	0.00436	1	0	0	0	#N/A	-0.0065	0	2.42	1.3785
Tb927.6.1100	hypothetical protein, conserved, no domains, kinetoplastid specific	ZUnknown	1	2785	963	51.1	79	131.3	23.2	32.1	43	2.2	2.46	3.05	2.2	1.3618	1	0	0.509	6.82e-13	1	0	0	0	1.09	-0.1029	0	2.41	1.4489
Tb927.7.1790	Adenine phosphoribosyltransferase, putative	Nucleotides	1	1946	1161	57.3	74.6	76.9	22.3	16.9	21.3	2.57	4.41	3.61	2.57	1.8197	1	0	0.4137	3.62e-05	1	0	0	0	1.12	-0.1263	0	2.4	1.281
Tb927.11.5790	hypothetical protein, conserved	ZUnknown	1	1977	626	104.4	185.8	132.6	37.8	46.6	49.9	2.76	3.99	2.66	2.66	1.6492	1	0	-0.0331	0.734	0	0	0	0	1.03	-0.4068	0	2.39	1.406
Tb927.5.3890	hypothetical protein, conserved	ZUnknown	1	1196	210	48	107.1	80.1	21.1	18.5	15.3	2.27	5.79	5.24	2.27	2.1484	1	0	0.6154	4.32e-10	1	1	1	0	1.31	-0.0535	0	2.39	1.4594
Tb927.7.3670	TrkA-N domain containing protein, putative	ZUnknown	1	2683	477	197.3	304.9	432.5	93.4	62.9	81.7	2.11	4.85	5.29	2.11	2.0297	1	0	-0.039	0.601	0	0	0	0	1.1	-0.2711	0	2.37	1.4647
Tb927.11.15550	NADH-cytochrome b5 reductase, putative (B5R)	Mito.e.transport	1	3163	2175	64.9	47.1	111	29.8	17.9	21.6	2.18	2.63	5.14	2.18	1.7297	1	0	0.3731	0.000172	1	0	0	0	0.92	-0.196	0	2.36	1.5753
Tb927.5.3790	Tetraspanin family, putative	ZUnknown	1	2863	704	363.4	331.9	151.4	163.6	95.1	55.4	2.22	3.49	2.73	2.22	1.4923	1	0	-0.1255	0.173	0	0	0	0	1.13	0.9005	0	2.36	1.2987
Tb927.8.2420	hypothetical protein, conserved	ZUnknown	1	1472	488	36	59.2	75.4	13.8	28.7	34.2	2.61	2.06	2.2	2.06	1.1953	1	0	0.2175	0.0192	1	0	0	0	1.07	-0.1685	0	2.36	1.3618
Tb927.3.3160	PAP1 poly(A) polymerase. Cis-spliced. cytosolic	RNA.processing	1	2063	581	192.1	174.3	543.2	80.8	64.1	61.2	2.38	2.72	8.88	2.38	2.2203	1	0	-0.1656	0.0261	1	0	0	0	0.93	-0.1145	0	2.35	1.5261
Tb927.6.1780	MAPK4 protein kinase	Protein.kinase	1	2375	628	140.8	147.9	128	67.5	31.3	34.4	2.09	4.73	3.72	2.09	1.8128	1	0	-0.2921	8.07e-05	1	0	0	0	1.61	0.491	0	2.34	1.2928
Tb927.10.550	hypothetical protein, conserved	ZUnknown	1.16			233.7	271.8	202.3	96	62.8	51.5	2.43	4.33	3.93	2.43	1.8332	1	0	0.331	7.47e-05	1	0	0	0	#N/A	-0.1941	0	2.31	1.384
Tb927.7.2670	ZC3H21	RNA.binding	1.52			130.1	122.2	777.3	63.4	54.8	65.3	2.05	2.23	11.9	2.05	2.4312	1	0	0.3445	4.58e-10	1	0	0	0	#N/A	-0.3577	0	2.27	1.5753
Tb927.10.2390	protein kinase, putative,casein kinase I, putative	Protein.kinase	1.89	2409	1071	108	102	227.5	40.8	38.1	40.3	2.65	2.68	5.65	2.65	1.8718	1	0	0.0563	0.558	0	0	0	0	1.02	0.5884	0	2.26	1.2016
Tb927.9.5020	HMG-box domain containing protein, putative	ZUnknown	1	1510	324	117.2	309.9	161.2	42.4	35.2	39.8	2.76	8.8	4.05	2.76	2.3794	1	0	0.3295	0.00011	1	0	0	0	0.97	-0.1147	0	2.26	1.2869
Tb927.9.14130	hypothetical protein, conserved	ZUnknown	1	2885	1136	341.6	586.9	363	125.2	126.9	117.7	2.73	4.62	3.08	2.73	1.7977	1	0	0.334	1.85e-07	1	0	0	0	1.02	-0.1496	0	2.25	1.3505
Tb927.11.1570	hypothetical protein, conserved no matches	ZUnknown	1	2532	1096	208.1	299.9	399.8	79.2	60	45.7	2.63	5	8.75	2.63	2.4489	1	0	0.3302	1.78e-06	1	0	0	0	1.25	-0.0801	0	2.23	1.2203
Tb927.8.6010	Heme uptake protein LHR1	Transporter	1	1331	778	65.2	201	42.3	16.6	31.7	19.3	3.93	6.34	2.19	2.19	2.0543	1	0	-0.1348	0.298	0	0	0	0	0.97	0.147	0	2.22	1.2079
Tb927.3.5130	exonuclease, putative	ZUnknown	1	2274	1124	171.8	261.4	112.5	80.8	55.1	50.2	2.13	4.74	2.24	2.13	1.6025	1	0	-0.4755	2.04e-07	1	0	0	0	1.38	-0.017	0	2.2	1.2141
Tb927.7.1590	mitotic cyclin,cyclin CycB3 (CYC8)	Cell.cycle	1	3559	1242	144.9	102.2	244.5	61.2	34.8	61.4	2.37	2.94	3.98	2.37	1.6307	1	0	0.1362	0.071	0	0	0	0	1.13	0.1221	0	2.18	1.2265
Tb927.10.410	hypothetical protein, conserved	ZUnknown	2.24	2504	918	270.3	479.3	547.9	126.9	96.9	72.1	2.13	4.95	7.6	2.13	2.2908	1	0	0.1786	0.0133	1	0	0	0	1.28	0.1942	0	2.17	1.2869
Tb927.8.5480	hypothetical protein, conserved	ZUnknown	1	1798	727	59.8	88.2	160.5	24.8	42.4	60.7	2.41	2.08	2.64	2.08	1.2489	1	0	-0.0109	0.905	0	0	0	0	1.03	-0.2521	0	2.15	1.251
Tb927.6.830	hypothetical protein, conserved	ZUnknown	1	2177	1455	97.5	152.9	77.9	47.5	25	26.9	2.05	6.12	2.9	2.05	1.8836	1	0	-0.1046	0.415	0	0	0	0	1.36	0.6082	0	2.13	1.1635
Tb927.3.1020	hypothetical protein, conserved	ZUnknown	1			96.7	396.6	185.2	43.7	58.2	69.4	2.21	6.81	2.67	2.21	1.9622	1	0	0.0515	0.505	0	0	0	0	#N/A	-0.0763	0	2.11	1.2388
Tb927.3.4710	hypothetical protein, conserved	ZUnknown	1	3718	1876	163.2	187.6	305	80.4	69	85	2.03	2.72	3.59	2.03	1.4751	1	0	0.1718	0.00585	1	0	0	0	1.16	1.4217	0	2.1	1.1177
Tb927.8.7710	hypothetical protein, conserved	ZUnknown	1	3340	137	94.8	187.6	142	45.4	20.7	13	2.09	9.06	10.92	2.09	2.8791	1	0	0.3609	0.00168	1	0	0	0	1.12	-0.151	0	2.04	1.1827
Tb927.7.850	Possible TAC component	Mito.DNA	1			140.7	263.7	143.8	70	32.6	33.5	2.01	8.09	4.29	2.01	2.262	1	0	0.1662	0.0927	0	0	0	0	#N/A	-0.1813	0	2.04	1.189
Tb927.10.4750	hypothetical protein, conserved	ZUnknown	1	3319	1993	253.3	328.8	495.6	97.6	57.4	71.1	2.6	5.73	6.97	2.6	2.3505	1	0	0.2308	4.74e-05	1	0	0	0	1.41	-0.254	0	2.02	1.2265
Tb927.11.2460	hypothetical protein, signal pep, TM domain (Q)10	ZUnknown	1			63.2	94	86.1	22.5	25.2	20.6	2.81	3.73	4.18	2.81	1.8373	1	0	0.385	0.000406	1	0	0	0	#N/A	0.109	0	2.02	1.269
Tb927.10.3180	zinc-finger of acetyl-transferase ESCO, putative	Zinc.finger	1	2499	1110	56.1	78.1	103.8	27.9	23.8	24.6	2.01	3.28	4.22	2.01	1.6645	1	0	-0.1607	0.118	0	0	0	0	1.21	0.0112	0	2.01	1.4751
Tb927.1.1750	conserved protein, unknown function	ZUnknown	1	1473	16	60.7	52.7	168.8	30.2	23.1	33.7	2.01	2.28	5.01	2.01	1.6323	1	0	-0.0538	0.531	0	0	0	0	1.13	-0.0295	0	1.99	1.1375
Tb927.11.12160	hypothetical protein, conserved	Mito.pathway	1			64.6	87.5	54.2	30	20.7	15.6	2.15	4.23	3.47	2.15	1.7152	1	0	-0.0384	0.796	0	0	0	0	#N/A	-0.1522	0	1.99	1.0426
Tb927.4.1960	hypothetical protein, conserved	ZUnknown	1			74.5	190.7	98.8	36.3	53.3	40.1	2.05	3.58	2.46	2.05	1.4312	1	0	0.0184	0.857	0	0	0	0	#N/A	-0.0644	0	1.95	1.0909
Tb927.11.15160	hypothetical protein, conserved	ZUnknown	1	4146	2976	129.9	256.4	335.5	59.3	56.4	69	2.19	4.55	4.86	2.19	1.9511	1	0	0.2051	0.000863	1	0	0	0	0.85	0.5625	0	1.94	1.0841
Tb927.11.12120	RBP9	RNA.binding	1	2613	1775	325.3	161.4	127.3	121.7	56.8	60	2.67	2.84	2.12	2.12	1.3467	1	0	0.2345	0.000958	1	0	0	0	0.93	1.6815	0	1.88	1.1243
Tb927.8.4410	ARP2/3 complex subunit, putative	Cytoskeleton	1	1672	650	29.6	51.2	65.4	13.1	21.4	27.2	2.26	2.39	2.4	2.26	1.2327	1	0	0.4515	1.1e-06	1	0	0	0	1.14	-0.0934	0	1.88	1.0356
Tb927.11.14750	PSP1 C-terminal conserved region, putative	ZUnknown	1	1279	82	168.8	264.7	478.9	76.5	48.1	76.8	2.21	5.5	6.24	2.21	2.2172	1	0	0.1534	0.0125	1	0	0	0	0.91	-0.2392	0	1.88	1.0496
Tb927.11.6060	Maf1, binds polIII promoters & represses transcription	ZUnknown	1	1757	246	293.2	460	256.4	121.2	89	77.2	2.42	5.17	3.32	2.42	1.8626	1	0	-0.5051	1.72e-13	1	0	0	0	1.14	-0.2406	0	1.85	1.0144
Tb927.1.4700	hypothetical protein, conserved	ZUnknown	1	1703	687	111.6	308.1	172.1	50.2	47.1	36.3	2.22	6.54	4.74	2.22	2.1699	1	0	0.5074	1.31e-10	1	0	0	0	1.45	-0.025	0	1.76	0.9855
Tb927.8.5060	ARL6, vesicle-associated, needed for full-length flagellum	Vesicular.transport	1	770	70	62.8	330.8	115.6	19.7	27.1	27.7	3.19	12.21	4.17	3.19	2.7056	1	0	0.2348	0.017	1	0	0	0	0.98	0.0798	0	1.76	0.856
Tb927.4.4020	amino acid transporter, putative	Amino.acid.transport	1.11	2259	761	700.8	1022.5	1177.8	282.9	227	265.3	2.48	4.5	4.44	2.48	1.9285	1	0	-0.4001	1.69e-16	1	0	0	0	1.15	0.1878	0	1.75	0.9486
Tb927.5.1550	mitochondrial carrier protein, MCP23	Mito.transport	1	1824	771	158.6	170.3	172.4	77.5	53.2	81.8	2.05	3.2	2.11	2.05	1.2947	1	0	-0.2507	0.000179	1	0	0	0	0.99	-0.3213	0	1.71	0.7991
Tb927.11.10530	hypothetical protein, conserved	ZUnknown	1	977	280	47.6	194	63.5	21.1	20.9	15.3	2.26	9.28	4.15	2.26	2.3868	1	0	0.3233	0.013	1	0	0	0	1.3	-0.2736	0	1.7	1.251
Tb927.3.3890	hypothetical protein, conserved	Mito.pathway	1			61.6	117.9	84.6	30.6	30.3	20.9	2.01	3.89	4.05	2.01	1.7297	1	0	-0.1497	0.166	0	0	0	0	#N/A	-0.0694	0	1.7	0.9336
Tb927.10.5760	adenylate kinase, glycosomal (ADKD)	Nucleotides	1			107.4	157	89.9	30.9	27.8	28.6	3.48	5.65	3.14	3.14	2.0321	1	0	0.2803	0.000526	1	0	0	0	#N/A	0.0669	0	1.69	0.8953
Tb927.8.3390	hypothetical protein, conserved	ZUnknown	1			252	308.9	78	111.7	66.3	35	2.26	4.66	2.23	2.23	1.6088	1	0	1.6154	4.51e-95	1	1	1	0	#N/A	0.7129	0	1.69	0.8156
Tb927.11.5540	emp24/gp25L/p24 family/GOLD, putative	Vesicular.transport	1	1658	813	203.4	218.7	109.9	80.8	60.5	47.4	2.52	3.61	2.32	2.32	1.494	1	0	0.3745	3.15e-05	1	0	0	0	0.87	-0.1333	0	1.68	0.8875
Tb927.9.12000	LEM3 (ligand-effect modulator 3) family / CDC50 family, putative	ZUnknown	1	2261	1025	339.6	265.3	236.7	165.8	95.1	91.6	2.05	2.79	2.58	2.05	1.3065	1	0	-0.1278	0.0681	0	0	0	0	1.17	0.479	0	1.67	0.848
Tb927.11.10340	Phosphoglycerate mutase-like	Glucose.glycerol	1	2061	276	110	159.9	220	45.1	38.7	57	2.44	4.13	3.86	2.44	1.7977	1	0	-1.1294	4.76e-66	1	1	0	1	0.9	-0.0933	0	1.67	0.8319
Tb927.8.1670	NEK14 protein kinase	Protein.kinase	1			72	111.6	241.9	21.5	49.1	93.9	3.35	2.27	2.58	2.27	1.4507	1	0	0.1312	0.0697	0	0	0	0	#N/A	-0.1596	0	1.67	0.8718
Tb927.7.2600	class I transcription factor A, subunit 7 (CITFA-7)	RNA.synthesis	1	1468	963	111.3	328.4	221.4	31.3	37.3	39.3	3.56	8.8	5.63	3.56	2.5842	1	0	-0.2687	0.00368	1	0	0	0	0.93	-0.1048	0	1.66	0.9184
Tb927.6.3240	hypothetical protein, conserved	ZUnknown	1	2341	1270	433.8	662.6	431.8	121.3	84	84.3	3.58	7.89	5.12	3.58	2.4673	1	0	-0.2434	0.000151	1	0	0	0	1.12	-0.7975	1	1.64	0.8074
Tb927.10.8570	hypothetical protein, conserved	ZUnknown	1	2293	331	117.1	234.1	228.2	57.1	74.9	79.1	2.05	3.13	2.88	2.05	1.4258	1	0	-0.068	0.366	0	0	0	0	1.43	0.3201	0	1.64	0.9561
Tb927.10.8920	TbGRP ras-like small GTPase	Signalling	1.88	1528	479	349.8	1484.7	453.8	118.6	93.8	85.8	2.95	15.83	5.29	2.95	3.0042	1	0	-0.0809	0.272	0	0	0	0	0.94	-0.3496	0	1.62	0.8074
Tb927.8.5870	hypothetical protein, conserved	ZUnknown	1	1636	935	38.7	104	124.1	14.7	23.7	14.7	2.63	4.39	8.44	2.63	2.3655	1	0	0.5577	1.28e-09	1	0	0	0	1.06	0.0155	0	1.59	0.8797
Tb927.10.12460	Zinc finger, C3HC4 type (RING finger), putative	Mito.pathway	1			87.3	244.2	99.1	23.1	48.7	46.8	3.78	5.01	2.12	2.12	1.8626	1	0	0.0955	0.351	0	0	0	0	#N/A	-0.0472	0	1.58	0.6781
Tb927.9.2420	hypothetical protein, conserved	ZUnknown	1			94.7	177.3	98.8	29.1	22.2	29.5	3.25	7.99	3.35	3.25	2.2819	1	0	0.1316	0.245	0	0	0	0	#N/A	-0.1812	0	1.56	0.8953
Tb927.10.5970	predicted zinc finger protein	ZUnknown	2.03	2668	958	95.4	101.2	161.2	38.4	42	62	2.48	2.41	2.6	2.41	1.32	1	0	0.2096	0.00313	1	0	0	0	1.39	-0.2324	0	1.55	0.7049
Tb927.4.980	actin, putative	Cytoskeleton	1	1720	403	80.7	178.4	105.8	25	36.3	28.3	3.23	4.91	3.74	3.23	1.9855	1	0	-0.5839	5.83e-10	1	0	0	0	1	-0.2407	0	1.54	0.8237
Tb927.8.1000	hypothetical protein, conserved	ZUnknown	1	1817	879	72.8	118.3	96.1	29.1	23	26	2.5	5.14	3.7	2.5	1.9184	1	0	0.2907	0.00226	1	0	0	0	1.11	-0.2801	0	1.52	0.9107
Tb927.11.4680	SURF1 family, putative	Mito.pathway	1			180	302	167.4	85.8	97	66.7	2.1	3.11	2.51	2.1	1.3636	1	0	0.4442	4.85e-10	1	0	0	0	#N/A	0.0936	0	1.51	1.0976
Tb927.11.2080	hypothetical protein, conserved	ZUnknown	1	1088	74	77.4	259.3	114.1	30.6	37.1	38.5	2.53	6.99	2.96	2.53	2.0566	1	0	0.0551	0.607	0	0	0	0	0.99	-0.0262	0	1.5	0.9336
Tb927.1.690	hypothetical protein, conserved	ZUnknown	1	1215	380	123.4	282.5	93.5	56.4	50.8	37.5	2.19	5.56	2.49	2.19	1.7712	1	0	0.1802	0.0384	1	0	0	0	1.01	-0.107	0	1.49	0.7225
Tb927.5.1040	hypothetical protein	ZUnknown	1		134	109.7	488.1	53.5	37.9	38.4	17.3	2.89	12.71	3.09	2.89	2.6392	1	0	-0.1365	0.345	0	0	0	0	1.26	0.0779	0	1.47	0.7398
Tb927.8.3340	hypothetical protein, conserved	ZUnknown	1			91.4	170	163.7	41.7	27.4	32	2.19	6.2	5.12	2.19	2.171	1	0	-0.4265	4.08e-08	1	0	0	0	#N/A	0.8353	0	1.47	0.757
Tb927.9.9300	hypothetical protein, conserved	ZUnknown	1	3150	1590	112.3	179.8	359.6	48.5	50	51.4	2.32	3.6	7	2.32	2.1066	1	0	-0.8311	6.09e-29	1	1	0	1	1.14	-0.5281	0	1.44	0.5656
Tb927.6.3880	hypothetical protein, conserved	ZUnknown	1	3852	2099	126.9	145.1	324.7	53.8	37.4	40.6	2.36	3.88	8	2.36	2.2469	1	0	-0.2738	0.00125	1	0	0	0	0.94	0.0714	0	1.42	0.9107
Tb927.9.15870	hypothetical protein	ZUnknown	4.74	1185	208	573.7	1583.4	416.3	122.1	170.1	68	4.7	9.31	6.12	4.7	2.7463	1	0	-0.2662	0.000271	1	0	0	0	0.85	0.6499	0	1.41	0.6508
Tb927.3.3680	hypothetical protein, conserved	Mito.pathway	1	973	469	167.1	280.5	71.4	23.1	23.4	24.1	7.23	11.99	2.96	2.96	2.8862	1	0	0.1118	0.367	0	0	0	0	1.02	-0.1901	0	1.41	0.5558
Tb927.5.1050	hypothetical protein	ZUnknown	1	3420	2231	54.4	49.4	69.2	21.5	18.6	14.1	2.53	2.66	4.91	2.53	1.7513	1	0	0.8966	3.37e-14	1	1	1	0	1.28	0.1796	0	1.4	1.0635
Tb927.3.750	SET domain containing protein, putative	Mito.pathway	1.78	1579	548	203.8	686.9	176.5	76.5	55.2	39.6	2.66	12.44	4.46	2.66	2.7049	1	0	0.3387	0.000263	1	0	0	0	0.97	-0.0498	0	1.39	0.5945
Tb927.11.12340	predicted Zinc finger, C3HC4 type (RING finger) protein	Ubiquitin.proteasome	1	1369	401	102.3	121.2	83.8	47.6	41.4	38.9	2.15	2.93	2.15	2.15	1.269	1	0	0.0844	0.398	0	0	0	0	1.05	-0.2038	0	1.38	0.8797
Tb927.3.2940	hypothetical protein, conserved, no clear yeast or human matches	ZUnknown	1	1623	441	124.6	296.3	91.1	50.4	33	17.6	2.47	8.98	5.18	2.47	2.4708	1	0	-0.15	0.237	0	0	0	0	0.89	0.1	0	1.37	0.5361
Tb927.8.3270	hypothetical protein	ZUnknown	1	786	63	151.8	804.6	160.3	69.1	41.7	31	2.2	19.29	5.17	2.2	3.1516	1	0	0.1957	0.065	0	0	0	0	0.92	-0.004	0	1.37	0.5361
Tb927.7.520	cytochrome b5-like Heme/Steroid binding domain containing protein, putative	ZUnknown	1	1432	689	49.4	48.3	110.4	18.6	17.4	16.2	2.66	2.78	6.81	2.66	2.0297	1	0	-0.5187	3.36e-06	1	0	0	0	0.97	1.113	0	1.36	0.6135
Tb927.3.2990	hypothetical protein, conserved	ZUnknown	1	920	272	121.8	657.5	132.2	55.1	45.6	22.7	2.21	14.42	5.82	2.21	2.9037	1	0	0.0532	0.692	0	0	0	0	0.94	-0.2836	0	1.35	0.585
Tb927.1.1770	glutaredoxin GRX2	Redox	1	1037	701	422.1	737.1	250.3	141.2	51.4	36	2.99	14.34	6.95	2.99	3.0167	1	0	-0.2138	0.0896	0	0	0	0	1.26	0.0051	0	1.34	0.4751
Tb927.9.5220	conserved protein	ZUnknown	1			150.5	383.2	200.9	40.7	27.7	31.7	3.7	13.83	6.34	3.7	2.9922	1	0	0.1323	0.279	0	0	0	0	#N/A	-0.3675	0	1.34	0.5753
Tb927.4.790	hypothetical protein, conserved	ZUnknown	1	1087	105	152.6	176.8	81.4	67.1	44.6	35.5	2.27	3.96	2.29	2.27	1.5059	1	0	-0.322	0.00414	1	0	0	0	1.35	0.2125	0	1.33	0.516
Tb927.1.2310	hypothetical protein	ZUnknown	1	799	291	118.5	154.5	96.5	55	45.5	45.1	2.15	3.4	2.14	2.14	1.358	1	0	-1.6155	3.14e-15	1	1	0	1	1.03	0.4325	0	1.32	0.8074
Tb927.11.16720	CYC6 mitotic cyclin	Cell.cycle	1	4074	2303	118.8	79.7	228.5	51.7	32.3	71.8	2.3	2.47	3.18	2.3	1.406	1	0	-0.1577	0.0105	1	0	0	0	1.04	0.7672	0	1.31	0.5558
Tb927.11.6090	tatD related deoxyribonuclease, putative	DNA	3.02			198.4	490.8	136.3	81.9	75	59.6	2.42	6.54	2.29	2.29	1.9069	1	0	-0.656	1.28e-10	1	1	0	1	#N/A	-0.0939	0	1.31	0.4542
Tb927.8.4620	small GTP-binding protein Rab7, putative	Vesicular.transport	1	944	141	109.2	296.3	136.8	36.1	36.4	38.4	3.02	8.14	3.56	3.02	2.2947	1	0	-0.0353	0.766	0	0	0	0	1.16	-0.088	0	1.3	0.4854
Tb927.7.2280	hypothetical protein, trypanosome-specific.	ZUnknown	1			106.1	235.5	102.6	44	43.3	32.8	2.41	5.44	3.13	2.41	1.8718	1	0	-0.309	0.00088	1	0	0	0	#N/A	-0.2231	0	1.3	0.7908
Tb927.11.16520	hypothetical protein, conserved	ZUnknown	1	986	582	219.3	1168.7	160.7	47.5	45.8	29.3	4.62	25.52	5.48	4.62	3.5697	1	0	0.1387	0.213	0	0	0	0	0.97	-0.1607	0	1.28	0.4542
Tb927.3.5410	hypothetical protein, conserved, no clear yeast or human matches	ZUnknown	1			163.5	582	92.5	53.5	27.5	15	3.06	21.16	6.17	3.06	3.3406	1	0	0.2268	0.0946	0	0	0	0	#N/A	0.1527	0	1.28	0.3896
Tb927.8.6600	SAM35, putative	Mito.membrane	1	2937	1709	77.9	88.4	115.1	37.5	27.6	25.9	2.08	3.2	4.44	2.08	1.696	1	0	-0.2025	0.0193	1	0	0	0	1.02	0.1006	0	1.26	0.5558
Tb927.11.8910	NADH dehydrogenase subunit NB6M, putative	Mito.e.transport	1			97.8	270	111.5	41.8	40.1	39.8	2.34	6.73	2.8	2.34	1.9843	1	0	0.2934	0.00216	1	0	0	0	#N/A	-0.1911	0	1.25	0.4957
Tb927.10.610	hypothetical protein, conserved	ZUnknown	1	2242	788	50.4	59.8	195.5	18.3	28.4	40.6	2.75	2.11	4.82	2.11	1.69	1	0	0.3166	0.000189	1	0	0	0	0.88	-0.3219	0	1.24	0.4854
Tb927.3.3700	hypothetical protein	ZUnknown	1			176.9	548.9	43.5	46.9	56.5	16.2	3.77	9.72	2.69	2.69	2.4312	1	0	-0.0653	0.74	0	0	0	0	#N/A	0.1049	0	1.23	0.4005
Tb927.3.1960	hypothetical protein, conserved	ZUnknown	1	1492	881	41.3	73.4	54.8	18	12.4	15.8	2.29	5.92	3.47	2.29	1.961	1	0	-0.0845	0.553	0	0	0	0	1.08	-0.1497	0	1.22	0.4751
Tb927.11.14280	septum formation protein MAF homologue, putative	ZUnknown	1			55.4	87.4	83.9	25.8	24.2	38.6	2.15	3.61	2.17	2.15	1.4024	1	0	-0.4454	7.26e-07	1	0	0	0	#N/A	-0.2472	0	1.2	0.4222
Tb927.11.2160	hypothetical protein, conserved	ZUnknown	1	795	108	148.7	397.9	85	49.8	38.1	26.8	2.99	10.44	3.17	2.99	2.4681	1	0	0.5215	2.66e-08	1	0	0	0	1.01	-0.0933	0	1.19	0.5261
Tb927.6.4030	superoxide dismutase, putative	Redox	1	1269	413	199.8	610.7	208.5	80.2	56.4	49.8	2.49	10.83	4.19	2.49	2.5451	1	0	-0.283	0.000429	1	0	0	0	1.04	0.0045	0	1.18	0.3785
Tb927.11.13650	cytochrome b5, putative (CYB5)	Mito.e.transport	1	784	336	66.9	141.9	60.9	20.9	35	29.2	3.2	4.05	2.09	2.09	1.6385	1	0	0.6673	5.67e-09	1	1	1	0	0.99	-0.0011	0	1.18	0.4647
Tb927.3.4160	XPC-binding domain/UBA/TS-N domain containing protein, putative	ZUnknown	1	1422	410	79.6	146	133.8	37.8	37	47.2	2.11	3.95	2.83	2.11	1.5672	1	0	-0.2796	0.000178	1	0	0	0	1.05	-0.229	0	1.17	0.3674
Tb927.3.2970	hypothetical protein, conserved	ZUnknown	1	832	92	68.4	114.7	50.4	33.6	41.3	24.1	2.04	2.78	2.09	2.04	1.2037	1	0	0.3277	0.00549	1	0	0	0	1.28	-0.1003	0	1.17	0.3334
Tb927.6.4810	zinc-binding protein (Yippee), putative	Zinc.finger	1	1079	672	131.6	190.4	86.1	41.9	32.5	20.7	3.14	5.86	4.16	3.14	2.1331	1	0	0.0647	0.603	0	0	0	0	1.14	0.1846	0	1.16	0.669
Tb927.11.14390	hypothetical protein, conserved	ZUnknown	1	1686	686	232.5	382.3	220.4	112.3	80.2	73.2	2.07	4.77	3.01	2.07	1.7152	1	0	0.2289	0.0028	1	0	0	0	1.02	-0.0898	0	1.14	0.3219
Tb927.7.5680	deoxyribose-phosphate aldolase, putative	Enzyme	1	1065	167	116.3	434.1	273.7	42	43.1	33.4	2.77	10.07	8.19	2.77	2.8094	1	0	-0.0766	0.473	0	0	0	0	1.1	0.1778	0	1.14	0.6135
Tb927.5.810	ZC3H11	RNA.binding	1.76	4912	3500	811.2	900.7	2093.6	371.2	387.5	525.4	2.19	2.32	3.98	2.19	1.5008	1	0	-0.3268	8.18e-12	1	0	0	0	1.09	0.1855	0	1.13	0.3674
Tb927.9.5960	SDH2C succinate dehydrogenase (complex II) subunit	Mito.e.transport	1	1693	934	93.4	152.8	92.9	33.6	28.4	27.1	2.78	5.38	3.43	2.78	1.9498	1	0	0.9483	1.12e-23	1	1	1	0	1.19	-0.2296	0	1.11	0.3334
Tb927.8.6630	hypothetical protein	Mito.pathway	1	1312	652	170.4	365.1	364.1	65.7	30.3	32.6	2.59	12.05	11.17	2.59	3.1049	1	0	0.4224	2.29e-08	1	0	0	0	1.15	-0.2691	0	1.11	0.2265
Tb927.3.3720	Golgi vesicular membrane trafficking protein, putative	Vesicular.transport	1			139.9	297.1	54	56.9	54	20.2	2.46	5.5	2.67	2.46	1.8251	1	0	0.4377	2.99e-05	1	0	0	0	#N/A	0.2395	0	1.11	0.2016
Tb927.8.3990	hypothetical protein, conserved	ZUnknown	1			350	400.7	250.1	110.7	86.6	112.4	3.16	4.63	2.23	2.23	1.7398	1	0	-0.146	0.0366	1	0	0	0	#N/A	0.1166	0	1.1	0.189
Tb927.4.400	DRBD7	RNA.binding	1.1			480.8	1143.1	559.1	115.3	61.3	87.3	4.17	18.65	6.4	4.17	3.2839	1	0	-0.2174	0.00151	1	0	0	0	#N/A	-0.178	0	1.09	0.3896
Tb927.6.3130	queuine tRNA-ribosyltransferase, putative	rRNA.tRNA.process	1.13			135.2	173.5	76.1	64.3	52.4	37.5	2.1	3.31	2.03	2.03	1.3103	1	0	-0.0581	0.548	0	0	0	0	#N/A	-0.0404	0	1.09	0.1635
Tb927.10.1070	CRK1 cdc2- like protein kinase	Cell.cycle	1	1965	621	76	110.8	149.9	34.6	26.3	50.2	2.2	4.21	2.99	2.2	1.6477	1	0	0.0072	0.94	0	0	0	0	0.99	-0.0498	0	1.05	0.2987
Tb927.2.4150	hypothetical protein, conserved	ZUnknown	1	1397	420	122.3	222.4	127.6	52.3	54.8	48	2.34	4.06	2.66	2.34	1.5945	1	0	-0.478	2.65e-08	1	0	0	0	1.03	0.0629	0	0.98	0.0976
Tb927.2.4480	hypothetical protein, conserved	ZUnknown	1	1787	849	416.4	808.6	256.4	137.2	75.5	60.8	3.03	10.71	4.22	3.03	2.5818	1	0	0.0758	0.35	0	0	0	0	0.98	-0.0341	0	0.97	0.0841
Tb927.3.4250	hypothetical protein, conserved	ZUnknown	1	1774	945	196.5	379.5	173.2	90.2	55.7	47.1	2.18	6.81	3.68	2.18	2.0784	1	0	0.3732	6.78e-09	1	0	0	0	1.07	-0.207	0	0.97	0.0144
Tb927.3.2440	AEK1	Protein.kinase	1.84	1582	56	130.5	146.6	215.9	58.2	39	57.5	2.24	3.76	3.75	2.24	1.7004	1	0	0.2569	0.00125	1	0	0	0	0.97	0.1112	0	0.89	0.0426
Tb927.4.1830	Urm1 (Ubiquitin related modifier), putative	ZUnknown	1	480	58	248.9	646.7	52.9	105.6	70.6	23	2.36	9.16	2.3	2.3	2.2037	1	0	0.2384	0.0262	1	0	0	0	0.84	0.0801	0	0.85	-0.152
Tb927.3.2910	hypothetical protein, conserved	ZUnknown	1	556	132	76.9	111.6	124.7	29.5	19.4	17.4	2.61	5.75	7.17	2.61	2.372	1	0	-0.0551	0.702	0	0	0	0	0.92	0.6446	0	0.83	-0.0145
Tb927.11.3080	vesicular protein trafficking mediator, putative	Vesicular.transport	1	1520	779	359.4	622.5	253.5	157.7	93.8	49.3	2.28	6.64	5.14	2.28	2.2286	1	0	0.8198	3.02e-29	1	1	1	0	1.17	-0.075	0	0.78	0.0144
Tb927.9.13200	hypothetical protein	ZUnknown	1	958	351	169.2	693.9	51.6	40.4	45.6	23.7	4.19	15.22	2.18	2.18	2.8473	1	0	0.6422	5.24e-07	1	1	1	0	1.81	0.4567	0	0.77	-0.3401
Tb927.8.1150	KKT9 Kinetochore protein	Cell.cycle	1	2188	1021	109.6	261.4	204.3	37.8	57.1	66	2.9	4.58	3.1	2.9	1.8183	1	0	-0.0902	0.366	0	0	0	0	0.77	0.3944	0	0.65	-0.415
Tb927.10.5550	hypothetical protein, conserved	ZUnknown	1	768	253	193.6	758.7	80.7	59.5	49.3	33.4	3.25	15.39	2.42	2.42	2.8115	1	0	0.086	0.439	0	0	0	0	1.05	-0.0373	0	0.65	-0.5353
Tb927.4.1040	hypothetical protein, conserved	ZUnknown	1	945	390	132.5	497.8	81.9	39.9	40.2	29	3.32	12.38	2.82	2.82	2.626	1	0	0.1244	0.233	0	0	0	0	1	0.0817	0	0.59	-0.6215
Tb927.5.1360	nucleoside 2-deoxyribosyltransferase (NDRT)	Nucleotides	1	1336	721	399.3	902.6	159.9	191.6	135	72.4	2.08	6.69	2.21	2.08	1.8718	1	0	-0.3186	3.42e-05	1	0	0	0	1.28	-0.0302	0	0.58	-0.5778
Tb927.8.7790	zinc finger domain, LSD1 subclass, putative	Zinc.finger	1	2454	1918	361.6	542.4	157.2	178.1	87.6	56.4	2.03	6.19	2.79	2.03	1.8758	1	0	-1.0637	1.89e-38	1	1	0	1	1	2.0794	0	0.55	-0.737
Tb927.9.5650	E2-like ubiquitin-conjugation enzyme, putative	Ubiquitin.proteasome	1	914	366	296.3	1582.9	214.8	142.1	133.4	67.6	2.09	11.87	3.18	2.09	2.5143	1	0	-0.006	0.957	0	0	0	0	1.05	0.115	0	0.48	-0.811
Tb927.7.4480	adenosine 5'-monophosphoramidase, putative	Nucleotides	1.99	889	254	1015.2	2958.7	495.2	421.6	401.1	218	2.41	7.38	2.27	2.27	2.0072	1	0	0.4036	3.21e-10	1	0	0	0	1.06	0.4381	0	0.36	-1.3585
Tb927.9.1520	hypothetical protein, conserved, no clear yeast or human matches	ZUnknown	1	457	83	1159.4	3503.3	233.3	226.5	144.6	65.7	5.12	24.23	3.55	3.55	3.4551	1	0	-0.2596	0.00894	1	0	0	0	0.96	0.0472	0	0.33	-1.5146
Tb927.9.10280	ZC3H48	RNA.binding	1	4533	3858	17	14.8	45.5	6.9	7.3	8.3	2.46	2.03	5.48	2.03	1.7326	1	0	1.0117	4.44e-19	1	1	1	0	0.94	1.4354	0
Tb927.2.5720	hypothetical protein, predicted by Mitocarta	ZUnknown	1	4058	2873	13.6	11	24.1	3.3	1.3	2.1	4.12	8.46	11.48	4.12	3.0036	1	0	-0.7737	0.0701	0	0	0	0	0.51	1.8535	0
Tb927.5.3130	hypothetical protein	ZUnknown	1	3683	1909	24.5	22.4	110.6	11.8	9.4	10.9	2.08	2.38	10.15	2.08	2.2839	1	0	0.7937	7.53e-21	1	1	1	0	1.36	0.943	0
Tb927.11.1920	hypothetical protein	ZUnknown	1	3447	1101	20.8	32.6	47.5	6.5	6.7	6.2	3.2	4.87	7.66	3.2	2.3905	1	0	-0.5129	0.0245	1	0	0	0	0.94	0.1864	0
Tb927.10.1670	hypothetical protein	ZUnknown	1	2527	106	19.3	32.2	5.9	4.8	6.3	2.5	4.02	5.11	2.36	2.36	1.9373	1	0	-0.4638	0.293	0	0	0	0	0.95	-0.6846	1
Tb927.6.3830	hypothetical protein, conserved	ZUnknown	1	2409	761	84.5	77.1	85	28	24.8	12.1	3.02	3.11	7.02	3.02	2.132	1	0	-0.3548	0.000267	1	0	0	0	0.9	-0.6281	1
Tb927.1.2150	calpain-like protein fragment, putative,calpain-like cysteine peptidase, Clan CA, family C2	Protease	1	2333	1797	89.2	106.9	46.5	29.4	16.7	6.3	3.03	6.4	7.38	3.03	2.4863	1	0	-0.6539	6.93e-05	1	1	0	1	1.08	-0.1683	0
Tb927.8.6570	hypothetical protein, conserved	ZUnknown	1	2277	1068	111.7	162.5	74.3	38.8	13.6	7.4	2.88	11.95	10.04	2.88	3.0514	1	0	0.4131	0.00243	1	0	0	0	1.05	0.0459	0
Tb927.11.8340	hypothetical protein	ZUnknown	1	2184	386	178.9	151.8	81.4	57.2	18.2	14.6	3.13	8.34	5.58	3.13	2.5067	1	0	0.1325	0.44	0	0	0	0	0.83	-0.3305	0
Tb927.8.5350	hypothetical protein, conserved	ZUnknown	1	2062	1308	23.6	54.3	44	6.3	4.7	4.4	3.75	11.55	10	3.75	3.0761	1	0	-0.2117	0.368	0	0	0	0	1.33	1.5885	0
Tb927.8.3400	palmitoyl acyltransferase 12, putative	Lipids	1	1946	814	57.7	80.8	87	24.9	14.9	13.2	2.32	5.42	6.59	2.32	2.256	1	0	-0.4781	0.0001	1	0	0	0	1.08	0.502	0
Tb927.10.12750	hypothetical protein	ZUnknown	1	1910	766	222.3	138.5	105.1	25.3	6.4	6.7	8.79	21.64	15.69	8.79	3.9424	1	0	0.4237	0.237	0	0	0	0	1.62	0.0775	0
Tb927.11.490	hypothetical protein, conserved	ZUnknown	1	1786	566	129.2	248.6	46.1	47.2	36.8	17.2	2.74	6.76	2.68	2.68	2.0215	1	0	1.8675	2.38e-93	1	1	1	0	3.04	0.264	0
Tb927.9.12690	prenyl protein specific carboxyl methyltransferase	Prenylation	1	1700	826	75.6	100.4	72.5	37.4	25.5	23.5	2.02	3.94	3.09	2.02	1.593	1	0	0.3306	0.00226	1	0	0	0	1.96	1.4405	0
Tb927.6.1300	hypothetical protein	ZUnknown	1.04	1658	1070	29.1	25.1	46.9	10.4	4	8.3	2.8	6.28	5.65	2.8	2.2957	1	0	0.0375	0.844	0	0	0	0	1.27	0.4741	0
Tb927.5.460	hypothetical protein, conserved, poly(N)	ZUnknown	3.24	1588	948	164.1	344.2	41.4	29.4	20.7	17.2	5.58	16.63	2.41	2.41	3.0368	1	0	-0.167	0.428	0	0	0	0	0.57	0.1544	0
Tb927.7.5780	thioredoxin, putative	ZUnknown	1	1547	800	85.3	238	42.9	28.4	17.1	6.4	3	13.92	6.7	3	2.977	1	0	-0.0043	0.983	0	0	0	0	1.16	0.217	0
Tb927.11.12730	hypothetical protein	ZUnknown	3.61	1402	494	420.8	779.5	340.8	157.7	65.8	37.4	2.67	11.85	9.11	2.67	2.9776	1	0	-0.9499	2.15e-28	1	1	0	1	0.95	0.1433	0
Tb927.10.9320	hypothetical protein, conserved	ZUnknown	1.4	1342	284	139.2	385.7	68.6	46.5	29.4	19.7	2.99	13.12	3.48	2.99	2.7071	1	0	0.6906	1.42e-09	1	1	1	0	1.18	0.2651	0
Tb927.10.15340	hypothetical protein	ZUnknown	1	1231	511	87.4	189.9	51.8	38.1	27.5	20.5	2.29	6.91	2.53	2.29	1.9672	1	0	-0.4028	0.00108	1	0	0	0	1.03	0.3303	0
Tb927.6.1710	hypothetical protein, conserved	ZUnknown	1	1176	513	49.8	148.4	35.3	11.8	13	11.3	4.22	11.42	3.12	3.12	2.6446	1	0	0.2064	0.132	0	0	0	0	0.99	0.7689	0
Tb927.9.4550	hypothetical protein, conserved	ZUnknown	1	1174	645	56.7	115.7	50.9	19.7	11.6	5.7	2.88	9.97	8.93	2.88	2.86	1	0	0.3838	0.0191	1	0	0	0	1.1	0.145	0
Tb927.5.4450	hypothetical protein, conserved	ZUnknown	2.12	1170	530	60.1	258.2	73.6	26	38.4	24.8	2.31	6.72	2.97	2.31	2	1	0	0.0092	0.956	0	0	0	0	0.95	-0.0544	0
Tb927.3.2880	Mitochondrial ATP synthase subunit, putative	Mito.pathway	1	1152	666	100.6	258.1	83.7	32.5	22.2	13	3.1	11.63	6.44	3.1	2.819	1	0	0.3783	0.00608	1	0	0	0	0.85	0.075	0
Tb927.11.15200	hypothetical protein, conserved	ZUnknown	1	1093	592	77	180.6	98.9	25	8.6	7.7	3.08	21	12.84	3.08	3.6214	1	0	-0.1339	0.463	0	0	0	0	0.9	-0.0443	0
Tb927.11.3040	hypothetical protein	ZUnknown	1	984	724	105.9	529.2	78.5	23.9	10	6.2	4.43	52.92	12.66	4.43	4.5445	1	0	0.5357	0.000168	1	0	0	0	1.41	0.7845	0
Tb927.11.16710	hypothetical protein, conserved	ZUnknown	1	811	404	86.3	126.6	36.7	39	28.2	14.3	2.21	4.49	2.57	2.21	1.6276	1	0	0.6535	5.42e-07	1	1	1	0	1.5	0.0022	0
Tb927.10.1000	hypothetical protein	ZUnknown	1	801	128	70.7	107.8	76.5	28.5	12.9	19.1	2.48	8.36	4.01	2.48	2.3074	1	0	0.4851	2.94e-05	1	0	0	0	0.76	1.233	0
Tb927.10.6200	hypothetical protein, conserved, no clear yeast or human matches	Mito.pathway	1	740	312	94.9	324.4	60.9	38.7	18.2	8.6	2.45	17.82	7.08	2.45	3.1885	1	0	0.3124	0.109	0	0	0	0	0.95	0.1451	0
Tb927.2.2140	hypothetical protein, conserved	ZUnknown	1	738	223	106.1	422.5	19.5	52.3	23.7	8.6	2.03	17.83	2.27	2.03	2.883	1	0	-0.0791	0.741	0	0	0	0	0.86	0.2288	0
Tb927.4.390	hypothetical protein, conserved	ZUnknown	1.45	680	265	387.6	1196.6	109.4	82.6	26.9	12.3	4.69	44.48	8.89	4.69	4.2745	1	0	-0.2074	0.232	0	0	0	0	1.61	0.1536	0
Tb927.5.4370	hypothetical protein, conserved	ZUnknown	2.48	534	157	304.1	821.2	166.8	108.6	60.9	30.9	2.8	13.48	5.4	2.8	2.8533	1	0	0.4338	3.65e-05	1	0	0	0	0.99	-0.0114	0
Tb927.8.5150	hypothetical protein, conserved	ZUnknown	1	430	126	223.8	1333.8	87.2	96.9	75	24	2.31	17.78	3.63	2.31	2.9831	1	0	-0.4283	0.000269	1	0	0	0	1.16	-0.0366	0
Tb927.2.3330	hypothetical protein	ZUnknown	1			11.2	8.1	26.5	4.2	3.4	7.1	2.67	2.38	3.73	2.38	1.5493	1	0	-1.4479	4.13e-09	1	1	0	1	#N/A	-0.1209	0
Tb927.3.5670	hypothetical protein	ZUnknown	1			61.9	79	26.9	20.1	16.7	12.6	3.08	4.73	2.13	2.13	1.7283	1	0	-0.8308	3.97e-07	1	1	0	1	#N/A	-1.29	0
Tb927.2.2570	GAP2	Mito.RNA	1			31.6	84.3	48.2	10.3	15.8	12.3	3.07	5.34	3.92	3.07	2.0391	1	0	0.3476	0.0113	1	0	0	0	#N/A	-0.1132	0
Tb927.10.12760	ZC3H36	RNA.binding	1.04			115.2	68.3	267.3	33.7	8	10.6	3.42	8.54	25.22	3.42	3.6315	1	0	0.2525	0.012	1	0	0	0	#N/A	-1.7851	1
Tb927.10.2420	hypothetical protein	ZUnknown	2.24		1441	23.4	36.5	57.6	9.6	8.2	12.5	2.44	4.45	4.61	2.44	1.9386	1	0	0.7614	3.15e-09	1	1	1	0	1.66	0.3209	0
Tb927.10.4960	hypothetical protein	ZUnknown	1		473	18.8	71.7	16.5	7.9	7.7	3.5	2.38	9.31	4.71	2.38	2.4507	1	0	-0.1968	0.558	0	0	0	0	1.19	-0.341	0
Tb927.9.14230	hypothetical protein, conserved	ZUnknown	1			28.5	63.5	50.5	13.2	26.9	18.6	2.16	2.36	2.72	2.16	1.271	1	0	0.0383	0.758	0	0	0	0	#N/A	0.0076	0
Tb927.10.5720	hypothetical protein	ZUnknown	1			10	5.3	24.1	4.3	2.5	7.1	2.33	2.12	3.39	2.12	1.3859	1	0	0.0483	0.815	0	0	0	0	#N/A	2.3296	0
Tb927.10.6280	N-terminal glutamine amidase, putative	ZUnknown	1.86			60.2	96	68	27.8	24.4	21.2	2.17	3.93	3.21	2.17	1.6338	1	0	-0.0219	0.876	0	0	0	0	#N/A	-0.293	0
Tb927.11.9380	hypothetical protein	ZUnknown	1			11.9	10.7	32.2	4.6	5.1	6.6	2.59	2.1	4.88	2.1	1.6736	1	0	0.3675	0.0268	1	0	0	0	#N/A	-0.092	0
Tb927.4.5060	hypothetical protein	ZUnknown	1			7.3	16.4	38.7	3.5	6.1	6.9	2.09	2.69	5.61	2.09	1.7922	1	0	1.432	7.95e-31	1	1	1	0	#N/A	1.0476	0
Tb927.10.4400	hypothetical protein, conserved, no domains, kinetoplastid specific	ZUnknown	2.05			86.5	155.8	53	36.5	23.9	10.1	2.37	6.52	5.25	2.37	2.2367	1	0	0.3349	0.00486	1	0	0	0	#N/A	0.4056	0
Tb927.8.5920	hypothetical protein	ZUnknown	1			6.2	4.3	18.1	1.1	1.4	3.1	5.64	3.07	5.84	3.07	2.278	1	0	0.3356	0.138	0	0	0	0	#N/A	0.5813	0
Tb927.3.700	hypothetical protein, conserved, no clear yeast or human matches	ZUnknown	1			183.2	486.8	45.1	74.9	42.3	13.2	2.45	11.51	3.42	2.45	2.5344	1	0	0.0852	0.632	0	0	0	0	#N/A	0.0918	0
Tb927.9.2840	Fam77 cell surface phylome protein	ZUnknown	58.81			1594.9	2659.4	1334.7	676.5	362.7	168.8	2.36	7.33	7.91	2.36	2.5525	1	0	0.7397	1.66e-09	1	1	1	0	#N/A	0.2126	0
Tb927.8.5340	hypothetical protein	ZUnknown	1			15.9	6.7	12.9	5.3	1.3	1.2	3	5.15	10.75	3	2.6554	1	0	-0.5692	0.199	0	0	0	0	#N/A	0.1165	0
Tb927.7.6010	hypothetical protein	ZUnknown	1.94			10.1	8.6	23	2.8	1.6	2.2	3.61	5.38	10.45	3.61	2.696	1	0	-0.1827	0.54	0	0	0	0	#N/A	-0.3658	0
Tb927.10.6420	hypothetical protein	ZUnknown	1.92			20.3	52	22.9	6	5.6	3.1	3.38	9.29	7.39	3.38	2.7413	1	0	-0.4873	0.0175	1	0	0	0	#N/A	-0.0534	0
Tb927.5.3180	hypothetical protein, conserved	ZUnknown	1			72.5	207.4	75.1	19.2	14.2	10.9	3.78	14.61	6.89	3.78	3.075	1	0	-0.0049	0.98	0	0	0	0	#N/A	0.164	0
Tb927.10.2450	hypothetical protein	ZUnknown	1			18.3	20.2	40.9	5.1	2.2	2.7	3.59	9.18	15.15	3.59	3.2183	1	0	-0.3216	0.204	0	0	0	0	#N/A	0.5093	0
Tb927.10.9550	hypothetical protein	ZUnknown	1			3.9	14.3	10.8	1.3	0.6	1.3	3	23.83	8.31	3	3.5501	1	0	0.9328	0.0683	0	0	0	0	#N/A	-1.0368	0
Tb927.10.14050	hypothetical protein	ZUnknown	1			94.5	507.5	26.1	18.7	17.3	5.2	5.05	29.34	5.02	5.02	3.7155	1	0	-0.5074	0.0684	0	0	0	0	#N/A	-0.4852	0
Tb927.3.5080	PSP1 C-terminal conserved region, putative	ZUnknown	1	5085	3004	77.6	96.8	306.5	46.9	41.3	75.3	1.65	2.34	4.07	1.65	1.4258	0	0	0.3472	9.62e-08	1	0	0	0	1.39	0.4517	0	5.95	2.7463
Tb927.10.15260	leucine-rich repeat protein (LRRP)	LRRP	2.75			62.6	46.6	272.1	45.7	36.7	79.7	1.37	1.27	3.41	1.27	1.012	0	0	0.1542	0.0119	1	0	0	0	#N/A	-0.137	0	5.74	2.5993
Tb927.3.3730	ABC transporter, putative	Transporter	1	7684	731	99	29.8	649.1	82.1	37.8	133.5	1.21	0.79	4.86	0.79	1.1932	0	0	0.3734	5.99e-13	1	0	0	0	1.04	-0.4593	0	5.54	2.6645
Tb927.8.4200	hypothetical protein, conserved, no domains, no yeast.human match	ZUnknown	1	7477	4629	59.5	34.1	501.6	51.1	29	42.8	1.16	1.18	11.72	1.16	2.2286	0	0	0.4915	1.69e-16	1	0	0	0	1.35	-1.6811	1	5.1	2.6088
Tb927.11.6890	DNA repair and recombination helicase protein PIF1	Mito.DNA	1.03	3587	450	163.8	159.1	642.3	113.8	54.6	87.4	1.44	2.91	7.35	1.44	1.9635	0	0	-0.0862	0.133	0	0	0	0	1.01	-0.4681	0	5.07	2.4568
Tb927.7.2680	ZC3H22	RNA.binding	1			42	40.9	462.6	22.8	24.9	46.6	1.84	1.64	9.93	1.64	2.1603	0	0	0.2381	2.81e-05	1	0	0	0	#N/A	0.5521	0	4.97	2.5135
Tb927.11.5900	hypothetical protein, conserved	ZUnknown	1	3112	1934	48.5	21	49.3	35.2	22.3	22.5	1.38	0.94	2.19	0.94	0.5882	0	0	-0.2421	0.0659	0	0	0	0	0.93	-0.2687	0	4.86	2.4005
Tb927.4.4230	RBP31	RNA.binding	1	6606	3526	87.2	56.1	371.7	55.5	29.4	45.9	1.57	1.91	8.1	1.57	1.9486	0	0	0.3562	6.41e-08	1	0	0	0	1.45	0.1067	0	4.8	2.441
Tb927.5.2000	hypothetical protein copurifies with MKT1 & XAC1, one Q8, salivaria & stercoraria only, well translated only in bloodstream forms	ZUnknown	1	4566	2954	193.3	198.9	514.2	152.7	144	109.6	1.27	1.38	4.69	1.27	1.2908	0	0	-1.1208	5.87e-82	1	0	0	1	1.17	0.2587	0	4.8	2.4141
Tb927.11.10610	hypothetical protein, conserved	ZUnknown	1	3255	366	132.5	98.2	434.8	94.2	67	107.8	1.41	1.47	4.03	1.41	1.2037	0	0	-0.0926	0.147	0	0	0	0	1.21	0.5308	0	4.72	2.3391
Tb927.11.12620	Glucosidase II beta subunit-like, putative	ZUnknown	1			57.5	45.1	106.7	44.5	39.1	49.1	1.29	1.15	2.17	1.15	0.6198	0	0	0.9596	5.18e-50	1	0	1	0	#N/A	-0.1125	0	4.69	2.3785
Tb927.11.5940	GRESAG 4, putative receptor-type adenylate cyclase	GRESAG	1	5073	1307	84.6	65.8	365	76.3	45.7	73.8	1.11	1.44	4.95	1.11	1.3219	0	0	-1.4039	5e-98	1	0	0	1	1.26	-0.0088	0	4.59	2.4699
Tb927.10.1110	Trypanosome-specific kinesin family 2	Cytoskeleton	1			46.5	23.8	420.2	39.2	28	93	1.19	0.85	4.52	0.85	1.1287	0	0	0.7968	1.46e-52	1	0	1	0	#N/A	0.254	0	4.55	2.4005
Tb927.6.2850	ESAG8-associated protein, putative (PIE8)	ESAG	1	2304	139	48.9	42.6	199.5	29.1	21.7	47	1.68	1.96	4.24	1.68	1.3932	0	0	-0.1492	0.0371	1	0	0	0	1.09	0.4373	0	4.53	2.3813
Tb927.4.2410	Glycosyl hydrolase family 65 central catalytic domain/Haloacid dehalogenase-like hydrolase, putative	ZUnknown	1			55.5	44.6	395	49.1	38	62.2	1.13	1.17	6.35	1.13	1.5277	0	0	1.0591	1.84e-67	1	0	1	0	#N/A	-0.2323	0	4.53	2.4303
Tb927.9.9600	DNA replication licensing factor MCM9	DNA	1			90.1	59.3	469	66.8	52.9	116.2	1.35	1.12	4.04	1.12	1.1177	0	0	0.0335	0.647	0	0	0	0	#N/A	0.4472	0	4.52	2.359
Tb927.3.4830	hypothetical protein	ZUnknown	1	2504	1656	83.8	139.5	97.8	47.8	25.6	21.1	1.75	5.45	4.64	1.75	1.9806	0	0	0.3856	0.000158	1	0	0	0	1.24	0.451	0	4.47	2.2203
Tb927.2.1820	protein kinase, putative	Protein.kinase	1	4770	2588	113.7	58.7	431.1	83.2	41.7	54.7	1.37	1.41	7.88	1.37	1.8292	0	0	0.6732	3.09e-36	1	0	1	0	1.33	-1.3114	1	4.45	2.1827
Tb927.6.2030	protein kinase, putative	Protein.kinase	1	7704	5589	144.2	100	1198.8	81.3	62.2	64.1	1.77	1.61	18.7	1.61	2.8797	0	0	-0.1597	0.00985	1	0	0	0	1.17	-3.6028	1	4.44	2.4087
Tb927.8.8320	hypothetical protein, conserved	ZUnknown	1	3926	2506	75.5	109.2	292.3	41.4	32.3	21.4	1.82	3.38	13.66	1.82	2.6523	0	0	-0.8545	2.75e-20	1	0	0	1	0.6	0.4105	0	4.44	2.3561
Tb927.3.950	2OG-Fe(II) oxygenase superfamily, putative	Mito.pathway	1	2881	1360	70.2	115.9	184.7	40.8	48.3	46.7	1.72	2.4	3.96	1.72	1.4294	0	0	-0.0769	0.341	0	0	0	0	1.04	-0.3565	0	4.42	2.1699
Tb927.9.11830	hypothetical protein, conserved, resemblance to myosin	ZUnknown	1	2980	837	123.4	309.7	418.3	98.1	95	116.6	1.26	3.26	3.59	1.26	1.4347	0	0	-0.3123	2.08e-06	1	0	0	0	0.92	-0.2141	0	4.41	2.3161
Tb927.2.2340	Glycerophosphoryl diester phosphodiesterase family, putative	ZUnknown	1	4273	180	95.3	56.7	638	57.6	39.3	74.6	1.65	1.44	8.55	1.44	1.9561	0	0	0.0479	0.434	0	0	0	0	0.97	-0.6309	1	4.4	2.2357
Tb927.5.3760	SPO11 meiotic recombination protein	DNA	1			51.7	35.8	99.1	33.6	20.5	21.4	1.54	1.75	4.63	1.54	1.4005	0	0	0.8178	1.77e-22	1	0	1	0	#N/A	1.9533	0	4.39	2.2265
Tb927.11.6900	DNA repair and recombination helicase protein PIF2	Mito.DNA	1.08			62.6	42.5	228.5	74	62	98.9	0.85	0.69	2.31	0.69	0.3599	0	0	-0.1983	9.32e-05	1	0	0	0	#N/A	-0.313	0	4.3	2.2327
Tb927.4.2590	hypothetical protein, conserved	ZUnknown	1.88	4797	2985	63.8	57.4	207.6	33.3	27.5	41.7	1.92	2.09	4.98	1.92	1.5834	0	0	0.1534	0.0326	1	0	0	0	1.19	-0.4759	0	4.24	2.251
Tb927.3.5160	BBP136	Cytoskeleton	1	4773	462	39.3	18.3	156.3	43.9	42.6	74.9	0.9	0.43	2.09	0.43	0.189	0	0	-0.2005	0.000315	1	0	0	0	1.38	0.0926	0	4.23	2.2296
Tb927.10.2210	ubiquitin carboxyl-terminal hydrolase, Clan CA cysteine peptidase, family C12, putative	Ubiquitin.proteasome	1.48	3465	850	65.9	90.3	336.5	33.4	31	44.1	1.97	2.91	7.63	1.97	2.06	0	0	0.3586	2.46e-05	1	0	0	0	1.2	0.4214	0	4.2	2.2296
Tb927.7.2580	ZC3H19	RNA.binding	1	4346	1775	68.9	62.3	127.3	47.3	32	37.7	1.46	1.95	3.38	1.46	1.1784	0	0	0.1162	0.148	0	0	0	0	1.03	-0.4696	0	4.19	2.1922
Tb927.5.1450	GRESAG 4, putative receptor-type adenylate cyclase	GRESAG	1	4121	313	84.6	70.8	406.9	89	50.1	64.8	0.95	1.41	6.28	0.95	1.5261	0	0	0.243	0.000346	1	0	0	0	1.04	-0.2003	0	4.18	2.373
Tb927.9.12530	DnaJ domain containing protein, putative	ZUnknown	1			107.9	49.8	105.6	45.5	27	48.2	2.37	1.84	2.19	1.84	1.0931	0	0	0.079	0.421	0	0	0	0	#N/A	0.0169	0	4.18	2.144
Tb927.4.2460	kinatase, putative	Enzyme	1.39	6954	2585	82.3	52.1	624.6	78	41.4	85.1	1.06	1.26	7.34	1.06	1.6871	0	0	0.1581	0.00882	1	0	0	0	1.47	-0.0055	0	4.17	2.2203
Tb927.9.4560	RBP32	RNA.binding	1			54.2	63.1	345.8	41.7	30.4	54.2	1.3	2.08	6.38	1.3	1.7019	0	0	0.8133	5.72e-38	1	0	1	0	#N/A	0.0699	0	4.16	2.189
Tb927.2.2920	UAA transporter family, putative	ZUnknown	1			114.7	139.9	150.1	71.8	42.1	29.8	1.6	3.32	5.04	1.6	1.7312	0	0	0.0605	0.5	0	0	0	0	#N/A	0.2868	0	4.15	2.1953
Tb927.3.710	RING-variant domain containing protein, putative	ZUnknown	1	3105	127	385.3	405.5	467.4	345.2	112.6	86.1	1.12	3.6	5.43	1.12	1.7584	0	0	0.0211	0.817	0	0	0	0	1.16	0.1276	0	4.14	2.2869
Tb927.9.8030	hypothetical protein, conserved	ZUnknown	1	2452	754	46.3	71.4	145.6	31.4	28.3	29.2	1.47	2.52	4.99	1.47	1.5818	0	0	0.776	1.98e-21	1	0	1	0	0.99	-0.1812	0	4.13	2.1859
Tb927.7.3730	RBP26	RNA.binding	1	2537	1153	85.1	55.1	317.1	44.9	30.1	40.6	1.9	1.83	7.81	1.83	1.9436	0	0	-0.2451	0.000336	1	0	0	0	1.16	-0.5889	1	4.1	2.189
Tb927.6.3430	NEK10 protein kinase	Protein.kinase	1	3905	1288	49.5	22.9	173.3	31.7	23.8	64.4	1.56	0.96	2.69	0.96	0.7963	0	0	-0.507	1.68e-13	1	0	0	0	1.07	-0.0673	0	4.06	2.1276
Tb927.2.4200	protein kinase, putative	Protein.kinase	1			60.8	37.1	451.3	50.4	30	46.7	1.21	1.24	9.66	1.21	2.0132	0	0	0.6134	1.41e-28	1	0	1	0	#N/A	-1.0013	1	4.06	2.254
Tb927.2.4720	dolichyl-P-Man:GDP-Man7GlcNAc2-PP-dolichyl alpha-1,6-mannosyltransferase, putative	Glycans	1	4773	2484	59.7	49.4	244.2	67.6	37.1	45.4	0.88	1.33	5.38	0.88	1.3391	0	0	-0.5548	1.38e-15	1	0	0	0	0.83	0.2166	0	4.03	2.373
Tb927.6.5090	hypothetical protein, conserved	ZUnknown	1	3835	665	190.3	106.7	303.6	127.7	67.3	93.4	1.49	1.59	3.25	1.49	1.0772	0	0	0.6509	3.1e-23	1	0	1	0	1.42	1.007	0	4.03	2.1859
Tb927.8.6350	CYC11, CYC2-like cyclin	Cell.cycle	1	5620	2670	70.7	34.6	325.6	48.1	28.5	35.4	1.47	1.21	9.2	1.21	1.9855	0	0	0.2658	2.75e-05	1	0	0	0	1.05	0.577	0	4.01	2.4463
Tb927.8.7850	hypothetical protein, conserved	ZUnknown	1.15			128.7	178.6	398.7	92.7	112.2	127.8	1.39	1.59	3.12	1.39	1.0238	0	0	-1.1306	6.65e-15	1	0	0	1	#N/A	0.3577	0	4.01	2.111
Tb927.5.3690	hypothetical protein, conserved	ZUnknown	1	1423	732	31.3	41.7	84.6	29.4	14.6	19.2	1.06	2.86	4.41	1.06	1.4734	0	0	0.0659	0.622	0	0	0	0	0.98	-0.2025	0	4	2.266
Tb927.7.1700	hypothetical protein, conserved	ZUnknown	1.33			152	111.3	140.6	87.8	35.8	33.3	1.73	3.11	4.22	1.73	1.5945	0	0	0.1732	0.0536	0	0	0	0	#N/A	-0.3873	0	3.99	2.1795
Tb927.10.14420	NEK16 protein kinase	Protein.kinase	1	7485	1724	77.4	62	812.6	58	59.8	184.7	1.33	1.04	4.4	1.04	1.1742	0	0	0.146	0.00282	1	0	0	0	1.23	-0.0681	0	3.98	2.0391
Tb927.4.4390	hypothetical protein	ZUnknown	1			57.8	76.7	48.7	35.3	28.8	31.2	1.64	2.66	1.56	1.56	0.9659	0	0	0.5038	5.43e-08	1	0	0	0	#N/A	0.3154	0	3.98	2.0909
Tb927.11.1480	GRESAG 4, putative receptor-type adenylate cyclase	GRESAG	1.72	5946	696	139.4	140.8	684.5	109.2	104.6	122.2	1.28	1.35	5.6	1.28	1.4559	0	0	-0.6289	1.09e-28	1	0	0	1	1.12	0.1648	0	3.97	2.1859
Tb927.7.720	conserved protein	ZUnknown	1	5784	461	28.4	12.6	170.9	35.2	28	74.8	0.81	0.45	2.28	0.45	0.2388	0	0	0.0887	0.142	0	0	0	0	1.06	-0.3357	0	3.97	2.1538
Tb927.8.7830	hypothetical protein, conserved	ZUnknown	1	4120	485	95.9	138.7	455.9	89.7	61.8	86.9	1.07	2.24	5.25	1.07	1.5126	0	0	-1.1936	5.96e-78	1	0	0	1	1.22	0.4817	0	3.96	2.0909
Tb927.11.7390	hypothetical protein, conserved, extremely weak but blast-back positive match to yeast PDH1 which may participate in conversion of 2-methylcitrate to 2-methylisocitrate	Enzyme	1	1766	767	76.6	158.7	117.5	54.4	33.3	31.6	1.41	4.77	3.72	1.41	1.7225	0	0	0.4157	2.04e-05	1	0	0	0	0.96	-0.2228	0	3.95	2.1408
Tb927.11.16360	hypothetical protein, conserved	ZUnknown	1	2323	1185	156.5	188.8	472.2	106.9	53	52	1.46	3.56	9.08	1.46	2.2327	0	0	0.0388	0.605	0	0	0	0	1.14	2.2382	0	3.93	2.1342
Tb927.5.4540	GRESAG 4, putative receptor-type adenylate cyclase	GRESAG	5.88	7751	2616	143.3	135.4	848.1	139.8	98.8	154.4	1.03	1.37	5.49	1.03	1.3951	0	0	-0.0024	0.978	0	0	0	0	1.19	-0.1518	0	3.92	2.319
Tb927.9.12360	RBP35	RNA.binding	1.01			104	61.4	114.3	85.6	58.8	109.7	1.21	1.04	1.04	1.04	0.1331	0	0	-0.3535	7.51e-08	1	0	0	0	#N/A	0.4228	0	3.92	2.1043
Tb927.10.2430	GRESAG 4, putative receptor-type adenylate cyclase	GRESAG	1.5			89.2	58.5	443.8	71.6	53.4	92	1.25	1.1	4.82	1.1	1.257	0	0	1.3224	1.01e-159	1	0	1	0	#N/A	0.5025	0	3.84	2.359
Tb927.10.13890	hypothetical protein, conserved	ZUnknown	1	2570	428	49.8	34.7	88.1	23.9	29.9	33.1	2.08	1.16	2.66	1.16	0.9758	0	0	0.0578	0.546	0	0	0	0	1.03	-0.1862	0	3.83	2.0875
Tb927.10.10800	palmitoyl acyltransferase 2, TbPAT2	Lipids	1			37.4	30.8	111.5	25.4	22	42.5	1.47	1.4	2.62	1.4	0.8718	0	0	0.1891	0.0204	1	0	0	0	#N/A	-0.3021	0	3.82	2.1506
Tb927.4.4590	protein kinase, putative	Protein.kinase	1			27.9	16.3	79.7	21.6	13.7	33.2	1.29	1.19	2.4	1.19	0.7019	0	0	0.0202	0.864	0	0	0	0	#N/A	-0.6093	1	3.81	2.1342
Tb927.2.2720	MEKK1 or FlaK protein kinase, putative	Protein.kinase	1	6871	1952	74.8	64.1	842.6	66.9	60.3	143.2	1.12	1.06	5.88	1.06	1.4258	0	0	0.08	0.154	0	0	0	0	1.53	1.0005	0	3.8	2.1538
Tb927.4.3820	hypothetical protein, conserved	ZUnknown	1			44.9	29.8	80.3	48.7	34.2	50.2	0.92	0.87	1.6	0.87	0.1763	0	0	-0.7461	1.3e-19	1	0	0	1	#N/A	-0.3122	0	3.8	2.0321
Tb927.9.12400	protein kinase, putative	Protein.kinase	1	6469	2029	83.3	50.1	315.3	58.8	36.6	81.1	1.42	1.37	3.89	1.37	1.1549	0	0	-0.2961	2.02e-07	1	0	0	0	0.95	-0.0434	0	3.78	2.0635
Tb927.4.540	hypothetical protein, conserved	ZUnknown	1			246.8	152.6	172.3	153.7	66.9	63.2	1.61	2.28	2.73	1.61	1.1419	0	0	-0.0665	0.413	0	0	0	0	#N/A	0.1409	0	3.78	2.0942
Tb927.8.6490	BBP122	Cytoskeleton	1.02			86.1	53.8	470.6	50.9	33.9	43.4	1.69	1.59	10.84	1.59	2.2347	0	0	0.164	0.0101	1	0	0	0	#N/A	0.1137	0	3.77	2.359
Tb927.9.13430	ubiquitin carboxyl-terminal hydrolase, Clan CA cysteine peptidase, family C12, putative	Ubiquitin.proteasome	1.35	3852	1980	117.6	100.6	543.7	108.1	56.4	55	1.09	1.78	9.89	1.09	2.0886	0	0	-0.6181	5.46e-27	1	0	0	1	0.87	1.2545	0	3.75	2.0144
Tb927.3.4470	hypothetical protein, conserved	ZUnknown	1	1869	260	110.2	69.1	182.2	76.2	40	68.6	1.45	1.73	2.66	1.45	0.961	0	0	-0.0553	0.517	0	0	0	0	0.97	-0.2166	0	3.75	2.1635
Tb927.11.3750	NADH-cytochrome b5 reductase, putative (B5R)	Mito.e.transport	1	1781	626	43.3	42.3	78.8	20.1	25.3	26.9	2.15	1.67	2.93	1.67	1.1699	0	0	0.2913	0.000813	1	0	0	0	1.25	0.0387	0	3.75	2.1859
Tb927.8.1130	protein phosphatase with EF-Hand domains, putative	Protein.phosphatase	1	6939	2002	63.7	41.4	300.6	82.1	49.8	98.7	0.78	0.83	3.05	0.78	0.6354	0	0	0.4993	1.46e-21	1	0	0	0	1.17	-0.6326	1	3.73	2.144
Tb927.3.5190	hypothetical protein, conserved	ZUnknown	1	3666	1049	79.7	102.8	166.7	56.7	43.3	30.6	1.41	2.37	5.45	1.41	1.6214	0	0	0.5669	1.92e-13	1	0	0	0	1.2	0.8735	0	3.73	2.1985
Tb927.10.7040	hypothetical protein, conserved	ZUnknown	1	2324	939	44.9	61.8	163.5	37.4	27	31.6	1.2	2.29	5.17	1.2	1.5294	0	0	0.5993	1.27e-14	1	0	1	0	1.03	-0.492	0	3.7	2.0942
Tb927.11.16260	SPRY domain/HECT-domain (ubiquitin-transferase), putative	ZUnknown	1			39.1	22.8	804.7	71.8	33.2	181.5	0.54	0.69	4.43	0.54	0.9158	0	0	0.2574	7.53e-09	1	0	0	0	#N/A	-0.1594	0	3.7	2.3016
Tb927.9.12790	dolichol kinase, putative	Glycans	1	4098	1637	108.3	82.1	145.8	88.6	44.7	77.4	1.22	1.84	1.88	1.22	0.7195	0	0	0.7146	2.5e-32	1	0	1	0	1.46	-0.0161	0	3.69	2.0635
Tb927.8.4490	hypothetical protein	ZUnknown	1			40.9	58.9	46.5	34.4	42.7	25.1	1.19	1.38	1.85	1.19	0.5591	0	0	0.1747	0.142	0	0	0	0	#N/A	-0.2353	0	3.69	1.9964
Tb927.7.3580	NEK11 protein kinase	Protein.kinase	1			70.9	47.4	304.4	42.8	28.1	50	1.66	1.69	6.09	1.66	1.6538	0	0	0.3427	1.66e-08	1	0	0	0	#N/A	1.1689	0	3.68	2.0036
Tb927.8.7770	aldehyde dehydrogenase family, putative	ZUnknown	1	3664	569	19	9.7	87.2	13.4	13.6	28	1.42	0.71	3.11	0.71	0.8046	0	0	0.0383	0.703	0	0	0	0	1.42	-0.0343	0	3.67	2.251
Tb927.7.3850	hypothetical protein, conserved	ZUnknown	1			27.6	16.2	157.4	30.2	36.4	93.9	0.91	0.45	1.68	0.45	0.0191	0	0	0.0617	0.363	0	0	0	0	#N/A	-0.2896	0	3.66	2.0391
Tb927.11.3330	hypothetical protein, conserved, no yeast or human match	ZUnknown	1			66.2	37.4	304.7	74.6	70	106.3	0.89	0.53	2.87	0.53	0.516	0	0	-0.085	0.165	0	0	0	0	#N/A	-0.1192	0	3.66	2.1795
Tb927.7.7100	hypothetical protein	ZUnknown	1.01	6866	2958	85.3	142	363.4	72	76.6	117	1.18	1.85	3.11	1.18	1.0333	0	0	0.023	0.742	0	0	0	0	1.61	-0.3887	0	3.63	2.0461
Tb927.3.3340	3', 5'-cyclic nucleotide phosphodiesterase, putative (PDED)	Lipids	1	3866	1624	100.8	112.3	242.1	65	42.4	46.3	1.55	2.65	5.23	1.55	1.6523	0	0	0.5594	3.01e-16	1	0	0	0	1.13	-0.0013	0	3.63	1.9964
Tb927.10.6130	hypothetical protein, conserved	ZUnknown	1.96			124.1	76.6	175.1	58.5	58.9	71.3	2.12	1.3	2.46	1.3	0.9709	0	0	-0.4185	6.15e-09	1	0	0	0	#N/A	-0.8376	1	3.6	2.025
Tb927.1.4450	Ion channel/Calcium-activated BK potassium channel alpha subunit, putative	ZUnknown	1			130.4	60.9	455.3	93	56.4	118.3	1.4	1.08	3.85	1.08	1.0772	0	0	0.0407	0.511	0	0	0	0	#N/A	-0.3656	0	3.6	2.0286
Tb927.7.1150	hypothetical protein, conserved	ZUnknown	1			22.6	9.2	216.1	27.7	27.5	92.1	0.82	0.33	2.35	0.33	0.2224	0	0	0.0165	0.802	0	0	0	0	#N/A	-0.2181	0	3.6	2.0909
Tb927.10.12060	hypothetical protein, conserved	ZUnknown	1.19			116.2	79	858	132.7	56.6	119.1	0.88	1.4	7.2	0.88	1.6599	0	0	0.22	1.7e-05	1	0	0	0	#N/A	0.7182	0	3.59	2.0772
Tb927.11.9330	helicase-like protein	DNA	1			14.2	7.7	171.3	21.2	19.4	86.5	0.67	0.4	1.98	0.4	0.0238	0	0	-0.2775	3.51e-07	1	0	0	0	#N/A	-0.5143	0	3.58	2.0215
Tb927.11.13880	kinetoplastid-specific protein tyrosine phosphatase, putative	Protein.phosphatase	1			50.9	53.9	132.1	36.9	21.2	23.7	1.38	2.54	5.57	1.38	1.6614	0	0	0.5642	9.29e-12	1	0	0	0	#N/A	0.1872	0	3.58	2.1375
Tb927.11.15110	Vitamin B6 photo-protection and homoeostasis, putative	ZUnknown	1			47.1	41.1	127.8	58.6	44.2	58.5	0.8	0.93	2.18	0.8	0.3822	0	0	-0.526	9.97e-17	1	0	0	0	#N/A	-0.3693	0	3.58	2.0841
Tb927.10.5420	hypothetical protein, conserved	ZUnknown	1			56	52.7	223.2	68.8	42.1	70.4	0.81	1.25	3.17	0.81	0.8018	0	0	0.311	3.33e-09	1	0	0	0	#N/A	-0.1528	0	3.58	2.1243
Tb927.3.3960	DRBD6A	RNA.binding	1.63	3472	2073	134	158.9	343.2	81.9	47.4	32.8	1.64	3.35	10.46	1.64	2.3646	0	0	1.0878	7.19e-67	1	0	1	0	1.32	1.4672	0	3.57	2.0426
Tb927.8.4260	protein kinase, putative	Protein.kinase	1			101	137.9	280.3	63.3	60.9	77.8	1.6	2.26	3.6	1.6	1.3142	0	0	-0.0417	0.555	0	0	0	0	#N/A	-0.4462	0	3.57	1.9336
Tb927.11.16560	CMP-sialic acid transporter, putative	Glycans	1	2974	1388	155.5	82.7	159.7	108	55.1	108.2	1.44	1.5	1.48	1.44	0.5591	0	0	0.2688	8.23e-06	1	0	0	0	0.91	-0.313	0	3.55	1.9146
Tb927.9.15290	CHAT domain containing protein, putative	ZUnknown	1			114.2	109.1	974.1	186.9	127.4	148.6	0.61	0.86	6.56	0.61	1.4204	0	0	-0.0946	0.128	0	0	0	0	#N/A	-0.3345	0	3.55	2.1985
Tb927.10.5150	ZC3H31	RNA.binding	1.88	2470	114	125.1	106	536.2	68.3	28.9	40.3	1.83	3.67	13.31	1.83	2.6485	0	0	0.6314	2.11e-29	1	0	1	0	0.98	-0.936	1	3.54	2.2203
Tb927.11.8810	hypothetical protein, conserved	ZUnknown	1	1519	146	44.8	82.1	151.3	39.5	53	63.1	1.13	1.55	2.4	1.13	0.7599	0	0	-0.7465	4.07e-25	1	0	0	1	1.07	-0.2041	0	3.54	1.9411
Tb927.10.11630	PSP1 C-terminal conserved region, putative	ZUnknown	1.38	6316	3564	36.4	33.9	324.2	20.8	30.3	34.3	1.75	1.12	9.45	1.12	2.038	0	0	0.2908	2.5e-06	1	0	0	0	1.15	-0.9888	1	3.52	2.1243
Tb927.2.6130	ABC transporter, putative	Transporter	1.14	3275	231	154.4	75.2	314.4	155.6	128.6	157.3	0.99	0.58	2	0.58	0.251	0	0	-0.0218	0.75	0	0	0	0	1	0.1581	0	3.52	1.9598
Tb927.4.3970	hypothetical protein, conserved, kinetoplastid-specific	ZUnknown	1	5383	3854	65.2	44.2	281.3	48.8	27.8	36.1	1.34	1.59	7.79	1.34	1.8373	0	0	-0.1555	0.039	1	0	0	0	1.12	0.4496	0	3.51	2.2172
Tb927.10.9930	PHD-zinc-finger like domain containing protein, putative	ZUnknown	1.39			38.9	21.4	122.9	44.6	41.3	77.9	0.87	0.52	1.58	0.52	-0.0145	0	0	-0.037	0.631	0	0	0	0	#N/A	-0.1925	0	3.51	1.8836
Tb927.8.3190	hypothetical protein, conserved	ZUnknown	1			40.7	80.8	90.2	25.3	26.8	32	1.61	3.01	2.82	1.61	1.3103	0	0	0.1571	0.1	0	0	0	0	#N/A	0.0486	0	3.51	1.9635
Tb927.10.14900	hypothetical protein, conserved	ZUnknown	1	3852	1784	35.7	43.7	203.8	22.2	20.9	23	1.61	2.09	8.86	1.61	2.0658	0	0	0.0667	0.443	0	0	0	0	1.13	1.5959	0	3.5	2.2987
Tb927.1.1310	transmembrane protein, conserved	ZUnknown	2.04	1668	332	86.6	57	103.4	68.6	51	55.9	1.26	1.12	1.85	1.12	0.4957	0	0	0.1263	0.145	0	0	0	0	1.14	-0.2966	0	3.5	1.8875
Tb927.3.850	hypothetical protein, conserved	ZUnknown	1			56.2	70.2	150.3	33.2	28.7	44.5	1.69	2.45	3.38	1.69	1.3258	0	0	0.4128	6.43e-09	1	0	0	0	#N/A	-0.1227	0	3.5	2.0356
Tb927.11.11310	hypothetical protein, conserved	ZUnknown	1			69.5	32.7	136.7	57.3	36.4	69.1	1.21	0.9	1.98	0.9	0.4471	0	0	-0.193	0.00961	1	0	0	0	#N/A	-0.2564	0	3.49	2.0566
Tb927.8.5160	hypothetical protein, conserved	ZUnknown	1	5604	1517	29.6	24.3	265.5	26.4	30.9	52.3	1.12	0.79	5.08	0.79	1.2203	0	0	0.5533	1.53e-20	1	0	0	0	1.1	-0.4903	0	3.48	1.9672
Tb927.11.5570	DNA replication licensing factor MCM5	DNA	1			61.2	52.6	122.5	57.4	43.8	67	1.07	1.2	1.83	1.07	0.4507	0	0	-0.0255	0.77	0	0	0	0	#N/A	-0.2426	0	3.48	1.9222
Tb927.7.5080	ATP-NAD kinase-like protein	Enzyme	2.03	3292	622	50.3	27.8	148.1	63.8	38.5	89.7	0.79	0.72	1.65	0.72	0.075	0	0	0.0646	0.333	0	0	0	0	1.07	-0.2917	0	3.45	2
Tb927.11.8240	TPR repeat, putative	ZUnknown	1			71.4	37.5	158.8	56.7	49.6	82.2	1.26	0.76	1.93	0.76	0.3969	0	0	0.015	0.844	0	0	0	0	#N/A	-0.4721	0	3.45	1.8914
Tb927.1.2710	hypothetical protein, conserved	ZUnknown	1	4245	1564	85	91.9	390.5	58.6	40.8	56.6	1.45	2.25	6.9	1.45	1.821	0	0	-0.7102	1.87e-29	1	0	0	1	1.15	-0.2665	0	3.44	1.9184
Tb927.11.11580	hypothetical protein, conserved	ZUnknown	1	2220	676	51.3	41.1	58.5	47.9	24.4	34	1.07	1.68	1.72	1.07	0.5753	0	0	-0.1538	0.094	0	0	0	0	1.12	-0.4028	0	3.44	1.8639
Tb927.11.12400	hypothetical protein, conserved	ZUnknown	1	4244	2028	74.1	49.8	180.3	55.2	68.5	98.1	1.34	0.73	1.84	0.73	0.3822	0	0	0.2682	3.14e-06	1	0	0	0	1.18	-0.2387	0	3.43	1.8836
Tb927.11.6210	sterol 14-alpha-demethylase (CYP51)	Sterols	1	3200	1507	96.5	37.6	106.6	88.9	47.7	62.8	1.09	0.79	1.7	0.79	0.255	0	0	-0.4941	2.09e-10	1	0	0	0	1	-0.1257	0	3.43	1.9449
Tb927.1.2190	RAPTOR-like (TOR complexes)	Signalling	1	7768	1076	66.4	46.8	577	122.7	153.8	274.2	0.54	0.3	2.1	0.3	-0.0291	0	0	-0.8123	6.55e-58	1	0	0	1	1.38	0.7214	0	3.42	1.8237
Tb927.5.3680	GPI-GlcNAc transferase complex, PIG-H component, putative	ZUnknown	1.21	1464	508	51.6	69.7	127.9	63.3	24.2	33.6	0.82	2.88	3.81	0.82	1.3239	0	0	-0.0619	0.534	0	0	0	0	1.17	-0.0292	0	3.41	2.0391
Tb927.8.5100	hypothetical protein, conserved	Mito.pathway	1			75.1	28.9	495.4	144.8	138.3	298.6	0.52	0.21	1.66	0.21	-0.328	0	0	-0.2281	2.33e-06	1	0	0	0	#N/A	-0.0977	0	3.41	1.9411
Tb927.7.6310	PLK polo-like protein kinase	Protein.kinase	1	4980	1441	84.6	64.5	203	60.7	32	63.5	1.39	2.02	3.2	1.39	1.1397	0	0	0.2262	0.000225	1	0	0	0	1.29	0.2015	0	3.4	1.9107
Tb927.2.5480	hypothetical protein, conserved	ZUnknown	2.02	3595	1213	31.1	38.6	300.3	24.8	38.3	62.2	1.25	1.01	4.83	1.01	1.2408	0	0	-0.0094	0.904	0	0	0	0	1.12	-0.2884	0	3.4	2.0072
Tb927.10.9750	ubiquitin-protein ligase, putative (upl3)	Ubiquitin.proteasome	1.26	8359	2633	108	87.7	744.9	183.4	123.1	223.2	0.59	0.71	3.34	0.59	0.6292	0	0	-0.0965	0.0314	1	0	0	0	1.35	0.2637	0	3.39	1.8797
Tb927.10.13690	hypothetical protein, conserved	ZUnknown	2.35			183	64.5	693.5	105.8	52.7	122.6	1.73	1.22	5.66	1.22	1.5211	0	0	0.0332	0.666	0	0	0	0	#N/A	-0.2793	0	3.39	2.0321
Tb927.10.13040	ACP4, GRESAG 4-like	GRESAG	1.03	5208	1388	101	46.8	267.2	100.1	109.8	155.3	1.01	0.43	1.72	0.43	0.075	0	0	0.2417	1.16e-05	1	0	0	0	0.97	0.1321	0	3.38	2.0807
Tb927.8.1720	phosphatidylglycerolphosphate synthase, mitochondrial	Lipids	1	2862	932	82.1	119.6	323.7	58.5	53.2	96.3	1.4	2.25	3.36	1.4	1.2245	0	0	0.1998	0.00223	1	0	0	0	1.3	0.4381	0	3.38	1.9635
Tb927.11.6120	ABC transporter, putative	Transporter	1.06	7037	1758	176.1	146.3	1023	345.7	130.1	221.1	0.51	1.12	4.63	0.51	1.0612	0	0	-0.4293	2.02e-19	1	0	0	0	1.6	0.4858	0	3.35	2.0635
Tb927.6.1550	POMP30 leucine-rich repeat protein (LRRP)	LRRP	1	2369	1028	86.2	77.1	78.7	45.4	51	64.1	1.9	1.51	1.23	1.23	0.6292	0	0	-0.6994	6.72e-24	1	0	0	1	1.06	0.4272	0	3.35	1.7866
Tb927.1.1930	TOR4 protein kinase = TOR-like 2	Protein.kinase	1	12726	3341	103	60.7	807.3	243.6	190.7	523.7	0.42	0.32	1.54	0.32	-0.3959	0	0	-0.7671	6.2e-57	1	0	0	1	0.87	0.4473	0	3.33	1.7991
Tb927.8.4700	AAT5 Arginine transporter	Amino.acid.transport	6.11	3193	1730	431.7	472.4	1106.2	458.3	213.4	145.4	0.94	2.21	7.61	0.94	1.8426	0	0	0.8891	6.38e-11	1	0	1	0	3.98	0.5483	0	3.33	2.1309
Tb927.11.1170	hypothetical protein, conserved	ZUnknown	1			93	70.8	307	55.4	46.1	86.3	1.68	1.54	3.56	1.54	1.1763	0	0	0.4919	1.1e-17	1	0	0	0	#N/A	0.5245	0	3.33	1.8639
Tb927.8.940	hypothetical protein, conserved, no clear yeast or human matches	ZUnknown	2.07	7731	226	246.9	65.9	1048.2	279.5	262	609.5	0.88	0.25	1.72	0.25	-0.074	0	0	-0.3698	1.09e-18	1	0	0	0	1.05	-0.0949	0	3.32	1.9486
Tb927.11.16420	Methyltransferase TYW3, putative	ZUnknown	1			16.7	7.1	48.3	8.5	12.7	23.8	1.96	0.56	2.03	0.56	0.6009	0	0	0.0095	0.936	0	0	0	0	#N/A	-0.275	0	3.32	1.903
Tb927.11.9770	hypothetical protein, conserved	ZUnknown	1	3052	2431	43	65.4	126	34.2	24.3	28	1.26	2.69	4.5	1.26	1.494	0	0	-0.1304	0.227	0	0	0	0	1.18	-0.281	0	3.31	1.903
Tb927.11.14930	hypothetical protein, conserved	ZUnknown	1	3024	828	111.8	100.6	247.6	62.2	54.7	82.9	1.8	1.84	2.99	1.8	1.144	0	0	-0.0251	0.737	0	0	0	0	0.92	-0.2158	0	3.31	1.856
Tb927.6.920	helicase, putative	DNA	1			26.4	8	161.7	39.7	23.8	72.5	0.66	0.34	2.23	0.34	0.1066	0	0	0.0955	0.108	0	0	0	0	#N/A	-0.475	0	3.31	2.0179
Tb927.10.15240	hypothetical protein, conserved	ZUnknown	1.56			49.9	31.4	215.4	58.8	58.3	147.8	0.85	0.54	1.46	0.54	-0.074	0	0	0.0463	0.455	0	0	0	0	#N/A	-0.1024	0	3.31	1.8992
Tb927.11.16800	hypothetical protein, conserved	ZUnknown	1			107.6	104.3	338.4	87.4	68.3	88.3	1.23	1.53	3.83	1.23	1.1353	0	0	-0.0312	0.679	0	0	0	0	#N/A	-0.2915	0	3.3	2.0215
Tb927.10.6220	XRND	RNA.degradation	1	2888	443	91.4	102	244.2	121.8	81.8	92.4	0.75	1.25	2.64	0.75	0.6292	0	0	-0.2382	4.11e-05	1	0	0	0	1.12	-0.1599	0	3.29	1.7908
Tb927.7.4200	hypothetical protein, conserved	ZUnknown	1	1529	389	54.5	91.7	112	32.3	31.7	31.8	1.69	2.89	3.52	1.69	1.433	0	0	0.3495	0.000124	1	0	0	0	1.13	-0.2752	0	3.29	1.9819
Tb927.4.4180	hypothetical protein, conserved	Cytoskeleton	1			40.7	32.7	162.1	40.3	51.4	82.7	1.01	0.64	1.96	0.64	0.267	0	0	-0.3675	5.89e-08	1	0	0	0	#N/A	0.0459	0	3.29	1.926
Tb927.10.11620	calcium-transporting ATPase, putative	Ions	1.71			62.1	34.6	198.4	78.5	54.7	83.1	0.79	0.63	2.39	0.63	0.3448	0	0	0.1019	0.113	0	0	0	0	#N/A	-0.2636	0	3.29	1.9891
Tb927.11.9750	Protein of unknown function (DUF498/DUF598), putative	Mito.pathway	1			52.6	41.3	127.7	59.4	60.8	85	0.89	0.68	1.5	0.68	0.0333	0	0	-0.2476	0.000266	1	0	0	0	#N/A	-0.1365	0	3.29	1.856
Tb927.7.4830	Kinesin-12	Cytoskeleton	2.08			47.4	47.4	121.4	36.6	38.8	47.5	1.3	1.22	2.56	1.22	0.7599	0	0	0.0829	0.356	0	0	0	0	#N/A	0.0786	0	3.28	1.9598
Tb927.8.5110	hypothetical protein, conserved	ZUnknown	1	6131	2380	116.1	129.2	1309.3	132.6	110.9	174.9	0.88	1.17	7.49	0.88	1.669	0	0	-0.0941	0.05	0	0	0	0	0.88	0.1415	0	3.27	1.9222
Tb927.7.5590	Domain of unknown function (DUF3883), putative	ZUnknown	1	5777	810	115.2	31.4	437.3	131.1	84.5	181.9	0.88	0.37	2.4	0.37	0.2829	0	0	-0.4792	9.76e-25	1	0	0	0	1.03	-0.0587	0	3.27	1.8074
Tb927.3.1090	U1-24K small nuclear ribonucleoprotein	RNA.processing	1	1479	836	31.2	25.6	48.8	15	22.5	20.4	2.08	1.14	2.39	1.14	0.903	0	0	-0.1031	0.423	0	0	0	0	0.78	-0.0646	0	3.27	1.7782
Tb927.2.2260	ATM kinase	Signalling	1			55.5	55.9	656.2	123.7	95.8	327.8	0.45	0.58	2	0.45	0.0144	0	0	0.4857	1.51e-26	1	0	0	0	#N/A	0.0738	0	3.26	1.8156
Tb927.11.3270	squalene monooxygenase, putative	Sterols	1			97	43.9	202.6	76.8	53.4	79.7	1.26	0.82	2.54	0.82	0.6229	0	0	0.3913	2.13e-08	1	0	0	0	#N/A	-0.1245	0	3.26	1.9146
Tb927.7.3130	hypothetical protein, conserved	ZUnknown	1			61.3	47.2	180	36.9	66.6	101.9	1.66	0.71	1.77	0.71	0.4647	0	0	0.0081	0.915	0	0	0	0	#N/A	-0.32	0	3.26	1.7698
Tb927.5.3480	hypothetical protein, conserved	ZUnknown	1			21.8	16.2	93	12.7	19.8	37.8	1.72	0.82	2.46	0.82	0.737	0	0	0.316	5.81e-05	1	0	0	0	#N/A	-0.1219	0	3.26	1.9069
Tb927.5.2360	hypothetical protein, conserved	ZUnknown	1.7	5579	3159	104.5	76.7	589.7	64.3	41.8	35.2	1.63	1.83	16.75	1.63	2.752	0	0	0.7974	1.7e-42	1	0	1	0	1.1	-0.5576	0	3.25	2.067
Tb927.10.15020	YAK protein kinase	Protein.kinase	1.6	4885	1340	109.8	59.2	642.8	109.5	80.7	144.1	1	0.73	4.46	0.73	1.045	0	0	-0.1408	0.00401	1	0	0	0	1.07	-1.1288	1	3.25	1.7442
Tb927.9.2220	SUMO1/Ulp2, putative	Ubiquitin.proteasome	1			174.9	135.8	333.4	113.8	107.8	97.6	1.54	1.26	3.42	1.26	1.052	0	0	0.2554	8.38e-05	1	0	0	0	#N/A	0.4851	0	3.25	2.0356
Tb927.11.13790	hypothetical protein, conserved	ZUnknown	1			57.5	48.3	56.6	43.3	24.3	24.9	1.33	1.99	2.27	1.33	0.8979	0	0	0.3215	0.00134	1	0	0	0	#N/A	0.4228	0	3.25	1.8359
Tb927.6.860	hypothetical protein	ZUnknown	1	4670	1125	90.7	54.2	475.2	49.2	32.9	51.6	1.84	1.65	9.21	1.65	2.0818	0	0	0.0745	0.276	0	0	0	0	1.28	-0.3134	0	3.24	2.0531
Tb927.10.10100	hypothetical protein, conserved	ZUnknown	1	3020	421	34	23.4	122.9	35.8	35.6	75.8	0.95	0.66	1.62	0.66	0.1066	0	0	0.1113	0.105	0	0	0	0	1.04	-0.3317	0	3.24	1.8836
Tb927.7.6220	protein kinase, putative	Protein.kinase	1	2970	49	64.2	47.5	526.7	58.4	38.7	66.8	1.1	1.23	7.88	1.1	1.7669	0	0	0.1464	0.0184	1	0	0	0	1.17	-0.2846	0	3.24	1.8156
Tb927.4.1620	phosphatidylinositol 4-phosphate 5-kinase alpha (PIPKA)	Signalling	1	2217	700	28.5	17.3	78.5	30.3	27.6	50.7	0.94	0.63	1.55	0.63	0.0566	0	0	0.2113	0.00303	1	0	0	0	1.12	-0.508	0	3.24	1.8953
Tb927.11.3200	Histone methylation protein DOT1, putative	ZUnknown	1			93.7	55.8	75.4	48.1	39.3	42.2	1.95	1.42	1.79	1.42	0.7824	0	0	0.1105	0.232	0	0	0	0	#N/A	-0.15	0	3.24	1.757
Tb927.5.650	GRESAG 4, putative receptor-type adenylate cyclase	GRESAG	1.17	6443	1922	38.6	44.6	415.4	41.6	33.4	37.7	0.93	1.34	11.02	0.93	2.1473	0	0	0.7082	1.13e-27	1	0	1	0	1.54	-0.3181	0	3.23	2.0496
Tb927.4.2500	eIF2K2 eukaryotic translation initiation factor 2-alpha kinase	Protein.kinase	1	6090	1960	178.1	137.6	992.8	160.7	112.8	201.8	1.11	1.22	4.92	1.11	1.273	0	0	0.591	2.77e-41	1	0	1	0	2.23	1.5915	0	3.23	1.7312
Tb927.8.3080	hypothetical protein, conserved	ZUnknown	1	4285	168	28.1	9.2	194.3	36.9	42	97	0.76	0.22	2	0.22	-0.0097	0	0	-0.0421	0.587	0	0	0	0	1.14	-0.4954	0	3.23	2.0772
Tb927.11.8450	Amastin surface glycoprotein, putative	Membrane.protein	1	2312	1247	68.8	41.2	75.5	39.9	22.4	38.6	1.72	1.84	1.96	1.72	0.8797	0	0	0.3921	5e-06	1	0	0	0	1.47	0.2971	0	3.23	1.7782
Tb927.10.10440	mitochondrial carrier protein, MCP8	Mito.transport	2.03	1606	459	102.5	89.3	337	63.3	32.9	52.9	1.62	2.71	6.37	1.62	1.8346	0	0	-0.1699	0.0761	0	0	0	0	0.98	-0.117	0	3.23	1.8953
Tb927.4.2650	Regulator of chromosome condensation (RCC1) repeat, putative	ZUnknown	1	3322	1684	62.8	45.6	131	61.7	36.4	38.3	1.02	1.25	3.42	1.02	0.9235	0	0	-0.2508	0.000636	1	0	0	0	1.05	-0.3439	0	3.22	2.0356
Tb927.10.12400	membrane transporter protein, putative	Transporter	1	1920	413	78.4	85.2	112	61.8	41.7	44.9	1.27	2.04	2.49	1.27	0.9511	0	0	0.0171	0.879	0	0	0	0	1.04	-0.0599	0	3.22	1.844
Tb927.8.6380	hypothetical protein, conserved	ZUnknown	1			76	46.1	39.6	74.9	48.7	44	1.01	0.95	0.9	0.9	-0.0689	0	0	-0.4516	8.03e-07	1	0	0	0	#N/A	0.0624	0	3.22	1.7698
Tb927.8.5850	hypothetical protein, conserved	ZUnknown	1			82.7	33.3	742.6	184.3	113.9	468.3	0.45	0.29	1.59	0.29	-0.3646	0	0	0.1581	5.54e-05	1	0	0	0	#N/A	-0.0118	0	3.22	1.8953
Tb927.11.6240	hypothetical protein, conserved, 2 weak RBDs, no yeast or human match	RNA.binding	1			32.6	38.1	283.6	21.5	26.4	41.6	1.52	1.44	6.82	1.44	1.7049	0	0	-0.3505	1.88e-05	1	0	0	0	#N/A	0.1257	0	3.21	1.926
Tb927.11.7400	hypothetical protein, conserved	ZUnknown	1			52.4	24	184.4	56.3	33.9	67.2	0.93	0.71	2.74	0.71	0.546	0	0	0.0564	0.443	0	0	0	0	#N/A	0.1689	0	3.21	1.852
Tb927.11.12490	hypothetical protein, conserved	ZUnknown	1			31.7	35.5	222.7	32.1	25.9	59	0.99	1.37	3.77	0.99	1.0309	0	0	0.2524	0.00017	1	0	0	0	#N/A	-0.029	0	3.21	1.9298
Tb927.8.4050	flagellar membrane protein that interacts with FLA1, similar to FLA3	Membrane.protein	2.06	3046	675	92.3	69.5	184.6	57.2	63.1	98.6	1.61	1.1	1.87	1.1	0.6104	0	0	0.3154	6.93e-08	1	0	0	0	0.99	-0.1543	0	3.2	1.8914
Tb927.11.16310	myosin heavy chain, putative, in MCM-BP-TAP	Cytoskeleton	1	4307	806	51	22.3	426.9	50.2	31.3	83.9	1.02	0.71	5.09	0.71	1.1848	0	0	0.307	4.12e-07	1	0	0	0	1.13	0.4081	0	3.19	1.9598
Tb927.11.4430	ferric reductase, putative,ferric reductase transmembrane component, putative	Enzyme	1	3877	1496	143.1	121.9	343.1	134.2	114.2	132.8	1.07	1.07	2.58	1.07	0.6538	0	0	-0.5411	7.29e-19	1	0	0	0	1.69	0.9554	0	3.19	1.8797
Tb927.11.4340	hypothetical protein, conserved	ZUnknown	1	3306	595	23.8	16.5	61.3	37.9	39.2	55.7	0.63	0.42	1.1	0.42	-0.4806	0	0	-0.0398	0.592	0	0	0	0	1.09	-0.1961	0	3.19	1.9222
Tb927.7.4690	hypothetical protein	ZUnknown	2.47	2729	1718	116.8	244	176.1	81.2	63.3	84	1.44	3.85	2.1	1.44	1.3006	0	0	0.2805	0.000929	1	0	0	0	1.1	-0.0807	0	3.19	1.6871
Tb927.9.11930	DNA-repair protein XPC	DNA	1	2976	583	62.2	37.1	112.2	67.9	50.9	64.3	0.92	0.73	1.74	0.73	0.1763	0	0	0.0813	0.293	0	0	0	0	1.12	-0.2546	0	3.18	1.852
Tb927.8.1650	protein associated with differentiation 4, PAD4	Transporter	1			65.4	43.7	278.2	57.1	23.9	32.2	1.15	1.83	8.64	1.15	1.9536	0	0	0.2245	0.0033	1	0	0	0	#N/A	-0.2546	0	3.17	2.1309
Tb927.7.5390	hypothetical protein, conserved	ZUnknown	1			162.8	242.6	426.2	133	75.8	87.1	1.22	3.2	4.89	1.22	1.6338	0	0	0.2801	3.4e-06	1	0	0	0	#N/A	-0.0257	0	3.17	1.9069
Tb927.9.11690	hypothetical protein, conserved	ZUnknown	1	2758	749	39.6	19.7	100.6	25.2	18.5	37.2	1.57	1.06	2.7	1.06	0.8292	0	0	-0.0034	0.972	0	0	0	0	1.09	-0.2079	0	3.16	1.8156
Tb927.11.11800	DNA repair and recombination helicase protein PIF3	Mito.DNA	1	2856	529	67	68	243.9	67.4	41	61.3	0.99	1.66	3.98	0.99	1.144	0	0	0.4569	6.55e-15	1	0	0	0	1.26	-0.0399	0	3.15	1.8156
Tb927.9.12500	POMP7	Mito.membrane	1.99	2414	700	110.5	222.2	108.9	61.4	45.6	42.4	1.8	4.87	2.57	1.8	1.6229	0	0	0.2858	0.000603	1	0	0	0	1.12	-0.1656	0	3.15	1.848
Tb927.8.4350	hypothetical protein, conserved	ZUnknown	1.33			31.1	15.9	184.9	35.6	21.8	47.7	0.87	0.73	3.88	0.73	0.8692	0	0	-0.1603	0.022	1	0	0	0	#N/A	-0.2919	0	3.15	1.8758
Tb927.11.4990	kinetoplastid-specific phospho-protein phosphatase, putative	Protein.phosphatase	1	3196	647	104.5	104	310.4	78.1	55.7	63.5	1.34	1.87	4.89	1.34	1.433	0	0	0.496	1.38e-14	1	0	0	0	0.95	-0.524	0	3.14	1.9184
Tb927.10.9620	NADH-ubiquinone oxidoreductase c	Mito.e.transport	1			70.5	69.2	141.5	69.8	24	18.2	1.01	2.88	7.77	1.01	1.9585	0	0	-0.3113	0.0102	1	0	0	0	#N/A	-0.6745	1	3.14	1.7527
Tb927.10.7540	VRR-NUC domain containing protein, putative	ZUnknown	1.32			43.7	18.1	233.7	59.8	38.3	97.3	0.73	0.47	2.4	0.47	0.263	0	0	0.2707	2.17e-06	1	0	0	0	#N/A	-0.4909	0	3.14	1.7655
Tb927.1.1600	pseudouridine synthase TruD, putative	rRNA.tRNA.process	1.32			45.7	15.3	198.5	36.8	34.6	89	1.24	0.44	2.23	0.44	0.3822	0	0	-0.4561	1.22e-16	1	0	0	0	#N/A	0.0429	0	3.13	1.7049
Tb927.11.14640	hypothetical protein, conserved	ZUnknown	1			34.1	28.7	102.3	37.2	40.8	60.2	0.92	0.7	1.7	0.7	0.1462	0	0	0.1514	0.0295	1	0	0	0	#N/A	-0.223	0	3.13	1.856
Tb927.8.3540	hypothetical protein, conserved	ZUnknown	1.27	4105	493	59.2	22.1	250.2	64.5	55	202.6	0.92	0.4	1.23	0.4	-0.2345	0	0	-0.2675	2.9e-08	1	0	0	0	0.94	0.0798	0	3.12	1.844
Tb927.11.12350	DNA photolyase, putative	DNA	1	2928	164	32.5	16.1	104.6	31.3	32.9	47.2	1.04	0.49	2.22	0.49	0.3219	0	0	0.2177	0.00173	1	0	0	0	1.09	-0.2104	0	3.12	2.0286
Tb927.4.350	hypothetical protein, conserved	ZUnknown	1	2170	588	49.3	12.5	99.2	46.8	13.7	42.8	1.05	0.91	2.32	0.91	0.5126	0	0	-0.2373	0.0042	1	0	0	0	0.94	-0.3798	0	3.12	1.9598
Tb927.8.4360	hypothetical protein, conserved	ZUnknown	1			79.5	89.9	260.9	64.9	116.7	159.2	1.22	0.77	1.64	0.77	0.275	0	0	0.1696	0.0016	1	0	0	0	#N/A	0.12	0	3.12	1.8639
Tb927.5.3150	protein kinase , putative	Protein.kinase	1	6256	1138	82.3	40.7	224.6	110.5	130.3	253.4	0.74	0.31	0.89	0.31	-0.6289	0	0	-0.0584	0.281	0	0	0	0	1.13	-0.2548	0	3.11	1.8156
Tb927.7.4090	serine/threonine-protein kinase, putative	Protein.kinase	1	3372	966	41.3	31.5	204	34.2	27.8	66.9	1.21	1.13	3.05	1.13	0.8453	0	0	0.2385	2.53e-05	1	0	0	0	1.28	0.0299	0	3.11	1.6645
Tb927.8.8350	mitotic centromere-associated kinesin (MCAK), putative	Cell.cycle	1.28	2881	365	105.9	124.8	455.1	55.8	45.5	78.6	1.9	2.74	5.79	1.9	1.7977	0	0	-0.7595	1.11e-32	1	0	0	1	1.18	-0.2648	0	3.11	1.7655
Tb927.11.16270	DNAexcision repair helicase XPBR	DNA	1	3492	927	62.9	63.4	184.6	54.3	67.4	94.5	1.16	0.94	1.95	0.94	0.433	0	0	0.0351	0.604	0	0	0	0	1.24	-0.1884	0	3.1	1.7442
Tb927.8.2610	5-methyltetrahydropteroyltriglutamate-homocysteine S-methyltransferase, putative	Folate	1			35.7	21.7	110.4	37.6	34.1	77.6	0.95	0.64	1.42	0.64	0.0048	0	0	0.0898	0.232	0	0	0	0	#N/A	-0.195	0	3.1	1.757
Tb927.10.1910	protein kinase, putative,serine/threonine protein kinase, putative	Protein.kinase	1.15			86.2	39.3	403.9	106.7	81.5	208.6	0.81	0.48	1.94	0.48	0.1066	0	0	0.3075	7.44e-10	1	0	0	0	#N/A	-0.4515	0	3.1	1.844
Tb927.10.6620	hypothetical protein, conserved, no domains	ZUnknown	1.75			31.3	25.1	78.3	27.9	26.3	32.7	1.12	0.95	2.39	0.95	0.5721	0	0	0.2042	0.0149	1	0	0	0	#N/A	0.3716	0	3.1	2
Tb927.8.5390	CRK4 cdc2- like protein kinase	Cell.cycle	1			19.5	20.7	56.5	7.4	15	22.9	2.64	1.38	2.47	1.38	1.1133	0	0	0.5969	2.06e-08	1	0	1	0	#N/A	-0.0838	0	3.09	1.8836
Tb927.3.5140	exonuclease, putative	ZUnknown	1	4219	1472	67.9	37.7	196.9	45.9	28.5	56	1.48	1.32	3.52	1.32	1.075	0	0	0.0007	0.993	0	0	0	0	1.09	-0.0658	0	3.08	1.7698
Tb927.9.2350	serine/threonine protein kinase, putative	Protein.kinase	1	3222	195	167.7	201.1	773.4	136.4	117.3	201.1	1.23	1.71	3.85	1.23	1.1784	0	0	0.2962	8.13e-09	1	0	0	0	1.06	-0.1979	0	3.08	1.9523
Tb927.10.12310	helicase-like protein	DNA	1			86.1	53.2	177.4	93.4	62.4	103.2	0.92	0.85	1.72	0.85	0.2183	0	0	-0.1253	0.0443	1	0	0	0	#N/A	-0.1703	0	3.08	1.8032
Tb927.11.16820	hypothetical protein, conserved	ZUnknown	1	6975	4111	62.8	48	245.1	56	34.3	27.8	1.12	1.4	8.82	1.12	1.9184	0	0	0.0907	0.28	0	0	0	0	1.8	2.5577	0	3.07	2.0635
Tb927.8.5500	protein kinase, putative	Protein.kinase	1	2895	762	74.3	39.3	99.7	68.4	53.9	66.2	1.09	0.73	1.51	0.73	0.1506	0	0	-0.0459	0.548	0	0	0	0	1	-0.0409	0	3.07	1.7527
Tb927.10.11040	hypothetical protein, conserved	ZUnknown	1	2768	423	33.2	42.6	130.6	39.6	46.7	52.2	0.84	0.91	2.5	0.84	0.5025	0	0	0.013	0.884	0	0	0	0	1.04	-0.2159	0	3.07	1.926
Tb927.11.2680	ATP synthase regulation protein NCA2, putative	ZUnknown	1	2359	240	69.8	43.6	131.5	56.4	36	33.5	1.24	1.21	3.93	1.21	1.0886	0	0	-0.2109	0.0128	1	0	0	0	0.99	-0.3221	0	3.07	1.8197
Tb927.5.1650	serine/threonine-protein kinase, putative,protein kinase, putative	Protein.kinase	1			156.2	140.6	261	136.5	93.7	103	1.14	1.5	2.53	1.14	0.7852	0	0	-0.0639	0.33	0	0	0	0	#N/A	0.2524	0	3.07	1.8237
Tb927.6.870	myotubularin, putative	Cytoskeleton	1.19	6784	1309	82.6	69.6	707	120	97.6	229.6	0.69	0.71	3.08	0.69	0.5785	0	0	0.5071	1.93e-33	1	0	0	0	1.29	0.431	0	3.06	1.7698
Tb927.7.6300	WD domain, G-beta repeat, putative	ZUnknown	1	3580	1215	55.5	30	190	36	18.5	13.1	1.54	1.62	14.5	1.54	2.5575	0	0	0.9991	5.61e-32	1	0	1	0	1.16	0.0443	0	3.06	1.9598
Tb927.9.14260	hypothetical protein, conserved	ZUnknown	1	3034	365	46	21.1	163	57.7	34	77	0.8	0.62	2.12	0.62	0.2388	0	0	0.1595	0.0162	1	0	0	0	1.24	-0.4269	0	3.06	1.86
Tb927.10.3300	Domain of unknown function (DUF4206), putative	ZUnknown	1	2364	707	71.7	109.9	150.5	45	26.5	29.1	1.59	4.15	5.17	1.59	1.8626	0	0	0.2318	0.0151	1	0	0	0	1.08	-0.2716	0	3.06	1.8875
Tb927.9.4640	MKS6	Cytoskeleton	1			23.5	9.2	167.1	41.9	33.5	101.2	0.56	0.27	1.65	0.27	-0.2746	0	0	0.3849	1.28e-16	1	0	0	0	#N/A	-0.2158	0	3.06	1.7908
Tb927.4.1060	hypothetical protein, conserved	ZUnknown	1			42.8	20.7	191.5	47.9	36.2	75.7	0.89	0.57	2.53	0.57	0.4114	0	0	0.1963	0.00107	1	0	0	0	#N/A	-0.2433	0	3.06	1.926
Tb927.10.3360	Unknown function	ZUnknown	1.74			67.3	89.3	466.4	47.3	48.7	77.5	1.42	1.83	6.02	1.42	1.6276	0	0	0.2148	0.00303	1	0	0	0	#N/A	-0.3467	0	3.06	1.9782
Tb927.8.1460	EamA-like transporter family, putative	ZUnknown	1	2135	827	87	77.8	116.2	62.7	50.1	63.8	1.39	1.55	1.82	1.39	0.666	0	0	-0.2082	0.00868	1	0	0	0	0.94	-0.1054	0	3.05	1.7181
Tb927.9.12340	hypothetical protein, conserved	ZUnknown	1.67			109.1	83.7	178.7	79.6	72.7	93.7	1.37	1.15	1.91	1.15	0.5623	0	0	0.1959	0.000806	1	0	0	0	#N/A	-0.062	0	3.05	1.757
Tb927.7.200	hypothetical protein, conserved	ZUnknown	1			52.6	30.9	95.7	25.8	21.4	32.6	2.04	1.44	2.94	1.44	1.0976	0	0	0.6596	1.46e-18	1	0	1	0	#N/A	0.1159	0	3.05	1.7698
Tb927.10.1150	hypothetical protein, conserved	ZUnknown	1.99	3367	146	80	110.2	260.6	82.7	131.8	136.1	0.97	0.84	1.91	0.84	0.3103	0	0	0.0247	0.734	0	0	0	0	1.23	-0.1338	0	3.04	1.7355
Tb927.4.1350	glyoxalase II (glx2-2)	Redox	1	1621	107	35.6	36.2	86.7	27.5	59	79.8	1.29	0.61	1.09	0.61	-0.0048	0	0	0.0678	0.395	0	0	0	0	1.02	0.1143	0	3.04	1.7137
Tb927.11.4690	mitochondrial DNA polymerase I protein B (POLIB)	Mito.DNA	1			83.7	56	234.7	121.6	106.4	162.6	0.69	0.53	1.44	0.53	-0.1735	0	0	-0.0006	0.992	0	0	0	0	#N/A	-0.1056	0	3.04	1.8319
Tb927.9.11770	Fusaric acid resistance protein-like, putative	ZUnknown	1.14			135.5	77.1	330.4	195.4	94.8	168.3	0.69	0.81	1.96	0.69	0.2058	0	0	-0.3977	9.32e-16	1	0	0	0	#N/A	-0.1728	0	3.04	1.8237
Tb927.9.10870	hypothetical protein, conserved	ZUnknown	1	2318	1229	49.8	50	65.9	30.3	38.8	36.5	1.64	1.29	1.81	1.29	0.6599	0	0	0.0372	0.703	0	0	0	0	1.05	-0.2763	0	3.03	1.7908
Tb927.10.6870	short-chain dehydrogenase, putative	Enzyme	1.48			44.8	44.6	109.1	54.2	30.2	52.4	0.83	1.48	2.08	0.83	0.5493	0	0	0.3174	1.09e-05	1	0	0	0	#N/A	-0.1938	0	3.03	1.8278
Tb927.8.4560	hypothetical protein, conserved. pfam08626: TRAPPC9-Trs120 (e-5)	Translation	1			34.7	19.7	166.2	37.5	69.3	118.4	0.93	0.28	1.4	0.28	-0.2009	0	0	-0.1093	0.0727	0	0	0	0	#N/A	-0.2027	0	3.03	1.7181
Tb927.10.3510	tRNA pseudouridine synthase D (TruD), putative	ZUnknown	1.19	5902	466	84.2	47.3	303.2	121.8	100.9	158.1	0.69	0.47	1.92	0.47	0.038	0	0	-0.2915	4.16e-10	1	0	0	0	1.2	0.5348	0	3.02	1.774
Tb927.11.1220	hypothetical protein, conserved	ZUnknown	1	3058	702	49	43.5	151.1	37.1	33.2	53.9	1.32	1.31	2.8	1.31	0.856	0	0	0.0943	0.167	0	0	0	0	1.1	0.4164	0	3.02	1.6826
Tb927.11.5340	protein kinase, putative	Protein.kinase	1	3027	682	68.9	59.7	160.1	36.6	23	50.1	1.88	2.6	3.2	1.88	1.3561	0	0	0.1225	0.112	0	0	0	0	1	-0.4392	0	3.02	1.7442
Tb927.1.4280	hypothetical protein, conserved, African tryp specific, PTZ (tail-specific protease) domain	ZUnknown	1			57	64.6	238.3	41.7	38.9	63.4	1.37	1.66	3.76	1.37	1.1784	0	0	0.1751	0.00338	1	0	0	0	#N/A	-0.296	0	3.02	1.6276
Tb927.4.1320	hypothetical protein, conserved	ZUnknown	1			42.8	29.4	137.7	65.7	65.7	102.1	0.65	0.45	1.35	0.45	-0.2922	0	0	0.2234	4.57e-05	1	0	0	0	#N/A	-0.164	0	3.02	1.7655
Tb927.5.3330	hypothetical protein, conserved	ZUnknown	1.2	15496	1160	102.1	49.9	892.3	186.1	123.7	384.8	0.55	0.4	2.32	0.4	0.1243	0	0	-0.0577	0.164	0	0	0	0	1.01	0.1098	0	3.01	1.7991
Tb927.7.960	protein kinase, putative	Protein.kinase	1	5598	2598	57.1	55.6	629.5	83.3	73.3	180.7	0.69	0.76	3.48	0.69	0.7166	0	0	-0.3524	5.74e-13	1	0	0	0	0.89	-0.6932	1	3.01	1.6736
Tb927.6.4730	hypothetical protein	ZUnknown	1			178.8	296.7	208.5	135.4	61.1	35.9	1.32	4.86	5.81	1.32	1.9988	0	0	0.2063	0.0183	1	0	0	0	#N/A	1.9009	0	3.01	1.6462
Tb927.8.3050	Chitobiase/beta-hexosaminidase C-terminal domain containing protein, putative	ZUnknown	1			69.2	72.4	136.3	78.4	86.2	79.7	0.88	0.84	1.71	0.84	0.1932	0	0	0.2178	0.00239	1	0	0	0	#N/A	-0.0011	0	3.01	1.6915
Tb927.6.640	ALPH1 decapping enzyme	RNA.degradation	1	10625	5626	54.5	41.3	226	47.1	50	102.3	1.16	0.83	2.21	0.83	0.4854	0	0	-0.2835	2.37e-08	1	0	0	0	1.16	-0.2905	0	3	1.6415
Tb927.10.2650	hypothetical protein, conserved	ZUnknown	1.3	4607	913	149.9	110.8	348.5	116.6	113.6	197.8	1.29	0.98	1.76	0.98	0.4258	0	0	-0.1495	0.0137	1	0	0	0	1.49	0.8563	0	3	1.6826
Tb927.8.770	hypothetical protein, conserved	ZUnknown	1	3307	1251	76.6	50.5	116.2	82	65.2	94.2	0.93	0.77	1.23	0.77	-0.0341	0	0	-0.4613	2.52e-12	1	0	0	0	1.37	-0.3843	0	3	1.7949
Tb927.2.3910	beta-ketoacyl synthase family protein, putative	Lipids	1	3158	1458	24.5	20.7	86.4	21	25.8	42.8	1.17	0.8	2.02	0.8	0.4114	0	0	0.1299	0.0797	0	0	0	0	0.82	-0.1964	0	3	1.844
Tb927.5.1070	hypothetical protein, conserved	Cytoskeleton	1.16	2989	118	37.2	26.7	326.9	32.6	40.1	84.6	1.14	0.67	3.86	0.67	0.9184	0	0	0.6063	3.12e-28	1	0	1	0	1.25	0.2485	0	3	1.7049
Tb927.8.4600	Zinc finger, C3HC4 type (RING finger), putative	Zinc.finger	1	1803	702	57	82.6	122.6	35.2	31.7	44.7	1.62	2.61	2.74	1.62	1.2162	0	0	0.4633	1.15e-09	1	0	0	0	1.46	0.1876	0	3	1.6599
Tb927.11.10370	glycosyl hydrolase-like protein	Glycans	1			133.6	66.3	311.6	152.7	121.1	172.4	0.87	0.55	1.81	0.55	0.1066	0	0	-0.2216	1.43e-06	1	0	0	0	#N/A	-0.2268	0	3	1.7268
Tb927.2.2400	glycosyltransferase (GlcNAc), putative	Glycans	1			83	68.7	175.5	63.3	58.4	93.7	1.31	1.18	1.87	1.18	0.5394	0	0	0.072	0.363	0	0	0	0	#N/A	0.8832	0	3	1.8074
Tb927.10.11680	VCL2 Voltage-gated Chloride channel Like ESP20	Vesicular.transport	1			161.5	69.6	255.4	253.2	147.2	208.3	0.64	0.47	1.23	0.47	-0.3585	0	0	0.1147	0.0408	1	0	0	0	#N/A	-0.3481	0	3	1.8156
Tb927.11.12460	hypothetical protein, conserved	ZUnknown	1			22.4	19.5	96.7	29.9	50.2	80.3	0.75	0.39	1.2	0.39	-0.3585	0	0	-0.0378	0.567	0	0	0	0	#N/A	-0.2401	0	3	1.7093
Tb927.4.3470	hypothetical protein, conserved, no yeast or human match	ZUnknown	1			39.9	31	126.6	19	44.1	47.7	2.1	0.7	2.65	0.7	0.8613	0	0	-0.0966	0.241	0	0	0	0	#N/A	-0.0096	0	3	1.9298
Tb927.7.6850	trans-sialidase (TbTS)	Membrane.protein	1.41	3161	698	44.5	45	256	35.4	31.5	56.8	1.26	1.43	4.51	1.26	1.263	0	0	0.8236	9.82e-47	1	0	1	0	1.12	0.4377	0	2.99	1.9146
Tb927.9.6410	Possible TAC component	Mito.DNA	1	3013	773	32.7	14.1	124.4	35.2	27.1	62.4	0.93	0.52	1.99	0.52	0.1974	0	0	0.0413	0.578	0	0	0	0	0.98	-0.3174	0	2.99	1.856
Tb927.7.5540	2,4-dienoyl-coa reductase-like protein	Lipids	1	2302	40	34.8	26.8	200.9	32.4	30.8	63.1	1.07	0.87	3.18	0.87	0.7712	0	0	-0.2459	0.000724	1	0	0	0	1.04	-0.1945	0	2.99	1.848
Tb927.3.2360	hypothetical protein, conserved	ZUnknown	1	1496	16	75.4	130.8	127.3	72.9	53	38.9	1.03	2.47	3.27	1.03	1.1742	0	0	0.3584	0.000606	1	0	0	0	0.61	0.0057	0	2.99	1.7225
Tb927.11.1460	phosphatidylinositol (3,5) kinase, putative	Signalling	1			57.2	29.3	244.6	72.6	76.4	154.9	0.79	0.38	1.58	0.38	-0.1255	0	0	-0.8833	5.78e-63	1	0	0	1	#N/A	-0.359	0	2.99	1.669
Tb927.1.1530	protein kinase, putative	Protein.kinase	1.25	8878	3626	187	172.8	739.5	165.2	140.8	265.2	1.13	1.23	2.79	1.13	0.7796	0	0	-0.286	1.66e-08	1	0	0	0	1.14	0.8229	0	2.98	1.6871
Tb927.11.12870	hypothetical protein, conserved	ZUnknown	1.4	3682	1297	110.1	39.5	305	130.4	53.4	92.8	0.84	0.74	3.29	0.74	0.699	0	0	-0.1086	0.0738	0	0	0	0	1.01	-0.1694	0	2.98	1.8953
Tb927.10.11090	hypothetical protein, conserved	ZUnknown	1.38	2317	138	16.2	13.8	111	20.1	34.7	80.1	0.81	0.4	1.39	0.4	-0.2065	0	0	0.2085	0.000331	1	0	0	0	1.1	-0.1649	0	2.98	1.7225
Tb927.7.750	hypothetical protein, conserved	ZUnknown	1			51.3	32.4	120.5	46.7	51.8	96.2	1.1	0.63	1.25	0.63	-0.0097	0	0	-0.0209	0.775	0	0	0	0	#N/A	0.0984	0	2.98	1.6781
Tb927.9.10190	hypothetical protein, conserved	ZUnknown	1			132.5	98.4	189	98.8	60.2	90.9	1.34	1.63	2.08	1.34	0.7513	0	0	-0.0705	0.36	0	0	0	0	#N/A	-0.3552	0	2.98	1.8953
Tb927.7.3990	mitochondrial DNA polymerase I protein C (TbPOL1C)	Mito.DNA	1	6348	927	62.8	41.4	242.2	68.1	60.1	151.5	0.92	0.69	1.6	0.69	0.0976	0	0	0.1665	0.00148	1	0	0	0	1.41	-0.1359	0	2.97	1.6781
Tb927.7.3650	protein kinase, putative	Protein.kinase	1	4393	811	111.6	118	688.8	73.5	66.8	101.9	1.52	1.77	6.76	1.52	1.7442	0	0	0.1401	0.0156	1	0	0	0	1.03	-0.1356	0	2.97	1.6826
Tb927.11.15600	histone deacetylase 2 (DAC2 or HDAC2)	Chromatin	1	2561	119	36.9	23.7	74.1	32.9	35.4	42.8	1.12	0.67	1.73	0.67	0.2306	0	0	0.0918	0.223	0	0	0	0	0.97	-0.3703	0	2.97	1.7485
Tb927.8.7190	hypothetical protein	ZUnknown	1	2187	1176	22	28.4	41	16	18.7	18.8	1.38	1.52	2.18	1.38	0.7599	0	0	0.313	0.00126	1	0	0	0	1.07	0.0397	0	2.97	1.8156
Tb927.11.8460	amastin-like protein	Enzyme	1	1718	65	129.7	72.5	110	70	57.8	79.2	1.85	1.25	1.39	1.25	0.5818	0	0	-0.5556	2.68e-11	1	0	0	0	1	-0.2029	0	2.97	1.6276
Tb927.4.3030	hypothetical protein, conserved	ZUnknown	1.98	1592	140	42.7	41.5	95.8	27.8	35.7	42.6	1.54	1.16	2.25	1.16	0.7225	0	0	-0.6558	1.82e-19	1	0	0	1	1.1	-0.1444	0	2.97	1.6871
Tb927.4.3020	ATP-dependent DEAH-box RNA helicase, putative	Mito.RNA	2.02			34.2	28.4	167.1	43.8	61.9	126.3	0.78	0.46	1.32	0.46	-0.2288	0	0	-0.7827	5.14e-40	1	0	0	1	#N/A	-0.1058	0	2.97	1.7782
Tb927.7.6430	hypothetical protein	ZUnknown	1			20.5	15	47.9	18.9	12.1	16.5	1.08	1.24	2.9	1.08	0.7991	0	0	0.0152	0.926	0	0	0	0	#N/A	0.2857	0	2.97	1.6415
Tb927.5.830	TAC65	Cytoskeleton	1			30	13.6	56.5	32.9	25.1	35.1	0.91	0.54	1.61	0.54	0.0286	0	0	-0.0497	0.608	0	0	0	0	#N/A	-0.0809	0	2.96	1.852
Tb927.6.1930	SAM domain (Sterile alpha motif), putative	ZUnknown	1			210	165.9	133	198	121.9	82.5	1.06	1.36	1.61	1.06	0.4258	0	0	-0.2468	0.00302	1	0	0	0	#N/A	0.0078	0	2.96	1.6323
Tb927.8.4900	hypothetical protein, conserved	ZUnknown	1.22	3998	35	95.9	64.3	159.3	105.4	76.2	101.4	0.91	0.84	1.57	0.84	0.1462	0	0	-0.1384	0.0495	1	0	0	0	1.44	0.0215	0	2.95	1.5993
Tb927.11.12650	palmitoyl acyltransferase 5, putative	Lipids	1	2302	873	49.1	37.6	93.6	49.8	47.1	58	0.99	0.8	1.61	0.8	0.1806	0	0	0.3607	1.06e-07	1	0	0	0	1.07	-0.0857	0	2.95	1.7613
Tb927.7.4890	POMP34	Mito.membrane	2			109	65.9	314	113.3	88.5	155.7	0.96	0.74	2.02	0.74	0.3103	0	0	-0.1173	0.0369	1	0	0	0	#N/A	0.0596	0	2.95	1.6736
Tb927.8.5130	POMP41	Mito.membrane	1			81.4	41.5	130.5	47.2	46.6	60.1	1.72	0.89	2.17	0.89	0.672	0	0	-0.1121	0.146	0	0	0	0	#N/A	-0.2636	0	2.95	1.8319
Tb927.10.3900	protein kinase, putative	Protein.kinase	1			136.7	97.2	368.5	70	48.9	98.1	1.95	1.99	3.76	1.95	1.3599	0	0	-0.4489	1.11e-17	1	0	0	0	#N/A	2.0005	0	2.95	1.7225
Tb927.3.3220	CTR9, part of PAF complex	RNA.synthesis	1			97.2	59.9	222.4	94.2	66.5	158.4	1.03	0.9	1.4	0.9	0.1506	0	0	-0.1616	0.0141	1	0	0	0	#N/A	-0.0638	0	2.95	1.6135
Tb927.10.11110	hypothetical protein, conserved	ZUnknown	1			25.3	28.6	161.6	39.2	54.2	105.1	0.65	0.53	1.54	0.53	-0.1414	0	0	0.1939	0.0002	1	0	0	0	#N/A	-0.1065	0	2.95	1.7312
Tb927.9.6670	hypothetical protein, conserved	ZUnknown	1			53.1	25.1	376.4	105.2	75.8	172.1	0.5	0.33	2.19	0.33	0.0096	0	0	-0.1696	0.00141	1	0	0	0	#N/A	-0.1746	0	2.95	1.8992
Tb927.6.220	purine nucleoside transporter NT9	Nucleotides	1	6301	1073	76	112.4	135.2	49.1	25.5	17.9	1.55	4.41	7.55	1.55	2.171	0	0	1.195	2.8e-30	1	0	1	0	1.36	1.6772	0	2.94	1.8359
Tb927.1.1890	RCCP Replication Factor C Subunit 1-related protein	DNA	1	4099	504	27.9	20.6	107.6	35.7	66.1	129.3	0.78	0.31	0.83	0.31	-0.6439	0	0	-0.6912	8.72e-34	1	0	0	1	1	-0.0718	0	2.94	1.6508
Tb927.4.1250	PEX1 peroxisome biogenesis factor 1	Glycosome	1	3131	340	59.8	31.6	114.2	103.9	86.3	110.5	0.58	0.37	1.03	0.37	-0.5995	0	0	-0.0724	0.247	0	0	0	0	1.15	0.1036	0	2.94	1.5656
Tb927.11.7810	hypothetical protein	ZUnknown	1	1432	284	154.4	93.5	242.2	144.8	58.5	47.2	1.07	1.6	5.13	1.07	1.3785	0	0	-0.4491	2.2e-07	1	0	0	0	0.51	0.5798	0	2.94	1.6229
Tb927.5.3160	protein kinase, putative	Protein.kinase	1			100	55.6	339.3	87.7	100.6	212.6	1.14	0.55	1.6	0.55	0.1331	0	0	-0.1681	0.000859	1	0	0	0	#N/A	-0.6849	1	2.94	1.7093
Tb927.4.4500	hypothetical protein, conserved	ZUnknown	1			56	63.1	361.7	70.4	72.6	140.6	0.8	0.87	2.57	0.8	0.4991	0	0	-0.2929	8.53e-07	1	0	0	0	#N/A	1.0207	0	2.94	1.696
Tb927.7.1090	SNF2 family N-terminal domain/Ring finger domain containing protein, putative	ZUnknown	1			74.6	59.4	668.3	120.2	89.2	165.6	0.62	0.67	4.04	0.62	0.8292	0	0	1.1617	9.04e-135	1	0	1	0	#N/A	2.0029	0	2.94	2.0286
Tb927.10.3340	protein kinase, putative	Protein.kinase	1.99	5385	2418	120	98	721.6	83.8	63.8	110.5	1.43	1.54	6.53	1.43	1.663	0	0	-0.1222	0.062	0	0	0	0	1.39	-0.9858	1	2.93	1.8758
Tb927.4.2510	multidrug resistance-associated protein, putative,p-glycoprotein (PGPA)	Transporter	1.31	4890	81	83.1	41.9	308.7	129.5	77.7	133.8	0.64	0.54	2.31	0.54	0.2183	0	0	-0.1526	0.00281	1	0	0	0	1.2	-0.2464	0	2.93	1.7698
Tb927.4.2820	hypothetical protein, conserved	ZUnknown	1	3500	50	19.4	8.1	86.9	19.8	33.6	82	0.98	0.24	1.06	0.24	-0.3959	0	0	-0.7572	9.31e-36	1	0	0	1	1.03	-0.2463	0	2.93	1.6554
Tb927.8.1690	serine/threonine-protein kinase, putative	Protein.kinase	1	2616	236	58.1	40.9	99.8	70.4	70.8	91.9	0.83	0.58	1.09	0.58	-0.263	0	0	0.1309	0.0624	0	0	0	0	1.13	-0.2185	0	2.93	1.7093
Tb927.9.9160	hypothetical protein, conserved	ZUnknown	1			58.3	27.6	96.9	67.9	40.7	53.3	0.86	0.68	1.82	0.68	0.1635	0	0	-0.577	1.72e-16	1	0	0	0	#N/A	-0.1193	0	2.93	1.8032
Tb927.8.2770	IP3 inositol trisphosphate receptor.	Signalling	1.12	10961	1469	79.1	30.5	1024	167.6	118.7	430.3	0.47	0.26	2.38	0.26	0.052	0	0	0.1799	3.18e-05	1	0	0	0	1.05	-0.2353	0	2.92	1.9069
Tb927.11.2860	hypothetical protein, conserved, WD40 repeats	ZUnknown	1	6642	4309	50.6	54.5	826.1	58.8	74.8	99.6	0.86	0.73	8.29	0.73	1.7195	0	0	-0.0815	0.199	0	0	0	0	0.89	0.7891	0	2.92	1.8797
Tb927.8.7780	hypothetical protein, conserved	ZUnknown	1.13	5358	397	152.1	148.4	517.4	142.5	95.8	211.2	1.07	1.55	2.45	1.07	0.757	0	0	-1.5314	5.54e-113	1	0	0	1	1.45	0.1098	0	2.92	1.6645
Tb927.11.14650	hypothetical protein, conserved	ZUnknown	1	3558	193	65.9	43.4	157.8	69.5	71.3	108.1	0.95	0.61	1.46	0.61	0.0096	0	0	0.0883	0.12	0	0	0	0	0.97	-0.1343	0	2.92	1.6736
Tb927.11.3130	glycosomal transporter (GAT2)	Glycosome	1	3167	1003	54.7	39.8	183.1	60.6	47.5	92.3	0.9	0.84	1.98	0.84	0.3103	0	0	-0.0744	0.218	0	0	0	0	1.09	-0.471	0	2.92	1.7181
Tb927.6.5020	CYC7, CYC2-like cyclin	Cell.cycle	1	2963	493	117.3	211.3	108.7	61.8	33	11.3	1.9	6.4	9.62	1.9	2.5785	0	0	1.1953	3.34e-24	1	0	1	0	1.17	0.2707	0	2.92	1.6554
Tb927.11.12180	kinesin, 4/10 family.	Cytoskeleton	1			38.2	29.5	283.3	32.4	23.5	46.6	1.18	1.26	6.08	1.18	1.5059	0	0	0.7314	1.35e-30	1	0	1	0	#N/A	1.18	0	2.92	1.7949
Tb927.3.2690	serine/threonine-protein kinase, putative,protein kinase, putative	Protein.kinase	1			35.3	20.2	272.8	54.2	74.9	155.1	0.65	0.27	1.76	0.27	-0.1627	0	0	-0.27	5.97e-07	1	0	0	0	#N/A	-0.4933	0	2.92	1.6462
Tb927.1.4010	TbPRI2, primase 2, kDNA replication	Mito.DNA	1	4335	102	68.8	63.7	571	62.9	71.6	104	1.09	0.89	5.49	0.89	1.3161	0	0	0.2473	5.06e-06	1	0	0	0	1.22	0.2507	0	2.91	1.7485
Tb927.11.11500	cyclin dependent kinase-binding protein, putative	Cell.cycle	1	3129	1039	60.3	62.4	192.3	61.6	60.9	105.1	0.98	1.02	1.83	0.98	0.3524	0	0	0.205	0.000822	1	0	0	0	1.08	-0.3761	0	2.91	1.669
Tb927.9.1730	Primase zinc finger/Mcm10 replication factor, putative	ZUnknown	1	2836	503	50.9	64.5	184.2	46.2	44	45.6	1.1	1.47	4.04	1.1	1.1397	0	0	0.1384	0.05	0	0	0	0	1.13	-0.1263	0	2.91	1.9373
Tb927.11.1340	Flagella connector protein 1, protein kinase-like domain, no yeast or human match	ZUnknown	1			41.8	20.2	193.2	43.5	26.5	64.8	0.96	0.76	2.98	0.76	0.6477	0	0	-0.7235	1.11e-35	1	0	0	1	#N/A	-1.0073	1	2.91	1.6645
Tb927.7.680	chaperone DNAj, putative, J25	Chaperone	1.33			81.9	55.4	166.8	77.5	70.5	103.5	1.06	0.79	1.61	0.79	0.2058	0	0	-0.1095	0.0872	0	0	0	0	#N/A	-0.3695	0	2.91	1.5993
Tb927.10.12480	UDP-xylose and UDP-N-acetyl glucosamine transporter family	Glycans	1			53	45.5	91.5	53.1	43.2	57.6	1	1.05	1.59	1	0.279	0	0	0.1989	0.0147	1	0	0	0	#N/A	-0.1588	0	2.91	1.7225
Tb927.5.3920	PEX6 peroxisome assembly protein, AAA ATPase	Glycosome	1			69	23.3	233.4	82.6	44.6	97.8	0.84	0.52	2.39	0.52	0.3219	0	0	0.041	0.571	0	0	0	0	#N/A	-0.1155	0	2.91	1.7949
Tb927.7.6780	hypothetical protein	ZUnknown	1		2154	44.3	56.4	76.2	23.5	27.2	26.7	1.89	2.07	2.85	1.89	1.1827	0	0	0.3154	0.138	0	0	0	0	1.02	0.2911	0	2.91	1.6871
Tb927.9.9610	hypothetical protein, conserved	ZUnknown	1			31.5	31.1	48.3	27.3	18.2	13.9	1.15	1.71	3.47	1.15	1.0772	0	0	0.0739	0.604	0	0	0	0	#N/A	0.0492	0	2.91	1.7866
Tb927.9.7030	hypothetical protein, conserved	ZUnknown	1.38			27.9	15.7	219.7	49.4	43.4	91.7	0.56	0.36	2.4	0.36	0.1462	0	0	0.161	0.00933	1	0	0	0	#N/A	-0.1987	0	2.91	1.84
Tb927.3.1330	hypothetical protein, conserved	ZUnknown	1	4503	176	42.3	30.6	201.5	59.1	59.4	82	0.72	0.52	2.46	0.52	0.3026	0	0	0.2214	0.000448	1	0	0	0	1.18	-0.2349	0	2.9	1.7824
Tb927.9.2140	protein kinase, putative	Protein.kinase	1	4231	941	85.2	154.3	524.2	64.4	74.8	124.6	1.32	2.06	4.21	1.32	1.3391	0	0	0.2292	8.18e-06	1	0	0	0	1.27	0.2535	0	2.9	1.696
Tb927.11.16530	hypothetical protein, conserved	Mito.pathway	1	3631	207	71.4	55.3	296.7	75.6	56	90.3	0.94	0.99	3.29	0.94	0.7991	0	0	-0.147	0.0144	1	0	0	0	1	-0.1519	0	2.9	1.7442
Tb927.9.11670	hypothetical protein, conserved	ZUnknown	1.11			32.7	21.3	156.1	44	38.5	82.9	0.74	0.55	1.88	0.55	0.0795	0	0	0.3552	2.41e-09	1	0	0	0	#N/A	-0.1086	0	2.9	1.7698
Tb927.10.1190	hypothetical protein, conserved	ZUnknown	1.18			60.6	32.7	141.7	52.7	44.6	71.2	1.15	0.73	1.99	0.73	0.3674	0	0	0.0684	0.345	0	0	0	0	#N/A	-0.174	0	2.9	1.844
Tb927.9.15400	CAP334 ankyrin-repeat protein, clathrin-associated	Vesicular.transport	1	9440	250	54.4	32	537.9	112.6	83.6	227.2	0.48	0.38	2.37	0.38	0.1066	0	0	0.0796	0.11	0	0	0	0	1.05	-0.1132	0	2.89	1.7398
Tb927.4.420	TOR2 protein kinase	Protein.kinase	1.14	7943	305	65.1	19.4	463	111.9	58.7	206.3	0.58	0.33	2.24	0.33	0.0704	0	0	-0.5566	8.25e-39	1	0	0	0	1.04	-0.2363	0	2.89	1.6462
Tb927.8.2490	SET domain containing protein, putative	ZUnknown	1	1167	165	24.1	16.7	63	22.6	21.7	33.7	1.07	0.77	1.87	0.77	0.3065	0	0	0.4559	3.32e-07	1	0	0	0	1.2	-0.1185	0	2.89	1.7049
Tb927.3.2760	hypothetical protein, conserved	ZUnknown	1			38.8	27	146.4	44.9	55	111.7	0.86	0.49	1.31	0.49	-0.1735	0	0	-0.1757	0.000936	1	0	0	0	#N/A	-0.0802	0	2.89	1.7093
Tb927.7.7130	TWY1 homologue, tRNA modification	Translation.tRNA	1	2895	86	128	74.9	132.8	248.7	180.5	169.6	0.51	0.41	0.78	0.41	-0.8194	0	0	-0.044	0.462	0	0	0	0	1.07	0.0181	0	2.88	1.6826
Tb927.11.7130	hypothetical protein, conserved	Cytoskeleton	1			20.2	10.5	88	32.1	25.5	54	0.63	0.41	1.63	0.41	-0.1681	0	0	0.038	0.617	0	0	0	0	#N/A	0.0537	0	2.88	1.7004
Tb927.11.3780	subtilisin peptidase	Protease	1			59.6	22.2	161.8	75.4	59	117.8	0.79	0.38	1.37	0.38	-0.2401	0	0	0.0429	0.461	0	0	0	0	#N/A	-0.1089	0	2.88	1.7181
Tb927.10.3790	hypothetical protein, conserved	ZUnknown	1.24			86.3	28.4	748.4	216.6	198.1	420.6	0.4	0.14	1.78	0.14	-0.3708	0	0	-0.3012	3.22e-14	1	0	0	0	#N/A	-0.1684	0	2.88	1.5801
Tb927.11.830	hypothetical protein, conserved, no yeast or human match	ZUnknown	1			99.3	81.1	386.5	60.5	101.2	153.7	1.64	0.8	2.51	0.8	0.7225	0	0	-0.2254	4.37e-05	1	0	0	0	#N/A	0.2991	0	2.88	1.6826
Tb927.5.710	hypothetical protein, conserved	ZUnknown	1			35.7	22.9	128.8	44.2	55.6	70.4	0.81	0.41	1.83	0.41	0.0238	0	0	0.0966	0.139	0	0	0	0	#N/A	-0.3793	0	2.88	1.7655
Tb927.8.5240	Domain of unknown function DUF221, putative	ZUnknown	1.37	4234	813	259.9	161.2	370.6	296.9	197.1	275.8	0.88	0.82	1.34	0.82	0.0191	0	0	-0.125	0.00712	1	0	0	0	1.91	0.5602	0	2.87	1.5898
Tb927.11.4150	hypothetical protein, conserved	ZUnknown	1	2191	250	19	7.7	73	25.3	16.2	32	0.75	0.48	2.28	0.48	0.2265	0	0	0.2144	0.00667	1	0	0	0	1.03	-0.3628	0	2.87	1.8115
Tb927.9.9320	MOK protein kinase	Protein.kinase	1			196	210.5	293.8	120.6	118.8	124.8	1.63	1.77	2.35	1.63	0.9386	0	0	-0.9983	5.03e-50	1	0	0	1	#N/A	-0.1169	0	2.87	1.5898
Tb927.3.1610	CLK kinase	Cell.cycle	1.68			120.4	212	518.5	95.4	113	131.3	1.26	1.88	3.95	1.26	1.2408	0	0	-0.0811	0.198	0	0	0	0	#N/A	0.8575	0	2.87	1.6826
Tb927.10.910	DNA repair and recombination helicase protein PIF6	Mito.DNA	1.13			33.7	18.5	85.7	32.4	44.1	85.1	1.04	0.42	1.01	0.42	-0.2805	0	0	-0.1089	0.151	0	0	0	0	#N/A	-0.1546	0	2.87	1.6736
Tb927.8.1830	MTU1 tRNA thiolation	rRNA.tRNA.process	1			22.6	14.5	86.9	33.3	30.8	55	0.68	0.47	1.58	0.47	-0.1361	0	0	0.1569	0.0182	1	0	0	0	#N/A	-0.1233	0	2.87	1.757
Tb927.11.14400	hypothetical protein, conserved	ZUnknown	1			61.9	27.2	57.1	39.4	24.1	34	1.57	1.13	1.68	1.13	0.546	0	0	0.1038	0.251	0	0	0	0	#N/A	-0.2303	0	2.87	1.6229
Tb927.6.2070	hypothetical protein, conserved	ZUnknown	1			17.5	11.3	38.1	16.8	12.6	15.8	1.04	0.9	2.41	0.9	0.5361	0	0	0.3176	0.00629	1	0	0	0	#N/A	-0.1403	0	2.87	1.7908
Tb927.10.3550	DNA repair helicase, putative	DNA	1.11	4426	377	90.4	57.1	314.2	72.5	63.2	100.9	1.25	0.9	3.11	0.9	0.8101	0	0	-0.0826	0.214	0	0	0	0	1.43	-0.2738	0	2.86	1.7824
Tb927.11.12920	hypothetical protein, conserved	ZUnknown	1			35.8	17.9	111.7	29.3	29.1	56.8	1.22	0.62	1.97	0.62	0.3448	0	0	-0.1368	0.104	0	0	0	0	#N/A	-0.2109	0	2.86	1.8953
Tb927.2.4000	hypothetical protein, conserved	ZUnknown	1	3000	205	35.7	14	103.8	39.7	36.4	72.7	0.9	0.38	1.43	0.38	-0.1467	0	0	-0.2955	3.28e-06	1	0	0	0	1.07	-0.1125	0	2.85	1.669
Tb927.10.15450	hypothetical protein, conserved	ZUnknown	1	1616	148	65.3	110.3	114.6	57.6	50.6	46.8	1.13	2.18	2.45	1.13	0.9411	0	0	0.0425	0.655	0	0	0	0	1.03	-0.3621	0	2.85	1.844
Tb927.8.710	DRBD17	RNA.binding	1		1239	282.3	309.9	987.5	229.3	275.2	599.1	1.23	1.13	1.65	1.13	0.4186	0	0	-0.863	8.29e-62	1	0	0	1	1.1	-0.1312	0	2.85	1.7355
Tb927.10.11470	hypothetical protein, conserved	ZUnknown	1.41			30	12.6	189.1	52.1	50.9	95.8	0.58	0.25	1.97	0.25	-0.0995	0	0	-0.0718	0.212	0	0	0	0	#N/A	-0.2471	0	2.85	1.852
Tb927.6.3560	hypothetical protein, conserved	ZUnknown	1	5403	911	120.3	61.8	235.4	126.2	98.8	166.1	0.95	0.63	1.42	0.63	0	0	0	-0.5626	2.89e-25	1	0	0	0	1.1	-0.1206	0	2.84	1.6915
Tb927.11.13550	hypothetical protein, conserved	ZUnknown	1	2540	574	58	27.7	114.8	52.3	42	77.6	1.11	0.66	1.48	0.66	0.1155	0	0	-0.1199	0.0782	0	0	0	0	1.13	-0.5984	1	2.84	1.5656
Tb927.3.1540	CAAX prenyl protease 2, putative,peptidase with unknown catalytic mechanism (family U48)	Protease	1	1855	242	38.3	35.3	53.5	24.6	18.1	17.3	1.56	1.95	3.09	1.56	1.1375	0	0	0.1807	0.126	0	0	0	0	1.13	0.019	0	2.84	1.6826
Tb927.2.1600	invariant surface glycoprotein, putative	ZUnknown	1	1793	821	79.4	40.6	52.9	67	48.6	51.3	1.19	0.84	1.03	0.84	0.0286	0	0	0.3472	1.16e-05	1	0	0	0	0.98	-0.4811	0	2.84	1.6135
Tb927.9.3460	ZC3H27	RNA.binding	1			31.5	23.8	77.2	35.4	48.9	65.2	0.89	0.49	1.18	0.49	-0.2288	0	0	-0.0014	0.987	0	0	0	0	#N/A	-0.2997	0	2.84	1.6415
Tb927.7.5630	hypothetical protein, conserved	ZUnknown	1.13			31.2	23.9	81.6	42.3	35.9	51.5	0.74	0.67	1.58	0.67	-0.0048	0	0	0.0961	0.247	0	0	0	0	#N/A	-0.066	0	2.84	1.6369
Tb927.9.4530	hypothetical protein, conserved	ZUnknown	1			55.1	30.1	202.9	65	60	103.2	0.85	0.5	1.97	0.5	0.1462	0	0	0.1326	0.0176	1	0	0	0	#N/A	-0.1674	0	2.84	1.696
Tb927.5.3540	Meckelin (Transmembrane protein 67), putative	ZUnknown	1			142.1	234.3	384	165.9	92.5	122	0.86	2.53	3.15	0.86	1.1243	0	0	-0.0248	0.712	0	0	0	0	#N/A	-0.0107	0	2.84	1.7698
Tb927.8.3020	hypothetical protein, conserved	ZUnknown	1	7216	5397	43.7	46.6	355.6	53	41.4	59.4	0.82	1.13	5.99	0.82	1.4042	0	0	0.3002	2.87e-07	1	0	0	0	1.01	1.2904	0	2.83	1.8237
Tb927.5.1180	hypothetical protein, conserved	ZUnknown	1	2746	118	51.6	50.7	107.8	72	95.4	75.3	0.72	0.53	1.43	0.53	-0.1627	0	0	0.0045	0.957	0	0	0	0	1.11	-0.1361	0	2.83	1.7093
Tb927.11.11740	membrane-bound acid phosphatase, putative	Phosphatase	1.86	2050	438	301	232.7	293.3	235	157.4	147.9	1.28	1.48	1.98	1.28	0.6599	0	0	0.2188	0.000526	1	0	0	0	1.1	-0.2216	0	2.83	1.6323
Tb927.10.590	hypothetical protein, conserved	Mito.pathway	1.97			33.3	20.5	133.8	37.1	32.7	64	0.9	0.63	2.09	0.63	0.271	0	0	0.063	0.431	0	0	0	0	#N/A	-0.4749	0	2.83	1.7049
Tb927.8.7550	hypothetical protein	ZUnknown	1			33.7	31.9	116.5	15.7	22.1	35.9	2.15	1.44	3.25	1.44	1.189	0	0	0.7482	4.63e-26	1	0	1	0	#N/A	1.0886	0	2.83	1.5801
Tb927.10.7900	hypothetical protein, conserved	ZUnknown	1.06			68.4	40.4	123.7	54.5	38.1	72.1	1.26	1.06	1.72	1.06	0.4294	0	0	0.1527	0.0398	1	0	0	0	#N/A	-0.1861	0	2.83	1.6736
Tb927.10.13660	Domain of unknown function DUF21, putative	ZUnknown	1	2908	603	81.1	30.5	88.7	90.4	74.4	93.1	0.9	0.41	0.95	0.41	-0.4086	0	0	0.1703	0.00503	1	0	0	0	1.1	-0.1565	0	2.82	1.5656
Tb927.4.1400	vacuolar transport protein 4A, putative	Lysosome	1	1835	330	60.1	57.8	69.3	44.4	35	33.3	1.35	1.65	2.08	1.35	0.7599	0	0	0.1454	0.138	0	0	0	0	0.93	-0.4649	0	2.82	1.6826
Tb927.11.7010	protein kinase, putative	Protein.kinase	1			119	140.2	644.5	89.5	67.4	113.3	1.33	2.08	5.69	1.33	1.6009	0	0	0.092	0.131	0	0	0	0	#N/A	0.3802	0	2.82	1.6599
Tb927.8.6880	IF2 translation initiation factor IF-2, putative	Translation	1			55	28.8	115.2	65	37.5	58	0.85	0.77	1.99	0.77	0.267	0	0	0.1433	0.0712	0	0	0	0	#N/A	-0.1208	0	2.82	1.6462
Tb927.4.3530	hypothetical protein, conserved	ZUnknown	1			65.7	34.8	190.6	48.8	48.9	82	1.35	0.71	2.32	0.71	0.546	0	0	0.2462	0.00013	1	0	0	0	#N/A	-0.1678	0	2.82	1.7398
Tb927.11.1580	hypothetical protein, conserved	ZUnknown	1	3677	200	50.4	80.6	255.8	43.8	37.2	46.6	1.15	2.17	5.49	1.15	1.5542	0	0	0.147	0.0357	1	0	0	0	0.98	-0.5649	0	2.81	1.8319
Tb927.3.1180	hypothetical protein, conserved	ZUnknown	1	3337	624	33.7	22.7	142.2	35.7	49	83.9	0.94	0.46	1.69	0.46	0.0426	0	0	0.141	0.0213	1	0	0	0	1.05	-0.2955	0	2.81	1.7268
Tb927.10.6210	TPR repeat, putative	ZUnknown	1	2884	848	140.7	196	391.9	79.4	58.8	72.9	1.77	3.33	5.38	1.77	1.8046	0	0	0.4757	1.14e-17	1	0	0	0	1.8	0.1589	0	2.81	1.7225
Tb927.8.8010	hypothetical protein, conserved	ZUnknown	1.26	2695	283	69.8	27.3	128.3	54.1	37.1	55.6	1.29	0.74	2.31	0.74	0.5327	0	0	-1.1926	3.57e-62	1	0	0	1	1.11	-0.1426	0	2.81	1.6826
Tb927.11.16930	ABC transporter of the mitochondrion, putative (ABCB7)	Transporter	1.09			32.6	17.2	86.8	43.3	32.3	53.3	0.75	0.53	1.63	0.53	-0.0439	0	0	0.2212	0.00155	1	0	0	0	#N/A	-0.135	0	2.81	1.6276
Tb927.11.2820	hypothetical protein, conserved	ZUnknown	1			50.4	48.5	857.3	74.7	61.5	117.1	0.67	0.79	7.32	0.67	1.5493	0	0	-0.1402	0.0156	1	0	0	0	#N/A	0.5554	0	2.81	1.5898
Tb927.4.1390	hypothetical protein, conserved	ZUnknown	1	3967	1030	145.9	91.8	340.3	178.8	110.8	126.4	0.82	0.83	2.69	0.82	0.5327	0	0	1.0921	8.66e-120	1	0	1	0	1.6	0.4922	0	2.8	1.8197
Tb927.10.14450	hypothetical protein, conserved	ZUnknown	1	1843	654	48.3	90.9	144.9	42.7	21.6	19.6	1.13	4.21	7.39	1.13	2.0852	0	0	0.4393	4.64e-07	1	0	0	0	0.99	0.092	0	2.8	1.7093
Tb927.9.6270	hypothetical protein, conserved	ZUnknown	1	1824	235	62.6	36.3	82.1	49.6	38.7	45.3	1.26	0.94	1.81	0.94	0.4186	0	0	0.4534	3.23e-11	1	0	0	0	1.11	-0.0911	0	2.8	1.5558
Tb927.11.12270	hypothetical protein, conserved,drug resistence protein, putative	Membrane.protein	1	1786	42	32.7	62	156.1	24	36.4	40.7	1.36	1.7	3.84	1.36	1.2016	0	0	-0.0183	0.856	0	0	0	0	0.87	-0.0125	0	2.8	1.6781
Tb927.8.5690	KREPB8	Mito.RNA	1			17	10.8	50.5	15.9	15.6	25.7	1.07	0.69	1.96	0.69	0.3103	0	0	0.176	0.0545	0	0	0	0	#N/A	-0.1017	0	2.8	1.8237
Tb927.1.4780	Alpha/beta hydrolase domain-containing protein	Protease	1			61.7	46.7	109.8	59.7	55.1	74.8	1.03	0.85	1.47	0.85	0.1592	0	0	0.1746	0.00805	1	0	0	0	#N/A	-0.123	0	2.8	1.5801
Tb927.10.1380	NEK19 protein kinase	Protein.kinase	1.21			53.2	39.1	169.7	63.5	62	97.6	0.84	0.63	1.74	0.63	0.0976	0	0	-0.0453	0.507	0	0	0	0	#N/A	-0.3568	0	2.8	1.7312
Tb927.10.8680	hypothetical protein, conserved	ZUnknown	1			28.6	20.3	108.2	21.7	12.3	24.9	1.32	1.65	4.35	1.32	1.2869	0	0	0.3794	7.06e-07	1	0	0	0	#N/A	1.1011	0	2.8	1.7137
Tb927.7.3160	dynein heavy chain, cytosolic, Dynein DYNC1HI Cyto1 clathrin-associated	Vesicular.transport	1.07	16306	383	76.5	33.5	800.7	188.2	165.9	579.7	0.41	0.2	1.38	0.2	-0.5922	0	0	-0.0806	0.0676	0	0	0	0	0.96	-0.248	0	2.79	1.669
Tb927.11.8940	LDK protein kinase	Protein.kinase	1	2933	993	33	24	100.4	54	30.3	43.5	0.61	0.79	2.31	0.61	0.3065	0	0	0.1745	0.0308	1	0	0	0	1.06	-0.3323	0	2.79	1.7137
Tb927.1.2110	calpain-like cysteine peptidase, putative,cysteine peptidase, Clan CA, family C2, putative	Protease	1	2840	508	51.7	40.7	146.3	41	29.6	40.9	1.26	1.38	3.58	1.26	1.052	0	0	0.5979	5.41e-14	1	0	1	0	1.11	0.1222	0	2.79	1.7004
Tb927.10.10330	Anaphase-promoting complex CDC27	Cell.cycle	1.08	1797	119	90.8	52.3	131.8	109.5	86.8	107	0.83	0.6	1.23	0.6	-0.1735	0	0	0.0288	0.736	0	0	0	0	1.26	-0.1107	0	2.79	1.6369
Tb927.10.6860	endonuclease V, cleaves RNA at inosines	RNA.degradation	1	1440	334	38.3	32.5	82.7	26.2	33.4	33.3	1.46	0.97	2.48	0.97	0.7108	0	0	0.1351	0.101	0	0	0	0	1.02	-0.124	0	2.79	1.7442
Tb927.10.8730	ABC1 family, putative	Mito.pathway	1			71.9	79.2	282.5	72.9	37.6	45.5	0.99	2.11	6.21	0.99	1.6338	0	0	0.9284	1.87e-58	1	0	1	0	#N/A	0.8378	0	2.79	1.6915
Tb927.4.4890	CorA-like Mg2+ transporter protein, putative	ZUnknown	1			35.6	42.4	66.7	19.7	13.3	18.9	1.81	3.19	3.53	1.81	1.5076	0	0	-0.1843	0.0957	0	0	0	0	#N/A	-0.3403	0	2.79	1.6229
Tb927.10.14400	hypothetical protein, conserved	ZUnknown	1.18			85.6	40.4	165.9	106.3	89.2	143.7	0.81	0.45	1.15	0.45	-0.3159	0	0	0.2751	1.36e-07	1	0	0	0	#N/A	-0.3804	0	2.79	1.6276
Tb927.3.2810	hypothetical protein, conserved	ZUnknown	1			66.8	51.8	274.3	85	65.4	97.7	0.79	0.79	2.81	0.79	0.5493	0	0	-0.3978	1.95e-14	1	0	0	0	#N/A	-0.2452	0	2.79	1.7782
Tb927.6.4470	prozyme,S-adenosylmethionine decarboxylaseregulator	Redox	1			114.2	146.6	438	122.5	94.1	124	0.93	1.56	3.53	0.93	1.0048	0	0	-0.4724	1.29e-14	1	0	0	0	#N/A	2.5014	0	2.78	1.5311
Tb927.10.5850	hypothetical protein, conserved, some similarity ot vauolar sorting proteins.	Vesicular.transport	1			78	39.5	1084	163.6	100.5	359.2	0.48	0.39	3.02	0.39	0.3748	0	0	-0.1633	8.5e-05	1	0	0	0	#N/A	-0.0663	0	2.78	1.516
Tb927.3.2800	hypothetical protein	ZUnknown	1.89			87	85.3	149	63.7	65.7	66.9	1.37	1.3	2.23	1.3	0.7078	0	0	-0.1373	0.0407	1	0	0	0	#N/A	-0.1816	0	2.78	1.6369
Tb927.11.14500	Protein kinase domain containing protein, putative	ZUnknown	1			43	21.1	94	27.7	11.4	31.9	1.55	1.85	2.95	1.55	1.0818	0	0	0.3955	5.84e-06	1	0	0	0	#N/A	-0.1566	0	2.78	1.6415
Tb927.7.6790	hypothetical protein, conserved	ZUnknown	1			44.8	58.2	174.7	31.7	40.9	51.4	1.41	1.42	3.4	1.41	1.0543	0	0	0.4574	1.31e-10	1	0	0	0	#N/A	0.2716	0	2.78	1.6736
Tb927.5.1890	hypothetical protein, conserved	ZUnknown	1	4625	1247	58.1	34.2	246.8	75.8	63.5	118.8	0.77	0.54	2.08	0.54	0.1763	0	0	-0.345	1.55e-09	1	0	0	0	1.1	-0.5568	0	2.77	1.6415
Tb927.10.1270	mismatch repair protein MSH4	DNA	1.21	3800	193	57.1	33.1	177.9	67	42.1	84.7	0.85	0.79	2.1	0.79	0.3181	0	0	-0.1563	0.00651	1	0	0	0	1.05	-0.2113	0	2.77	1.6554
Tb927.8.3960	hypothetical protein, conserved	ZUnknown	1	2199	967	11.9	6.9	65.2	16.2	18	42.9	0.73	0.38	1.52	0.38	-0.1899	0	0	0.3532	5.85e-06	1	0	0	0	1.09	-0.3117	0	2.77	1.7137
Tb927.8.560	GEM1, putative	ZUnknown	1	2080	302	149.9	63.1	148.9	145.7	77	94.2	1.03	0.82	1.58	0.82	0.1932	0	0	-0.6199	2.01e-18	1	0	0	1	1.2	-0.0767	0	2.76	1.5656
Tb927.8.6320	hypothetical protein, conserved	ZUnknown	1	1733	304	21.3	7.7	50.5	24.3	17.3	35.4	0.88	0.45	1.43	0.45	-0.1203	0	0	0.2049	0.00842	1	0	0	0	1.09	-0.1842	0	2.76	1.7004
Tb927.10.8610	hypothetical protein, conserved	Mito.pathway	1			73.1	30.9	187.5	98.7	71.4	125.2	0.74	0.43	1.5	0.43	-0.1681	0	0	0.0695	0.27	0	0	0	0	#N/A	-0.0178	0	2.76	1.84
Tb927.4.1450	hypothetical protein, conserved	ZUnknown	1			43	23.9	65	35.2	40.4	48.4	1.22	0.59	1.34	0.59	0.0704	0	0	0.3199	1.28e-05	1	0	0	0	#N/A	-0.1498	0	2.76	1.5509
Tb927.10.6180	hypothetical protein, conserved	ZUnknown	1			157.7	85.3	131.7	119.4	76.3	95.3	1.32	1.12	1.38	1.12	0.3486	0	0	0.1576	0.0166	1	0	0	0	#N/A	-0.3674	0	2.76	1.6041
Tb927.11.5160	hypothetical protein, conserved	ZUnknown	1			61.2	41.5	182.1	75.9	69.7	99.4	0.81	0.6	1.83	0.6	0.111	0	0	-0.1007	0.105	0	0	0	0	#N/A	-0.101	0	2.76	1.7093
Tb927.10.15300	protein kinase, putative	Protein.kinase	1.42	7438	3249	93.3	56.7	217	131.3	139.4	217.1	0.71	0.41	1	0.41	-0.5009	0	0	-0.5365	4.09e-32	1	0	0	0	0.86	-0.049	0	2.75	1.5211
Tb927.7.5220	Forkhead Kinase	Protein.kinase	1	5622	492	72.3	46.8	446.2	102.4	111.5	207.9	0.71	0.42	2.15	0.42	0.1287	0	0	0.0976	0.0545	0	0	0	0	1.08	-0.3621	0	2.75	1.7049
Tb927.2.3390	hypothetical protein, conserved	ZUnknown	1	3627	1167	112.3	101.3	289	142.5	70	98.2	0.79	1.45	2.94	0.79	0.788	0	0	-0.2938	1.76e-06	1	0	0	0	0.86	0.3151	0	2.75	1.6323
Tb927.8.8160	hypothetical protein, conserved	ZUnknown	1.13	3334	803	44	37.7	193.8	34	50.8	88.8	1.29	0.74	2.18	0.74	0.4889	0	0	-0.9695	2.83e-51	1	0	0	1	1.16	0.0124	0	2.75	1.5993
Tb927.10.11420	hypothetical protein, conserved	ZUnknown	1	2769	567	38.1	26.1	366.1	41.9	34.9	93.5	0.91	0.75	3.92	0.75	0.8953	0	0	-0.0303	0.681	0	0	0	0	1.15	-0.0586	0	2.75	1.9298
Tb927.8.7730	Sphingosine N-acyltransferase, putative	Lipids	1	2133	861	147	100.2	113.1	126	46.3	53.3	1.17	2.16	2.12	1.17	0.8613	0	0	0.6236	7.12e-12	1	0	1	0	1.09	0.0217	0	2.75	1.6276
Tb927.11.5240	Methyltransferase TRM13, putative	ZUnknown	1	1967	380	39.1	28.6	78	45.6	28.3	31.1	0.86	1.01	2.51	0.86	0.546	0	0	-0.0108	0.919	0	0	0	0	1.14	-0.0487	0	2.75	1.6508
Tb927.7.3230	hypothetical protein, conserved	ZUnknown	1			36.4	27.6	125.3	53.5	72.4	85.1	0.68	0.38	1.47	0.38	-0.2458	0	0	0.4139	7.06e-13	1	0	0	0	#N/A	-0.3331	0	2.75	1.7268
Tb927.11.4560	hypothetical protein, conserved	ZUnknown	1			73	43.9	128.3	54.1	44.9	39.8	1.35	0.98	3.22	0.98	0.8875	0	0	0.2164	0.00469	1	0	0	0	#N/A	-0.084	0	2.75	1.9336
Tb927.2.3750	Domain of unknown function (DUF4520), putative	ZUnknown	1	2740	356	42.5	22.8	106.8	49.3	35.2	51.9	0.86	0.65	2.06	0.65	0.251	0	0	-0.3021	2.51e-05	1	0	0	0	0.99	-0.3688	0	2.74	1.7049
Tb927.1.2820	pteridine transporter, putative	Transporter	2.66	2567	582	235	411.4	1409.7	324.6	182.3	193.3	0.72	2.26	7.29	0.72	1.7754	0	0	0.916	5.35e-53	1	0	1	0	1.13	-0.3474	0	2.74	1.6915
Tb927.7.3110	transporter protein, putative	Transporter	1	2470	509	40.1	26.3	92.9	51.9	46.6	54	0.77	0.56	1.72	0.56	0.0238	0	0	0.0239	0.803	0	0	0	0	1.14	-0.5647	0	2.74	1.6415
Tb927.8.1620	MSP-B, putative	Membrane.protein	5.25	1870	195	688.4	739.9	865.8	379.2	396.6	355.4	1.82	1.87	2.44	1.82	1.0309	0	0	0.5149	1.48e-28	1	0	0	0	1.03	-0.0081	0	2.74	1.6088
Tb927.11.9250	hypothetical protein, conserved	ZUnknown	1			286.4	225.6	264.1	206.6	138.8	159.9	1.39	1.63	1.65	1.39	0.6385	0	0	0.6109	2.8e-34	1	0	1	0	#N/A	0.1052	0	2.74	1.5261
Tb927.11.2340	hypothetical protein, conserved	ZUnknown	1	5537	3909	178.9	79	236.6	109.4	64.6	80.4	1.64	1.22	2.94	1.22	0.9511	0	0	0.224	0.000117	1	0	0	0	1.11	-0.1289	0	2.73	1.6088
Tb927.7.7190	hypothetical protein, conserved, trypanosome-specific	ZUnknown	1	5042	871	52.7	32.5	191.6	44.6	56.3	133.4	1.18	0.58	1.44	0.58	0.0931	0	0	-0.0587	0.354	0	0	0	0	1.1	-0.056	0	2.73	1.4699
Tb927.8.2380	ABC transporter, putative	Transporter	1	4117	564	206	103.2	258.5	328.1	351.7	382.9	0.63	0.29	0.68	0.29	-0.9069	0	0	0.3843	2.8e-16	1	0	0	0	1.12	-0.3646	0	2.73	1.6462
Tb927.4.2900	hypothetical protein, conserved	ZUnknown	1	3139	301	20.6	13.7	77.8	29.3	32.7	59.7	0.7	0.42	1.3	0.42	-0.31	0	0	-0.5208	1.1e-15	1	0	0	0	1.19	-0.1907	0	2.73	1.5945
Tb927.10.3430	hypothetical protein, conserved	ZUnknown	1	2493	502	141.2	92.4	195.1	128.1	54.9	60.3	1.1	1.68	3.24	1.1	1.0048	0	0	0.0562	0.477	0	0	0	0	1.11	-0.2714	0	2.73	1.7442
Tb927.6.4660	cationic amino acid transporter, putative	Amino.acid.transport	1	2307	604	86.1	65.9	112.2	60.7	33.3	40.1	1.42	1.98	2.8	1.42	1.0473	0	0	0.2068	0.0107	1	0	0	0	1.08	-0.3277	0	2.73	1.8074
Tb927.11.1280	hypothetical protein, conserved, no clear yeast or human matches	ZUnknown	1	1574	221	154.4	298.8	306.4	85.4	65.5	26.7	1.81	4.56	11.48	1.81	2.5729	0	0	-0.8141	2.46e-24	1	0	0	1	0.91	-0.0809	0	2.73	1.6182
Tb927.8.3420	hypothetical protein, conserved	ZUnknown	1	811	154	51.6	207.5	152.7	69.2	35.5	29	0.75	5.85	5.27	0.75	1.9843	0	0	-1.9113	1.19e-66	1	0	0	1	0.73	-0.1679	0	2.73	1.5361
Tb927.1.1130	glycerol-3-phosphate dehydrogenase (FAD-dependent), in TAO complex	Glucose.glycerol	2.13			40.8	28.4	169.7	47.8	44.7	59.2	0.85	0.64	2.87	0.64	0.5394	0	0	0.1493	0.0401	1	0	0	0	#N/A	-0.1902	0	2.73	1.9672
Tb927.10.5600	hypothetical protein, conserved	ZUnknown	1			71	49.5	94.8	55	34.1	46.2	1.29	1.45	2.05	1.29	0.6751	0	0	-0.2317	0.00632	1	0	0	0	#N/A	-0.3482	0	2.73	1.5059
Tb927.9.4570	hypothetical protein, conserved	ZUnknown	1			32.1	37.5	54.9	28.2	20.3	20	1.14	1.85	2.75	1.14	0.9361	0	0	0.3944	2.35e-05	1	0	0	0	#N/A	-0.4079	0	2.73	1.5509
Tb927.9.12950	hypothetical protein, conserved	ZUnknown	1			29.6	27.8	50.4	36.8	35.9	30.7	0.8	0.77	1.64	0.77	0.0976	0	0	0.2219	0.0125	1	0	0	0	#N/A	-0.3005	0	2.73	1.5801
Tb927.11.990	autophagy protein APG9, putative	ZUnknown	1			66.6	26.3	98	72.1	38.6	64.3	0.92	0.68	1.52	0.68	0.0566	0	0	0.3048	3.96e-06	1	0	0	0	#N/A	-0.3256	0	2.73	1.7866
Tb927.10.15310	hypothetical protein, conserved, linked to melarsoprol resistance, no yeast/human by NCBI	ZUnknown	1	8557	5487	33.8	30.4	332.9	39.4	29.5	67.8	0.86	1.03	4.91	0.86	1.1806	0	0	-0.2359	3.77e-05	1	0	0	0	1.18	-1.246	1	2.72	1.6554
Tb927.7.5280	hypothetical protein, conserved	Mito.pathway	1	7275	619	57.5	42.4	493.7	98.3	105.9	193.7	0.58	0.4	2.55	0.4	0.2347	0	0	0.0855	0.0908	0	0	0	0	1.1	-0.2155	0	2.72	1.7004
Tb927.7.980	hypothetical protein, conserved	ZUnknown	1	3894	947	67.7	71.6	292.3	60.5	41.7	64.1	1.12	1.72	4.56	1.12	1.3026	0	0	0.0568	0.442	0	0	0	0	1.42	0.0206	0	2.72	1.8074
Tb927.9.10340	Polyamine transporter 1 (TbPOT1)	Amino.acid.transport	1			40.8	24.8	86.5	41.8	26.4	38.4	0.98	0.94	2.25	0.94	0.4751	0	0	0.3432	2.23e-05	1	0	0	0	#N/A	-0.1715	0	2.72	1.585
Tb927.10.4300	Trk system potassium uptake protein (HKT1)	Ions	1.66			68.3	33.2	104	82.9	35.1	51.2	0.82	0.95	2.03	0.82	0.341	0	0	0.0905	0.261	0	0	0	0	#N/A	-0.3689	0	2.72	1.6736
Tb927.10.6150	neurobeachin/beige protein, putative	Lysosome	1.8			119.2	56.2	779.4	212.8	163.2	378.3	0.56	0.34	2.06	0.34	-0.0194	0	0	-0.1556	0.000162	1	0	0	0	#N/A	-0.1566	0	2.72	1.5945
Tb927.10.4650	hypothetical protein, conserved	ZUnknown	1			39.9	29	120.2	42	48.7	63.6	0.95	0.6	1.89	0.6	0.1974	0	0	0.0541	0.448	0	0	0	0	#N/A	-0.151	0	2.72	1.6041
Tb927.8.590	carnitine O-palmitoyltransferase, putative	Lipids	1	3369	725	69.3	45.6	142.8	54.4	42.2	74.1	1.27	1.08	1.93	1.08	0.5126	0	0	-0.6602	2.93e-19	1	0	0	1	1.14	-0.3993	0	2.71	1.541
Tb927.2.4020	TbNedd8-activating enzyme (TbAPPBP1)	Ubiquitin.proteasome	1	2265	263	51.5	35.3	128.2	61.8	57.5	90.5	0.83	0.61	1.42	0.61	-0.0689	0	0	0.0199	0.803	0	0	0	0	1.02	-0.2075	0	2.71	1.541
Tb927.4.2230	dolichyl-P-Man:GDP-Man1GlcNAc2-PP-dolichyl alpha-1,3-mannosyltransferase, putative	Glycans	1	1705	155	80.4	66.8	182.1	74.9	69.7	84.6	1.07	0.96	2.15	0.96	0.4785	0	0	0.0835	0.241	0	0	0	0	0.94	-0.1497	0	2.71	1.7049
Tb927.8.5190	hypothetical protein, conserved	ZUnknown	1	1531	616	36.9	61.9	102	18.7	14.6	15.6	1.97	4.24	6.54	1.97	2.0875	0	0	0.2463	0.0251	1	0	0	0	1.15	0.8391	0	2.71	1.6599
Tb927.4.340	hypothetical protein, conserved	ZUnknown	1			15.7	6.1	39	16.7	9	19	0.94	0.68	2.05	0.68	0.2908	0	0	-0.2416	0.0373	1	0	0	0	#N/A	-0.0884	0	2.71	1.6041
Tb927.4.1530	hypothetical protein, conserved	ZUnknown	1			59.7	34.3	209.8	62.6	60.8	118.2	0.95	0.56	1.77	0.56	0.1287	0	0	0.1606	0.00445	1	0	0	0	#N/A	-0.1886	0	2.71	1.6462
Tb927.10.13170	hypothetical protein, conserved	ZUnknown	1.82			16	11.8	57.8	11.3	23.7	27.2	1.42	0.5	2.13	0.5	0.433	0	0	-0.0515	0.613	0	0	0	0	#N/A	-0.3028	0	2.71	1.7613
Tb927.2.4510	CRK9 cdc2- like protein kinase	RNA.processing	1	4660	2141	82.2	55.5	187.8	82.5	97.3	158.4	1	0.57	1.19	0.57	-0.1203	0	0	0.2234	6.88e-05	1	0	0	0	1.06	-0.3321	0	2.7	1.5311
Tb927.11.10940	hypothetical protein, conserved, no domains	ZUnknown	1	3381	2298	57.6	74.1	187.4	29	40.9	53.2	1.99	1.81	3.52	1.81	1.2869	0	0	-0.0683	0.348	0	0	0	0	1.07	1.1404	0	2.7	1.4751
Tb927.9.13570	hypothetical protein, conserved	ZUnknown	1	3016	294	58.2	58.9	154.1	48.6	34.2	32.2	1.2	1.72	4.79	1.2	1.3618	0	0	0.0096	0.929	0	0	0	0	0.94	-0.4305	0	2.7	1.774
Tb927.6.3850	chaperone DNAj, putative, J9	Chaperone	1	1872	952	98.3	201.1	66.3	61.2	42.3	19.7	1.61	4.75	3.37	1.61	1.6975	0	0	-0.0283	0.859	0	0	0	0	1.32	-0.1605	0	2.7	1.4803
Tb927.10.16140	Adenylate/guanylate cyclase, putative	Signalling	1.01	1182	289	86.5	156.7	225.7	43.7	49.2	52.6	1.98	3.18	4.29	1.98	1.6554	0	0	0.2853	0.000323	1	0	0	0	1.3	-0.1153	0	2.7	1.5753
Tb927.11.3470	endosomal integral membrane protein, putative	Vesicular.transport	1			134.1	63.6	117.6	107.3	70.6	94.5	1.25	0.9	1.24	0.9	0.1763	0	0	-0.0426	0.603	0	0	0	0	#N/A	-0.3018	0	2.7	1.5558
Tb927.2.5540	hypothetical protein, conserved	ZUnknown	1.97			49.5	41.8	839.9	71.5	84.1	218.1	0.69	0.5	3.85	0.5	0.7485	0	0	0.2531	7.05e-09	1	0	0	0	#N/A	-0.0435	0	2.7	1.7485
Tb927.8.2060	Concanavalin A-like lectin/glucanases superfamily/Beige/BEACH domain containing protein, putative	ZUnknown	1	9177	30	124.3	49.8	1233.3	258	165.7	487.3	0.48	0.3	2.53	0.3	0.1419	0	0	0.0818	0.0702	0	0	0	0	0.83	-0.2066	0	2.69	1.7655
Tb927.2.5530	POMP22	Mito.membrane	2.01	5767	1130	70	40	623.9	80.1	85	215.7	0.87	0.47	2.89	0.47	0.4957	0	0	0.1421	0.00958	1	0	0	0	1.07	-0.452	0	2.69	1.696
Tb927.11.14910	protein phosphatase 2C, putative	Protein.phosphatase	1	2938	1616	79.5	64.7	110.2	122.2	65.5	76.4	0.65	0.99	1.44	0.65	0.038	0	0	0.0266	0.747	0	0	0	0	1.02	0.8798	0	2.69	1.4803
Tb927.11.16300	hypothetical protein, conserved	ZUnknown	1	1319	220	31.7	94.1	161	27.5	30.3	31.9	1.15	3.11	5.05	1.15	1.6338	0	0	0.3317	0.000246	1	0	0	0	1.08	-0.3843	0	2.69	1.7355
Tb927.2.2240	tRNA exportin, putative,exportin-T, putative (25N14.145)	Nuclear.transport	1			104.9	69.7	213.1	122.6	96.5	147.5	0.86	0.72	1.44	0.72	0.0096	0	0	-0.1075	0.0501	0	0	0	0	#N/A	-0.3669	0	2.69	1.5801
Tb927.4.1000	hypothetical protein, conserved	ZUnknown	1	4231	3312	62.8	305.5	520	52.8	55.8	48	1.19	5.47	10.83	1.19	2.5435	0	0	0.521	5.86e-12	1	0	0	0	1.44	2.3754	0	2.68	1.5607
Tb927.4.4940	hypothetical protein, conserved, poly(Q), no clear yeast or human matches	ZUnknown	1	4052	1948	19.2	27.9	66.1	16.8	15.6	16	1.14	1.79	4.13	1.14	1.2347	0	0	1.6612	1.37e-88	1	0	1	0	1.84	0.5478	0	2.68	1.516
Tb927.9.8540	VCL1 Voltage-gated Chloride channel Like	Vesicular.transport	1	3253	415	64.6	30.9	136.1	78.7	71.8	88.8	0.82	0.43	1.53	0.43	-0.1099	0	0	0.1889	0.00397	1	0	0	0	0.93	-0.3247	0	2.68	1.6182
Tb927.1.4370	Putative integral membrane protein conserved region (DUF2404), putative	ZUnknown	1	2839	632	134.7	164	158.9	126.1	103	112.7	1.07	1.59	1.41	1.07	0.4401	0	0	-0.0546	0.439	0	0	0	0	1.35	0.0768	0	2.68	1.5898
Tb927.11.6570	transporter, putative. 14 TM domains, SSF103473 general substrate transporter family	Transporter	1	2604	534	358.1	487.4	776.4	374.2	327.7	310.5	0.96	1.49	2.5	0.96	0.7225	0	0	0.6983	8.34e-57	1	0	1	0	1.01	-0.1437	0	2.68	1.4803
Tb927.9.1510	D-ala D-ala ligase C-terminus/SET domain containing protein, putative	ZUnknown	1	1905	339	60.1	37	57.2	70.6	50.4	56.5	0.85	0.73	1.01	0.73	-0.212	0	0	0.0993	0.201	0	0	0	0	0.97	-0.0707	0	2.68	1.4594
Tb927.10.2960	Translation factor GUF1, mitochondrial	Mitochondrial translation	1			60.6	47.7	128.5	78.9	101.1	97.3	0.77	0.47	1.32	0.47	-0.2288	0	0	0.1243	0.0627	0	0	0	0	#N/A	-0.1993	0	2.68	1.7485
Tb927.11.9150	hypothetical protein, conserved	Mito.DNA	1	5537	219	48.3	21.8	205.3	87.5	96.9	174.2	0.55	0.22	1.18	0.22	-0.6215	0	0	-0.3203	3.87e-11	1	0	0	0	1.28	-0.0965	0	2.67	1.6554
Tb927.7.2150	hypothetical protein, conserved	ZUnknown	2.54	4970	541	80.2	119.2	375.7	60.4	50.9	130	1.33	2.34	2.89	1.33	1.1287	0	0	-0.4213	1.49e-18	1	0	0	0	1.15	-0.1502	0	2.67	1.585
Tb927.7.4410	hypothetical protein, conserved	ZUnknown	1	3386	2022	41.7	64.8	172.2	22.1	30.2	36.4	1.89	2.15	4.73	1.89	1.5476	0	0	0.2522	0.00118	1	0	0	0	1.25	-0.6517	1	2.67	1.4957
Tb927.7.6720	hypothetical protein, conserved	ZUnknown	1	1640	98	63.7	90.3	177.9	53	47.6	37.4	1.2	1.9	4.76	1.2	1.3896	0	0	0.1586	0.0688	0	0	0	0	1.01	1.0664	0	2.67	1.5705
Tb927.9.13020	Microtubule-associated protein Bicaudal-D, putative	ZUnknown	1			26.4	21.3	31.6	27.2	29.1	25.8	0.97	0.73	1.22	0.73	-0.039	0	0	0.0552	0.625	0	0	0	0	#N/A	0.1646	0	2.67	1.5211
Tb927.8.1300	hypothetical protein, conserved	ZUnknown	1	3122	157	32.6	46.7	201.1	18.9	40.7	74.1	1.72	1.15	2.71	1.15	0.8953	0	0	-0.0715	0.301	0	0	0	0	0.94	0.1907	0	2.66	1.546
Tb927.2.2380	glycosyltransferase (GlcNAc), putative	Glycans	1	3081	345	74.9	61.8	129.9	70.1	83.5	96.3	1.07	0.74	1.35	0.74	0.075	0	0	-0.3572	4.61e-08	1	0	0	0	1.12	-0.2795	0	2.66	1.5898
Tb927.11.860	leucine-rich repeat protein (LRRP)	LRRP	1	3034	47	45.5	28.6	139	36.1	40.6	90	1.26	0.7	1.54	0.7	0.2224	0	0	0.0337	0.612	0	0	0	0	1.11	-0.1988	0	2.66	1.5509
Tb927.8.3570	Zinc finger, C3HC4 type (RING finger), putative	Zinc.finger	1	2171	1357	83	88.4	187.5	43	22.9	25.9	1.93	3.86	7.24	1.93	2.1188	0	0	0.3735	2.49e-07	1	0	0	0	1.06	-0.6529	1	2.66	1.5059
Tb927.11.2710	cell division cycle 45 (CDC45), putative	Cell.cycle	1.5			57.3	51.8	143.2	44.4	40.8	48	1.29	1.27	2.98	1.27	0.8849	0	0	-0.0784	0.286	0	0	0	0	#N/A	-0.4362	0	2.66	1.6781
Tb927.1.1350	kinesin heavy chain, Kinesin-1	Cytoskeleton	1.07	4436	1430	40.1	26.6	134	40.4	33.4	70.6	0.99	0.8	1.9	0.8	0.2987	0	0	0.3091	7.41e-09	1	0	0	0	1.25	-0.1033	0	2.65	1.4542
Tb927.9.5330	Putative papain-like cysteine peptidase (DUF1796), putative	ZUnknown	1	1479	95	47.9	40.1	93.2	49.4	45.2	50.3	0.97	0.89	1.85	0.89	0.3065	0	0	0.0742	0.348	0	0	0	0	1.24	-0.1594	0	2.65	1.7137
Tb927.11.7370	haloacid dehalogenase hydrolase, putative	Enzyme	1			109.1	140.8	184.9	55.5	55	51.3	1.97	2.56	3.6	1.97	1.4383	0	0	0.2299	0.00222	1	0	0	0	#N/A	0.5339	0	2.65	1.5509
Tb927.11.6690	protein kinase, putative	Protein.kinase	1			16.3	11.4	67.2	17.8	30	40.9	0.92	0.38	1.64	0.38	-0.0291	0	0	0.1461	0.105	0	0	0	0	#N/A	-0.2906	0	2.65	1.7355
Tb927.10.3870	hypothetical protein, tryp-specific, WD40 repeat and alcohol dehydrogenase-like domain	ZUnknown	1			75.9	31.7	575.8	78.5	81.2	232.5	0.97	0.39	2.48	0.39	0.3561	0	0	-0.2886	3.99e-11	1	0	0	0	#N/A	-0.3522	0	2.65	1.4957
Tb927.8.5750	hypothetical protein, conserved	ZUnknown	1.11	3236	581	59.2	47.2	189.3	53.1	60.3	89.3	1.11	0.78	2.12	0.78	0.4186	0	0	0.3115	1.34e-08	1	0	0	0	1.14	-0.1855	0	2.64	1.6323
Tb927.4.1980	hypothetical protein, conserved	ZUnknown	1	2621	67	42	24.3	162.6	52.5	54	105.7	0.8	0.45	1.54	0.45	-0.1047	0	0	-0.1247	0.0265	1	0	0	0	1.07	0.011	0	2.64	1.541
Tb927.11.16920	VEX1	RNA.synthesis	1.54			46.5	40.8	143.8	59.6	37.2	60.3	0.78	1.1	2.38	0.78	0.5059	0	0	-0.1691	0.0161	1	0	0	0	#N/A	-0.2507	0	2.64	1.4854
Tb927.8.850	hypothetical protein, conserved	ZUnknown	1.1			135.2	98.2	151.2	131	105	101.5	1.03	0.94	1.49	0.94	0.2058	0	0	-0.1027	0.144	0	0	0	0	#N/A	-0.3478	0	2.64	1.516
Tb927.10.11440	CYC5, CYC2-like cyclin, putative, G1 cyclin CycE4	Cell.cycle	1.62	4833	1256	48	42	294.1	55.9	101.6	215.5	0.86	0.41	1.36	0.41	-0.1899	0	0	-0.0258	0.74	0	0	0	0	1.21	-0.2812	0	2.63	1.5008
Tb927.11.15070	BBP119	Cytoskeleton	1	4208	937	79.1	42	190	87.8	74.5	123.1	0.9	0.56	1.54	0.56	0	0	0	-0.1498	0.0194	1	0	0	0	1.04	-0.1409	0	2.63	1.4957
Tb927.5.2600	methyltransferase domain containing protein, putative	ZUnknown	1	3251	427	32.3	21.3	124.2	47.1	39.2	79.3	0.69	0.54	1.57	0.54	-0.0995	0	0	-0.1199	0.0964	0	0	0	0	1.26	-0.4386	0	2.63	1.5656
Tb927.7.6730	hypothetical protein, conserved	ZUnknown	1	2484	236	21	16.9	94.7	28.8	48.4	49.5	0.73	0.35	1.91	0.35	-0.0048	0	0	-0.0349	0.709	0	0	0	0	1.12	-0.1292	0	2.63	1.5261
Tb927.4.500	FHA domain containing protein, putative	ZUnknown	1	1952	616	72.9	101.3	177.3	54	40.2	37.7	1.35	2.52	4.7	1.35	1.5143	0	0	-0.244	0.00485	1	0	0	0	1.07	-0.3929	0	2.63	1.5558
Tb927.10.9310	Haemolysin-III related, putative	ZUnknown	1	1222	5	253.1	169.5	111.7	151.4	94.9	79.5	1.67	1.79	1.41	1.41	0.699	0	0	-0.0228	0.824	0	0	0	0	0.9	-0.2119	0	2.63	1.541
Tb927.3.4570	UDP-GlcNAc:PI a1-6 GlcNAc-transferase, putative	Glycans	1.46			103.9	69.4	197.1	129.1	107.1	142.9	0.8	0.65	1.38	0.65	-0.0842	0	0	0.0161	0.831	0	0	0	0	#N/A	-0.3332	0	2.63	1.5311
Tb927.10.10810	adenosine deaminase-like protein	Nucleotides	1			12.8	3.9	102.2	17.1	11.4	39.3	0.75	0.34	2.6	0.34	0.2987	0	0	0.1058	0.27	0	0	0	0	#N/A	-0.4715	0	2.63	1.8718
Tb927.9.7040	hypothetical protein, conserved	ZUnknown	1			46.9	104.7	103.6	55.1	60	50.2	0.85	1.75	2.06	0.85	0.6354	0	0	0.4136	1.07e-07	1	0	0	0	#N/A	-0.1204	0	2.63	1.541
Tb927.10.9690	predicted C2 domain protein	ZUnknown	1	6681	928	53.7	33.8	368	69.5	47.2	132.9	0.77	0.72	2.77	0.72	0.5059	0	0	0.0977	0.0934	0	0	0	0	1.08	-0.5789	0	2.62	1.5311
Tb927.11.14070	RDK1 protein kinase	Protein.kinase	1	4722	1093	191.6	200	1068	231.7	137.6	193.4	0.83	1.45	5.52	0.83	1.3785	0	0	0.1029	0.0331	1	0	0	0	1.18	1.0201	0	2.62	1.7398
Tb927.7.5240	hypothetical protein, conserved, low homologies, no domains	ZUnknown	1.42	3452	1528	104.2	84.1	202.1	50.6	59.2	69.3	2.06	1.42	2.92	1.42	1.0931	0	0	0.5164	7.05e-17	1	0	0	0	1.27	-0.279	0	2.62	1.5008
Tb927.5.4340	BBP65	Cytoskeleton	1	2194	406	46.5	71.1	102.8	39.4	50.6	46.9	1.18	1.41	2.19	1.18	0.672	0	0	0.1999	0.006	1	0	0	0	1.03	-0.1066	0	2.62	1.585
Tb927.5.4070	PPL1 priming DNA polymerase	DNA	1	2057	189	38.8	36.6	94.5	49.4	49.8	61.9	0.79	0.73	1.53	0.73	0.0238	0	0	0.1731	0.00836	1	0	0	0	1	-0.1997	0	2.62	1.5607
Tb927.8.2480	3-oxo-5-alpha-steroid 4-dehydrogenase-like, putative	Sterols	1.1	1772	707	181.7	192.9	154.3	109	49.1	42.4	1.67	3.93	3.64	1.67	1.6229	0	0	0.0705	0.478	0	0	0	0	1.22	-0.3638	0	2.62	1.5211
Tb927.10.12120	hypothetical protein, conserved, TPR domain	ZUnknown	1.38			89.6	55.3	652.7	148.7	133.8	376.1	0.6	0.41	1.74	0.41	-0.1255	0	0	-0.0453	0.339	0	0	0	0	#N/A	-0.2574	0	2.62	1.5211
Tb927.5.3320	protein kinase, putative	Protein.kinase	1	4909	1066	145.4	86	424.6	195	209.1	275.9	0.75	0.41	1.54	0.41	-0.152	0	0	0.0848	0.101	0	0	0	0	1.12	-0.5416	0	2.61	1.5261
Tb927.11.6680	AAT15 Polyamine transporter 2 POT2	Amino.acid.transport	1	2581	989	44.8	39.5	86.8	43.7	31.3	35.6	1.03	1.26	2.44	1.03	0.6569	0	0	0.3242	0.000281	1	0	0	0	1.14	-0.2485	0	2.61	1.6599
Tb927.9.12850	SpoU rRNA Methylase family, putative	Mito.translation	1	2021	73	42.9	33.6	66.6	48.8	51	65.2	0.88	0.66	1.02	0.66	-0.2288	0	0	0.0913	0.203	0	0	0	0	1.18	-0.0192	0	2.61	1.511
Tb927.10.1260	aspartyl-tRNA synthetase, putative	Translation.tRNA	1	1892	120	34.2	26	105.7	46.7	35.9	63.1	0.73	0.72	1.68	0.72	0.0612	0	0	0.0831	0.303	0	0	0	0	1.24	-0.2821	0	2.61	1.6415
Tb927.10.13910	hypothetical protein, conserved	ZUnknown	1	1103	490	19.5	22.5	36.7	20.2	21.8	18.5	0.97	1.03	1.98	0.97	0.4078	0	0	0.2565	0.017	1	0	0	0	1.09	0.1185	0	2.61	1.4906
Tb927.11.11640	DNA replication licensing factor MCM6	DNA	1			35.1	24.6	115.7	44.5	47.1	89.2	0.79	0.52	1.3	0.52	-0.2009	0	0	-0.0047	0.959	0	0	0	0	#N/A	-0.17	0	2.61	1.516
Tb927.8.6740	DNA repair protein, putative	DNA	1			118.9	102.4	142.6	142.8	157.1	123.6	0.83	0.65	1.15	0.65	-0.1899	0	0	0.0767	0.291	0	0	0	0	#N/A	-0.1741	0	2.61	1.5361
Tb927.3.4430	hypothetical protein, conserved	ZUnknown	1			40.9	32.1	111.6	40.5	55.5	76.8	1.01	0.58	1.45	0.58	0.0191	0	0	0.072	0.373	0	0	0	0	#N/A	-0.2598	0	2.61	1.5558
Tb927.8.4960	hypothetical protein, conserved	ZUnknown	1.24			29.7	13.8	146.3	50.7	39.2	90.7	0.59	0.35	1.61	0.35	-0.2345	0	0	-0.3202	6.99e-08	1	0	0	0	#N/A	-0.2154	0	2.61	1.6182
Tb927.7.1480	hypothetical protein, conserved	ZUnknown	1			45.9	36.3	64.4	31.4	20.3	21.8	1.46	1.79	2.95	1.46	1.0473	0	0	0.3102	0.00153	1	0	0	0	#N/A	-0.1708	0	2.61	1.6323
Tb927.6.3580	RECQ1 ATP-dependent DEAD/H DNA helicase	DNA	1	3016	205	67.2	39.7	113.4	86.5	57.5	84.1	0.78	0.69	1.35	0.69	-0.0893	0	0	-0.4623	5.43e-10	1	0	0	0	1.03	-0.2534	0	2.6	1.4542
Tb927.11.310	hypothetical protein, conserved	ZUnknown	1	2672	571	99.8	125	204.8	85	74.8	80.9	1.17	1.67	2.53	1.17	0.84	0	0	0.2648	0.000221	1	0	0	0	1.21	0.1353	0	2.6	1.5753
Tb927.10.4720	Ankyrin repeats (many copies), putative	ZUnknown	1	2188	966	39.7	44	71.8	18.6	33.9	41.5	2.13	1.3	1.73	1.3	0.7824	0	0	0.0699	0.456	0	0	0	0	1	-0.0348	0	2.6	1.7355
Tb927.11.16680	tRNA pseudouridine synthase D (TruD), putative	ZUnknown	1	2149	132	16.5	6.4	76.9	21.7	14.1	29	0.76	0.45	2.65	0.45	0.3636	0	0	0.0575	0.524	0	0	0	0	1.17	-0.2634	0	2.6	1.8074
Tb927.8.1820	nonspecific lipid-transfer protein, putative,sterol carrier protein, putative	Lipids	1	1528	251	21.1	16.2	59.8	31.1	34.9	40.7	0.68	0.46	1.47	0.46	-0.2009	0	0	0.1245	0.11	0	0	0	0	1.12	-0.0934	0	2.6	1.6276
Tb927.7.3640	hypothetical protein, conserved	ZUnknown	1	1249	41	118.7	61.3	170.5	95	83.6	91.4	1.25	0.73	1.87	0.73	0.3599	0	0	0.1632	0.0465	1	0	0	0	1.1	-0.0713	0	2.6	1.511
Tb927.7.3970	hypothetical protein, conserved	ZUnknown	1	5589	4223	123	127.8	334	68.3	62	101.5	1.8	2.06	3.29	1.8	1.253	0	0	-0.1292	0.108	0	0	0	0	1.2	0.1282	0	2.59	1.5607
Tb927.10.13330	paraflagellar rod protein PFC20	Cytoskeleton	1.25	5220	1109	107.4	71.7	355.6	153.8	107.5	170.3	0.7	0.67	2.09	0.67	0.2058	0	0	-0.0028	0.966	0	0	0	0	1.14	-0.58	0	2.59	1.5311
Tb927.6.2890	single strand-specific nuclease, putative	DNA	1	1994	1032	264.6	243.3	140.1	133.8	52.6	37.9	1.98	4.63	3.7	1.98	1.781	0	0	-0.5143	2.16e-09	1	0	0	0	1.12	-0.6116	1	2.59	1.4594
Tb927.9.10970	Bem46-like serine peptidase,Serine peptidase, Clan SC, Family S09X	Protease	1	1845	342	90.4	184.6	258	58.6	29.2	46.9	1.54	6.32	5.5	1.54	2.1549	0	0	-0.1831	0.0263	1	0	0	0	1.1	-0.0849	0	2.59	1.4751
Tb927.11.5110	hypothetical protein, conserved	ZUnknown	1	1704	294	62.3	33	71.4	49.3	41.7	51	1.26	0.79	1.4	0.79	0.2016	0	0	-0.05	0.56	0	0	0	0	0.93	-0.2097	0	2.59	1.5607
Tb927.4.820	TFIIF-stimulated CTD phosphatase, putative	Protein.phosphatase	1	1645	353	32.8	39.3	74.2	25.2	31.8	33.3	1.3	1.24	2.23	1.24	0.669	0	0	-0.5187	4.17e-10	1	0	0	0	1	-0.3132	0	2.59	1.6323
Tb927.4.1490	hypothetical protein, conserved	ZUnknown	1			85.3	50	132	96.7	55.2	73.9	0.88	0.91	1.79	0.88	0.255	0	0	0.217	0.00282	1	0	0	0	#N/A	-0.2297	0	2.59	1.5753
Tb927.11.15890	hypothetical protein, conserved	ZUnknown	1			68.5	47.8	172.6	60.2	39.3	60.4	1.14	1.22	2.86	1.14	0.7991	0	0	0.0914	0.22	0	0	0	0	#N/A	-0.2725	0	2.59	1.6182
Tb927.8.3180	Protein of unknown function (DUF3250), putative	ZUnknown	1	4277	518	50.6	28.8	173.4	64.2	71.2	102.8	0.79	0.4	1.69	0.4	-0.0589	0	0	-0.0474	0.49	0	0	0	0	1.13	-0.2473	0	2.58	1.5993
Tb927.7.860	hypothetical protein, conserved	ZUnknown	1	4139	645	76.5	80.3	195.5	67.9	34	44.7	1.13	2.36	4.37	1.13	1.3896	0	0	0.2859	6.1e-05	1	0	0	0	1.09	-0.2448	0	2.58	1.5656
Tb927.11.4660	kinesin, MCAK-like KIF13-2, tip of flagellum	Cytoskeleton	1	2819	657	77.4	79.9	222.4	59.4	52.7	71.7	1.3	1.52	3.1	1.3	0.9806	0	0	0.2465	2.31e-05	1	0	0	0	0.94	0.4823	0	2.58	1.4168
Tb927.11.2180	hypothetical protein, conserved	ZUnknown	1	2188	218	49.4	42.6	98.6	66.8	64.6	57	0.74	0.66	1.73	0.66	0.0612	0	0	0.1071	0.129	0	0	0	0	1.2	-0.2877	0	2.58	1.6554
Tb927.11.12290	hypothetical protein, conserved	ZUnknown	1	1546	21	74.5	52.1	123.1	70.4	104.4	122.9	1.06	0.5	1	0.5	-0.2288	0	0	0.1508	0.0146	1	0	0	0	1	-0.0835	0	2.58	1.4906
Tb927.10.15800	actin related protein 2, putative	Cytoskeleton	1.83	1438	145	47.8	28.1	73.4	64.6	42.5	44.1	0.74	0.66	1.66	0.66	0.0286	0	0	-0.0609	0.532	0	0	0	0	1.11	-0.2968	0	2.58	1.511
Tb927.9.14100	hypothetical protein, conserved	ZUnknown	1	1366	384	245.9	358	322.2	133.4	87.8	72.7	1.84	4.08	4.43	1.84	1.7866	0	0	-0.1013	0.175	0	0	0	0	0.97	0.6038	0	2.58	1.4594
Tb927.3.4120	hypothetical protein, conserved	ZUnknown	1			60.8	34.2	186.3	85.5	69	100.8	0.71	0.5	1.85	0.5	0.0286	0	0	-0.03	0.672	0	0	0	0	#N/A	-0.2113	0	2.58	1.541
Tb927.11.9820	Protein of unknown function (DUF1619), putative	ZUnknown	1			160.8	87.5	104.5	126.4	94.5	105	1.27	0.93	1	0.93	0.0931	0	0	0.0047	0.958	0	0	0	0	#N/A	-0.0729	0	2.58	1.546
Tb927.8.3230	hypothetical protein, conserved	ZUnknown	1			41.2	26.8	144.1	51.9	41.4	52.6	0.79	0.65	2.74	0.65	0.4785	0	0	0.4083	9.95e-11	1	0	0	0	#N/A	-0.3227	0	2.58	1.6088
Tb927.10.6250	hypothetical protein, conserved	ZUnknown	2.01			39.8	27.3	120.3	38.7	51.6	59.1	1.03	0.53	2.04	0.53	0.263	0	0	-0.0791	0.327	0	0	0	0	#N/A	-0.3014	0	2.58	1.6915
Tb927.9.14190	hypothetical protein, conserved	ZUnknown	1	4693	612	15.3	14	196.2	18.8	14.6	35.8	0.81	0.96	5.48	0.81	1.273	0	0	0.3289	9.21e-07	1	0	0	0	1.12	-0.2533	0	2.57	1.7908
Tb927.10.14920	hypothetical protein, conserved, no clear yeast or human match	ZUnknown	1	4013	453	59.3	73.7	389.9	69.9	87.6	125.7	0.85	0.84	3.1	0.84	0.6751	0	0	-0.6974	1.97e-33	1	0	0	1	1.17	-0.1875	0	2.57	1.5261
Tb927.4.3920	CRAL/TRIO domain containing protein, putative	ZUnknown	1	3812	538	125.9	81	272.2	147.8	85.3	128.7	0.85	0.95	2.11	0.85	0.3822	0	0	-0.5853	1.66e-24	1	0	0	1	1.04	-0.1653	0	2.57	1.4699
Tb927.11.4640	calpain-like protein, putative	Protease	1	3792	310	41.5	26.3	121.7	52.9	44.1	89.9	0.78	0.6	1.35	0.6	-0.1361	0	0	0.1422	0.0192	1	0	0	0	1.04	-0.0388	0	2.57	1.4751
Tb927.10.12340	hypothetical protein, conserved	ZUnknown	1.76	2845	126	19.9	13.8	91.9	21.5	20.5	37.6	0.93	0.67	2.44	0.67	0.4294	0	0	-0.0898	0.35	0	0	0	0	1.86	-0.3918	0	2.57	1.6088
Tb927.10.7370	hypothetical protein, conserved	ZUnknown	1	2291	102	33.3	26.2	84.1	52.9	31.5	34.7	0.63	0.83	2.42	0.63	0.3711	0	0	0.1889	0.0287	1	0	0	0	0.98	-0.3228	0	2.57	1.7782
Tb927.5.3980	mitochondrial ribosomal protein L15	Mito.translation	1	1545	243	67.2	39.7	77.6	54.6	44.5	64.2	1.23	0.89	1.21	0.89	0.1506	0	0	0.1915	0.0171	1	0	0	0	0.96	-0.1655	0	2.57	1.433
Tb927.7.5710	hypothetical protein, conserved	ZUnknown	1	1294	329	53.4	55	73.3	45.1	26.4	29.3	1.18	2.08	2.5	1.18	0.9411	0	0	-0.2343	0.023	1	0	0	0	0.91	0.0389	0	2.57	1.6462
Tb927.8.2370	DCL1	RNA.degradation	1.07			59.3	31.7	267.7	74.6	81.4	199	0.79	0.39	1.35	0.39	-0.2458	0	0	0.0909	0.0614	0	0	0	0	#N/A	-0.395	0	2.57	1.4542
Tb927.11.9310	tRNA pseudouridine synthase, putative	rRNA.tRNA.process	1		42	59	41.7	118.1	63.3	86.6	89.3	0.93	0.48	1.32	0.48	-0.1361	0	0	-0.346	3.95e-08	1	0	0	0	1.17	-0.1473	0	2.57	1.5945
Tb927.11.15930	Probable TRAPP subunit 4	Vesicular.transport	1.33			42.3	47.3	55.5	18.3	22	30.7	2.31	2.15	1.81	1.81	1.0635	0	0	-0.0529	0.646	0	0	0	0	#N/A	-0.1977	0	2.57	1.4699
Tb927.11.300	hypothetical protein, conserved	ZUnknown	1			53.5	111.4	92	34.5	37.1	34.1	1.55	3	2.7	1.55	1.273	0	0	-0.255	0.0204	1	0	0	0	#N/A	0.0764	0	2.57	1.4436
Tb927.7.2220	hypothetical protein, conserved	ZUnknown	1.98			82.5	74.8	190.4	99.7	91.2	88	0.83	0.82	2.16	0.82	0.3448	0	0	-0.3594	1.27e-08	1	0	0	0	#N/A	-0.1476	0	2.57	1.4803
Tb927.5.4130	hypothetical protein, conserved	ZUnknown	1			43.8	32	182.7	72.7	67.6	140.4	0.6	0.47	1.3	0.47	-0.3401	0	0	-0.0438	0.469	0	0	0	0	#N/A	-0.343	0	2.57	1.5509
Tb927.7.4110	Kinesin-like but poor match	Cytoskeleton	1	4993	2101	77	74.4	710.8	75.6	52.7	93.7	1.02	1.41	7.59	1.02	1.7398	0	0	0.0028	0.973	0	0	0	0	1.18	-0.0431	0	2.56	1.5705
Tb927.6.1480	hypothetical protein, conserved	ZUnknown	1	4965	323	128.7	59.6	367.2	187.5	158.2	333.8	0.69	0.38	1.1	0.38	-0.4673	0	0	0.0475	0.331	0	0	0	0	0.97	-0.403	0	2.56	1.3785
Tb927.11.12310	CRK12 cdc2- like protein kinase	Cell.cycle	1	3797	1052	64.7	53.7	299.6	49.1	66.1	147.3	1.32	0.81	2.03	0.81	0.4716	0	0	0.0154	0.822	0	0	0	0	1.37	-0.1181	0	2.56	1.4803
Tb927.9.9280	hypothetical protein, conserved	ZUnknown	1			41.4	33	81.6	33	58.9	74	1.25	0.56	1.1	0.56	-0.0439	0	0	-0.6278	2.02e-21	1	0	0	1	#N/A	-0.1943	0	2.56	1.5261
Tb927.3.3360	acyltransferase, putative	Lipids	1			93.5	61.4	187.8	116.2	95.8	119.4	0.8	0.64	1.57	0.64	0.0048	0	0	-0.1026	0.155	0	0	0	0	#N/A	-0.3199	0	2.56	1.5945
Tb927.10.11910	major facilitator superfamily, putative	ZUnknown	1.31			72.6	96	169.7	69.1	69.8	67.7	1.05	1.38	2.51	1.05	0.7195	0	0	-0.0226	0.805	0	0	0	0	#N/A	-0.2436	0	2.56	1.4276
Tb927.7.2950	ATPase family associated with various cellular activities (AAA), putative	ZUnknown	1			81.2	77.6	256.9	86.6	115.6	150.7	0.94	0.67	1.7	0.67	0.1419	0	0	-0.1327	0.0519	0	0	0	0	#N/A	0.0761	0	2.56	1.5211
Tb927.7.6670	hypothetical protein, conserved	ZUnknown	1.26	10333	907	81.5	33.5	506	143	214.8	389	0.57	0.16	1.3	0.16	-0.5635	0	0	-0.3006	8.7e-11	1	0	0	0	1.08	0.1773	0	2.55	1.511
Tb927.4.4480	hypothetical protein, conserved	ZUnknown	1	6636	3756	63.3	38.5	194.3	70.6	85.9	152.3	0.9	0.45	1.28	0.45	-0.1899	0	0	-0.2619	6.45e-06	1	0	0	0	1.03	0.1412	0	2.55	1.4276
Tb927.5.3670	DNA repair protein XPF, putative	DNA	1	4229	496	75.4	66.1	398.6	114.6	109.3	182.2	0.66	0.6	2.19	0.6	0.2016	0	0	0.0199	0.75	0	0	0	0	1.08	-0.334	0	2.55	1.5509
Tb927.2.4470	hypothetical protein, conserved	ZUnknown	1	2917	465	104.2	145	253.1	90.9	63.4	68.8	1.15	2.29	3.68	1.15	1.2469	0	0	0.1047	0.144	0	0	0	0	1	-0.3186	0	2.55	1.516
Tb927.5.3500	SET domain containing protein, putative	ZUnknown	1	2858	1024	65.1	30.5	120.4	69.4	31.9	52.7	0.94	0.96	2.28	0.94	0.4785	0	0	0.0754	0.367	0	0	0	0	1.04	-0.5823	0	2.55	1.4906
Tb927.9.8510	hypothetical protein, conserved	ZUnknown	1	2466	335	89.4	87.5	168.4	80.4	110.5	115.5	1.11	0.79	1.46	0.79	0.1635	0	0	0.077	0.212	0	0	0	0	1.07	-0.1449	0	2.55	1.516
Tb927.10.1950	leucine-rich repeat protein (LRRP)	LRRP	1.09	2376	184	16.5	12.3	109.3	26	28.3	63.6	0.63	0.43	1.72	0.43	-0.1099	0	0	-0.1258	0.0776	0	0	0	0	0.92	-0.3147	0	2.55	1.541
Tb927.8.2750	hypothetical protein, conserved	ZUnknown	1	2035	569	95.8	97.3	142.1	63.9	76	72.2	1.5	1.28	1.97	1.28	0.663	0	0	0.1278	0.101	0	0	0	0	1	-0.2472	0	2.55	1.4542
Tb927.11.9990	glycosyl transferase-like protein	Glycans	1	2003	148	25.3	17	62.3	38.3	29.1	30.7	0.66	0.58	2.03	0.58	0.1243	0	0	-0.106	0.263	0	0	0	0	1.03	-0.0514	0	2.55	1.4489
Tb927.7.3290	WD domain, G-beta repeat, putative	ZUnknown	1	1476	100	35.5	21.3	68.3	35.6	38.2	46.4	1	0.56	1.47	0.56	0.0144	0	0	0.0547	0.563	0	0	0	0	1.25	-0.1744	0	2.55	1.4647
Tb927.4.4790	hypothetical protein, conserved	ZUnknown	1	961	30	67.5	129	121.9	43.4	34.8	34.1	1.56	3.71	3.57	1.56	1.5591	0	0	0.027	0.814	0	0	0	0	0.74	1.2996	0	2.55	1.5008
Tb927.8.8360	GRESAG 4, putative receptor-type adenylate cyclase	GRESAG	1			16.5	8	94.1	14.9	14.4	34.5	1.11	0.56	2.73	0.56	0.5525	0	0	-1.3732	1.04e-37	1	0	0	1	#N/A	-0.5504	0	2.55	1.6781
Tb927.9.3930	Telomere binding complex protein	DNA	2.25			70	48	246.3	37.4	49.2	86.2	1.87	0.98	2.86	0.98	0.9285	0	0	0.0454	0.528	0	0	0	0	#N/A	0.2638	0	2.55	1.8074
Tb927.8.6210	PI3 kinase Class (III)	Signalling	1			49	32	210.2	62.3	55.6	133.2	0.79	0.58	1.58	0.58	-0.0242	0	0	0.0322	0.635	0	0	0	0	#N/A	-0.494	0	2.55	1.516
Tb927.9.4620	TbNedd8 activating enzyme subunit TbUba3 *	Ubiquitin.proteasome	1			48.6	38.8	111.4	37.5	55.8	73.4	1.3	0.7	1.52	0.7	0.2306	0	0	0.0874	0.218	0	0	0	0	#N/A	-0.302	0	2.55	1.4647
Tb927.3.4540	NOL1/NOP2/sun family, putative	ZUnknown	1			20.2	14.6	81.1	26.4	32.3	47.7	0.77	0.45	1.7	0.45	-0.039	0	0	0.0415	0.652	0	0	0	0	#N/A	-0.1231	0	2.55	1.6135
Tb927.11.16940	MIZ/SP-RING zinc finger, putative	ZUnknown	1.84			36	29	81.4	32.4	17.6	29.9	1.11	1.65	2.72	1.11	0.8692	0	0	0.083	0.472	0	0	0	0	#N/A	-0.2949	0	2.55	1.6781
Tb927.4.4510	protein phosphatase 2C, putative	Protein.phosphatase	1	9229	2512	55.9	42	648.4	80.6	96.3	229.8	0.69	0.44	2.82	0.44	0.3969	0	0	-0.4317	8.09e-16	1	0	0	0	1.24	-0.1778	0	2.54	1.4005
Tb927.3.1910	SLBP1, histone RNA binding domain 259-326	RNA.binding	1	6571	3931	44.7	33.7	271.3	40	29.9	49.4	1.12	1.13	5.49	1.12	1.3674	0	0	0.1546	0.0098	1	0	0	0	1.19	-0.8852	1	2.54	1.4005
Tb927.11.10550	hypothetical protein, conserved	ZUnknown	1	3103	501	72.8	103.3	181.1	54.9	50.4	89.7	1.33	2.05	2.02	1.33	0.848	0	0	0.183	0.00659	1	0	0	0	1.13	-0.2502	0	2.54	1.516
Tb927.10.3110	DNA primase large subunit, putative	DNA	1	2196	412	68.9	56.4	121.1	50.8	35.4	57.1	1.36	1.59	2.12	1.36	0.757	0	0	0.0065	0.946	0	0	0	0	1.01	-0.0133	0	2.54	1.5898
Tb927.5.1750	conserved protein, unknown function	ZUnknown	1	1974	269	30	21.2	77.8	33.2	29	40.3	0.9	0.73	1.93	0.73	0.2469	0	0	-0.2116	0.0109	1	0	0	0	1	-0.3064	0	2.54	1.5509
Tb927.8.4940	hypothetical protein, conserved	ZUnknown	1	1916	35	143.3	130.1	261.9	111.6	109.8	127.1	1.28	1.18	2.06	1.18	0.5914	0	0	0.0762	0.324	0	0	0	0	2.33	-0.0422	0	2.54	1.3785
Tb927.7.2060	DNA repair protein ERCC1, putative	DNA	1			21.8	10.3	46.8	22.2	14.5	27	0.98	0.71	1.73	0.71	0.189	0	0	-0.8945	2.18e-22	1	0	0	1	#N/A	-0.6842	1	2.54	1.5361
Tb927.7.2050	R3H domain containing protein, putative	ZUnknown	1			34.8	17.9	126.4	40.9	38.2	74.6	0.85	0.47	1.69	0.47	0.0048	0	0	-0.8491	9.48e-43	1	0	0	1	#N/A	-0.2147	0	2.54	1.6276
Tb927.11.15470	methionyl-tRNA formyltransferase	Mito.pathway	1.97			39.2	31.4	97.8	52.1	68.9	82.3	0.75	0.46	1.19	0.46	-0.3219	0	0	0.147	0.0418	1	0	0	0	#N/A	-0.1511	0	2.54	1.5993
Tb927.3.2110	TFIIF-stimulated CTD phosphatase, putative	Protein.phosphatase	1			74	55.5	150.6	51.2	32.6	47.5	1.45	1.7	3.17	1.45	1.075	0	0	0.0295	0.765	0	0	0	0	#N/A	1.7509	0	2.54	1.5059
Tb927.9.9450	ZC3H28	RNA.binding	1			204	203.7	265.3	202.5	259.3	348	1.01	0.79	0.76	0.76	-0.2288	0	0	-0.3027	6.28e-08	1	0	0	0	#N/A	-0.2784	0	2.54	1.7866
Tb927.7.3300	Possible homologue of yeast DAL81, which affects pol II transcription in yeast but also has unrelated interactions, e.g. TOR1	RNA.synthesis	1			28	38.8	144.4	29.8	34.1	47.4	0.94	1.14	3.05	0.94	0.774	0	0	-0.1328	0.08	0	0	0	0	#N/A	-0.3864	0	2.54	1.585
Tb927.1.1140	Transmembrane protein 231, putative	ZUnknown	1.96			67.8	77.8	153.6	56	55.1	64.6	1.21	1.41	2.38	1.21	0.737	0	0	0.1744	0.0244	1	0	0	0	#N/A	-0.1416	0	2.54	1.5945
Tb927.7.5200	hypothetical protein, conserved	ZUnknown	1			57	32.7	141	65.4	63.9	64.6	0.87	0.51	2.18	0.51	0.2469	0	0	0.1007	0.151	0	0	0	0	#N/A	-0.0512	0	2.54	1.7442
Tb927.8.7720	hypothetical protein, conserved	ZUnknown	1	3700	2764	48.4	69.9	154.2	35.5	38.1	58.3	1.36	1.83	2.64	1.36	0.9585	0	0	0.171	0.0306	1	0	0	0	1.64	1.3589	0	2.53	1.4114
Tb927.11.6260	hypothetical protein, conserved	ZUnknown	1	3343	910	65.4	71.7	244.1	64.4	68.1	105	1.02	1.05	2.32	1.02	0.5493	0	0	0.2107	0.000845	1	0	0	0	1.07	-0.3292	0	2.53	1.5361
Tb927.3.1220	GIY-YIG catalytic domain containing protein, putative	ZUnknown	2.01	2118	253	92.1	109.1	119.9	61.6	73	64.8	1.5	1.49	1.85	1.49	0.69	0	0	0.4074	2.28e-09	1	0	0	0	1.03	-0.1906	0	2.53	1.4906
Tb927.9.7100	hypothetical protein, conserved	ZUnknown	1	1531	687	110.5	180	97.5	67.9	42	19.8	1.63	4.29	4.92	1.63	1.8533	0	0	0.5754	1.28e-08	1	0	0	0	1.09	0.311	0	2.53	1.7312
Tb927.7.5110	hypothetical protein, conserved	Mito.pathway	1			30.5	17.6	118.4	30	29.9	61.5	1.02	0.59	1.93	0.59	0.2388	0	0	0.0365	0.634	0	0	0	0	#N/A	-0.0928	0	2.53	1.6736
Tb927.1.3220	TBC-M likely GAP	Signalling	1			48.5	54.4	72.3	60	98	102.9	0.81	0.56	0.7	0.56	-0.5353	0	0	0.1713	0.0106	1	0	0	0	#N/A	-0.1879	0	2.53	1.4542
Tb927.11.8330	hypothetical protein, conserved, 4 C2H2 Zn fingers	Zinc.finger	1			139.8	124.9	370.9	71.8	43.8	64.9	1.95	2.85	5.71	1.95	1.8087	0	0	1.5151	2.22e-152	1	0	1	0	#N/A	0.0768	0	2.53	1.516
Tb927.11.10460	GINS complex protein, putative	ZUnknown	1			37.7	32.5	59.5	28.2	40	52.6	1.34	0.81	1.13	0.81	0.1287	0	0	0.173	0.0382	1	0	0	0	#N/A	-0.1576	0	2.53	1.384
Tb927.11.6940	hypothetical protein, conserved	ZUnknown	1			29	17.5	44.5	29.2	28.4	35.9	0.99	0.62	1.24	0.62	-0.074	0	0	0.11	0.247	0	0	0	0	#N/A	-0.3616	0	2.53	1.4647
Tb927.10.11140	hypothetical protein, conserved, kineto-specific, signal peptide	ZUnknown	1			114.9	57.2	332.6	181.7	347.7	437.7	0.63	0.16	0.76	0.16	-0.9527	0	0	0.1301	0.00413	1	0	0	0	#N/A	-0.1136	0	2.53	1.6041
Tb927.10.11480	hypothetical protein, conserved	ZUnknown	1.15			15.8	8.8	72.7	21.9	25.3	37.7	0.72	0.35	1.93	0.35	0	0	0	-0.1234	0.0848	0	0	0	0	#N/A	-0.2254	0	2.53	1.6182
Tb927.10.1540	ZC3H30	RNA.binding	1.62	5394	3270	75.6	58.8	330.6	37.6	48.8	81.3	2.01	1.2	4.07	1.2	1.279	0	0	-0.3999	3.58e-09	1	0	0	0	1.07	1.0107	0	2.52	1.4114
Tb927.3.5450	BBP96	Cytoskeleton	1	3528	792	48.3	23.5	145.8	52.2	45.9	116.7	0.93	0.51	1.25	0.51	-0.1574	0	0	-0.015	0.838	0	0	0	0	1.02	-0.3544	0	2.52	1.4222
Tb927.10.1350	hypothetical protein, conserved	ZUnknown	1.52	2870	881	84.8	102.1	211.3	58.3	72.8	149.2	1.45	1.4	1.42	1.4	0.5093	0	0	-0.2128	0.000126	1	0	0	0	1.14	0.2543	0	2.52	1.541
Tb927.10.15670	hypothetical protein, conserved	ZUnknown	2.01	2614	458	100.8	98.3	122	102.1	140	114.1	0.99	0.7	1.07	0.7	-0.1203	0	0	-0.0487	0.48	0	0	0	0	1.14	-0.168	0	2.52	1.4542
Tb927.9.13130	hypothetical protein, conserved	ZUnknown	1	2197	296	43.7	33.6	59.2	35.8	29.9	39.1	1.22	1.12	1.51	1.12	0.3599	0	0	-0.0502	0.582	0	0	0	0	1.03	-0.0095	0	2.52	1.4542
Tb927.2.3160	Gar1/Naf1 RNA binding region, putative	ZUnknown	1	1734	405	95.8	97.7	179.9	62.2	45.1	46.5	1.54	2.17	3.87	1.54	1.3372	0	0	-0.3988	8.21e-07	1	0	0	0	1.05	-0.224	0	2.52	1.4542
Tb927.10.14950	ZC3H40	RNA.binding	1.13	1613	140	117.9	145.2	323.8	99.7	60.6	89.6	1.18	2.4	3.61	1.18	1.261	0	0	0.6594	3.52e-30	1	0	1	0	1.01	0.5696	0	2.52	1.4005
Tb927.2.5250	tubulin-tyrosine ligase, putative	Cytoskeleton	1	1354	140	69.5	108	144.2	76.1	106.6	96.3	0.91	1.01	1.5	0.91	0.189	0	0	0.2199	0.000471	1	0	0	0	1.51	-0.0851	0	2.52	1.5311
Tb927.10.12530	chaperone DNAj, putative, J13	Chaperone	1			28.4	25.5	29.4	29.4	26.4	28.2	0.97	0.97	1.04	0.97	-0.0097	0	0	0.2285	0.0227	1	0	0	0	#N/A	-0.3737	0	2.52	1.406
Tb927.7.610	DNA ligase, putative,mitochondrial DNA ligase homolog, putative	DNA	1.7			288.8	371.7	426.4	97.5	171.9	260.3	2.96	2.16	1.64	1.64	1.1721	0	0	-0.3964	4.65e-15	1	0	0	0	#N/A	0.1229	0	2.52	1.4594
Tb927.10.10770	HAP2, membrane protein involved in gamete fusion	DNA	1.08			103.7	239.3	509.8	72.2	78.2	83.1	1.44	3.06	6.13	1.44	1.8251	0	0	0.4175	3.63e-11	1	0	0	0	#N/A	-0.3211	0	2.52	1.6135
Tb927.8.5210	CUL3 cullin	Ubiquitin.proteasome	1			49.8	36.3	152.1	78.5	58.2	87.6	0.63	0.62	1.74	0.62	-0.0048	0	0	-0.2241	4.23e-05	1	0	0	0	#N/A	-0.2521	0	2.52	1.5008
Tb927.7.4450	NuSAP3	ZUnknown	1			132.9	109.8	281.8	111	134.8	208.6	1.2	0.81	1.35	0.81	0.1635	0	0	-0.1014	0.0734	0	0	0	0	#N/A	-0.3013	0	2.52	1.5211
Tb927.9.4630	hypothetical protein, conserved	ZUnknown	1			44.8	23.9	228.2	68.3	69.3	168.3	0.66	0.34	1.36	0.34	-0.3462	0	0	0.157	0.00147	1	0	0	0	#N/A	-0.239	0	2.52	1.5898
Tb927.2.2650	hypothetical protein, conserved	ZUnknown	1.15	11221	572	60.8	42.4	700.7	140.7	146.1	334.1	0.43	0.29	2.1	0.29	-0.0893	0	0	-0.2396	2.9e-08	1	0	0	0	1.04	-0.1561	0	2.51	1.5059
Tb927.4.4530	hypothetical protein, conserved	ZUnknown	1.03	4055	266	58.8	47.7	276.3	60.1	92.1	168.4	0.98	0.52	1.64	0.52	0.0658	0	0	0.0716	0.331	0	0	0	0	1.03	-0.142	0	2.51	1.4489
Tb927.3.1440	AAA ATPase, putative,Spastin, putative	Enzyme	1	3032	369	34.7	29.7	110.2	31	50.1	98.1	1.12	0.59	1.12	0.59	-0.0842	0	0	0.0845	0.168	0	0	0	0	1.03	-0.2261	0	2.51	1.406
Tb927.11.12720	hypothetical protein, conserved	ZUnknown	3.13	2961	217	44.8	28.8	64.2	51.5	62.6	71.7	0.87	0.46	0.9	0.46	-0.4279	0	0	-0.0558	0.494	0	0	0	0	0.86	-0.1663	0	2.51	1.4957
Tb927.6.3350	hypothetical protein, conserved (YCF45-like)	Mito.pathway	1	1826	152	71.7	35.7	66.8	41.6	49.4	62.8	1.72	0.72	1.06	0.72	0.2224	0	0	0.1117	0.196	0	0	0	0	0.96	0.0462	0	2.51	1.4383
Tb927.10.13900	UDP-galactose transporter	Glycans	1	1557	243	60.8	53.7	87.8	42.9	45.3	60.1	1.42	1.19	1.46	1.19	0.4401	0	0	-0.0492	0.567	0	0	0	0	1.14	-0.0958	0	2.51	1.4383
Tb927.7.5360	Haemolysin-III related, putative	ZUnknown	1	1513	354	28	40	59.5	15.3	22.7	26.3	1.83	1.76	2.26	1.76	0.9635	0	0	0.0542	0.606	0	0	0	0	1.09	-0.3827	0	2.51	1.4436
Tb927.8.3130	S-adenosyl-methyltransferase mraW-like protein, putative	Amino.acids	1			20	7.8	59.4	16.6	21.5	36.5	1.2	0.36	1.63	0.36	0.0886	0	0	0.0885	0.361	0	0	0	0	#N/A	-0.5418	0	2.51	1.8278
Tb927.11.6750	DNA ligase, putative	DNA	1			23.9	27.2	99.9	29.9	28.1	34.2	0.8	0.97	2.92	0.8	0.6446	0	0	-0.1596	0.0432	1	0	0	0	#N/A	-0.2379	0	2.51	1.4436
Tb927.11.8400	Mitochondrial RNA processing endonuclease 1 (mRPN1)	Mito.RNA	1			61.8	50.6	79.5	43.5	39.9	48	1.42	1.27	1.66	1.27	0.5361	0	0	0.0209	0.82	0	0	0	0	#N/A	0.0499	0	2.51	1.373
Tb927.5.2510	hypothetical protein, conserved	ZUnknown	1			109.2	45	193.9	111.6	84.7	172.1	0.98	0.53	1.13	0.53	-0.1844	0	0	-0.1641	0.00183	1	0	0	0	#N/A	-0.4715	0	2.51	1.4854
Tb927.8.5700	hypothetical protein, conserved	ZUnknown	1			18.9	18	53.4	12.3	27.6	41.4	1.54	0.65	1.29	0.65	0.2141	0	0	0.1391	0.112	0	0	0	0	#N/A	-0.0908	0	2.51	1.5211
Tb927.4.1500	RNA editing associated helicase 2 (REH2) MRB 1 subunit	Mito.RNA	1	6930	414	96	70.7	471.9	135.2	165.7	359.8	0.71	0.43	1.31	0.43	-0.2922	0	0	-0.0909	0.039	1	0	0	0	1.12	-0.1735	0	2.5	1.4751
Tb927.5.2400	ubiquitin carboxyl-terminal hydrolase, Clan CA cysteine peptidase, family C12, putative	Ubiquitin.proteasome	1	5808	2030	128.4	119.9	290.8	118	105.6	162.1	1.09	1.14	1.79	1.09	0.4222	0	0	-0.2554	5.22e-08	1	0	0	0	1.25	0.4274	0	2.5	1.4699
Tb927.11.2880	KIN-A, kinesin, mitotic spindle	Cytoskeleton	1	4079	1006	62.4	46.9	238.5	61.9	54.7	103.7	1.01	0.86	2.3	0.86	0.4751	0	0	0.3833	1.32e-13	1	0	0	0	1.36	-0.1846	0	2.5	1.433
Tb927.1.580	phosphate-repressible phosphate permease, putative	Ions	2.53	2537	883	259	514.3	821.3	221.3	189.4	150.7	1.17	2.72	5.45	1.17	1.6385	0	0	0.4185	3.68e-16	1	0	0	0	1.12	-0.0284	0	2.5	1.6554
Tb927.6.1140	dolichyl-P-Man:GDP-Man5GlcNAc2-PP-dolichyl alpha-1,2-mannosyltransferase, putative	Glycans	1	2462	260	148.8	99	163.7	179.2	152.9	173.3	0.83	0.65	0.94	0.65	-0.31	0	0	-0.0304	0.662	0	0	0	0	1.14	-0.1606	0	2.5	1.3618
Tb927.9.1530	hypothetical protein, conserved	ZUnknown	1	2266	36	108.8	113.2	212.8	123.3	110.6	95.2	0.88	1.02	2.24	0.88	0.4647	0	0	0.3541	5.02e-09	1	0	0	0	1.17	-0.1328	0	2.5	1.4594
Tb927.11.5130	hypothetical protein, conserved	ZUnknown	1	2099	236	43.5	33.3	85.4	35	38.7	46.5	1.24	0.86	1.84	0.86	0.3932	0	0	-0.1559	0.0382	1	0	0	0	0.96	-0.2508	0	2.5	1.5261
Tb927.11.3870	katanin, putative	Protease	1			202.8	256.4	441.4	101.5	90.2	101.4	2	2.84	4.35	2	1.6151	0	0	-0.0368	0.62	0	0	0	0	#N/A	-0.0497	0	2.5	1.5945
Tb927.5.4360	hypothetical protein, conserved	ZUnknown	2.21			100.4	179.3	192.1	76	48.8	54.7	1.32	3.67	3.51	1.32	1.5025	0	0	0.2099	0.0176	1	0	0	0	#N/A	0.225	0	2.5	1.5059
Tb927.7.2420	GSK3-long glycogen synthase kinase-3 alpha	Glycans	1	5323	3332	91.6	97.3	381.1	48.9	37.6	41.3	1.87	2.59	9.23	1.87	2.1901	0	0	0.6782	4.48e-32	1	0	1	0	1.28	-0.9248	1	2.49	1.5801
Tb927.11.16470	hypothetical protein, conserved, no domains, K-specific	ZUnknown	1	4488	926	95.4	114	245.2	57.6	63.7	121.7	1.66	1.79	2.01	1.66	0.8639	0	0	0.0218	0.741	0	0	0	0	0.9	0.015	0	2.49	1.4489
Tb927.10.12470	hypothetical protein, conserved	ZUnknown	1	2497	804	36.1	40.7	130.6	31.4	48.9	67.1	1.15	0.83	1.95	0.83	0.3896	0	0	0.1111	0.117	0	0	0	0	1.07	-0.3498	0	2.49	1.5509
Tb927.9.8400	predicted zinc finger protein, RING finger	Ubiquitin.proteasome	1	2439	292	116.9	124.5	343.6	109.3	103.9	130.1	1.07	1.2	2.64	1.07	0.7108	0	0	-0.1553	0.0124	1	0	0	0	1.42	0.5504	0	2.49	1.406
Tb927.9.11960	hypothetical protein, conserved	ZUnknown	1	2090	104	109.1	75.7	127.9	101.4	77.7	65.3	1.08	0.97	1.96	0.97	0.4186	0	0	-0.0457	0.517	0	0	0	0	1.07	-0.1003	0	2.49	1.433
Tb927.10.2200	hypothetical protein, conserved	ZUnknown	1.11	1903	283	33.6	28.6	29.8	24.4	42.8	32.6	1.38	0.67	0.91	0.67	-0.0194	0	0	0.0797	0.391	0	0	0	0	1.09	0.1185	0	2.49	1.3618
Tb927.3.5480	hypothetical protein, conserved	ZUnknown	1	1856	350	139.3	113.8	103.6	127.5	40.9	41.8	1.09	2.78	2.48	1.09	1.0818	0	0	0.11	0.211	0	0	0	0	1.08	-0.4932	0	2.49	1.4114
Tb927.10.10310	hypothetical protein, conserved. metallo protease like	ZUnknown	1.93	1731	238	34.6	34.8	87.8	54.2	55.7	48.9	0.64	0.62	1.8	0.62	0.0286	0	0	0.0888	0.332	0	0	0	0	0.91	-0.2474	0	2.49	1.4168
Tb927.10.15770	hypothetical protein, conserved	ZUnknown	1	1700	222	27.7	35.8	72.9	24.8	61	73.6	1.12	0.59	0.99	0.59	-0.152	0	0	0.1807	0.0399	1	0	0	0	1.28	-0.1937	0	2.49	1.4489
Tb927.11.12690	hypothetical protein, conserved	ZUnknown	1	1626	559	10.2	8.2	37.8	8	13.2	25.1	1.28	0.62	1.51	0.62	0.1848	0	0	0.2603	0.0127	1	0	0	0	1.17	-0.2466	0	2.49	1.5558
Tb927.10.15840	hypothetical protein, conserved	ZUnknown	1.74			35.3	27.3	136.4	57	57.7	101.4	0.62	0.47	1.35	0.47	-0.2981	0	0	-0.0718	0.296	0	0	0	0	#N/A	-0.4626	0	2.49	1.546
Tb927.10.5390	hypothetical protein, conserved	ZUnknown	1.81	4574	391	239.6	141.3	358	284	292.6	355.3	0.84	0.48	1.01	0.48	-0.3646	0	0	0.3687	1.54e-15	1	0	0	0	1.83	0.1255	0	2.48	1.433
Tb927.1.3940	hypothetical protein, conserved	ZUnknown	1	3283	179	47.6	34.1	150.6	48.9	77.8	116.2	0.97	0.44	1.3	0.44	-0.1467	0	0	0.09	0.166	0	0	0	0	1.12	-0.3049	0	2.48	1.4957
Tb927.10.10150	hypothetical protein, conserved	ZUnknown	1	2401	368	26.6	22.5	76.3	36.4	47.5	61.4	0.73	0.47	1.24	0.47	-0.2981	0	0	0.1133	0.115	0	0	0	0	1.02	0.1136	0	2.48	1.516
Tb927.10.7980	hypothetical protein, conserved	ZUnknown	1	1519	101	43.2	42.6	77.9	57.2	58.3	43.3	0.76	0.73	1.8	0.73	0.1331	0	0	0.2364	0.00348	1	0	0	0	1.05	-0.2378	0	2.48	1.6915
Tb927.11.3540	hypothetical protein, conserved	ZUnknown	1	1186	139	46.8	37.9	82	64.5	45	41.9	0.73	0.84	1.96	0.73	0.2347	0	0	-0.0709	0.462	0	0	0	0	1.05	-0.3101	0	2.48	1.7485
Tb927.9.7210	mitochondrial exoribonuclease DSS-1	Mito.RNA	1			36.3	28.7	103.1	50.6	46.3	60.3	0.72	0.62	1.71	0.62	0.0238	0	0	-0.0782	0.283	0	0	0	0	#N/A	-0.1206	0	2.48	1.4542
Tb927.11.15720	hypothetical protein	ZUnknown	1		139	55.4	61.3	143.8	47.9	26.1	31.3	1.16	2.35	4.59	1.16	1.433	0	0	-0.0758	0.47	0	0	0	0	0.96	0.4508	0	2.48	1.406
Tb927.11.14760	Clustered mitochondria/Translation initiation factor eIF3 subunit 135, putative	ZUnknown	1			58.3	38.7	104.9	67.5	58.5	59.2	0.86	0.66	1.77	0.66	0.1331	0	0	0.0225	0.79	0	0	0	0	#N/A	-0.3152	0	2.48	1.4383
Tb927.7.7270	hypothetical protein, conserved	Cytoskeleton	1	2997	490	84.7	88	124.8	66.6	63.8	94.5	1.27	1.38	1.32	1.27	0.4042	0	0	-0.0749	0.242	0	0	0	0	1.11	0.5221	0	2.47	1.4276
Tb927.11.5720	hypothetical protein, conserved	ZUnknown	1	2904	1363	151.4	129.2	112.8	125.2	72.4	46.6	1.21	1.78	2.42	1.21	0.8507	0	0	1.0023	2.99e-35	1	0	1	0	0.98	-0.0348	0	2.47	1.4854
Tb927.11.12580	hypothetical protein, conserved	ZUnknown	1	2328	1038	68.4	68.5	196.1	57.7	83.4	127.6	1.19	0.82	1.54	0.82	0.2429	0	0	0.024	0.769	0	0	0	0	1.07	0.2185	0	2.47	1.3951
Tb927.8.1800	Eukaryotic membrane protein family, putative	ZUnknown	1	1969	423	44.3	46.4	99.1	37.7	43.6	50.8	1.18	1.06	1.95	1.06	0.482	0	0	0.0719	0.423	0	0	0	0	1.35	-0.0733	0	2.47	1.4383
Tb927.9.7580	hypothetical protein, conserved	ZUnknown	1.06	1944	143	104.7	156.1	117.3	103	89.4	63.8	1.02	1.75	1.84	1.02	0.6198	0	0	-0.4115	7.76e-11	1	0	0	0	1.14	-0.2596	0	2.47	1.516
Tb927.10.4730	ribonuclease HII, putative	DNA	1.5	1629	80	62.7	46.9	66.2	63.6	54.2	34.2	0.99	0.87	1.94	0.87	0.341	0	0	-0.0409	0.689	0	0	0	0	0.99	-0.0511	0	2.47	1.4594
Tb927.11.2440	TBCCD1, bilobe, centrioles, cell body anterior	Cytoskeleton	1			86.3	64.1	136.8	51.5	40.5	59.4	1.68	1.58	2.3	1.58	0.8901	0	0	0.2095	0.00171	1	0	0	0	#N/A	-0.3037	0	2.47	1.4005
Tb927.10.13680	lipase domain protein, putative,hypothetical protein	Lipids	1.8			67.2	38.8	137.1	97.1	56.8	81.4	0.69	0.68	1.68	0.68	0.0238	0	0	0.2405	0.000375	1	0	0	0	#N/A	-0.2042	0	2.47	1.5008
Tb927.11.11950	cytochrome oxidase assembly protein, putative	Mito.e.transport	1			15.1	11.5	38.2	16	16	16.6	0.94	0.72	2.3	0.72	0.4005	0	0	0.2341	0.0334	1	0	0	0	#N/A	-0.1764	0	2.47	1.6229
Tb927.10.6090	tRNA pseudouridine synthase A, putative	rRNA.tRNA.process	1.89			79.5	79.2	128.7	67.7	65.2	70.8	1.17	1.21	1.82	1.17	0.4854	0	0	0.0281	0.722	0	0	0	0	#N/A	-0.4756	0	2.47	1.585
Tb927.10.12160	hypothetical protein, conserved	ZUnknown	1			38.3	50.1	113.9	50.1	29.1	25.1	0.76	1.72	4.54	0.76	1.2265	0	0	0.1518	0.112	0	0	0	0	#N/A	0.2422	0	2.47	1.7225
Tb927.7.6630	KKIP5 Kinetochore interacting protein 5	Cell.cycle	1	5401	2016	87.8	53.2	245.3	58.5	65.3	115.5	1.5	0.81	2.12	0.81	0.5623	0	0	0.2812	7.94e-07	1	0	0	0	1.06	0.0701	0	2.46	1.3896
Tb927.8.7820	hypothetical protein, conserved, Cold-shock DNA-binding domain.	ZUnknown	1	5051	3134	50.4	73	559	37.7	42.1	64.2	1.34	1.73	8.71	1.34	1.9733	0	0	-0.662	2.57e-15	1	0	0	1	1.01	1.9164	0	2.46	1.5945
Tb927.9.8040	hypothetical protein, conserved	ZUnknown	1	3966	297	26.5	14.2	124.1	35.5	34.2	71.1	0.75	0.42	1.75	0.42	-0.039	0	0	0.1594	0.0156	1	0	0	0	1.14	-0.146	0	2.46	1.5993
Tb927.11.13320	hypothetical protein, conserved	ZUnknown	1	2432	237	55.5	39.5	115.1	54.1	56.1	71.1	1.03	0.7	1.62	0.7	0.1592	0	0	0.2896	0.000143	1	0	0	0	1.24	-0.2314	0	2.46	1.6599
Tb927.10.9610	hypothetical protein	ZUnknown	1	2405	1860	27.9	23.2	209.2	35.2	17.3	24.2	0.79	1.34	8.64	0.79	1.844	0	0	0.3515	7.51e-06	1	0	0	0	1.08	0.4934	0	2.46	1.4005
Tb927.11.4220	palmitoyl acyltransferase 6, putative	Lipids	1	2092	739	87	115.9	88.8	67.6	38.8	42.8	1.29	2.99	2.07	1.29	1.0818	0	0	-0.0468	0.618	0	0	0	0	1.3	0.0968	0	2.46	1.433
Tb927.10.11000	4EIP2 homologue	Translation	1	1444	415	58.7	50.1	74.6	65	46.8	40.5	0.9	1.07	1.84	0.9	0.3448	0	0	0.2405	0.00208	1	0	0	0	0.95	-0.3195	0	2.46	1.4906
Tb927.5.2790	mitochondrial DNA polymerase beta-PAK (Pol beta-PAK)	Mito.DNA	1.34			52.1	42.5	204.4	35.6	69.1	130.7	1.46	0.62	1.56	0.62	0.279	0	0	-0.3173	1.19e-09	1	0	0	0	#N/A	-0.4511	0	2.46	1.4168
Tb927.8.2500	ribosomal RNA methyltransferase, putative	rRNA.tRNA.process	1			9.1	9.6	29.3	15.8	16	16	0.58	0.6	1.83	0.58	0.0048	0	0	0.3064	0.00142	1	0	0	0	#N/A	-0.279	0	2.46	1.6826
Tb927.5.2330	hypothetical protein, conserved, armadillo repeat, weak PI3/4 kinase domain	ZUnknown	1			81.2	46.7	638.9	173.5	185.8	472.4	0.47	0.25	1.35	0.25	-0.5353	0	0	-0.0533	0.21	0	0	0	0	#N/A	0.0499	0	2.46	1.3448
Tb927.7.7200	hypothetical protein, conserved	ZUnknown	1.04	7700	502	41.9	42.8	328.7	84	131	210.5	0.5	0.33	1.56	0.33	-0.328	0	0	-0.0508	0.328	0	0	0	0	1.07	-0.443	0	2.45	1.4383
Tb927.8.3290	DNA polymerase zeta catalytic subunit, putative	DNA	1	6181	207	90.2	84.3	358.9	142.9	149.4	237.2	0.63	0.56	1.51	0.56	-0.152	0	0	0.0228	0.676	0	0	0	0	1.09	-0.2085	0	2.45	1.4436
Tb927.8.2160	multidrug resistance protein A,p-glycoprotein (PGPA)	Transporter	1	5570	630	96	71.2	492.6	162.6	133	237.2	0.59	0.54	2.08	0.54	0.0976	0	0	0.4081	5.44e-22	1	0	0	0	1.44	0.6384	0	2.45	1.5509
Tb927.6.1120	hypothetical protein, conserved	ZUnknown	1	2741	475	43.3	27.8	118.4	45.2	47.3	67	0.96	0.59	1.77	0.59	0.1462	0	0	0.0654	0.356	0	0	0	0	1.15	-0.5198	0	2.45	1.5898
Tb927.6.2570	hypothetical protein, conserved	ZUnknown	1	1697	183	60.8	70.5	106.7	50.1	50.2	57.3	1.21	1.4	1.86	1.21	0.5753	0	0	0.031	0.711	0	0	0	0	0.92	-0.2359	0	2.45	1.4276
Tb927.4.740	Rgp1, putative	ZUnknown	1	1663	167	143.8	127	147	118.1	110.2	109.9	1.22	1.15	1.34	1.15	0.3065	0	0	-0.3655	8.15e-10	1	0	0	0	1.02	-0.0836	0	2.45	1.373
Tb927.6.4940	RF-1 domain containing protein, putative	ZUnknown	1	1460	47	48.9	31.4	132	36	43.2	80.6	1.36	0.73	1.64	0.73	0.3142	0	0	0.0077	0.934	0	0	0	0	1.01	-0.1402	0	2.45	1.511
Tb927.10.9950	hypothetical protein, conserved	ZUnknown	1	1392	95	48.8	39.6	64.3	57.9	51.9	54.7	0.84	0.76	1.18	0.76	-0.1099	0	0	0.0681	0.43	0	0	0	0	1.1	-0.1366	0	2.45	1.3785
Tb927.8.3580	mitochondrial chaperone BCS1, putative	Chaperone	1			28.1	19.5	92.5	32.7	45.9	48.7	0.86	0.42	1.9	0.42	0.0841	0	0	0.1039	0.249	0	0	0	0	#N/A	-0.4202	0	2.45	1.5509
Tb927.7.7120	kinesin	Cytoskeleton	1.04			89.2	77.7	332.4	70.1	70.8	93.1	1.27	1.1	3.57	1.1	0.9855	0	0	-0.093	0.153	0	0	0	0	#N/A	0.0132	0	2.45	1.4436
Tb927.10.6540	kinetoplastid-specific phospho-protein phosphatase, putative	Protein.phosphatase	1.88			26	16.2	162	28.5	21.3	53.7	0.91	0.76	3.02	0.76	0.6446	0	0	0.3228	7.91e-07	1	0	0	0	#N/A	0.3814	0	2.45	1.5705
Tb927.11.1550	XRNF	RNA.degradation	1			27	13.6	44.3	39.8	23.4	30.8	0.68	0.58	1.44	0.58	-0.152	0	0	0.123	0.131	0	0	0	0	#N/A	-0.105	0	2.45	1.6554
Tb927.1.1640	hypothetical protein, conserved	ZUnknown	1.95			45.2	46.1	100	33.4	30.6	39.5	1.35	1.51	2.53	1.35	0.8453	0	0	-0.1322	0.146	0	0	0	0	#N/A	-0.168	0	2.45	1.3896
Tb927.11.6770	hypothetical protein, conserved	ZUnknown	1			50.8	30.3	104.9	67.3	43.5	67.2	0.75	0.7	1.56	0.7	0.0048	0	0	0.0079	0.922	0	0	0	0	#N/A	-0.1947	0	2.45	1.4436
Tb927.5.3880	hypothetical protein, conserved	ZUnknown	1			49	28.9	163	40.8	41.6	96.7	1.2	0.69	1.69	0.69	0.255	0	0	0.0279	0.713	0	0	0	0	#N/A	-0.3517	0	2.45	1.5008
Tb927.11.16120	hypothetical protein, conserved	ZUnknown	1			39.8	25.6	115.1	38.2	41.1	54.1	1.04	0.62	2.13	0.62	0.3372	0	0	-0.1508	0.0461	1	0	0	0	#N/A	-0.2173	0	2.45	1.541
Tb927.1.2120	calpain, putative,cysteine peptidase, Clan CA, family C2, putative	Protease	1	5421	2921	85.6	111.3	426	95	121.8	166.9	0.9	0.91	2.55	0.9	0.5394	0	0	-0.5295	1.01e-22	1	0	0	0	1.2	-0.2145	0	2.44	1.3277
Tb927.9.2030	AAA ATPase domain containing protein, putative	ZUnknown	1	3085	771	41.7	32.2	100.1	33.3	31.2	48	1.25	1.03	2.09	1.03	0.5427	0	0	-0.0502	0.585	0	0	0	0	1.29	-0.2207	0	2.44	1.6041
Tb927.3.1860	ATP-grasp domain containing protein, putative	ZUnknown	1	2861	529	47.5	58.9	107.9	49	49	60.9	0.97	1.2	1.77	0.97	0.3932	0	0	0.0058	0.942	0	0	0	0	0.96	-0.0596	0	2.44	1.5558
Tb927.11.10670	glycosyl hydrolase, putative	Glycans	1			57.8	29	163.7	81.4	61.9	96.3	0.71	0.47	1.7	0.47	-0.0589	0	0	0.1658	0.00593	1	0	0	0	#N/A	-0.0912	0	2.44	1.4647
Tb927.10.15970	sphingomyelin/ceramide phosphorylethanolamine synthase, bifunctional	Lipids	1.63			8.1	4.8	77.4	11.9	12.4	36.4	0.68	0.39	2.13	0.39	0.0931	0	0	0.0424	0.677	0	0	0	0	#N/A	-0.3731	0	2.44	1.6508
Tb927.2.4560	TBC-D2 likely GAP	Signalling	1			68	49	116.3	38.4	28.8	52.4	1.77	1.7	2.22	1.7	0.9235	0	0	-0.3503	4.33e-05	1	0	0	0	#N/A	-0.155	0	2.44	1.585
Tb927.7.7340	hypothetical protein, conserved	ZUnknown	1			35	42.9	74.6	31.7	48.7	48.1	1.1	0.88	1.55	0.88	0.2347	0	0	0.1553	0.0607	0	0	0	0	#N/A	-0.029	0	2.44	1.4803
Tb927.6.1130	hypothetical protein, conserved	ZUnknown	1			21.6	18.9	44.9	41.9	35.4	35.9	0.52	0.53	1.25	0.52	-0.3833	0	0	0.1186	0.189	0	0	0	0	#N/A	-0.1822	0	2.44	1.5008
Tb927.4.1030	Protein of unknown function (DUF501), putative	ZUnknown	1			15.3	9.3	43.4	21.8	16.4	16.4	0.7	0.57	2.65	0.57	0.3859	0	0	0.0615	0.657	0	0	0	0	#N/A	-0.0965	0	2.44	1.5607
Tb927.10.9200	Nuclease-related domain containing protein, putative	ZUnknown	1	5638	334	81.1	35.9	55.8	106	41	36	0.77	0.88	1.55	0.77	0.0931	0	0	-0.0836	0.385	0	0	0	0	1.16	-0.0544	0	2.43	1.5656
Tb927.3.3740	Zinc-finger double-stranded RNA-binding, putative	ZUnknown	1	3459	1455	35.3	47.7	107.8	29.1	25.8	48.2	1.21	1.85	2.24	1.21	0.821	0	0	-0.2458	0.000845	1	0	0	0	1.01	-0.0868	0	2.43	1.3618
Tb927.10.1120	hypothetical protein, conserved	ZUnknown	1.27	2503	573	94.3	84.8	203.2	35	55	89	2.69	1.54	2.28	1.54	1.1177	0	0	0.1504	0.0333	1	0	0	0	1.18	0.6988	0	2.43	1.4222
Tb927.10.7100	delta-4 fatty acid desaturase	Lipids	2.01	1784	397	244.1	350	143.8	168.1	73.9	41.4	1.45	4.74	3.47	1.45	1.6871	0	0	0.0492	0.623	0	0	0	0	1.27	0.1275	0	2.43	1.406
Tb927.7.2610	hypothetical protein, conserved	ZUnknown	1	1521	249	31.3	127.3	160.7	17.5	31.7	33	1.79	4.02	4.87	1.79	1.8319	0	0	-0.1447	0.132	0	0	0	0	0.85	0.2928	0	2.43	1.541
Tb927.10.13220	cyclophilin type peptidyl-prolyl cis-trans isomerase, putative (PPIase)	Chaperone	1.07			46.9	21.3	131.8	61	39.7	77.7	0.77	0.54	1.7	0.54	0.0048	0	0	0.1714	0.00396	1	0	0	0	#N/A	-0.2451	0	2.43	1.511
Tb927.9.10550	SAS6 centriole cartwheel protein	Cytoskeleton	1			85.3	51	93.6	55.8	51.6	77.4	1.53	0.99	1.21	0.99	0.3142	0	0	-0.1525	0.0162	1	0	0	0	#N/A	-0.3524	0	2.43	1.384
Tb927.11.8010	DNA repair protein, putative	DNA	1			91.3	51.2	190.6	65	44.4	81.4	1.4	1.15	2.34	1.15	0.7049	0	0	0.1066	0.175	0	0	0	0	#N/A	-0.0151	0	2.43	1.4005
Tb927.10.15550	hypothetical protein, conserved	ZUnknown	1			45.7	39	207.4	44.4	89.4	163.7	1.03	0.44	1.27	0.44	-0.1308	0	0	-0.0991	0.0579	0	0	0	0	#N/A	-0.2512	0	2.43	1.3896
Tb927.10.2480	hypothetical protein, conserved	ZUnknown	1.35			139.4	57.6	252.9	126.4	90.7	146.3	1.1	0.64	1.73	0.64	0.21	0	0	0.0411	0.577	0	0	0	0	#N/A	-0.4238	0	2.43	1.4647
Tb927.8.5310	Polyketide cyclase / dehydrase and lipid transport, putative	ZUnknown	1			57	37.6	73.1	51.7	45.9	51.1	1.1	0.82	1.43	0.82	0.1592	0	0	0.0094	0.925	0	0	0	0	#N/A	-0.2607	0	2.43	1.4699
Tb927.10.5190	Kinesin associated protein, putative	ZUnknown	1.93	3912	2638	96.3	99.4	123.5	54.4	44	30.1	1.77	2.26	4.1	1.77	1.4383	0	0	0.3412	6.17e-05	1	0	0	0	1.29	3.381	0	2.42	1.3391
Tb927.3.3050	hypothetical protein, conserved	ZUnknown	1.46	3222	178	57	31.1	135	57.6	46.4	51.7	0.99	0.67	2.61	0.67	0.5093	0	0	0.0449	0.554	0	0	0	0	1.04	-0.2496	0	2.42	1.4594
Tb927.4.2680	Zeta toxin, putative	ZUnknown	1	2977	734	153.9	159.6	426.4	120.9	70.9	99.4	1.27	2.25	4.29	1.27	1.3804	0	0	-0.576	4.06e-25	1	0	0	0	1	-0.3089	0	2.42	1.3448
Tb927.7.5250	hypothetical protein, conserved	ZUnknown	1	2937	669	91.4	86.4	162.8	59.7	53.5	84.1	1.53	1.61	1.94	1.53	0.7599	0	0	0.0041	0.959	0	0	0	0	1.05	-0.0133	0	2.42	1.3161
Tb927.10.11510	hypothetical protein, conserved	ZUnknown	1	2847	1082	83.5	152.6	149.8	46	54.1	62	1.82	2.82	2.42	1.82	1.2347	0	0	0.0036	0.969	0	0	0	0	0.94	-0.0499	0	2.42	1.3334
Tb927.6.2020	FG-GAP repeat protein, putative,intergrin alpha chain protein, putative	Cytoskeleton	1	2661	126	74.3	48.9	137.3	55.2	44.7	92	1.35	1.09	1.49	1.09	0.3896	0	0	-0.1164	0.0904	0	0	0	0	0.94	-0.0936	0	2.42	1.4168
Tb927.1.3840	hypothetical protein, conserved	ZUnknown	1	2102	261	40.3	32.7	89.6	53.4	56.4	55.1	0.75	0.58	1.63	0.58	-0.0194	0	0	0.1274	0.0988	0	0	0	0	1.06	-0.1426	0	2.42	1.5945
Tb927.5.3280	BBP135	Cytoskeleton	1			82.6	47.4	146.5	98.3	98.3	176.3	0.84	0.48	0.83	0.48	-0.4806	0	0	0.0811	0.166	0	0	0	0	#N/A	-0.257	0	2.42	1.4383
Tb927.6.2380	hypothetical protein, conserved	Mito.pathway	1			37.8	15.8	96.2	56.3	27.5	46.7	0.67	0.57	2.06	0.57	0.1375	0	0	0.0985	0.227	0	0	0	0	#N/A	-0.1169	0	2.42	1.5705
Tb927.11.9800	serine peptidase, Clan SP, family S59, putative Nucleoporin	Nuclear.transport	1			88.8	71.6	58	86.9	63	38.6	1.02	1.14	1.5	1.02	0.2869	0	0	0.2264	0.0213	1	0	0	0	#N/A	-0.199	0	2.42	1.433
Tb927.11.2740	MYND zinc finger	Zinc.finger	1			120.4	80.4	463.1	142.7	104.7	176.4	0.84	0.77	2.63	0.77	0.4991	0	0	-0.0526	0.389	0	0	0	0	#N/A	-0.0835	0	2.42	1.4854
Tb927.10.3920	Some resemblance to a protein of the dense fiber of sperm tails	ZUnknown	2.02			124.1	135.4	312.4	69.5	79.4	102.6	1.79	1.71	3.04	1.71	1.1243	0	0	-0.4186	1.63e-11	1	0	0	0	#N/A	0.9414	0	2.42	1.384
Tb927.10.2150	Protein of unknown function, DUF607, putative	ZUnknown	1.01			40.8	73.5	54.8	47.5	43.3	22.8	0.86	1.7	2.4	0.86	0.7254	0	0	0.2232	0.0286	1	0	0	0	#N/A	-0.3807	0	2.42	1.511
Tb927.11.3920	hypothetical protein, conserved	ZUnknown	1	3053	660	170.8	204.9	564.7	90	83.3	135.5	1.9	2.46	4.17	1.9	1.5076	0	0	0.0603	0.318	0	0	0	0	1.06	-0.4571	0	2.41	1.4957
Tb927.7.4050	hypothetical protein, conserved	ZUnknown	1	2535	71	75.1	80.3	169.5	84.1	87.1	92.8	0.89	0.92	1.83	0.89	0.279	0	0	0.1864	0.00231	1	0	0	0	1.03	-0.0993	0	2.41	1.373
Tb927.5.2430	membrane transporter protein, putative	Transporter	1	2201	467	411.4	272.3	356.4	434.2	248.2	267.2	0.95	1.1	1.33	0.95	0.1721	0	0	0.0081	0.899	0	0	0	0	0.95	-0.1076	0	2.41	1.4005
Tb927.11.3420	leucine-rich repeat protein (LRRP)	LRRP	1	1934	220	30.4	23.4	74.4	32.6	44.2	52.5	0.93	0.53	1.42	0.53	-0.0589	0	0	-0.026	0.767	0	0	0	0	1.07	-0.2994	0	2.41	1.4803
Tb927.11.400	Protein of unknown function (DUF1308), putative	ZUnknown	1	1889	110	23.4	22.3	76.7	30.2	45.2	59.2	0.77	0.49	1.3	0.49	-0.2288	0	0	0.1012	0.224	0	0	0	0	0.92	-0.1224	0	2.41	1.4647
Tb927.8.3200	AVO3 (TOR signalling)	Signalling	1			77.1	58.1	340.5	83.4	78.4	190.3	0.92	0.74	1.79	0.74	0.2016	0	0	-0.1402	0.00571	1	0	0	0	#N/A	-0.1796	0	2.41	1.3951
Tb927.1.4300	chaperone DNAj, putative, J17	Chaperone	1	4558	2748	53.6	57.5	136.9	33.3	31.7	41.4	1.61	1.81	3.31	1.61	1.1656	0	0	0.4183	1.23e-12	1	0	0	0	1.46	-0.3145	0	2.4	1.3505
Tb927.8.8130	hypothetical protein, conserved	ZUnknown	1	4465	1982	93.8	118.9	514.3	56.9	61.3	70.8	1.65	1.94	7.26	1.65	1.8547	0	0	-0.5689	7.09e-21	1	0	0	0	1.1	-0.444	0	2.4	1.546
Tb927.11.10150	Enoyl-CoA hydratase/isomerase family, putative	Mito.translation	1	4003	56	43.9	27.7	194.8	67.7	93.7	142.9	0.65	0.3	1.36	0.3	-0.3771	0	0	0.3671	1.01e-14	1	0	0	0	1.03	-0.1978	0	2.4	1.4222
Tb927.10.3400	hypothetical protein, conserved	ZUnknown	1.3	3662	898	73.3	25.9	184.2	46.9	19	44.2	1.56	1.36	4.17	1.36	1.2408	0	0	-0.4576	4.95e-17	1	0	0	0	1.18	0.0211	0	2.4	1.5008
Tb927.7.3280	IF2 translation initiation factor IF-2, putative	Translation	1	3019	597	19.3	10.7	141.4	22.6	32.6	90.1	0.85	0.33	1.57	0.33	-0.1255	0	0	0.1834	0.00598	1	0	0	0	1.18	-0.0418	0	2.4	1.6041
Tb927.10.12740	ZC3H35	RNA.binding	1.01	2941	1322	96.5	140.3	116.9	71.5	66.1	51.7	1.35	2.12	2.26	1.35	0.9336	0	0	0.1496	0.0474	1	0	0	0	1.16	0.3621	0	2.4	1.3785
Tb927.1.4250	hypothetical protein, conserved	ZUnknown	1	2851	478	60.6	36.8	151.8	35.1	33.8	54.5	1.73	1.09	2.79	1.09	0.903	0	0	-0.0803	0.273	0	0	0	0	1.03	-0.2874	0	2.4	1.4436
Tb927.6.1980	LMBR1-like membrane protein, putative	ZUnknown	1	2748	528	260.2	300.9	403.3	262.7	139.7	165.1	0.99	2.15	2.44	0.99	0.8953	0	0	0.0545	0.404	0	0	0	0	1.13	-0.1607	0	2.4	1.3448
Tb927.11.3020	hypothetical protein, conserved	ZUnknown	1	2422	148	172.8	102.3	168.6	138.7	79.9	93.4	1.25	1.28	1.81	1.25	0.5327	0	0	0.0456	0.534	0	0	0	0	0.95	-0.3494	0	2.4	1.4699
Tb927.7.3340	Putative S-adenosyl-L-methionine-dependent methyltransferase, putative	ZUnknown	1	2413	631	34.5	22.8	91.9	38.9	36.7	40.3	0.89	0.62	2.28	0.62	0.3372	0	0	0.0952	0.245	0	0	0	0	1.01	-0.2205	0	2.4	1.7004
Tb927.9.8240	hypothetical protein, conserved, no good matches	ZUnknown	1	2120	594	59.8	50.1	83.6	37.9	30.5	41.1	1.58	1.64	2.03	1.58	0.8074	0	0	0.161	0.0539	0	0	0	0	1.27	0.7478	0	2.4	1.4542
Tb927.6.1180	Basal body protein, similar to human non-muscle myosin	Cytoskeleton	1			32.8	19.6	83.1	43.7	74.8	124	0.75	0.26	0.67	0.26	-0.8365	0	0	-0.1194	0.0779	0	0	0	0	#N/A	0.0173	0	2.4	1.3448
Tb927.2.2210	hypothetical protein, conserved	Mito.pathway	1			37.8	24.4	133.3	61.7	65.9	110.5	0.61	0.37	1.21	0.37	-0.454	0	0	-0.2278	5.06e-05	1	0	0	0	#N/A	-0.0204	0	2.4	1.3896
Tb927.5.1720	hypothetical protein, conserved	ZUnknown	1			132.4	154	370.5	84	96	127.6	1.58	1.6	2.9	1.58	1.0191	0	0	-0.0856	0.155	0	0	0	0	#N/A	-0.177	0	2.4	1.4168
Tb927.10.12140	hypothetical protein, conserved	ZUnknown	1			47	28.1	126.9	51.8	53.9	81.6	0.91	0.52	1.56	0.52	-0.0048	0	0	0.0941	0.205	0	0	0	0	#N/A	-0.1986	0	2.4	1.4803
Tb927.10.9350	hypothetical protein, conserved	ZUnknown	1			55.7	39.7	221.3	77.2	51.1	92.1	0.72	0.78	2.4	0.72	0.3785	0	0	-0.1139	0.0933	0	0	0	0	#N/A	0.3574	0	2.4	1.4906
Tb927.11.14850	hypothetical protein, conserved	ZUnknown	1			62.9	66.7	179.3	42.5	36.4	55.7	1.48	1.83	3.22	1.48	1.1221	0	0	-0.1317	0.0751	0	0	0	0	#N/A	-0.4588	0	2.4	1.4906
Tb927.8.3700	hypothetical protein, conserved	ZUnknown	1	5685	1013	50.4	21.8	230.4	75.2	59.3	149.3	0.67	0.37	1.54	0.37	-0.2176	0	0	-0.2612	2.32e-07	1	0	0	0	0.98	-0.3012	0	2.39	1.3448
Tb927.7.480	hypothetical protein, conserved	ZUnknown	1	4036	1110	225.4	163.4	385	192.9	124.3	191.2	1.17	1.31	2.01	1.17	0.5818	0	0	0.1612	0.00147	1	0	0	0	1.89	0.2606	0	2.39	1.4222
Tb927.11.10190	telomerase reverse transcriptase, putative	DNA	1	4001	327	72.4	120.6	284.1	127.4	111.9	148.1	0.57	1.08	1.92	0.57	0.251	0	0	-0.0127	0.853	0	0	0	0	1.05	-0.1798	0	2.39	1.3951
Tb927.7.6940	glutaminyl cyclase, putative	Amino.acids	1	2957	472	101.9	102.3	122.2	79.4	110.8	127.2	1.28	0.92	0.96	0.92	0.075	0	0	-0.2846	9.43e-06	1	0	0	0	1.27	-0.1199	0	2.39	1.4276
Tb927.10.5320	RNA editing endoribonuclease (KREN3)	Mito.RNA	2.05	2694	705	56.4	47.4	135.2	40.2	55.7	76.8	1.4	0.85	1.76	0.85	0.4186	0	0	0.0471	0.543	0	0	0	0	1.03	-0.3051	0	2.39	1.3561
Tb927.7.290	leucine-rich repeat protein (LRRP)	LRRP	1.08	2664	1007	95	157.5	331.3	73	42.5	62.1	1.3	3.71	5.33	1.3	1.7852	0	0	-0.0208	0.796	0	0	0	0	1.08	-0.2597	0	2.39	1.406
Tb927.8.7440	lipase, putative	Lipids	1	2539	515	199.4	239.9	146.5	158.4	181.9	147.8	1.26	1.32	0.99	0.99	0.251	0	0	0.83	1.01e-42	1	0	1	0	1.04	-0.241	0	2.39	1.3219
Tb927.11.6580	hypothetical protein, conserved	ZUnknown	1.8	2369	79	58.8	38.4	128.8	53	64.7	55.3	1.11	0.59	2.33	0.59	0.4258	0	0	0.03	0.741	0	0	0	0	1.08	-0.2882	0	2.39	1.516
Tb927.1.1230	chaperone DNAj, putative, J47	Chaperone	1.06	2214	734	61.7	69.7	89.4	37.1	33.9	32.6	1.66	2.06	2.74	1.66	1.1066	0	0	-0.1435	0.114	0	0	0	0	0.91	-0.221	0	2.39	1.669
Tb927.11.15620	hypothetical protein, conserved	ZUnknown	1	2136	145	36.9	25.9	74.7	47.7	45.6	47.6	0.77	0.57	1.57	0.57	-0.0439	0	0	0.3196	2.06e-06	1	0	0	0	1.08	-0.2212	0	2.39	1.4594
Tb927.4.2790	hypothetical protein, conserved	ZUnknown	1	1945	183	39.9	30.5	96.8	42.5	40.8	60.8	0.94	0.75	1.59	0.75	0.1287	0	0	-0.253	0.000536	1	0	0	0	1.04	-0.2442	0	2.39	1.4276
Tb927.7.5620	SET domain containing protein, putative	ZUnknown	2.06	1481	168	48.4	39.1	90.7	38.5	28.9	31.4	1.26	1.35	2.89	1.26	0.8745	0	0	-0.3723	9.78e-06	1	0	0	0	0.81	-0.1982	0	2.39	1.541
Tb927.11.6850	Optic atrophy 3 protein (OPA3), putative	ZUnknown	1	1125	225	20.8	33.5	33.3	46.6	43.1	28.5	0.45	0.78	1.17	0.45	-0.3219	0	0	-0.106	0.36	0	0	0	0	0.85	-0.1985	0	2.39	1.4276
Tb927.4.1990	RNA helicase, SUV3 homologue, putative,in mitochondrion	Mito.RNA	1			24.3	10.2	95.5	32.5	27.4	66.2	0.75	0.37	1.44	0.37	-0.2288	0	0	-0.0741	0.265	0	0	0	0	#N/A	-0.0166	0	2.39	1.3277
Tb927.10.1330	hypothetical protein, conserved	ZUnknown	1			20.6	16.7	44.3	40	49.6	46.6	0.52	0.34	0.95	0.34	-0.729	0	0	-0.027	0.764	0	0	0	0	#N/A	-0.2111	0	2.39	1.3561
Tb927.1.4050	ser/thr protein phosphatase with EF-Hand domains (PPEF)	Protein.phosphatase	1	5255	2358	88.7	46.3	291.6	104.9	140.8	195.2	0.85	0.33	1.49	0.33	-0.1681	0	0	-0.2744	3.05e-09	1	0	0	0	1.19	-0.2509	0	2.38	1.263
Tb927.11.16010	hypothetical protein, conserved	ZUnknown	1	4513	664	115.8	53.7	252.2	227.1	213.2	276.1	0.51	0.25	0.91	0.25	-0.8451	0	0	0.0302	0.596	0	0	0	0	1.18	-0.2457	0	2.38	1.4276
Tb927.10.2570	lysosomal alpha-mannosidase precursor, putative	Glycans	1.62	3686	681	340.2	145	443.6	393	247	418.4	0.87	0.59	1.06	0.59	-0.2515	0	0	0.4884	2.51e-22	1	0	0	0	1.1	-0.1366	0	2.38	1.4699
Tb927.10.5530	hypothetical protein, conserved	ZUnknown	1	2697	530	82.1	39.8	122.7	68.6	34.4	59.1	1.2	1.16	2.08	1.16	0.5656	0	0	-0.1201	0.101	0	0	0	0	1.05	-0.263	0	2.38	1.3448
Tb927.10.15600	FKBP-type peptidyl-prolyl cis-trans isomerase, conserved	Chaperone	1	1923	908	53.9	42	45.3	44.1	37.9	32.6	1.22	1.11	1.39	1.11	0.3103	0	0	0.3653	0.00021	1	0	0	0	1.13	-0.2079	0	2.38	1.4751
Tb927.9.10440	DNA polymerase epsilon catalytic subunit, putative	DNA	1			128.5	49.5	372.8	249.6	140.5	353.9	0.51	0.35	1.05	0.35	-0.6514	0	0	0.0031	0.959	0	0	0	0	#N/A	-0.0368	0	2.38	1.2928
Tb927.10.16090	Mitochondrial SSU ribosomal protein, putative	Mito.translation	1.79			52.1	47.5	102.1	60.6	81.5	71.3	0.86	0.58	1.43	0.58	-0.0639	0	0	0.2356	0.000183	1	0	0	0	#N/A	-0.1388	0	2.38	1.406
Tb927.7.5850	hypothetical protein, conserved	ZUnknown	1			108.3	188.2	284.3	70.8	74.2	68.2	1.53	2.54	4.17	1.53	1.4577	0	0	0.0264	0.726	0	0	0	0	#N/A	-0.6384	1	2.38	1.3448
Tb927.7.6750	hypothetical protein, conserved	ZUnknown	1			40.2	31.2	131.6	38.9	67.6	101.6	1.03	0.46	1.3	0.46	-0.1047	0	0	-0.0065	0.943	0	0	0	0	#N/A	-0.3361	0	2.38	1.511
Tb927.8.7750	hypothetical protein, conserved	ZUnknown	1	4429	1013	50.4	30.4	211.6	83.3	62.8	183.5	0.61	0.48	1.15	0.48	-0.4215	0	0	-0.5679	6.49e-20	1	0	0	0	1.1	-0.3325	0	2.37	1.3674
Tb927.7.3150	CRAL/TRIO domain containing protein, putative	ZUnknown	1	3380	1505	45.4	47.1	161.7	30.3	22	30.5	1.5	2.14	5.3	1.5	1.5753	0	0	0.4868	3.9e-10	1	0	0	0	0.82	1.2501	0	2.37	1.3785
Tb927.11.14180	CLASP N terminal, putative	ZUnknown	1	3188	190	41.7	34.2	118.9	57	48.5	88.6	0.73	0.71	1.34	0.71	-0.1099	0	0	-0.1037	0.136	0	0	0	0	0.94	-0.1921	0	2.37	1.373
Tb927.11.10720	hypothetical protein, conserved	Mito.pathway	1	3092	105	62.6	44.2	213.4	100.2	84	179	0.62	0.53	1.19	0.53	-0.3585	0	0	0.1401	0.0215	1	0	0	0	1.1	-0.2067	0	2.37	1.373
Tb927.7.3010	Nitrogen permease regulator 2, putative	ZUnknown	1	2388	76	57.5	45.1	118.9	84.6	77.3	93	0.68	0.58	1.28	0.58	-0.2401	0	0	0.1175	0.101	0	0	0	0	1.17	-0.1438	0	2.37	1.3674
Tb927.1.2320	hypothetical protein, conserved	ZUnknown	1			127.8	247.1	92.6	68.5	54.9	41.7	1.87	4.5	2.22	1.87	1.5177	0	0	-1.0047	3.92e-20	1	0	0	1	#N/A	0.0702	0	2.37	1.3618
Tb927.11.6020	hypothetical protein, conserved	ZUnknown	1			100.5	202.9	76.7	68.5	52.3	32.4	1.47	3.88	2.37	1.47	1.3636	0	0	-0.5398	8.71e-07	1	0	0	0	#N/A	0.0957	0	2.37	1.3103
Tb927.11.15790	hypothetical protein, conserved	ZUnknown	1.48			72	77.1	150.8	60.3	80.4	82.6	1.19	0.96	1.83	0.96	0.4078	0	0	0.0771	0.306	0	0	0	0	#N/A	-0.3477	0	2.37	1.3505
Tb927.11.5630	hypothetical protein, conserved	ZUnknown	1			80.6	83.7	108.1	84.8	63.5	51	0.95	1.32	2.12	0.95	0.5493	0	0	0.1407	0.0693	0	0	0	0	#N/A	-0.1747	0	2.37	1.4803
Tb927.9.15350	hypothetical protein, conserved	ZUnknown	1.58			34	18.4	75.3	34.3	26.7	36.2	0.99	0.69	2.08	0.69	0.3258	0	0	0.108	0.232	0	0	0	0	#N/A	-0.2889	0	2.37	1.6415
Tb927.11.5060	RSM22	Mito.translation	1	3437	190	47.5	27.9	138.8	54.8	60.5	104.2	0.87	0.46	1.33	0.46	-0.1735	0	0	-0.4017	2.24e-14	1	0	0	0	1.1	-0.0651	0	2.36	1.4276
Tb927.8.3500	MMS19, Fe-S cluster biogenesis	Enzyme	2.46	3008	24	112	30.8	234.5	181	70.5	107.3	0.62	0.44	2.19	0.44	0.1155	0	0	-0.4576	7.81e-15	1	0	0	0	0.92	-0.1742	0	2.36	1.384
Tb927.8.7960	hypothetical protein	ZUnknown	1	2978	1538	104.2	136	208.5	66.2	45.6	38.6	1.57	2.98	5.4	1.57	1.7297	0	0	-1.1932	8.97e-52	1	0	0	1	1.25	0.3626	0	2.36	1.3618
Tb927.11.6040	Nodulin-like, putative	ZUnknown	1	2811	723	157.5	185.9	363.5	116.3	59.9	53.4	1.35	3.1	6.81	1.35	1.9082	0	0	0.3545	1.66e-05	1	0	0	0	1.23	0.1779	0	2.36	1.5509
Tb927.5.2030	hypothetical protein, conserved	ZUnknown	1	2513	1195	40.1	31.4	126.5	29.3	44.9	74.4	1.37	0.7	1.7	0.7	0.3296	0	0	0.462	4.43e-13	1	0	0	0	1.03	-0.1399	0	2.36	1.433
Tb927.4.3090	hypothetical protein, conserved	ZUnknown	1.88	1563	544	84.5	73	85.8	63.4	50.6	43.4	1.33	1.44	1.98	1.33	0.663	0	0	-0.6498	2.27e-08	1	0	0	1	0.97	-0.2704	0	2.36	1.4594
Tb927.5.3470	hypothetical protein, conserved	ZUnknown	1	1485	181	61.9	234.1	151.6	34.1	34.4	38.2	1.82	6.81	3.97	1.82	2.0704	0	0	0.394	2.81e-05	1	0	0	0	1.21	-0.2193	0	2.36	1.5059
Tb927.9.3970	alpha/beta-hydrolase-like protein	Enzyme	1.99	956	272	58.5	43.1	169.3	52	45.9	64.1	1.13	0.94	2.64	0.94	0.6508	0	0	-0.1108	0.189	0	0	0	0	1.28	0.0121	0	2.36	1.6182
Tb927.3.4030	hypothetical protein, conserved	Mito.pathway	1			27.9	23.9	179.6	59.6	87.4	138.8	0.47	0.27	1.29	0.27	-0.5635	0	0	-0.0063	0.933	0	0	0	0	#N/A	-0.2031	0	2.36	1.4647
Tb11.02.5390	mRNA processing protein, putative	Mito.RNA	1.96			59	45.1	229.1	86.9	77.5	125.9	0.68	0.58	1.82	0.58	0.038	0	0	-0.2737	6.38e-08	1	0	0	0	#N/A	-0.3072	0	2.36	1.3334
Tb927.10.15570	transcription factor IIa, putative (TFIIA-1)	RNA.synthesis	1.4			26.5	18.4	81.7	23.3	45.6	62.3	1.14	0.4	1.31	0.4	-0.074	0	0	-0.1032	0.187	0	0	0	0	#N/A	-0.1383	0	2.36	1.5801
Tb927.3.2730	hypothetical protein, trypanosoma specific	ZUnknown	1			51.7	32.4	231.9	84	81.3	163.5	0.62	0.4	1.42	0.4	-0.2981	0	0	-0.2419	4.06e-07	1	0	0	0	#N/A	-0.1199	0	2.36	1.406
Tb927.4.4140	hypothetical protein, conserved	ZUnknown	1.99			87.3	61.4	202.1	72.9	61.7	116.6	1.2	1	1.73	1	0.3896	0	0	-0.4309	6.37e-10	1	0	0	0	#N/A	-0.1869	0	2.36	1.5993
Tb927.10.10750	metallo-peptidase, Clan MC, Family M14, putative	Protease	1.18	6037	228	68.8	32	263.3	103.1	111.3	192.4	0.67	0.29	1.37	0.29	-0.3646	0	0	-0.0181	0.762	0	0	0	0	1.33	-0.1093	0	2.35	1.2928
Tb927.11.10810	PUF11	RNA.binding	1	5283	2722	119.7	136.2	814.7	155.6	126.3	144.2	0.77	1.08	5.65	0.77	1.3219	0	0	0.017	0.795	0	0	0	0	1.41	-0.133	0	2.35	1.269
Tb927.3.2630	hypothetical protein, conserved	ZUnknown	1	3321	927	54.5	41.4	147.5	68.6	72.1	86.4	0.79	0.57	1.71	0.57	0.0333	0	0	-0.1792	0.00514	1	0	0	0	0.92	-0.2022	0	2.35	1.3785
Tb927.10.6590	hypothetical protein, conserved	ZUnknown	1.34	3283	1021	71.4	59.8	247.8	78	62.6	86.9	0.92	0.96	2.85	0.92	0.6569	0	0	0.0524	0.477	0	0	0	0	1.18	-0.0308	0	2.35	1.5059
Tb927.8.1070	hypothetical protein, conserved, no domains	ZUnknown	1	2933	257	47.6	32	105.6	48.6	54	75.5	0.98	0.59	1.4	0.59	-0.0145	0	0	0.0924	0.255	0	0	0	0	1.26	-0.3066	0	2.35	1.3618
Tb927.7.250	ZC3H16	RNA.binding	1	2623	54	71.4	51.3	156.1	74.3	62	72	0.96	0.83	2.17	0.83	0.4005	0	0	0.0292	0.719	0	0	0	0	1.45	0.0448	0	2.35	1.546
Tb927.7.350	hypothetical protein	ZUnknown	1	2531	130	31.3	34.1	85.3	19.9	21.4	25.3	1.57	1.59	3.37	1.57	1.1221	0	0	0.5409	1.11e-08	1	0	0	0	0.94	-0.0543	0	2.35	1.4276
Tb927.10.9100	hypothetical protein, conserved	ZUnknown	1.93	2313	66	48.3	24.4	104.3	61.3	58.7	90.4	0.79	0.42	1.15	0.42	-0.3462	0	0	0.0133	0.873	0	0	0	0	1.17	0.0219	0	2.35	1.275
Tb927.10.3730	SET domain containing protein, putative	ZUnknown	1.28	2301	261	51.7	31.7	122.6	65.8	52.8	89.9	0.79	0.6	1.36	0.6	-0.1255	0	0	0.1508	0.0166	1	0	0	0	1.3	-0.1418	0	2.35	1.384
Tb927.9.10670	Bardet-Biedl syndrome 1 protein homolog (BBS1-like protein 1), putative	Cytoskeleton	1	1846	39	83.6	57.8	133	63.3	54.7	61.2	1.32	1.06	2.17	1.06	0.6009	0	0	0.0501	0.52	0	0	0	0	1.15	-0.2127	0	2.35	1.4751
Tb927.10.9300	adiponectin receptor protein 1	ZUnknown	1	1666	712	504.9	1212	475.9	270.8	102.3	80.2	1.86	11.85	5.93	1.86	2.7108	0	0	0.3031	5.84e-06	1	0	0	0	0.97	-0.1386	0	2.35	1.275
Tb927.11.4850	hypothetical protein, conserved	Mito.pathway	1	1501	137	31.5	33	86.5	45.5	57.4	67.3	0.69	0.57	1.29	0.57	-0.2345	0	0	0.1566	0.0264	1	0	0	0	0.9	-0.121	0	2.35	1.4957
Tb927.10.9420	mitochondrial chaperone BCS1, putative	Chaperone	1			69.2	47.8	95.5	60.4	77	80.7	1.15	0.62	1.18	0.62	-0.0242	0	0	0.0184	0.838	0	0	0	0	#N/A	-0.4179	0	2.35	1.3896
Tb927.2.1780	UDP-GlcNAc:PI a1-6 GlcNAc-transferase	Glycans	1.81			70.9	111.4	192.5	36.6	31.4	40	1.94	3.55	4.81	1.94	1.7796	0	0	0.1692	0.0581	0	0	0	0	#N/A	-0.0977	0	2.35	1.373
Tb927.4.2560	Cardolipin synthase	Lipids	1.91			32.6	32.5	100.8	32.1	38.7	59.6	1.02	0.84	1.69	0.84	0.2429	0	0	-0.1425	0.036	1	0	0	0	#N/A	-0.1862	0	2.35	1.433
Tb927.11.2010	hypothetical protein, possible component of cytochorome oxidase complex	Mito.e.transport	1			40.3	26.1	54.4	49.2	27.6	33	0.82	0.95	1.65	0.82	0.189	0	0	0.2548	0.00176	1	0	0	0	#N/A	-0.2054	0	2.35	1.4436
Tb927.10.1930	hypothetical protein, conserved	Mito.pathway	1.22			30.2	30.5	132.7	30.5	50.7	63.9	0.99	0.6	2.08	0.6	0.2908	0	0	0.2089	0.000813	1	0	0	0	#N/A	-0.1911	0	2.35	1.5705
Tb927.7.6680	protein kinase, putative	Protein.kinase	1			149.2	157	578.6	89.6	59.5	135.1	1.67	2.64	4.28	1.67	1.5177	0	0	0.3587	8.62e-10	1	0	0	0	#N/A	-0.0982	0	2.35	1.275
Tb927.3.5590	hypothetical protein, conserved	ZUnknown	1			78	51.6	96.1	92.6	63	58.3	0.84	0.82	1.65	0.82	0.1419	0	0	0.0947	0.203	0	0	0	0	#N/A	-0.1959	0	2.35	1.4436
Tb927.11.13540	hypothetical protein, conserved	ZUnknown	1			31.2	23.3	66.6	27.3	24.1	43.7	1.14	0.97	1.52	0.97	0.275	0	0	-0.0472	0.607	0	0	0	0	#N/A	-0.2304	0	2.35	1.4699
Tb927.7.3660	hypothetical protein, conserved	ZUnknown	1			35.1	49.3	117.9	20.8	30.5	29.3	1.69	1.62	4.02	1.62	1.2889	0	0	0.1032	0.258	0	0	0	0	#N/A	-0.3652	0	2.35	1.5059
Tb927.10.12550	hypothetical protein, conserved	ZUnknown	1			77.7	95	122.6	53.8	35.6	32.1	1.44	2.67	3.82	1.44	1.4024	0	0	0.1395	0.173	0	0	0	0	#N/A	-0.1261	0	2.35	1.6135
Tb927.3.3860	lipase, putative,triacylglycerol lipase, putative	Lipids	1.15	4155	380	85.8	50.9	263.3	127.9	117.5	169.1	0.67	0.43	1.56	0.43	-0.1735	0	0	0.214	3.69e-05	1	0	0	0	1.09	-0.2367	0	2.34	1.516
Tb927.8.6420	beta-ketoacyl-ACP reductase 2	Enzyme	1	1836	171	105.7	109.7	116.8	99.9	52.3	56.8	1.06	2.1	2.06	1.06	0.7991	0	0	-0.1614	0.0403	1	0	0	0	1.21	-0.1147	0	2.34	1.3618
Tb927.10.7220	hypothetical protein, conserved	ZUnknown	1	1744	312	52.2	127.6	110.6	57.6	34.3	29.9	0.91	3.72	3.7	0.91	1.4734	0	0	0.2824	0.00173	1	0	0	0	0.98	-0.2164	0	2.34	1.6088
Tb927.8.2040	Domain of unknown function (DUF1767), putative	ZUnknown	1	1741	973	9.1	6.2	31.1	11.4	12.1	18.6	0.8	0.51	1.67	0.51	-0.0097	0	0	0.1864	0.0702	0	0	0	0	1.06	-0.2674	0	2.34	1.5705
Tb927.11.3460	hypothetical protein, conserved	ZUnknown	1	1547	535	117.1	182.1	142	84.3	64.6	49.6	1.39	2.82	2.86	1.39	1.2367	0	0	0.0268	0.785	0	0	0	0	0.96	-0.3179	0	2.34	1.281
Tb927.9.3350	pseudouridylate synthase, putative	rRNA.tRNA.process	1	1378	149	84.1	59.7	66.4	71.9	84.5	63.6	1.17	0.71	1.04	0.71	-0.039	0	0	0.5304	4.79e-12	1	0	0	0	0.83	-0.1387	0	2.34	1.275
Tb927.11.5010	TFIIF-stimulated CTD phosphatase, putative	Protein.phosphatase	1			38.6	47.1	105.6	28.1	22.8	36.5	1.37	2.07	2.89	1.37	1.0772	0	0	0.0017	0.987	0	0	0	0	#N/A	-0.086	0	2.34	1.3951
Tb927.11.8000	hypothetical protein, conserved	ZUnknown	1			178.9	215.7	166.1	136.3	107.9	74.8	1.31	2	2.22	1.31	0.8823	0	0	0.2336	0.00131	1	0	0	0	#N/A	-0.1932	0	2.34	1.3561
Tb927.6.1810	Alpha/beta hydrolase family, putative	ZUnknown	1			126.4	84.8	247.4	85.5	43.7	56.2	1.48	1.94	4.4	1.48	1.3822	0	0	-0.3875	1.9e-07	1	0	0	0	#N/A	2.3005	0	2.34	1.4383
Tb927.7.7000	hook complex protein, conserved	Cytoskeleton	1.33	5439	362	63.1	56.9	387.6	79.2	82	214.2	0.8	0.69	1.81	0.69	0.1375	0	0	-0.1148	0.0163	1	0	0	0	1.27	0.2359	0	2.33	1.257
Tb927.9.6160	hypothetical protein, conserved	ZUnknown	1	3704	207	63.9	54.5	219.2	69.7	102.5	165.2	0.92	0.53	1.33	0.53	-0.1099	0	0	0.1447	0.00482	1	0	0	0	1.02	-0.2485	0	2.33	1.4594
Tb927.8.3940	hypothetical protein, conserved	ZUnknown	1	3334	1501	17.9	13.4	78.5	19	25.6	38.9	0.94	0.52	2.02	0.52	0.2141	0	0	0.6447	1.41e-16	1	0	1	0	1.34	-0.1768	0	2.33	1.3618
Tb927.6.5100	serine/threonine-protein kinase, putative	Protein.kinase	1	3228	650	106.9	96.6	178.6	109.2	77.6	90.1	0.98	1.24	1.98	0.98	0.4854	0	0	0.4309	1.2e-15	1	0	0	0	1.41	0.1181	0	2.33	1.275
Tb927.5.1760	Isoprenylcysteine alpha-carbonyl methylesterase, putative	ZUnknown	1	2914	721	123.2	146.7	474.2	183.6	163	220.3	0.67	0.9	2.15	0.67	0.3103	0	0	-0.8392	3.04e-64	1	0	0	1	1.07	0.5785	0	2.33	1.3103
Tb927.7.3760	phosphatidylserine synthase, putative	Lipids	1	2808	1187	293.4	223.9	315.2	222.1	98.8	150.1	1.32	2.27	2.1	1.32	0.9235	0	0	-0.6074	7.34e-31	1	0	0	1	1.2	-0.0333	0	2.33	1.3277
Tb927.5.3370	hypothetical protein	ZUnknown	1	2046	204	149.5	199.1	247.4	90.8	85.6	70.3	1.65	2.33	3.52	1.65	1.3219	0	0	0.2534	0.00018	1	0	0	0	0.94	-0.3167	0	2.33	1.281
Tb927.3.2920	hypothetical protein, conserved	ZUnknown	1	1585	445	125.4	139.8	158.4	66.5	37	15.8	1.89	3.78	10.03	1.89	2.3877	0	0	0.3038	0.00573	1	0	0	0	0.92	-0.4208	0	2.33	1.3391
Tb927.9.10050	60Kd inner membrane protein, putative	ZUnknown	1	1458	178	25.3	13.4	64.9	26.1	23.3	51.2	0.97	0.58	1.27	0.58	-0.0893	0	0	0.347	1.24e-06	1	0	0	0	1	-0.1479	0	2.33	1.2388
Tb927.11.4840	hypothetical protein, conserved	ZUnknown	1	1365	103	77.7	42	40.9	74.2	59.7	49.2	1.05	0.7	0.83	0.7	-0.2176	0	0	0.3902	4.15e-07	1	0	0	0	1	0.0833	0	2.33	1.3448
Tb927.5.4290	hypothetical protein, conserved	ZUnknown	1	1269	79	29.4	29.3	56	44.2	35.5	31.4	0.67	0.83	1.78	0.67	0.1287	0	0	0.3622	2.84e-05	1	0	0	0	1.06	-0.1899	0	2.33	1.6323
Tb927.10.12170	RAB-interacting protein, putative	Signalling	1	1215	404	75.1	245.6	194.8	73.2	41.6	40.3	1.03	5.9	4.83	1.03	1.9709	0	0	0.8432	5.29e-25	1	0	1	0	1.19	-0.0963	0	2.33	1.3277
Tb927.11.5970	phosphoinositide-specific phospholipase C, calcium-regulated	Membrane.protein	1			75.6	50.4	122	67.4	45	62.4	1.12	1.12	1.96	1.12	0.4854	0	0	-0.2407	0.000346	1	0	0	0	#N/A	-0.2595	0	2.33	1.3277
Tb927.9.10450	hypothetical protein, conserved	ZUnknown	1	4566	577	119.7	66.8	224.1	124.9	135.8	233.2	0.96	0.49	0.96	0.49	-0.3159	0	0	-0.1384	0.0047	1	0	0	0	1	-0.1351	0	2.32	1.3045
Tb927.5.1490	eIF4G1	Translation	1	4330	649	105.6	58.3	694.5	101.8	71.6	134	1.04	0.81	5.18	0.81	1.2286	0	0	-0.0497	0.467	0	0	0	0	1.29	0.9273	0	2.32	1.3505
Tb927.10.2920	hypothetical protein, salivarian tryp only	ZUnknown	1	3887	547	64.3	76.6	180.3	57.3	71.5	106.9	1.12	1.07	1.69	1.07	0.3711	0	0	0.0174	0.829	0	0	0	0	1.08	-0.3661	0	2.32	1.3045
Tb927.9.8490	hypothetical protein, conserved	ZUnknown	1	1444	578	91.1	436.1	133.3	48.1	50.7	32.6	1.89	8.6	4.09	1.89	2.281	0	0	0.2166	0.0194	1	0	0	0	1.3	-0.1137	0	2.32	1.4542
Tb927.11.3170	Der1-like family, putative	ZUnknown	1	1138	462	63.4	66.3	66	41.4	29.3	36.3	1.53	2.26	1.82	1.53	0.903	0	0	0.2656	0.0033	1	0	0	0	1.03	-0.1609	0	2.32	1.3896
Tb927.10.5780	amino acid tansporter, putative	Amino.acid.transport	1			100	65.6	111.5	77.3	43.3	58	1.29	1.52	1.92	1.29	0.6569	0	0	-0.1402	0.145	0	0	0	0	#N/A	-0.2625	0	2.32	1.4594
Tb927.11.5260	SNF2 DNA repair protein, putative,SNF2 family protein	DNA	1			48.4	35.4	146.6	53.8	42.1	74.4	0.9	0.84	1.97	0.84	0.3065	0	0	0.2789	2.38e-06	1	0	0	0	#N/A	-0.5054	0	2.32	1.3951
Tb927.7.5440	hypothetical protein, conserved	Mito.pathway	1			52.7	24.8	334.2	104	84.9	191.5	0.51	0.29	1.75	0.29	-0.2345	0	0	-0.0551	0.26	0	0	0	0	#N/A	-0.207	0	2.32	1.4114
Tb927.4.2580	hypothetical protein, conserved	Mito.pathway	2.07			43	27.9	138.2	57	46.3	92.5	0.75	0.6	1.49	0.6	-0.0791	0	0	-0.1687	0.00719	1	0	0	0	#N/A	-0.3239	0	2.32	1.4699
Tb927.11.10280	metallo-peptidase, Clan MC, Family M14, putative	Protease	1			98.5	65.8	312.7	111.4	95	186.9	0.88	0.69	1.67	0.69	0.111	0	0	0.0288	0.618	0	0	0	0	#N/A	-0.0482	0	2.32	1.2869
Tb927.11.13820	hypothetical protein, conserved	ZUnknown	1			28.9	21.1	58.2	32.9	33.3	60.3	0.88	0.63	0.97	0.63	-0.2746	0	0	0.0018	0.987	0	0	0	0	#N/A	-0.2236	0	2.32	1.263
Tb927.11.2210	diacylglycerol acyltransferase, putative	Lipids	1	6017	1365	176.4	256.1	830.1	271.7	233.4	271.5	0.65	1.1	3.06	0.65	0.6811	0	0	-0.1418	0.00126	1	0	0	0	1.01	-0.2702	0	2.31	1.3618
Tb927.5.1260	Sulfate transporter N-terminal domain with GLY motif/Sulfate transporter family, putative	ZUnknown	1	3776	1946	170.4	191.7	546.9	160.7	113	120.4	1.06	1.7	4.54	1.06	1.2829	0	0	-0.0989	0.105	0	0	0	0	0.89	0.2807	0	2.31	1.3561
Tb927.1.3290	hypothetical protein, conserved	ZUnknown	1	3127	17	54.1	29.9	177.3	66.2	56	136.2	0.82	0.53	1.3	0.53	-0.179	0	0	0.2587	4.64e-07	1	0	0	0	0.99	-0.1751	0	2.31	1.3334
Tb927.10.11880	hypothetical protein, conserved	ZUnknown	1	2874	544	73	47.7	194.4	66.2	118.7	155.6	1.1	0.4	1.25	0.4	-0.1255	0	0	0.1128	0.0347	1	0	0	0	1	-0.3191	0	2.31	1.3618
Tb927.5.1350	hypothetical protein, conserved	ZUnknown	1	1710	55	184.2	512.2	148.3	92.8	63.4	41.6	1.98	8.08	3.56	1.98	2.1827	0	0	0.0439	0.637	0	0	0	0	0.96	-0.0732	0	2.31	1.269
Tb927.7.5920	mercaptopyruvate sulfurtransferase, putative (MST)	Amino.acids	1	1579	316	32.3	25.9	46.1	26.3	34.2	44.9	1.23	0.76	1.03	0.76	0.0096	0	0	-0.1334	0.173	0	0	0	0	0.95	-0.0413	0	2.31	1.2449
Tb927.5.2440	CEP164	Cytoskeleton	1			84.3	45.5	175.8	49.2	37.8	92.8	1.71	1.2	1.89	1.2	0.6781	0	0	-0.0765	0.215	0	0	0	0	#N/A	-0.12	0	2.31	1.3391
Tb927.10.3100	Glycerol-3-phosphate acyltransferase	Lipids	1			57.6	34.1	101.4	67	79.3	112	0.86	0.43	0.91	0.43	-0.4475	0	0	0.14	0.0301	1	0	0	0	#N/A	-0.1346	0	2.31	1.3448
Tb927.11.8720	major surface protease gp63, putative,surface protease homologue	Membrane.protein	1			189.2	98.7	134.9	194.7	121.2	90.2	0.97	0.81	1.5	0.81	0.1287	0	0	-0.5402	3.51e-19	1	0	0	0	#N/A	-0.1196	0	2.31	1.4222
Tb927.10.8390	hypothetical protein, conserved, HECT E3 ligase at C-terminus	Ubiquitin.proteasome	1.15			68.3	24.8	949.5	146.9	131.8	424.7	0.46	0.19	2.24	0.19	-0.0539	0	0	-0.0234	0.634	0	0	0	0	#N/A	0.0148	0	2.31	1.3785
Tb927.10.970	Tetratricopeptide repeat, putative	ZUnknown	1.04			77.9	39	211.8	140.6	169.8	291.7	0.55	0.23	0.73	0.23	-0.9904	0	0	-0.0639	0.246	0	0	0	0	#N/A	-0.3769	0	2.31	1.2928
Tb927.10.11670	hypothetical protein, conserved	ZUnknown	1			69.5	61.6	72.5	40.6	44.8	46.1	1.71	1.38	1.57	1.38	0.6354	0	0	0.2629	0.00115	1	0	0	0	#N/A	-0.3457	0	2.31	1.3219
Tb927.11.12390	hypothetical protein, conserved	ZUnknown	1			45.5	30.4	190.2	58.7	64.7	107.2	0.78	0.47	1.77	0.47	0.0096	0	0	0.0385	0.524	0	0	0	0	#N/A	-0.1779	0	2.31	1.3674
Tb927.8.870	serine/threonine kinase, putative,protein kinase, putative	Protein.kinase	1	7406	5585	75.5	71.6	149.7	64.9	46	59.4	1.16	1.56	2.52	1.16	0.8046	0	0	0.2404	9.04e-05	1	0	0	0	1.99	-0.2481	0	2.3	1.3045
Tb927.4.4520	hypothetical protein, conserved, , polyP and Q in middle	ZUnknown	1	5980	4090	56.1	52.5	269.1	55	42.6	39.5	1.02	1.23	6.81	1.02	1.5945	0	0	0.2784	0.000402	1	0	0	0	1.48	-0.9109	1	2.3	1.4436
Tb927.8.1100	protein kinase	Protein.kinase	1	4787	1294	77.2	68.7	298.7	83.3	138.3	213.9	0.93	0.5	1.4	0.5	-0.0842	0	0	0.229	3.15e-05	1	0	0	0	1.08	-0.0877	0	2.3	1.3391
Tb927.8.2880	hypothetical protein, conserved	Mito.pathway	1.14	4561	1156	30	9.6	118.3	34.1	23.9	87.2	0.88	0.4	1.36	0.4	-0.1844	0	0	-0.0165	0.846	0	0	0	0	0.86	-0.6475	1	2.3	1.373
Tb927.7.4400	IP6K IP6 kinase	Signalling	1	4270	1811	50.5	37	195.1	34.2	32.5	55	1.48	1.14	3.55	1.14	1.0403	0	0	-0.2198	0.00277	1	0	0	0	1.33	0.1872	0	2.3	1.3505
Tb927.11.6220	palmitoyl acyltransferase 7, putative	Lipids	1	2986	896	58.2	65.9	200.6	40.2	40.9	54.3	1.45	1.61	3.69	1.45	1.1699	0	0	-0.3326	1.57e-06	1	0	0	0	1.04	0.5735	0	2.3	1.4276
Tb927.10.11100	deoxyribodipyrimidine photolyase, putative,DNA repair enzyme, putative	DNA	1	2198	480	18.8	11.5	102	31.3	27.6	68.5	0.6	0.42	1.49	0.42	-0.2573	0	0	0.0889	0.182	0	0	0	0	1.01	-0.7498	1	2.3	1.4276
Tb927.11.14940	hypothetical protein, conserved	ZUnknown	1	1900	122	71.3	107.1	104.4	49.4	50.6	44.3	1.44	2.12	2.36	1.44	0.9806	0	0	0.1799	0.0309	1	0	0	0	1.14	-0.0758	0	2.3	1.3161
Tb927.10.3740	hypothetical protein, conserved	ZUnknown	1	1689	111	30.7	19	68.3	40.8	27.2	30.3	0.75	0.7	2.25	0.7	0.3026	0	0	0.1244	0.176	0	0	0	0	1.02	-0.0956	0	2.3	1.4489
Tb927.9.4820	calcium/potassium channel (CAKC), putative	Ions	1			125.1	143.4	284.4	121.6	98.5	131.8	1.03	1.46	2.16	1.03	0.6323	0	0	0.327	3.09e-09	1	0	0	0	#N/A	-0.2611	0	2.3	1.3951
Tb927.2.2470	RNA-editing complex protein,KREPA1 (KREPA1)	Mito.RNA	1			36.6	23.7	85.7	70.7	61.3	90.7	0.52	0.39	0.94	0.39	-0.6974	0	0	0.1394	0.0295	1	0	0	0	#N/A	-0.0688	0	2.3	1.4436
Tb927.9.2630	hypothetical protein, conserved	ZUnknown	1			80.9	45.8	483.5	127	136.3	277	0.64	0.34	1.75	0.34	-0.1361	0	0	-0.1	0.025	1	0	0	0	#N/A	-0.3762	0	2.3	1.263
Tb927.5.2610	hypothetical protein, conserved	ZUnknown	1			27.1	25.2	64	26.8	21.8	35.5	1.01	1.16	1.8	1.01	0.4042	0	0	-0.1256	0.269	0	0	0	0	#N/A	-0.4545	0	2.3	1.3161
Tb927.11.14990	hypothetical protein, conserved	ZUnknown	1			55.7	27	113.6	61.2	34.5	63.6	0.91	0.78	1.79	0.78	0.2141	0	0	0.0013	0.988	0	0	0	0	#N/A	-0.278	0	2.3	1.3505
Tb927.5.2300	formin, putative	ZUnknown	1	4251	820	57.8	71	291.5	50.4	44.6	103	1.15	1.59	2.83	1.15	0.8927	0	0	0.1202	0.0471	1	0	0	0	1.07	-0.4315	0	2.29	1.4803
Tb927.5.490	methyltransferase, putative	Enzyme	1.98	3690	649	22.4	18	126.2	34.4	30.7	68.5	0.65	0.59	1.84	0.59	0.038	0	0	-0.1971	0.00111	1	0	0	0	0.94	-0.1637	0	2.29	1.257
Tb927.2.3730	hypothetical protein, conserved	ZUnknown	1	2748	702	72.5	62.1	106.7	62.5	50.8	55.6	1.16	1.22	1.92	1.16	0.5194	0	0	-0.1712	0.0174	1	0	0	0	1.08	-0.0595	0	2.29	1.4276
Tb927.10.250	hypothetical protein, conserved	ZUnknown	1	2284	88	32.5	32	75.9	30.1	49.3	48.6	1.08	0.65	1.56	0.65	0.1331	0	0	0.0315	0.734	0	0	0	0	0.9	0.0096	0	2.29	1.2388
Tb927.3.990	hypothetical protein, conserved	ZUnknown	1	2110	498	21.4	17.4	32.5	24.2	22.5	36.2	0.88	0.77	0.9	0.77	-0.2345	0	0	0.2084	0.00849	1	0	0	0	1.02	-0.0075	0	2.29	1.251
Tb927.10.5510	endonuclease/exonuclease/phosphatase, putative	DNA	1	1974	173	71.5	87.4	228.9	49.2	41.7	57.5	1.45	2.1	3.98	1.45	1.3277	0	0	0.0104	0.897	0	0	0	0	1.26	0.5908	0	2.29	1.3505
Tb927.7.3060	TAC42 component of tripartite attachment complex	Mito.biogenesis	1	1701	60	87.6	94.6	111.4	78.7	76.8	59.6	1.11	1.23	1.87	1.11	0.4889	0	0	0.2037	0.00716	1	0	0	0	0.97	-0.1901	0	2.29	1.3045
Tb927.9.14040	short-chain dehydrogenase, putative	Enzyme	1	1609	238	12.2	6.9	39.3	17.6	20.3	49.6	0.69	0.34	0.79	0.34	-0.721	0	0	0.0211	0.841	0	0	0	0	1.16	-0.0297	0	2.29	1.3334
Tb927.10.6240	ras-like small GTPase, putative (TbRHP) spindle formation and mitosis	Cell.cycle	1			105.1	91.4	315.2	82.4	76.5	82.5	1.28	1.19	3.82	1.19	1.0681	0	0	0.0613	0.369	0	0	0	0	#N/A	-0.0909	0	2.29	1.5558
Tb927.11.6810	tubulin-tyrsoine ligase-like protein, putative (TTL)	Cytoskeleton	1.14			66.9	49	151.7	67.6	84.1	117.6	0.99	0.58	1.29	0.58	-0.0689	0	0	-0.0729	0.228	0	0	0	0	#N/A	-0.3751	0	2.29	1.2928
Tb927.11.10930	delta tubulin,tubulin delta chain (TUBD1)	Cytoskeleton	1			51.1	40.1	115.2	60	66.5	76.6	0.85	0.6	1.5	0.6	-0.0242	0	0	0.0884	0.207	0	0	0	0	#N/A	-0.1629	0	2.29	1.3896
Tb927.10.5910	BBP86	Cytoskeleton	1			67.5	32.6	121.8	86.2	50.1	94	0.78	0.65	1.3	0.65	-0.1361	0	0	-0.0741	0.279	0	0	0	0	#N/A	-0.0321	0	2.29	1.406
Tb927.11.7218	MERS2, component of mitochondrial complex containing the MERS1 NUDIX hydrolase	Mito.RNA	2			56.2	38.7	87.6	72.3	80.7	111.9	0.78	0.48	0.78	0.48	-0.5564	0	0	0.1907	0.000525	1	0	0	0	#N/A	-0.0362	0	2.29	1.3505
Tb927.11.13440	mitochondrial carrier protein, MCP21	Mito.transport	1			31.8	24.5	40.6	37.6	49	30.7	0.85	0.5	1.32	0.5	-0.1681	0	0	-0.051	0.637	0	0	0	0	#N/A	-0.3566	0	2.29	1.384
Tb927.2.5010	Meiotic cell cortex C-terminal pleckstrin homology, putative	ZUnknown	1			53.1	72.3	134.7	55.3	111.4	96.5	0.96	0.65	1.4	0.65	0.0048	0	0	0.1157	0.113	0	0	0	0	#N/A	-0.229	0	2.29	1.257
Tb927.8.6470	SET domain containing protein, putative	ZUnknown	1			32.1	17.2	84.1	22.2	38.1	64.4	1.45	0.45	1.31	0.45	0.0976	0	0	-0.5283	1.21e-14	1	0	0	0	#N/A	0.0443	0	2.29	1.3391
Tb927.7.2490	hypothetical protein, conserved	ZUnknown	1			60.3	40.6	147.8	73	68.8	74.6	0.83	0.59	1.98	0.59	0.1806	0	0	-0.2169	0.000777	1	0	0	0	#N/A	-0.232	0	2.29	1.516
Tb927.9.2730	hypothetical protein, conserved	ZUnknown	1	5436	1290	50.9	34.1	357.4	48	53.6	119.1	1.06	0.64	3	0.64	0.6477	0	0	0.1376	0.00781	1	0	0	0	1.22	-0.4288	0	2.28	1.257
Tb927.2.5410	ABC transporter, putative	Transporter	1	5149	643	46.3	27.3	235.2	69.6	78.1	129	0.67	0.35	1.82	0.35	-0.0791	0	0	-0.3828	6.89e-11	1	0	0	0	1.46	-0.0939	0	2.28	1.5509
Tb927.11.12510	hypothetical protein, conserved	ZUnknown	1	3481	699	56.2	32.6	156	71.1	93.2	131.5	0.79	0.35	1.19	0.35	-0.3646	0	0	0.12	0.0403	1	0	0	0	1.08	-0.3219	0	2.28	1.281
Tb927.10.11940	ABC1 protein, putative	Transporter	1	2461	374	82.3	74.6	109.5	63.4	61.2	53.7	1.3	1.22	2.04	1.22	0.6041	0	0	0.4391	5.29e-11	1	0	0	0	1.29	-0.3681	0	2.28	1.4906
Tb927.7.4380	Bromodomain protein BDF4	Chromatin	1	2403	488	47.1	23.7	80.3	40.6	50.7	59	1.16	0.47	1.36	0.47	-0.0048	0	0	-0.1732	0.0167	1	0	0	0	1.16	-0.1253	0	2.28	1.3674
Tb927.6.4190	hypothetical protein, conserved	ZUnknown	1	2308	658	63.9	50.2	98.9	53.8	45.4	34.5	1.19	1.11	2.87	1.11	0.7852	0	0	-0.2467	0.00375	1	0	0	0	1.12	-0.2242	0	2.28	1.5705
Tb927.5.1860	hypothetical protein, conserved	ZUnknown	1	1668	92	100.6	90.1	112	101.8	108.4	84.6	0.99	0.83	1.32	0.83	0.0658	0	0	-0.2954	5.07e-05	1	0	0	0	1.31	-0.2658	0	2.28	1.3277
Tb927.4.580	hypothetical protein, conserved	ZUnknown	1	1609	263	32.8	24.4	47.3	35.3	37.2	30.7	0.93	0.66	1.54	0.66	0.0612	0	0	-0.3221	0.000517	1	0	0	0	0.91	-0.1323	0	2.28	1.269
Tb927.10.6140	GPI-GlcNAc transferase	GPI.anchors	1.99	1599	424	115.8	89.5	86.7	83.2	55.9	48.5	1.39	1.6	1.79	1.39	0.672	0	0	-0.0013	0.989	0	0	0	0	1.13	-0.2927	0	2.28	1.3785
Tb927.8.5710	recombination initiation protein NBS1, putative	DNA	1			44.4	35.8	253.2	27.2	49	108.9	1.63	0.73	2.33	0.73	0.6446	0	0	-0.0506	0.439	0	0	0	0	#N/A	0.5492	0	2.28	1.2388
Tb927.11.11920	molybdenum cofactor biosynthesis protein, putative	Enzyme	1			31.6	29.4	75.6	37.9	50.7	61	0.83	0.58	1.24	0.58	-0.179	0	0	-0.1592	0.0115	1	0	0	0	#N/A	-0.0222	0	2.28	1.406
Tb927.6.660	hypothetical protein, conserved	ZUnknown	1			90.6	103.2	171.8	86.4	131.2	152.8	1.05	0.79	1.12	0.79	-0.0194	0	0	0.288	4.35e-07	1	0	0	0	#N/A	-0.1508	0	2.28	1.2449
Tb927.10.2600	hypothetical protein, conserved	ZUnknown	1.11			41.1	65.7	117.3	50.4	33.1	47.5	0.82	1.98	2.47	0.82	0.8128	0	0	0.0396	0.644	0	0	0	0	#N/A	-0.3936	0	2.28	1.269
Tb927.10.11550	hypothetical protein, conserved	ZUnknown	1			78.6	81.6	186.9	74.8	71.1	82.8	1.05	1.15	2.26	1.05	0.5721	0	0	0.2046	0.00231	1	0	0	0	#N/A	-0.2556	0	2.28	1.3277
Tb927.6.820	PUF4	RNA.binding	1.55	6586	3033	130	99.9	755.8	120.6	86.9	127.5	1.08	1.15	5.93	1.08	1.4436	0	0	0.562	1.54e-32	1	0	0	0	2.1	-0.0024	0	2.27	1.3391
Tb927.5.2120	hypothetical protein, conserved, trypanosome-specific	ZUnknown	1	4880	2303	46.2	59.4	228.9	34.5	49.3	95.1	1.34	1.2	2.41	1.2	0.7225	0	0	-0.2377	0.000803	1	0	0	0	1.13	1.2687	0	2.27	1.2016
Tb927.3.5650	protein kinase, putative,serine/threonine protein kinase, putative	Protein.kinase	1	4465	1593	127.5	166.2	210.8	138.9	95.7	86.4	0.92	1.74	2.44	0.92	0.7655	0	0	0.3307	2.93e-06	1	0	0	0	0.99	0.01	0	2.27	1.546
Tb927.11.1260	copper-transporting ATPase-like protein, putative	Ions	1	4332	1251	131.9	64.7	369	136.7	103.3	252.7	0.96	0.63	1.46	0.63	0.0238	0	0	-0.5014	1.63e-29	1	0	0	0	1.07	-0.3535	0	2.27	1.2203
Tb927.10.4050	serine palmitoyltransferase, putative	Lipids	1.64	4089	2270	119.2	134.7	457.8	115.6	111.2	189.3	1.03	1.21	2.42	1.03	0.6354	0	0	0.0941	0.113	0	0	0	0	1.18	2.845	0	2.27	1.2987
Tb927.2.5440	hypothetical protein, conserved	ZUnknown	1	4018	1247	73	56.4	273.4	69.8	74.8	118.5	1.05	0.75	2.31	0.75	0.4542	0	0	0.2464	5.81e-05	1	0	0	0	1.16	-0.4574	0	2.27	1.4222
Tb927.11.10710	hypothetical protein, conserved	ZUnknown	1	3722	132	28.1	14.5	114.1	63.2	46.3	84.3	0.44	0.31	1.35	0.31	-0.5146	0	0	0.1019	0.0785	0	0	0	0	1.16	-0.2323	0	2.27	1.3674
Tb927.9.11890	hypothetical protein, conserved	ZUnknown	1	3202	140	40.8	35	140	39.7	56.9	94.5	1.03	0.62	1.48	0.62	0.0612	0	0	-0.0254	0.721	0	0	0	0	1.06	-0.1118	0	2.27	1.2203
Tb927.3.2820	TFIIF-stimulated CTD phosphatase, putative	Protein.phosphatase	1	2081	239	183.9	229.8	251.9	150.1	91.2	95.1	1.23	2.52	2.65	1.23	1.0931	0	0	-0.2403	0.000278	1	0	0	0	1.05	-0.1722	0	2.27	1.3561
Tb927.2.4620	Transmembrane adaptor Erv26, putative	ZUnknown	1	1405	580	92.6	71.3	50.2	92.6	59.7	36.8	1	1.19	1.36	1	0.2429	0	0	-0.0201	0.868	0	0	0	0	1.1	0.0633	0	2.27	1.3334
Tb927.11.8990	cation transporter, putative	Ions	1			57.2	92	85.4	40.8	51.4	41.8	1.4	1.79	2.04	1.4	0.8018	0	0	0.3145	0.000149	1	0	0	0	#N/A	1.14	0	2.27	1.5008
Tb927.10.7200	TPR repeat, putative	ZUnknown	1.07			25.9	11.2	72.9	40	32.5	89.6	0.65	0.34	0.81	0.34	-0.737	0	0	0.0889	0.166	0	0	0	0	#N/A	-0.5136	0	2.27	1.275
Tb927.11.1940	ESAG4 and RHS homologies	ZUnknown	1			57.5	53.8	54.5	47.8	47.1	35.1	1.2	1.14	1.55	1.14	0.3748	0	0	0.1604	0.104	0	0	0	0	#N/A	-0.02	0	2.27	1.3785
Tb927.5.1290	hypothetical protein, conserved	ZUnknown	1			78.2	140.6	173.6	55.8	43.7	39.4	1.4	3.22	4.41	1.4	1.5898	0	0	0.1107	0.157	0	0	0	0	#N/A	-0.2096	0	2.27	1.5311
Tb927.10.6000	hypothetical protein, conserved	ZUnknown	1.99	6155	1445	60	64.3	564.8	120.5	69.1	213.9	0.5	0.93	2.64	0.5	0.4401	0	0	-0.1518	0.000823	1	0	0	0	1.49	0.5637	0	2.26	1.189
Tb927.1.4340	hypothetical protein, conserved	ZUnknown	1	3982	1301	153.4	148.4	187.4	115.3	103	105.1	1.33	1.44	1.78	1.33	0.6009	0	0	-0.0998	0.148	0	0	0	0	0.96	0.8672	0	2.26	1.2265
Tb927.9.6510	Mitochondrial SSU ribosomal protein, putative	Mito.translation	1	3768	1701	67.9	46.2	164.3	78.4	75.7	88	0.87	0.61	1.87	0.61	0.1592	0	0	0.1396	0.0335	1	0	0	0	1.16	-0.1257	0	2.26	1.669
Tb927.11.11160	Phosphate transporter (TbPho91	Lysosome	1	3143	935	102.9	59.3	202.4	84.7	76.2	132.7	1.21	0.78	1.53	0.78	0.2306	0	0	-0.3081	5.29e-08	1	0	0	0	1.17	0.0131	0	2.26	1.2449
Tb927.11.14270	protein kinase, putative	Protein.kinase	1	2769	388	78.9	96.7	204.2	55.1	42.5	64.3	1.43	2.28	3.18	1.43	1.1995	0	0	0.1345	0.0524	0	0	0	0	0.93	0.0028	0	2.26	1.275
Tb927.5.520	stomatin-like protein, putative	Mito.pathway	1	2285	656	71	68.7	228.8	57.1	53.2	70.8	1.24	1.29	3.23	1.24	0.9411	0	0	-0.4491	4.88e-10	1	0	0	0	1.13	0.0923	0	2.26	1.4383
Tb927.3.2160	Rieske-like [2Fe-2S] domain containing protein, putative	ZUnknown	1	1751	259	66.8	53.9	68.4	42.8	49	40.7	1.56	1.1	1.68	1.1	0.5327	0	0	0.2981	0.000187	1	0	0	0	0.88	-0.0305	0	2.26	1.281
Tb927.4.3100	hypothetical protein, conserved	ZUnknown	2	1548	101	39.1	37.3	95.3	52.9	77.2	59.2	0.74	0.48	1.61	0.48	-0.0842	0	0	-0.3535	5.75e-06	1	0	0	0	0.98	-0.202	0	2.26	1.5008
Tb927.1.1580	cytochrome c oxidase assembly factor, SCO1/2, putative	Mito.e.transport	1.04	1524	597	59	102.1	84.9	37.9	27.2	16.9	1.56	3.75	5.02	1.56	1.7838	0	0	0.1785	0.0796	0	0	0	0	1.08	-0.0617	0	2.26	1.2388
Tb927.10.14250	hypothetical protein, conserved	ZUnknown	1.38	1318	265	32.8	28.6	36.6	31.7	35.9	31.9	1.03	0.8	1.15	0.8	-0.0097	0	0	0.2583	0.00508	1	0	0	0	0.99	-0.0654	0	2.26	1.4436
Tb927.3.3110	Nuclear condensing complex subunits, C-term domain containing protein, putative	ZUnknown	1			158.9	58.2	227.3	191.8	157.6	298.6	0.83	0.37	0.76	0.37	-0.6141	0	0	-0.0451	0.439	0	0	0	0	#N/A	-0.2004	0	2.26	1.2265
Tb927.11.2000	Cupin-like domain containing protein, putative	ZUnknown	1			47.3	23.9	96.6	76.8	41.8	63.2	0.62	0.57	1.53	0.57	-0.1414	0	0	-0.0944	0.203	0	0	0	0	#N/A	-0.1184	0	2.26	1.2327
Tb927.4.4400	hypothetical protein, conserved	ZUnknown	1.02	6565	1319	46.5	30.9	336.1	51	75.6	166.9	0.91	0.41	2.01	0.41	0.1506	0	0	-0.2715	3.07e-08	1	0	0	0	0.96	0.3268	0	2.25	1.2203
Tb927.8.4230	hypothetical protein, conserved	ZUnknown	1	4198	761	42.2	39.3	125.7	37.8	63.6	111.9	1.12	0.62	1.12	0.62	-0.0689	0	0	0.1388	0.0194	1	0	0	0	1.26	-0.3025	0	2.25	1.263
Tb927.4.3170	hypothetical protein, conserved	ZUnknown	1	3514	669	192.1	340.9	436	175.7	113.3	115.3	1.09	3.01	3.78	1.09	1.3932	0	0	0.6498	1.22e-30	1	0	1	0	1.56	0.207	0	2.25	1.2869
Tb927.11.8170	MPK8 protein kinase	Protein.kinase	1	2415	885	73.1	143.6	457.8	72.3	67.2	91.8	1.01	2.14	4.99	1.01	1.4401	0	0	0.0467	0.486	0	0	0	0	1.03	0.0297	0	2.25	1.3391
Tb927.2.4240	GTP binding protein, putative	Mito.pathway	1	2266	960	72.9	77.6	79.9	47.2	28.3	33.5	1.54	2.74	2.39	1.54	1.1527	0	0	-0.0221	0.842	0	0	0	0	1.14	0.2968	0	2.25	1.4803
Tb927.11.14060	hypothetical protein, conserved	ZUnknown	1	1601	262	79.1	195.6	118.3	50.4	41.4	31.2	1.57	4.72	3.79	1.57	1.7485	0	0	0.6089	1.61e-13	1	0	1	0	1.27	-0.0846	0	2.25	1.3785
Tb927.11.14420	hypothetical protein, conserved	ZUnknown	1	1399	158	105.6	95.2	83.6	55.8	41.5	33.3	1.89	2.29	2.51	1.89	1.157	0	0	0.2806	0.00239	1	0	0	0	1.15	-0.1285	0	2.25	1.2869
Tb927.10.13740	calcium-dependent lipid binding protein, putative,synaptotagmin, putative (CaLB)	Cytoskeleton	1.6			179.4	123.8	180.6	224.1	154.6	186.5	0.8	0.8	0.97	0.8	-0.2232	0	0	-0.1313	0.048	1	0	0	0	#N/A	-0.304	0	2.25	1.251
Tb927.11.5920	conserved protein	Mito.pathway	1			30.4	12.7	102.7	51.4	28	65.5	0.59	0.45	1.57	0.45	-0.2009	0	0	-0.1766	0.0379	1	0	0	0	#N/A	-0.0798	0	2.25	1.4005
Tb927.10.9210	hypothetical protein, conserved	ZUnknown	1			32.3	20.8	95.9	28.7	29	42.5	1.13	0.72	2.26	0.72	0.4542	0	0	0.2506	0.00212	1	0	0	0	#N/A	-0.3998	0	2.25	1.3561
Tb927.11.11450	Galactose oxidase, central domain containing protein, putative	ZUnknown	1			29.9	17.4	78.9	29.6	35.9	50.8	1.01	0.48	1.55	0.48	0.0191	0	0	0.2935	4.43e-05	1	0	0	0	#N/A	-0.2864	0	2.25	1.4957
Tb927.3.4210	hypothetical protein, conserved, dsRNA binding domain	Mito.pathway	1	5647	330	43.7	20.5	245.5	66.8	76.2	131.9	0.65	0.27	1.86	0.27	-0.1099	0	0	0.0313	0.609	0	0	0	0	1.11	-0.0893	0	2.24	1.5801
Tb927.8.7800	hypothetical protein, conserved	ZUnknown	1	4699	692	52.9	67.3	415.1	47.6	47.9	112.5	1.11	1.41	3.69	1.11	1.0496	0	0	-1.5115	9.1e-74	1	0	0	1	1.23	-0.4897	0	2.24	1.3505
Tb927.8.1530	hypothetical protein, conserved	Signalling	1	2502	951	66.8	104.9	202.2	59.8	50.9	63.1	1.12	2.06	3.2	1.12	1.0886	0	0	0.3398	4.16e-06	1	0	0	0	1.19	-0.328	0	2.24	1.3618
Tb927.1.730	NADH-ubiquinone oxidoreductase complex I subunit, putative	Mito.e.transport	1	1927	202	72.4	50.9	137.4	51.3	51.9	81.6	1.41	0.98	1.68	0.98	0.4401	0	0	-0.1413	0.0474	1	0	0	0	1.27	-0.1777	0	2.24	1.251
Tb927.9.4440	hypothetical protein, conserved	ZUnknown	1	1800	439	42.5	32.8	85.9	43.5	47.2	54.6	0.98	0.69	1.57	0.69	0.111	0	0	-0.0472	0.579	0	0	0	0	1.02	-0.2061	0	2.24	1.3618
Tb927.8.2400	hypothetical protein, conserved	ZUnknown	1	1122	141	44	118	65.8	23.9	24.6	25.3	1.84	4.8	2.6	1.84	1.6229	0	0	0.0588	0.647	0	0	0	0	0.87	-0.2525	0	2.24	1.3561
Tb927.10.3010	hook complex protein, conserved	Cytoskeleton	1.37			90.8	84.1	403	118.8	233.3	377.5	0.76	0.36	1.07	0.36	-0.454	0	0	0.0643	0.246	0	0	0	0	#N/A	-0.1914	0	2.24	1.3391
Tb927.11.3050	hypothetical protein	Cytoskeleton	1			93.4	152.1	121.6	66.6	54.7	33.2	1.4	2.78	3.66	1.4	1.3859	0	0	0.5163	2.56e-11	1	0	0	0	#N/A	-0.24	0	2.24	1.4751
Tb927.8.3510	thymidylate kinase, putative	Nucleotides	3.37			168.9	111.2	238.5	135.3	111.8	60.1	1.25	0.99	3.97	0.99	1.0496	0	0	-0.1173	0.191	0	0	0	0	#N/A	0.0737	0	2.24	1.669
Tb927.4.1700	protein kinase, putative	Protein.kinase	1.57			61	113.5	150.2	60.6	77.9	86.9	1.01	1.46	1.73	1.01	0.4854	0	0	0.2133	0.000249	1	0	0	0	#N/A	-0.1223	0	2.24	1.3045
Tb927.4.1910	hypothetical protein, conserved, no domains, K-specific	ZUnknown	1			113.4	110.3	368.6	66.9	50	68	1.7	2.21	5.42	1.7	1.6369	0	0	0.3732	2.02e-10	1	0	0	0	#N/A	-1.8404	1	2.24	1.269
Tb927.10.1340	hypothetical protein, conserved	ZUnknown	1			38.9	28.1	76.8	50.9	42.3	48.2	0.76	0.66	1.59	0.66	0.0048	0	0	-0.2302	0.00192	1	0	0	0	#N/A	-0.2051	0	2.24	1.3219
Tb927.10.6100	Protein of unknown function (DUF2419), putative	ZUnknown	1.96			58.5	47.8	102.8	69.6	62	58.9	0.84	0.77	1.75	0.77	0.1635	0	0	0.0069	0.943	0	0	0	0	#N/A	-0.2009	0	2.24	1.3505
Tb927.3.2860	hypothetical protein, conserved	ZUnknown	1			138.2	205.3	193.4	85.3	43.1	52.2	1.62	4.76	3.7	1.62	1.7485	0	0	-0.2755	0.00436	1	0	0	0	#N/A	-0.2698	0	2.24	1.4647
Tb927.11.13740	ACP5, GRESAG 4-like	GRESAG	1.02	4092	360	151.9	46.1	327.5	217.4	106.1	249.3	0.7	0.43	1.31	0.43	-0.2981	0	0	0.2342	1.15e-05	1	0	0	0	1.07	0.174	0	2.23	1.3277
Tb927.9.14170	hypothetical protein, conserved	ZUnknown	1	2669	666	56.4	38	153.2	54.9	18.9	41.4	1.03	2.01	3.7	1.03	1.1678	0	0	0.0907	0.358	0	0	0	0	1.07	-0.1599	0	2.23	1.6182
Tb927.10.10300	hypothetical protein, conserved	ZUnknown	1.54	2211	407	41.9	32.5	102	52.7	52.4	57.5	0.8	0.62	1.77	0.62	0.0886	0	0	0.1809	0.0231	1	0	0	0	1.09	-0.3905	0	2.23	1.2928
Tb927.4.2290	glucose transporter, putative	Glucose.glycerol	1	1812	121	145.8	226.5	293	107.7	77.9	88.4	1.35	2.91	3.31	1.35	1.3353	0	0	0.3327	1.66e-08	1	0	0	0	1.17	-0.0814	0	2.23	1.263
Tb927.10.1710	DNA polymerase eta, putative	DNA	1	1612	15	25.7	26.7	75.8	34	50.2	72.5	0.76	0.53	1.05	0.53	-0.3585	0	0	0.208	0.00206	1	0	0	0	#N/A	-0.1917	0	2.23	1.263
Tb927.11.12570	kinetoplastid-specific dual specificity phosphatase, putative	Phosphatase	1	1039	125	29	26.5	84.1	25.9	37	46.1	1.12	0.72	1.82	0.72	0.2869	0	0	0.3163	6.28e-05	1	0	0	0	1.06	-0.421	0	2.23	1.406
Tb927.8.700	DNA repair and recombination helicase protein PIF7	Mito.DNA	1			99.1	43.5	220.1	78.9	51.6	104	1.26	0.84	2.12	0.84	0.4923	0	0	-0.345	2.17e-08	1	0	0	0	#N/A	-0.4124	0	2.23	1.3334
Tb927.10.570	exocyst complex component Sec8	Vesicular.transport	1.38			105.6	60.4	294.6	135.4	159.7	250.8	0.78	0.38	1.17	0.38	-0.3646	0	0	-0.0447	0.437	0	0	0	0	#N/A	0.0074	0	2.23	1.2449
Tb927.7.340	Alpha/beta hydrolase family, putative	ZUnknown	1			29.5	82	74.4	15.9	19.5	27.5	1.86	4.21	2.71	1.86	1.5493	0	0	0.2191	0.0185	1	0	0	0	#N/A	-0.2691	0	2.23	1.2265
Tb927.1.1420	conserved protein, unknown function	ZUnknown	1			131.7	226.6	330.8	96.9	58.4	98.1	1.36	3.88	3.37	1.36	1.5211	0	0	0.3187	1.87e-08	1	0	0	0	#N/A	0.0762	0	2.23	1.5801
Tb927.3.4630	UDP-glucose:glycoprotein glucosyltransferase, ER quality control	Glycans	1	5329	250	183.7	75.5	310	253.1	344.7	474.9	0.73	0.22	0.65	0.22	-0.9069	0	0	-0.1552	0.000416	1	0	0	0	1.57	0.29	0	2.22	1.3103
Tb927.9.15460	calcium motive p-type ATPase, putative	Ions	1	5020	1642	399.6	255.9	341.4	713.7	496.1	585.5	0.56	0.52	0.58	0.52	-0.8538	0	0	-0.201	7.51e-06	1	0	0	0	1.41	0.6347	0	2.22	1.1763
Tb927.4.3160	Dihydroxyacetonephosphate acyltransferase	Lipids	1	4829	1057	66.6	57.5	320.8	116.8	115.2	183.8	0.57	0.5	1.75	0.5	-0.0893	0	0	-0.9854	4.63e-78	1	0	0	1	1.61	0.712	0	2.22	1.1699
Tb927.10.3630	hypothetical protein, conserved	ZUnknown	1.23	3276	2130	20.8	8.3	35.4	12.9	15.5	28	1.61	0.54	1.26	0.54	0.1848	0	0	0.2098	0.0592	0	0	0	0	1.2	-0.0735	0	2.22	1.2203
Tb927.11.12930	ATP-dependent DEAD/H RNA helicase, putative, no clear yeast homologue	RNA.helicase	1	2412	99	70.5	39.8	133.2	97.8	99.2	101.1	0.72	0.4	1.32	0.4	-0.2981	0	0	-0.028	0.704	0	0	0	0	1.05	-0.2317	0	2.22	1.5008
Tb927.4.1820	selenocysteine-tRNA-specific elongation factor, putative	Translation	1	2202	128	40.7	26.6	96.8	61.8	44.6	50.7	0.66	0.6	1.91	0.6	0.0795	0	0	-0.177	0.0152	1	0	0	0	1	-0.1878	0	2.22	1.2928
Tb927.8.4530	hypothetical protein, conserved	ZUnknown	1	1705	589	160.8	195.7	112.5	100.9	46.2	31.9	1.59	4.24	3.53	1.59	1.6415	0	0	0.1833	0.0516	0	0	0	0	1.11	-0.1491	0	2.22	1.4168
Tb927.9.10070	hypothetical protein, conserved	Mito.pathway	1			15.8	11.6	45.1	23.7	17.5	38.4	0.67	0.66	1.17	0.66	-0.263	0	0	0.1541	0.0649	0	0	0	0	#N/A	-0.28	0	2.22	1.281
Tb927.7.3430	cyclophilin-type peptidyl-prolyl cis-trans isomerase, putative	Mito.translation	1			39.6	30.8	44.6	34.8	29.8	30.5	1.14	1.03	1.46	1.03	0.275	0	0	0.0351	0.761	0	0	0	0	#N/A	-0.2735	0	2.22	1.5311
Tb927.10.9230	adaptin complex AP4 beta subunit	Vesicular.transport	1.18			68.8	51.1	152.6	61.6	38.6	78.1	1.12	1.32	1.95	1.12	0.5493	0	0	0.1295	0.0948	0	0	0	0	#N/A	-0.2267	0	2.22	1.257
Tb927.10.13070	hypothetical protein, conserved	ZUnknown	1.23			45.2	30.9	257	53.8	83.7	180.8	0.84	0.37	1.42	0.37	-0.1899	0	0	0.2082	0.00037	1	0	0	0	#N/A	-0.0703	0	2.22	1.3103
Tb927.10.12690	hypothetical protein, conserved	ZUnknown	1			74.3	46.8	53.4	47	66.4	54.3	1.58	0.7	0.98	0.7	0.1199	0	0	0.2297	0.00532	1	0	0	0	#N/A	-0.1347	0	2.22	1.3103
Tb927.9.8330	hypothetical protein	ZUnknown	1			49.3	37.9	105.2	28.8	35.9	54.1	1.71	1.06	1.94	1.06	0.6508	0	0	0.7095	4.76e-29	1	0	1	0	#N/A	0.2292	0	2.22	1.3219
Tb927.8.7840	dynein heavy chain, putative, not a DHC in Wickstead analysis	Cytoskeleton	1	4330	1601	78.5	85.5	250.1	45.1	41.6	44.9	1.74	2.06	5.57	1.74	1.6431	0	0	-0.7314	3.31e-25	1	0	0	1	1.39	0.8225	0	2.21	1.3561
Tb927.10.13350	hypothetical protein, conserved	ZUnknown	1	3996	515	67.2	116.3	196.4	63.9	72.7	94.2	1.05	1.6	2.08	1.05	0.6569	0	0	-0.0822	0.183	0	0	0	0	1.11	-0.2323	0	2.21	1.275
Tb927.11.7590	hypothetical protein, conserved, trypanosome-specific	ZUnknown	1.06	3310	347	61.8	39.1	161.6	91.8	84.8	109.1	0.67	0.46	1.48	0.46	-0.2009	0	0	-0.1614	0.00273	1	0	0	0	0.98	-0.3424	0	2.21	1.5008
Tb927.2.2360	Ankyrin repeats (3 copies)/Zinc finger, C3HC4 type (RING finger), putative	ZUnknown	1	3223	863	87.7	85.9	296.8	65.9	51	71.4	1.33	1.68	4.16	1.33	1.257	0	0	-0.0028	0.974	0	0	0	0	1.22	0.3747	0	2.21	1.373
Tb927.11.9520	DNA topoisomerase III, TOPO3alpha	DNA	1	3023	115	112.6	82.6	206.1	151.8	99.5	147.4	0.74	0.83	1.4	0.74	-0.0145	0	0	0.162	0.003	1	0	0	0	1.16	-0.1791	0	2.21	1.275
Tb927.8.3830	ATP-dependent DEAD/H RNA helicase, putative,mitochondrial	Mito.RNA	1	2965	519	23.6	20.2	108.7	23.6	34.2	66.4	1	0.59	1.64	0.59	0.1066	0	0	-0.0111	0.913	0	0	0	0	1.1	-0.3655	0	2.21	1.433
Tb927.8.6170	transketolase, putative (TK)	PPP	1	2891	779	115.3	84.6	187.9	117.6	72	77.2	0.98	1.18	2.43	0.98	0.6135	0	0	0.1002	0.173	0	0	0	0	1.06	-0.2593	0	2.21	1.4906
Tb927.8.4540	PBP1	RNA.degradation	1	2828	684	186.2	186.1	377.3	143.8	129.4	216.7	1.29	1.44	1.74	1.29	0.5753	0	0	-0.4683	2.8e-21	1	0	0	0	1.22	1.0961	0	2.21	1.281
Tb927.5.3270	Autophagy protein Apg6, putative	ZUnknown	1	2722	215	118.8	89.2	137.5	94.6	100.2	126.4	1.26	0.89	1.09	0.89	0.111	0	0	-0.1338	0.0301	1	0	0	0	1.01	-0.1573	0	2.21	1.1763
Tb927.10.800	hypothetical protein, conserved	ZUnknown	1	2572	1299	133.8	111	81.3	66.2	62.9	49.6	2.02	1.76	1.64	1.64	0.8533	0	0	0.2639	0.000428	1	0	0	0	0.95	-0.3543	0	2.21	1.2141
Tb927.5.3930	major facilitator superfamily, putative	ZUnknown	1.82	2077	671	74	110.2	192.3	61.8	45.7	61.7	1.2	2.41	3.12	1.2	1.1656	0	0	0.0006	0.995	0	0	0	0	1.14	-0.1335	0	2.21	1.4906
Tb927.10.1700	hypothetical protein, conserved	ZUnknown	1	1858	346	32.7	19	67.6	43	40.2	56.5	0.76	0.47	1.2	0.47	-0.304	0	0	0.247	0.00207	1	0	0	0	1.25	-0.2378	0	2.21	1.4114
Tb927.2.4670	hypothetical protein, conserved	ZUnknown	1	1747	364	127.9	176.1	129.1	106.7	57.1	36.4	1.2	3.08	3.55	1.2	1.384	0	0	0.2053	0.0402	1	0	0	0	0.92	-0.0735	0	2.21	1.2388
Tb927.4.1640	UDP-galactose transporter, putative	Glycans	1	1637	466	298.2	588.1	349.3	192.4	122.1	92.1	1.55	4.82	3.79	1.55	1.7599	0	0	-0.0296	0.723	0	0	0	0	1.09	-0.1177	0	2.21	1.2928
Tb927.10.6560	Protein of unknown function DUF72, putative	ZUnknown	1	1544	191	76.1	75.9	150.5	65.7	53.8	38.9	1.16	1.41	3.87	1.16	1.1021	0	0	0.264	0.00429	1	0	0	0	1.05	-0.3016	0	2.21	1.757
Tb927.6.3030	hypothetical protein, conserved	ZUnknown	1			169.8	114.5	274.4	149.7	105.3	142.3	1.13	1.09	1.93	1.09	0.4681	0	0	0.0427	0.584	0	0	0	0	#N/A	-0.2666	0	2.21	1.2327
Tb927.11.12280	hypothetical protein, conserved	ZUnknown	1			69.2	66.8	97	47.6	46.7	55.2	1.45	1.43	1.76	1.43	0.6292	0	0	0.4764	2.01e-10	1	0	0	0	#N/A	-0.2474	0	2.21	1.251
Tb927.10.15780	hypothetical protein, conserved	ZUnknown	1.92			51.6	45.5	131.9	42	68.3	80.6	1.23	0.67	1.64	0.67	0.2388	0	0	-0.0777	0.25	0	0	0	0	#N/A	-0.2679	0	2.21	1.3334
Tb927.8.2690	SET domain containing protein, putative	ZUnknown	1.16	4877	1190	51.6	24	71.1	55.6	26.7	32.6	0.93	0.9	2.18	0.9	0.4186	0	0	-0.0272	0.814	0	0	0	0	1.07	0.0535	0	2.2	1.2449
Tb927.10.5180	TPR-repeat-containing chaperone protein DNAJ, putative	Chaperone	1.92	4272	1295	89.6	81.1	245.1	91.6	94.7	142.6	0.98	0.86	1.72	0.86	0.2469	0	0	-0.1392	0.00904	1	0	0	0	1.31	-0.3503	0	2.2	1.3277
Tb927.11.2700	BBP69	Cytoskeleton	1	3135	851	108.1	69.2	114.2	107.9	63.3	95.3	1	1.09	1.2	1	0.1331	0	0	-0.0909	0.176	0	0	0	0	1.02	-0.1186	0	2.2	1.1635
Tb927.10.7310	terminal uridylyltransferase 3, putative (TUT3)	RNA.processing	1	2701	131	85	96.3	290.8	108.6	68.6	80.3	0.78	1.4	3.62	0.78	0.9511	0	0	-0.1544	0.0133	1	0	0	0	0.96	-0.0324	0	2.2	1.4542
Tb927.7.6920	hypothetical protein, conserved	ZUnknown	1	2599	647	62.3	62.9	75.6	43.1	44.7	48	1.45	1.41	1.58	1.41	0.5656	0	0	-0.0017	0.987	0	0	0	0	1.01	-0.1563	0	2.2	1.3045
Tb927.9.2940	hypothetical protein, conserved	ZUnknown	1	2198	559	101.5	68.4	197.6	78.3	68.9	104.4	1.3	0.99	1.89	0.99	0.4785	0	0	0.072	0.252	0	0	0	0	1.31	0.4336	0	2.2	1.263
Tb927.2.3920	Complex 1 protein (LYR family), putative	ZUnknown	1	938	126	22	19.5	53.2	25.2	17.4	27	0.87	1.12	1.97	0.87	0.4005	0	0	0.186	0.0967	0	0	0	0	1.17	-0.2375	0	2.2	1.3674
Tb927.7.3000	Trypanosome-specific kinesin family 2	Cytoskeleton	1			60.1	49.6	258.3	69.7	72.3	194	0.86	0.69	1.33	0.69	-0.0589	0	0	0.0407	0.491	0	0	0	0	#N/A	1.0711	0	2.2	1.1506
Tb927.9.13250	NADPH--cytochrome p450 reductase, putative (CPR)	Enzyme	1			57.1	29.5	98.2	73.9	53	61.7	0.77	0.56	1.59	0.56	-0.039	0	0	-0.0157	0.857	0	0	0	0	#N/A	-0.1761	0	2.2	1.4222
Tb927.11.9350	phosphonopyruvate decarboxylase-like protein, putative	Glucose.glycerol	1			45.2	32.5	83.2	61	47.7	67.8	0.74	0.68	1.23	0.68	-0.179	0	0	-0.2746	0.000263	1	0	0	0	#N/A	-0.1706	0	2.2	1.4114
Tb927.11.16290	AUT2/APG4/ATG4 cysteine peptidase, putative (ATG4.1)	Lysosome	1			49.5	46.7	64.4	40.4	43.2	37.9	1.23	1.08	1.7	1.08	0.4186	0	0	0.3301	7.29e-05	1	0	0	0	#N/A	-0.1627	0	2.2	1.373
Tb927.1.880	MDN1 homologue. Dynein-related AAA ATPase involved in pre-60S assembly and export	rRNA.tRNA.process	1.14			71.5	18.9	702.4	173.9	133.5	456.2	0.41	0.14	1.54	0.14	-0.5215	0	0	-0.3853	5.95e-15	1	0	0	0	#N/A	-0.0661	0	2.2	1.2388
Tb927.11.16210	CARP1 cyclic nucleotide-binding protein, putative	Signalling	1			79.9	72.4	156.4	58.7	60	98.8	1.36	1.21	1.58	1.21	0.4681	0	0	0.136	0.0294	1	0	0	0	#N/A	-0.1494	0	2.2	1.1763
Tb927.10.5240	cAMP binding protein, putative	ZUnknown	2.01			149	68.7	539.5	246.8	187.2	377.1	0.6	0.37	1.43	0.37	-0.3219	0	0	-0.1976	2.01e-05	1	0	0	0	#N/A	0.9672	0	2.2	1.1827
Tb927.11.5100	hypothetical protein, conserved	ZUnknown	1			83	54	101.6	41.4	36.6	76	2	1.48	1.34	1.34	0.6841	0	0	-0.2242	0.000845	1	0	0	0	#N/A	-0.2712	0	2.2	1.189
Tb927.10.3910	hypothetical protein, conserved	ZUnknown	1			232	137.9	187	198.6	112	112.3	1.17	1.23	1.67	1.17	0.4401	0	0	-0.3804	4.33e-09	1	0	0	0	#N/A	0.0378	0	2.2	1.2141
Tb927.9.11970	hypothetical protein, conserved	ZUnknown	1			114.7	79.9	179.6	72.9	59.3	74.4	1.57	1.35	2.41	1.35	0.8292	0	0	-0.0466	0.553	0	0	0	0	#N/A	-0.0654	0	2.2	1.3277
Tb927.11.14040	RIC1, putative	ZUnknown	1			108.6	117.4	293	152.5	88.6	137.3	0.71	1.33	2.13	0.71	0.4751	0	0	-0.1419	0.00968	1	0	0	0	#N/A	-0.314	0	2.2	1.3448
Tb927.10.1780	hypothetical protein	ZUnknown	1			35.5	51	28.2	36.6	26.1	18.4	0.97	1.95	1.53	0.97	0.5688	0	0	-0.3739	0.00989	1	0	0	0	#N/A	-0.263	0	2.2	1.373
Tb927.5.3530	hypothetical protein, conserved	ZUnknown	1		1747	46.6	44.4	103.7	45.1	20	20.7	1.03	2.22	5.01	1.03	1.4612	0	0	0.2212	0.0411	1	0	0	0	0.98	-0.2681	0	2.2	1.6088
Tb927.7.7160	kinetoplastid-specific dual specificity phosphatase, putative	Phosphatase	1	6022	2911	62.6	86.2	294.4	60.3	80.9	118.2	1.04	1.07	2.49	1.04	0.6167	0	0	0.2433	9.9e-06	1	0	0	0	1.37	0.2363	0	2.19	1.263
Tb927.5.3290	Protein of unknown function, putative	ZUnknown	1	5544	1682	96.2	97.7	437.1	72.8	73.8	116.7	1.32	1.32	3.75	1.32	1.0909	0	0	0.2701	7.76e-09	1	0	0	0	1.15	1.3555	0	2.19	1.2079
Tb927.3.4560	AMPKalpha2	Protein.kinase	1.01	4446	1874	95.9	147.7	316.6	77.4	76.2	119.1	1.24	1.94	2.66	1.24	0.961	0	0	0.2141	7.11e-05	1	0	0	0	0.93	1.7113	0	2.19	1.2016
Tb927.5.1130	hypothetical protein, conserved	Mito.pathway	1	3540	2504	95.4	87.9	147	77.3	38.5	44.5	1.23	2.28	3.3	1.23	1.1827	0	0	0.4686	4.16e-10	1	0	0	0	2.39	3.2103	0	2.19	1.281
Tb927.7.6740	ATPase family associated with various cellular activities (AAA), putative	ZUnknown	1	3312	216	28.4	15.2	86.7	39	42.8	74.9	0.73	0.36	1.16	0.36	-0.415	0	0	0.0564	0.415	0	0	0	0	1.11	-0.304	0	2.19	1.2388
Tb927.11.5330	hypothetical protein, conserved	ZUnknown	1	2736	386	82.6	81.5	162.5	91.9	65.6	59.3	0.9	1.24	2.74	0.9	0.7019	0	0	0.1095	0.146	0	0	0	0	1.1	-0.1574	0	2.19	1.4957
Tb927.9.6580	hypothetical protein, conserved	ZUnknown	1	2353	91	58.2	19.4	89.9	68.6	40.2	56.7	0.85	0.48	1.59	0.48	-0.039	0	0	-0.5517	3.43e-12	1	0	0	0	1.03	-0.1242	0	2.19	1.189
Tb927.11.15660	hypothetical protein, conserved	ZUnknown	1.57	2013	307	77.5	151.2	159.5	43	68.4	65.5	1.8	2.21	2.44	1.8	1.1043	0	0	-0.1414	0.0684	0	0	0	0	0.99	0.068	0	2.19	1.2449
Tb927.6.4700	hypothetical protein, conserved	ZUnknown	1	1618	564	48.6	40.3	78.8	35.4	42.5	44.9	1.37	0.95	1.76	0.95	0.4436	0	0	0.199	0.0151	1	0	0	0	1.21	-0.2193	0	2.19	1.384
Tb927.10.4170	CAP292 Clathrin-associated protein, resembles yeast myosins, homologue of centrosome-associated protein CEP250	Cytoskeleton	1			65.4	32.1	200.1	94.6	106.2	302.4	0.69	0.3	0.66	0.3	-0.8625	0	0	-0.0964	0.0368	1	0	0	0	#N/A	-0.2494	0	2.19	1.2388
Tb927.11.7770	oxidoreductase-like protein	Enzyme	1			115.4	67	184.4	125.2	89.9	107	0.92	0.75	1.72	0.75	0.1763	0	0	-0.2531	3e-06	1	0	0	0	#N/A	-0.229	0	2.19	1.1699
Tb927.7.5150	exocyst complex component Exo84	Vesicular.transport	1			89.8	43.4	240.6	151.3	140.6	208.3	0.59	0.31	1.16	0.31	-0.5423	0	0	-0.0449	0.428	0	0	0	0	#N/A	-0.2877	0	2.19	1.2449
Tb927.7.3930	CAP161 Clathrin-associated protein	Vesicular.transport	1			33.7	22.2	252	57	68.5	146.2	0.59	0.32	1.72	0.32	-0.1899	0	0	0.0572	0.368	0	0	0	0	#N/A	-0.1774	0	2.19	1.3505
Tb927.11.2630	diphthamide biosynthesis enzyme Dph1/Dph2 domain containing protein, putative	ZUnknown	1			67.2	43.9	108.8	73.3	49.3	67.3	0.92	0.89	1.62	0.89	0.1932	0	0	-0.2886	4.33e-05	1	0	0	0	#N/A	-0.3498	0	2.19	1.2265
Tb927.6.4490	hypothetical protein, conserved	ZUnknown	1			103.5	196.4	229.7	56.3	43.3	36.9	1.84	4.54	6.22	1.84	2.0704	0	0	0.4623	2.29e-09	1	0	0	0	#N/A	0.8695	0	2.19	1.2987
Tb927.11.15730	cyclic nucleotide-binding domain containing protein, putative	ZUnknown	1			66.6	71.2	463.1	68.3	62.3	92	0.98	1.14	5.03	0.98	1.253	0	0	-0.0369	0.608	0	0	0	0	#N/A	0.4914	0	2.19	1.4222
Tb927.4.950	hypothetical protein, conserved	ZUnknown	1			22.4	16.4	50.9	24.8	25.6	33.7	0.9	0.64	1.51	0.64	0.0238	0	0	-0.4865	3.62e-07	1	0	0	0	#N/A	-0.0522	0	2.19	1.5993
Tb927.2.2580	hypothetical protein, conserved	ZUnknown	1	4652	1069	56.1	32.6	230.3	48.9	49.4	128.3	1.15	0.66	1.8	0.66	0.267	0	0	-0.1612	0.00278	1	0	0	0	1.09	-0.3861	0	2.18	1.2388
Tb927.7.1210	regulator of chromosome condensation, putative	Cell.cycle	1	4345	1699	31.8	42.8	180	27.7	31	46.8	1.15	1.38	3.85	1.15	1.0886	0	0	0.2555	6.84e-05	1	0	0	0	1.14	-0.0118	0	2.18	1.4383
Tb927.11.890	hypothetical protein, conserved	ZUnknown	1	4282	244	209.4	282.8	788.9	338.9	438.9	579	0.62	0.64	1.36	0.62	-0.1954	0	0	-0.4844	1.8e-24	1	0	0	0	1.01	-0.2005	0	2.18	1.269
Tb927.10.3020	hypothetical protein, conserved	ZUnknown	1	3973	1608	50.4	34.3	184.5	91.6	84.5	149.5	0.55	0.41	1.23	0.41	-0.454	0	0	0.2423	2.72e-06	1	0	0	0	1.02	-0.2123	0	2.18	1.3334
Tb927.3.1880	hypothetical protein, conserved, trypanosome-specific	ZUnknown	1	2313	115	44	37.5	95.5	47.8	39.2	62.4	0.92	0.96	1.53	0.92	0.1848	0	0	0.2034	0.00401	1	0	0	0	1.19	-0.1469	0	2.18	1.269
Tb927.9.11810	membrane transporter protein, putative	Transporter	1	1758	220	188.5	297.3	316.7	117.1	72.2	70.1	1.61	4.12	4.52	1.61	1.7726	0	0	0.5306	6.75e-15	1	0	0	0	1.41	0.0729	0	2.18	1.3785
Tb927.6.3600	LSU ribosomal protein, mitochondrial, putative	Mito.translation	1	1601	197	180.6	331.5	240.7	138.9	103.9	74.3	1.3	3.19	3.24	1.3	1.3655	0	0	-0.2851	0.000133	1	0	0	0	1.06	-0.0925	0	2.18	1.269
Tb927.4.1710	rhodanese-like domain containing protein, putative	ZUnknown	1	1296	547	80	60.3	64.5	62.8	64.1	55	1.27	0.94	1.17	0.94	0.1721	0	0	0.1596	0.0512	0	0	0	0	0.9	-0.1587	0	2.18	1.189
Tb927.7.5470	POMP36	Mito.membrane	1.62			57.5	57.6	138.8	57.3	92.9	103.7	1	0.62	1.34	0.62	-0.0194	0	0	0.2014	0.00105	1	0	0	0	#N/A	-0.1341	0	2.18	1.2869
Tb927.8.7520	aminopeptidase, putative	Protease	1			22.1	17.4	88.1	35.1	46.7	78.9	0.63	0.37	1.12	0.37	-0.5009	0	0	-0.2149	0.000727	1	0	0	0	#N/A	-0.293	0	2.18	1.275
Tb927.7.4310	pyridine nucleotide-disulphide oxidoreductase, putative	ZUnknown	1			41.9	23.3	94.4	43.8	31.8	48.7	0.96	0.73	1.94	0.73	0.275	0	0	0.0119	0.904	0	0	0	0	#N/A	-0.2185	0	2.18	1.269
Tb927.7.6150	Protein of unknown function (DUF3522), putative	ZUnknown	1.1			104.4	118.6	92.8	91.9	52.7	34.5	1.14	2.25	2.69	1.14	1.0191	0	0	-0.0334	0.801	0	0	0	0	#N/A	-0.273	0	2.18	1.2928
Tb927.6.4620	hypothetical protein, conserved	ZUnknown	1			49.1	46.3	48.2	67.7	63.8	34.9	0.73	0.73	1.38	0.73	-0.0791	0	0	0.2628	0.0107	1	0	0	0	#N/A	-0.0813	0	2.18	1.3505
Tb927.8.6830	Kinesin-like but poor match	Cytoskeleton	1	6549	1073	57.1	25.6	479.8	94.4	103.2	243.6	0.6	0.25	1.97	0.25	-0.0893	0	0	-0.0373	0.501	0	0	0	0	1.31	0.1363	0	2.17	1.2079
Tb927.10.15390	FAZ7 Trypanosome-specific kinesin family 2	Cytoskeleton	1.96	5808	2236	91.4	56.7	391.9	117.7	84.9	187.8	0.78	0.67	2.09	0.67	0.2388	0	0	-0.1103	0.0294	1	0	0	0	1.12	0.7189	0	2.17	1.144
Tb927.3.3130	POMP24	Mito.membrane	1	5247	122	127.3	59.8	312.2	196.5	288	415.1	0.65	0.21	0.75	0.21	-0.8979	0	0	-0.2634	8.51e-09	1	0	0	0	1.07	0.3478	0	2.17	1.3505
Tb927.9.5620	hypothetical protein, conserved	ZUnknown	1	4354	118	91.2	43.5	242.2	158.4	142.9	197	0.58	0.3	1.23	0.3	-0.5077	0	0	-0.1153	0.0214	1	0	0	0	1.07	-0.3828	0	2.17	1.3219
Tb927.11.11530	histone acetyltransferase HAT2	Chromatin	1	2963	129	78	71.8	134.3	73.3	95	88	1.06	0.76	1.53	0.76	0.1592	0	0	0.086	0.21	0	0	0	0	1.16	-0.286	0	2.17	1.2869
Tb927.2.1760	hypothetical protein, conserved	ZUnknown	1.07	2916	499	306.9	285.4	493	158.2	145.6	215.7	1.94	1.96	2.29	1.94	1.045	0	0	0.4235	5.04e-17	1	0	0	0	1.09	-0.0441	0	2.17	1.257
Tb927.11.16990	Mitochondrial LSU-associated, 50S ribosome-binding GTPase	Mito.pathway	1.38	2484	385	54.6	41.9	120.3	53	71.8	78.8	1.03	0.58	1.53	0.58	0.0658	0	0	0.1894	0.00481	1	0	0	0	1.14	-0.0068	0	2.17	1.263
Tb927.10.9130	pre-mRNA splicing factor ATP-dependent RNA helicase, putative	rRNA.tRNA.process	1	2394	245	70	28.6	96.7	83.4	46.7	71	0.84	0.61	1.36	0.61	-0.0944	0	0	-0.1825	0.00524	1	0	0	0	1.07	-0.2286	0	2.17	1.2079
Tb927.7.600	DNA ligase, putative,mitochondrial DNA ligase homolog, putative	DNA	1.01	2337	660	41.7	26	74.6	38.1	41.5	56.3	1.09	0.63	1.33	0.63	0.0238	0	0	0.1099	0.148	0	0	0	0	1	-0.3434	0	2.17	1.3103
Tb927.11.16370	SHQ1 protein, putative	ZUnknown	1	2252	294	113.7	96.4	155.5	65.4	56.9	76.7	1.74	1.69	2.03	1.69	0.8639	0	0	-0.0444	0.548	0	0	0	0	1.1	-0.336	0	2.17	1.189
Tb927.3.2010	hypothetical protein, conserved	Mito.pathway	1	1913	242	66.1	47.7	92.8	81.4	77.5	74.3	0.81	0.62	1.25	0.62	-0.1627	0	0	0.0245	0.768	0	0	0	0	1.02	-0.1279	0	2.17	1.2388
Tb927.10.6830	Bardet-Biedl syndrome 4 protein homolog (BBS4-like protein 4), putative	Cytoskeleton	2.02	1778	375	36.7	36.9	95.9	50.6	45.7	50.2	0.73	0.81	1.91	0.73	0.2016	0	0	0.1568	0.0697	0	0	0	0	1.18	-0.2812	0	2.17	1.384
Tb927.11.3350	MT1 miltefosine phospholipid-transporting ATPase 1-like protein, flippase	Lipids	1			99.4	62.3	358	162.8	131.4	288.9	0.61	0.47	1.24	0.47	-0.3708	0	0	0.1359	0.00394	1	0	0	0	#N/A	-0.5546	0	2.17	1.189
Tb927.10.15080	WDR1	Ubiquitin.proteasome	1			77.6	38.8	285.4	166.5	135.2	245.9	0.47	0.29	1.16	0.29	-0.6439	0	0	-0.3058	1.31e-10	1	0	0	0	#N/A	-0.3956	0	2.17	1.1699
Tb927.6.1910	hypothetical protein, conserved	ZUnknown	1			26.7	17.2	45.2	33.2	38.3	40.7	0.8	0.45	1.11	0.45	-0.3462	0	0	-0.0847	0.326	0	0	0	0	#N/A	-0.231	0	2.17	1.1827
Tb927.11.11810	hypothetical protein, conserved	ZUnknown	1			43.8	21	132	42.7	57.9	101.9	1.03	0.36	1.3	0.36	-0.1574	0	0	-0.269	1.91e-06	1	0	0	0	#N/A	-0.4128	0	2.17	1.2079
Tb927.5.2420	NOL1/NOP2/sun family, putative	ZUnknown	1			62.6	35	104.1	78.1	83.1	107.5	0.8	0.42	0.97	0.42	-0.454	0	0	-0.3023	1.29e-06	1	0	0	0	#N/A	-0.0159	0	2.17	1.2449
Tb927.9.8760	hypothetical protein, conserved, related to a yeast GPI-anchored protein	ZUnknown	1			41.2	25.5	308.9	75.3	66.3	194.5	0.55	0.38	1.59	0.38	-0.2515	0	0	-0.0249	0.669	0	0	0	0	#N/A	-0.1082	0	2.17	1.275
Tb927.4.2200	Sec7 domain containing protein, putative	ZUnknown	1.12			82.6	43	387.7	121.6	126.5	187.1	0.68	0.34	2.07	0.34	0.0426	0	0	-0.097	0.0558	0	0	0	0	#N/A	-0.2361	0	2.17	1.3045
Tb927.8.5910	hypothetical protein	ZUnknown	1			33.2	37.7	63.3	25.9	32.4	51.7	1.28	1.16	1.22	1.16	0.2869	0	0	0.5711	1.14e-13	1	0	0	0	#N/A	-0.412	0	2.17	1.373
Tb927.10.10740	hypothetical protein, conserved	ZUnknown	1			19.9	18.9	111.3	19.1	23.7	47.7	1.04	0.8	2.33	0.8	0.4751	0	0	0.1162	0.131	0	0	0	0	#N/A	-0.4372	0	2.17	1.6276
Tb927.10.2880	FAZ26 calcium channel protein, putative	Cytoskeleton	1	8959	28	246.6	80.8	517.4	473.1	424	926.2	0.52	0.19	0.56	0.19	-1.2401	0	0	-0.105	0.00834	1	0	0	0	1.01	-0.1549	0	2.16	1.189
Tb927.4.4880	RING-variant domain containing protein, putative	ZUnknown	1	5261	1027	64.8	29.9	72.8	75.9	83.8	119.8	0.85	0.36	0.61	0.36	-0.721	0	0	-0.3207	1.17e-06	1	0	0	0	1.09	-0.3177	0	2.16	1.3045
Tb927.10.2900	importin beta-1 subunit, putative	Nuclear.transport	1.5	4834	1829	209.6	216.1	701	172.8	108	268.1	1.21	2	2.61	1.21	0.9561	0	0	-1.0225	4.08e-115	1	0	0	1	1.04	-0.5226	0	2.16	1.3219
Tb927.8.4840	Trypanosome-specific kinesin family 1	Cytoskeleton	1	3705	616	49.3	50.1	124.1	58.8	85.1	111.4	0.84	0.59	1.11	0.59	-0.2401	0	0	0.1266	0.033	1	0	0	0	1.07	-0.52	0	2.16	1.2928
Tb927.8.1740	TIM62	Mito.biogenesis	1	2745	826	84.8	102.6	226.8	128.8	86.2	118.4	0.66	1.19	1.92	0.66	0.3296	0	0	-0.1841	0.0123	1	0	0	0	1.18	-0.2489	0	2.16	1.1635
Tb927.11.14730	Metalloprotease M41 FtsH, putative	Protease	1	2692	620	207.4	152.7	136.7	249.2	177.5	157.9	0.83	0.86	0.87	0.83	-0.2288	0	0	0.2191	3.09e-05	1	0	0	0	1.21	-0.1685	0	2.16	1.263
Tb927.11.11440	A/G-specific adenine glycosylase, putative	DNA	1	2114	88	21.8	13.1	50.3	25.4	30.1	37.2	0.86	0.44	1.35	0.44	-0.179	0	0	0.1334	0.126	0	0	0	0	1.2	-0.136	0	2.16	1.3448
Tb927.2.2910	hypothetical protein, conserved	ZUnknown	1	1824	393	131	220.6	166.6	90.2	83.5	51.7	1.45	2.64	3.22	1.45	1.2849	0	0	-0.1052	0.208	0	0	0	0	1.28	-0.1671	0	2.16	1.1699
Tb927.4.3360	hypothetical protein, conserved	ZUnknown	1	1625	206	32	30.9	68.8	45.1	51.9	46.3	0.71	0.6	1.49	0.6	-0.0995	0	0	0.153	0.0542	0	0	0	0	1.11	-0.2142	0	2.16	1.4542
Tb927.10.12810	cholinephosphate cytidylyltransferase A, putative	Lipids	1	1621	89	330.6	452.8	423.6	365.9	207.5	192.6	0.9	2.18	2.2	0.9	0.8156	0	0	0.2866	1.68e-07	1	0	0	0	0.93	-0.1742	0	2.16	1.2141
Tb927.3.2400	palmitoyl acyltransferase 10, putative	Lipids	1	1258	244	77.4	93.4	90.4	73.1	37.9	45.5	1.06	2.46	1.99	1.06	0.8771	0	0	0.4843	5.62e-08	1	0	0	0	1.16	-0.1672	0	2.16	1.257
Tb927.9.12960	transporter, putative	Transporter	1			137.8	97.9	198.1	149.7	127.8	159.3	0.92	0.77	1.24	0.77	-0.0341	0	0	0.1298	0.0735	0	0	0	0	#N/A	0.2361	0	2.16	1.3448
Tb927.10.14430	hypothetical protein, conserved	ZUnknown	1			190.3	110.7	274.1	243.1	209.8	257.3	0.78	0.53	1.07	0.53	-0.334	0	0	0.2097	3.42e-05	1	0	0	0	#N/A	-0.2183	0	2.16	1.1953
Tb927.6.910	SET domain containing protein, putative	ZUnknown	1.27			34.3	30.1	82.9	60.7	48.5	64.8	0.57	0.62	1.28	0.57	-0.2805	0	0	-0.0539	0.445	0	0	0	0	#N/A	-0.212	0	2.16	1.281
Tb927.1.3880	Fusaric acid resistance protein-like, putative	ZUnknown	1			69.9	45.5	483.6	103	118.1	274.6	0.68	0.39	1.76	0.39	-0.0842	0	0	0.185	4.5e-05	1	0	0	0	#N/A	-0.3504	0	2.16	1.3103
Tb927.3.1660	hypothetical protein, conserved	ZUnknown	1			131	164.5	608.1	139.3	87.2	112.1	0.94	1.89	5.42	0.94	1.4594	0	0	-0.0766	0.197	0	0	0	0	#N/A	2.9903	0	2.16	1.3161
Tb927.7.2660	ZC3H20	RNA.binding	1.11	6611	5150	80.4	150.9	870.4	44	82.9	106.1	1.83	1.82	8.2	1.82	1.9819	0	0	-0.0935	0.25	0	0	0	0	0.95	-0.2899	0	2.15	1.3103
Tb927.7.6480	hypothetical protein, conserved	ZUnknown	1	3871	733	14.7	7.2	73.5	23.6	29.6	60.3	0.62	0.24	1.22	0.24	-0.5284	0	0	0.05	0.551	0	0	0	0	1.14	-0.3593	0	2.15	1.2327
Tb927.6.1070	hypothetical protein, conserved	ZUnknown	1	3617	910	61.7	34.4	122.7	67.8	64.2	98.8	0.91	0.54	1.24	0.54	-0.1574	0	0	0.1378	0.033	1	0	0	0	1.03	-0.0272	0	2.15	1.1635
Tb927.10.350	BBP59	Cytoskeleton	1.89	3551	1674	74	45	131.4	48.5	31.6	49.5	1.53	1.42	2.65	1.42	0.9005	0	0	0.1729	0.0339	1	0	0	0	1.22	0.4252	0	2.15	1.2079
Tb927.11.11410	trans-sialidase, putative	Membrane.protein	1	3010	809	34.2	15.6	139.9	24.8	36.6	65.4	1.38	0.43	2.14	0.43	0.3969	0	0	-0.2999	0.00175	1	0	0	0	1.01	0.1291	0	2.15	1.3896
Tb927.11.5870	hypothetical protein, conserved	ZUnknown	1	2220	724	29.2	17.6	53.1	22.3	22.1	36.1	1.31	0.8	1.47	0.8	0.255	0	0	-0.1854	0.065	0	0	0	0	0.97	-0.1697	0	2.15	1.1953
Tb927.11.9200	methyltransferase domain containing protein, putative	ZUnknown	1	1930	166	19.8	8.2	58.1	30.9	24.9	45.4	0.64	0.33	1.28	0.33	-0.415	0	0	-0.448	5.4e-10	1	0	0	0	1.09	-0.2435	0	2.15	1.1043
Tb927.10.5220	hypothetical protein, possible component of cytochorome oxidase complex	Mito.e.transport	2.06	1609	184	155.2	178.2	134.2	139	67.4	55.7	1.12	2.64	2.41	1.12	1.0403	0	0	0.1466	0.0983	0	0	0	0	0.88	-0.547	0	2.15	1.2869
Tb927.8.7810	hypothetical protein, conserved	ZUnknown	1	1551	452	65.8	115.6	74.1	60.5	40.4	20.4	1.09	2.86	3.63	1.09	1.3372	0	0	-1.2086	2.37e-18	1	0	0	1	1.1	-0.348	0	2.15	1.2449
Tb927.6.740	ATP-dependent DEAD/H RNA helicase, putative, no clear yeast homologue, DRBD3 interaction	RNA.helicase	1			156.7	53.7	332.9	155.6	124.2	257.1	1.01	0.43	1.29	0.43	-0.1361	0	0	-0.0826	0.097	0	0	0	0	#N/A	-0.1831	0	2.15	1.3161
Tb927.11.6840	Golgin	Vesicular.transport	1			21.8	15.7	54.5	27.5	48.8	72.5	0.79	0.32	0.75	0.32	-0.6897	0	0	-0.0971	0.172	0	0	0	0	#N/A	-0.2004	0	2.15	1.2265
Tb927.10.8810	hypothetical protein, conserved	ZUnknown	1			22	19	56.1	31.3	40.2	65.1	0.7	0.47	0.86	0.47	-0.5635	0	0	0.1163	0.0908	0	0	0	0	#N/A	0.0132	0	2.15	1.2203
Tb927.6.2560	hypothetical protein, conserved	ZUnknown	1			183.7	226	109	137.2	112.8	104.4	1.34	2	1.04	1.04	0.546	0	0	0.1415	0.0817	0	0	0	0	#N/A	0.1191	0	2.15	1.373
Tb06.3A7.270	hypothetical protein, conserved	ZUnknown	1			22.9	22.3	164	45.9	67.2	116.1	0.5	0.33	1.41	0.33	-0.4215	0	0	0.0696	0.245	0	0	0	0	#N/A	0.0089	0	2.15	1.4854
Tb927.10.10680	hypothetical protein, conserved	ZUnknown	1.18			38.4	20.7	220.3	41.2	51.6	81.2	0.93	0.4	2.71	0.4	0.4294	0	0	-0.0857	0.223	0	0	0	0	#N/A	-0.2982	0	2.15	1.541
Tb927.11.1070	glycosomal transporter (GAT3)	Glycosome	1	3176	1082	265.8	172.8	312.8	409.4	263.4	283.9	0.65	0.66	1.1	0.65	-0.3159	0	0	-0.0573	0.247	0	0	0	0	1.44	0.0274	0	2.14	1.1699
Tb927.5.1560	ATP-dependent DEAD/H RNA helicase, putative, no clear yeast homologue	RNA.helicase	1	2596	226	43.2	16.7	72.5	63.3	43.1	56.2	0.68	0.39	1.29	0.39	-0.3462	0	0	-0.5034	3.3e-15	1	0	0	0	1.04	-0.0482	0	2.14	1.269
Tb927.8.7290	Regulator of chromosome condensation (RCC1) repeat, putative	ZUnknown	1	2507	881	14.4	8.1	61.2	16	11.6	28.6	0.9	0.7	2.14	0.7	0.3181	0	0	-0.0554	0.634	0	0	0	0	1.12	-0.5402	0	2.14	1.4906
Tb927.10.4100	hypothetical protein, conserved	ZUnknown	1.04	2459	301	22.4	17.2	82.5	30.5	30.8	57.5	0.73	0.56	1.43	0.56	-0.1414	0	0	0.0581	0.45	0	0	0	0	1.11	-0.1813	0	2.14	1.2079
Tb927.11.4570	Ras-related protein Rab5B	Vesicular.transport	1	2054	1059	107	234.2	234.4	61	46.1	41.5	1.75	5.08	5.65	1.75	2.0566	0	0	0.349	2.62e-06	1	0	0	0	1.15	-0.0214	0	2.14	1.3896
Tb927.7.2230	mitochondrial carrier protein, putative	Mito.transport	2.04	1898	537	244.1	482.2	293.8	126.5	87	83.8	1.93	5.54	3.51	1.93	1.8718	0	0	-0.4869	2.91e-15	1	0	0	0	1.22	0.008	0	2.14	1.2016
Tb927.6.4150	hypothetical protein, conserved, tryp specific	ZUnknown	1	1881	1208	68.7	69.1	49.4	54.6	30.8	18.3	1.26	2.24	2.7	1.26	1.0473	0	0	-0.2173	0.0651	0	0	0	0	1.01	0.8115	0	2.14	1.3896
Tb927.9.9030	hypothetical protein, conserved	ZUnknown	1	1762	537	57.6	53.7	77.2	67.9	82.3	68.3	0.85	0.65	1.13	0.65	-0.1899	0	0	-0.6787	2.83e-20	1	0	0	1	0.93	-0.0865	0	2.14	1.2388
Tb927.7.2130	Uncharacterized conserved protein (DUF2036), putative	ZUnknown	2.76	1599	131	97.9	58.8	102.8	115.7	72.4	84.6	0.85	0.81	1.22	0.81	-0.0589	0	0	-0.7899	7.92e-32	1	0	0	1	1.17	-0.2112	0	2.14	1.2388
Tb927.6.3270	hypothetical protein, conserved	ZUnknown	1	1398	631	77.7	163.2	59.8	40.7	25.2	17.7	1.91	6.48	3.38	1.91	1.9721	0	0	0.2161	0.0402	1	0	0	0	1.03	0.1811	0	2.14	1.1635
Tb927.5.1590	hypothetical protein, conserved	ZUnknown	1	984	153	113	105.3	96.4	64.5	44.8	38.3	1.75	2.35	2.52	1.75	1.1419	0	0	0.2513	0.016	1	0	0	0	1.01	0.089	0	2.14	1.263
Tb927.11.1290	hypothetical protein, conserved	Mito.pathway	1			74	67	84.6	36.6	44.9	61.4	2.02	1.49	1.38	1.38	0.7049	0	0	-0.6816	3.09e-20	1	0	0	1	#N/A	-0.083	0	2.14	1.1309
Tb927.7.780	RNA pseudouridylate synthase, putative	ZUnknown	1			55.9	48	91.1	47.7	46.2	65	1.17	1.04	1.4	1.04	0.267	0	0	-0.1958	0.00922	1	0	0	0	#N/A	-0.1793	0	2.14	1.1375
Tb927.2.4950	hypothetical protein, conserved	ZUnknown	1			26.6	12.9	183.2	36.7	34	80.5	0.72	0.38	2.28	0.38	0.1721	0	0	0.0054	0.945	0	0	0	0	#N/A	-0.1722	0	2.14	1.4114
Tb927.6.650	hypothetical protein, conserved	ZUnknown	1	6653	1914	88.6	90.7	551	119.2	119.2	247.8	0.74	0.76	2.22	0.74	0.3103	0	0	-0.0379	0.461	0	0	0	0	1.09	-0.2015	0	2.13	1.2079
Tb927.1.4520	Zinc finger, C3HC4 type (RING finger), putative	Zinc.finger	1	4697	1966	100.4	71.2	113.1	71.9	85	102.5	1.4	0.84	1.1	0.84	0.1549	0	0	-0.1344	0.0415	1	0	0	0	1.03	-0.0768	0	2.13	1.144
Tb927.11.14630	ATP-dependent DEAD/H RNA helicase, putative, no clear yeast homologue	RNA.helicase	1	4322	193	60.3	60	320	69.5	71.4	190.4	0.87	0.84	1.68	0.84	0.1763	0	0	0.3979	2.89e-14	1	0	0	0	1.09	-0.2148	0	2.13	1.3505
Tb927.10.12180	hypothetical protein, conserved	ZUnknown	1	2699	517	43.4	42.3	133.5	35.1	36.9	72.3	1.24	1.15	1.85	1.15	0.4991	0	0	0.176	0.00743	1	0	0	0	1.13	-0.2169	0	2.13	1.1953
Tb927.10.3770	hypothetical protein, conserved,predicted TPR repeat protein	Mito.pathway	1	2549	364	115.8	93.9	132.1	111.6	63.1	68	1.04	1.49	1.94	1.04	0.5753	0	0	0.0453	0.517	0	0	0	0	1.11	-0.0784	0	2.13	1.144
Tb927.6.3230	RNA pseudouridylate synthase, putative	rRNA.tRNA.process	1	1722	303	78.6	72.2	116.7	68.9	54.7	68.4	1.14	1.32	1.71	1.14	0.4751	0	0	0.1974	0.0136	1	0	0	0	0.98	-0.2447	0	2.13	1.2141
Tb927.6.1960	glycosyltransferase family 28 protein, putative	Glycans	1	1559	300	46.6	38.5	78	46	50.4	62.1	1.01	0.76	1.26	0.76	0.0144	0	0	0.0633	0.423	0	0	0	0	1.02	-0.1859	0	2.13	1.2928
Tb927.11.10890	hypothetical protein, conserved	ZUnknown	1	1413	93	47.9	34.6	47.7	64.6	49.8	52.8	0.74	0.69	0.9	0.69	-0.3646	0	0	0.3577	6.6e-07	1	0	0	0	1.07	-0.2101	0	2.13	1.2327
Tb927.9.6710	flavoprotein monooxygenase, putative	Mito.pathway	1			34.1	29.8	98.5	48.3	50.9	78	0.71	0.59	1.26	0.59	-0.2288	0	0	-0.0936	0.217	0	0	0	0	#N/A	-0.1449	0	2.13	1.2869
Tb927.10.6300	Mitochondrial ribosomal protein S5	Mito.translation	1.99			20.3	10.8	54	14.7	22.4	34.9	1.38	0.48	1.55	0.48	0.1848	0	0	0.1645	0.0611	0	0	0	0	#N/A	-0.2095	0	2.13	1.2265
Tb927.3.4550	KRIPP6/TbPPR6 Kinetoplast ribosomal PPR-repeat containing protein	Mito.translation	1			31.2	24.8	80	42.1	47.7	59	0.74	0.52	1.36	0.52	-0.1954	0	0	0.0894	0.238	0	0	0	0	#N/A	-0.1612	0	2.13	1.3785
Tb927.6.3440	hypothetical protein, conserved	ZUnknown	1			41.7	24.1	30.4	33	32.9	26	1.26	0.73	1.17	0.73	0.075	0	0	-0.2262	0.021	1	0	0	0	#N/A	-0.1892	0	2.13	1.251
Tb927.11.13000	phospholipid-transporting ATPase; flippase	Lipids	1	5696	298	76.3	46	287.4	176.5	240.2	371.8	0.43	0.19	0.77	0.19	-1.1099	0	0	0.1456	0.00468	1	0	0	0	1.15	-0.3661	0	2.12	1.1827
Tb927.9.7540	calpain-like cysteine peptidase, putative,cysteine peptidase, Clan CA, family C2, putative	Protease	1	4958	2226	95.7	78.1	395.6	72.8	74.6	102.9	1.31	1.05	3.84	1.05	1.0473	0	0	-0.4396	1.33e-15	1	0	0	0	1.4	-0.4635	0	2.12	1.2987
Tb927.10.9890	hypothetical protein, conserved, no domains	ZUnknown	1.31	3678	52	76.6	36.8	189.5	103	87	159.8	0.74	0.42	1.19	0.42	-0.3523	0	0	0.1449	0.00441	1	0	0	0	1.06	-0.305	0	2.12	1.1635
Tb927.8.1260	NOP112	Cell.cycle	1.83	3492	359	26	12.7	84.7	44.1	40.9	64.1	0.59	0.31	1.32	0.31	-0.4344	0	0	-0.295	9.92e-07	1	0	0	0	1.08	-0.2532	0	2.12	1.144
Tb927.11.16650	hypothetical protein, conserved	ZUnknown	1	3097	1046	59	48.4	170	47.2	44.1	73.9	1.25	1.1	2.3	1.1	0.6323	0	0	0.2585	0.000103	1	0	0	0	0.96	0.3449	0	2.12	1.3785
Tb927.5.4040	Mitochondrial SSU ribosomal protein, putative	Mito.translation	1	2870	348	49	32	144.2	47	60.2	122.7	1.04	0.53	1.18	0.53	-0.1255	0	0	0.3129	7.92e-09	1	0	0	0	1.11	-0.1579	0	2.12	1.275
Tb927.11.8980	EFG2 elongation factor G2-like protein	Translation	1	2558	88	26.4	17.6	113.6	38.5	33.6	58.2	0.69	0.52	1.95	0.52	0.075	0	0	0.1641	0.0177	1	0	0	0	1.03	-0.1648	0	2.12	1.4222
Tb927.6.1850	quiescin sulfhydryl oxidase (QSOX)	Enzyme	1	1931	349	155.5	78.8	104.2	126.5	88.5	89.6	1.23	0.89	1.16	0.89	0.1287	0	0	0.1588	0.0171	1	0	0	0	1.04	-0.0638	0	2.12	1.1827
Tb927.11.10360	hypothetical protein, conserved	ZUnknown	1	1719	259	39.4	23.9	95.4	36.3	42.2	52.9	1.09	0.57	1.8	0.57	0.2058	0	0	0.1535	0.0581	0	0	0	0	1.34	-0.082	0	2.12	1.3674
Tb927.11.6150	60Kd inner membrane protein, putative	ZUnknown	1	1644	351	33.3	14.6	48.2	44.8	22.8	34.4	0.74	0.64	1.4	0.64	-0.1099	0	0	-0.3903	6.44e-05	1	0	0	0	0.98	-0.2191	0	2.12	1.251
Tb927.11.4250	hypothetical protein, conserved	ZUnknown	1	1134	391	23.4	19.9	22.5	23.3	29.9	23.9	1	0.67	0.94	0.67	-0.2009	0	0	0.1815	0.105	0	0	0	0	1.05	-0.114	0	2.12	1.1506
Tb927.10.15910	glycerol uptake protein, putative	Glucose.glycerol	2.15			317.2	213.5	233.8	404.3	306	233.7	0.78	0.7	1	0.7	-0.2746	0	0	-1.071	1.79e-97	1	0	0	1	#N/A	-0.207	0	2.12	1.1309
Tb927.11.13100	hypothetical protein, conserved	ZUnknown	1			47.1	104.4	92.6	35.3	49.9	42.3	1.33	2.09	2.19	1.33	0.903	0	0	0.0042	0.972	0	0	0	0	#N/A	-0.3065	0	2.12	1.1635
Tb927.11.16340	Importin-beta N-terminal domain/HEAT-like repeat, putative	ZUnknown	1			113.4	55.9	315.5	164.8	140	241.7	0.69	0.4	1.31	0.4	-0.3219	0	0	-0.2529	2.44e-07	1	0	0	0	#N/A	-0.3312	0	2.12	1.2203
Tb927.10.2590	methyltransferase domain containing protein, putative	ZUnknown	1.8			45.9	23.2	129	61.5	32.1	56.4	0.75	0.72	2.29	0.72	0.3258	0	0	-0.1343	0.0714	0	0	0	0	#N/A	-0.404	0	2.12	1.257
Tb927.6.3010	PH domain containing protein, putative	ZUnknown	1.78			52	43.1	115.7	47.2	39.5	63.1	1.1	1.09	1.83	1.09	0.4222	0	0	0.2456	0.000234	1	0	0	0	#N/A	-0.1647	0	2.12	1.3103
Tb927.9.2060	ADP-ribosylation factor family, putative	ZUnknown	1			67.3	60.7	59.3	50.1	49.9	46.7	1.34	1.22	1.27	1.22	0.3524	0	0	0.1226	0.184	0	0	0	0	#N/A	-0.0937	0	2.12	1.3277
Tb927.10.4030	hypothetical protein	ZUnknown	1			21.5	23.9	56.3	17.1	15.7	17.8	1.26	1.52	3.16	1.26	0.9855	0	0	0.31	0.00247	1	0	0	0	#N/A	-0.4267	0	2.12	1.406
Tb927.11.5490	synaptojanin (N-terminal domain), putative	Vesicular.transport	1	4930	213	63.3	24.3	200.4	82.9	63.9	144.9	0.76	0.38	1.38	0.38	-0.2515	0	0	0.0475	0.456	0	0	0	0	1.07	-0.1961	0	2.11	1.2388
Tb927.7.4150	hypothetical protein, conserved	ZUnknown	1	4716	921	70.8	38.1	214.4	76.9	87.1	162	0.92	0.44	1.32	0.44	-0.1627	0	0	-0.0093	0.889	0	0	0	0	1.08	-0.2401	0	2.11	1.2388
Tb927.6.3220	hypothetical protein, conserved, no domains, no yeast or human match	Cytoskeleton	1.5	3755	443	83.2	53.7	155.5	104.8	70.5	118.6	0.79	0.76	1.31	0.76	-0.0689	0	0	0.095	0.0988	0	0	0	0	0.9	-0.4801	0	2.11	1.2079
Tb927.9.6310	ABC transporter, putative	Transporter	1	3710	1617	141.9	65.2	251.3	141.2	80.3	133.4	1	0.81	1.88	0.81	0.2987	0	0	0.2319	2.1e-05	1	0	0	0	1.14	0.309	0	2.11	1.269
Tb927.3.920	hypothetical protein, conserved	ZUnknown	1	3701	207	43.7	45.6	197.5	73.1	91	138.9	0.6	0.5	1.42	0.5	-0.2515	0	0	0.1705	0.00415	1	0	0	0	1.2	-0.3012	0	2.11	1.2388
Tb927.10.5820	predicted RanGDP binding protein	Zinc.finger	1.07	3436	403	83.8	71	193.5	116.2	149.7	190.6	0.72	0.47	1.02	0.47	-0.4409	0	0	-0.3233	2.17e-10	1	0	0	0	1.07	-0.0795	0	2.11	1.2327
Tb927.11.14240	CAP116 Clathrin-associated protein	Vesicular.transport	1.04	3293	226	47.6	54.3	128.4	52.7	52.6	66.2	0.9	1.03	1.94	0.9	0.3674	0	0	0.1657	0.0154	1	0	0	0	0.96	-0.2522	0	2.11	1.4114
Tb927.8.5650	conserved, found in PRP19 pull-down	RNA.processing	1	3037	196	45.7	42.2	241.4	63.7	98.8	170.2	0.72	0.43	1.42	0.43	-0.2232	0	0	0.0142	0.836	0	0	0	0	1.08	-0.1199	0	2.11	1.1763
Tb927.9.15450	Domain of unknown function (DUF4205), putative	ZUnknown	1	2816	544	31.6	13	43.3	28.5	34.6	57.5	1.11	0.38	0.75	0.38	-0.4215	0	0	0.1435	0.0266	1	0	0	0	1.02	0.1435	0	2.11	1.1375
Tb927.10.10990	predicted WD40 repeat protein	ZUnknown	1	2353	560	101.4	53.3	73.2	80	89	104.7	1.27	0.6	0.7	0.6	-0.2232	0	0	0.075	0.308	0	0	0	0	1.17	-0.4896	0	2.11	1.1243
Tb927.10.1940	serine/threonine-protein kinase, putative	Protein.kinase	2.03	1331	121	19.2	20.3	63.6	29.4	32.3	31.4	0.65	0.63	2.03	0.63	0.1419	0	0	-0.1639	0.0558	0	0	0	0	1.24	0.0935	0	2.11	1.3561
Tb927.10.16030	MAPK2 protein kinase	Protein.kinase	1.16	1201	43	57.1	30.1	63.6	57.7	31.9	38.4	0.99	0.94	1.66	0.94	0.259	0	0	0.0398	0.702	0	0	0	0	1.08	-0.1899	0	2.11	1.257
Tb927.7.4880	hypothetical protein, conserved	ZUnknown	2	1048	288	24.1	26	53.1	35.4	62.3	47.3	0.68	0.42	1.12	0.42	-0.4344	0	0	0.0334	0.792	0	0	0	0	0.89	0.058	0	2.11	1.1699
Tb927.10.5100	hypothetical protein	ZUnknown	1	647	135	297.6	385.8	157	149.9	61.4	31.4	1.99	6.28	5	1.99	2.1451	0	0	-0.8661	1.28e-12	1	0	0	1	0.98	0.7259	0	2.11	1.3103
Tb927.11.9290	FAZ20 protein tyrosine kinase, putative	Cytoskeleton	1			62.2	58.7	233.8	77.1	51.4	86.3	0.81	1.14	2.71	0.81	0.6354	0	0	-0.1925	0.00216	1	0	0	0	#N/A	0.6654	0	2.11	1.3505
Tb927.11.16630	major facilitator superfamily, putative	ZUnknown	1			209.9	111.6	141.8	254.4	160.1	156.8	0.83	0.7	0.9	0.7	-0.304	0	0	-0.2152	7.24e-05	1	0	0	0	#N/A	0.0283	0	2.11	1.1506
Tb927.11.16330	hypothetical protein, conserved	ZUnknown	1			64.4	33.6	164.3	59.2	68	104.3	1.09	0.49	1.58	0.49	0.075	0	0	0.1433	0.0438	1	0	0	0	#N/A	-0.2945	0	2.11	1.2079
Tb927.10.13090	PhoD-like phosphatase, putative	ZUnknown	1			143.2	98.8	222.9	123.7	150.7	171.6	1.16	0.66	1.3	0.66	0.0566	0	0	0.4771	1.49e-17	1	0	0	0	#N/A	-0.2591	0	2.11	1.2265
Tb927.9.13470	hypothetical protein, conserved	ZUnknown	1			40.2	32	138.8	45	64.5	107.2	0.89	0.5	1.29	0.5	-0.1627	0	0	0.0126	0.867	0	0	0	0	#N/A	-0.1671	0	2.11	1.257
Tb927.11.10970	RWD domain/Uncharacterized protein family UPF0029, putative	ZUnknown	1			25.9	20	71	34.6	39	52.6	0.75	0.51	1.35	0.51	-0.2009	0	0	0.0848	0.386	0	0	0	0	#N/A	-0.2383	0	2.11	1.281
Tb927.7.560	hypothetical protein, conserved	ZUnknown	1			62.1	37.3	81.5	63.6	53.3	66.9	0.98	0.7	1.22	0.7	-0.0489	0	0	-0.1111	0.129	0	0	0	0	#N/A	-0.0094	0	2.11	1.2869
Tb927.11.10390	hypothetical protein, conserved	ZUnknown	1			17.7	11.8	97	22.9	30.4	50.5	0.77	0.39	1.92	0.39	0.038	0	0	-0.1074	0.133	0	0	0	0	#N/A	-0.2744	0	2.11	1.3045
Tb927.8.4660	hypothetical protein, conserved	ZUnknown	1.45			45.8	22.2	217.8	76.2	60	111.7	0.6	0.37	1.95	0.37	-0.039	0	0	-0.0143	0.84	0	0	0	0	#N/A	-0.1281	0	2.11	1.4222
Tb927.11.4950	hypothetical protein, conserved	ZUnknown	1	5937	3559	111.3	190.3	303.9	135.7	111.8	118.7	0.82	1.7	2.56	0.82	0.7599	0	0	0.2784	2.23e-08	1	0	0	0	1.37	-0.0298	0	2.1	1.1375
Tb927.4.3120	hook complex protein, conserved	Cytoskeleton	1.92	3734	698	28.9	25.6	60	23.1	50.7	80.8	1.25	0.5	0.74	0.5	-0.2688	0	0	-0.6731	1.64e-28	1	0	0	1	1.14	-0.6754	1	2.1	1.1309
Tb927.3.2060	protein kinase, putative	Protein.kinase	1	2930	1303	44.7	42.8	152.4	19.7	28.6	55.7	2.27	1.5	2.74	1.5	1.1177	0	0	-0.1237	0.105	0	0	0	0	1.01	-0.2683	0	2.1	1.3618
Tb927.10.12130	Ubiquitin family, putative	ZUnknown	1.43	2703	329	50	30.5	84.1	66.9	57.6	71.9	0.75	0.53	1.17	0.53	-0.2922	0	0	-0.0713	0.361	0	0	0	0	1.07	-0.2164	0	2.1	1.0909
Tb927.11.6760	leucine-rich repeat protein (LRRP)	LRRP	1	2353	511	37.8	29.4	115.3	33.6	43.2	66.6	1.13	0.68	1.73	0.68	0.2388	0	0	0.1447	0.0447	1	0	0	0	1.08	-0.373	0	2.1	1.2016
Tb927.10.5870	FAZ25	Cytoskeleton	1	2173	797	62.8	67.6	137	34.2	25.6	44.1	1.84	2.64	3.11	1.84	1.3391	0	0	-0.0251	0.802	0	0	0	0	1.04	-0.5814	0	2.1	1.1827
Tb927.10.7270	hypothetical protein, conserved	ZUnknown	1	2075	282	67.4	140.7	116.7	50.4	60.4	74	1.34	2.33	1.58	1.34	0.8074	0	0	0.1007	0.207	0	0	0	0	1.17	-0.0977	0	2.1	1.2327
Tb927.6.1740	Sad1 / UNC-like C-terminal, putative	ZUnknown	1	1821	227	232.4	218.1	168.4	164.9	75.1	74.2	1.41	2.9	2.27	1.41	1.1331	0	0	-0.2998	2.48e-05	1	0	0	0	0.99	0.0502	0	2.1	1.2327
Tb927.11.15530	C-14 sterol reductase, putative	Sterols	1	1795	391	72.4	55.5	101.9	61.2	31.6	33.7	1.18	1.76	3.02	1.18	0.9903	0	0	0.4334	3.3e-06	1	0	0	0	0.99	0.1785	0	2.1	1.4957
Tb927.4.1050	IP5K kinase inositol phosphate kinase	ZUnknown	1	1587	165	23.3	16.8	85.5	21.2	24.4	43.1	1.1	0.69	1.98	0.69	0.3296	0	0	0.143	0.0745	0	0	0	0	1.1	-0.1696	0	2.1	1.2869
Tb927.4.2870	hypothetical protein, conserved	ZUnknown	1	1495	562	36	32.8	52.3	34.4	40.5	48	1.05	0.81	1.09	0.81	-0.0242	0	0	-0.3587	9.9e-05	1	0	0	0	1.1	0.0089	0	2.1	1.2327
Tb927.6.1620	Zn-finger in Ran binding protein and others, putative	Zinc.finger	1	1242	248	82.1	120.2	162.2	50.7	28.8	30	1.62	4.17	5.41	1.62	1.9005	0	0	0.4489	9.22e-08	1	0	0	0	1.05	-0.1933	0	2.1	1.144
Tb927.7.1900	CRK7 cdc2- like protein kinase	Protein.kinase	1	1036	146	22.1	14.5	31.3	28	21.7	27.2	0.79	0.67	1.15	0.67	-0.2009	0	0	0.2421	0.0167	1	0	0	0	1.02	-0.2198	0	2.1	1.384
Tb927.1.3230	cell division cycle protein, putative	Cell.cycle	1			42.3	39	116.8	46.5	91.2	84.3	0.91	0.43	1.39	0.43	-0.1361	0	0	0.1704	0.0241	1	0	0	0	#N/A	-0.2625	0	2.1	1.3219
Tb927.8.2960	Probable methyltransferase BTM2 homolog	Enzyme	1			27.2	20.6	86.7	31	42.5	57.5	0.88	0.48	1.51	0.48	-0.0639	0	0	0	1	0	0	0	0	#N/A	-0.2366	0	2.1	1.4436
Tb927.3.1940	hypothetical protein, possible component of cytochorome oxidase complex	Mito.e.transport	1.76			126.4	72.3	90.5	109.4	51.3	58.8	1.16	1.41	1.54	1.16	0.4542	0	0	0.0136	0.891	0	0	0	0	#N/A	-0.1921	0	2.1	1.1953
Tb927.9.2550	Domain of unknown function (DUF4457), putative	ZUnknown	1			79.5	42.8	330.3	50.2	64.7	135.3	1.58	0.66	2.44	0.66	0.6415	0	0	-0.0405	0.494	0	0	0	0	#N/A	-0.1767	0	2.1	1.0976
Tb927.10.950	hypothetical protein, conserved	ZUnknown	1.14			16.4	13.1	66.5	23.1	33.2	59.1	0.71	0.39	1.13	0.39	-0.4279	0	0	-0.0539	0.525	0	0	0	0	#N/A	-0.2561	0	2.1	1.1309
Tb927.3.5290	hypothetical protein, conserved	ZUnknown	1			67.4	34.2	136.2	63.7	72.1	112.6	1.06	0.47	1.21	0.47	-0.1308	0	0	-0.0881	0.167	0	0	0	0	#N/A	-0.1675	0	2.1	1.2016
Tb927.11.15340	hypothetical protein, conserved	ZUnknown	1			58.1	40.7	108.3	52.1	37.7	43.9	1.12	1.08	2.47	1.08	0.6385	0	0	0.2233	0.00274	1	0	0	0	#N/A	-0.1004	0	2.1	1.2203
Tb927.7.5500	hypothetical protein, conserved	ZUnknown	1			49.9	23.2	120.9	60.7	51.9	88.1	0.82	0.45	1.37	0.45	-0.1844	0	0	-0.4303	1.17e-13	1	0	0	0	#N/A	-0.3562	0	2.1	1.2449
Tb927.6.2660	hypothetical protein, conserved	ZUnknown	1			97.2	52.9	179	125.3	105	143.9	0.78	0.5	1.24	0.5	-0.2515	0	0	0.0258	0.68	0	0	0	0	#N/A	-0.1776	0	2.1	1.257
Tb927.10.720	FAX24 or CAP118 Clathrin-associated protein	Cytoskeleton	1.01	4502	747	69.2	74.9	278.8	59.7	93.3	191.5	1.16	0.8	1.46	0.8	0.189	0	0	-0.2351	7.49e-05	1	0	0	0	1.27	0.0367	0	2.09	1.1635
Tb927.10.13260	hypothetical protein, conserved	ZUnknown	1.38	4089	306	73.5	55.8	192	108	126.7	174	0.68	0.44	1.1	0.44	-0.4344	0	0	0.129	0.0261	1	0	0	0	1.02	-0.1979	0	2.09	1.2016
Tb927.3.5390	Ring finger domain containing protein, putative	ZUnknown	1	3782	2131	87.6	104.9	216.8	61.9	32.5	37.1	1.42	3.23	5.84	1.42	1.806	0	0	0.3755	1.56e-08	1	0	0	0	1.01	-0.1918	0	2.09	1.3277
Tb927.8.7760	hypothetical protein, conserved, collagen-binding domain, quite serine-rich	ZUnknown	1.03	3773	407	79.7	88.5	309.3	66.4	82.5	134.3	1.2	1.07	2.3	1.07	0.6072	0	0	0.0661	0.318	0	0	0	0	1.14	-0.0379	0	2.09	1.2141
Tb927.2.2430	CK2A2 casein kinase II	Protein.kinase	1	3502	2047	65.1	52.2	109.1	49.6	34	62	1.31	1.54	1.76	1.31	0.6198	0	0	-0.1255	0.124	0	0	0	0	1.02	-0.8911	1	2.09	1.1243
Tb927.11.5430	DNA repair and recombination protein RAD54, putative	DNA	1	3443	319	83.6	41.8	238.2	86.1	84.3	151	0.97	0.5	1.58	0.5	0.0238	0	0	0.0105	0.891	0	0	0	0	0.95	-0.3902	0	2.09	1.2928
Tb927.11.1660	vesicular transport protein (CDC48 homologue), putative	Vesicular.transport	1	2317	306	73.3	54	238.2	47.9	79.1	119.6	1.53	0.68	1.99	0.68	0.4854	0	0	-0.1375	0.0272	1	0	0	0	1.05	-0.0877	0	2.09	1.1635
Tb927.4.4300	NADH-ubiquinone oxidoreductase complex I subunit, putative	Mito.e.transport	1	2191	302	37.2	17.6	58.5	61.1	30.6	54.5	0.61	0.58	1.07	0.58	-0.4086	0	0	0.0478	0.565	0	0	0	0	1.26	-0.1449	0	2.09	1.3391
Tb927.2.4460	hypothetical protein, conserved	ZUnknown	1	1925	20	152.6	146.8	108.9	143.9	113.5	74.8	1.06	1.29	1.46	1.06	0.3448	0	0	0.0029	0.973	0	0	0	0	0.88	-0.4609	0	2.09	1.1635
Tb927.7.7360	CRK2 cdc2-related kinase	Cell.cycle	1	1557	177	74.3	41.2	98.3	64.4	71.2	88.5	1.15	0.58	1.11	0.58	-0.0791	0	0	0.0931	0.246	0	0	0	0	1.13	-0.0909	0	2.09	1.2869
Tb927.10.12080	hypothetical protein, conserved	ZUnknown	1	1460	485	101.1	301.2	109	63.4	57.6	24.7	1.59	5.23	4.41	1.59	1.9043	0	0	0.092	0.444	0	0	0	0	1.3	-0.2077	0	2.09	1.3674
Tb927.5.3580	phosphoglycerate mutase protein, putative	Glucose.glycerol	1	1036	394	23.5	9.7	31.9	21.1	11.9	20.4	1.11	0.82	1.56	0.82	0.2183	0	0	0.1145	0.268	0	0	0	0	1.04	-0.3694	0	2.09	1.275
Tb927.1.3120	separase, putative,cysteine peptidase, Clan CD, family C50, putative	DNA	1.75			36.6	26	160	66.3	69	103.7	0.55	0.38	1.54	0.38	-0.2805	0	0	0.1557	0.0122	1	0	0	0	#N/A	-0.2016	0	2.09	1.2388
Tb927.9.11750	methyltransferase domain containing protein, putative	ZUnknown	1			48.6	52.9	69.3	40.8	37.1	35.6	1.19	1.43	1.95	1.19	0.6072	0	0	0.0964	0.259	0	0	0	0	#N/A	-0.1884	0	2.09	1.2327
Tb927.10.11130	SET domain containing protein, putative	ZUnknown	1			46	26.2	155	62.6	69.1	128.7	0.73	0.38	1.2	0.38	-0.3771	0	0	0.1203	0.0384	1	0	0	0	#N/A	-0.2707	0	2.09	1.251
Tb927.8.6860	High-temperature-induced dauer-formation protein, putative	ZUnknown	1			44.3	41.7	138.6	48.3	60.2	88.3	0.92	0.69	1.57	0.69	0.0841	0	0	0.2885	2.73e-06	1	0	0	0	#N/A	-0.178	0	2.09	1.257
Tb927.4.4110	hypothetical protein, conserved	ZUnknown	1.03			41.1	32.6	102.2	45.2	42	72.5	0.91	0.78	1.41	0.78	0.0473	0	0	-0.3031	2.63e-05	1	0	0	0	#N/A	-0.2427	0	2.09	1.2869
Tb927.10.5250	ZC3H32	RNA.binding	1.97	6393	3664	101.5	86.4	502.4	140.6	73.1	149.6	0.72	1.18	3.36	0.72	0.8101	0	0	-0.0885	0.163	0	0	0	0	1.06	-0.6674	1	2.08	1.2079
Tb927.11.8820	glutathionylspermidine synthetase, putative	Redox	1	3074	897	233.1	125.7	101.2	159.4	117.7	96.4	1.46	1.07	1.05	1.05	0.255	0	0	-0.5653	4.55e-11	1	0	0	0	0.82	-0.1804	0	2.08	1.1827
Tb927.10.810	pentatricopeptide repeat domain containing protein, putative	ZUnknown	1	2877	1027	96.3	120.7	188.4	82.4	55.6	66.9	1.17	2.17	2.82	1.17	1.038	0	0	-0.1151	0.0662	0	0	0	0	1	-0.2786	0	2.08	1.1177
Tb927.8.820	VID27 cytoplasmic protein, putative	ZUnknown	1	2330	417	182.4	59.3	118.3	158.8	103.2	139.1	1.15	0.57	0.85	0.57	-0.2232	0	0	-0.5058	2.05e-17	1	0	0	0	1	-0.1856	0	2.08	1.1953
Tb927.4.4220	small GTP-binding rab protein, putative (TbRX2)	Vesicular.transport	1.03	2141	437	67.7	56.2	220.1	56.6	35.8	55	1.2	1.57	4	1.2	1.1742	0	0	0.5832	1.24e-20	1	0	0	0	0.9	1.2323	0	2.08	1.2928
Tb927.5.690	MIC17	Mito.biogenesis	1	1920	1345	16.9	13	34.5	13.8	12.6	18.9	1.22	1.03	1.83	1.03	0.4436	0	0	0.0559	0.666	0	0	0	0	0.98	0.1107	0	2.08	1.111
Tb927.9.2100	hypothetical protein, conserved	ZUnknown	1	1887	580	26.9	22.5	51.1	27.7	50.9	39.6	0.97	0.44	1.29	0.44	-0.152	0	0	0.2064	0.0226	1	0	0	0	1.24	-0.3104	0	2.08	1.1506
Tb927.5.1960	hypothetical protein, conserved, dsRNA binding domain	RNA.binding	1	1554	359	89.7	68.3	71.8	83.2	94.2	59	1.08	0.73	1.22	0.73	0.0144	0	0	-0.4193	1.9e-07	1	0	0	0	0.87	-0.2228	0	2.08	1.0635
Tb927.6.3480	importin beta subunit beta-4	RNA.binding	1.88			100.1	228.6	147.8	57.2	96	75.7	1.75	2.38	1.95	1.75	1.0191	0	0	-1.1875	3.9e-50	1	0	0	1	#N/A	0.7899	0	2.08	1.2203
Tb927.2.5750	tyrosyl-DNA Phosphodiesterase (Tdp1), putative	DNA	1			143.2	151.6	96.5	70.5	59	67.6	2.03	2.57	1.43	1.43	1.0072	0	0	0.1191	0.111	0	0	0	0	#N/A	-0.0105	0	2.08	1.144
Tb927.9.13360	ubiquitin-protein ligase, putative (upl3)	Ubiquitin.proteasome	1			197.2	236.4	1000.5	318.1	283.7	451	0.62	0.83	2.22	0.62	0.2908	0	0	0.5523	2.43e-36	1	0	0	0	#N/A	2.228	0	2.08	1.2869
Tb927.5.3650	hypothetical protein, conserved	ZUnknown	1.16			80.5	53.7	167.7	76.4	108.6	157.4	1.05	0.49	1.07	0.49	-0.2009	0	0	-0.0719	0.252	0	0	0	0	#N/A	-0.3768	0	2.08	1.0772
Tb927.10.1840	hypothetical protein, conserved	ZUnknown	1			23.4	21.1	81.3	29.1	44.6	64.1	0.8	0.47	1.27	0.47	-0.2401	0	0	-0.1301	0.0962	0	0	0	0	#N/A	-0.482	0	2.08	1.2388
Tb927.11.11260	hypothetical protein, conserved	ZUnknown	1			126.5	139.8	170.3	93.3	99.3	88	1.36	1.41	1.94	1.36	0.6508	0	0	-0.323	1.19e-06	1	0	0	0	#N/A	-0.1259	0	2.08	1.3161
Tb927.10.12320	hypothetical protein	ZUnknown	1			61.1	60.2	82.3	50	47.5	50.8	1.22	1.27	1.62	1.22	0.4542	0	0	0.2638	0.000314	1	0	0	0	#N/A	-0.1733	0	2.08	1.3951
Tb927.3.3810	Etoposide-induced protein 2.4 (EI24), putative	ZUnknown	1			59.5	79.4	100.6	30.5	30.7	32.5	1.95	2.59	3.1	1.95	1.3486	0	0	0.13	0.218	0	0	0	0	#N/A	-0.2894	0	2.08	1.4542
Tb927.10.14230	hypothetical protein, conserved, WD40 repeats	ZUnknown	1	4519	113	62.6	36.5	241.6	70.7	82.1	204.3	0.89	0.44	1.18	0.44	-0.2573	0	0	-0.008	0.898	0	0	0	0	1.13	-0.1743	0	2.07	1.0909
Tb927.3.2040	kinesin, Kinesin-16	Cytoskeleton	1	4359	916	34.6	21.2	139.7	34.5	39.2	95.2	1	0.54	1.47	0.54	0.0048	0	0	0.1582	0.00402	1	0	0	0	1.12	-0.1149	0	2.07	1.0976
Tb927.7.2350	hypothetical protein, conserved	ZUnknown	1	3780	504	102	50.9	187.2	98.5	92.5	167.2	1.04	0.55	1.12	0.55	-0.1467	0	0	-0.4032	1.35e-15	1	0	0	0	0.99	-0.2447	0	2.07	1.2388
Tb927.4.2730	Kinesin, kinesin-12	Cytoskeleton	1	3752	1293	103.7	87.4	206.2	69.1	70.7	125.9	1.5	1.24	1.64	1.24	0.546	0	0	-0.2977	1.88e-07	1	0	0	0	0.83	-0.688	1	2.07	1.1375
Tb927.7.4940	oligopeptidase B protein, clathrin-associated	Vesicular.transport	1.94	2986	255	45.7	29.3	174.5	62.5	89.1	166.1	0.73	0.33	1.05	0.33	-0.5077	0	0	-0.1145	0.0473	1	0	0	0	0.93	-0.1442	0	2.07	1.3618
Tb927.10.12520	hypothetical protein, conserved	ZUnknown	1	2880	293	60.7	41.5	107.8	68.5	100.7	133.6	0.89	0.41	0.81	0.41	-0.5077	0	0	0.2031	0.000573	1	0	0	0	0.9	0.0332	0	2.07	1.2388
Tb927.11.13350	hypothetical protein, conserved	ZUnknown	1	2851	403	50.6	46.2	72.5	47.1	72.2	71.1	1.07	0.64	1.02	0.64	-0.1361	0	0	0.2668	6.92e-05	1	0	0	0	1.12	-0.2443	0	2.07	1.1953
Tb927.7.640	hypothetical protein, conserved	Mito.pathway	1	2590	1137	37.8	23.5	38.2	38.1	35.5	42.6	0.99	0.66	0.9	0.66	-0.2345	0	0	0.1026	0.275	0	0	0	0	1.17	-0.3241	0	2.07	1.1827
Tb927.11.10960	2OG-Fe(II) oxygenase superfamily, putative	Mito.pathway	1	2449	393	40.8	17.8	111.9	41.4	46.7	98.8	0.99	0.38	1.13	0.38	-0.263	0	0	0.0633	0.369	0	0	0	0	1.04	-0.3239	0	2.07	1.2203
Tb927.11.14700	hypothetical protein, conserved	Mito.pathway	1	1814	105	61.9	28.8	42.4	88.3	47.2	40.3	0.7	0.61	1.05	0.61	-0.3462	0	0	0.0443	0.652	0	0	0	0	1.01	0.0071	0	2.07	1.2449
Tb927.11.16590	RBP37	RNA.binding	1	1716	178	15.4	12.1	53.7	18.1	20.3	37.4	0.85	0.6	1.44	0.6	-0.0539	0	0	0.1869	0.0131	1	0	0	0	1.07	-0.2328	0	2.07	1.2388
Tb927.4.2860	EAP30/Vps36 family, putative	ZUnknown	1	1279	222	38.8	42	58.1	39	37.4	45.9	0.99	1.12	1.27	0.99	0.1721	0	0	-0.3989	1.04e-05	1	0	0	0	0.92	-0.1677	0	2.07	1.2203
Tb927.8.3140	NAD dependent deacetylase, putative, SIR2RP2	Mito.pathway	1	1244	208	12.3	11.4	31	20.6	27	23.6	0.6	0.42	1.31	0.42	-0.3646	0	0	-0.0134	0.914	0	0	0	0	0.99	-0.2046	0	2.07	1.2928
Tb927.1.1100	BBP109	Cytoskeleton	1.16			34.1	17	72.4	36.3	42.9	75.6	0.94	0.4	0.96	0.4	-0.3833	0	0	-0.0649	0.364	0	0	0	0	#N/A	-0.2221	0	2.07	1.0704
Tb927.10.5210	TFIIH basal transcription factor subunit (p52)	RNA.synthesis	2.03			57.3	32.1	78.5	40.6	42	56.7	1.41	0.76	1.38	0.76	0.2429	0	0	-0.1408	0.106	0	0	0	0	#N/A	-0.0412	0	2.07	1.1375
Tb927.10.15680	hypothetical protein, conserved	ZUnknown	2.13			156.6	80.4	773.6	304.2	338.3	702.8	0.51	0.24	1.1	0.24	-0.6974	0	0	-0.2206	9.46e-08	1	0	0	0	#N/A	-0.2148	0	2.07	1.1309
Tb927.10.4470	hypothetical protein, conserved	ZUnknown	2.21			113.6	79.7	218.1	175	156.1	182.7	0.65	0.51	1.19	0.51	-0.3523	0	0	0.0601	0.318	0	0	0	0	#N/A	-0.3083	0	2.07	1.1375
Tb927.10.11010	hypothetical protein, conserved	ZUnknown	1			45.3	31.5	58.8	31.2	44.8	47.1	1.45	0.7	1.25	0.7	0.1806	0	0	0.3062	0.000378	1	0	0	0	#N/A	-0.0647	0	2.07	1.2327
Tb927.10.3970	hypothetical protein, conserved	ZUnknown	1.21	6288	1234	80.1	41.2	82	54.8	40.1	62.6	1.46	1.03	1.31	1.03	0.341	0	0	0.2128	0.018	1	0	0	0	1.04	-0.2827	0	2.06	1.1635
Tb927.11.7860	DNA replication licensing factor MCM2	DNA	1	4179	1268	75.3	42.5	175.6	82.7	62.6	99.3	0.91	0.68	1.77	0.68	0.1635	0	0	0.0786	0.206	0	0	0	0	1.09	0.102	0	2.06	1.144
Tb927.10.13800	hypothetical protein, conserved, no yeast or human match	Cytoskeleton	1.14	3939	2603	90.6	89.7	172.1	78	92.8	105	1.16	0.97	1.64	0.97	0.3296	0	0	-0.3668	8.69e-11	1	0	0	0	1.28	-0.179	0	2.06	1.275
Tb927.11.930	hypothetical protein, conserved	ZUnknown	1	3261	952	71.3	70.1	196.6	66.5	45.1	60.1	1.07	1.55	3.27	1.07	0.9733	0	0	0.1741	0.00833	1	0	0	0	1.04	-0.5235	0	2.06	1.2987
Tb927.4.4150	mitochondrial RNA binding complex 1 subunit (MRB4150)	Mito.RNA	2.13	3192	364	115.8	79.9	233.5	107.4	124.9	184.3	1.08	0.64	1.27	0.64	-0.0048	0	0	-0.7768	1.43e-40	1	0	0	1	1.02	-0.1176	0	2.06	1.1635
Tb927.5.1020	disulfide isomerase, putative	Chaperone	1	2187	160	92.2	36.9	92.5	112.7	83.3	109.8	0.82	0.44	0.84	0.44	-0.5146	0	0	0.0949	0.133	0	0	0	0	1.08	-0.1021	0	2.06	1.1375
Tb927.10.11830	hypothetical protein, conserved	ZUnknown	1	1916	136	48.1	33.7	88.3	50	53.9	62.9	0.96	0.63	1.4	0.63	-0.0048	0	0	0.1901	0.0163	1	0	0	0	0.87	-0.133	0	2.06	1.257
Tb927.11.560	hypothetical protein, conserved	ZUnknown	1	1828	262	65.2	43.5	93.6	68.7	78.3	77.2	0.95	0.56	1.21	0.56	-0.1414	0	0	0.1197	0.1	0	0	0	0	1.1	-0.2355	0	2.06	1.281
Tb927.11.12440	Plus-3 domain/Zinc finger, C3HC4 type (RING finger), putative	ZUnknown	1	1677	485	82.7	78.1	101.5	39.7	36.4	54.7	2.08	2.15	1.86	1.86	1.0215	0	0	0.2389	0.00158	1	0	0	0	1.09	0.1471	0	2.06	1.1043
Tb927.11.12520	hypothetical protein, conserved	ZUnknown	1	1325	285	50.8	32.5	41.4	45.7	39.2	30.1	1.11	0.83	1.38	0.83	0.1462	0	0	0.3366	0.000184	1	0	0	0	0.97	-0.4944	0	2.06	1.1309
Tb927.2.4680	hypothetical protein, conserved	ZUnknown	1	1300	55	73.6	102.9	104.3	46.5	37.2	32.1	1.58	2.77	3.25	1.58	1.341	0	0	0.3474	0.000301	1	0	0	0	1.06	0.0383	0	2.06	1.3896
Tb927.9.1650	hypothetical protein, conserved	ZUnknown	1	1255	131	33.7	33	86.8	22.7	25.4	28.7	1.48	1.3	3.02	1.3	0.9511	0	0	0.1289	0.202	0	0	0	0	1.19	-0.0595	0	2.06	1.4114
Tb927.11.9740	tRNA intron endonuclease, catalytic C-terminal domain containing protein, putative	ZUnknown	1	702	68	30.2	40.9	47.7	46	50.1	35	0.66	0.82	1.36	0.66	-0.0791	0	0	-0.3571	6.61e-05	1	0	0	0	1.01	-0.0272	0	2.06	1.275
Tb927.11.13170	hypothetical protein, conserved	ZUnknown	1.16			27.2	16.1	60.3	33.8	19.3	30.6	0.8	0.83	1.97	0.8	0.263	0	0	-0.6012	3.22e-08	1	0	0	1	#N/A	-0.1879	0	2.06	1.3618
Tb927.3.5360	FHA domain containing protein, putative	ZUnknown	1			83.5	88.2	65.4	47.2	50	51.9	1.77	1.76	1.26	1.26	0.6751	0	0	-0.0032	0.978	0	0	0	0	#N/A	0.314	0	2.06	1.1309
Tb927.11.3970	hypothetical protein, conserved, copurifies with U2AF35, CCCH zinc finger PS50103, resembles PAT1 E=0.033	ZUnknown	1			101.5	72.4	172.6	80.6	108	159.5	1.26	0.67	1.08	0.67	0.0048	0	0	-0.1591	0.00363	1	0	0	0	#N/A	-0.0348	0	2.06	1.1763
Tb927.11.5310	PPPDE putative peptidase domain containing protein, putative	ZUnknown	1			52.2	55.6	246.5	46.9	36.8	77.4	1.11	1.51	3.18	1.11	0.9511	0	0	-0.0753	0.255	0	0	0	0	#N/A	1.9784	0	2.06	1.1827
Tb927.11.2760	hypothetical protein, conserved	ZUnknown	1			43.4	81.2	68.7	59.3	82	62.2	0.73	0.99	1.1	0.73	-0.0893	0	0	0.1614	0.0292	1	0	0	0	#N/A	-0.0097	0	2.06	1.2079
Tb927.10.980	RNA polymerase III transcription factor (TF)IIIC subunit, putative	ZUnknown	1.62			43.5	38.1	99	45.9	61.1	82.8	0.95	0.62	1.2	0.62	-0.1151	0	0	0.0654	0.401	0	0	0	0	#N/A	-0.4285	0	2.06	1.2141
Tb927.11.6600	hypothetical protein, conserved	ZUnknown	1	6888	4930	67.7	59.2	553.4	43.1	37.1	65	1.57	1.6	8.51	1.57	1.961	0	0	-0.0368	0.674	0	0	0	0	1.02	-0.7122	1	2.05	1.4542
Tb927.9.13520	Importin 1 (IMP1)	Nuclear.transport	1	3591	862	102.9	45.8	205	153.1	128.6	182.2	0.67	0.36	1.13	0.36	-0.4739	0	0	-0.4104	1.05e-18	1	0	0	0	0.93	-0.1403	0	2.05	1.1375
Tb927.7.3270	hypothetical protein, conserved	ZUnknown	1	2490	42	40.7	43.4	141.5	46.8	56.2	103.3	0.87	0.77	1.37	0.77	0.0048	0	0	0.1533	0.0156	1	0	0	0	1.14	-0.0958	0	2.05	1.1635
Tb927.11.1780	protein phosphatase 2C, putative	Protein.phosphatase	2.06	2137	1119	57.1	71.9	135.7	31.2	27	47.2	1.83	2.66	2.88	1.83	1.2967	0	0	0.2912	0.000217	1	0	0	0	1.06	-0.0344	0	2.05	1.1763
Tb927.11.9090	Putative methyltransferase, putative	ZUnknown	1	1960	626	28.1	22.5	47.7	42.3	36.5	40.2	0.66	0.62	1.19	0.62	-0.2805	0	0	0.1287	0.151	0	0	0	0	1.13	-0.1737	0	2.05	1.189
Tb927.3.2720	hypothetical protein	ZUnknown	1	1779	231	87.8	78.2	63.5	61.5	35.1	46	1.43	2.23	1.38	1.38	0.7485	0	0	-0.4255	2.44e-08	1	0	0	0	0.95	-0.1475	0	2.05	1.144
Tb927.3.4650	C-8 sterol isomerase, putative	Sterols	1	1534	731	187.2	131.1	60.9	132.4	71.8	41.4	1.41	1.83	1.47	1.41	0.6508	0	0	0.1354	0.226	0	0	0	0	1.06	-0.1614	0	2.05	1.157
Tb927.10.7970	Organic solute transporter Ostalpha, putative	ZUnknown	1	1264	54	105.5	97.3	97.8	164.8	140.6	106.9	0.64	0.69	0.91	0.64	-0.4215	0	0	0.1794	0.0103	1	0	0	0	1.07	-0.0084	0	2.05	1.2327
Tb927.8.6400	hypothetical protein, conserved	ZUnknown	1	983	125	25.7	15.4	31.2	25.7	26.7	34.4	1	0.58	0.91	0.58	-0.2688	0	0	-0.4365	2.48e-05	1	0	0	0	0.83	-0.0942	0	2.05	1.144
Tb927.8.2510	hypothetical protein, conserved	ZUnknown	1	900	152	26.2	15.9	44.5	48.7	45.1	44.7	0.54	0.35	1	0.35	-0.6666	0	0	0.1471	0.088	0	0	0	0	1.07	0.031	0	2.05	1.263
Tb927.10.6790	hypothetical protein, conserved, spindle pole body domain	Cytoskeleton	1			55.1	41.3	250.9	87.2	108.7	201.6	0.63	0.38	1.24	0.38	-0.415	0	0	0.0245	0.681	0	0	0	0	#N/A	0.0036	0	2.05	1.1827
Tb927.8.4240	hypothetical protein, conserved	Mito.pathway	1			53.1	33.2	364	68.5	78	206.4	0.78	0.43	1.76	0.43	-0.0145	0	0	0.0795	0.142	0	0	0	0	#N/A	-0.4887	0	2.05	1.1375
Tb927.11.16910	Serine hydrolase (FSH1)/RWD domain/50S ribosome-binding GTPase/GTPase of unknown function C-terminal, putative	ZUnknown	1.25			32.2	19.7	107.9	51.3	58.8	93.7	0.63	0.34	1.15	0.34	-0.5009	0	0	0.0932	0.113	0	0	0	0	#N/A	-0.1587	0	2.05	1.111
Tb927.8.6050	hypothetical protein, conserved	ZUnknown	1			79	81.6	59.6	60.4	69.8	52.2	1.31	1.17	1.14	1.14	0.271	0	0	0.083	0.385	0	0	0	0	#N/A	-0.1884	0	2.05	1.2079
Tb927.11.14920	hypothetical protein, tryp specific, linked to pentamidine action	ZUnknown	1	11306	879	140.8	74.1	647.6	253.7	237.4	664.6	0.55	0.31	0.97	0.31	-0.7131	0	0	-0.1839	2.2e-06	1	0	0	0	1.14	-0.0202	0	2.04	1.1635
Tb927.10.8420	TOR1 protein kinase	Protein.kinase	1.04	7895	538	73.3	32.7	410.4	169.6	159.2	343	0.43	0.21	1.2	0.21	-0.7053	0	0	0.0634	0.176	0	0	0	0	1.17	-0.206	0	2.04	1.189
Tb927.11.4160	predicted C2 domain protein	ZUnknown	1	4424	517	67.4	30.1	196.6	99	88.7	135.2	0.68	0.34	1.45	0.34	-0.2805	0	0	-0.0548	0.381	0	0	0	0	1.15	-0.415	0	2.04	1.1953
Tb927.8.6500	cell division cycle protein, putative	Cell.cycle	1	2913	1277	93.3	61.9	151.7	57.9	83.3	155.6	1.61	0.74	0.97	0.74	0.1462	0	0	-0.7995	9.5e-27	1	0	0	1	1.22	-0.4334	0	2.04	1.2928
Tb927.5.4060	Nicastrin, putative	ZUnknown	1	2621	415	53.1	25.5	72.7	84.8	97.4	100.7	0.63	0.26	0.72	0.26	-0.8979	0	0	0.0835	0.202	0	0	0	0	1.09	-0.2116	0	2.04	1.2869
Tb927.4.1940	WD domain, G-beta repeat, putative	ZUnknown	1	2027	570	72.5	52.3	115.5	71.1	60.8	76.1	1.02	0.86	1.52	0.86	0.1806	0	0	-0.0301	0.713	0	0	0	0	1.07	-0.231	0	2.04	1.251
Tb927.4.2480	8-oxoguanine DNA glycosylase, putative	DNA	1	2010	553	31.6	36.5	90.5	34.6	33.7	42.4	0.91	1.08	2.13	0.91	0.4577	0	0	-0.1601	0.0681	0	0	0	0	1.06	-0.3864	0	2.04	1.1827
Tb927.11.14170	hypothetical protein, conserved	ZUnknown	1	2004	119	99.9	53.7	90	148.2	96.5	78.6	0.67	0.56	1.15	0.56	-0.334	0	0	0.2863	9.63e-06	1	0	0	0	1.19	-0.0535	0	2.04	1.3045
Tb927.1.1060	Cell cycle checkpoint protein RAD1-like, putative	Cell.cycle	1.75	1817	832	19.8	16.8	53.5	19	15.6	26.3	1.04	1.08	2.03	1.04	0.4681	0	0	0.2791	0.00472	1	0	0	0	1.23	-0.2932	0	2.04	1.3161
Tb927.9.11900	acyl transferase-like protein	Lipids	1	1788	72	41.3	38.7	74.6	67	51.1	46.6	0.62	0.76	1.6	0.62	-0.0097	0	0	0.0958	0.253	0	0	0	0	0.9	-0.2213	0	2.04	1.1953
Tb927.3.3440	phytanoyl-CoA dioxygenase (PhyH), putative	ZUnknown	1	1499	455	96.5	115.2	96.7	77.8	55.5	50.6	1.24	2.08	1.91	1.24	0.8018	0	0	0.2999	0.00415	1	0	0	0	1.02	-0.0072	0	2.04	1.1506
Tb927.11.240	hypothetical protein, conserved	Mito.pathway	1			88.4	64.3	132.7	111.3	110.5	118.4	0.79	0.58	1.12	0.58	-0.2688	0	0	0.1137	0.046	1	0	0	0	#N/A	-0.137	0	2.04	1.2869
Tb927.10.6570	TPR repeat, putative	ZUnknown	2.01			146.5	292.9	315	79	58.4	59.1	1.85	5.02	5.33	1.85	2.0238	0	0	-0.0172	0.827	0	0	0	0	#N/A	1.4714	0	2.04	1.0635
Tb927.7.1410	hypothetical protein, conserved	ZUnknown	1			51.7	35.8	124.7	61.6	57.1	88.6	0.84	0.63	1.41	0.63	-0.0589	0	0	-0.0187	0.818	0	0	0	0	#N/A	-0.2356	0	2.04	1.189
Tb927.11.3400	hypothetical protein, conserved	ZUnknown	1			100.6	67.6	106.6	54.1	34	37.5	1.86	1.99	2.84	1.86	1.157	0	0	-0.045	0.647	0	0	0	0	#N/A	-0.3745	0	2.04	1.2388
Tb927.7.1570	hypothetical protein, conserved	ZUnknown	1	4644	149	61.9	34.3	167.9	116.5	78.9	119.4	0.53	0.43	1.41	0.43	-0.3401	0	0	0.0898	0.102	0	0	0	0	0.99	-0.0915	0	2.03	1.3103
Tb927.5.2980	Exocyst complex component Sec3	Vesicular.transport	1	4101	796	101	64.6	230.1	98.6	90.3	164.3	1.02	0.72	1.4	0.72	0.0658	0	0	0.0087	0.895	0	0	0	0	1.07	-0.4086	0	2.03	1.1635
Tb927.11.5640	Flagellar pocket collar protein	Cytoskeleton	1	3732	606	40.8	26.7	61.3	31	41.9	81.3	1.32	0.64	0.75	0.64	-0.1467	0	0	0.0511	0.466	0	0	0	0	0.98	-0.8393	1	2.03	1.2079
Tb927.11.6990	protein kinase, putative,serine/threonine protein kinase, putative	Protein.kinase	1	3677	1572	53.2	65.1	254.6	31	37.5	54.8	1.72	1.74	4.65	1.72	1.4347	0	0	0.1167	0.111	0	0	0	0	1.25	-0.1853	0	2.03	1.2203
Tb927.10.12780	ZC3H37	RNA.binding	5.63	3457	2506	593.2	773.4	767.6	329.4	139.5	89.9	1.8	5.54	8.54	1.8	2.4042	0	0	1.1084	8.44e-83	1	0	1	0	1.16	2.1649	0	2.03	1.1309
Tb927.4.3410	selenoprotein, putative	ZUnknown	1	2891	520	36.2	25.6	191.5	50.7	62.2	94	0.71	0.41	2.04	0.41	0.075	0	0	0.141	0.0117	1	0	0	0	1.11	-0.3126	0	2.03	1.251
Tb927.10.3490	kinetoplastid-specific dual specificity phosphatase, putative	Phosphatase	1	2552	259	98.9	44.7	117.7	111.4	98.9	144.8	0.89	0.45	0.81	0.45	-0.4806	0	0	0.34	6.18e-09	1	0	0	0	1.08	-0.3263	0	2.03	1.1699
Tb927.4.4720	KRIPP7/TbPPR7 Kinetoplast ribosomal PPR-repeat containing protein	Mito.translation	1	1672	40	9	8.2	29.2	9.5	15.8	22.1	0.95	0.52	1.32	0.52	-0.1047	0	0	0.0304	0.827	0	0	0	0	1.22	-0.1691	0	2.03	1.2388
Tb927.9.1910	hypothetical protein, conserved	ZUnknown	1	1452	472	139.1	210.3	126.5	75.6	65.5	42.7	1.84	3.21	2.96	1.84	1.4168	0	0	0.2583	0.00352	1	0	0	0	0.97	-0.0542	0	2.03	1.1827
Tb927.1.1610	hypothetical protein, conserved	Mito.pathway	2	1389	348	64.7	32.1	41.2	34.5	28.9	34.2	1.88	1.11	1.2	1.11	0.482	0	0	-0.2674	0.00682	1	0	0	0	0.92	-0.1246	0	2.03	1.1243
Tb927.4.940	hypothetical protein, conserved	ZUnknown	1	890	165	29.4	15.2	42.6	37.3	32.3	41	0.79	0.47	1.04	0.47	-0.3833	0	0	-0.5125	9.21e-08	1	0	0	0	1.03	0.0091	0	2.03	1.3505
Tb927.10.14410	leucine-rich repeat protein (LRRP)	LRRP	1			64.8	32	180.5	71.9	83	140.9	0.9	0.39	1.28	0.39	-0.2232	0	0	-0.1053	0.0486	1	0	0	0	#N/A	-0.3597	0	2.03	1.0976
Tb927.11.290	phosphatase and tensin homologue, putative	Phosphatase	1			258.1	503.4	280.2	128.8	93.6	112	2	5.38	2.5	2	1.7195	0	0	0.0034	0.972	0	0	0	0	#N/A	-0.2442	0	2.03	1.0635
Tb927.11.8960	hypothetical protein, conserved	ZUnknown	1			59.8	25	223.6	111.7	88.4	194.9	0.54	0.28	1.15	0.28	-0.6068	0	0	0.0365	0.542	0	0	0	0	#N/A	0.0465	0	2.03	1.0356
Tb927.1.3860	hypothetical protein, conserved	ZUnknown	1			60.8	30.4	169.1	69.1	75.3	115.1	0.88	0.4	1.47	0.4	-0.1255	0	0	0.2088	0.000103	1	0	0	0	#N/A	-0.2278	0	2.03	1.2016
Tb927.5.1980	Galactose oxidase, central domain/Kelch motif containing protein, putative	ZUnknown	1	4334	2277	106.6	91.2	194.2	112.1	94.3	94.4	0.95	0.97	2.06	0.95	0.4078	0	0	-0.3397	1.02e-08	1	0	0	0	1.13	0.0808	0	2.02	1.1506
Tb927.7.1070	KREX1	Mito.RNA	1	2791	96	73.3	56.2	176.1	88.4	86.5	109.8	0.83	0.65	1.6	0.65	0.038	0	0	-0.0618	0.34	0	0	0	0	1.1	-0.1843	0	2.02	1.1309
Tb927.3.620	ATP-dependent DEAD/H RNA helicase, putative Dbp7, ribosome biogenesis?	rRNA.tRNA.process	1	2706	208	128.7	76.7	87.9	103.2	71	96	1.25	1.08	0.92	0.92	0.1155	0	0	-0.1854	0.00521	1	0	0	0	1.14	0.0892	0	2.02	1.1177
Tb927.3.4350	twin BRCT domain containing protein, putative	ZUnknown	1	2435	61	41.1	40.4	110.7	60.5	64.5	80.6	0.68	0.63	1.37	0.63	-0.1627	0	0	0.2259	0.000441	1	0	0	0	1	-0.2414	0	2.02	1.281
Tb927.8.4860	kinetoplast ribosomal PPR-repeat containing protein 10	Mito.translation	1	2112	52	65.9	36.9	144.4	58.5	57.4	90.7	1.13	0.64	1.59	0.64	0.1635	0	0	0.0405	0.599	0	0	0	0	1.11	-0.0717	0	2.02	1.4542
Tb927.10.9600	protein kinase, putative,tyrosine protein kinase, putative	Protein.kinase	1	2044	299	57.2	51.6	615.5	75.8	44	62.5	0.75	1.17	9.85	0.75	1.9721	0	0	0.2832	2.07e-06	1	0	0	0	1.04	-0.1916	0	2.02	1.4594
Tb927.9.4660	hypothetical protein, conserved	ZUnknown	1	1896	383	16.2	14.6	37.2	17.5	33	45.5	0.93	0.44	0.82	0.44	-0.454	0	0	0.2122	0.00339	1	0	0	0	1.06	-0.2823	0	2.02	1.0635
Tb927.8.3430	MKS1	Cytoskeleton	1.87	1884	198	75.6	78.6	129.2	62.8	66	56.6	1.2	1.19	2.28	1.19	0.6385	0	0	-0.813	1.94e-25	1	0	0	1	1.11	-0.1499	0	2.02	1.111
Tb927.10.9900	ABC1 protein, ESP6	Transporter	1	1804	193	39.8	31	89.4	37.4	70.3	108.1	1.06	0.44	0.83	0.44	-0.3646	0	0	0.2652	1.33e-05	1	0	0	0	1.06	-0.1161	0	2.02	1.0286
Tb927.10.11400	WD domain, G-beta repeat, putative	ZUnknown	1	1661	71	35	23.3	95.1	44.2	48.1	52.9	0.79	0.48	1.8	0.48	0.0333	0	0	0.0809	0.333	0	0	0	0	1.07	-0.2947	0	2.02	1.373
Tb927.8.7280	emp24/gp25L/p24 family/GOLD, putative	Vesicular.transport	1	1309	448	84.7	82.8	57.7	35	38.7	33.3	2.42	2.14	1.73	1.73	1.0681	0	0	0.7637	1.25e-14	1	0	1	0	1.26	-0.2418	0	2.02	1.111
Tb927.8.2410	amidase, putative	Protease	1	1108	272	34.3	35.8	69.8	35.6	34.8	33.4	0.96	1.03	2.09	0.96	0.4436	0	0	0.1633	0.108	0	0	0	0	1.21	-0.1957	0	2.02	1.251
Tb927.10.4220	hypothetical protein, conserved	ZUnknown	1	1000	49	82.3	58.3	82.3	69.5	43.4	46.3	1.18	1.34	1.78	1.18	0.5194	0	0	0.1037	0.246	0	0	0	0	0.93	0.0588	0	2.02	1.144
Tb927.9.9200	alpha-1,2-mannosyltransferase, putative	Glycans	1			58	46.9	103.3	84.2	89.3	102.4	0.69	0.53	1.01	0.53	-0.4279	0	0	-0.5944	7.44e-18	1	0	0	1	#N/A	-0.106	0	2.02	1.1953
Tb927.10.4480	DNA damage repair protein, putative	DNA	2.05			40.3	37.1	90.1	67.1	70.2	69.6	0.6	0.53	1.29	0.53	-0.31	0	0	0.1004	0.131	0	0	0	0	#N/A	-0.1971	0	2.02	1.1043
Tb927.3.1360	cytosine-specific DNA methylase, putative	DNA	1			61.3	66.1	164.3	70.4	88.9	97.5	0.87	0.74	1.69	0.74	0.1375	0	0	0.0014	0.987	0	0	0	0	#N/A	-0.1538	0	2.02	1.3391
Tb927.8.4440	mitochondrial carrier protein, MCP19	Mito.transport	1			129.7	94	134.5	80.3	66.6	63.7	1.62	1.41	2.11	1.41	0.7768	0	0	0.0046	0.959	0	0	0	0	#N/A	0.221	0	2.02	1.1763
Tb927.8.5570	transporter, putative	Transporter	1			340.7	181.2	198.8	328.8	188.5	241.9	1.04	0.96	0.82	0.82	-0.0893	0	0	0.0702	0.233	0	0	0	0	#N/A	-0.151	0	2.02	1.0704
Tb927.8.5620	ubiquitin carboxyl-terminal hydrolase, putative	Ubiquitin.proteasome	1			55.1	47.3	378.6	87.6	83.2	168.6	0.63	0.57	2.25	0.57	0.2016	0	0	-0.2711	4.27e-08	1	0	0	0	#N/A	0.4939	0	2.02	1.0976
Tb927.3.890	hypothetical protein, conserved	ZUnknown	1			65.4	49.5	57.2	55	49.5	52.3	1.19	1	1.09	1	0.1287	0	0	0.175	0.0549	0	0	0	0	#N/A	0.1279	0	2.02	1.0909
Tb927.11.13410	hypothetical protein, conserved	ZUnknown	1			30.6	27	46.8	19.8	55.2	39.6	1.55	0.49	1.18	0.49	0.1021	0	0	0.0779	0.501	0	0	0	0	#N/A	-0.0736	0	2.02	1.157
Tb927.4.2490	hypothetical protein, conserved	ZUnknown	1			42.2	26.2	84.2	40	47	34.9	1.06	0.56	2.41	0.56	0.4258	0	0	-0.3641	7.71e-06	1	0	0	0	#N/A	-0.1816	0	2.02	1.1763
Tb927.11.11020	hypothetical protein, conserved, clathrin-like region, RING finger.	ZUnknown	1			39.4	13.8	238.5	62.5	72.3	239.5	0.63	0.19	1	0.19	-0.721	0	0	-0.0289	0.633	0	0	0	0	#N/A	-0.073	0	2.02	1.1827
Tb927.7.4900	XRNA	RNA.degradation	1.96	8186	2146	105.6	76.6	704.3	122.5	146.7	320.9	0.86	0.52	2.19	0.52	0.251	0	0	0.196	1.83e-06	1	0	0	0	0.92	-0.0178	0	2.01	1.2016
Tb927.11.5770	hypothetical protein, conserved	ZUnknown	1	6967	512	85.3	64.7	347.9	193.9	142.3	273.8	0.44	0.45	1.27	0.44	-0.4739	0	0	0.0731	0.119	0	0	0	0	1	-0.3552	0	2.01	1.1043
Tb927.10.9000	hypothetical protein, conserved	Mito.pathway	1.28	5137	135	94.5	48.2	358.9	147	119.6	216.7	0.64	0.4	1.66	0.4	-0.152	0	0	-0.1177	0.0165	1	0	0	0	0.97	-0.2137	0	2.01	1.1635
Tb927.11.3910	hypothetical protein, conserved, no yeast or human match	ZUnknown	1	3746	208	97.7	68	275.4	79.4	90	197.8	1.23	0.76	1.39	0.76	0.1721	0	0	0.0431	0.422	0	0	0	0	1.02	-0.1687	0	2.01	1.0566
Tb927.11.11770	eIF4E3	Translation	1	3262	1862	141.2	99.1	220.1	112.5	63.8	93.4	1.26	1.55	2.36	1.26	0.7852	0	0	-0.6294	2.48e-31	1	0	0	1	1.03	-0.1704	0	2.01	1.0215
Tb927.9.7740	lipid-like atypical dual specificity phosphatase, putative	Lipids	1	2784	1027	55.1	75.2	102.7	36.7	43.9	47.5	1.5	1.71	2.16	1.5	0.84	0	0	-0.5441	7.13e-11	1	0	0	0	1.11	-0.4281	0	2.01	1.189
Tb927.5.1770	RNA pseudouridylate synthase, putative	ZUnknown	1	2261	115	109.1	102.3	294.8	167.1	153.3	225.6	0.65	0.67	1.31	0.65	-0.1899	0	0	-0.8578	1.82e-79	1	0	0	1	1.07	-0.1606	0	2.01	1.1177
Tb927.5.2860	Protein of unknown function (DUF2453), putative	ZUnknown	1	2228	819	56.7	77.1	140.1	39.6	48.5	66.5	1.43	1.59	2.11	1.43	0.774	0	0	-0.3191	4.32e-06	1	0	0	0	1.07	-0.1933	0	2.01	1.0704
Tb927.7.7150	hypothetical protein, conserved	ZUnknown	1	2013	246	26.1	25.2	40.5	31.9	36	44.1	0.82	0.7	0.92	0.7	-0.2981	0	0	-0.2124	0.0177	1	0	0	0	1.03	-0.2553	0	2.01	1.144
Tb927.11.9680	hypothetical protein, conserved	ZUnknown	1	1936	122	51.1	47.9	98.4	47.8	50	55.9	1.07	0.96	1.76	0.96	0.3372	0	0	0.0422	0.63	0	0	0	0	0.96	-0.1869	0	2.01	1.2265
Tb927.11.3010	hypothetical protein, conserved	ZUnknown	1	1905	87	42.8	42.6	89.9	54.3	44.1	50.7	0.79	0.97	1.77	0.79	0.2347	0	0	0.0729	0.351	0	0	0	0	1.17	-0.3464	0	2.01	1.2079
Tb927.11.14160	Alpha/beta hydrolase family, putative	ZUnknown	1	1840	654	48.5	47.2	148.4	33.6	33.5	47.5	1.44	1.41	3.12	1.41	0.9928	0	0	0.0798	0.392	0	0	0	0	1.1	-0.2282	0	2.01	1.269
Tb927.11.4390	Histidine phosphatase superfamily (branch 1), putative	ZUnknown	1	1811	323	64.2	46.1	82	78.5	57.7	62.3	0.82	0.8	1.32	0.8	-0.0291	0	0	0.1451	0.054	0	0	0	0	1.05	-0.1675	0	2.01	1.2327
Tb927.8.1310	mitochondrial carrier protein, MCP15	Mito.transport	1	1810	784	30.6	33.2	73.7	28.7	24.6	32.1	1.07	1.35	2.3	1.07	0.6538	0	0	0.0833	0.386	0	0	0	0	1.1	-0.1244	0	2.01	1.3103
Tb927.10.8150	Bromodomain protein BDF1	Chromatin	1	1252	273	69.9	46.9	68.6	72.2	66.1	66.4	0.97	0.71	1.03	0.71	-0.1467	0	0	0.1588	0.0382	1	0	0	0	0.93	-0.1591	0	2.01	1.0566
Tb927.9.9170	hypothetical protein, conserved, P-loop NTP hydrolase domain, no yeast or human match	ZUnknown	1			27.6	19.7	46.7	28.9	34.3	30.8	0.96	0.57	1.52	0.57	0.0238	0	0	-0.6247	4.67e-13	1	0	0	1	#N/A	-0.1516	0	2.01	1.3045
Tb927.4.2190	GTP-binding protein, putative	Enzyme	1			49.8	37.6	137.3	51.9	52.4	91.1	0.96	0.72	1.51	0.72	0.0886	0	0	-0.0975	0.177	0	0	0	0	#N/A	-0.1163	0	2.01	1.3674
Tb927.11.5070	ethanolamine phosphotransferase (EPT) (TbGPI13)	GPI.anchors	1			150.4	105.9	195.1	132.1	94.3	140.2	1.14	1.12	1.39	1.12	0.2829	0	0	-0.1546	0.0216	1	0	0	0	#N/A	-0.0398	0	2.01	1.0704
Tb927.10.14300	protein kinase, putative,serine/threonine protein kinase, putative	Protein.kinase	1			79.9	81.2	412.5	86.4	127.8	219.4	0.92	0.64	1.88	0.64	0.1974	0	0	0.1555	0.00151	1	0	0	0	#N/A	-0.4804	0	2.01	1.0496
Tb927.7.1880	zinc finger protein, putative	Zinc.finger	1.97			150	201.8	188.6	199.4	156.5	89.4	0.75	1.29	2.11	0.75	0.4681	0	0	0.2675	0.000117	1	0	0	0	#N/A	-0.1638	0	2.01	1.2265
Tb927.8.4370	hypothetical protein, conserved, no domains, K-specific	ZUnknown	1			80.2	58.2	255.7	72.1	79.2	137.7	1.11	0.73	1.86	0.73	0.3026	0	0	-0.1597	0.00412	1	0	0	0	#N/A	-0.497	0	2.01	1.1827
Tb927.11.16950	hypothetical protein, conserved	ZUnknown	1			33.6	321.2	79.3	30.5	30.6	21.7	1.1	10.5	3.65	1.1	2.3458	0	0	0.1118	0.343	0	0	0	0	#N/A	-0.1813	0	2.01	1.2079
Tb927.11.16550	ZC3H46	RNA.binding	1	13101	11397	87.6	89.2	314.4	46.2	32.1	46.1	1.9	2.78	6.82	1.9	1.9386	0	0	0.4198	8.55e-11	1	0	0	0	1.47	-0.5089	0	2	1.1763
Tb927.10.10090	CMF14, possible component of motile flagella, TbTBC-L	Cytoskeleton	1	3681	235	65.8	48.7	173.7	84.2	91.3	161.5	0.78	0.53	1.08	0.53	-0.328	0	0	0.3085	7.44e-09	1	0	0	0	1.16	0.2362	0	2	1.0426
Tb927.11.16140	DNA replication licensing factor MCM7	DNA	1	2718	258	30.7	19.1	92.2	29.1	38	70.9	1.05	0.5	1.3	0.5	-0.074	0	0	0.1888	0.00313	1	0	0	0	1.17	-0.2135	0	2	1.0772
Tb927.5.2310	Phosphorylated CTD interacting factor 1 WW domain containing protein, putative	ZUnknown	1	2652	418	53.7	48.4	186.9	66.5	51.2	91.5	0.81	0.95	2.04	0.81	0.341	0	0	-0.1616	0.00745	1	0	0	0	1.05	-0.459	0	2	1.0426
Tb927.5.1780	hypothetical protein, conserved	ZUnknown	1.29	2463	935	258.4	212.3	682.3	214.7	164.1	237	1.2	1.29	2.88	1.2	0.84	0	0	-0.4196	7.02e-11	1	0	0	0	1.33	-0.1712	0	2	1.2987
Tb927.6.880	conserved protein	ZUnknown	1	1862	459	40.3	32.1	75.1	50.9	51.9	75.5	0.79	0.62	0.99	0.62	-0.3219	0	0	0.0373	0.615	0	0	0	0	0.97	-0.2738	0	2	1.0704
Tb927.5.3440	hypothetical protein, conserved	ZUnknown	1.81	1810	525	162.1	211.4	377.5	138.9	65.5	42.2	1.17	3.23	8.95	1.17	2.1538	0	0	1.9085	3.07e-136	1	0	0	0	1.72	0.9877	0	2	1.281
Tb927.11.8110	hypothetical protein, conserved	ZUnknown	1	1250	226	47.4	36.5	63.3	29.5	28.9	34.8	1.61	1.26	1.82	1.26	0.6446	0	0	0.0242	0.818	0	0	0	0	1.08	-0.0746	0	2	1.0772
Tb927.2.3660	paraflagellar rod protein PFC10	Cytoskeleton	1.22			122	77.9	760.1	256.9	256.1	627.4	0.47	0.3	1.21	0.3	-0.5995	0	0	-0.2705	1.89e-12	1	0	0	0	#N/A	0.1086	0	2	1.0496
Tb927.11.13360	AAA ATPase, putative	Enzyme	1			67.5	35.8	357.8	103.4	137.9	287.7	0.65	0.26	1.24	0.26	-0.4806	0	0	-0.3351	3.76e-16	1	0	0	0	#N/A	-0.5875	1	2	1.1375
Tb927.4.330	hypothetical protein, conserved	Mito.pathway	1			41.2	28.8	71.4	48.1	27.4	51.5	0.86	1.05	1.39	0.86	0.1375	0	0	-0.2958	0.00208	1	0	0	0	#N/A	-0.042	0	2	1.0635
Tb927.5.1310	protoheme IX farnesyltransferase, putative	Mito.pathway	1			52.5	61.2	101.7	58.3	41.8	45.4	0.9	1.46	2.24	0.9	0.6167	0	0	0.3009	4.42e-05	1	0	0	0	#N/A	-0.334	0	2	1.1309
Tb927.10.6930	hypothetical protein. cullin, cullin-Nedd88 bs site like	Ubiquitin.proteasome	1.95			57.7	34.4	167.7	72.7	76.8	112.4	0.79	0.45	1.49	0.45	-0.1361	0	0	0.0428	0.536	0	0	0	0	#N/A	-0.199	0	2	1.144
Tb927.10.15660	hypothetical protein, conserved	ZUnknown	1.15			55.1	39.6	100.7	39.9	40.7	77.8	1.38	0.97	1.29	0.97	0.279	0	0	-0.2158	0.000544	1	0	0	0	#N/A	-0.3857	0	2	1.281
Tb927.10.15730	SPRY domain/Ankyrin repeats (3 copies), putative	Cytoskeleton	1.05	10684	47	60.6	34.1	522.7	119.9	193.6	552.6	0.51	0.18	0.95	0.18	-0.8713	0	0	-0.3375	2.04e-19	1	0	0	0	1.06	-0.1901	0	1.99	1.1635
Tb927.7.1420	hypothetical protein, conserved	ZUnknown	1	6193	1235	151.6	120.6	385.3	266.5	442.7	476.9	0.57	0.27	0.81	0.27	-0.8625	0	0	-0.0943	0.0425	1	0	0	0	1.07	-0.2076	0	1.99	1.1177
Tb927.11.7820	endonuclease/exonuclease/phosphatase, putative	DNA	1	5944	4033	124.3	97.8	444.6	130.8	75.8	78.5	0.95	1.29	5.66	0.95	1.3969	0	0	-0.919	7.35e-66	1	0	0	1	0.46	-0.3538	0	1.99	1.251
Tb927.7.7220	hypothetical protein, conserved, no yeast or human match	ZUnknown	1	4078	967	25.4	17.4	33.7	36	44.4	62.1	0.71	0.39	0.54	0.39	-0.8713	0	0	-0.0006	0.994	0	0	0	0	0.85	-0.0911	0	1.99	1.2388
Tb927.11.5730	pre-mRNA splicing factor, putative,ATP- dependent RNA helicase, putative	RNA.processing	1	3405	215	67.2	47.3	143.6	90	81.5	117	0.75	0.58	1.23	0.58	-0.2288	0	0	0.0598	0.315	0	0	0	0	1.03	-0.1796	0	1.99	1.0635
Tb927.1.1690	RNA editing endoribonuclease (KREN1)	Mito.RNA	1	2828	361	38.7	27.2	103.6	51.3	52	77.3	0.75	0.52	1.34	0.52	-0.2009	0	0	-0.2665	1.41e-05	1	0	0	0	1.13	-0.1921	0	1.99	1.144
Tb927.10.9080	pteridine transporter, putative	Transporter	1	2438	445	474.4	772.9	2845.8	596	215.4	289.6	0.8	3.59	9.83	0.8	2.2449	0	0	0.7556	5.36e-52	1	0	1	0	1.02	-0.2176	0	1.99	1.3045
Tb927.7.1510	pseudouridylate synthase I, putative	rRNA.tRNA.process	1	2025	129	37.3	13.5	79.7	48.2	37.4	58.8	0.77	0.36	1.36	0.36	-0.2688	0	0	0.1053	0.163	0	0	0	0	1.21	-0.2725	0	1.99	1.1506
Tb927.8.6220	Phosphorylated CTD interacting factor 1 WW domain containing protein, putative	ZUnknown	1	1850	114	43.8	20.8	79.6	45.5	34.3	65	0.96	0.61	1.22	0.61	-0.1047	0	0	0.0093	0.911	0	0	0	0	1.12	-0.2798	0	1.99	1.0909
Tb927.8.6410	short-chain dehydrogenase, putative	Mito.pathway	1	1635	110	59.8	57.7	66	58	47.9	42.9	1.03	1.2	1.54	1.03	0.3296	0	0	-0.306	0.000213	1	0	0	0	0.9	-0.0311	0	1.99	1.3448
Tb927.11.11050	hypothetical protein, conserved	ZUnknown	1	1311	236	30.9	26.5	93.4	29.2	29.8	47.9	1.06	0.89	1.95	0.89	0.3785	0	0	0.2575	0.00842	1	0	0	0	1.23	-0.1625	0	1.99	1.0772
Tb927.9.9990	kinetoplastid-specific dual specificity phosphatase, putative	Phosphatase	1	1075	23	91.4	73.3	52.1	62.7	60.8	49.8	1.46	1.21	1.05	1.05	0.3103	0	0	0.1631	0.0761	0	0	0	0	1.13	-0.0703	0	1.99	1.0356
Tb927.10.5920	hypothetical protein, conserved	ZUnknown	1			99.9	68.1	313.4	80.4	73.5	103.8	1.24	0.93	3.02	0.93	0.7908	0	0	-0.6631	2.05e-22	1	0	0	1	#N/A	-0.0951	0	1.99	1.0215
Tb927.10.3000	OFD1	Cytoskeleton	1.34			50.5	28.1	215.3	119	117.1	248.5	0.42	0.24	0.87	0.24	-0.9714	0	0	0.1453	0.00604	1	0	0	0	#N/A	-0.1783	0	1.99	1.1043
Tb927.10.6690	protein tyrosine phosphatase, putative (TbPTP1)	Protein.phosphatase	1			103.7	63.8	81.6	62.3	47.2	55.3	1.66	1.35	1.48	1.35	0.5818	0	0	-0.0107	0.925	0	0	0	0	#N/A	-0.1523	0	1.99	1.2327
Tb927.11.660	hypothetical protein, conserved. predicted zinc finger protein	Zinc.finger	1			37.8	34.2	70.6	38.1	44	45.2	0.99	0.78	1.56	0.78	0.1506	0	0	0.2366	0.00146	1	0	0	0	#N/A	-0.0699	0	1.99	1.1375
Tb927.3.2780	hypothetical protein, conserved	ZUnknown	1			52.4	60.5	242.3	78.5	95.4	116.3	0.67	0.63	2.08	0.63	0.1721	0	0	-0.1226	0.0344	1	0	0	0	#N/A	-0.2099	0	1.99	1.144
Tb927.4.4100	hypothetical protein, conserved	ZUnknown	1			45.2	29.2	96.9	43.1	47.5	83	1.05	0.61	1.17	0.61	-0.0842	0	0	-0.2565	0.000286	1	0	0	0	#N/A	-0.1122	0	1.99	1.189
Tb927.11.16620	hypothetical protein, conserved	ZUnknown	1.07			39.7	28.1	132.4	32.9	25.8	34.6	1.21	1.09	3.83	1.09	1.0309	0	0	0.1098	0.188	0	0	0	0	#N/A	-0.1706	0	1.99	1.406
Tb927.11.2620	hypothetical protein, conserved, no domains	ZUnknown	1	3456	1292	82.7	56.6	99.7	61.3	47.3	72.9	1.35	1.2	1.37	1.2	0.3859	0	0	-0.4787	9.07e-14	1	0	0	0	1.12	-0.4111	0	1.98	1.111
Tb927.3.3090	helicase, putative	DNA	1	3086	153	52	38.7	146	53.7	51.9	87.4	0.97	0.75	1.67	0.75	0.1763	0	0	0.0021	0.977	0	0	0	0	1.22	-0.3047	0	1.98	1.1827
Tb927.1.5030	leucine-rich repeat protein (LRRP)	LRRP	1	2834	583	81.7	86.6	227	79.6	58.4	72.2	1.03	1.48	3.14	1.03	0.9133	0	0	-0.0699	0.389	0	0	0	0	0.99	-0.0282	0	1.98	1.0635
Tb927.8.8020	monoglyceride lipase, putative	Lipids	1.86	2514	1359	198.3	192.2	132.3	131.9	65.3	42.6	1.5	2.94	3.11	1.5	1.3315	0	0	-0.9151	9.69e-22	1	0	0	1	1.33	1.0283	0	1.98	1.0976
Tb927.8.3800	nucleoside phosphatase, putative,guanosine diphosphatase, putative	Nucleotides	1	2458	225	102.5	42.4	79.1	88.9	101	116.2	1.15	0.42	0.68	0.42	-0.415	0	0	-0.3283	8.42e-08	1	0	0	0	1.25	-0.3838	0	1.98	1.189
Tb927.3.2660	TatD related DNase, putative	ZUnknown	1	2324	116	36.8	22.5	83.9	41.7	47.5	87.6	0.88	0.47	0.96	0.47	-0.3771	0	0	-0.0445	0.562	0	0	0	0	1.08	-0.1479	0	1.98	1.1177
Tb927.11.5670	MND1 homologue, putative involvement in meiosis	DNA	1	2012	842	54.5	73.2	43.2	29.3	25.9	21.6	1.86	2.83	2	1.86	1.157	0	0	1.6218	1.18e-66	1	0	1	0	1.6	-0.4569	0	1.98	1.0909
Tb927.10.15490	GDP-mannose 4,6 dehydratase, putative	Glycans	1	1867	730	88.7	62.1	92.3	61.1	47.7	63.9	1.45	1.3	1.44	1.3	0.482	0	0	-0.4845	1.3e-12	1	0	0	0	1.05	-0.0917	0	1.98	1.0841
Tb927.11.5860	protein kinase, putative	Protein.kinase	1	1847	808	42.3	83.6	88.4	31.3	34.1	24.4	1.35	2.45	3.62	1.35	1.3065	0	0	0.1512	0.197	0	0	0	0	1.26	0.6068	0	1.98	1.3896
Tb927.7.6930	ATPase, putative	Mito.pathway	1	1655	78	29.5	21.2	43.5	28.2	38.6	55.2	1.05	0.55	0.79	0.55	-0.328	0	0	0.3185	3.89e-05	1	0	0	0	1.17	-0.1784	0	1.98	1.1827
Tb927.6.4630	kinetoplastid-specific phospho-protein phosphatase, putative	Protein.phosphatase	1	1599	459	122.3	78.8	80.4	138.7	131	113.5	0.88	0.6	0.71	0.6	-0.454	0	0	-0.0809	0.22	0	0	0	0	1	0.0796	0	1.98	1.0976
Tb927.7.1840	zinc finger protein, putative	Zinc.finger	2.03	1219	322	154.7	214.2	202.1	206.6	160.5	96.6	0.75	1.33	2.09	0.75	0.4751	0	0	0.2229	0.00149	1	0	0	0	1.2	-0.0838	0	1.98	1.2987
Tb927.1.3040	hypothetical protein, conserved	ZUnknown	1	1132	248	17.4	16.8	36.5	21.8	29	27.7	0.8	0.58	1.32	0.58	-0.152	0	0	0.2544	0.00545	1	0	0	0	0.92	-0.1454	0	1.98	1.1243
Tb927.10.8620	hypothetical protein, conserved	ZUnknown	1	713	120	17.4	12.7	29.7	14.7	19.7	23.9	1.18	0.64	1.24	0.64	0.0286	0	0	0.1794	0.0856	0	0	0	0	1.03	-0.3181	0	1.98	1.1763
Tb927.11.7580	hypothetical protein, conserved	Mito.DNA	1			179	272.9	369.6	106.3	145.5	185.6	1.68	1.88	1.99	1.68	0.8875	0	0	-0.6898	1.64e-39	1	0	0	1	#N/A	-0.2911	0	1.98	1.0496
Tb927.4.4030	CCCH zinc finger in TRM13 protein/U11-48K-like CHHC zinc finger/Methyltransferase TRM13, putative	ZUnknown	1			56.8	37.1	82.5	52.8	29.9	36.1	1.08	1.24	2.29	1.08	0.6198	0	0	-0.6554	4.37e-13	1	0	0	1	#N/A	-0.1119	0	1.98	1.1699
Tb927.7.910	hypothetical protein, conserved	Mito.pathway	1.5			80.9	45.2	139.4	94.2	62.2	112.8	0.86	0.73	1.24	0.73	-0.0842	0	0	0.095	0.182	0	0	0	0	#N/A	-0.1324	0	1.98	1.0072
Tb927.9.14050	Lipase (class 3), putative	Mito.translation	1			10.7	5	45.4	23.8	17.3	45.9	0.45	0.29	0.99	0.29	-0.7942	0	0	0.0345	0.727	0	0	0	0	#N/A	-0.1615	0	1.98	1.2203
Tb927.11.8290	DIS3L2, RNaseB motif protein, no PIN domain	RNA.degradation	1.15			107.6	100.7	178.7	95.2	95	137.1	1.13	1.06	1.3	1.06	0.2183	0	0	0.1657	0.00681	1	0	0	0	#N/A	-0.0788	0	1.98	1.0566
Tb927.11.4380	ATP-dependent RNA helicase, putative Brr2 homologue, disruption of U4/U6 pairing, also resembles Slh1	RNA.helicase	1			53.4	30.5	325	103.8	121.7	255	0.51	0.25	1.27	0.25	-0.5635	0	0	-0.0966	0.0366	1	0	0	0	#N/A	-0.0819	0	1.98	1.0635
Tb927.3.3070	3', 5'-cyclic nucleotide phosphodiesterase, putative (PDEC)	Signalling	1			47	63.6	330.3	36.2	51.3	88	1.3	1.24	3.75	1.24	1.0681	0	0	0.3447	1.4e-10	1	0	0	0	#N/A	-0.1531	0	1.98	1.2016
Tb927.3.4020	PI4 kinase	Signalling	1			58.1	17.2	772	76.3	47.7	262.2	0.76	0.36	2.94	0.36	0.4365	0	0	0.0615	0.231	0	0	0	0	#N/A	-0.0794	0	1.98	1.4803
Tb927.11.12840	Domain of unknown function (DUF4486), putative	ZUnknown	1.34			64.3	24	798.4	186.7	241.2	759.3	0.34	0.1	1.05	0.1	-1.0097	0	0	-0.1008	0.0239	1	0	0	0	#N/A	-0.3099	0	1.98	1.1043
Tb927.10.1820	hypothetical protein, conserved	ZUnknown	1			17.5	12.7	32.8	17.4	11.4	20.9	1.01	1.11	1.57	1.01	0.2987	0	0	-0.035	0.805	0	0	0	0	#N/A	0.138	0	1.98	1.2141
Tb927.10.1460	protein kinase, putative	Protein.kinase	1.08	3306	635	41.3	36.9	116.9	62.9	71.2	105.6	0.66	0.52	1.11	0.52	-0.3896	0	0	0.0121	0.887	0	0	0	0	1.09	-0.1252	0	1.97	1.0704
Tb927.4.1880	hypothetical protein, conserved	ZUnknown	1	3169	2184	80.1	140.2	222.3	45.5	38	34.2	1.76	3.69	6.5	1.76	1.994	0	0	0.3778	1.28e-07	1	0	0	0	0.92	0.1101	0	1.97	1.1827
Tb927.11.3960	btb/poz domain containing protein, putative	ZUnknown	1	2695	474	66.1	51.7	185.7	73.1	81	118.9	0.9	0.64	1.56	0.64	0.0473	0	0	0.0542	0.396	0	0	0	0	1.04	-0.4605	0	1.97	1.1953
Tb927.4.2780	hypothetical protein, conserved	ZUnknown	1	2693	168	35.1	24.1	64.9	53.4	64.9	73.2	0.66	0.37	0.89	0.37	-0.6439	0	0	-0.5866	2.86e-21	1	0	0	1	1	-0.2371	0	1.97	1.0215
Tb927.9.13580	hypothetical protein, conserved	Mito.pathway	1	1909	363	43.3	52.5	56.7	40.9	40.8	33.5	1.06	1.29	1.69	1.06	0.4294	0	0	-0.0365	0.723	0	0	0	0	0.97	-0.3502	0	1.97	1.2203
Tb927.4.1430	hypothetical protein, conserved	ZUnknown	1	1756	229	110.5	135.9	174.3	61.2	66.5	95.3	1.81	2.04	1.83	1.81	0.9209	0	0	0.1432	0.032	1	0	0	0	0.99	-0.2121	0	1.97	1.0426
Tb927.7.6800	LSU ribosomal protein, mitochondrial, putative	Mito.translation	1	1631	369	30.4	34.9	62	30	25.9	30.4	1.01	1.35	2.04	1.01	0.5525	0	0	0.6063	6.08e-12	1	0	1	0	1.07	-0.3125	0	1.97	1.251
Tb927.9.7800	hypothetical protein, conserved	ZUnknown	1	1034	206	77.2	49	53.9	70.8	49.1	46.6	1.09	1	1.16	1	0.1155	0	0	-1.1313	8.94e-34	1	0	0	1	0.93	0.0314	0	1.97	1.1243
Tb927.3.2790	leucine-rich repeat protein (LRRP)	LRRP	1.08			29.2	15.6	102.8	40.7	37	72.9	0.72	0.42	1.41	0.42	-0.2345	0	0	-0.1366	0.0292	1	0	0	0	#N/A	-0.2543	0	1.97	1.1177
Tb927.10.10070	hypothetical protein, conserved	ZUnknown	1.59			67.4	43.9	61.9	61.9	53.1	53.4	1.09	0.83	1.16	0.83	0.038	0	0	-0.1829	0.0379	1	0	0	0	#N/A	0.2189	0	1.97	1.0072
Tb927.10.7890	hypothetical protein, conserved	ZUnknown	1.35			91.6	47.3	192.6	101.9	66.1	124.5	0.9	0.72	1.55	0.72	0.0795	0	0	0.1669	0.0043	1	0	0	0	#N/A	-1.1352	1	1.97	1.1177
Tb927.11.4520	hypothetical protein, conserved	ZUnknown	1			53.2	45	288.3	104	137.9	218.9	0.51	0.33	1.32	0.33	-0.4739	0	0	-0.0119	0.847	0	0	0	0	#N/A	-0.2746	0	1.97	1.144
Tb927.5.980	2OG-Fe(II) oxygenase superfamily, putative	ZUnknown	1			72.9	55.1	72.6	83.3	61.8	52.5	0.88	0.89	1.38	0.88	0.0704	0	0	0.2181	0.00995	1	0	0	0	#N/A	-0.1547	0	1.97	1.189
Tb927.5.2020	hypothetical protein, conserved	ZUnknown	1	14130	10416	15.1	7.7	111.3	20.9	21.2	66.8	0.72	0.36	1.67	0.36	-0.1255	0	0	0.2661	0.00126	1	0	0	0	1.42	-0.2252	0	1.96	1.111
Tb927.4.800	TOR3 protein kinase = TOR-like 1	Protein.kinase	1.14	9152	1117	92.6	104.8	699	193.8	177.4	447.3	0.48	0.59	1.56	0.48	-0.1899	0	0	-0.4306	2.01e-26	1	0	0	0	1.04	0.1432	0	1.96	1.0356
Tb927.11.15330	phosphatidylinositol 3-kinase catalytic subunit, putative	Signalling	1	4058	702	56.8	51.5	266.9	67.1	66.6	97	0.85	0.77	2.75	0.77	0.5427	0	0	0.3428	2.95e-10	1	0	0	0	1.02	-0.45	0	1.96	1.1506
Tb927.9.2590	hypothetical protein, conserved	ZUnknown	1	4009	714	147	52.3	248.6	226.9	140.5	247.1	0.65	0.37	1.01	0.37	-0.5635	0	0	-0.4444	6.75e-22	1	0	0	0	1.56	0.9021	0	1.96	0.9928
Tb927.7.5230	lanosterol synthase	Sterols	1	3534	730	178	107.8	282.8	265.3	309.6	288.1	0.67	0.35	0.98	0.35	-0.585	0	0	0.1114	0.0498	1	0	0	0	1.15	-0.2767	0	1.96	1.0976
Tb927.3.4490	protein farnesyltransferase alpha subunit, putative	Prenylation	1	2694	792	90.8	57	120.2	108.1	85.3	85.1	0.84	0.67	1.41	0.67	-0.039	0	0	0.0023	0.98	0	0	0	0	1	-0.2169	0	1.96	1.0566
Tb927.4.2210	hypothetical protein, conserved	ZUnknown	1	2694	1832	79.5	120.3	145.4	66.7	60.5	67.6	1.19	1.99	2.15	1.19	0.8292	0	0	-0.0238	0.806	0	0	0	0	1.17	-0.2493	0	1.96	1.0426
Tb927.10.5590	protein phosphatase 2C, putative	Protein.phosphatase	1	2258	406	52.2	64.2	109.5	59	58.8	62.8	0.88	1.09	1.74	0.88	0.3065	0	0	0.2605	0.000109	1	0	0	0	0.99	-0.2338	0	1.96	1.3391
Tb927.10.9180	PRA1 family protein, putative	ZUnknown	2.14	2055	773	117.2	149.8	232.9	87.8	107.4	105.1	1.33	1.39	2.22	1.33	0.7195	0	0	0.3816	4.09e-11	1	0	0	0	1.29	0.5377	0	1.96	1.0909
Tb927.11.11960	hypothetical protein, conserved	ZUnknown	1	2008	1029	29.9	12.7	37.2	34.4	25.1	29.6	0.87	0.51	1.26	0.51	-0.1844	0	0	0.2521	0.0258	1	0	0	0	0.84	-0.2064	0	1.96	1.3674
Tb927.3.5380	Tubulin-tyrosine ligase family, putative	ZUnknown	1	1947	362	93.5	86.3	93.7	93.7	63.1	69.7	1	1.37	1.34	1	0.3065	0	0	0.2727	2.63e-05	1	0	0	0	1.12	-0.0855	0	1.96	1.0426
Tb927.3.1270	PRP38 family, putative	ZUnknown	1	1939	128	67.9	54.7	98.3	58.3	64.3	69.7	1.16	0.85	1.41	0.85	0.189	0	0	0.1297	0.0894	0	0	0	0	1.11	-0.0425	0	1.96	1.1177
Tb927.6.4400	hypothetical protein, conserved	ZUnknown	2.12	1909	68	221.3	207.4	356.1	220.5	144.5	161	1	1.44	2.21	1	0.6323	0	0	-0.4944	4.77e-14	1	0	0	0	1.08	-0.2565	0	1.96	1.2928
Tb927.9.5630	KREPB7	Mito.RNA	1	1645	221	65.9	45.3	93.9	59.5	49.4	48	1.11	0.92	1.96	0.92	0.4114	0	0	0.1462	0.0867	0	0	0	0	1.1	-0.2069	0	1.96	1.251
Tb927.7.1250	hypothetical protein, conserved	ZUnknown	2.97	1544	358	276.8	329	347.2	203.3	148.8	117.5	1.36	2.21	2.95	1.36	1.1199	0	0	0.0949	0.258	0	0	0	0	1.12	-0.2829	0	1.96	1.0909
Tb927.8.990	RBP33	RNA.binding	1			196.9	76.7	207.9	115.2	62.2	117	1.71	1.23	1.78	1.23	0.6538	0	0	-0.7386	5.3e-42	1	0	0	1	#N/A	0.5073	0	1.96	1.4005
Tb927.1.2730	hypothetical protein, conserved	ZUnknown	1			133.7	228.6	173	78.1	42	42.4	1.71	5.44	4.08	1.71	1.9043	0	0	-0.6488	2.89e-16	1	0	0	1	#N/A	0.1229	0	1.96	1.0356
Tb927.7.310	Thioredoxin domain, also matches human prostaglandin E synthetase	Enzyme	1			110.8	63	114.8	88.7	34.1	37.6	1.25	1.85	3.05	1.25	1.0356	0	0	1.6349	1.66e-98	1	0	1	0	#N/A	0.0574	0	1.96	1.269
Tb927.11.8150	protein kinase, putative	Protein.kinase	1.44			80.5	47.7	266.4	122.1	102.6	207.1	0.66	0.46	1.29	0.46	-0.3159	0	0	-0.1031	0.0526	0	0	0	0	#N/A	-0.3528	0	1.96	1.1043
Tb927.9.1670	AUK3 protein kinase	Protein.kinase	1.33			84.6	55.6	109.9	57.9	27.9	41.4	1.46	1.99	2.65	1.46	1.0238	0	0	0.0087	0.937	0	0	0	0	#N/A	-0.2367	0	1.96	1.1309
Tb927.10.2220	piwi-like protein 1	RNA.degradation	1			54.2	44.5	161.2	57.2	54.1	74.3	0.95	0.82	2.17	0.82	0.3932	0	0	0.4001	8.33e-11	1	0	0	0	#N/A	-0.3907	0	1.96	1.1763
Tb927.11.16570	ATP-dependent DEAD/H RNA helicase, putative, no clear yeast homologue	RNA.helicase	1			97.9	63.8	119.7	96.1	82.2	58.3	1.02	0.78	2.05	0.78	0.3599	0	0	0.1149	0.127	0	0	0	0	#N/A	-0.1596	0	1.96	1.3045
Tb927.6.2240	hypothetical protein, conserved	ZUnknown	1			51	35	53.8	56.9	62.3	54.3	0.9	0.56	0.99	0.56	-0.2922	0	0	0.0518	0.553	0	0	0	0	#N/A	-0.0571	0	1.96	1.0286
Tb927.8.5680	Pyridoxal-dependent decarboxylase conserved domain containing protein, putative	ZUnknown	1			39.9	24	74.6	33.3	39.6	76.8	1.2	0.61	0.97	0.61	-0.1099	0	0	0.0595	0.445	0	0	0	0	#N/A	-0.2357	0	1.96	1.111
Tb927.7.6390	hypothetical protein, conserved	ZUnknown	1			42.4	37.3	133.5	42.4	72.7	95.9	1	0.51	1.39	0.51	-0.0489	0	0	0.1147	0.0809	0	0	0	0	#N/A	-0.2412	0	1.96	1.1243
Tb927.2.4160	hypothetical protein, conserved	ZUnknown	1			74.4	38.6	115.1	70.5	56.1	72.1	1.06	0.69	1.6	0.69	0.1592	0	0	-0.4189	9.67e-09	1	0	0	0	#N/A	-0.3832	0	1.96	1.2016
Tb927.8.2130	cyclic nucleotide-binding domain containing protein, putative	ZUnknown	1			32	16.2	59.4	37.7	24.5	42.6	0.85	0.66	1.39	0.66	-0.0489	0	0	0.2157	0.00807	1	0	0	0	#N/A	-0.2455	0	1.96	1.2079
Tb927.9.4450	hypothetical protein	ZUnknown	1			116.6	150.9	327.1	67.6	60.8	89.5	1.72	2.48	3.65	1.72	1.3877	0	0	-0.2866	5.32e-07	1	0	0	0	#N/A	1.2553	0	1.96	1.2265
Tb927.11.9340	Galactose oxidase, central domain containing protein, putative	ZUnknown	1			12.1	9.6	45	17	20.1	33.8	0.71	0.48	1.33	0.48	-0.2515	0	0	-0.3978	1.49e-06	1	0	0	0	#N/A	-0.1236	0	1.96	1.3334
Tb927.5.570	hypothetical protein, conserved, no clear yeast or human matches	ZUnknown	1	7668	1224	45.5	24.9	310.9	72.8	141.9	300.5	0.63	0.18	1.03	0.18	-0.7053	0	0	-0.0396	0.443	0	0	0	0	1.03	-0.446	0	1.95	1.1375
Tb927.10.10050	hypothetical protein, conserved, 8 TM domains	ZUnknown	1	5332	672	116.2	141.9	299.1	159.8	153	276.6	0.73	0.93	1.08	0.73	-0.1308	0	0	0.1467	0.00144	1	0	0	0	1.01	0.3974	0	1.95	1.1953
Tb927.8.5220	hypothetical protein, conserved	Mito.pathway	1	3516	226	30.9	19.2	103.2	54.1	82.7	128.5	0.57	0.23	0.8	0.23	-0.9069	0	0	-0.1164	0.0624	0	0	0	0	1.13	-0.2385	0	1.95	1.189
Tb927.5.2130	Lariat debranching enzyme, C-terminal domain containing protein, putative	ZUnknown	1	3322	1678	36.1	26.3	82	47.9	55.1	66.4	0.75	0.48	1.23	0.48	-0.2863	0	0	-0.0636	0.397	0	0	0	0	0.79	-0.2715	0	1.95	1.1699
Tb927.10.8050	TFIIF-stimulated CTD phosphatase, putative	Protein.phosphatase	1	2830	1894	54.7	64.3	180.5	28.4	19.2	17.6	1.93	3.35	10.26	1.93	2.373	0	0	1.3002	1.81e-59	1	0	1	0	1.47	2.197	0	1.95	1.406
Tb927.5.470	Riboflavin transporter	Transporter	2.16	2671	462	106.4	175.7	122	91.5	101.5	74.6	1.16	1.73	1.64	1.16	0.5945	0	0	1.1499	5.04e-52	1	0	1	0	1.23	0.3883	0	1.95	1.275
Tb927.5.2070	LSU ribosomal protein, mitochondrial, putative	Mito.translation	1	2234	241	35.1	29.5	73.8	30.6	75.6	82.2	1.15	0.39	0.9	0.39	-0.2981	0	0	0.0452	0.565	0	0	0	0	1.22	-0.1763	0	1.95	1.0704
Tb927.6.3860	leucyl/phenylalanyl-tRNA protein transferase, putative	ZUnknown	1	2162	382	137.1	176.1	98.7	70.1	65.5	42.7	1.96	2.69	2.31	1.96	1.2141	0	0	-0.356	2.9e-05	1	0	0	0	0.95	-0.2947	0	1.95	1.1309
Tb927.11.8780	hypothetical protein, conserved	ZUnknown	1	2088	346	29.6	32.7	89.3	37.1	62.1	85.8	0.8	0.53	1.04	0.53	-0.3401	0	0	-0.4934	4.32e-14	1	0	0	0	1.13	-0.1463	0	1.95	1.1309
Tb927.10.13120	mitochondrial carrier protein, MCP14 possible proline transporter	Mito.transport	1	2037	808	31	25.9	42	36.5	32.6	33.1	0.85	0.79	1.27	0.79	-0.0439	0	0	0.0113	0.919	0	0	0	0	1.09	-0.0836	0	1.95	1.0566
Tb927.9.6060	Erv homologue, FAD-linked sulfhydryl oxidase, POMP4	Mito.Biogenesis	1	1743	827	72.9	43.1	60.4	36.9	29.6	50.9	1.98	1.46	1.19	1.19	0.626	0	0	0.1346	0.146	0	0	0	0	1.06	-0.3574	0	1.95	1.0496
Tb927.5.4080	hypothetical protein, conserved	Mito.pathway	1	1739	89	34.1	32.4	79.9	55	66.5	71.1	0.62	0.49	1.12	0.49	-0.4279	0	0	0.3048	1.01e-05	1	0	0	0	1.25	-0.2082	0	1.95	1.1827
Tb927.4.1260	hypothetical protein, conserved	ZUnknown	1	1318	277	48.8	58.6	60.5	31.6	55.9	39.8	1.54	1.05	1.52	1.05	0.4542	0	0	0.1644	0.0659	0	0	0	0	1.06	-0.1464	0	1.95	1.0496
Tb927.11.13200	LEM3 (ligand-effect modulator 3) family , beta subunit of flippase?	Lipids	1			303.6	248.4	249.2	177.1	146	182.9	1.71	1.7	1.36	1.36	0.669	0	0	-0.9657	5.45e-56	1	0	0	1	#N/A	0.044	0	1.95	1.0286
Tb927.11.10520	KKT2 kinetochore protein, tyrosine kinase, putative	Cell.cycle	1			53.6	31.2	240	83.1	80	193.9	0.65	0.39	1.24	0.39	-0.3959	0	0	0.0706	0.223	0	0	0	0	#N/A	0.1088	0	1.95	0.9709
Tb927.6.2760	hypothetical protein, conserved	ZUnknown	1.3			77.6	46.8	194.4	103.5	78.2	137.2	0.75	0.6	1.42	0.6	-0.1151	0	0	0.0018	0.98	0	0	0	0	#N/A	0.2082	0	1.95	1.0072
Tb927.9.10150	hypothetical protein, conserved	ZUnknown	1			40.9	26.1	92	51	55.8	79	0.8	0.47	1.16	0.47	-0.304	0	0	0.2158	0.00153	1	0	0	0	#N/A	-0.1942	0	1.95	1.0909
Tb927.3.3350	hypothetical protein, conserved	ZUnknown	1			42.8	33.1	125.7	44.5	72.9	88.1	0.96	0.45	1.43	0.45	-0.0791	0	0	-0.1265	0.0983	0	0	0	0	#N/A	-0.2694	0	1.95	1.0976
Tb927.11.16640	Uncharacterised protein family UPF0564, putative	ZUnknown	1			34.5	44	125.7	18.7	49	63	1.84	0.9	2	0.9	0.6599	0	0	-0.0123	0.882	0	0	0	0	#N/A	-0.4134	0	1.95	1.0976
Tb927.9.6720	Putative methyltransferase, putative	ZUnknown	1			20.9	12.4	45.1	37.6	27.9	40.7	0.56	0.44	1.11	0.44	-0.5077	0	0	-0.193	0.0743	0	0	0	0	#N/A	-0.2479	0	1.95	1.1043
Tb927.7.6330	hypothetical protein	ZUnknown	1			278.5	301.1	141	143.6	49.4	19.8	1.94	6.1	7.12	1.94	2.3372	0	0	0.9136	0.000188	1	0	1	0	#N/A	-0.4331	0	1.95	1.1309
Tb927.11.3260	mitochondrial DNA polymerase I protein D, putative (POLID)	Mito.DNA	1	6279	501	86.7	49.1	255.4	156	185.7	305.6	0.56	0.26	0.84	0.26	-0.8538	0	0	-0.3809	3.81e-20	1	0	0	0	0.97	-0.3037	0	1.94	1.2327
Tb927.8.7360	hypothetical protein, conserved	ZUnknown	1	5862	2746	59.5	53.7	163	78.3	107.5	137.2	0.76	0.5	1.19	0.5	-0.2922	0	0	-0.0265	0.749	0	0	0	0	0.89	-0.1754	0	1.94	1.1243
Tb927.10.6170	hypothetical protein, conserved	Mito.pathway	1	5586	114	47.8	26.8	232.9	81.1	69.9	127.9	0.59	0.38	1.82	0.38	-0.1047	0	0	-0.0024	0.973	0	0	0	0	1.22	-0.3099	0	1.94	1.2388
Tb927.8.3550	MAPK3 protein kinase	Protein.kinase	1	4668	1992	171.7	97.8	278.5	130.2	52.4	103.4	1.32	1.87	2.69	1.32	0.9709	0	0	0.0861	0.127	0	0	0	0	1.66	0.6107	0	1.94	1.144
Tb927.9.9520	ZC3H29	RNA.binding	1	4546	3438	133.1	130.4	356.5	155.9	106.8	117.4	0.85	1.22	3.04	0.85	0.7684	0	0	0.06	0.344	0	0	0	0	1.15	4.0246	0	1.94	1.0976
Tb927.7.7260	kinesin, putative (TbKIF9B)	Cytoskeleton	1.26	3776	416	55.4	59.4	180	57	90.4	148.8	0.97	0.66	1.21	0.66	-0.0791	0	0	0.0195	0.79	0	0	0	0	1.16	-0.2075	0	1.94	1.1243
Tb927.8.3560	DNA repair and recombination helicase protein PIF5	Mito.DNA	1	3262	223	90.4	45.8	174.2	122.8	103.7	167.6	0.74	0.44	1.04	0.44	-0.4344	0	0	-0.1697	0.00119	1	0	0	0	1.12	-0.112	0	1.94	1.2016
Tb927.11.14960	PUF7	rRNA.tRNA.process	1	3258	1024	86.6	29.7	85.1	93.3	61.6	78.6	0.93	0.48	1.08	0.48	-0.2688	0	0	-0.4044	5.44e-11	1	0	0	0	1.06	-0.2554	0	1.94	1.257
Tb927.6.2450	PKB protein kinase, putative	Protein.kinase	1	3204	1381	112.7	95.2	184.9	70.1	49.2	51.6	1.61	1.93	3.58	1.61	1.2469	0	0	0.2204	0.00184	1	0	0	0	1.02	1.0867	0	1.94	1.1043
Tb927.11.11340	gamma-tubulin complex subunit GCP3	Cytoskeleton	1.25	3053	703	88.2	47.3	154.2	103.4	80.5	117.1	0.85	0.59	1.32	0.59	-0.1203	0	0	-0.369	6.86e-10	1	0	0	0	0.98	-0.2675	0	1.94	1.1506
Tb927.10.3530	hypothetical protein, conserved	ZUnknown	1.21	2775	797	173.7	152.9	80.5	98.3	70.6	40.6	1.77	2.17	1.98	1.77	0.9806	0	0	0.0681	0.56	0	0	0	0	0.92	-0.4342	0	1.94	1.3219
Tb927.5.3590	Putative zinc finger motif, C2HC5-type/ASCH domain containing protein, putative	ZUnknown	1	2050	215	61.5	40.2	122.8	58.7	65.9	113.9	1.05	0.61	1.08	0.61	-0.1308	0	0	-0.1691	0.00911	1	0	0	0	1	-0.0902	0	1.94	0.9709
Tb927.4.810	ESAG5, putative	Flagellar pocket	1	1936	368	241.3	100.6	98.1	206.3	192.6	196.2	1.17	0.52	0.5	0.5	-0.454	0	0	-0.3764	5.24e-09	1	0	0	0	0.99	-0.2168	0	1.94	0.9855
Tb927.11.1640	hypothetical protein, conserved	ZUnknown	1	1676	320	38.6	88.1	54.4	28.5	45.2	40.4	1.35	1.95	1.35	1.35	0.6323	0	0	0.4904	4.45e-08	1	0	0	0	0.84	-0.2301	0	1.94	1.0704
Tb927.7.5510	hypothetical protein, conserved	ZUnknown	1	1508	428	20.3	13.5	52.5	23	21.6	25.1	0.88	0.63	2.09	0.63	0.263	0	0	-0.0473	0.674	0	0	0	0	1.24	-0.1869	0	1.94	1.144
Tb927.5.1380	hypothetical protein	ZUnknown	1	1506	597	100.9	139.6	83.5	65.4	49.6	35.5	1.54	2.81	2.35	1.54	1.1592	0	0	-0.0815	0.426	0	0	0	0	1.05	-0.2377	0	1.94	1.0144
Tb927.9.13540	hypothetical protein, conserved	Mito.pathway	1	1299	97	57.7	61.8	127.8	45.1	67.5	72.4	1.28	0.92	1.77	0.92	0.4042	0	0	0.1666	0.0218	1	0	0	0	1.02	-0.2447	0	1.94	1.189
Tb927.11.1520	ESAG3, putative	ESAG	1.04	1225	45	56.4	42.4	50.6	61.5	53.3	45	0.92	0.8	1.12	0.8	-0.0791	0	0	-0.0311	0.77	0	0	0	0	1.03	0.1466	0	1.94	1.2079
Tb927.9.4810	hypothetical protein, conserved	ZUnknown	1	987	62	38.7	36.6	46.9	18.5	28.1	28.5	2.09	1.3	1.65	1.3	0.7485	0	0	0.5297	6.14e-09	1	0	0	0	1.06	-0.0799	0	1.94	1.0286
Tb927.11.1400	hypothetical protein, conserved	Mito.pathway	1			66.6	34.3	123.7	68.1	60.3	124.3	0.98	0.57	1	0.57	-0.2345	0	0	-0.7756	1.67e-34	1	0	0	1	#N/A	-0.1497	0	1.94	1.0215
Tb927.10.11020	DNA mismatch repair protein, putative,MSH2 (MSH2)	DNA	1.64			98.8	59.4	197.9	105.4	97.5	146	0.94	0.61	1.36	0.61	-0.0439	0	0	0.0892	0.155	0	0	0	0	#N/A	-0.297	0	1.94	1.1763
Tb927.10.15650	tRNA pseudouridine synthase A-like protein	Mito.translation	1.97			31.1	22.4	79	41.8	56.9	62.6	0.74	0.39	1.26	0.39	-0.328	0	0	-0.0469	0.606	0	0	0	0	#N/A	-0.2444	0	1.94	1.2327
Tb927.8.3410	Possible protein tyrosine phosphatase	Protein.phosphatase	1			71.2	69.1	789.4	74.1	91.1	234.2	0.96	0.76	3.37	0.76	0.7627	0	0	-0.4884	1.08e-22	1	0	0	0	#N/A	1.0647	0	1.94	1.0496
Tb927.11.7120	exocyst complex component Sec15	Vesicular.transport	1			19.7	11.8	104.4	38.6	50.2	108.5	0.51	0.24	0.96	0.24	-0.811	0	0	0.0639	0.281	0	0	0	0	#N/A	-0.3744	0	1.94	1.0704
Tb927.3.1320	hypothetical protein, conserved	ZUnknown	1			39.4	30.6	176	85.1	89.4	172.3	0.46	0.34	1.02	0.34	-0.721	0	0	0.1404	0.00572	1	0	0	0	#N/A	-0.104	0	1.94	1.0909
Tb927.6.4270	hypothetical protein, conserved, NADH dehydrogenase?	ZUnknown	1			68.7	53.4	53	56.3	40.2	37.5	1.22	1.33	1.41	1.22	0.4005	0	0	-0.0639	0.558	0	0	0	0	#N/A	-0.1812	0	1.94	1.144
Tb927.11.10210	hypothetical protein, conserved	ZUnknown	1			67.2	40.8	173.3	66.7	78.4	132.8	1.01	0.52	1.3	0.52	-0.0842	0	0	-0.0151	0.821	0	0	0	0	#N/A	-0.2111	0	1.94	1.157
Tb927.8.540	N-terminal region of Chorein, a TM vesicle-mediated sorter, putative	ZUnknown	1	9024	1657	110.6	60.9	509.7	205.4	149.8	272.2	0.54	0.41	1.87	0.41	-0.0893	0	0	-0.745	2.92e-45	1	0	0	1	0.94	-0.0425	0	1.93	1.0635
Tb927.11.11880	conserved protein	ZUnknown	1	4752	466	107.7	58.2	279.4	174.8	189.3	351.5	0.62	0.31	0.79	0.31	-0.8026	0	0	-0.1455	0.00498	1	0	0	0	1.11	-0.1119	0	1.93	1.0704
Tb927.7.670	hypothetical protein, conserved	ZUnknown	1.07	4022	1510	52.7	44.5	141.7	52.5	64.8	97.7	1	0.69	1.45	0.69	0.0658	0	0	0.0709	0.328	0	0	0	0	0.53	1.7011	0	1.93	1.0635
Tb927.11.16960	hypothetical protein, conserved	ZUnknown	1	3654	38	51.5	46.1	230.2	51.1	54.2	88.1	1.01	0.85	2.61	0.85	0.5753	0	0	-0.2277	0.000352	1	0	0	0	0.88	-0.0533	0	1.93	1.3161
Tb927.9.12780	Leucine carboxyl methyltransferase/Cupin-like domain containing protein, putative	ZUnknown	1	3507	136	67.5	42	158.2	103.9	77.1	121.4	0.65	0.54	1.3	0.54	-0.2688	0	0	0.0561	0.355	0	0	0	0	1.07	-0.211	0	1.93	1.0144
Tb927.11.6910	hypothetical protein, conserved	ZUnknown	1	3281	491	94.5	112.1	237.3	134.1	127.2	147.2	0.7	0.88	1.61	0.7	0.0886	0	0	0.0214	0.743	0	0	0	0	1	-0.4624	0	1.93	1.0841
Tb927.7.4920	hypothetical protein, conserved	ZUnknown	1.82	2663	375	164	220.6	557.5	154.4	195.3	209.9	1.06	1.13	2.66	1.06	0.693	0	0	0.1077	0.0761	0	0	0	0	1.13	-0.0219	0	1.93	1.0566
Tb927.2.1740	hypothetical protein, conserved	ZUnknown	1	2505	1882	31.8	45.8	74	21.1	11.2	13.4	1.51	4.09	5.52	1.51	1.8901	0	0	0.2639	0.0252	1	0	0	0	1.09	0.6013	0	1.93	1.3391
Tb927.11.14550	PPPDE putative peptidase domain containing protein, putative	ZUnknown	1	2360	313	194.2	187.4	242.5	138.1	70.7	91.9	1.41	2.65	2.64	1.41	1.1592	0	0	0.263	4.26e-05	1	0	0	0	0.98	-0.1266	0	1.93	1.3161
Tb927.10.4870	tRNA-dihydrouridine synthase 2, putative	rRNA.tRNA.process	1.31	2326	927	45	27.9	74.6	47.2	36.6	38.9	0.95	0.76	1.92	0.76	0.275	0	0	-0.0479	0.65	0	0	0	0	1.12	-0.3796	0	1.93	1.275
Tb927.1.4380	Putative integral membrane protein conserved region (DUF2404), putative	ZUnknown	1	2131	360	56	35.9	79	44.8	61.1	74.5	1.25	0.59	1.06	0.59	-0.0489	0	0	0.0035	0.968	0	0	0	0	1.02	-0.1517	0	1.93	1.0286
Tb927.2.2830	hypothetical protein, conserved	ZUnknown	1	2035	488	184.6	200.7	150	144.8	48.7	34.6	1.27	4.12	4.34	1.27	1.6975	0	0	-0.5918	1.94e-13	1	0	0	1	0.97	0.0462	0	1.93	1.0144
Tb927.11.15050	Cation efflux family, putative	ZUnknown	1	1852	410	98	60.4	95.5	146.5	92.7	104.4	0.67	0.65	0.91	0.65	-0.4279	0	0	0.0708	0.325	0	0	0	0	1.06	-0.0804	0	1.93	1.1243
Tb927.10.1300	hypothetical protein, conserved, no homologues	ZUnknown	1	1686	396	58.5	87.7	106.8	67.5	36.2	29.5	0.87	2.42	3.62	0.87	1.2037	0	0	0.0057	0.965	0	0	0	0	1.06	-0.1406	0	1.93	1.4168
Tb927.7.4280	hypothetical protein, conserved	ZUnknown	1.13	1492	773	186.2	252.6	69.1	92.4	65.1	44.5	2.02	3.88	1.55	1.55	1.3123	0	0	0.4333	4.14e-08	1	0	0	0	1.13	-0.3601	0	1.93	0.9561
Tb927.7.1080	hypothetical protein, conserved	Mito.pathway	1	1422	138	59.6	89.5	88.1	35.2	49	46.9	1.69	1.83	1.88	1.69	0.848	0	0	0.0018	0.986	0	0	0	0	1.19	0.0582	0	1.93	0.9782
Tb927.11.15290	eRF1 methyltransferase catalytic subunit, putative	Translation	1	1095	279	9.7	8.5	46.7	14.2	13.9	23.5	0.68	0.61	1.99	0.61	0.1287	0	0	0.0565	0.608	0	0	0	0	1.26	-0.284	0	1.93	1.2203
Tb927.10.9770	gamma-tubulin complex subunit GCP2	Cytoskeleton	1.51			69.5	45.1	134.7	84.2	97.3	123.6	0.83	0.46	1.09	0.46	-0.334	0	0	0.0814	0.187	0	0	0	0	#N/A	-0.0984	0	1.93	1.0704
Tb927.11.5650	replication factor C large subunit, putative	DNA	1			122	86.6	112.4	204.2	124.1	145.1	0.6	0.7	0.77	0.6	-0.5353	0	0	0.2214	4.61e-05	1	0	0	0	#N/A	-0.2931	0	1.93	0.9855
Tb927.4.1510	phospholipid-translocating ATPase, putative	Lipids	1			129.9	55.5	220.5	205.1	204.5	297.2	0.63	0.27	0.74	0.27	-0.8713	0	0	0.1374	0.00681	1	0	0	0	#N/A	-0.2822	0	1.93	1.144
Tb927.10.10840	ESP15 Enriched in surface-labeled proteome	Vesicular.transport	1.15			63.3	60	160	63.4	98.2	132.4	1	0.61	1.21	0.61	-0.0893	0	0	0.0521	0.458	0	0	0	0	#N/A	0.0681	0	1.93	1.2327
Tb927.7.7030	zinc-finger of a C2HC-type, putative	Zinc.finger	1			39.3	37.7	80.9	20.1	34.6	62.5	1.96	1.09	1.29	1.09	0.5327	0	0	-0.2479	0.000485	1	0	0	0	#N/A	1.0373	0	1.93	1.0072
Tb927.3.2120	hypothetical protein, conserved	ZUnknown	1			28.7	17.2	43.5	47.5	32.9	44.2	0.6	0.52	0.98	0.52	-0.5146	0	0	-0.0381	0.736	0	0	0	0	#N/A	-0.2613	0	1.93	1.0841
Tb927.5.2920	Ring finger domain containing protein, putative	ZUnknown	1			62.3	48.8	63.5	61	44.3	39.1	1.02	1.1	1.62	1.02	0.3181	0	0	0.0762	0.451	0	0	0	0	#N/A	-0.17	0	1.93	1.0909
Tb927.4.4240	hypothetical protein, conserved	ZUnknown	3.08			180.9	166.8	295.6	115.8	112.7	119.2	1.56	1.48	2.48	1.48	0.8797	0	0	0.1311	0.0533	0	0	0	0	#N/A	-0.0532	0	1.93	1.157
Tb927.3.810	hypothetical protein, conserved	ZUnknown	1			30.1	30.5	51.5	28.4	42.6	34.4	1.06	0.72	1.5	0.72	0.1287	0	0	0.2308	0.0151	1	0	0	0	#N/A	-0.146	0	1.93	1.1763
Tb927.10.460	NRKC NIMA-related protein kinase	Protein.kinase	1.07	3842	1099	49.1	70.5	159.5	33.3	38.5	69.9	1.47	1.83	2.28	1.47	0.8953	0	0	-0.056	0.41	0	0	0	0	1.17	-0.6683	1	1.92	0.9561
Tb927.10.12440	kinesin, putative	Cytoskeleton	1.27	2762	131	36.3	24.3	82.4	51.1	46.7	65.7	0.71	0.52	1.25	0.52	-0.2746	0	0	-0.177	0.00807	1	0	0	0	0.91	-0.3416	0	1.92	0.9855
Tb927.10.10670	kinetoplastid-specific dual specificity phosphatase, putative	Phosphatase	1	2611	1160	41.4	72.8	94.5	42.3	23.1	21.5	0.98	3.15	4.4	0.98	1.5076	0	0	0.1932	0.0851	0	0	0	0	1.17	-0.571	0	1.92	1.2203
Tb927.9.11520	hypothetical protein, conserved	ZUnknown	1	2397	507	26.9	25.9	88.2	40.3	32	39.8	0.67	0.81	2.22	0.67	0.3026	0	0	0.1831	0.0226	1	0	0	0	1.28	-0.1497	0	1.92	1.2987
Tb927.9.12160	hypothetical protein, conserved	ZUnknown	1	2039	242	46.4	50.2	138.4	51	52.6	77.4	0.91	0.95	1.79	0.91	0.2829	0	0	0.0327	0.657	0	0	0	0	1.2	-0.2449	0	1.92	0.9855
Tb927.9.15650	hypothetical protein	ZUnknown	1	1722	619	183.6	439.6	107.4	111.4	87.9	59.7	1.65	5	1.8	1.65	1.494	0	0	-0.0004	0.996	0	0	0	0	1.05	0.1815	0	1.92	1.0356
Tb927.10.2820	hypothetical protein, conserved	ZUnknown	1	1675	143	36.4	39.6	79.3	46.6	32.9	25.7	0.78	1.2	3.09	0.78	0.757	0	0	0.2663	0.00661	1	0	0	0	1.11	-0.1956	0	1.92	1.4114
Tb927.9.15100	hypothetical protein, tryp specific	ZUnknown	1	1395	23	39.6	37	42.5	50.1	63.2	41.4	0.79	0.59	1.03	0.59	-0.3159	0	0	0.3821	1.04e-06	1	0	0	0	0.96	0.0105	0	1.92	1.2203
Tb927.11.1240	hypothetical protein, conserved	ZUnknown	1	1348	68	111.6	61.3	69.8	101	53.9	58.2	1.1	1.14	1.2	1.1	0.1974	0	0	0.1317	0.16	0	0	0	0	1	-0.0995	0	1.92	1.1177
Tb927.3.1070	RF1 Mitochondrial peptide chain release factor 1	Mito.translation	1	1347		40.1	35.9	96.7	36.3	44.2	68.4	1.1	0.81	1.41	0.81	0.1462	0	0	0.314	3.19e-06	1	0	0	0	1.68	0.0309	0	1.92	1.0635
Tb927.3.4440	hypothetical protein, conserved	ZUnknown	1	1243	60	70.2	58.1	55.8	84.8	64.1	61.5	0.83	0.91	0.91	0.83	-0.179	0	0	-0.0501	0.534	0	0	0	0	0.96	-0.1	0	1.92	1.0566
Tb927.10.3620	Laminin-like protein, putative	ZUnknown	1	1212	199	176.1	464.2	242.7	90.4	111.3	120.8	1.95	4.17	2.01	1.95	1.4383	0	0	0.2739	2.94e-05	1	0	0	0	1.11	0.6014	0	1.92	1.0566
Tb927.11.12250	DNA replication licensing factor MCM4	DNA	1			53.6	27.3	110.3	71.9	68.8	78.1	0.75	0.4	1.41	0.4	-0.2288	0	0	-0.0217	0.805	0	0	0	0	#N/A	-0.2828	0	1.92	1.281
Tb927.3.4420	hypothetical protein, conserved, alpha/beta hydrolase domain	Enzyme	1			53.6	44	110.4	68.1	75.9	107.2	0.79	0.58	1.03	0.58	-0.3219	0	0	-0.0619	0.413	0	0	0	0	#N/A	-0.2541	0	1.92	1.1635
Tb927.11.5410	hypothetical protein, conserved	ZUnknown	1			49.5	27.8	100.5	35.1	28.2	55	1.41	0.99	1.83	0.99	0.4957	0	0	0.033	0.694	0	0	0	0	#N/A	-0.1374	0	1.92	1
Tb927.9.8320	hypothetical protein	ZUnknown	1		610	72.5	95.1	58.7	67.4	37.6	34.5	1.08	2.53	1.7	1.08	0.8237	0	0	0.4085	0.0631	0	0	0	0	0.71	0.4264	0	1.92	1.0215
Tb927.11.6410	hypothetical protein, conserved	ZUnknown	1			65.6	26.3	240.3	103.5	119.2	269.9	0.63	0.22	0.89	0.22	-0.7859	0	0	0.0022	0.972	0	0	0	0	#N/A	-0.2069	0	1.92	1.0215
Tb927.11.10580	COG (conserved oligomeric Golgi) complex component, COG2/Domain of unknown function (DUF3510), putative	ZUnknown	1			31.1	10.2	120	58	36	115.1	0.54	0.28	1.04	0.28	-0.6897	0	0	0.1238	0.0491	1	0	0	0	#N/A	-0.3727	0	1.92	1.0976
Tb927.11.3300	SAS4	Cytoskeleton	1	6201	2677	94.4	75	279.3	74.3	53.8	124.1	1.27	1.39	2.25	1.27	0.7108	0	0	-0.2581	1.27e-05	1	0	0	0	1.01	1.1999	0	1.91	1.144
Tb927.4.1090	endosomal integral membrane protein, putative	Vesicular.transport	1	2405	319	127.6	75.7	92	111.4	131.1	141.8	1.15	0.58	0.65	0.58	-0.334	0	0	0.0349	0.636	0	0	0	0	0.84	-0.0847	0	1.91	1.0286
Tb927.10.4130	NADH-ubiquinone oxidoreductase complex I subunit, putative,NDUFA5/B13 subunit	Mito.e.transport	1	2157	1070	43.5	40.2	50	40.6	45.4	44.3	1.07	0.89	1.13	0.89	0.0426	0	0	0.5367	5.76e-11	1	0	0	0	1.01	-0.1264	0	1.91	1.0496
Tb927.11.7870	hypothetical protein, conserved	ZUnknown	1	2094	302	85.3	125.1	155.5	56.6	68.7	88.8	1.51	1.82	1.75	1.51	0.7599	0	0	0.0358	0.643	0	0	0	0	1.18	0.032	0	1.91	1.0496
Tb927.4.1970	Domain of unknown function DUF21, putative	ZUnknown	1	2031	220	147.2	114.7	117.5	203.8	145.5	113.5	0.72	0.79	1.04	0.72	-0.2345	0	0	0.1673	0.0114	1	0	0	0	1.2	-0.1361	0	1.91	1.0909
Tb927.6.2810	ABC transporter, putative	Transporter	1	1854	244	74.3	65.2	83.7	76.5	50.7	41.2	0.97	1.29	2.03	0.97	0.516	0	0	0.3505	1.82e-05	1	0	0	0	1.26	-0.1048	0	1.91	1.0704
Tb927.4.3440	BB50	Cytoskeleton	1	1779	400	21.1	19	71.6	23	40.9	54.2	0.92	0.46	1.32	0.46	-0.152	0	0	0.0374	0.691	0	0	0	0	1.13	-0.2925	0	1.91	1.0909
Tb927.8.6290	hypothetical protein, conserved	ZUnknown	1	1633	314	113.1	104	160.5	128.3	101.7	90.3	0.88	1.02	1.78	0.88	0.2947	0	0	0.1916	0.006	1	0	0	0	0.99	-0.1731	0	1.91	1.1635
Tb927.10.9290	AAA domain containing protein, putative	ZUnknown	1.07	1535	353	52.7	137	117.4	41.3	71	61.7	1.28	1.93	1.9	1.28	0.7684	0	0	0.3097	2.46e-06	1	0	0	0	1.14	-0.2706	0	1.91	1.0356
Tb927.10.7730	Domain of unknown function (DUF4496), putative	ZUnknown	1.91	1422	124	48.9	43	52.5	66.9	73.4	70.8	0.73	0.59	0.74	0.59	-0.5423	0	0	0.0111	0.91	0	0	0	0	0.87	-0.091	0	1.91	1.1506
Tb927.3.3250	hypothetical protein, conserved	ZUnknown	1	1207	184	22.6	22.4	55.7	14.9	37.2	35.6	1.52	0.6	1.56	0.6	0.2947	0	0	-0.1162	0.284	0	0	0	0	0.87	-0.213	0	1.91	1.2203
Tb927.8.6510	TbNedd8-conjugating enzyme E2 (TbUbc12)	Ubiquitin.proteasome	1	826	125	35.2	22.5	24.6	31.9	23.3	27.2	1.1	0.97	0.9	0.9	-0.0145	0	0	-0.5344	4.19e-06	1	0	0	0	0.87	-0.0752	0	1.91	1.0144
Tb927.7.1000	DNA repair and recombination helicase protein PIF8	Mito.DNA	1			38.4	21	100.9	42.6	47.2	118.1	0.9	0.44	0.85	0.44	-0.454	0	0	-0.1868	0.00176	1	0	0	0	#N/A	-0.2026	0	1.91	0.9709
Tb927.1.1160	PPR3	Mito.translation	1.19			50.8	30.8	81.5	54.2	48.2	48.7	0.94	0.64	1.67	0.64	0.1155	0	0	0.1122	0.169	0	0	0	0	#N/A	-0.1607	0	1.91	1.0426
Tb927.6.670	RRP45 exosome complex PH subunit	RNA.degradation	1			38.4	21.4	47.2	54.2	34	33.6	0.71	0.63	1.4	0.63	-0.1308	0	0	-0.1284	0.157	0	0	0	0	#N/A	-0.1708	0	1.91	1.1506
Tb927.11.5740	formin-like protein	ZUnknown	1			41.5	20.1	104.7	62.3	51.8	114.1	0.67	0.39	0.92	0.39	-0.5995	0	0	-0.0177	0.802	0	0	0	0	#N/A	-0.4321	0	1.91	0.9855
Tb927.7.5060	CLN3 protein, putative	ZUnknown	2.01			225.3	137.3	161.7	257.1	152.8	162.1	0.88	0.9	1	0.88	-0.1099	0	0	-0.4449	4.46e-15	1	0	0	0	#N/A	-0.4392	0	1.91	1.0286
Tb927.11.15520	hypothetical protein, conserved	ZUnknown	1			48.1	23.8	146.9	68.9	51.9	81.3	0.7	0.46	1.81	0.46	-0.0145	0	0	-0.0269	0.727	0	0	0	0	#N/A	-0.1514	0	1.91	1.1043
Tb927.4.3800	hypothetical protein, conserved	ZUnknown	1.59			91.8	81.5	64.8	68.5	33.4	37.7	1.34	2.44	1.72	1.34	0.8745	0	0	-0.491	2.92e-08	1	0	0	0	#N/A	-0.4512	0	1.91	1.1043
Tb927.10.8100	hypothetical protein, conserved	ZUnknown	1			41.1	32.7	65.8	60.3	50.9	40.1	0.68	0.64	1.64	0.64	-0.0194	0	0	0.1445	0.0889	0	0	0	0	#N/A	-0.1565	0	1.91	1.1243
Tb927.7.5720	hypothetical protein, conserved	ZUnknown	1			24.6	22.7	60.9	29.9	37.6	36.2	0.82	0.6	1.68	0.6	0.0473	0	0	-0.1753	0.0626	0	0	0	0	#N/A	-0.0769	0	1.91	1.1375
Tb927.11.16700	hypothetical protein, conserved	ZUnknown	1			101.3	52	200	179	128.8	169.1	0.57	0.4	1.18	0.4	-0.4806	0	0	0.037	0.597	0	0	0	0	#N/A	-0.3043	0	1.91	1.157
Tb927.9.5700	hypothetical protein, conserved	ZUnknown	1.05	7001	429	42.9	22.3	286.2	93.3	103.2	262.6	0.46	0.22	1.09	0.22	-0.7612	0	0	0.1489	0.00197	1	0	0	0	1.18	-0.0931	0	1.9	1.0426
Tb927.8.1280	hypothetical protein, conserved	ZUnknown	1	6551	1838	86	63.5	467.6	91.8	85.7	184.3	0.94	0.74	2.54	0.74	0.4923	0	0	-0.3299	3.09e-11	1	0	0	0	1.36	-0.0703	0	1.9	1.0072
Tb927.1.3250	hypothetical protein, myosin heavy-chain like	Cytoskeleton	1	6007	481	38.2	27.5	154.1	81.4	120.9	246.4	0.47	0.23	0.63	0.23	-1.1735	0	0	-0.0191	0.779	0	0	0	0	1.07	-0.2944	0	1.9	1.0566
Tb927.11.4510	Sister chromatid cohesion C-terminus, putative	ZUnknown	1	5900	484	43.3	21.3	354.1	88.8	97.9	249.6	0.49	0.22	1.42	0.22	-0.4941	0	0	-0.0541	0.28	0	0	0	0	1.13	-0.1033	0	1.9	1.0426
Tb927.3.3550	hypothetical protein, conserved	ZUnknown	1	4855	1349	36.7	28.4	236.9	45.5	51.7	116.8	0.81	0.55	2.03	0.55	0.1763	0	0	0.0462	0.457	0	0	0	0	1.3	0.829	0	1.9	1.2203
Tb927.11.10730	SNF2 DNA repair protein, putative,ATP-dependent helicase, putative,SNF2 family helicase, putative	DNA	1	4360	537	49.6	29.9	182.1	92.1	113.4	211.6	0.54	0.26	0.86	0.26	-0.8538	0	0	0.1111	0.0288	1	0	0	0	1.07	-0.3248	0	1.9	1.0772
Tb927.10.14880	hypothetical protein, conserved	ZUnknown	1.17	3267	705	48	24.4	103.1	52.5	53.3	83.4	0.91	0.46	1.24	0.46	-0.2009	0	0	0.0237	0.744	0	0	0	0	1.07	-0.1904	0	1.9	1.0426
Tb927.7.5650	Kinesin-4/10	Cytoskeleton	1	3106	458	45.3	38.2	48	51.8	38.2	48.9	0.87	1	0.98	0.87	-0.074	0	0	-0.207	0.00627	1	0	0	0	0.98	-0.2196	0	1.9	0.9855
Tb927.11.12170	hypothetical protein, conserved	ZUnknown	1	2057	273	27.1	24.9	61.9	32.4	37.8	41	0.84	0.66	1.51	0.66	0.0048	0	0	-0.0986	0.261	0	0	0	0	1.01	-0.1322	0	1.9	1.257
Tb927.10.10870	protein kinase MAPKLK1	Protein.kinase	1	1853	81	61.9	34.8	111.8	69.2	47.9	74.2	0.89	0.73	1.51	0.73	0.0612	0	0	0.1492	0.0364	1	0	0	0	1.07	-0.1171	0	1.9	1.0772
Tb927.11.2580	POMP11	Mito.membrane	1	1507	227	23.9	12.1	43.3	23.2	23.4	34.4	1.03	0.52	1.26	0.52	-0.0944	0	0	0.4181	5.79e-08	1	0	0	0	1.11	-0.1185	0	1.9	1.1699
Tb927.9.8500	hypothetical protein	ZUnknown	1	1334	252	103.7	99.8	89.5	64.6	81.2	43.9	1.61	1.23	2.04	1.23	0.7019	0	0	0.2785	0.000964	1	0	0	0	1.17	-0.1204	0	1.9	1.4436
Tb927.10.760	hypothetical protein, conserved	Mito.pathway	1			93.2	205	100	61.6	36.6	24.1	1.51	5.6	4.15	1.51	1.9082	0	0	-0.1135	0.256	0	0	0	0	#N/A	0.0186	0	1.9	0.9486
Tb927.1.1330	Mitochondrial Editosome-like Complex TUTase (MEAT1)	Mito.RNA	1.89			31.5	26.2	60.7	47.7	53.1	58.5	0.66	0.49	1.04	0.49	-0.454	0	0	0.1138	0.154	0	0	0	0	#N/A	-0.1011	0	1.9	1.1177
Tb927.2.1860	REMC2 mitochondrial RNA binding complex 1 subunit (MRB1860)	Mito.RNA	1			72.9	72.8	247	54	57.2	94	1.35	1.27	2.63	1.27	0.8074	0	0	0.0331	0.639	0	0	0	0	#N/A	-0.1137	0	1.9	1.275
Tb927.8.3170	kinetoplast ribosomal PPR-repeat containing protein 9	Mito.translation	1			45.8	33.9	103	68.6	83.7	111.4	0.67	0.41	0.92	0.41	-0.585	0	0	-0.1503	0.012	1	0	0	0	#N/A	-0.1064	0	1.9	1.0566
Tb927.6.3190	hypothetical protein, conserved	ZUnknown	1			57.2	50	61.8	57.1	74	61.1	1	0.68	1.01	0.68	-0.1574	0	0	0.0883	0.233	0	0	0	0	#N/A	-0.1176	0	1.9	1.0909
Tb927.10.2780	DNA-directed RNA polymerase iii largest subunit,t (RPC160)	RNA.synthesis	1.49	5257	567	62.8	37.3	219.8	110.1	110.1	173.5	0.57	0.34	1.27	0.34	-0.4606	0	0	-0.1864	0.000112	1	0	0	0	1.12	-0.1173	0	1.89	0.9561
Tb927.8.8270	hypothetical protein, conserved	ZUnknown	1	4725	1837	93.9	136.4	248.1	99.6	65.2	89.1	0.94	2.09	2.78	0.94	0.9536	0	0	-1.5336	2.26e-128	1	0	0	1	1.03	0.1028	0	1.89	1.0144
Tb927.3.4060	asparagine synthase, putative	ZUnknown	1	4409	43	23.5	11.2	102	34.1	42.4	65.2	0.69	0.26	1.56	0.26	-0.2573	0	0	0.0742	0.315	0	0	0	0	1.16	-0.187	0	1.89	1.111
Tb927.9.4310	tricarboxylate carrier, putative	Mito.membrane	1	3957	2788	43.5	46	204.5	38.7	28.2	33.3	1.12	1.63	6.14	1.12	1.5672	0	0	1.332	6.07e-94	1	0	1	0	1.72	1.0601	0	1.89	1.1635
Tb927.8.5080	fatty-acid amide hydrolase 2, putative, amidase, putative	Lipids	1	3635	1791	85.1	59.4	159.5	125	108.6	133.3	0.68	0.55	1.2	0.55	-0.304	0	0	0.3449	1.07e-09	1	0	0	0	1.13	0.3465	0	1.89	1.0426
Tb927.11.9260	hypothetical protein, conserved	ZUnknown	1	2606	802	25	39.5	65.5	19.1	33.4	32.6	1.31	1.18	2.01	1.18	0.585	0	0	-0.3312	0.000154	1	0	0	0	1.01	0.0088	0	1.89	1.0635
Tb927.4.5040	dihydrolipoamide dehydrogenase, putative	Enzyme	1.03	2394	619	36.7	40.3	89	30	33	43.1	1.22	1.22	2.06	1.22	0.585	0	0	0.2582	0.00206	1	0	0	0	1.22	-0.033	0	1.89	1.3391
Tb927.1.4470	hypothetical protein, conserved	ZUnknown	1	1787	271	50.6	45.8	85.7	57	60.5	53.7	0.89	0.76	1.6	0.76	0.1155	0	0	-0.0631	0.467	0	0	0	0	1	-0.2863	0	1.89	1.1635
Tb927.11.2720	hypothetical protein, conserved	ZUnknown	2.13	1597	159	47.6	40.2	78.3	75.9	73.3	55.6	0.63	0.55	1.41	0.55	-0.212	0	0	-0.0404	0.671	0	0	0	0	0.88	-0.0916	0	1.89	1.0356
Tb927.10.11160	NFU2	Mito.pathway	1	1204	166	50.8	39.1	66.5	72.3	56	56	0.7	0.7	1.19	0.7	-0.212	0	0	0.1851	0.0144	1	0	0	0	0.98	-0.3069	0	1.89	1.0426
Tb927.10.9810	hypothetical protein, conserved	Mito.pathway	1	1161	73	87.9	54.3	56.7	96.8	71.6	44.9	0.91	0.76	1.26	0.76	-0.0341	0	0	0.3043	0.000144	1	0	0	0	0.85	-0.2858	0	1.89	1.2388
Tb927.4.4090	hypothetical protein, conserved	ZUnknown	1	1091	94	43.5	29.3	38.6	48.7	29.8	34	0.89	0.98	1.14	0.89	0.0048	0	0	-0.303	0.00125	1	0	0	0	1.27	-0.028	0	1.89	1.0215
Tb927.9.9190	exocyst complex component Exo70	Vesicular.transport	1.02			94.9	60	102.2	91.4	65.4	126.4	1.04	0.92	0.81	0.81	-0.1151	0	0	-0.705	2.32e-32	1	0	0	1	#N/A	-0.1109	0	1.89	0.9336
Tb927.11.9170	DNA topoisomerase III, putative	DNA	1			61.7	33.1	139.4	86	63.8	105.4	0.72	0.52	1.32	0.52	-0.2288	0	0	-0.2608	5.41e-07	1	0	0	0	#N/A	-0.2464	0	1.89	1.0356
Tb927.11.13380	VEX2 putative RNA helicase, VEX1 partner	RNA.synthesis	1			59.2	39.3	460.1	174	202	396.9	0.34	0.19	1.16	0.19	-0.8279	0	0	-0.2005	1.19e-05	1	0	0	0	#N/A	-0.3497	0	1.89	1
Tb927.5.1910	hypothetical protein, conserved	ZUnknown	1			44.2	27.9	139.8	78.3	111.3	147.5	0.56	0.25	0.95	0.25	-0.7694	0	0	-0.412	1.1e-15	1	0	0	0	#N/A	-0.1446	0	1.89	1.0286
Tb927.10.13150	hypothetical protein, conserved	ZUnknown	1			35.2	26.3	104.6	50.8	67.8	109.4	0.69	0.39	0.96	0.39	-0.5564	0	0	0.102	0.14	0	0	0	0	#N/A	-0.2966	0	1.89	1.0496
Tb927.10.1180	hypothetical protein, conserved	ZUnknown	1.48			33	29.4	53	36.4	51.7	52.2	0.91	0.57	1.02	0.57	-0.263	0	0	0.1302	0.0951	0	0	0	0	#N/A	-0.1077	0	1.89	1.0496
Tb927.8.6690	RECQ2 ATP-dependent DEAD/H DNA helicase	DNA	1	5566	680	70.5	26.6	288	72.8	67.9	189.9	0.97	0.39	1.52	0.39	-0.0589	0	0	-0.275	5.82e-08	1	0	0	0	1.09	-0.1893	0	1.88	0.9709
Tb927.4.1870	kinetoplastid-specific phospho-protein phosphatase, putative	Protein.phosphatase	1	4276	2626	233.4	360.3	312.3	166.2	102.4	100	1.4	3.52	3.12	1.4	1.4222	0	0	-0.0421	0.582	0	0	0	0	1.14	0.2016	0	1.88	1.0496
Tb927.10.5880	Proteophosphoglycan, putative	ZUnknown	1	3973	1925	77.1	71.1	254.4	67.6	66.1	121.3	1.14	1.08	2.1	1.08	0.5261	0	0	0.8157	1.44e-65	1	0	1	0	1.45	0.2207	0	1.88	1.0566
Tb927.10.7280	pre-mRNA splicing factor ATP-dependent RNA helicase, putative	RNA.processing	1	3347	79	47.6	33.1	162.1	85.3	95.3	122.3	0.56	0.35	1.33	0.35	-0.4215	0	0	0.2076	0.000171	1	0	0	0	1.22	-0.1282	0	1.88	1.0286
Tb927.9.6150	protein phosphatase 2A regulatory subunit, putative	Protein.phosphatase	1	2826	236	120.2	97.4	198	116.6	85.8	114.6	1.03	1.14	1.73	1.03	0.3785	0	0	0.1704	0.00828	1	0	0	0	1.17	-0.2387	0	1.88	1.0072
Tb927.11.4000	hypothetical protein, conserved	ZUnknown	1	2751	815	73.8	61.3	142.2	49.1	71.3	116.5	1.5	0.86	1.22	0.86	0.255	0	0	-0.2793	1.51e-06	1	0	0	0	1.04	-0.3741	0	1.88	0.9561
Tb927.11.9890	signal recognition particle receptor alpha subunit, putative	Vesicular.transport	1	2671	877	43.2	20.6	90	63.9	84.1	124.7	0.68	0.24	0.72	0.24	-0.8713	0	0	-0.0423	0.538	0	0	0	0	1.02	-0.2159	0	1.88	1.0772
Tb927.2.2410	hypothetical protein, conserved	ZUnknown	1	2310	287	36.6	24.4	89.8	35.4	41.4	55.5	1.03	0.59	1.62	0.59	0.111	0	0	-0.3822	4.66e-07	1	0	0	0	1.12	-0.1661	0	1.88	1.1375
Tb927.10.960	U4/U6-specific protein PRP4	RNA.processing	2.1	2025	126	23	12.6	49.1	25.6	28.8	42.1	0.9	0.44	1.17	0.44	-0.2573	0	0	-0.1428	0.0645	0	0	0	0	1.11	-0.3748	0	1.88	1.0635
Tb927.9.6660	hypothetical protein, conserved	ZUnknown	1	1927	20	24	20.7	58.4	31.7	25.3	40.2	0.76	0.82	1.45	0.76	0.0144	0	0	0.1041	0.301	0	0	0	0	1.24	-0.0322	0	1.88	1.1043
Tb927.3.5260	hypothetical protein, conserved	ZUnknown	1	1738	261	176.8	322.7	216.7	106	89.4	62.6	1.67	3.61	3.46	1.67	1.5427	0	0	-0.1183	0.117	0	0	0	0	1.13	0.2506	0	1.88	1.0841
Tb927.11.16860	mitochondrial RNA binding protein (MRB8620)	Mito.RNA	1	1732	230	42	25.9	65.5	44.1	43.2	47.5	0.95	0.6	1.38	0.6	-0.0341	0	0	0.1322	0.0856	0	0	0	0	0.94	-0.2022	0	1.88	1.2141
Tb927.3.1530	CorA-like Mg2+ transporter protein, putative	ZUnknown	1.26	1696	288	97.8	102.8	176.8	87.7	39.9	59.7	1.12	2.58	2.96	1.12	1.1506	0	0	0.3216	0.000239	1	0	0	0	0.92	-0.1971	0	1.88	1.0635
Tb927.10.2310	hypothetical protein, conserved	ZUnknown	1	1625	134	76.5	34.9	56.6	113.3	59.8	53.3	0.68	0.58	1.06	0.58	-0.3708	0	0	-0.3477	5.22e-06	1	0	0	0	1.02	-0.1559	0	1.88	0.9561
Tb927.11.10320	TatD related DNase, putative	ZUnknown	1	1463	200	42	30.4	47.2	30.1	47.3	40.8	1.4	0.64	1.16	0.64	0.0931	0	0	0.1916	0.0271	1	0	0	0	1.02	-0.162	0	1.88	1.0704
Tb927.3.4900	tRNA isopentenyltransferase, putative	rRNA.tRNA.process	1	1438	19	59	56.2	81.4	68.8	66.7	52.5	0.86	0.84	1.55	0.84	0.1155	0	0	-0.056	0.537	0	0	0	0	#N/A	-0.0273	0	1.88	0.9709
Tb927.9.8250	atypical dual specificity phosphatase, putative	Phosphatase	1	1412	45	67.8	53.2	80	74.3	78.6	60.7	0.91	0.68	1.32	0.68	-0.0439	0	0	0.0501	0.563	0	0	0	0	0.91	-0.1864	0	1.88	1.0215
Tb927.8.2180	hypothetical protein, conserved	ZUnknown	1	758	109	22.5	23.2	22.9	24.4	24.5	17.5	0.92	0.95	1.31	0.92	0.0841	0	0	0.155	0.27	0	0	0	0	0.56	-0.2723	0	1.88	1.0426
Tb927.1.2700	hypothetical protein, conserved	ZUnknown	1			107.9	97.7	79.5	77.3	61.3	53.8	1.4	1.59	1.48	1.4	0.5753	0	0	-0.7272	6.71e-18	1	0	0	1	#N/A	0.0002	0	1.88	1.1043
Tb927.11.7220	C-terminal BEACH domains, role in protein sorting, similar to yeast Bph1 but not top hit.	Lysosome	1.92			92.2	47.1	848.7	208	204.2	513.2	0.44	0.23	1.65	0.23	-0.3708	0	0	0.0494	0.294	0	0	0	0	#N/A	-0.1153	0	1.88	0.9561
Tb927.9.12770	TPR repeat protein	Mito.pathway	1			78.5	39	131	114.9	75.4	149.4	0.68	0.52	0.88	0.52	-0.5284	0	0	0.1133	0.0474	1	0	0	0	#N/A	-0.0697	0	1.88	1
Tb927.10.940	hypothetical protein, conserved, kinetoplastid-specific	ZUnknown	1			8.5	8.6	26.8	10.6	15	26	0.8	0.57	1.03	0.57	-0.3219	0	0	-0.1044	0.389	0	0	0	0	#N/A	-0.2818	0	1.88	0.9561
Tb927.4.2620	hypothetical protein, conserved	ZUnknown	1			17.5	15.6	26.9	24	19	17.3	0.73	0.82	1.55	0.73	0.0473	0	0	-0.2571	0.0159	1	0	0	0	#N/A	-0.2325	0	1.88	0.9782
Tb927.3.1100	exonuclease, putative	ZUnknown	1.02			42.2	27.1	58.8	34.1	29.1	38.9	1.24	0.93	1.51	0.93	0.2947	0	0	0.0737	0.518	0	0	0	0	#N/A	-0.0419	0	1.88	1.0426
Tb927.8.1450	hypothetical protein, conserved	ZUnknown	1.06			35.7	21.3	64.8	33.7	37.3	44.2	1.06	0.57	1.47	0.57	0.0473	0	0	0.1207	0.181	0	0	0	0	#N/A	-0.1127	0	1.88	1.1309
Tb927.11.3390	hypothetical protein, conserved, HECT E3 ligase at C-terminus	Ubiquitin.proteasome	1	13719	187	71.2	28.6	859.6	194.5	244.7	572.6	0.37	0.12	1.5	0.12	-0.5922	0	0	-0.0967	0.0186	1	0	0	0	1.16	0.0192	0	1.87	0.9928
Tb927.7.6970	paraflagellar rod protein, putative	Cytoskeleton	1.96	4966	2442	88.7	64.6	92.7	91.7	95.3	122.4	0.97	0.68	0.76	0.68	-0.3159	0	0	0.0596	0.376	0	0	0	0	1.36	0.2311	0	1.87	0.9709
Tb927.4.2400	hypothetical protein, conserved	Cytoskeleton	1	4781	370	55.6	53.3	171.5	66.4	82.6	143.2	0.84	0.65	1.2	0.65	-0.1574	0	0	-0.2095	1.85e-05	1	0	0	0	1.01	-0.2576	0	1.87	1.0841
Tb927.7.6190	Ring finger domain containing protein, putative	ZUnknown	1	4613	3085	90.8	133.9	110.6	65.8	46.4	38.2	1.38	2.89	2.9	1.38	1.257	0	0	0.1727	0.0256	1	0	0	0	1.27	0.3376	0	1.87	1.1506
Tb927.9.5590	DNA topoisomerase ii (TOP2)	Mito.DNA	1	4111	117	91.9	48	243.8	94	92.6	198.5	0.98	0.52	1.23	0.52	-0.1361	0	0	-0.1817	8.65e-05	1	0	0	0	0.99	-0.0663	0	1.87	1.0426
Tb927.4.5330	hypothetical protein	ZUnknown	1.36	4072	1375	79	73.5	171.6	69	85	136.2	1.14	0.86	1.26	0.86	0.1199	0	0	0.0184	0.804	0	0	0	0	1	-0.1838	0	1.87	0.9928
Tb927.11.16690	VCL3 Voltage-gated Chloride channel Like	Vesicular.transport	1	2997	239	94.5	55.6	165.8	118.5	159.1	214.8	0.8	0.35	0.77	0.35	-0.6439	0	0	0.2166	0.000153	1	0	0	0	1.26	-0.262	0	1.87	1.144
Tb927.11.4500	hypothetical protein, conserved	ZUnknown	1	2989	107	43.8	30.8	155.8	79.8	80.8	107.2	0.55	0.38	1.45	0.38	-0.334	0	0	0.1943	0.0026	1	0	0	0	0.99	-0.3104	0	1.87	1.189
Tb927.9.9580	tubulin tyrosine ligase protein, putative	Cytoskeleton	1	2703	665	121.2	198.5	331.1	88.5	74	119.7	1.37	2.68	2.77	1.37	1.1848	0	0	0.0176	0.811	0	0	0	0	1.03	-0.3271	0	1.87	1.0286
Tb927.8.2710	SET domain containing protein, putative	ZUnknown	1	2359	161	43.9	22.4	67.5	63.1	45.5	63.1	0.7	0.49	1.07	0.49	-0.4086	0	0	-0.2749	9.47e-05	1	0	0	0	1.03	-0.0739	0	1.87	0.9336
Tb927.10.6500	amino acid transporter, putative,amino acid permease, putative	Amino.acid.transport	1.03	2005	576	118.8	104.4	104.3	65.4	53.2	63.6	1.82	1.96	1.64	1.64	0.8533	0	0	-0.0618	0.47	0	0	0	0	0.99	-0.1767	0	1.87	1.0566
Tb927.11.1040	TFL1 TFIIF component	RNA.synthesis	1	1990	328	44.8	31.5	140.7	66.6	66.4	91.6	0.67	0.47	1.54	0.47	-0.1627	0	0	-0.0051	0.95	0	0	0	0	1.09	-0.1722	0	1.87	1.2928
Tb927.8.2730	hypothetical protein, conserved	ZUnknown	1	1980	795	46.2	38.7	71.4	61.5	62.7	58.5	0.75	0.62	1.22	0.62	-0.212	0	0	0.2537	0.000763	1	0	0	0	1.01	-0.1926	0	1.87	1.0704
Tb927.1.1150	zeta tubulin	Cytoskeleton	1.58	1852	266	43	56.5	110.4	47.3	44	36	0.91	1.28	3.07	0.91	0.8101	0	0	0.2016	0.0319	1	0	0	0	0.92	-0.1604	0	1.87	1.1635
Tb927.11.10450	UDP-N-acetylglucosamine-dolichyl-phosphate N-acetylglucosaminephosphotransferase, putative	Glycans	1	1844	555	69	27.1	61.9	73.2	60	89.5	0.94	0.45	0.69	0.45	-0.5284	0	0	0.394	6.74e-10	1	0	0	0	1.05	-0.2907	0	1.87	1.0356
Tb927.7.5740	conserved protein	ZUnknown	1	1783	158	66.3	56	97.6	74.4	76	75.9	0.89	0.74	1.29	0.74	-0.039	0	0	-0.7346	6.24e-33	1	0	0	1	1.03	-0.2994	0	1.87	1.0426
Tb927.7.6210	hypothetical protein, conserved	ZUnknown	1	1774	634	40.8	57	55.8	21.2	31.4	30.7	1.92	1.82	1.82	1.82	0.8901	0	0	-0.6445	1.58e-09	1	0	0	1	1.16	-0.0706	0	1.87	1.1043
Tb927.9.10630	hypothetical protein, conserved	ZUnknown	1	1653	307	78.1	55.8	187.9	73.6	24.6	32.8	1.06	2.27	5.73	1.06	1.5945	0	0	-0.2202	0.0166	1	0	0	0	1.22	0.192	0	1.87	1.0772
Tb927.6.2470	hypothetical protein, conserved	ZUnknown	1	1651	131	31.6	29.2	81.6	40.8	51.4	54.4	0.77	0.57	1.5	0.57	-0.0791	0	0	0.1693	0.0474	1	0	0	0	1.07	-0.2292	0	1.87	1.3103
Tb927.5.3080	hypothetical protein, conserved	ZUnknown	1	1316	253	40.6	53.2	73.4	51.1	81.6	69	0.79	0.65	1.06	0.65	-0.263	0	0	0.1202	0.188	0	0	0	0	1.19	-0.2477	0	1.87	1.0286
Tb927.5.960	MSP1, Mitochondrial protein involved in sorting of proteins in the mitochondria, putative	Mito.biogenesis	1	1061	12	106.4	51.6	61.7	158.8	155.6	113.8	0.67	0.33	0.54	0.33	-0.962	0	0	-0.0824	0.272	0	0	0	0	0.94	0.0743	0	1.87	0.9635
Tb927.4.2810	hypothetical protein	ZUnknown	1			84.5	85.8	107.2	70.8	42	73.9	1.19	2.04	1.45	1.19	0.6415	0	0	-1.1873	2.84e-46	1	0	0	1	#N/A	1.6178	0	1.87	1.1953
Tb927.10.6700	KKIP3	Cell.cycle	1.58			30.6	18.3	81.7	15.9	42	68.7	1.92	0.44	1.19	0.44	0.2429	0	0	0.0618	0.499	0	0	0	0	#N/A	-0.0332	0	1.87	1.0704
Tb927.10.1680	histone deacetylase 1 (DAC1 or HDAC1)	Chromatin	1.16			20	14.8	37.4	30	28.3	33.3	0.67	0.52	1.12	0.52	-0.3771	0	0	0.2247	0.0277	1	0	0	0	#N/A	-0.1036	0	1.87	1.0072
Tb927.11.7360	palmitoyl acyltransferase 9, putative	Lipids	1			216	288.7	109.7	109.1	88.7	55.7	1.98	3.25	1.97	1.97	1.263	0	0	0.074	0.411	0	0	0	0	#N/A	-0.2068	0	1.87	1.0426
Tb927.4.2950	mitochondrial DNA polymerase I protein A, putative	Mito.DNA	1.96			76.8	34.3	131.5	119.9	76.7	136.9	0.64	0.45	0.96	0.45	-0.5493	0	0	-0.4559	1.65e-15	1	0	0	0	#N/A	-0.8341	1	1.87	1.189
Tb927.8.6540	TFIIH basal transcription factor subunit (p44)	RNA.synthesis	1			33.5	16.4	58.7	31.7	23.1	48.9	1.06	0.71	1.2	0.71	-0.0145	0	0	-0.4043	2.49e-06	1	0	0	0	#N/A	-0.286	0	1.87	1.0841
Tb927.10.8860	hypothetical protein, conserved	ZUnknown	1			241.1	337.5	257.2	160	141.2	171.8	1.51	2.39	1.5	1.5	0.848	0	0	0.3258	5.48e-09	1	0	0	0	#N/A	0.2231	0	1.87	0.9561
Tb927.11.14860	hypothetical protein, conserved	ZUnknown	1			58.3	55.8	64.7	25.3	25.7	35.8	2.3	2.17	1.81	1.81	1.0658	0	0	0.0493	0.578	0	0	0	0	#N/A	-0.2025	0	1.87	0.9782
Tb927.10.3470	Ankyrin repeats (3 copies), putative	ZUnknown	1			98.1	47.9	133.9	171.8	133.6	123.3	0.57	0.36	1.09	0.36	-0.5706	0	0	-0.0858	0.209	0	0	0	0	#N/A	-0.1792	0	1.87	1.0635
Tb927.10.1370	hypothetical protein, conserved	ZUnknown	1			21	25.6	61.9	34.6	50.9	39.4	0.61	0.5	1.57	0.5	-0.1627	0	0	0.2642	0.00149	1	0	0	0	#N/A	-0.3772	0	1.87	1.1953
Tb927.11.7920	hypothetical protein, conserved	ZUnknown	1		146	74	45.1	67.3	66.8	55.9	49.6	1.11	0.81	1.36	0.81	0.1287	0	0	0.1582	0.0467	1	0	0	0	1.09	-0.2233	0	1.87	1.2869
Tb927.8.1050	hypothetical protein, conserved, WD40 repeat	ZUnknown	1.14	9859	1814	102.1	34.3	797.8	174.9	145	472.5	0.58	0.24	1.69	0.24	-0.2573	0	0	-0.1592	8.25e-05	1	0	0	0	1.16	-0.189	0	1.86	0.9782
Tb927.9.12090	Putative death-receptor fusion protein (DUF2428), putative	ZUnknown	1	6592	268	82.6	35.7	304.1	178.8	114.6	206.2	0.46	0.31	1.47	0.31	-0.4215	0	0	-0.0681	0.176	0	0	0	0	1.09	-0.2928	0	1.86	1.0072
Tb927.3.2050	hypothetical protein, conserved, no domains, poly(Q) tracts, K-specific	Mito.DNA	1	5160	262	74	35.5	282.3	100	119.5	298.6	0.74	0.3	0.95	0.3	-0.5922	0	0	-0.0072	0.901	0	0	0	0	1.05	-0.2689	0	1.86	0.9855
Tb927.10.9040	hypothetical protein, conserved	ZUnknown	1.47	4913	203	68.8	52.6	235.1	124.2	97.1	153.9	0.55	0.54	1.53	0.54	-0.1954	0	0	0.5755	2.3e-33	1	0	0	0	0.94	-0.2137	0	1.86	1.144
Tb927.8.2430	hypothetical protein, conserved, resemblance to myosin	ZUnknown	1	3992	419	35.2	27	85.7	34.7	68.9	119.4	1.01	0.39	0.72	0.39	-0.5009	0	0	0.1236	0.0355	1	0	0	0	1.09	-0.3603	0	1.86	1.1309
Tb927.11.16790	DYRK2 mitogen-activated protein kinase	Protein.kinase	1	3129	109	61.5	56.7	419.6	59	51.2	88.8	1.04	1.11	4.73	1.04	1.1974	0	0	0.4016	4.98e-17	1	0	0	0	1.08	-0.5848	1	1.86	0.9928
Tb927.11.15250	hypothetical protein, conserved	ZUnknown	1	2158	160	58	32.2	117.9	51.3	76.2	100.5	1.13	0.42	1.17	0.42	-0.1414	0	0	-0.0511	0.47	0	0	0	0	1.13	-0.3953	0	1.86	1.0215
Tb927.8.6590	Outer mitochondrial membrane transport complex protein/Glutathione S-transferase, C-terminal domain containing protein, putative	ZUnknown	1	2158	1204	286.2	287.3	241.3	196	84.2	59.1	1.46	3.41	4.08	1.46	1.5769	0	0	-0.4872	3.99e-11	1	0	0	0	1.14	0.9628	0	1.86	1.0909
Tb927.8.1940	endosomal integral membrane protein, putative	Vesicular.transport	1	2084	182	344.9	223.9	141.4	348.7	242.4	194.8	0.99	0.92	0.73	0.73	-0.1844	0	0	0.1327	0.0219	1	0	0	0	1.04	0.0973	0	1.86	0.9928
Tb927.7.4730	PUF5	RNA.binding	1.96	1917	592	75.9	82.8	167	44.9	40.2	50.3	1.69	2.06	3.32	1.69	1.2367	0	0	1.0483	1.49e-43	1	0	1	0	1.15	0.8955	0	1.86	1.0215
Tb927.5.620	invariant surface glycoprotein, putative	ZUnknown	1.16	1665	322	46.3	45.1	31.1	29.8	31.5	36.7	1.55	1.43	0.85	0.85	0.3524	0	0	-0.4493	1.67e-07	1	0	0	0	1	0.2227	0	1.86	1.157
Tb927.1.3150	hypothetical protein, conserved	ZUnknown	1	1535	501	92.4	65.7	54.7	113.5	95.2	67	0.81	0.69	0.82	0.69	-0.3708	0	0	0.2946	1.64e-05	1	0	0	0	1.05	-0.0757	0	1.86	1.1043
Tb927.10.2660	hypothetical protein, conserved	ZUnknown	1	1380	701	113.6	164.6	76.6	56.9	39.7	30.2	2	4.15	2.54	2	1.5344	0	0	0.199	0.0288	1	0	0	0	1.12	0.0434	0	1.86	1.0704
Tb927.6.1450	hypothetical protein, conserved	ZUnknown	1	1205	355	112.8	168.4	88.8	65.9	52.8	45.8	1.71	3.19	1.94	1.71	1.189	0	0	0.0901	0.373	0	0	0	0	1.07	0.1285	0	1.86	1.0072
Tb927.10.8370	hypothetical protein, conserved	ZUnknown	1	608	68	105.1	241.7	77.8	70.7	71.2	38.3	1.49	3.39	2.03	1.49	1.2037	0	0	-0.2985	0.0106	1	0	0	0	1.2	0.0987	0	1.86	1.0772
Tb927.9.2320	POMP1 (possible S-Adenosyl methionine methyl transferase (yeast Cgt1 is involved in lipid homeostasis)	Mito.membrane	1.44			39.8	40.4	107.3	33.2	29.9	36.6	1.2	1.35	2.93	1.2	0.8692	0	0	-0.2409	0.0131	1	0	0	0	#N/A	-0.2832	0	1.86	1.4542
Tb927.11.7250	hypothetical protein, conserved	Mito.pathway	2.01			44	31	72.5	41.4	32.2	31.1	1.06	0.96	2.33	0.96	0.5361	0	0	0.4433	1.2e-07	1	0	0	0	#N/A	-0.1252	0	1.86	1.3448
Tb927.10.3690	rRNA dimethyltransferase, putative	rRNA.tRNA.process	2.25			74.5	57.6	113.5	64.7	40.3	32.8	1.15	1.43	3.46	1.15	1.0096	0	0	0.0159	0.89	0	0	0	0	#N/A	0.0889	0	1.86	1.0356
Tb927.3.4190	endosomal integral membrane protein, putative	Vesicular.transport	1			376.9	298.2	371.9	269.5	198.5	270.6	1.4	1.5	1.37	1.37	0.5093	0	0	-0.285	1.15e-08	1	0	0	0	#N/A	-0.225	0	1.86	0.9855
Tb927.10.7400	Zinc finger domain found in E3 ubiquitin ligases	Zinc.finger	1			43.5	21.6	62.5	67	55.6	77.8	0.65	0.39	0.8	0.39	-0.7053	0	0	0.0483	0.603	0	0	0	0	#N/A	-0.3022	0	1.86	1.2327
Tb927.10.7960	hypothetical protein, conserved	ZUnknown	1			36.9	46.7	52.4	14.7	30.7	37.8	2.51	1.52	1.39	1.39	0.8533	0	0	0.1135	0.272	0	0	0	0	#N/A	-0.1333	0	1.86	0.9561
Tb927.11.16780	hypothetical protein	ZUnknown	1		1976	111.3	100	209.5	134	45.5	42.8	0.83	2.2	4.89	0.83	1.4005	0	0	0.3216	0.0525	0	0	0	0	2.03	1.4961	0	1.86	0.9709
Tb927.1.670	conserved protein, unknown function	ZUnknown	1			39.8	20.1	147.3	36.3	28.6	82.3	1.1	0.7	1.79	0.7	0.259	0	0	0.082	0.243	0	0	0	0	#N/A	-0.1462	0	1.86	0.9855
Tb927.10.4820	hypothetical protein, conserved	ZUnknown	2.07			58.5	51.7	121.1	44.5	62.4	92.8	1.31	0.83	1.3	0.83	0.1974	0	0	0.2798	4.82e-05	1	0	0	0	#N/A	-0.0345	0	1.86	1.0072
Tb927.3.3230	NOL1/NOP2/sun family, putative	ZUnknown	1			47.6	25.7	83	45.7	51.2	64.2	1.04	0.5	1.29	0.5	-0.0842	0	0	-0.1369	0.139	0	0	0	0	#N/A	-0.3177	0	1.86	1.0496
Tb927.11.12260	hypothetical protein, conserved	ZUnknown	1			42.4	33.6	110.2	56.9	61.5	77.6	0.75	0.55	1.42	0.55	-0.1414	0	0	-0.0293	0.727	0	0	0	0	#N/A	-0.2438	0	1.86	1.0976
Tb927.3.3980	hypothetical protein, conserved	ZUnknown	1			95.4	146.8	223.1	49.3	59.5	59.2	1.94	2.47	3.77	1.94	1.4471	0	0	-0.1587	0.0359	1	0	0	0	#N/A	-0.1127	0	1.86	1.1953
Tb927.3.3940	DRBD11	RNA.binding	1.03	11151	8067	93	83.5	164.5	109.2	83.3	125	0.85	1	1.32	0.85	0.0795	0	0	-0.4295	9.87e-18	1	0	0	0	1.57	0.2762	0	1.85	1.189
Tb927.3.5250	ZC3H8	RNA.binding	1	4311	2332	118.3	77.6	441.3	90	45.5	81.1	1.31	1.71	5.44	1.31	1.4957	0	0	-0.1499	0.0179	1	0	0	0	1.32	0.5158	0	1.85	0.9709
Tb927.8.6340	CYC10, CYC2-like cyclin	Cell.cycle	1	4273	2948	92.6	90.2	349.8	62.6	41.8	33.3	1.48	2.16	10.5	1.48	2.2367	0	0	0.5105	3.13e-11	1	0	0	0	1.49	0.9187	0	1.85	1.1309
Tb927.5.3860	tubulin tyrosine ligase, putative	Cytoskeleton	1	3579	1673	66.8	31.4	98.3	91.2	49.9	90.6	0.73	0.63	1.08	0.63	-0.2981	0	0	0.0254	0.74	0	0	0	0	1.08	-0.9083	1	1.85	1.0286
Tb927.9.3860	Dyggve-Melchior-Clausen syndrome protein, putative	ZUnknown	1	2616	402	57.6	27.7	118.3	69.6	65.8	93.9	0.83	0.42	1.26	0.42	-0.2573	0	0	0.1413	0.0337	1	0	0	0	1.03	-0.3191	0	1.85	1.189
Tb927.9.10960	ATP-dependent DEAD/H RNA helicase, putative, no clear yeast homologue	RNA.helicase	1	2435	312	71.7	41.1	83.6	90.7	54.1	65	0.79	0.76	1.29	0.76	-0.0791	0	0	-0.2885	3.39e-06	1	0	0	0	1.11	-0.0846	0	1.85	1.0072
Tb927.5.3660	hypothetical protein, conserved	ZUnknown	1	2425	881	102.6	124.1	167.5	79.4	62.1	72.8	1.29	2	2.3	1.29	0.8979	0	0	-0.4921	6.69e-14	1	0	0	0	1.12	-0.4744	0	1.85	1.0496
Tb927.10.15190	BBP72	Cytoskeleton	1	2377	213	35.8	23	66	35.2	50.5	63.3	1.02	0.46	1.04	0.46	-0.2515	0	0	-0.0463	0.578	0	0	0	0	1	-0.3734	0	1.85	1.0426
Tb927.7.740	chaperone DNAj, putative, J28	Chaperone	1	2103	448	34.1	22.8	47.6	36.7	49.5	43.6	0.93	0.46	1.09	0.46	-0.2746	0	0	0.1529	0.0669	0	0	0	0	1.11	-0.2417	0	1.85	1.0496
Tb927.10.16040	oxidoreductase-protein, putative	Enzyme	1.12	1917	34	47.8	18.7	91.3	56.4	45.5	64.8	0.85	0.41	1.41	0.41	-0.1681	0	0	-0.0607	0.46	0	0	0	0	1.14	-0.1548	0	1.85	1.0566
Tb927.7.2750	protein kinase, putative	Protein.kinase	1	1569	581	126.3	122.5	82.1	83.4	89.4	75	1.51	1.37	1.09	1.09	0.4042	0	0	0.1711	0.0427	1	0	0	0	0.96	-0.3659	0	1.85	1.0356
Tb927.5.2540	Organic solute transport protein 1, putative	ZUnknown	1.86	1539	113	66.2	34.2	36.3	53.9	36	43	1.23	0.95	0.84	0.84	0.0096	0	0	-0.0828	0.471	0	0	0	0	0.81	-0.0364	0	1.85	0.9486
Tb927.10.13480	protein kinase, putative	Protein.kinase	1.1	1478	566	202.8	218	139	112.3	98.2	81	1.81	2.22	1.72	1.72	0.9386	0	0	0.2896	4.74e-06	1	0	0	0	1.04	-0.1811	0	1.85	0.9411
Tb927.8.7070	FAZ15 flagellar attachment zone protein	Cytoskeleton	1	1289	160	54.1	45.6	49.4	33.2	44.8	61.9	1.63	1.02	0.8	0.8	0.2016	0	0	-0.0929	0.35	0	0	0	0	1.28	-0.0816	0	1.85	0.9486
Tb927.8.6120	hypothetical protein, conserved	ZUnknown	1	1201	160	58.5	54.9	115	48	77.3	65.1	1.22	0.71	1.77	0.71	0.3026	0	0	-0.2389	0.0033	1	0	0	0	1.14	-0.0756	0	1.85	1
Tb927.8.3040	hypothetical protein, conserved	ZUnknown	1	747	85	15.4	14.3	31.6	22.8	20.2	17	0.68	0.71	1.86	0.68	0.1155	0	0	0.2314	0.0728	0	0	0	0	1.21	-0.3553	0	1.85	1.1043
Tb927.4.3420	WEE1 protein kinase	Cell.cycle	1			39.9	40.2	83.2	40.6	62.4	74.3	0.98	0.64	1.12	0.64	-0.1308	0	0	0.0377	0.616	0	0	0	0	#N/A	-0.0432	0	1.85	1
Tb927.11.11720	FG-GAP repeat protein, putative,intergrin alpha chain protein, putative	Cytoskeleton	1			229.9	105.3	146.2	292.4	214.3	180.1	0.79	0.49	0.81	0.49	-0.5215	0	0	0.4601	2.88e-17	1	0	0	0	#N/A	0.0412	0	1.85	1.1635
Tb927.9.5350	actin related protein 3, putative	Cytoskeleton	1			31.3	16.9	54.5	23	24.2	41.2	1.36	0.7	1.32	0.7	0.1721	0	0	0.3495	1.34e-06	1	0	0	0	#N/A	-0.1249	0	1.85	1.269
Tb927.10.13210	dolichyl-P-Man:GDP-ManGlcNAc2-PP-dolichyl beta-1,4-mannosyltransferase, putative	Glycans	1.76			68.5	24.1	83.5	106.9	67.7	128.1	0.64	0.36	0.65	0.36	-0.8625	0	0	0.046	0.515	0	0	0	0	#N/A	0.0428	0	1.85	1.0496
Tb927.8.5420	methyltransferase domain containing protein, putative	Mito.pathway	1			31.6	17.5	48.4	32.6	42.7	48.8	0.97	0.41	0.99	0.41	-0.3401	0	0	-0.1092	0.227	0	0	0	0	#N/A	-0.0265	0	1.85	0.9336
Tb927.8.1810	rhomboid-like protein	Protease	1			46.5	45.1	62.6	46.9	50.8	55.8	0.99	0.89	1.12	0.89	0	0	0	0.0305	0.767	0	0	0	0	#N/A	-0.1803	0	1.85	1.0356
Tb927.9.2900	UTP10 (NOP287)	rRNA.tRNA.process	1			84	31.7	572.8	220.1	211.2	335.6	0.38	0.15	1.71	0.15	-0.4215	0	0	-0.2579	1.55e-10	1	0	0	0	#N/A	-0.2591	0	1.85	1.0496
Tb927.10.8400	Vip36 lectin-like, ERGIC53 paralogue, ER quality control	Vesicular.transport	1			81.4	86.3	98.6	61.8	73.4	85.6	1.32	1.18	1.15	1.15	0.2829	0	0	0.0673	0.334	0	0	0	0	#N/A	-0.1049	0	1.85	0.926
Tb927.10.9370	hypothetical protein, conserved	ZUnknown	1			71.9	43.7	59.3	83.4	65.5	62.9	0.86	0.67	0.94	0.67	-0.2805	0	0	0.0344	0.716	0	0	0	0	#N/A	-0.1828	0	1.85	1.0072
Tb927.3.1850	Protein kinase domain containing protein, putative	ZUnknown	1			192.7	171.1	437.2	120.5	79.4	90.9	1.6	2.15	4.81	1.6	1.5126	0	0	-0.0885	0.197	0	0	0	0	#N/A	0.0068	0	1.85	1.0144
Tb927.8.5370	hypothetical protein, conserved, no yeast or human match	ZUnknown	1			26.6	17.2	95.1	25.1	27.2	42.6	1.06	0.63	2.23	0.63	0.3859	0	0	-0.5576	2.45e-11	1	0	0	0	#N/A	-0.264	0	1.85	1.0215
Tb927.10.2050	hypothetical protein, conserved	ZUnknown	1			46	49.8	60.1	45.8	51	41.3	1	0.98	1.46	0.98	0.1974	0	0	0.2722	0.00175	1	0	0	0	#N/A	-0.0807	0	1.85	1.0496
Tb927.10.12880	SET domain containing protein, putative	ZUnknown	1			73.3	61.3	100.1	77.9	76.6	59.8	0.94	0.8	1.67	0.8	0.1848	0	0	0.2638	0.000642	1	0	0	0	#N/A	-0.2363	0	1.85	1.111
Tb927.8.5050	OTU-like cysteine protease, putative	ZUnknown	1	4517	1410	60.8	57	251.2	65.6	69.7	122.7	0.93	0.82	2.05	0.82	0.341	0	0	-0.6615	1.78e-28	1	0	0	1	1.23	0.3509	0	1.84	1.0144
Tb927.8.5410	hypothetical protein, conserved	ZUnknown	1	3747	1776	46.3	28.8	115.6	54.6	48.3	76	0.85	0.6	1.52	0.6	-0.0145	0	0	-0.0117	0.907	0	0	0	0	1	-0.1512	0	1.84	0.9782
Tb927.2.4140	hypothetical protein, conserved	ZUnknown	1	3506	1155	90.2	44.6	158.4	119.6	92.1	112.3	0.75	0.48	1.41	0.48	-0.1844	0	0	-0.2819	4.37e-07	1	0	0	0	1.1	-0.4131	0	1.84	1.0144
Tb927.7.7210	POMP37	Mito.membrane	1	3234	229	59.6	100.4	107.2	73.7	60.5	74.8	0.81	1.66	1.43	0.81	0.3785	0	0	0.3538	6.05e-07	1	0	0	0	0.96	-0.1719	0	1.84	1.2079
Tb927.10.3750	Endonuclease/Exonuclease/phosphatase family, putative	ZUnknown	1	2992	1431	82	61.6	200.1	54.9	39.3	67.8	1.49	1.57	2.95	1.49	1.0024	0	0	0.3044	1.54e-06	1	0	0	0	1.2	-0.7017	1	1.84	1.1309
Tb927.11.10180	hypothetical protein, conserved	ZUnknown	1	2063	256	55.4	63.7	193.8	46.7	45	97.7	1.19	1.42	1.98	1.19	0.6135	0	0	0.0271	0.73	0	0	0	0	1.06	-0.0894	0	1.84	1.1177
Tb927.3.4690	DTW domain containing protein, putative	ZUnknown	1	1855	516	34.5	58.7	82	33.5	39.6	53.7	1.03	1.48	1.53	1.03	0.4294	0	0	-0.2127	0.0072	1	0	0	0	0.98	-0.3414	0	1.84	1.1699
Tb927.9.9180	hypothetical protein, conserved	ZUnknown	1.8	1821	778	80.4	47.9	47.8	43.4	43.4	47	1.85	1.1	1.02	1.02	0.4042	0	0	-0.6471	8.47e-15	1	0	0	1	0.99	0.3308	0	1.84	0.9709
Tb927.10.13560	Mevalonate-diphosphate decarboxylase	Prenylation	1.89	1452	254	75.9	56.5	124.2	54	60.3	85.1	1.41	0.94	1.46	0.94	0.3448	0	0	0.6847	5.89e-28	1	0	1	0	1.16	-0.1081	0	1.84	0.9928
Tb927.11.13640	J-binding protein (JBP1)	Chromatin	1			65.6	72.7	294.9	76.5	105.7	179.7	0.86	0.69	1.64	0.69	0.0886	0	0	-0.5907	1.18e-32	1	0	0	1	#N/A	0.3335	0	1.84	0.9411
Tb927.2.3880	HNRNPH/F	RNA.processing	1			90.4	97.1	211.5	100.9	71.7	92.9	0.9	1.35	2.28	0.9	0.5945	0	0	-0.4027	2.41e-10	1	0	0	0	#N/A	0.1734	0	1.84	0.9561
Tb927.4.5160	hypothetical protein, conserved	ZUnknown	1.19			38.4	19	39.9	54.6	38.7	55	0.7	0.49	0.73	0.49	-0.6439	0	0	-0.0713	0.427	0	0	0	0	#N/A	-0.2345	0	1.84	1.0215
Tb927.7.4660	hypothetical protein, conserved	ZUnknown	1.82			60.2	47.9	48.7	48.9	48.8	50.5	1.23	0.98	0.96	0.96	0.0795	0	0	0.1635	0.0614	0	0	0	0	#N/A	0.0362	0	1.84	1.0286
Tb927.10.15460	EAP30/Vps36 family, putative	ZUnknown	1.82			90.3	84.8	131.7	61.4	86.2	94.9	1.47	0.98	1.39	0.98	0.3561	0	0	-0.1256	0.073	0	0	0	0	#N/A	-0.3343	0	1.84	1.0286
Tb927.3.4370	Vesicle coat protein involved in Golgi to plasma membrane transport, putative	ZUnknown	1.85			75.8	89.8	128.3	65.5	52.2	52.3	1.16	1.72	2.45	1.16	0.8292	0	0	0.1015	0.236	0	0	0	0	#N/A	-0.2272	0	1.84	1.0426
Tb927.11.16240	RING-variant domain containing protein, putative	ZUnknown	1			77.7	50.5	182.6	101.7	137.2	184.4	0.76	0.37	0.99	0.37	-0.5009	0	0	0.3769	3.34e-12	1	0	0	0	#N/A	-0.2072	0	1.84	1.0496
Tb927.4.4710	hypothetical protein, conserved	ZUnknown	1	3157	50	32.2	21.6	70.6	64.7	36.3	55.3	0.5	0.6	1.28	0.5	-0.334	0	0	-0.2198	0.00166	1	0	0	0	1.61	-0.2141	0	1.83	0.9635
Tb927.3.1350	hypothetical protein, conserved	ZUnknown	1.57	3023	580	51.4	18.1	121.1	123.5	48.1	98.9	0.42	0.38	1.22	0.38	-0.5706	0	0	-0.3467	1.57e-10	1	0	0	0	1	-0.1927	0	1.83	1.0144
Tb927.6.1510	lysyl-tRNA synthetase, putative	Translation.tRNA	1	2831	627	104.6	74.8	145.2	62.6	46.4	60.8	1.67	1.61	2.39	1.61	0.9184	0	0	0.0405	0.63	0	0	0	0	1.95	1.0053	0	1.83	1.0496
Tb927.11.5800	hypothetical protein, conserved	ZUnknown	1	2714	138	56.7	34.8	108.8	81.9	70.4	87.4	0.69	0.49	1.24	0.49	-0.31	0	0	0.0604	0.405	0	0	0	0	1.1	-0.1687	0	1.83	0.9561
Tb927.11.5080	hypothetical protein, conserved	ZUnknown	1	2503	1583	196.8	280.3	313.1	123.8	43.1	37.8	1.59	6.5	8.28	1.59	2.448	0	0	0.4459	2.86e-10	1	0	0	0	1.21	0.1683	0	1.83	1.0215
Tb927.11.5050	fumarate hydratase, class I (FHm)	Mito.citric.acid.cycle	1	2096	264	96.8	64.1	91.5	84.5	83	88.8	1.15	0.77	1.03	0.77	-0.0242	0	0	-0.1068	0.162	0	0	0	0	1.01	-0.19	0	1.83	1.1635
Tb927.11.8920	CEP120B	Cytoskeleton	1	2091	230	35.1	25.5	87.8	41.3	39.5	55.7	0.85	0.65	1.58	0.65	0.038	0	0	0.2593	0.00052	1	0	0	0	1.06	-0.21	0	1.83	1.111
Tb927.11.2910	phosphoglycerate mutase, putative (iPGAM)	Glucose.glycerol	1	2003	760	110.7	119.9	186.3	61.8	47.9	62.8	1.79	2.5	2.97	1.79	1.275	0	0	0.1089	0.177	0	0	0	0	1.05	-0.3605	0	1.83	1.2141
Tb927.11.960	ATPase, putative,cell division control protein 48 homolog, putative	Enzyme	1	1986	9	79.2	70.7	118.7	98	109.5	77.4	0.81	0.65	1.53	0.65	-0.0048	0	0	0.0914	0.27	0	0	0	0	1.25	-0.2422	0	1.83	1.0704
Tb927.7.4300	F-box domain containing protein, putative	ZUnknown	1	1960	335	53.9	58.6	87.2	41	36.2	56.4	1.31	1.62	1.55	1.31	0.5785	0	0	0.1791	0.0319	1	0	0	0	1.07	-0.0607	0	1.83	0.926
Tb927.8.1900	hypothetical protein, conserved	ZUnknown	1	1910	702	27.5	26.8	53.2	31.5	34.7	34.9	0.87	0.77	1.52	0.77	0.075	0	0	0.1314	0.146	0	0	0	0	1.05	-0.2641	0	1.83	1.281
Tb927.3.5000	hypothetical protein, conserved	ZUnknown	1	1861	120	55.7	54	101.8	86	99.4	69.2	0.65	0.54	1.47	0.54	-0.1735	0	0	0.0751	0.423	0	0	0	0	1.18	-0.1285	0	1.83	1.0635
Tb927.4.2440	hypothetical protein, very weak match to yeast ribosomal protein RSM23	Mito.pathway	1	1779	533	89.4	82.5	76.9	58.3	49	47.3	1.53	1.68	1.63	1.53	0.69	0	0	0.0835	0.381	0	0	0	0	0.96	-0.28	0	1.83	0.9561
Tb927.7.4810	HD domain containing protein, putative	ZUnknown	2.02	1600	141	207.6	260.9	133.8	110.4	76.5	72.9	1.88	3.41	1.84	1.84	1.2489	0	0	0.1214	0.16	0	0	0	0	0.96	-0.0405	0	1.83	0.9411
Tb927.8.630	lipoate-protein ligase, lipoyltransferase, lipoate biosynthesis protein, putative	Mito.pathway	1	1599	28	46.2	30.4	47.5	48.8	33.4	30	0.95	0.91	1.58	0.91	0.1974	0	0	-0.2145	0.0472	1	0	0	0	#N/A	-0.0993	0	1.83	1.0144
Tb927.10.11220	procyclic form surface glycoprotein (PSSA-2)	Membrane.protein	1	1532	226	120.9	142.4	142.6	103.5	64.1	62.4	1.17	2.22	2.29	1.17	0.9209	0	0	0.591	1.15e-13	1	0	1	0	1.06	0.1653	0	1.83	1.0841
Tb927.11.7030	Rad51, putative	ZUnknown	1	1507	212	102.9	74.1	73	143	106	65	0.72	0.7	1.12	0.7	-0.2401	0	0	0.2472	0.000128	1	0	0	0	0.92	-0.2425	0	1.83	1.0072
Tb927.10.13750	hypothetical protein, conserved	ZUnknown	1.48	925	13	36.7	39.7	75.4	49.6	61.7	51.9	0.74	0.64	1.45	0.64	-0.0842	0	0	0.0857	0.38	0	0	0	0	1.09	-0.2187	0	1.83	1.0286
Tb927.9.13530	hypothetical protein, conserved	ZUnknown	1	649	130	33.7	38.4	43.5	21.3	33.9	22.9	1.58	1.13	1.9	1.13	0.6198	0	0	0.0308	0.809	0	0	0	0	0.95	-0.1602	0	1.83	1.1375
Tb927.4.2910	hypothetical protein, conserved	ZUnknown	1			38.4	24.6	87.8	50.2	60.9	94.2	0.76	0.4	0.93	0.4	-0.5215	0	0	-0.6287	1.51e-24	1	0	0	1	#N/A	-0.1631	0	1.83	0.9486
Tb927.5.1320	KKIP2 Kinetochore interacting protein 2	Cell.cycle	1		194	81.1	43.1	166.3	87.5	78.6	133.4	0.93	0.55	1.25	0.55	-0.1361	0	0	-0.0682	0.268	0	0	0	0	1.09	-0.1883	0	1.83	0.9107
Tb927.10.13160	mannosyltransferase-II (MT-II)	GPI.anchors	1.43			53.7	28.8	90.2	74.6	54.9	77.4	0.72	0.52	1.17	0.52	-0.3159	0	0	0.2006	0.00882	1	0	0	0	#N/A	-0.1897	0	1.83	1.0841
Tb927.8.930	hypothetical protein, conserved, predicted GPI anchor	Membrane.protein	2.27			263.5	418.4	244.8	144.4	154.1	130.3	1.82	2.72	1.88	1.82	1.0976	0	0	0.6263	5.66e-35	1	0	1	0	#N/A	0.5266	0	1.83	0.9855
Tb927.4.2110	protein phosphatase 2C, putative	Protein.phosphatase	1			17.4	13.4	56.6	13.7	26.7	55.8	1.27	0.5	1.01	0.5	-0.1099	0	0	-0.0071	0.95	0	0	0	0	#N/A	-0.2062	0	1.83	1.0426
Tb927.8.6260	hypothetical protein, conserved	ZUnknown	1			38.1	31.6	65.6	50.4	67.4	104.9	0.76	0.47	0.63	0.47	-0.6897	0	0	0.0281	0.677	0	0	0	0	#N/A	-0.1061	0	1.83	0.9561
Tb927.10.2870	hypothetical protein, conserved	ZUnknown	1.45			65.4	75	178	45.4	64.8	89.8	1.44	1.16	1.98	1.16	0.6104	0	0	0.0681	0.307	0	0	0	0	#N/A	0.0037	0	1.83	1.0566
Tb927.2.2860	hypothetical protein, conserved	ZUnknown	1			95.9	136.2	151.1	63.8	43.8	51.9	1.5	3.11	2.91	1.5	1.3258	0	0	0.0015	0.988	0	0	0	0	#N/A	0.1404	0	1.83	1.0704
Tb927.7.1660	hypothetical protein, conserved	ZUnknown	1			53.9	25.1	112.6	79.9	63.8	84.1	0.67	0.39	1.34	0.39	-0.3219	0	0	0.063	0.329	0	0	0	0	#N/A	-0.2983	0	1.83	1.1309
Tb927.11.10500	hypothetical protein, conserved	ZUnknown	1			34.8	19.6	52.8	31.9	29.1	37.3	1.09	0.67	1.42	0.67	0.0841	0	0	0.199	0.0268	1	0	0	0	#N/A	-0.2916	0	1.83	1.2079
Tb927.6.3090	XMAP215, matches microtubule-associated proteins	Cytoskeleton	1	6077	543	175.1	160.3	280.2	153.3	138.5	301.6	1.14	1.16	0.93	0.93	0.1066	0	0	0.2461	1.01e-06	1	0	0	0	1.01	-0.1279	0	1.82	0.9184
Tb927.10.13450	hypothetical protein, conserved	ZUnknown	1	5526	2819	42.4	28.6	185.3	34.3	27.5	77.9	1.24	1.04	2.38	1.04	0.6354	0	0	-0.0244	0.74	0	0	0	0	1.1	1.3625	0	1.82	0.8953
Tb927.9.8620	Clathrin-associated protein	Vesicular.transport	1	3905	424	31.6	20.7	73.6	40.5	67	108.1	0.78	0.31	0.68	0.31	-0.7612	0	0	-0.0424	0.558	0	0	0	0	0.95	-0.1436	0	1.82	1
Tb927.10.14460	leucine-rich repeat protein (LRRP)	LRRP	1	3546	403	86.1	60.4	137.8	107.3	122.1	142.5	0.8	0.49	0.97	0.49	-0.4086	0	0	-0.0876	0.105	0	0	0	0	1	-0.2304	0	1.82	0.926
Tb927.11.6400	kinesin	Cytoskeleton	1	3192	82	72.6	45.8	220.6	61.9	117	209.7	1.17	0.39	1.05	0.39	-0.2009	0	0	-0.0472	0.428	0	0	0	0	1.09	-0.2181	0	1.82	0.9107
Tb927.3.5230	DNA repair protein, putative	DNA	1	2371	506	19.3	13	69.1	35.4	35	55.7	0.55	0.37	1.24	0.37	-0.4739	0	0	-0.0784	0.344	0	0	0	0	1.06	-0.1999	0	1.82	1.0635
Tb927.6.580	hypothetical protein, conserved	ZUnknown	1	2340	279	51.7	31.5	104.2	57	56.5	106.7	0.91	0.56	0.98	0.56	-0.2922	0	0	0.0301	0.673	0	0	0	0	1.04	-0.1253	0	1.82	0.8875
Tb927.8.1910	acetylornithine deacetylase, putative. metallo-peptidase, Clan MH, Family M18	Protease	1.03	2181	302	64.7	47.2	62.9	52.8	45.7	66.8	1.23	1.03	0.94	0.94	0.0931	0	0	0.2285	0.000951	1	0	0	0	1.13	-0.1865	0	1.82	0.926
Tb927.9.4940	presenilin-like aspartic peptidase, putative	Protease	1	1175	37	116.9	81.5	100	115.2	87.3	79.4	1.01	0.93	1.26	0.93	0.0931	0	0	0.0439	0.594	0	0	0	0	0.96	-0.5437	0	1.82	1.0496
Tb927.11.13590	hypothetical protein, conserved	ZUnknown	1	1172	734	18.3	28.6	25.6	12.2	16.5	13.7	1.5	1.73	1.87	1.5	0.7655	0	0	0.0299	0.839	0	0	0	0	1.01	-0.2925	0	1.82	1.0496
Tb927.4.2800	R3H-associated N-terminal domain containing protein, putative	ZUnknown	1			79.6	80.5	167.7	44.2	60.3	110.3	1.8	1.33	1.52	1.33	0.6323	0	0	-0.8021	9.07e-44	1	0	0	1	#N/A	1.5722	0	1.82	1.0566
Tb927.6.1790	hypothetical protein	ZUnknown	1		4345	96.4	88.6	78.3	92.9	46.9	38.3	1.04	1.89	2.04	1.04	0.7283	0	0	-1.2868	4.74e-05	1	0	0	1	0.75	0.2499	0	1.82	1.1043
Tb927.7.1190	regulator of chromosome condensation, putative	Cell.cycle	1			57.8	43.1	253.3	96.5	132.1	250.6	0.6	0.33	1.01	0.33	-0.6289	0	0	0.0908	0.0846	0	0	0	0	#N/A	-0.2191	0	1.82	0.9336
Tb927.6.1680	Mitochondrial tRNA import	Mito.biogenesis	1			92.7	60.2	120.1	80.1	77.1	87.2	1.16	0.78	1.38	0.78	0.1462	0	0	0.0122	0.887	0	0	0	0	#N/A	-0.0823	0	1.82	0.9486
Tb927.9.2450	electron transport protein SCO1/SCO2, putative	Mito.e.transport	1			46.5	58.1	67.6	28.7	22.3	21.9	1.62	2.61	3.09	1.62	1.2869	0	0	0.6612	8.22e-18	1	0	1	0	#N/A	1.0774	0	1.82	1.111
Tb927.5.450	NADH-ubiquinone oxidoreductase, mitochondrial, putative	Mito.e.transport	1.83			204.9	616.8	399	102.7	100.8	123	2	6.12	3.24	2	1.9209	0	0	0.5295	5.14e-16	1	0	0	0	#N/A	-0.1186	0	1.82	1.1309
Tb927.10.5440	RNA editing endoribonuclease (KREN2)	Mito.RNA	1			48.6	32.5	77.7	59.8	43	58.4	0.81	0.76	1.33	0.76	-0.0489	0	0	0.1727	0.016	1	0	0	0	#N/A	-0.3715	0	1.82	1.0496
Tb927.10.10200	hypothetical protein, conserved, no yeast homologue.	ZUnknown	1			69.9	31.9	74.2	83.7	52.3	85.3	0.84	0.61	0.87	0.61	-0.3708	0	0	0.1479	0.0448	1	0	0	0	#N/A	0.3444	0	1.82	0.9486
Tb927.10.3880	hypothetical protein, conserved	ZUnknown	1			136.5	69.2	137.3	162.4	151.1	167.2	0.84	0.46	0.82	0.46	-0.5009	0	0	0.1848	0.00147	1	0	0	0	#N/A	-0.2836	0	1.82	0.9561
Tb927.10.7580	hypothetical protein, conserved	ZUnknown	1			53.4	21.2	126.5	94.8	79.3	141.3	0.56	0.27	0.9	0.27	-0.7942	0	0	0.0303	0.657	0	0	0	0	#N/A	-0.3747	0	1.82	0.9635
Tb927.9.11130	unc-50 related protein homolog	ZUnknown	1			118.8	83.1	61.8	132.1	104	77.1	0.9	0.8	0.8	0.8	-0.263	0	0	0.1979	0.0159	1	0	0	0	#N/A	0.0439	0	1.82	0.9709
Tb927.8.6530	SET domain containing protein, putative	ZUnknown	1			30.7	18	54.2	31.4	37.1	53.9	0.98	0.49	1.01	0.49	-0.2746	0	0	-0.3898	3.11e-06	1	0	0	0	#N/A	-0.2568	0	1.82	0.9855
Tb927.3.4740	NAD-dependent glycerol-3-phosphate dehydrogenase N-terminus, putative	ZUnknown	2.01			37.6	32	81.6	61.8	71.1	44.5	0.61	0.45	1.83	0.45	-0.0539	0	0	0.2209	0.00654	1	0	0	0	#N/A	-0.3524	0	1.82	1.2203
Tb927.2.950	paraflagellar rod protein PFC13	Cytoskeleton	17.69	6139	1883	1632.8	578.8	1650.5	1847.2	717.6	1452.6	0.88	0.81	1.14	0.81	-0.0842	0	0	-0.5604	8.73e-21	1	0	0	0	0.94	-0.2229	0	1.81	0.8875
Tb927.11.3290	p166, Tripartite attachment complex component	Cytoskeleton	1	4934	421	80.4	66.2	213.9	80.4	105.2	201.9	1	0.63	1.06	0.63	-0.1574	0	0	-0.2539	2.31e-08	1	0	0	0	1.05	-0.3116	0	1.81	0.9635
Tb927.7.3040	hypothetical protein, conserved	ZUnknown	1	4905	2612	137.7	120.1	307.3	97.2	89.4	148.9	1.42	1.34	2.06	1.34	0.6841	0	0	-0.0541	0.414	0	0	0	0	0.97	0.2223	0	1.81	0.9336
Tb927.1.4420	ABC transporter, putative	Transporter	1	4058	1063	30.7	33.5	184.2	38.3	37.4	60.2	0.8	0.9	3.06	0.8	0.666	0	0	0.4293	1.01e-13	1	0	0	0	1.19	-0.2139	0	1.81	1.3618
Tb927.2.3930	DNA replication licensing factor MCM3	DNA	1.34	3243	393	53.6	28.1	128.6	65.3	59.7	113.1	0.82	0.47	1.14	0.47	-0.304	0	0	-0.2096	0.000251	1	0	0	0	0.98	-0.0879	0	1.81	0.9855
Tb927.8.2830	hypothetical protein, conserved	ZUnknown	1	2891	1300	13.6	11.4	29	15.6	20.4	29.8	0.87	0.56	0.97	0.56	-0.3219	0	0	0.1912	0.0335	1	0	0	0	1.02	-0.1663	0	1.81	0.9107
Tb927.5.1600	hypothetical protein, conserved	ZUnknown	1	2818	942	91.4	92.2	295.3	46	43.6	78.7	1.99	2.11	3.75	1.99	1.3877	0	0	-0.1583	0.02	1	0	0	0	1.27	0.1391	0	1.81	1.0215
Tb927.3.2870	multicopper oxidase, putative	ZUnknown	1	2742	593	484.1	580	464.7	338.5	161.2	154.2	1.43	3.6	3.01	1.43	1.4222	0	0	-0.2769	0.000197	1	0	0	0	0.89	-0.2845	0	1.81	1.1043
Tb927.9.2620	Domain of unknown function (DUF4460), putative	ZUnknown	1	2331	291	62.2	45.3	133.7	83.7	70.2	90.1	0.74	0.65	1.48	0.65	-0.0639	0	0	0.3293	2.24e-08	1	0	0	0	1.05	-0.3362	0	1.81	1.1243
Tb927.11.5990	LSU ribosomal protein, mitochondrial, putative	Mito.translation	1	2260	403	91.4	64.1	97.2	85.7	68.5	62.1	1.07	0.94	1.57	0.94	0.255	0	0	-0.5291	9.08e-13	1	0	0	0	0.96	-0.2426	0	1.81	0.9928
Tb927.1.820	kelch domain-containing protein	ZUnknown	1	2181	561	74.6	114	129.9	62.7	50.5	49.4	1.19	2.26	2.63	1.19	1.0191	0	0	-0.076	0.399	0	0	0	0	1.17	-0.1375	0	1.81	0.8953
Tb927.7.6470	O-sialoglycoprotein endopeptidase, putative	Protease	1	2114	900	21.4	10.8	48.2	26.1	21.7	47	0.82	0.5	1.03	0.5	-0.3523	0	0	0.1253	0.198	0	0	0	0	1.07	-0.1868	0	1.81	1
Tb927.2.3190	Got1/Sft2-like family, putative	ZUnknown	1	1954	509	66.1	44.5	28.9	45	37.3	25.4	1.47	1.19	1.14	1.14	0.341	0	0	-0.2521	0.0412	1	0	0	0	1.15	0.0017	0	1.81	0.903
Tb927.9.9220	hypothetical protein, conserved	ZUnknown	1	1850	127	143.1	186.3	267.6	114.5	107.8	117.3	1.25	1.73	2.28	1.25	0.8101	0	0	-0.8041	4.59e-37	1	0	0	1	1.2	-0.3841	0	1.81	1.1506
Tb927.10.13840	Domain of unknown function (DUF4475), putative	ZUnknown	1	1839	681	91.6	123	167.9	63.9	42.6	60.3	1.43	2.89	2.78	1.43	1.2429	0	0	0.8694	2.6e-40	1	0	1	0	1.17	0.3629	0	1.81	1.0072
Tb927.11.9160	ATPase-like protein, putative	Enzyme	1	1747	269	31	54	80.9	31	25.9	21	1	2.08	3.85	1	1.2079	0	0	-0.1013	0.385	0	0	0	0	0.94	-0.0857	0	1.81	1.1635
Tb927.5.2180	hypothetical protein, conserved	ZUnknown	3.07	1603	111	73.8	103.8	128.8	89.6	70.5	71.3	0.82	1.47	1.81	0.82	0.4507	0	0	0.0704	0.374	0	0	0	0	0.9	-0.3649	0	1.81	1.1243
Tb927.10.9730	hypothetical protein, conserved	ZUnknown	1	1523	455	166.7	239.6	209.5	104.6	104.6	106.3	1.59	2.29	1.97	1.59	0.9635	0	0	-0.4943	2.1e-13	1	0	0	0	1	-0.2088	0	1.81	1.0356
Tb927.5.3950	2OG-Fe(II) oxygenase superfamily, putative	ZUnknown	1	1402	330	52.1	40.4	71.2	52.3	46.7	62.7	1	0.87	1.14	0.87	0.0048	0	0	-0.0897	0.273	0	0	0	0	1.03	-0.014	0	1.81	0.9107
Tb927.11.1650	hypothetical protein, conserved	ZUnknown	1	1075	429	62.2	94.7	60.5	45.4	36.6	31.8	1.37	2.59	1.9	1.37	0.9659	0	0	-0.338	0.000836	1	0	0	0	0.96	-0.1095	0	1.81	0.926
Tb927.6.1690	AUT2/APG4/ATG4 cysteine peptidase, putative, (ATG4.2)	Lysosome	1			106.2	222.3	153.7	74	45.5	37.6	1.44	4.89	4.09	1.44	1.7963	0	0	0.5054	2.27e-08	1	0	0	0	#N/A	-0.3665	0	1.81	1.281
[truncated: 4,899 more rows]

## Sheet: 2. RPM CDS and UTR all
GeneID	Suffix	Annotation	Category	CDS Bound/unbound 1	CDS Bound/unbound 2	CDS Bound/unbound 3	UTR Bound/unbound 1	UTR Bound/unbound 2	UTR Bound/unbound 3	CDS lowest enrichment	UTR lowest enrichment
Tb927.11.15840	UTR	Amino acid transporter AAT16 Lys, Arg, high affinity Lysine	Amino.acid.transport	1.14	3.65	4.54	2.35	8.73	5.05	1.14	2.35
Tb927.11.15860	UTR	Amino acid transporter AAT16 Lys, Arg, high affinity Lysine	Amino.acid.transport	1.21	3.98	4.52	2.64	10.11	4.75	1.21	2.64
Tb927.4.4000	UTR	amino acid transporter, putative	Amino.acid.transport	1.62	4.17	12.16	3.11	11.51	7.91	1.62	3.11
Tb927.4.4020	UTR	amino acid transporter, putative	Amino.acid.transport	2.52	3.62	4.56	2.01	6.21	4.19	2.52	2.01
Tb927.4.4730	UTR	amino acid transporter, putative (AATP11)	Amino.acid.transport	1.19	4.03	13.67	2.39	8.54	15.12	1.19	2.39
Tb927.8.7610	UTR	AAT7	Amino.acid.transport	1.05	2.93	2.81	2.97	11.92	4.44	1.05	2.97
Tb927.8.7620	UTR	AAT7	Amino.acid.transport	1.31	3.11	3.26	2.31	7.48	4.27	1.31	2.31
Tb927.8.7630	UTR	AAT7	Amino.acid.transport	1.49	3.08	3.11	2.24	6.59	3.7	1.49	2.24
Tb927.7.1210	UTR	regulator of chromosome condensation, putative	Cell.cycle	1.17	1.11	3.95	3.26	5.51	2.69	1.11	2.69
Tb927.8.1150	UTR	KKT9 Kinetochore protein	Cell.cycle	2.95	3.68	3.17	2.35	5.59	3.87	2.95	2.35
Tb927.9.10920	UTR	KKT3, PK6 protein kinase,	Cell.cycle	0.94	1.4	2.48	2.05	6.43	3.47	0.94	2.05
Tb927.4.2970	UTR	chaperone DNAj, putative, J12	Chaperone	3.32	4.12	3.89	2.1	3.4	2.94	3.32	2.1
Tb927.1.3560	UTR	MAP2 microtubulue associated protein	Cytoskeleton	1.28	1.47	1.48	2.15	5.14	2.34	1.28	2.15
Tb927.11.2400	UTR	Flabarin-like	Cytoskeleton	2.74	5.17	1.53	2.03	5.84	2.39	1.53	2.03
Tb927.4.4040	UTR	hypothetical protein, conserved	Cytoskeleton	3.07	2.75	1.81	2.83	5.55	3.25	1.81	2.83
Tb927.7.4070	UTR	calpain-like cysteine peptidase, putative,cysteine peptidase, Clan CA, family C2, putative	Cytoskeleton	1.16	1.8	0.93	2.28	10.8	2.75	0.93	2.28
Tb927.8.7840	UTR	dynein heavy chain, putative, not a DHC in Wickstead analysis	Cytoskeleton	1.77	1.65	5.72	2.22	8.34	6.81	1.65	2.22
Tb927.11.5670	UTR	MND1 homologue, putative involvement in meiosis	DNA	1.89	2.27	2.05	2.43	14.89	3.58	1.89	2.43
Tb927.10.7850	UTR	protein-L-isoaspartate O-methyl transferase, putative	Enzyme	2.47	3.62	1.62	2.46	5.71	2.01	1.62	2.01
Tb927.1.4910	UTR	ESAG1, putative	ESAG	2.07	2.71	1.35	2.98	11.13	2.9	1.35	2.9
Tb927.11.1490	UTR	receptor-type adenylate cyclase GRESAG 4, putative (fragment)	ESAG	1.03	1.03	6.32	2.24	3.93	4.24	1.03	2.24
Tb927.9.15660	UTR	ACP6	ESAG	1.32	1.4	9.94	2.15	4.74	3.43	1.32	2.15
Tb927.11.6330	UTR	6-phosphoglucolactonase	Glucose.glycerol	0.59	0.28	0.58	2.05	5.06	4.99	0.28	2.05
Tb927.4.4250	UTR	UDP-Gal or UDP-GlcNAc-dependent glycosyltransferase, putative	Glycans	1.63	1.69	2.79	2.35	5.4	4.21	1.63	2.35
Tb927.4.5240	UTR	UDP-Gal or UDP-GlcNAc-dependent glycosyltransferase, putative	Glycans	1.37	3.31	2.78	3.59	6.14	3.32	1.37	3.32
Tb927.5.2350	UTR	glycosyltransferase (GlcNAc), putative	Glycans	2.28	3.43	10.84	2.3	5.9	8.36	2.28	2.3
Tb927.6.1820	UTR	Phosphatidic acid phosphatase	Glycans	1	2.18	2.11	3.41	6.72	2.19	1	2.19
Tb927.7.300	UTR	N-acetylglucosaminyltransferase II GT15	Glycans	1.08	1.4	1.03	2.1	3.26	2.62	1.03	2.1
Tb927.11.1480	UTR	GRESAG 4, putative receptor-type adenylate cyclase	GRESAG	1.3	1.08	5.75	2.93	4.28	7.08	1.08	2.93
Tb927.4.3750	UTR	GRESAG 4, putative receptor-type adenylate cyclase	GRESAG	1.32	0.88	3.8	3.51	7.44	8.53	0.88	3.51
Tb927.5.650	UTR	GRESAG 4, putative receptor-type adenylate cyclase	GRESAG	0.95	1.08	11.27	3.67	14.13	9.61	0.95	3.67
Tb927.1.580	UTR	phosphate-repressible phosphate permease, putative	Ions	1.19	2.18	5.6	2.52	4.05	5.45	1.19	2.52
Tb927.10.13400	UTR	Phosphatidic acid phostphatase, putative	Lipids	2.75	6.68	5.37	4.58	14.29	4.02	2.75	4.02
Tb927.3.1700	UTR	DAG acyltransferase	Lipids	2.05	5.88	6.69	2.02	6.59	5.82	2.05	2.02
Tb927.8.3400	UTR	palmitoyl acyltransferase 12, putative	Lipids	2.36	4.35	6.75	2.51	9.9	7.38	2.36	2.51
Tb927.8.8020	UTR	monoglyceride lipase, putative	Lipids	1.53	2.37	3.2	2.15	12.33	4.17	1.53	2.15
Tb927.9.1610	UTR	CDP-diacylglycerol--inositol 3-phosphatidyltransferase, putative	Lipids	1.81	4.87	3.35	2.16	5.31	3.04	1.81	2.16
Tb927.9.4190	UTR	fatty acyl CoA syntetase 1 (ACS1)	Lipids	0.72	0.95	1.18	2.94	14.93	3.01	0.72	2.94
Tb927.1.5030	UTR	leucine-rich repeat protein (LRRP)	LRRP	1.04	1.19	3.23	2.94	9.43	3.56	1.04	2.94
Tb927.7.290	UTR	leucine-rich repeat protein (LRRP)	LRRP	1.32	2.97	5.48	2.2	5.4	4.92	1.32	2.2
Tb927.7.3320	UTR	ATG12/APG12, putative (ATG12)	Lysosome	1.67	5.53	3.81	3.31	5.71	4.04	1.67	3.31
Tb927.7.5900	UTR	ATG8/AUT7/APG8/PAZ2, putative,ubiquitin-like protein (ATG8A)	Lysosome	2.48	4.19	3.36	2.78	5.53	3.04	2.48	2.78
Tb927.10.10260	UTR	EP1 procyclin	Membrane.protein	1.55	7.99	3.36	2.49	10.2	3.37	1.55	2.49
Tb927.10.11220	UTR	procyclic form surface glycoprotein (PSSA-2)	Membrane.protein	1.19	1.78	2.35	3.69	8.4	3.08	1.19	3.08
Tb927.4.3500	UTR	Amastin surface glycoprotein, putative	Membrane.protein	1.41	2.57	3.39	2.88	4.32	3.36	1.41	2.88
Tb927.5.640	UTR	trans-sialidase, putative,neuraminidase, putative	Membrane.protein	0.8	0.39	1.32	3.74	8.61	3.23	0.39	3.23
Tb927.6.510	UTR	GPEET2 procyclin	Membrane.protein	1.52	7.34	3.69	2.96	10.97	4.92	1.52	2.96
Tb927.10.14000	UTR	aconitase (ACO)	Mito.citric.acid.cycle	0.86	0.55	1.51	3.04	14.01	4.14	0.55	3.04
Tb927.10.730	UTR	ATP synthase, putative	Mito.e.transport	1.54	1.08	1.48	2.57	7.12	2.03	1.08	2.03
Tb927.11.13650	UTR	cytochrome b5, putative (CYB5)	Mito.e.transport	3.27	3.25	2.14	5.74	5.74	2.56	2.14	2.56
Tb927.11.15550	UTR	NADH-cytochrome b5 reductase, putative (B5R)	Mito.e.transport	2.22	2.1	5.27	2.18	4.06	4.3	2.1	2.18
Tb927.8.1240	UTR	electron transfer flavoprotein-ubiquinone oxidoreductase, putative	Mito.e.transport	1.46	1.91	3.29	2	4.58	3.68	1.46	2
Tb927.9.5960	UTR	SDH2C succinate dehydrogenase (complex II) subunit	Mito.e.transport	2.83	4.33	3.52	2.12	5.4	3.71	2.83	2.12
Tb927.2.4240	UTR	GTP binding protein, putative	Mito.pathway	1.57	2.2	2.44	2.56	4.87	2.15	1.57	2.15
Tb927.2.6180	UTR	iron/ascorbate oxidoreductase family protein, putative	Mito.pathway	1.98	2.26	5.41	2.47	5.09	6.46	1.98	2.47
Tb927.3.2880	UTR	Mitochondrial ATP synthase subunit, putative	Mito.pathway	3.14	9.36	6.58	3.5	13.91	5.61	3.14	3.5
Tb927.3.3680	UTR	hypothetical protein, conserved	Mito.pathway	7.34	9.62	3.04	7.93	7.51	2.61	3.04	2.61
Tb927.8.6630	UTR	hypothetical protein	Mito.pathway	2.64	9.67	11.51	2.05	4.67	9.63	2.64	2.05
Tb927.11.870	UTR	mitochondrial ribosomal protein l23	Mito.translation	2.23	2.48	1.73	2.22	3.62	2.02	1.73	2.02
Tb927.5.1510	UTR	Mitochondrial SSU ribosomal protein, putative	Mito.translation	0.95	0.77	1.51	3.49	10.29	3.18	0.77	3.18
Tb927.11.5290	UTR	mitochondrial carrier protein, MCP9	Mito.transport	0.95	3.12	3.21	3.76	10.52	3.29	0.95	3.29
Tb927.5.1360	UTR	nucleoside 2-deoxyribosyltransferase (NDRT)	Nucleotides	2.12	5.37	2.27	2.54	6.64	2.59	2.12	2.54
Tb927.7.1790	UTR	Adenine phosphoribosyltransferase, putative	Nucleotides	2.6	3.55	3.71	2.86	4.36	3.2	2.6	2.86
Tb927.7.4480	UTR	adenosine 5'-monophosphoramidase, putative	Nucleotides	2.45	5.93	2.33	3.44	7.87	2.87	2.33	2.87
Tb927.9.7470	UTR	purine nucleoside transporter NT10	Nucleotides	2.37	6.78	17.61	2	9.33	7.99	2.37	2
Tb927.9.7550	UTR	adenylosuccinate lyase, putative	Nucleotides	1.14	2.86	5.15	2.38	2.47	4.33	1.14	2.38
Tb927.7.3360	UTR	Farnesyl-pyrophosphate synthase	Prenylation	1.1	1.11	1.85	2.23	2.81	2.33	1.1	2.23
Tb927.1.2150	UTR	calpain-like protein fragment, putative,calpain-like cysteine peptidase, Clan CA, family C2	Protease	3.07	5.14	7.49	2.86	5.52	8.39	3.07	2.86
Tb927.1.1530	UTR	protein kinase, putative	Protein.kinase	1.15	0.99	2.86	2.67	9.79	2.31	0.99	2.31
Tb927.10.3340	UTR	protein kinase, putative	Protein.kinase	1.45	1.24	6.71	2.8	14.62	4.85	1.24	2.8
Tb927.10.5930	UTR	NEK17 protein kinase	Protein.kinase	1.13	0.83	2.63	3.45	23.55	11.39	0.83	3.45
Tb927.11.15010	UTR	NEK21 protein kinase	Protein.kinase	2.28	3.52	13.95	3	4.22	9.28	2.28	3
Tb927.6.1780	UTR	MAPK4 protein kinase	Protein.kinase	2.12	3.8	3.82	2.09	6.87	3.65	2.12	2.09
Tb927.6.3430	UTR	NEK10 protein kinase	Protein.kinase	1.58	0.77	2.77	2.18	5.48	2.41	0.77	2.18
Tb927.7.4090	UTR	serine/threonine-protein kinase, putative	Protein.kinase	1.23	0.91	3.13	2.11	3.15	3.46	0.91	2.11
Tb927.4.3620	UTR	protein phosphatase 1, putative	Protein.phosphatase	1.97	1.98	2.69	3.82	6.18	3.45	1.97	3.45
Tb927.4.230	UTR	DNA-directed RNA polymerase III, pseudogene	Pseudogene	1.35	1.07	1.85	2.95	8.37	4.09	1.07	2.95
Tb927.1.1770	UTR	glutaredoxin GRX2	Redox	3.04	11.52	7.16	3.37	11.71	5.85	3.04	3.37
Tb927.6.4030	UTR	superoxide dismutase, putative	Redox	2.53	8.69	4.3	2	7.88	4.15	2.53	2
Tb11.1800	UTR	retrotransposon hot spot protein (RHS, pseudogene), putative	RHS	2.75	2.44	2.7	2.31	10.04	3.81	2.44	2.31
Tb927.2.1130	UTR	retrotransposon hot spot protein (RHS3, pseudogene), putative	RHS	1.54	1.37	1.57	3.27	12.94	3.95	1.37	3.27
Tb927.2.480	UTR	retrotransposon hot spot protein (RHS2, pseudogene), putative	RHS	1.84	1.59	1.56	2.93	14.24	5.97	1.56	2.93
Tb927.6.150	UTR	retrotransposon hot spot protein (RHS3, pseudogene), putative	RHS	1.81	2.02	1.95	2.78	13.15	4.02	1.81	2.78
Tb927.6.5160	UTR	retrotransposon hot spot protein (RHS3, pseudogene), putative	RHS	1.39	0.96	1.11	2.34	8.86	4.45	0.96	2.34
Tb927.3.4360	UTR	40S ribosomal protein S15A	Ribosome	1.59	4.79	1.89	2.41	6.39	2.04	1.59	2.04
Tb927.7.5380	UTR	DRBD12	RNA.binding	2.78	2.18	12.04	2.08	4.16	19.33	2.18	2.08
Tb927.3.1250	UTR	RPB10 DNA-directed RNA polymerase I subunit	RNA.synthesis	1.33	4.41	3.06	2.56	4.44	2.71	1.33	2.56
Tb927.7.2600	UTR	class I transcription factor A, subunit 7 (CITFA-7)	RNA.synthesis	3.62	7.09	5.78	2.23	6.79	4.78	3.62	2.23
Tb927.6.2050	UTR	ribosome biogenesis regulatory protein (RRS1), putative	rRNA.tRNA.process	0.81	0.42	0.57	4.51	14.58	2.82	0.42	2.82
Tb927.10.8770	UTR	TBC-Q1, likely GAP, in Tc vacuolar proteome	Signalling	1.96	3.11	3.51	2.66	5.94	3.89	1.96	2.66
Tb927.10.8920	UTR	TbGRP ras-like small GTPase	Signalling	3	12.71	5.42	2.82	11.37	5.66	3	2.82
Tb927.7.5940	UTR	Protein Associated with Differentiation (TbPAD2)	Signalling	1.13	3.28	4.65	2.75	11.92	10.99	1.13	2.75
Tb927.5.2260	UTR	META-domain protein family (5.2160, 2170, 2200, 2230, 2260)	Translation	2.13	7.03	2.56	4	11.47	2.87	2.13	2.87
Tb927.6.1520	UTR	Aquaglyceroporin 1	Transporter	1.24	3.47	2.26	2.08	3.65	2.09	1.24	2.08
Tb927.7.5990	UTR	protein associated with differentiation 7, PAD7	Transporter	1.36	2.48	4.38	2.07	6.32	4.39	1.36	2.07
Tb927.9.11810	UTR	membrane transporter protein, putative	Transporter	1.63	3.31	4.64	2.95	8.19	5.46	1.63	2.95
Tb927.1.4540	UTR	cyclin-like F-box protein (CFB1A)	Ubiquitin.proteasome	2.05	2.93	10.42	3.23	6.3	10.8	2.05	3.23
Tb927.10.2210	UTR	ubiquitin carboxyl-terminal hydrolase, Clan CA cysteine peptidase, family C12, putative	Ubiquitin.proteasome	2.01	2.35	7.82	2.65	5.89	6.85	2.01	2.65
Tb927.11.13940	UTR	ubiquitin-conjugating enzyme e2, putative	Ubiquitin.proteasome	1.83	3.04	4.31	2.06	5.14	3.06	1.83	2.06
Tb927.5.3745	UTR	ring-box protein, putative	Ubiquitin.proteasome	2.37	8.82	2.56	2.25	9.09	2.36	2.37	2.25
Tb927.6.3140	UTR	Ubiquitin-like protein	Ubiquitin.proteasome	1.98	5.73	4.25	2.98	8.81	4.73	1.98	2.98
Tb927.9.5650	UTR	E2-like ubiquitin-conjugation enzyme, putative	Ubiquitin.proteasome	2.12	9.54	3.26	2.95	12.69	3.49	2.12	2.95
Tb927.10.2340	UTR	hypothetical protein, conserved, t-SNARE like	Vesicular.transport	1.16	6.13	3.64	3.53	11.84	3.24	1.16	3.24
Tb927.11.3080	UTR	vesicular protein trafficking mediator, putative	Vesicular.transport	2.32	5.33	5.28	2.92	6.78	5.67	2.32	2.92
Tb927.11.4570	UTR	Ras-related protein Rab5B	Vesicular.transport	1.78	4.08	5.8	2.09	5.86	6.12	1.78	2.09
Tb927.11.5540	UTR	emp24/gp25L/p24 family/GOLD, putative	Vesicular.transport	2.56	2.91	2.38	2.4	4.22	2.46	2.38	2.4
Tb927.11.9630	UTR	vesicle protein SN7 family protein.	Vesicular.transport	1.8	1.09	1.32	2.1	5.64	3.09	1.09	2.1
Tb927.4.4810	UTR	hypothetical protein, conserved	Vesicular.transport	1.2	1.29	1.75	2.35	2.65	2.21	1.2	2.21
Tb927.8.8140	UTR	small GTP-binding rab protein, putative	Vesicular.transport	1.89	2.19	2.72	2.3	9.86	2.44	1.89	2.3
Tb927.10.4160	UTR	predicted zinc finger protein	Zinc.finger	1.61	1.55	1.26	2.54	5.46	3.37	1.26	2.54
Tb927.6.4810	UTR	zinc-binding protein (Yippee), putative	Zinc.finger	3.2	4.71	4.27	3.79	6.4	4.83	3.2	3.79
Tb927.7.690	UTR	zinc finger protein, putative	Zinc.finger	2.47	2.65	8.33	2.43	5.42	8.74	2.47	2.43
Tb927.8.7790	UTR	zinc finger domain, LSD1 subclass, putative	Zinc.finger	2.06	4.98	2.87	2.32	5.62	2.87	2.06	2.32
Tb09.v4.0059	UTR	hypothetical protein	ZUnknown	2.17	4.44	6.94	3.97	14.6	4.36	2.17	3.97
Tb927.1.3550	UTR	hypothetical protein	ZUnknown	2.1	3.99	20.35	2	3.73	8.68	2.1	2
Tb927.1.400	UTR	hypothetical protein, conserved	ZUnknown	3.69	9.03	9.58	2.87	12.31	7.36	3.69	2.87
Tb927.1.690	UTR	hypothetical protein, conserved	ZUnknown	2.22	4.48	2.56	3.12	8.77	2.6	2.22	2.6
Tb927.10.13840	UTR	Domain of unknown function (DUF4475), putative	ZUnknown	1.45	2.32	2.86	3.17	5.47	3.29	1.45	3.17
Tb927.10.140	UTR	hypothetical protein	ZUnknown	3.33	5	4.75	3.01	6.47	13.32	3.33	3.01
Tb927.10.14440	UTR	b9 domain-containing protein 1 (b9d1)	ZUnknown	1.24	3.47	2.8	2.78	5.51	3.4	1.24	2.78
Tb927.10.14450	UTR	hypothetical protein, conserved	ZUnknown	1.15	3.38	7.6	2.76	7.8	8.13	1.15	2.76
Tb927.10.14480	UTR	hypothetical protein, conserved	ZUnknown	1.43	1.1	4.32	2.32	4.85	5.15	1.1	2.32
Tb927.10.14560	UTR	TPR repeat, putative	ZUnknown	0.88	0.65	1.19	2.81	13.75	5.42	0.65	2.81
Tb927.10.2660	UTR	hypothetical protein, conserved	ZUnknown	2.03	3.32	2.61	4.16	4.27	2.43	2.03	2.43
Tb927.10.2850	UTR	hypothetical protein	ZUnknown	2.18	4.96	7.48	2.46	7.36	6.54	2.18	2.46
Tb927.10.2930	UTR	hypothetical protein, conserved	ZUnknown	0.92	0.69	0.53	2.58	9.32	4.86	0.53	2.58
Tb927.10.3620	UTR	Laminin-like protein, putative	ZUnknown	1.98	3.35	2.06	3.37	5.92	2.38	1.98	2.38
Tb927.10.3680	UTR	hypothetical protein, conserved	ZUnknown	1.74	6.08	9.61	2.18	7.41	9.6	1.74	2.18
Tb927.10.3960	UTR	hypothetical protein, conserved	ZUnknown	1.52	1.84	1.65	2.03	4.26	2.41	1.52	2.03
Tb927.10.410	UTR	hypothetical protein, conserved	ZUnknown	2.16	3.98	7.8	2.09	13.63	6.38	2.16	2.09
Tb927.10.4750	UTR	hypothetical protein, conserved	ZUnknown	2.64	4.6	7.16	2.04	6.71	6.87	2.64	2.04
Tb927.10.4810	UTR	hypothetical protein, conserved	ZUnknown	1.82	4.44	2.5	2.79	5.95	2.57	1.82	2.57
Tb927.10.6210	UTR	TPR repeat, putative	ZUnknown	1.8	2.68	5.52	2.42	9.32	7.14	1.8	2.42
Tb927.10.810	UTR	pentatricopeptide repeat domain containing protein, putative	ZUnknown	1.19	1.75	2.89	2.23	7.33	2.71	1.19	2.23
Tb927.10.8570	UTR	hypothetical protein, conserved	ZUnknown	2.08	2.51	2.96	2.63	6.43	4.08	2.08	2.63
Tb927.10.9300	UTR	adiponectin receptor protein 1	ZUnknown	1.9	9.52	6.09	2.27	9.19	5.18	1.9	2.27
Tb927.11.10920	UTR	hypothetical protein, conserved	ZUnknown	3.08	4.91	4.98	2.98	9.76	5.17	3.08	2.98
Tb927.11.11240	UTR	hypothetical protein, conserved	ZUnknown	2.3	2.63	1.93	3.79	4.77	2.26	1.93	2.26
Tb927.11.11970	UTR	hypothetical protein	ZUnknown	1.5	1.38	5.61	4.31	11.54	11.44	1.38	4.31
Tb927.11.14530	UTR	WLM domain containing protein, putative	ZUnknown	1.19	1.13	1.61	2.62	7.54	2.4	1.13	2.4
Tb927.11.15200	UTR	hypothetical protein, conserved	ZUnknown	3.12	17	13.06	4.09	18.45	10.65	3.12	4.09
Tb927.11.1570	UTR	hypothetical protein, conserved no matches	ZUnknown	2.67	4.02	8.98	4.19	5.77	7.36	2.67	4.19
Tb927.11.16320	UTR	hypothetical protein, conserved	ZUnknown	1.88	6.72	3.54	2.64	9.75	3.77	1.88	2.64
Tb927.11.16520	UTR	hypothetical protein, conserved	ZUnknown	4.7	20.52	5.64	4.09	19.93	5.01	4.7	4.09
Tb927.11.16615	UTR	Protein of unknown function (DUF2638), putative	ZUnknown	3.06	15.52	5.16	2.93	10.21	4.76	3.06	2.93
Tb927.11.16710	UTR	hypothetical protein, conserved	ZUnknown	2.24	3.61	2.64	3.29	5.43	2.62	2.24	2.62
Tb927.11.1920	UTR	hypothetical protein	ZUnknown	3.24	3.89	7.85	3.46	8.05	8.64	3.24	3.46
Tb927.11.2150	UTR	hypothetical protein, conserved	ZUnknown	2.01	1.59	2.96	3.45	9.25	3.33	1.59	3.33
Tb927.11.3040	UTR	hypothetical protein	ZUnknown	4.5	42.56	12.95	4.64	31.96	13.3	4.5	4.64
Tb927.11.4670	UTR	hypothetical protein, conserved	ZUnknown	4.26	4.02	1.62	3.72	4.92	2	1.62	2
Tb927.11.480	UTR	small GTP-binding protein domain containing protein, putative	ZUnknown	1.97	6.95	5.38	2.37	10.6	6.88	1.97	2.37
Tb927.11.490	UTR	hypothetical protein, conserved	ZUnknown	2.78	5.42	2.77	2.62	6.77	2.51	2.77	2.51
Tb927.11.6060	UTR	Maf1, binds polIII promoters & represses transcription	ZUnknown	2.46	4.15	3.41	2	8.33	3.44	2.46	2
Tb927.11.6650	UTR	hypothetical protein	ZUnknown	0.96	0.75	3.6	2.26	8.46	5.25	0.75	2.26
Tb927.11.730	UTR	hypothetical protein	ZUnknown	2.22	3.54	4.04	2.05	5.45	2.31	2.22	2.05
Tb927.11.8320	UTR	hypothetical protein, conserved	ZUnknown	1.57	1.24	1.29	2.01	4.51	2.25	1.24	2.01
Tb927.11.9040	UTR	conserved protein	ZUnknown	1.75	6	2.28	3.5	11.08	3.43	1.75	3.43
Tb927.2.1740	UTR	hypothetical protein, conserved	ZUnknown	1.53	3.33	5.67	2.45	6.07	5.07	1.53	2.45
Tb927.2.1760	UTR	hypothetical protein, conserved	ZUnknown	1.98	1.58	2.35	2.79	6.82	4.5	1.58	2.79
Tb927.2.4150	UTR	hypothetical protein, conserved	ZUnknown	2.38	3.26	2.74	2.31	4.48	2.54	2.38	2.31
Tb927.2.4470	UTR	hypothetical protein, conserved	ZUnknown	1.17	1.84	3.77	2.35	9.48	2.7	1.17	2.35
Tb927.2.4480	UTR	hypothetical protein, conserved	ZUnknown	3.09	8.6	4.33	3.53	10.06	4.38	3.09	3.53
Tb927.2.4760	UTR	hypothetical protein, conserved, signal pep, lectin-like domain	ZUnknown	1.94	2.4	5.01	2.85	14.46	4.68	1.94	2.85
Tb927.2.5720	UTR	hypothetical protein, predicted by Mitocarta	ZUnknown	4.24	7	11.36	3.65	6.73	11.97	4.24	3.65
Tb927.3.1960	UTR	hypothetical protein, conserved	ZUnknown	2.32	4.78	3.55	2.56	7.53	3.55	2.32	2.56
Tb927.3.2480	UTR	Arv1-like family, putative	ZUnknown	1.99	3.69	2.8	2.98	5.52	3.02	1.99	2.98
Tb927.3.2990	UTR	hypothetical protein, conserved	ZUnknown	2.24	11.59	5.98	3.77	20.18	6.16	2.24	3.77
Tb927.3.3620	UTR	hypothetical protein, conserved	ZUnknown	3.41	3.19	2.01	2.13	3.47	2.07	2.01	2.07
Tb927.3.4160	UTR	XPC-binding domain/UBA/TS-N domain containing protein, putative	ZUnknown	2.14	3.18	2.92	2.3	3.86	2.79	2.14	2.3
Tb927.3.4250	UTR	hypothetical protein, conserved	ZUnknown	2.22	5.49	3.78	2.43	5.67	4.14	2.22	2.43
Tb927.3.4830	UTR	hypothetical protein	ZUnknown	1.78	4.38	4.75	2.72	3.86	2.84	1.78	2.72
Tb927.3.5130	UTR	exonuclease, putative	ZUnknown	2.16	3.82	2.3	4.31	18.2	2.01	2.16	2.01
Tb927.3.5200	UTR	hypothetical protein, conserved	ZUnknown	1.6	2.87	2.23	2.5	6.31	2.72	1.6	2.5
Tb927.3.5210	UTR	hypothetical protein, conserved	ZUnknown	1.8	3.45	8.35	2.63	6.66	7.66	1.8	2.63
Tb927.3.945	UTR	hypothetical protein	ZUnknown	1.98	4.41	7.43	2.49	5.62	6.73	1.98	2.49
Tb927.4.1040	UTR	hypothetical protein, conserved	ZUnknown	3.38	9.92	2.91	4.19	16.8	3.99	2.91	3.99
Tb927.4.2160	UTR	hypothetical protein, conserved	ZUnknown	3.25	7.24	4.76	3.26	6.48	4.91	3.25	3.26
Tb927.4.2280	UTR	hypothetical protein, conserved	ZUnknown	1.61	2.17	2.04	2.15	4.55	2.05	1.61	2.05
Tb927.4.5330	UTR	hypothetical protein	ZUnknown	1.16	0.69	1.29	2.35	8.55	4.2	0.69	2.35
Tb927.4.840	UTR	Histidine kinase-, DNA gyrase B-, and HSP90-like ATPase, putative	ZUnknown	1.53	2.27	2.85	2.09	3.3	2.85	1.53	2.09
Tb927.5.1050	UTR	hypothetical protein	ZUnknown	2.59	2.15	5.02	2.4	3.6	3.43	2.15	2.4
Tb927.5.1145	UTR	hypothetical protein	ZUnknown	1.97	4.6	2.96	2.26	5.11	2.69	1.97	2.26
Tb927.5.1380	UTR	hypothetical protein	ZUnknown	1.57	2.26	2.42	2.68	3.1	2.38	1.57	2.38
Tb927.5.1600	UTR	hypothetical protein, conserved	ZUnknown	2.02	1.7	3.85	2.17	4.67	3.84	1.7	2.17
Tb927.5.1780	UTR	hypothetical protein, conserved	ZUnknown	1.22	1.04	2.96	2.71	2.96	3.44	1.04	2.71
Tb927.5.1980	UTR	Galactose oxidase, central domain/Kelch motif containing protein, putative	ZUnknown	0.97	0.78	2.11	2.43	4.51	3.14	0.78	2.43
Tb927.5.2325	UTR	hypothetical protein	ZUnknown	3.38	3.84	1.7	3.43	14.68	2.94	1.7	2.94
Tb927.5.4450	UTR	hypothetical protein, conserved	ZUnknown	2.34	5.39	3.05	4.76	11.13	3.77	2.34	3.77
Tb927.6.1600	UTR	hypothetical protein, conserved	ZUnknown	1.27	4.06	3.32	2.43	6.74	3.29	1.27	2.43
Tb927.6.2860	UTR	WD domain, G-beta repeat, putative	ZUnknown	1.84	1.63	1.63	3.86	5.04	2.38	1.63	2.38
Tb927.6.3240	UTR	hypothetical protein, conserved	ZUnknown	3.64	6.35	5.26	2.94	6.69	5.28	3.64	2.94
Tb927.6.3860	UTR	leucyl/phenylalanyl-tRNA protein transferase, putative	ZUnknown	1.99	2.16	2.37	2.05	2.87	2.31	1.99	2.05
Tb927.6.4060	UTR	Eukaryotic protein of unknown function (DUF872), putative	ZUnknown	1.76	7.42	4.23	3.69	9.44	3.91	1.76	3.69
Tb927.6.5090	UTR	hypothetical protein, conserved	ZUnknown	1.52	1.28	3.34	2	2.42	3.72	1.28	2
Tb927.6.830	UTR	hypothetical protein, conserved	ZUnknown	2.09	4.91	2.98	2.13	4.85	2.62	2.09	2.13
Tb927.7.1810	UTR	hypothetical protein, conserved	ZUnknown	2.1	5.2	7.39	3.17	10.2	8.18	2.1	3.17
Tb927.7.1850	UTR	hypothetical protein, conserved	ZUnknown	1.89	4.84	6.86	3.22	11.06	7.16	1.89	3.22
Tb927.7.2985	UTR	hypothetical protein, conserved	ZUnknown	1.53	13.55	4.18	4.03	19.92	2.96	1.53	2.96
Tb927.7.3025	UTR	hypothetical protein, conserved	ZUnknown	1.35	12.23	3.65	3.81	18.36	2.94	1.35	2.94
Tb927.7.3670	UTR	TrkA-N domain containing protein, putative	ZUnknown	2.15	3.9	5.44	2.68	6.5	5.82	2.15	2.68
Tb927.7.4100	UTR	Domain of unknown function (DUF4201), putative	ZUnknown	1.36	1.47	1.45	2.24	5.78	2.11	1.36	2.11
Tb927.7.520	UTR	cytochrome b5-like Heme/Steroid binding domain containing protein, putative	ZUnknown	2.71	2.23	7.01	2.83	2.77	10.3	2.23	2.77
Tb927.8.1000	UTR	hypothetical protein, conserved	ZUnknown	2.54	4.12	3.8	2.29	7.34	3.76	2.54	2.29
Tb927.8.2330	UTR	hypothetical protein, conserved	ZUnknown	3.09	3.05	2	2.31	3.46	2.17	2	2.17
Tb927.8.4895	UTR	hypothetical protein	ZUnknown	1.4	3.27	5.57	4.51	16.01	5.74	1.4	4.51
Tb927.8.5270	UTR	hypothetical protein, conserved	ZUnknown	1.75	3.6	2.22	2.79	4.58	2.53	1.75	2.53
Tb927.8.5480	UTR	hypothetical protein, conserved	ZUnknown	2.47	1.67	2.72	2.02	2.25	2.37	1.67	2.02
Tb927.8.5590	UTR	SH3-binding, glutamic acid-rich protein, putative	ZUnknown	3.14	1.55	1.54	4.01	3.49	2.33	1.54	2.33
Tb927.8.6590	UTR	Outer mitochondrial membrane transport complex protein/Glutathione S-transferase, C-terminal domain containing protein, putative	ZUnknown	1.48	2.74	4.19	2.14	2.73	4.06	1.48	2.14
Tb927.8.7370	UTR	hypothetical protein	ZUnknown	3.21	1.74	1.76	2.83	5.24	2.05	1.74	2.05
Tb927.8.7660	UTR	amino acid transporter (pseudogene), putative	ZUnknown	1.07	4.08	4.64	2.63	9.83	4.18	1.07	2.63
Tb927.8.830	UTR	Protein of unknown function (DUF3608), putative	ZUnknown	0.63	0.3	1.57	3.3	13.33	4.1	0.3	3.3
Tb927.8.860	UTR	hypothetical protein, conserved	ZUnknown	1.84	2.28	1.63	2.03	2.68	2.05	1.63	2.03
Tb927.9.12000	UTR	LEM3 (ligand-effect modulator 3) family / CDC50 family, putative	ZUnknown	2.08	2.24	2.65	3.04	5.24	3.37	2.08	3.04
Tb927.9.13200	UTR	hypothetical protein	ZUnknown	4.27	12.23	2.24	6.51	21.2	3.58	2.24	3.58
Tb927.9.14130	UTR	hypothetical protein, conserved	ZUnknown	2.78	3.72	3.17	2.57	7.83	3.56	2.78	2.57
Tb927.9.1520	UTR	hypothetical protein, conserved, no clear yeast or human matches	ZUnknown	5.2	19.47	3.64	4.22	14.47	3.9	3.64	3.9
Tb927.9.1920	UTR	hypothetical protein, conserved	ZUnknown	2	5.05	2.47	2.2	9.04	2.52	2	2.2
Tb927.9.5020	UTR	HMG-box domain containing protein, putative	ZUnknown	2.81	7.07	4.16	4.17	15.4	4.03	2.81	4.03
Tb927.9.7100	UTR	hypothetical protein, conserved	ZUnknown	1.66	3.45	5.07	2.17	3.96	4.42	1.66	2.17
Tb927.9.8490	UTR	hypothetical protein, conserved	ZUnknown	1.92	6.92	4.21	2.58	6.32	3.43	1.92	2.58
Tb927.9.8655	UTR	hypothetical protein	ZUnknown	2.1	8.35	10.01	3.12	7.95	8.57	2.1	3.12
Tb927.9.9300	UTR	hypothetical protein, conserved	ZUnknown	2.36	2.89	7.2	2.69	4.33	9.74	2.36	2.69
Tb927.10.3420	UTR	Not an ORF	3_UTR	0.61	1.63	6.53	0.88	1.5	6.46	0.61	0.88
Tb927.10.6500	UTR	amino acid transporter, putative,amino acid permease, putative	Amino.acid.transport	1.85	1.58	1.69	2.8	3.27	1.78	1.58	1.78
Tb927.11.15950	UTR	amino acid transporter, putative	Amino.acid.transport	0.77	1.26	1.49	0.94	1.14	0.84	0.77	0.84
Tb927.11.6680	UTR	AAT15 Polyamine transporter 2 POT2	Amino.acid.transport	1.04	1.02	2.5	1.74	9.34	2.77	1.02	1.74
Tb927.4.3930	UTR	amino acid transporter, putative	Amino.acid.transport	0.84	1.66	2.63	1.25	3.26	2.61	0.84	1.25
Tb927.8.4700	UTR	AAT5 Arginine transporter	Amino.acid.transport	0.96	1.78	7.82	1.34	2.92	6.31	0.96	1.34
Tb927.8.5450	UTR	amino acid transporter, putative (AAT6)	Amino.acid.transport	0.69	0.41	0.46	0.82	0.83	0.61	0.41	0.61
Tb927.8.7680	UTR	amino acid transporter, putative	Amino.acid.transport	1.06	1.02	1.62	1.47	4	1.64	1.02	1.47
Tb927.8.7740	UTR	amino acid transporter, putative	Amino.acid.transport	0.87	2.38	6.99	1.6	3.36	5.22	0.87	1.6
Tb927.8.8220	UTR	amino acid transporter, putative	Amino.acid.transport	0.94	1.26	2.29	1.86	2.58	1.33	0.94	1.33
Tb927.8.8230	UTR	amino acid transporter, putative	Amino.acid.transport	0.97	1.3	2.32	1.24	2.99	1	0.97	1
Tb927.8.8290	UTR	AAT10 Ornithine transporter	Amino.acid.transport	1.29	1.75	1	1.04	1.99	0.63	1	0.63
Tb927.1.3000	UTR	amidohydrolase, putative	Amino.acids	0.88	0.28	0.52	1.09	0.44	0.47	0.28	0.44
Tb927.1.870	UTR	deoxyhypusine synthase, putative	Amino.acids	1.3	1.03	1.33	0.98	1.11	1.48	1.03	0.98
Tb927.10.11970	UTR	glutamine aminotransferase (GlnAT)	Amino.acids	1.63	1.82	3.03	1.2	2.33	2.94	1.63	1.2
Tb927.10.3660	UTR	aspartate aminotransferase	Amino.acids	1.26	1.1	1	0.44	0.62	0.75	1	0.44
Tb927.11.1540	UTR	isovaleryl-coA dehydrogenase, putative	Amino.acids	0.86	0.45	0.82	0.63	0.47	0.69	0.45	0.47
Tb927.11.1560	UTR	1,2-Dihydroxy-3-keto-5-methylthiopentene dioxygenase, putative	Amino.acids	2.56	1.83	1.03	1.53	1.6	1.03	1.03	1.03
Tb927.11.9590	UTR	S-adenosylhomocysteine hydrolase, putative	Amino.acids	0.81	0.23	0.29	0.82	0.43	0.29	0.23	0.29
Tb927.11.9670	UTR	glycine synthase, aminomethyltransferase, mitochondrial, putative (GCVT1)	Amino.acids	0.76	0.6	1.24	1	0.95	1.05	0.6	0.95
Tb927.2.4590	UTR	branched-chain amino acid aminotransferase, putative	Amino.acids	1.23	1.65	1.88	1.2	2.39	2.13	1.23	1.2
Tb927.2.4610	UTR	branched-chain amino acid aminotransferase, putative	Amino.acids	1.25	1.75	1.85	0.89	1.36	1.48	1.25	0.89
Tb927.7.4390	UTR	threonine synthase, putative	Amino.acids	0.76	0.9	1.68	0.92	6.49	1.55	0.76	0.92
Tb927.7.5560	UTR	glucosamine-fructose-6-phosphate aminotransferase, putative	Amino.acids	0.91	0.62	1.38	1.12	1.33	1.51	0.62	1.12
Tb927.7.7040	UTR	methylthioadenosine phosphorylase, putative (MTAP)	Amino.acids	1.06	0.38	0.23	0.46	0.18	0.13	0.23	0.13
Tb927.8.4750	UTR	amino acid transporter, AAT5, Arg, His, Lys	Amino.acids	1.6	2.34	5.22	1.29	2.83	5.25	1.6	1.29
Tb927.9.12320	UTR	cystathione gamma lyase, putative	Amino.acids	0.99	0.86	0.8	1.01	1.17	0.76	0.8	0.76
Tb927.9.6290	UTR	arginine kinase (AK)	Amino.acids	1.17	0.73	0.56	0.88	1.2	0.71	0.56	0.71
Tb927.1.4690	UTR	arginine N-methyltransferase (PRMT1)	Arg.methylation	0.94	0.64	0.56	0.52	0.54	0.58	0.56	0.52
Tb927.10.640	UTR	arginine N-methyltransferase, type II (PRMT5)	Arg.methylation	0.8	0.76	2.02	1	1.56	1.65	0.76	1
Tb927.11.13020	UTR	calmodulin	Calcium	0.79	0.45	0.17	0.89	0.55	0.24	0.17	0.24
Tb927.11.13030	UTR	calmodulin	Calcium	0.81	0.44	0.16	0.6	0.32	0.11	0.16	0.11
Tb927.11.13050	UTR	calmodulin	Calcium	0.79	0.44	0.16	0.6	0.32	0.11	0.16	0.11
Tb927.11.7060	UTR	acidocalcisomal pyrophosphatase (VSP1)	Calcium	1.22	1.27	1.27	1.5	3.25	2.37	1.22	1.5
Tb927.11.7080	UTR	acidocalcisomal pyrophosphatase (VSP1)	Calcium	1.29	1.12	0.91	1.96	2.89	0.76	0.91	0.76
Tb927.4.3330	UTR	hypothetical protein, conserved, EF hand	Calcium	2.41	4.7	1.63	2.51	3.81	1.25	1.63	1.25
Tb927.6.4710	UTR	calmodulin, putative	Calcium	0.85	0.53	1.35	1.39	1.95	1.5	0.53	1.39
Tb927.8.7980	UTR	vacuolar-type H( )-translocating pyrophosphatase (TVP1)	Calcium	0.47	0.23	0.25	0.65	1.43	0.43	0.23	0.43
Tb927.9.6130	UTR	calmodulin, putative	Calcium	1.67	2.67	1.64	2.17	2.74	1.68	1.64	1.68
Tb927.1.1030	UTR	NOP49	Cell.cycle	0.89	0.45	0.9	1.07	0.63	0.89	0.45	0.63
Tb927.10.1070	UTR	CRK1 cdc2- like protein kinase	Cell.cycle	2.23	3.38	3.07	1.43	2.74	2.23	2.23	1.43
Tb927.10.15690	UTR	anaphase promoting complex APC10	Cell.cycle	0.91	0.99	1.21	1.6	1.74	1.1	0.91	1.1
Tb927.10.6330	UTR	KKT1	Cell.cycle	0.55	0.12	0.9	0.58	0.45	0.79	0.12	0.45
Tb927.10.8710	UTR	Centrin3	Cell.cycle	1.41	0.83	0.57	1.31	0.77	0.53	0.57	0.53
Tb927.11.1000	UTR	kinetoplastid kinetochore protein 16	Cell.cycle	0.61	0.44	0.69	0.77	0.62	0.65	0.44	0.62
Tb927.11.10000	UTR	KKT16 Kinetochore protein	Cell.cycle	0.91	0.92	1.8	1.55	2.03	1.85	0.91	1.55
Tb927.11.1030	UTR	KKT7 Kinetochore protein	Cell.cycle	1.59	0.67	1.21	1.34	1.55	1.01	0.67	1.01
Tb927.11.11500	UTR	cyclin dependent kinase-binding protein, putative	Cell.cycle	0.99	0.82	1.88	0.95	1.64	1.39	0.82	0.95
Tb927.11.12310	UTR	CRK12 cdc2- like protein kinase	Cell.cycle	1.34	0.65	2.09	1.92	3.48	1.89	0.65	1.89
Tb927.11.12410	UTR	KKT10, CLK1 protein kinase,	Cell.cycle	1.93	1.77	2.91	0.71	1.41	3.37	1.77	0.71
Tb927.11.12420	UTR	KKT19 Kinetochore protein, CLK2 protein kinase,	Cell.cycle	1.51	1.77	2.84	1.21	2.84	2.45	1.51	1.21
Tb927.11.12480	UTR	Kinetochore-interacting phosphatase	Cell.cycle	0.63	0.32	0.97	0.73	0.43	0.91	0.32	0.43
Tb927.11.14080	UTR	CYC2, G1 cyclin	Cell.cycle	0.92	1.33	1.2	1.02	2.61	3.4	0.92	1.02
Tb927.11.14370	UTR	MAP103	Cell.cycle	1.17	0.54	0.89	0.85	0.98	0.56	0.54	0.56
Tb927.11.16390	UTR	(CKS1 cyclin dependent kinases regulatory subunit, putative	Cell.cycle	2.54	1.54	0.95	1.55	1.43	1.12	0.95	1.12
Tb927.11.16720	UTR	CYC6 mitotic cyclin	Cell.cycle	2.34	1.98	3.27	0.86	1.89	3.12	1.98	0.86
Tb927.11.6550	UTR	PUF nine target 1 (PNT1)	Cell.cycle	1.06	0.52	0.7	1.41	1.65	0.89	0.52	0.89
Tb927.4.5110	UTR	KKT8 Kinetochore protein	Cell.cycle	1.63	0.47	0.39	1.01	0.8	0.3	0.39	0.3
Tb927.6.1210	UTR	KKT6 kinetochore protein	Cell.cycle	1.1	0.8	1.1	1.15	0.79	0.96	0.8	0.79
Tb927.7.1590	UTR	mitotic cyclin,cyclin CycB3 (CYC8)	Cell.cycle	2.41	2.37	4.09	1.68	4.93	4.44	2.37	1.68
Tb927.7.4860	UTR	KKT13 Kinetochore protein	Cell.cycle	2	1.17	1.91	1.77	3.94	1.59	1.17	1.59
Tb927.7.5570	UTR	cell cycle associated protein MOB1-A	Cell.cycle	0.77	0.9	1.64	1.32	2.28	2.15	0.77	1.32
Tb927.7.6630	UTR	KKIP5 Kinetochore interacting protein 5	Cell.cycle	1.53	0.65	2.18	1.76	3.71	1.82	0.65	1.76
Tb927.8.3680	UTR	KKT4 kinetochore protein	Cell.cycle	1.3	0.4	1.04	0.81	0.63	0.71	0.4	0.63
Tb927.8.6340	UTR	CYC10, CYC2-like cyclin	Cell.cycle	1.5	1.73	10.79	1.15	2	9.1	1.5	1.15
Tb927.8.6350	UTR	CYC11, CYC2-like cyclin	Cell.cycle	1.49	0.97	9.47	1.8	3.61	5.49	0.97	1.8
Tb927.8.6500	UTR	cell division cycle protein, putative	Cell.cycle	1.64	0.6	1	1.25	1.26	0.81	0.6	0.81
Tb927.1.3200	UTR	SGT1-like protein, cold-shock domain	Chaperone	1.87	0.39	0.32	1.35	0.32	0.24	0.32	0.24
Tb927.1.4300	UTR	chaperone DNAj, putative, J17	Chaperone	1.64	1.45	3.4	1.6	3.65	2.71	1.45	1.6
Tb927.10.1060	UTR	Tric complex delta subunit (TCP-1-delta)	Chaperone	1.03	0.34	0.22	0.91	0.29	0.17	0.22	0.17
Tb927.10.10920	UTR	heat shock protein 83, HSP83	Chaperone	1.58	1.03	0.84	0.9	2.38	1.49	0.84	0.9
Tb927.10.12640	UTR	chaperone DNAj, putative, J37	Chaperone	1.5	1.07	1.58	1.09	1.25	1.64	1.07	1.09
Tb927.10.12710	UTR	heat shock protein, HSP110	Chaperone	0.81	0.19	0.23	1.24	0.45	0.21	0.19	0.21
Tb927.10.13830	UTR	chaperone DNAj, putative, J23	Chaperone	1.45	0.5	0.79	1.18	0.59	0.75	0.5	0.59
Tb927.10.15600	UTR	FKBP-type peptidyl-prolyl cis-trans isomerase, conserved	Chaperone	1.24	0.89	1.43	1.35	2.04	1.08	0.89	1.08
Tb927.10.2290	UTR	chaperone protein DNAj, endoplasmatic reticulum J3	Chaperone	1.17	0.39	0.58	1	0.92	0.55	0.39	0.55
Tb927.10.2620	UTR	ACDP23B HSP20 cold-shock domain (p23-like)	Chaperone	0.96	0.53	0.43	1.35	0.54	0.43	0.43	0.43
Tb927.10.4900	UTR	TPR-repeat-containing chaperone protein DNAJ, putative,TPR repeat protein	Chaperone	1.58	0.6	0.62	1.52	0.59	0.63	0.6	0.59
Tb927.10.5180	UTR	TPR-repeat-containing chaperone protein DNAJ, putative	Chaperone	1	0.69	1.76	1.79	1.82	1.41	0.69	1.41
Tb927.10.8190	UTR	Tric complex theta subunit (TCP-1-theta)	Chaperone	0.76	0.37	0.32	0.85	0.69	0.27	0.32	0.27
Tb927.10.8230	UTR	protein disulfide isomerase,ERp57-like, cofactor wth calnexin, putative	Chaperone	1.03	0.44	0.15	0.57	0.2	0.1	0.15	0.1
Tb927.10.8540	UTR	chaperone DNAj, putative, J6	Chaperone	1.05	0.35	0.69	1.29	0.65	0.88	0.35	0.65
Tb927.11.1010	UTR	chaperone DNAj, putative, J18	Chaperone	1.52	1.38	1.66	1.31	1.56	1.58	1.38	1.31
Tb927.11.12230	UTR	heat shock protein HslU2, in mitochondrion	Chaperone	1.05	0.46	0.46	1.75	1.26	0.58	0.46	0.58
Tb927.11.16740	UTR	chaperone DNAj, putative, J45	Chaperone	0.75	0.23	0.44	1.19	0.49	0.42	0.23	0.42
Tb927.11.1900	UTR	Tric complex beta subunit (TCP-1-beta)	Chaperone	1.11	0.32	0.17	0.8	0.31	0.16	0.17	0.16
Tb927.11.2650	UTR	heat shock protein 84, putative, mit HSp90	Chaperone	0.8	0.33	0.34	1.2	1.77	0.67	0.33	0.67
Tb927.11.5220	UTR	chaperone DNAj, putative, J8	Chaperone	0.9	0.53	0.91	1.7	1.56	0.81	0.53	0.81
Tb927.11.5710	UTR	chaperone DNAj, putative, J29	Chaperone	1.37	2.01	2.38	1.43	3.64	2.2	1.37	1.43
Tb927.11.880	UTR	cyclophilin a,cyclophilin type peptidyl-prolyl cis-trans isomerase (CYPA)	Chaperone	1.08	0.35	0.1	1.59	0.48	0.09	0.1	0.09
Tb927.3.1760	UTR	chaperone DNAj, putative, J36	Chaperone	0.74	0.91	0.76	1.11	1.8	0.64	0.74	0.64
Tb927.3.3100	UTR	peptidyl-prolyl cis-trans isomerase NIMA-interacting 4, putative	Chaperone	1.76	2.14	0.74	1.65	1.83	0.81	0.74	0.81
Tb927.3.5340	UTR	Hsc70-interacting protein (Hip), putative	Chaperone	0.86	0.28	0.22	0.99	0.47	0.28	0.22	0.28
Tb927.4.2220	UTR	TPR-repeat-containing chaperone protein DNAJ, putative	Chaperone	1.41	2.25	4.41	1.47	3.48	3.02	1.41	1.47
Tb927.5.1520	UTR	heat shock protein HslU1, in mitochondrion	Chaperone	1.1	0.8	1.02	1.27	0.76	0.77	0.8	0.76
Tb927.6.3850	UTR	chaperone DNAj, putative, J9	Chaperone	1.63	3.82	3.45	1.14	3.07	0.96	1.63	0.96
Tb927.7.1300	UTR	protein disulfide isomerase,ERp72-like, cofactor wth calnexin, putative	Chaperone	1.1	0.42	0.22	0.8	0.33	0.16	0.22	0.16
Tb927.7.1320	UTR	10 kDa heat shock protein, putative (HSP10)	Chaperone	0.65	2.32	0.44	0.92	3.51	0.52	0.44	0.52
Tb927.7.1340	UTR	10 kDa heat shock protein, putative (HSP10)	Chaperone	0.83	2.31	0.4	1.31	1.72	0.29	0.4	0.29
Tb927.7.2590	UTR	prefoldin, putative	Chaperone	1.11	0.51	0.61	1.38	0.86	0.55	0.51	0.55
Tb927.7.570	UTR	prefoldin, putative	Chaperone	1.43	0.89	0.49	2.03	3.02	0.66	0.49	0.66
Tb927.7.5790	UTR	protein disulfide isomerase, ERp44-like	Chaperone	1.65	1.61	0.44	1.7	3.73	0.45	0.44	0.45
Tb927.7.6200	UTR	chaperone DNAj, putative, J26	Chaperone	1.53	2.38	2.05	1.09	3.12	2.62	1.53	1.09
Tb927.8.1030	UTR	chaperone DNAj, putative, J48	Chaperone	2.13	2.62	1.92	1.71	3.27	1.95	1.92	1.71
Tb927.8.3150	UTR	Tric complex gamma subunit (TCP-1-gamma)	Chaperone	0.72	0.31	0.3	0.56	0.35	0.26	0.3	0.26
[truncated: 5,370 more rows]

## Sheet: 3. Matched sets for MEME
GeneID >2	mRNA length	3UTR		GeneID <1 size matched	mRNA length	3UTR		GeneID <1 all	mRNA length	3UTR
[truncated: 2,246 more rows]

[truncated: 1 more sheets: 4. All reads RIP]
