# Supplementary material
Source: HighWire-hosted journal article supplement (doi:10.1101/rna.079258.122)
Supplement: Supplemental_Text_S1.docx [file Supplemental_Text_S1.docx]

**SUPPLEMENTS**

**Supplementary Table S1. Effect of *DRBD18* RNAi on the transcriptome of bloodstream forms**.

Analysis of data from total RNA, rRNA-depleted. For details see top sheet.

**Supplementary Table S2: Mass spectrometry results**

Affinity-purified DRBD18 from bloodstream forms. For details see top sheet.

**Supplementary Table S3: Detailed FISH results**

**Supplementary Table S4: Effect of *DRBD18* RNAi on the transcriptome of bloodstream forms**.

Re-analysis of data from Mishra et al., 2021: poly(A)+ RNA from whole cells or the cytoplasmic fraction. For details see top sheet.

**Supplementary Table S5: Comparison of different datasets**.

For details see top sheet.

**Supplementary Table S6: mRNAs associated with DRBD18 in bloodstream forms**.

For details see top sheet.

**Supplementary Table S7. Plasmids and oligonucleotides**

**Supplementary Figure S1: Effect of *DRBD18* RNAi on RBP10 protein and RNA expression in EATRO1125 bloodstream and procyclic forms; cell fractionation.**

**A.** Effect of RNAi on *RBP10* mRNA in EATRO1125 bloodstream forms. The methylene-blue-stained blot is on the left and the signal from *RBP10* mRNA is on the right. The corresponding Western blot for DRBD18 is shown in **panel B**.

**B.** Cumulative growth curves of EATRO1125 bloodstream forms with and without induction of *DRBD18* RNAi.

**C, D.** Lister 427 bloodstream-form trypanosomes were separated into nuclear and cytoplasmic fractions at various times after RNAi induction. D and E are different blots from the same experiment. The distributions of DRBD18 (panel D), RBP10 (cytoplasmic, panel D with the DRBD18 signal still visible) XRND (a soluble nuclear protein, panel E) and ribosomal protein S9 (nucleus and cytoplasm) were examined. The longest RBP10 mRNAs were no longer detectable from these fractions.

**Supplementary Figure S2: Effect of *DRBD18* RNAi on *DRBD12* mRNA.**

*DRBD18* RNAi was induced over 24h and mRNAs encoding DRBD12 and tubulin were compared, as in Figure 4.

A. Northern blot results were used to examine the effects of *DRBD18* RNAi on *DRBD12* mRNA. The methylene blue-stained membrane is shown on the left, with *DRBD12* hybridisation in the centre. The membrane was then stripped and hybridised with a beta-tubulin probe as a further control. Arrows indicate the different *DRBD12* signals.

B. DRBD18 protein levels after RNAi induction, corresponding to panel (A). Ribosomal protein S9 is the loading control.

C. Reads mapped over the *DRBD12* region of the genome, without tetracycline or after 12h tetracycline addition: one replicate is shown but two others looked similar. Since the genomics viewer (88,89) shows raw reads, the heights of the "+tet" rows have been adjusted to account for (i) different scales in the viewer and (ii) the difference in total read coverage for the two samples. This ensures that mRNAs that were not affected look approximately similar. The panel predicts a *DRBD12* mRNA of about 4 kb after 12h RNAi (orange dotted line). The low level of mapped reads over the centre of the 3'-UTR might be caused by repetitive and low-complexity sequences.

**Supplementary Figure S3. DRBD18 depletion and binding analysis**

**A.** The effect of DRBD18 RNAi in procyclic forms (y-axis, published values) was plotted against the effect of DRBD18 RNAi in bloodstream forms (x-axis)

**B.** Lack of correlation between effects of DRBD18 depletion in bloodstream forms (y-axis) and DRBD18 binding (x-axis).

**C.** Lack of correlation between mRNA length (x-axis) and RNA binding by DRBD18 (y-axis).

**D.** Correlation between the effect of DRBD18 depletion in bloodstream forms on coding sequences (y-axis) vs 3’-UTRs (x-axis)

**Supplementary Figure S4. Effects of DRBD18 depletion in procyclic forms on coding region and 3'-UTR read densities**

This is a re-analysis of data from {Mishra, 2021 #4436}. This is poly(A)+ RNA after 19h RNAi.

**A.** Results for total poly(A)+ RNA are shown, with coding region (CDS) reads on the x-axis and 3'-UTR reads on the y-axis.

**B.** Results for cytoplasmic poly(A)+ RNA are shown, with coding region (CDS) reads on the x-axis and 3'-UTR reads on the y-axis.

**C.** Results for coding regions are shown, with whole cell poly(A)+ RNA reads on the x-axis and cytoplasmic reads on the y-axis.

**D.** Results for 3'-UTRs are shown, with whole cell poly(A)+ RNA reads on the x-axis and cytoplasmic reads on the y-axis.

**E.** Effects on the 3'-UTR relative to the CDS, for bloodstream forms (y-axis) and procyclic forms (x-axis. For each mRNA, the log2 fold change after RNA for the 3'-UTR was subtracted from the log2 fold change for the CDS. The magenta box encloses mRNAs for which the difference was less than 1.5-fold. A value of -1 means that relative to the coding region, 3'-UTR reads were half as abundant as before, suggesting relative accumulation of shortened mRNAs. A value of +1 indicates a doubling of 3'-UTR reads relative to the coding region.

**F.** Effects of RNAi on mRNA location in procyclic forms: mRNAs that showed a lower cytoplasmic RNA: whole cell RNA ratio after RNAi are significantly longer than other RNAs. Results are from Supplementary Table S4. First, we used DeSeq2 to calculated the ratios of cytoplasmic RNA to whole cell RNA for the -tet and +tet conditions. This yielded ratios for which we could see mRNAs that were present at significantly higher levels in whole cell RNA than in cyctoplasmic RNA (poorly exported or short half-life in the cytoplasm) or significantly higher in cytoplasmic RNA (very well exported or longer half-life in the cytoplasm). To find the effect of RNAi we simply, for coding regions, subtracted the log2 ratio for cells without RNAi from the log2 fold ratio for cells with RNAi. If the difference amounted to a decrease of at least 1.5-fold, the RNA was classified as having possible RNAi-induced retention in the nucleus (though this could also result from increased cytoplasmic instability). Student t-test results (in cyan) are for log-transformed values.

**Supplementary Figure S5. Effects of DRBD18 depletion on processing of the Tb927.8.1580 mRNA**

All three panels are close-ups of the Integrated Genome Viewer results in Figure 6.

**A.** Region with alternative processing sites. These are forward reads from procyclic for total RNA with RNAi. Reads that span the labelled poly(A) or spliced leader addition site, or align between, are from longer (wild-type) mRNA. Note that some reads with poly(A) tails or spliced leaders will not align to the genome because the number of mismatches exceeds the threshold.

**B.** Close-up of the alternative splice site. Six mRNAs have 5'-sequences that include the spliced leader are indicated.

**C.** Close-up of the region with alternative poly(A) sites. Nine alternatively polyadenylated mRNAs are indicated.

**Supplementary Figure S6. Effects of DRBD18 depletion on mRNA processing: screen shots**

The figure shows typical results for one of the three replicates for each type of sample, displayed on the Integrated Genomics Viewer. In the maps coding regions are black, 5'-UTRs are grey, and 3'-UTRs are pale cyan. The alternative truncated mRNAs are also indicated. The direction of transcription is indicated by a magenta arrow and the scale is indicated at the top. This Figure shows results for Tb927.5.1130, Tb927.6.1510 and Tb927.7.1810.

**Supplementary Figure S7. Effects of DRBD18 depletion on mRNA processing: screen shots**

The figure shows typical results for one of the three replicates for each type of sample, displayed on the Integrated Genomics Viewer. In the maps coding regions are black, 5'-UTRs are grey, and 3'-UTRs are pale cyan. The alternative truncated mRNAs are also indicated. The direction of transcription is indicated by a magenta arrow and the scale is indicated at the top. This Figure shows results for Tb927.7.3020, Tb927.10.1500 and Tb927.6.2630.

**Supplementary Figure S8. Effects of DRBD18 depletion on mRNA processing: quantification**

For each gene,the upper two bar graph shows numbers of reads (normalised to total dataset size) that were either wild-type of alternatively processed at the different poly(A) sites, and the lower panel shows mRNAs with or without the 3'-UTR-internal splice site. Details are as in Figure 6.

**Supplementary Figure S9. Effects of DRBD18 depletion on downstream mRNAs**

Reads per million reads are shown for procyclic mRNA with (+tet) or without (-tet) RNAi. In each case the effect on the mRNA with alternatively splicing is shown at the top and theresults for the next gene downstream are shown below.
