# Supplementary material
Source: HighWire-hosted journal article supplement (doi:10.1101/rna.079258.122)
Supplement: Supplemental_Text_S2.docx [file Supplemental_Text_S2.docx]

**>Tb927.5.1130... Tb927.5.1140**

ggaggaagaaggtagaagagaaggaggagagcgggcgcgaagcaaggtaaaaagggaaataatcggaaaggagaaaagggccaactaagttaaaaagATGTGCGGAAAGGACAGCGGTGTCGAGGAGCGGAAGCTTCAGCATCCGCACCGTGTACAGCAGTTCACCGCAGGGGTTGCGCTTTCTGATATTGCAACCGCAGGTGTAGTAGGTTTCACCGCCGCCATTCCCATTTCCATTGTGGACTACAGTATCATGGCTCGCGTTGCCGGCGTGACGAACAGCAGTGGACGTGTGTTATGGGAGGGCATGAGAACACTGTTCCTGCGTCCACACCGCTTTTTCATTCCGTGTGCAGAGAACAAATGCGCTCCAGTGTTTGGTGCGTGTTTTACGGTATACAGCCTTACATTCTGCACTTCTAACCTTACGAAGAGCTATTGTGAAGCAAAAGGTTACACACCTGAGCGGTCCAATTTAATCACGGGTTTAGCCGGCGGCGCCACCAACACACTCATGACCATGTGGAAAGATAGCCTTATCCTTCGCATCCTGCCCCCAGTAGGGGGTGCATCTGCGGGTTCAGGGCGGCCTAAACCAGTGCCGTGGTTGACACGTGGCCTTTTTGTTGGCCGTGATGTCTTCACATGTTTAGCCGCTTTCACCATCACACCCATGGTGGCAACGTGGTTGACAAATTACTTCTGGAATGCCAAAGAAAATGCCAAACTCACTCAGCCGCGGCCGCTGGAGGGGAAGACGCATATTCCGCTTGCGACCGTCGACCTCGCGCAGCTCATAACGCCCACAGCACTGCAGACAGTTACAACATTTATGCACATTTTTGCCATTCGTTACCGCCAGACGTATCCCAACTTCACATTTGGTGATCTTTCAACGAGCTTGCGGGAAACGTACCTCTCTTCGTTGATTCTGCGCATTGTGCGTATTCTTCCGGCGTTTGGTGTTGGCGGCATTCTCAACCGCGAACTTCGTTCTGATCTTCAGGACCGTGTGGAAGGTCCGGCATACCACTAAagtttcatccctgtttcgtttctttcttggttgtcttttctggtattttacgttgtttccgttttcccactttgtgctctttttcttcttttcccccttttttgactttttgtttgtttgtttcctctcctgtagtcggtcctcccttttccctttacgtaggtctcaatttggctacatttacgcgggacaacttttgggttagttggttagtgctacacgcatttggtcgggagcaatttcttttctcatccctcccctttcttctcatcgcacattcgagatcttcccttttttgttttcaattatcgtttctctctcttctattctctttgtgtttgcgtttgtgcatgtgcttgtatgtctcctcaaaaacacgtaaacaaataagtaaatatatataaacgatatgtatgcagcttggtatttttgttttatcgtacgttatatgctcctcattacatgtcaaacacagaggccttcatccgtaggaatacaaaccccgcttgcacgcgctttttttatttattcgtttcttcccttctttcatttttacctcatttttgcttcttttatttttagtttacatctgcatgcctgactcaactcaactcggctcaggctcctctcaaatgttacattttttaattacaatttgtagccttaaaagttgcgaataacatgcgggagtcgtctttccttttcttcctgcatctgtatgggggaatgaataactaagagttttttgtttttgaaaagaggtgaataaaataaatgggtgagtgaagaggacacgacaaggagaaataaaaagagaagggggaggaacgaacgaatgaacgaaaaggagaggaaaggagggtgagtgagttaacaattgtgtggggaaacgcgaaaaatttgccacagattactgttatgactgtataattattcgtttggtgatggatgatcttgtgattgtataaatatacaatatatgtatatttaagtgggtaaacaaatgaataaataagtatgtatgtgtgtgtatgtgtgtgccgcttctgacataagtggtggctgtgggagtcaccattagagaaatcgcattcgatttcaaagggggcggtatttaaaaaagaaaagaaaaggggaagagggtggtagaagtatagtgaagtaaaagaaagaaacaaaagcaacagcatcgggtaacaaataagagcagtaaggacaaaatgtcgcattcgcgagtaaacaaataggaatgattgagtaagtgaatatgttcttgttttcctgttttgcatggatgaatggtgggtggcaggacgggggagggaaatttttttgttttcgtttcccttcttttctccatcacatttccccctactcgaattattgttatcattattattgttattatgttgtcattcatcacttattttgtggtgacgcatatgcgtgtgcggccatgtggtggttgtttttttttttttactgttttatgacaatcagttctcttttttctatattttgaaactgtgacattgagacaacaatacacacacacacacacacacacacacacctatatatatatatatatatgtacgttctttttctctctctctcttttcgtcctcccgatatgtttacgttttgtctctttatgttgtgtttgccgcactttcgccgtttcgtaaatcgttgcaatatatttggggtattgttactgtagttttaatgtgatgtaataaaatatgatatatttgtatatgcatatatatgtatgtatatatgtgtgtgtgtcgatattttgataattgttagctggcagccgtctaatcgtgggaatgagtgaatgagtgtgtgatgctatattggacatatctttgtaataaagatgataatagcaaaaaagtacgaggacgttattggcgtgtggttattaaagcgtttcaggaacaaggagagagtacacgcacaaaaaaaaaaaagacaataataatacttagttagggcttttaaccgagtgacgttgaagggtggaggggaatgaatgggatgatgcggagccgtcacattttatgccgtaatttggtcttggcaacaacattgcatcccaaccttttcttttctttccccttcatcttatctcatctcattttattttattttgttgttttccaacccctcccctttgggatttcatatgtatgaataaaaatttttgtgcttgtgtgcgtttgcatgtgttttcgttgaggtattgtattgtggtatgtctttcctcgattttatgcgcatgaaatttttgttgtttttcttgatgttgatcaataaatggtgagacacggagagatgaagtgcagtcgcgaatgacttcggcatgttacgttctaggatttacttctttttctcactttcatttcttcacaggtgactgctctcgggcatcgtttttgttactgccgaacagcggaatttttttttttctgattcgggtggtttcgagggtagggaagtgcgttgtgcaggtcggcgacggtgtggctgaggcgctcaagacaaaacggaaagaaaaaatgataataaatgaggcaaaaatacgaagaaaaaaaagtaaaacaaaaggaagaaaatatcggcggtgcgacacgtaagtgatgcgtaagtgagtacggtgtcatctccgcatcgaaacaacgaagcgtttcttcgagtcgaacagacaatataacattccccttctaactaacctacaactaacaacttgtttatacatttttctgtttaattttttttatttttcgcccactttcatctccatttgtttttttttgtttttcaatttcttcggatgcacattcgcactaccactccagttctcactagcttaacgtcttgtaactttggaactgcctctttaggggatacatcgccgtattgcATGGCATTACGACCGTTCCCGTTGGGGAACACACCGCTGCATGCCGTCATTCGGCGTTCTGCTCGTGAATTTGAATGTGT

**>Tb927.5.3440...Tb927.5.3430**

ttgcgttgagcttagtaggagttcgtcgttacacggagagacgtgcgttgccattttatttctttttttgttttgaagaaatataattattaacaaaaaaaaactcgggcaccttttgaaacaaacatccgttggtacaATGAGACGGTTTGCACCACACCACATGCTGGTTACACGGAGTTTATGGCACTCTGCTGTCTTTTTTCGAGGACGGAGAGAAATGTTAAAACCCCTGGCGATGTCATCAGAAACTCCCGCATGTGCTGTTGAGGAAGTTGCAACACATCCTCAAGTTTCAATTAATGAAAGTATTTGCAACTCACTTGACAACCTGCTCGGTGAAACCGCTTCCCAGCGTGCTGCGGTTACGAGGGTCGGATCTCTACCATCATACTACAAACCGATGAACCTTCGTGGTGTATTGTATGAAGGCGATGTGGCACAACAACTTGCGAATGCAGCGGAGTTACGAGGTTTCCGATCGCCTGTTTGGGCTACAAATGCATCATATATACGAGGGGGTTACACGGTGCTGGAATGTGAGGTTGGGGTTGAAGTGAGCACCTCGATGTTTAACGTGGTTCTTTACAACCTGCAGCAAACGAACTCTCCGGAGGCTGATTCATGCGTTGCGCTTGCGTCGGTGAAGGCCATGCCACTCTGCGCAACGGGGCGACCCTTCTCTCGAAGACTGCGGCTGGTGCTTATGAGTCACCCCTTCTATACACGATTCAAGTCACAATATTGGGTAACTGAAGAGGAAGCTGCAGCACTTGGAACAATGGTGATGACAAGTGAGCGGGGGCGTTGTGTTCCCGTGCCCTGTCCTCCTACAGTGACTGAAATGTCTTCCTCCACAAGCCGTGATCCTCGTGTTGAGGACAGCGATACTCCTCCAGGGGAATCTGCTGTTCCTTTGATGTTGTATAATGCGGAGCAATTGGAGAACCCCAATGCAGCAAGCAGTGAGACTTGTCCTCGAGTTGAATGCGTAAATGCCAATGGGAGGCGTTATAGCACTCTCTTGACTATTCACATGCGGCGGTATTGCCAACTGCACCAGTTGTGCACAGATCCCTTTGCAACATTTGTCACATGTGCCCGTCTCCGCTCTCTTGGAGGTGATATTGTACCTGGTGCCAGTGTTCCTCTTACTTTGGTTGTGAGAGATGAATTATTGACACTTTATCATGTGGATCAAACAACGATATCTAACACGTTATTTCAGCATGCCTTGTCTGGCCAGCGGAAGTGTATGGACCGGGTTTCTGTGATTCAAGTTTAGagtttgcacttgggtgtgttatttttttttgccaccgttacatgatcatttcttgcggcaaacgttttcggatatgtcctcctttttt~~tttt~~gtcccttaatttggaatggttaggacggaaacagcatatggttataatttatcacaggtaatgtgtttgtaactttgatgtcgcaggctgtcacaatatgatacacaatttcttgtattcgtatttgtatgtgttttcgtgtttctttctttctttgttCgtgtgttaaggtggtaagttgccatgcagcatttgtgcggctcaacaattttagtttcatatttactttctttcgactgggtgttgttacctattgattatagttgttttttaattttttgctttttgttgattgcaatactactttacatactttttttttttaattatctgcatcttcttatttttgtgctatttttttttgttccgcgcttttatgtttattctgagtgatgtatttttttctgttacttctttttcactgtttattttctgtagcctgtgcgggttgtgctccttcactgaagtgggccttacgtatgcacattcttatggacatttgcacttgggtttggctatgaaggcggcttgctcttaccttatattttgatgaatctgagagcatttttttactcttggagggactatcattttatttctttgtgattagtgtgtgacgaccatttttttttgtctattatgtattttatcagtgtgcccatcttctttttctttttacatgtggtagtgttgctatcgcgataggATGCACGTTAATGTCGGACATATTGTCTTTCCCGTGCCGATACTATCGCAGGAAGCACAGACTGTTTCTGTGAAGCGTG

**>Tb927.7.1810...Tb927.7.1820**

gtaggctaggcgaggtttttcacaaaaggaatatatatatatatatataaggctacgcctaaatccctttgacctcATGGGTTGCCAACGTATGGGGACCTATCCCATTGCGGGTGTGGAAGATGTGCGCCGTGCTGTCGTTTTGGAGGTGAACGATTTTTGTATTTCCGTGAAGCTGCCTCCTGCAAGTGAATTAAGGAAAGATTCCCGGTATGGCATTAACCTTGATGCCCAGGTTGTCGGTTTCAATGCAAGGCGCGTTCGCGACGAATATGAGCTTGCCTTTCGTATGTATCTTACTGGAAACGATCTTGAGAAGTACGCCCGGAGGTGCACGGTTGGGTACCTTTTTCTTCCATCCGGGGAGGAGCATTACCTCGGCCCGCTGATATTTGGTAGTGACTCGGTGTGCTCGGCCATGCTTGTGGGGGAAGTGCCATCAAATGTAGAGGTGTGCTTTGAGTGCCTTTCTCTTCCCAGAGGTATGACGGCTCTGATGCCTGCCTGCTTTCGCCTTGCAGAGATCATGGCGACCATTCTTGATGCTGACGTGCACAATGCATCAGTGGCCTCCTCGCATATGCAAAACTTGGTGAAACTGTTCCCTTCTTATGGTGACTGCATGATGCAGTTTGATAACTGGACCAAATTTGTGGAGTGCGCGGAAGCTCAACTGGGACTGTGGTGCACAAGAAGATACACCGAAGACGAAATCAAAAAATATGGATTTCGTAATGTTGCACATTATGAGGAGCCACGTCTTGTCTCAAAACGATTTATTTACGACTATGTTGATGGGGATGTTGGGAAAGATGCGTTGCATCATGAAAAGTTTGAGGAGTTGAAGAAGCTTGTTGCCGCTGCATTGAACTCTTGCACTGACTGCCGGCGTCCTTCTCATCTGTGTAAGAAACACCTCACGGAGATATCAAGCATGCCTTGCGTTCTCCAGCTGAATCCCCCAAACTACTTGGCACCCGTGACTGCTGAGGGAATCGTCTGGAGGATTGTTCTCCAAGACCCCCTCCATCCCCTCCGTGTTGTCTGGGAACGCAAAGTCACGCGGGTTCCAGATTTTCGCTAAtcccaaatgcttccgtacggcattcattattttacaccatcatgtaagctgtcaggcagcaatagggtccttaacacaatacatttccctcctctttcgcgtttgactttcaattcctcaatgtttttggttgtcgctgttctgtttttaacattttgcatgactaatgtcttttgttcatgtttgttcgtttccctctacgtctgcttttgatgttccgttattttacttttacgtttgcttttttttctttactgtttgctccaccccgtactccttacgattggtaacatcctgattcaaatgtcggctgcaggtgataggggagcgagcttatgaagacgtggaagtactgcttctccgtcattttcccatcttttgtgtttcagctcttgtatgcgccaccgaagcacattgttagatgctacacatgtgcatgtagaaggacttccttttacgcacctttctttttcttttccataattatacttttgtgctgtctcctactgcttttcttaccttatgtattttttttactctttggttacacactcgttacttatcttttccttatatccttcctaacattatggtgctcccatggttttcctcttctttcctgtgcggtgggcccagttgctgcgtctatccactgcattgctgaccactatccactctcccgtgcacttattatgttgttttctcttttttactttactgagcgcaaccgaattgtgggggacatagtagaaggcaagaccacttgaccgccctaagtgcgATGCCTGGGCGAAGAGGGAAGCAGCGTGTGAAGCGGAAGAAGTCGAAACGTCAGAGGCCTTCCGGGATGGAGCGTGTGCTTATTGAAAGCATACACGTGCGGAAGCA

**>Tb927.7.2980...Tb927.7.2985 (=Tb927.7.3020...Tb927.7.3025)**

tgtcattttaagtaacaaagactaaccaaacaggaatattaatatatcttacaaacgttttcaccATGCGCCGGTCTGTATATCAGCTAAGCAAGGAACTCCCAATCTCTGAGGACGAGGTTGCGTGTCTGGTGAAGAAGGTGATGCGTGAATGCCCATCAGCCTTCAATTCCCAATCCTCACGTGCTGTGATCCTCTTTGGAGAGCAACACACAAAGCTATGGAACCTAACGAAGGATAAGCTAAAGGCGACAGTGAAACCCGATTCCTACAATGAGGCCGCCAAGAAGATTGATGGGTGCTTCGCCCCCGCTGCCGGTACCATATTGTTTTTGGAGGATAAAAGTGTTGTTGAAGGACTTGTCAAGTCGTACCCCGCATACGCAGAAGGTTTCCCAGTGTGGTCAACTGAATCATCAGGTATGGCTCAATTCGCCGTGTGGACAGCACTTGCAGAAAAAGGTATCGGTGCGTCTCTGCAGCACTACACATCACTGATCGGTGAGGCGGTGACGGCGGAGTGGAAGCTTCCGGCAACATGGGAGATGCATGCACAAATGCCATTTGGAAAGCCACTGGAGAAGTGTGGCGAGAAGACGTACATGCCGGATGAAGAACGCTTTAAGGTGTTTAAATAAagttcgttgatatttttaccgtacttgatcacacacatgtattcctccatggactgatcttatttacactcttggtgttattcaccctcctttaagcaccaatttctttgcaatacatgcatatacatgttggttttggggcacctttatattgttatccaactgctttttttgttcgccacgcttttccacttcttaccttttacacact**ag**gttaatttgggcaccacgtgaggttaatatgaacaaatgtatgtttctcatgttttcccttcgtttagcgaggcaaatgtattgaagaaagtgtcgtggttggggtaagtggtgttacacgcacgacgtgttcgttacccaccctttccaccctcttctcatgcttctgcacttctttacttttttgttcattcgtttatatacatatatatttacgtgttctggcttctacgatttttaaaaaacacgtatcgctataattataagcgtgtacgcacttatttttttgttatcgctctatatacatgtggtgcataatacaaggtgtctcattatcactagaggtttcttaggtaccgtaccccggtcatgtagcatgatgtagagggatgagagtcgatatgaatataataaatgatgcttgtaaggatgatttgaccaactaccgctttcgtacacgtgtgtatttttgcatgcttgtgttttatctgctttgtttattgtaacccatttaaatcatatttttttgttcacttctgttgtctttttgtcactgttgaattgttcccattgagttagctgaatttcattggtttttggagttatcacATGATGTACGTGCTTGTAGCCGTGGCCATGTTGGCAATATTCTTCGCAGCTTTAGTGCTGTTTTTACGCGGTAAGTTATCTGCTGGATCAGTTGCCACGAGCAACGGTGG

**>Tb927.8.1580... Tb927.8.1590**

attggtgggcgcctcctcccttacgaacccctagtaccgtacatatatatatatatatatatattggactacaggaggagggggaaggaattgcgcaaatacatccatcacaaaagaagacaaaagagtaagacggagacgcactcgtaATGTTACGCTGCGCTACCAGTTTTCGATGTTACATGCGCGTGATTTGCCTCACGATGGCTCCTGATGGCGCCATGACAAGTGCTTTGCGAAAATTGGACTACACGCCGTACACGCTGCGAAGCGCTTTCTCACAGGGCCGTGCCAACCGTCACCCGACTGAATGGGCTTCTGCTCTACGGGGCGAGCGGGACATTGACTTGTGCAAACTGATGGCAGATTTTGACGCTGCTGTGGGGCCTCCGGCCGCTATGTTGTATGCCAAGCTCCTGCGCGAATGCCCGGATTATACGAAAGTGATATTAGTGAAGGAGACGGACAAACAACAATGGGCGCGAGAACACGAGAGATGCGTTATATCACTTCTGAAGGGACACCGCCACCCACCCCAAAACCGTATTGCTAAGGCATTTTACACAATATTGAGCGAAATGGCACCGCACCCGATCGAACAGCCGTTGGGGGCGATTTCAGGGAATGGAGATGATGACACTCGAATTTCAGGACGCGTGGACGCGCTGGAACGTTATGAAGCTGAGGTTTGCCGGGAGGTGCCTTCCAGTCGCTTGTTGGTGTATCATCACGGCGATGGCTGGGAGCCCTTATGTAGTTTTTTGGGGAGGGAAGTCCCTGGTGAACCATTTCCGCCTTATGATGGTGGAATGCACGTAATTCGTAATCTCCATGAACGTGTCGAGCGTACTGAGAAAATAGCGTATGTAGCCGTGCTATTACTTGGTGGTACGGCATTGTATGCCTTCTTTCCAGTTTTGCTAGACATGAAGGAATATTTTGAAAAGTTGTACAGAGACTACCAGATTGCGTATGGACAGTGAtcgttcgctttccctcttgccatccccttttacaattgtttggttacacgtaagaggtagtggcttctatgcaaattggttccactccattgctgttggcatatttgtaagaatattttgagcagttggtgttctgtggttttatggaagcctgtttgtcatactccatctttgtcgttatcattatttttgttattatgcagagaccacaataccaaaatctgatagcgtgttttacacattaaatttatttcgtccttcatagctctttttttttctttttttttgtttcgtgcgtcaagtccacttgccagcctttcatatcgtaccttttgttttaccctacacttggcggtgtggcgacctaaatgggccaactttttgtgggctcgcttttgttgttgtgagtgaaaaaggtgcttacgatttttcttttttttttgttttactctccaaccatttgttctttcctcctctttttttttctattttctgcacatttttgtggggtcggtagtgttctttcgttttgtttttggttcttccttcttttaacaccggctggggtgaggcctctccacgtgtcatccattaccatttcattcaatgctactggaatgtatgaaattacaaaattgaggggtaagagagttgttaggatggatgaggcaaaggaaaaaaacgcagggggaaaagaaaacaacagcaacataaaaaaaagcgcaaatggacgatatctgctgcacatattagaggacgaagtgccacgcggttggtgcgttttgtattagttttccctgttaaatagcttctaattatttcttgattttgaagtttattgaggcgttgttattgttattgctgttgttgttattgttgttccttcggttatcattggccactatcgcttccgagatgaacaattttgaattgcctttgttggtgacctcgatgtctttccttacaccactcgaatgtggtgggcgcggtgtaaacttgactgtaaagtttcaactcttccttcatctcttgttttctgcatttttccatttccatatggacacgtttatctgtatgcatatatgtttacttatttgtgtacatcttccttccttccttccttccctcttttctttttttttcccccattcctgtttgctgtggcagagtagcagtgtgggtgcgtgaaggtttgtgcgcattgtgcagcagcagcgtagtgctcaggaggagggggggggtccagagtattttttttccccctttacaaaaaggagaaaaaagaaagtacggtgggaagaagtgaggaagaaaggttacgagacctagaaggaagaaaagagaaaggaagagaaggaggtgaaacaaaacccgaaggtgtaggtgggggaaaaaagcaaaagaaaaaaaggacaaatataaataccaatcaaggaagaaagaaataaagaggtcagtggaagtgagagaagagaggagcacaagtgggtgcaacaagagggagtgtgtaaaaagaggtttattaagcacatcagaagaaagggaaaggtcagcacgcataggtgaactgcgggagaacaggaacaaaagcaggttgaaagcagaagagggggaaggtttttcttttccttttttccccctctcaaaaaaagaggcttcacaaggttcaaagcggtcggcacaaccgaaaacgaaagaggaagataagggcgagacaaaaaactcgggggacgggtacaaaaggctggtgatcaacactggaagccgaagcttcgagtggaaagttgaagagaccaagtcattggactgtaggaaaggggcgtgacgacattgtggcattaaataccgcaggggaggggttcaattccgttggaaagtaaaagtaaagaccaaatagttttttccattatttattatttaccattggaagcagaagagagacttgaATGTTGGCAGTACGAGGGCGT

**>tb927.9.4230...Tb927.9.4250**

ccataccaaaagactgtaaagcacaaccgctctgcaacaagcactaagggaagaaagacaggtgattgtggatacggttgaacctgaagggaagggaagcaatcgggacagcagtggtgcgcgccacgtgtgtttgtgggaggaaggcttgttaaggttggcgaaatcatcttaaaagccaccattcacacccagtaagtattgtacttcataggaagcctttgcttttaagatccgatattgagaagtgggggcaccATGGGGGGATGTGTGATTTCCGTCATGGACTACATGAACAATCGCTCTGAGGTTGAGAATGAGCATGTGAAAAAATTTCGTGCGCTTGGCAAGGTTGCTGTCCCTGTGCCCGGCAGCGAAACTTCTGATTGCTCTCCCATCTACCGTCTCGTAACTGACGACGGCAAAGATATTGAAGAGGTGCGGCGGGAGTGGTACGAGGGTGAGTGCCTTCCGCAGCGCTTCGCAGCCCTTTGCAAGCGTCAACCCAAGCAGCGTGCCCTTGCCTACCGCCCAGTGGATCGGGTAGAAAAGGCTGTAATTAAGGATCTGCACACGGGAACAGAAAAGATGATGAACGTAACACATTTCAAGGAGACGAAATACCTTGACTACGGCACCTTCTGGGACTACATCGAGTCGTTTGGGCGAGGTCTCGTGGAGTTGGGTATTTCACCAAGCTCCCGAGTCGCCATATACGAGGAGACGCGGTGGGAGTGGTTGGCAACAATTTACGGTATCTGGTCGCAGAATATGGTTGCCACCACAGTGTACGCCAATCTTGGCGAAGATGCGCTCGCGTATGCCCTCCGGGAAACAGGCTGCAAGGGGATCATTTGCAATGCGAAGAATGTGAGTGTTGTTATTAAATTCATGAGTGAAGGCATCACACCTTCCGCACCCATCATCTACAATGGGAGCCTTCCTGCCTCTGTCGACCAGGAGGCCTGCCATCTCGTATCGTGGGAGGAAGTTGTGAAACTTGGTCGTGAGGCCCGTGACCGGCTTCCGTTGAACAACTCTGGAAGGGCAGATGACCTTGCTCTCATCATGTATACGAGTGGTACGACGGGGGACCCCAAAGGTGTCATTCACACACATGGCTCACTGATGTCGGGAGTTCATGCACTTGACCACAGGCTGAATGCTGTAATGGGACCGTTGCGGGATGGAGAAACTTACCTGTCTTACCTGCCTCTTGCCCACATTTTGGAGTTAGGAGTGCTAAGCGTATTCATTGCCCGCGGTGCACTGATATGCTTTGGAAGCCCCTTTACACTGACTGACCTCACTGCAAGGCCCCGTGGTGACCTAGCAGAGTACAATCCATCACTTTTAATTGGCGTACCGCGCATATACGATACGCTGAAGAAGGCAATTCAGGCGAAACTGCCGGCTCCTGGCACGTTCAAGCGTCGTGCTTTTGACCATGCCTTCCAGAGCCGCTTGCGTGCCTTTAAGGATGGCAAAGATTCGCCGTACTGGGATGCGAAGGTGTTTGCAGCTACCCGTGCCGTTTTGGGGAAGAATATGTACATGGTTTTGTCCGGCGGAGGCCCTCTGAGTACAGCCACACAAGATTTCCTCAATGTTGCAGTCGTTCGTATAATTCAAGGTTGGGGCCTCACGGAGACGGTGTGTGTCGGAGGTGTTCAACTTACAGGCGATATTGAAACCGGTGCTGTTGGACCCCCGCTGCTATCGGAGGAAGTGAAACTACTGGACGTGGAAGGATACAAACACACCGATGAGCCCGATCCTCGTGGGGAAATTCTTCTGCGTGGTCCATTCCTCTTCAAAGGGTACTACAAGCAGGAAGAACTAACCAAGGAGGCAATAGATGAGGATGGTTGGTTTCATACGGGTGACGTTGGCAGCATCGGCCCCAATGGAACCCTTCGCATCATTGGCCGCGTGAAGGCCTTGGCAAAGAATGTTCTTGGAGAGTATGTTGCCATGGAGACGTTGGAATCCATGTATGCACACAACTCGCTGAGCATGCCCAACGGTGTTTGTGTCCTCGTGCATCCTGACAGACCGTACATTTGTGCGCTTGTTCTTACTGATGAAGCGAAGGTTGTTGCGTTCACGAGGGAGCACGGATTGAAAGGTAAATACCCTGAAGTTCTGCAGGACCCCGAGTTTCAGAAGAAGGCTACAGCATCATTTCAGGAGACGGCTCGTGCATCTGATCGACAGAAGTTTGAGATTGTACGTCACGTACGCCTACTGAGTGATGAGTGGACTCCTGAAAATGGTGTGCTGACGGCCGCAGGCAAACTGAAGCGACGCGTCATCGATGAGAAGTACACTGATACTATTGTGTCACTTTTCGTGGAGGAGTGCTGAtgaatggtgtgtgtgtgtgtgtgtgtgtgtgtgtgtgtgtgtgtgtgtgtgtgtgtgtgtgtgcgtgcgtgtgtttatttattttatcatttatctttggatttctttgccttctggctttttgtggttaacatgtaagtttactgctctaatatcttacattttaagtatactttcctagtctgttttttttttgtcctggcagcattcttattcggtgcccttatggttgttaaagtttgggaagaggaataggcgaaaatcttttgttcaccgtagtcactttatattcagttgaggaaatcgtcgcatcaccacaaattctcattttttgtttaaccttgataaccccaccttgttgtcgtggtacgttaaaacatgtgttttcaatgttttgttcagggtcgttgcctttgagaggtgagcctgtacatttgttgcttgtgggcgaatgactgatgctgttgttttctatatattggcaaacaaacggtttcttctgcatgtgctgtgctcttttctattacttctactgtttggatgtgtgtgaagggttgtttcttcttttcgttgttgtttttgtctgtggcgcagtcgacaggaggggcttggtggaagccgttttgtttttttgcctgtgaaccctccgccgttttgttggtaattgttttcctttttttgtggcgtgcagtctgcccgttattataattgtgaccgaggctttgtcttaacgggcttgcaagtattagtggagtttctatttaatgcttccccccgtttgttctgtgacgatgttttgccactgtttgtaattaatttcattaacgtgagatcgtctgccttctttgtgttttcacttgcatgcggcagtgtccgtgcttatgattttgaggcgcgcaaggttgtgcatttaatgtcattcctttttttttttaaacgtcgccacctttccccgtcctgtaacgtgttgtctttctgcagggtgattagttatagctgagcagacgaccctgtttctcagctgtcaagcatcaaggcggaaggagtagaagccctttcattgaacagacacgctgcggtgggagatcattcgttcactgccatattttttgctcctatagatttaccccttcgcttgtctttgcgtgctaacgcaagcacagcgctgttgggggtgggggagcaagtagtgagaggactgcggaataataccagagaaggcgcaacagaggagcaccgggcccatcgaaaggtgacaaccccaaacgataggaATGCTTTCGACGGTTTGTGGTTCCGGAGCTGCAACTATGAACAATGGCCGGCAGAAGAAAGTTGAT

**>Tb927.9.8370...Tb927.9.8370**

aacgtgacgtccttcgaggggagattaaaattcaccaaaggagagcaaggacacaataatattaagaaaagtaagcagggtggggaggaaaaaaaaaaaagaagagtttaagcagccaccgtcacgcacttacgggggtgggaaggggctgctgacgcttgtaaactacagaaaagcagaataggacgaaggtgaagagcacaATGCAACGCAATTGGGTATTGCTGCCCCAGACAGTGCGTGCAGGAGATGCACCAAAAAGTTCTGCGGTTCGTACCCCCACAAGACCCTTGCCGTACGTTTGCTTGAAGTCTAATGACGGTATGGAGTTCGTTCTTCCTGAGGTTGCAGCGCGCCAAAGCAAAATGCTGGCCATGCTGCTAGATGCTGTTTATTCACTCCCAGAGCGTGGTGGTTTTGCGGAACCGACAAATGCGCGGGGTGAGCAACATACAACTGTACACGCCAGCAATAACATAGGCACAATGCCATGTATTCCTCTTGAAGTGCTTAGTGGCCGCATACTGGAGCTGGTTTGTCGCTATTTAGTCCAGCGCAGTACGTCAGATGTAAATTCTACCGACGAATTTGCGCTTCTGGGTGAGCTAAACCCCACTTCATCCAGTGATCAGGATATCGTTTTGGGGCTGCTGATGGCGTCGGATTACCTGGATTGTTGAtcatatttatttactcacgcgctgaatgaagtaaggagatgatggggttgttgcacacagcatccgtctctatagcgtgcccatacatgcgtgcatgctaacgacgatgccctctactcatttggcttctttttttttcttttttttttttgcgcttcgccctgttcatcacagcccttggcttttgcgagagaagtaacgggagagcaatcaaactgcgtaccatgttaggtgattgtttaggtaaagtgaaggataagatgcagaaagctgtagcaaggaggaagggaaggagcgaaggagaggactgattttatatatggttaacagttctgctactggctttcgtaccaaaatggatttttaatggattttggaaagtgccttcgaactctgtgtgtgtgtgtgtgtgtgtgtgtgtgtgtgtgtgcttgtgtcagtgtgtctgtcagcacccgagttcagcgaacccctgacaagtaaattggctcttctcgcttgcttgaccagtgtaaatggatgggatcagaccacctgttttctgcgttttatcattgaaaaagtaaatttttttaggcgcttcgccaagacactcctctattcatacgttatggtattcgctggtctcacttcctcctctagtctcgggtcattctggtcacgaacaccactgtttgtgttacgtgttgctctgatattttcttacagctttgggtttagttatatttcgtaacgggaccttgttgttgtcctctctccgtatatatgcatgtgaaactctccgtatatatgcatgtgaaacacttcatttcattcattcagaccgcattgttcatgaccgtatcaataattgaacaatgccttttgcctatatcaacaaacgttctgcacgactgcgcttattatcgctgttttttttccgtgtgcaattgatttttgtctgtttgcaagcgtggtttggtgggagcagacaacaaaattagaggttgcatctccgttgccttccattaccgggtgcttcagtggtggtgcctcattacttctaaatacataaaacatcaagcagacgaaagtaacacttcaagaagtcgaaacaaaggggaagttaaaaggggggtggggaagaatcaactgggtagaaggagaagaattgcagtgaggtcctgaaattttcatatattgttacattgttgcggaggtttcttaggtccgtgcgtagcacaaacaattagagtagtggcgggcggtaccggtgaaggactctcattcttgtagaagaaacaagagattcgatcaggggtaaATGGGGGCTGGAGCGTCGTCAGACAATGCCGCCATCAGTGCTTTGGCTAAAAGTAATACACGGGCTAAACTTCTTGTGAATGGCCACACCAGAGAGGTGTCGAGCAGAAGTTCCATCATCAGTCGAAA

**>Tb927.10.1500.. Tb927.10.1190**

ggatttttcaaacaaataaataggcactgaaggaggaaatcagtaaggcgtatagttcgtgacgatcaagacagtaggcgagatatacatttacaaaaaaggacaacaaggaataaagggaggaataactgctgaaaggagatctgacagcagtagcctttaaaaaaaaaaaaaaagacgctatcagttgagccaaagcaccgccactgacaacttcaaagggaagggggaacgataagtaacgctagaaacataaacaacagtgaaaccacacacacaaaaaaaacatattctaaaaggaaagaataacaaagtgagcttaggagtacctatctatcacttcgtttacaataaggaaggcgaacaaaacaggaacaaccctttaaaaagaagagaaagaaagataaaataagcccaaagataggttgtcgtctgaagcaccaatcaggctctgcatttcacgggATGGCTCTAAAGCTGCTTTCAGAAAAGGCCAACTCACAAGCCCTCAAGGTGTTGCTGTGCTCTTATTACGTTAAACGACCCGTAGAGGTGTCGCTATCGGGAGCATATGCAACTCCTATTTTGCACCATCCAGCCTTCAAGCAGCCCATCATTGCACCTAACGAAATGGCCCGCGTCATTTTATTTTACAGCGTTGAACCCACTAGTAATAATGGAGGGGCAGCAGATTCATCTAATGGTGACGGTACCGCCTCTCCCGTTGCCGGTTTGACAAACCTGACATTGGAGCACGAGACGTGGTTGGAGTGGGAGGCAACGACTTTTACCCGTGCTGTGCACCCGCTCTACACGCAACGACGGCAAACGGCGGAGTCTCTGGCTGTGTTTTCATATCTCGACAAAAAGATTAGTGAAAATGATGACCGCTGTGTTTACTCTCCAGCTGTTGAAGGTAAAGGGGCTGCGGATCCCACCGATGCCGTCAGCACTTTTTTCATTGACTGTATTGTATGGTGTGCTGTCCTTCCTGCTCTCTGCGAGAGCGGTGTGCTGCGGGACTCGGAGAAGCAACAGCTACCGCATCTTGTGAAGTGGTTCAATACATTTCAAAAGGAACAGAAGACGTTGATTGATAACGCCTTCGAGAACCTCTCTGTGCAGGAAGCTGCCGACTTCTTGCGGTGCCCACGTGTGTACAAGGTGTCGGCTAAGGTGGAGAAAGTATTCTTTGTCACATCACCCATTTACTACGTGAATGCAGCACCACACATTGGTCACGTGTACAGCACTTTGATTACCGACGTCATTGGGAGGTACCACCGCGTGAAGGGAGAGCGGGTGTTTGCATTGACTGGCACCGATGAACACGGGCAGAAGGTAGCCGAAGCTGCCAAGCAGAAACAGGTTTCTCCGTATGATTTTACGGCTGCTGTGGCTGGCGAGTTCAAGAAGTGTTTTGAACAGATGGATTACAGCATCGACTACTTCATTCGCACCACCAATGAGCAACACAAGGCGGTGGTTAAGGAGCTATGGACGAAGTTGGAGCAGAAAGGTGACATCTATCTCGGCCGTTATGAAGGTTGGTATTCAATCAGTGATGAGTCCTTCCTTACGCCACAGAACATCACGGACGGAGTTGACAAGGATGGCAATCCATGCAAAGTGAGCCTCGAAAGTGGGCACGTCGTAACGTGGGTCTCAGAAGAAAATTATATGTTCCGCCTGAGCGCGTTCCGCGAGAGGCTTTTGGAATGGTACCATGCCAACCCCGGTTGCATAGTGCCAGAGTTTCGCAGAAGGGAGGTAATTCGCGCGGTGGAGAAGGGCTTGCCTGACCTGAGTGTCTCCCGCAAGAAGGAAACACTGCACAACTGGGCGATACCCGTTCCAGGCAACCCAGACCACTGCGTTTATGTCTGGCTCGACGCTCTGACGAATTATTTAACTGGTTCACGTCTTCGAGTAGATGAATCCGGGAAGGAGGTGAGCCTAGCGGATGACTTTAGCGAGCTCGAGCGCTTCCCTGCTGATGTTCACGTTATTGGGAAAGACATTTTGAAGTTCCACGCAATTTACTGGCCTGCGTTCCTGCTCTCTGCTGGCCTTCCACTACCCAAGAAGATTGTCGCACATGGGTGGTGGACAAAGGATCGCAAGAAGATCAGCAAATCCCTCGGGAACGTTTTCGATCCGGTGGAGAAGGCAGAGGAGTTTGGTTACGATGCGCTTAAGTACTTCCTGCTTCGGGAGTCGGGCTTCTCCGATGATGGTGACTACAGTGACAAGAACATGATTGCCCGCCTTAATGGTGAGCTTGCTGATACGCTCGGCAATCTTGTCATGCGGTGCACTTCTGCGAAGATAAATGTTAACGGCGAGTGGCCCAGTCCTGCGGCTTACACCGAGGAGGACGAGTCCCTCATACAACTCATTAAGGATTTGCCTGGAACGGCGGATCACTACTACCTGATTCCCGACATACAGAAAGCTATCATTGCCGTTTTCGACGTGCTACGTGCCATCAACGCTTACGTCACCGACATGGCGCCATGGAAACTCGTCAAAACAGACCCGGAACGGCTCCGCACGGTGCTGTACATTACCCTGGAGGGTGTACGCGTGACGACGCTGCTCCTTTCCCCAATTCTTCCGCGGAAGTCCGTTGTTATTTTTGACATGTTGGGCGTCCCCGAGGTACATCGTAAAGGTATTGAGAACTTTGAGTTTGGTGCCGTTCCTCCTGGAACGCGTCTCGGCCCCGCAGTGGAGGGCGAGGTGCTGTTCAGCAAGCGCTCAACAGAGAATACAAAGAGTACATAAgtgtacgaatgatttctttagctagccaatagcggttctcatttcctcttacttattttctcttcatcatcttccgtcacagccgcctcattcgtgctccagcgcacgctattcgctgttcaacctatttttttctccccacgtctcagtgaaactttaaaaattttcctgggggaaaccccgtatgcttttctttttgtgtgtgtttttgattgatcgcctcggttccgtttggcttcgagttctcctaaaatcatcacttttccttcttttatgattcacaattgtgttgttgtagttttgtagttttcgcccttttttttcgaaaatgactcagagctgtccgtgaaatggccgctgcgccccgatggtaacatcgtgcaggtgagggacatatgagcaggtgcaagaataataattggtagtatttaaattgacaaacgccggtaacgcagtgggctgcttaaacaaaacgcgaaagggggtgctggagagagagtagcgttggggagagttgatatatgtgcacctgggcgggtattcctttactttatttgtttgttcactcatttcttgagaagctgttgtattaccacacttcgtaacttcccagtgggtatctgaggttaatctgaaggggaatcatctttagcgtttctgtgggggctttcccgttacttccatttctttatcccgttacttccatttctttattttttccttcttttattttctacgcctgtgtctgggcaccccagttcccggggaggcctggatcaagcttgtctgtgtatcacaggtcctgcattttcttttcccttacctcccttaataatctcccttctctctcctgcatttcctcctgtgttgttaacttttgtatataaagcaatagtaaagggggaaagtgtgttaacgttgcacctttccttgaaagcagctgttatatatttgtagttgtagttgttgccgtcgctttttttttttaaagaaaaaaaatagcaattttttctttggaggtgttgttagtcgtagttgttgtctgggcgtgcgtgtgttagttaggtggaacagacgggggaagcacaaATGAGGAAAGCTGGAGCAAATCGCAATAATG

**>Tb927.11.2500...Tb927.11.2490**

ttcaagcattagtttttgttgtactgccatacgttttcatagtggcaataatcaaattagcaaccgtggtgaagactgagagcgaaagaagaaataccttacaaagaaaacgaagaacgaactttcccccttttctgagggaatcgtatttgaccggtaaccaacacaagtaaaataaagaatacaaaagatacggtcgcttgagaacATGAAGGCATACAAAGAGCTCGAGCGCGTCTTCACTAAACTATACCGCTATGAGCACTTCATGAACCTTGCTGGTTGGGATATGCAAGCCATCATGCCCCCCAATGCAATGGAAGCACGTGGTGCAGCAATTGCGGAATTGGAAGTGCTCATGCACGGAGAGATTACCAACCCCAAAGTGAAGACATTCATTGAGGAAGCGGAGGGCTCTGTGGGGGAACTTAATGAACTTCAACGGGCCAATTTGCGAGAAATCCGCCGAAGTTGGGAGAAGGTCAATCGCCTTCCTGAGGCATTTGTGGAACGTAAGGCCCTCCTAACGTCCAACTCACAACAACTGTGGAAGAAGTGCCGGGAGGAAAATGATTTCGCTGGGTTTCTTCCCACGTTTAAAGAACTCGTCGAGCTGTATCGTGAGGAGGGAAAGCTTCTTGCAGGAACCACCGGCGTGCACCCGTACGAGGCCCTTGTTGACGTCTATGAACCTGGCATGACGCTTAAGCAACTGGACATAATATTCGAAAATGTGAAGTCATGGCTACCCAACCTCTTGAAAGAAGTTTTGGAGAAGCAGAAATCACTTAACGCATCTATTGTGCAACCCAAGGGACCATTCCCTATTGCCAAGCAAGAAACTCTCGGACGTGCGTGCATGAAGTTGTGGAAGTTTAACTTTGATGGCGGCCGACTGGACGTAAGCGCTCACCCATTTTGTGGTAACGTCAAGGAGGATGTGCGCATTACGACCAGCTACAATGAAAACGATTTCGCCAAAAGCCTCTTTGGTGTCATCCACGAAACTGGGCACGCAAAGTACGAACAAAATTTGGGTCCTGTCGAGTTCACCACCCAACCTGTGTGTAGGGCCCGTTCTCTAGGGGTACACGAAAGCCAATCGCTCTTTGCGGAAATGCAAATTGGACTCTCGGGTGCCTTTATGAACGCGCTTTCCCCCATGCTCGTGGAGCACTTTGGCGAGCAACCCGCCTTCACTCCAACAAACATGAAGAGAGTGTTGCAGCAGGTGCAACCAAGCCTTATTCGCATTGAGGCCGATGAGCTCTGCTACCCCCTGCACGTCATCTTGCGTTGTGAGATCGAGCGTGACTTAATCGACCGTAAAATCGAAGCAGAGGATGTTCCTCGTGCATGGAATGAGAAGATGAAGGCCTATTTTGGTCTTGAAACCCTCGGTAATGACAAGGAGGGTTGCTTGCAGGATATTCACTGGTTTGGTGGGGCATTTGGTTACTTCCCCACTTACCTCCTGGGTGCCATGCTTGCGGCGCAGCTGATGCATACCGTACGGCGGGAGCTCGGGGAAAACGTTGTGGAAGACTGCCTCATGAAAGCAGACCTCGACGTAATCTTTGCGAAGCAGAAGGAGAAGATCTGGCGTCATGGAAGTTCTCTCTTAACAGAAGAACTCATCAAGCAAGCCACCGGCGAACCGCTCAATCCGCAATACCACCGGGAGCACTTGGAGCGTCGCTACCGTGACGATGCCAACTGAaaaaaaaaaaccggtcgttacccctttccattctgtatgaatggttggtcatcttgatctatctttttttttacgtttttttttccagcgttccttgttgttcttttttcttttttctctttcctacgctgtcatttatattacggagttctgttatcgccacattttccccttttgtgtttttttcctatattattttatagggaaagggaaacatatatatatatatttattttaaaggttataattgaccaaacttctttggcctctcataacaactgaacgactgcgccgccgtatttatcatttgcgcggctggaaaaaatgcggatctctggtgcaaagtagggaatgttttaggagcgaatttacatttaaaaaaataataaaggaagagaagtacaaaccaaaccctgcctttgccatgggttttctttacaatgtcctccctttctcctttctctttttttattatatgcatatgcatacatatgttatgttgctacttcttttgctatgttttttttaatcttctatttaaatattaatgtggttactttaatgaataatatacctctatctgatgttcgcgatgcacggagttgtgtgttttactcctcttcagaactataaatgttattgaatgtaccgaatttttctcatcctttgctttctgatgctttcctttccttttatccttacccttcctccactttccacgcacatataacgtcaacaatgctcgtattcgtatgtttcactcatacattcgcatacgcagagcattagcagaagtagcttattactaacgcgtctgctggaaaggagggaccacatttttgttgaagaattggccgacgtggaattgagagttgcttttctttttttttttttcaaaaaaaaacaaagagcattcatcacgtcagtagcgccaacaaagaaaaagcattcatcacgtcagtagcgccaacaaagaaaaagcaaggaagaaaaaaataatcaaggctttctggagagtagtccaaacgaggtgtgaacaagaaaggtagacgaaaaacctgagtaaagagaggaaacacatacaggcaaaaggggagaaaagttctctcaccaaaaaggaacggcaacaacgacggaaaggacgaggaaagttgctattgttaggtggaaggtgcggatatttcccgtgctgaagtgttacagccttcatcggacccaactatcacaggctggacttgcacgttctctctctctctctaagtacgcacctcacggtgaattactttgtgatttcagttcgtgtaccgccaagtaccttaaaggagggttactaatagaacataagcgagggataacgaaaaagaacaagaagttgagtggccgaaggttacagaaattaccatcaaaagggtgcagatatagattttgggggttgttctatctttattgaagaaacccctcgtccttctttccttaccacaccctccttcgttttgattcgttgcgacgcatatattcgtattgggATGTCGAAGCCACGCGATGCGGAGGAGGGGCATGTGACCGTTTGCGTGCGTGCCCGAC

**>Tb927.11.5450...Tb927.11.5460**

aattgttataaaaaacaagataaggacgtgttgacgagtacaaacaaaaaaggaggaaactaaggttacttaagcaagtcatactctgctttgaagaaaaatcaggtaacaggtgcgATGTTGGGTCGTTCGTTTAAACTTTGTGTTTCCACAAACGCCCGTGGGATCGATTTTCTCCGCAACCGTTTCACCAATAAGTCAACCGCGTTCACACGGAAGGAACGAGAACACCTCGGTGTTGTTGGGCTACTTCCACCCGCGGAGGAGACACTTGACGACCATGTCAAGCGCTGCTGGACACAATTGACCCATTTGGAGTACCCAATCAACAAATACCAACTCTTACAGGGAATTCTCAGCACTAATACTGTTCTTTATTACAAGATTGTGGAAACCTACATGAAGGAAACACTTCCAATTATTTACACACCTACAGTGGGAGAGGCTTGTCAAAAATACGGAAACATCTTTCAAAGAGACCATGGACTCTACATAAGCATGAAGGAACGTGGGGTGATCCGGCAGACCCTTGAAAACCTTCGGAAACCTGAGGTTGAAGTTATTGTAATAACTGATGGTTCTCGCATCTTGGGTCTTGGTGACCTCGGAGCAAACGGTATGGGCATCAGCATTGGCAAATGTTCACTATACGTTGCCGCCGGTGGAATTAACCCGAGCCGCATCCTACCAGTTATGATGGACGTGGGGACAGATAATGAAGGACTTCGTGCGGATCCTCAATATCTTGGTTTGCGCCAAAAACGCCCCTCTGACGAGGATTTCTACGCTTTGTTGGATGAGTTCATGGAGGCTGCGAGTGAAGCATGGCCGGAAGCCGTTATACAATTTGAGGACTTCAGCAACAACCATTGTTTTGATATGCTTGAGCGGTACCAAAACAAGTATCGATGCTTCAATGATGATATTCAGGGAACTGGTGCTGTAATTGCTGCAGGCTTCCTAAATGCGATCGAGGCAAGCGGCATTCCTGCAGAGGATCATCGAATAGTGTTTTTTGGCGCTGGTTCCGCTGCGACAGGTGTGGCCACCTGCATTGTTGACTTGGTTGCCGCAAAGTACAAAAAGACGTTCGCAGAAGTGCAGAATAACGTATATCTTCTTGATACCAAGGGTGTCATAACAACCACGCGTGGCGACAAGTTGGCACCACACAAGGTCCCGTGGGCCCGCACTGATATTTCAGCCGAGCAGAGCAAGTCGCTTTCCACATTGGTGGATGCTGTGAAGTTTGTAAAACCAACAGCGCTGATCGGCCTTGGAGCCCAAGGTGGTGTTTTCACTGAGGATATTCTAAAGTTTATGCGATCATACTGCGAGAAGCCTGTGATTTTTGCACTTTCCAACCCCTCAAGCAAAGTGGAGGTTACTCCAGACAACGCCTTCAAGTGGACCGATGGTAAGGCAATTGTCGCAACTGGCAGTCCCTTCCCGCCCACAACTCTGAACGGCAAGAAATATGAGGCATCCCAAGGTAACAATTTGTATGTTTTCCCCGGTATTGGACTTGGTTGTGCCATCGCGCAGCCGAAAAATATCCCACAGGAGGTACTCCAAACAGCGGCCGTCACCCTCAGTAAGTTAGTGGATCGTAATGTCATGGCTTCTGAGGGAGCACTGTATCCATGTATTGATGAAGTGCGTGAAGTGTCGAAACAGGTGGCAGCTGCTGTGATTGAAAAGTTGCAAGAGATGGGTTTGGCAAAGGAGGGGTTGCCCACAAGCAAAGGGGAACGATTGAAATTGGTGGAGGAACGGATGTGGACACCCAAATATCTTGAACCGGAATATTACCTGTCGAAGAAGCTGGAGTAAagccgagggcctctgtcgtttaactcattggtgttgcatattctcttttatttttctttcttatcttttttcttcgacctccgtgctttattatgtttccgttgttgtgatagttttttttgttatttatttgaatgtgagccaatgtaagacacgcggtgatctttcacatggtgactgtttgtttcttctcacttcatttttatccgacatttctttcgataatttgcgtcgattgatccgtctgtttgcttccaaacacaaaactaatggttagtaacaataatagcaatagtgacagacacaaagaggggagggagcgttttcaaggggggctggggtgaattgaacaggtaggagggagaatgtggggaatacgataggcggatattacattgatttgttcaaccgccaagcaatagatttactttttattactattattgttttattactataccaatatctttttccccccatatctacaatacaattccttggtggacatcgattcccacaataaagtatgcacacgccaccgcattttcttttgtttcgcaacgactgtgttcacgtgcgaagttagttccgcaccccttcctgcacgtacacactaacacgcacacacacacacacacacatatatattcgcatacatgcaagggatcacacttatagtttacctcgcaactcgtctgtttttgtcacttacgtaccaactgggagcagcgatgaggagtgctttgcataggtgtttgcgtagagaaaaaaaaaacgtatgtgcctaggtgtgcacgcttacgtaaaaagcaatgttatacgtaaatgtggctgccgttttctttacaattattttccatgtttttatcccgttgattgtcacatgcgaatagcacattttttttcgttcgtagcgggtgaataccgcaacgagtgagaggtaggagttggcactcggaatatcgcgtcgcaatggggtcaagtaatgaattatgagaggaaaagaattgtactgccgtaattttagttggattcagtttagctatcaaatgtgtcaaatgcttcgctgtcttcactgctcccttgcatgcactaaaaaaaattttgtgacctgctatacaaccacctgtttgagtctccgcacaaccacatatcaagaatttgttctgttacctgtcgtagtttttaggggtgatttgttccaggggaaagttaaATGACAAATTCCCCAGATGACGATGTGGACGACAATATGTTCGAGT

**>tb927.11.13940...Tb927.11.13950**

aagggagaaaacttcgcaactactttaaggaagagttggaagtcggcttcagctgactctaacggctgcatacttgccctggcgccttcatcgattgaaaagaaagtagaaaggacgcggaaaggaggcgagacttggagaggaagaggaaaaaaaaaagaaaaccacatttttcgtttgtttagtcccgtaaacttaaactgttatcaccATGTCCACTGACCGTTCATCTCGTCGCAAGGAAATGGACTTCATGAAACTCATGAATGGTCCGCGAAAGGTGCACCCATCGGACTCCGTCTCCGAGTTTTGGGTGGAGTTTTGTGGTCCTGAGGGAACTCCATACGAAGATGGCGTATGGTACATCCACGTGCAACTTCCCGCAGAGTATCCCTTCAAATCTCCATCCATCGGTTTTAGCAATCGTATTTTCCATCCAAATGTGGATGAGTCGAGCGGTTCTGTTTGCCTCGATGTAATTAACCAAACATGGACACCGATGTATGAACTTCACAACATTTTTGATGTGTTCCTCCCGCAGCTGCTACGGTACCCTAATGCCTCTGATCCCTTAAACTCTGCGGCTGCAAGTAAGTTAATTCACGACCCTATTGGCTACGTTACATTTGTGCAAGATCACGTAGCGGAGTATGCAACACGGAGGGTTGCACTGCAAAGTATTCCTTCAGGTTTCCGGCCTCAGGGTAACGGCGCGTCCTCAGCAGCGGAGGTTAAAAATAACATATCCAGTGAGGAGGATTCCACCGCTACTCCTAAAGGACTGACAGAAATCACAACTCCGCATGTTGTAAGTGAAGGAGGGGAGGAAGAGGAGTATGAACCTGACGCAATTGACATCTAAgcagtgggggatatatttatatatttctatatttctatatttgtatatgtgagagaacgtatgaaagttgagggaagcggagggagcgaagggaggggaggaaaagaaaaaaaaaagaagagcaaaacaaggataaggggggaatcgcttttctttttcttttttgtgttttatttatttatttttccagatgaccatacagacatcacatctacccggagtgaagttagaattcagtgaagataaacccttatgcaatttcctctataggtggatgcatatgcataagagaatatatacgcgtacatctatgtatcggctaattagcgcagtcaccccgtcaaaggggaataaagaaaagtgaaaggaaagatgtgaggaaaaagttaagcaagggagataaagtattagacaaataaaggagaagggggaggtggaaaagaaaaaaaaacaaaggaagtggaatatttgtcggtcgaagtgctttcttttgcctctttttttttgtgtgttatttagggaaactcgcagccacactcatttcttagttgcatggtcctttgtatgtacacatattttttaacagcactcgaatgccatgttcaacttgcttttttttcttctctccttgcctatttcacactttcattgtttttgttctcgtctgtttgtttgactgtttctgattgcttttgatgcgtcgttgtcgccaatcagcactatttctctatgccttttttctttctttctttctctttctctttctctttcttatattccgtttcttttctgtttgcttgttgttttttcctcaagttattgttgctgttccagttcttcacctaacttcccttcttcactcttgtttttgttaggaactcgagtctttttttttcttgacattatgtgatgctttccccctctcgttttttttgtgaagtatctcatcattctcagttcttctttttttcttttttttattcctccccatttatttaatttgtttgcgtttttagttttagtttcggtttttttcctttcttttttttctttttttctttttttctttttactgttgtttgtttatactccttctcttggtctttgttattattgttcaagttgggacctgcgtgccactctacacgttggggcactgcctttagcgcctcccggcacgttatatacagatttttttaaaaatttcgtgtgtgtttaaagaacagaaaagaaagaaaaaaggcggagggagaggggatagacgcctttaagttcccccctccccccgcaaaaaaaaaaaggaaaaagggaaaaagaaaaaaaagaaaaaggaaaaaaaaaggaaaagttaacaaaatgttaaaaaaaaaagtgaaatcgaaatttgatgtgtttatcagtatgcagagggagggaaaaagtggagaaaccgaagggaaaataaggatccacacacacatatatatatatataaatatataaatatataaatatataaaaatatatttgtttgtttgtttgtgtcgggcataagagaaggggacggaatggaaaagaaagaggagtatcgtttttttaaatttatgatcccattgtttttttttcatattattttccctcttttcctccgtttcttcgttactttcctttccactccttcgtgttagtgtggaatattgttcagaactccaatgatccactttctcgttttctttcgttctccgagcaaaattatcccccctccccattttttttttcacttcaccacagattccagtctaaactctttcacctgtggctggatgctttccaatttatacggttgtgctttgctttgctttttttctttatttgagtggcgtctcgatgcttatcttttttttttatctgatatgcaacccattctctttttctatcctctctttgcgataccattccacttgacagagtacaatacattttgtggcaccagggtaattaaataccccaaggaaaggaggaaaaagaattaatgcattgaaaggaccattgtgtgcgctgtgctcggttgcgagatgaaagttttctttttttcttttttttttaaaaatgctgcagccgctagcaacaagtgatgggatgcgggtgactccccgaaagcatcacatctcggtaaagcaaccactccggaattatatggaaaaaaaatatataaatatatatatgtgtgcgcgcttgtgtacacgtgcccttcgtagttaaaaatatatggacagcaacttcatgtgtatgcgtgccgtgcagggggaaaaagtcgtacaacgttccggagtgttatgttgtcgtgtttcaaaattaataattggcgtgttgcgattcggtaacttcattcggaaattatgataccaggcgtttttttttctctgttgtgaggagaggtggtcttctctattgctgctttcctgatggctctagtcgtctgcatggtgggatttcatttctcgttaagcgacattgttgtgtgatagtctcatgctgctctccactctcagctgttatatggtgttttacaggattctcttctgtcacatctcaggcatcgaattttgggttagtttaattgttcttttttgtgatctcgagaagtatcacatttgaggggcgtccagtaggaggaggtgttgcctgttggaggcgaaaggttcttattgcaaaatggaaatttattgcagttcgtcggtggaaatgcggtgaatcttgaagaggaaaaatttgtattgccctttctttttttctttttttttttgaaaaatgctcgcgtttgcgctggatgatatgggcttcttggttcctggttcttggtgctgtcgatgtttgtttttgttgtttagttgggggtgactgaccgttccggtatccgacttcaatttacttcgttgtgagctgcacactcagcaactgttttgactcctcccttccatttcagcatctgtacacatacagtttccctcctctttatctgatttaaacggaccggtggaaacgctgaataacaaagtgtggagagtaggctattacttgcggccttagtttaccatcgaaacATGCATTCGTCACCAGCGACGAGTCAAGATGGTTTCTTGTTGGACTTTAGTTTGTACCGTGTCG

>Tb927.6.2830... Tb927.6.2840

Gcccacaaaaattttattattcattttccgcactatcaagtcgtggaatcagttactgtag

ATGCTCCAACGCGGTTTGGAAGCGGTGCTGCGCCAGTTTACAGCTGCTGATGAACGAGGTGCAGACAACACAAAGAACAAAGTGAGTGTTGAATGTTTGCAGGCACGCAGCAGTGAGGTTCGTAACTGTGAGAGTACAACAGATACAGCAGAAAAGAAGTCAAAGGCGCATCACGAGGAGGAATCCAGATATGACGAGGAATTCGTGCGAGATATATTGTCACGTGACCCCGTCCCCATCGATGAACTGCGCGGTTTAAGTCGAAGTGGTTGTCCCGCTGGTTTTCGTTACGAGGTGTGGTGTTACTTGACTGGGCACCTTCAACCATCGAGCCTGAACCGTGCTGCAGTTCTTACGCGTAAGCGACAGGAATATGTGGGATACATGCAAAGCAGTTACGGGTCTACTGACTGGGATGCTGCTTTTGCAGCAGTGGGAGATTCGGTAGGTAATGCGCCTGGCGGGGAATCTGGCAGTGGTGGTTCATCTCTCTGGCCTTCCTTTCGCAGTGGGGCTTCCGGTTTCGGTTCTTCTTCCTTGAACACTCCCAGTGACTCGGAGCTTTCAATATTGAAACAAATTCGAAAGGATATTCCGCGTATGGCAGCTGGTTTGGCATTTCTTAGCAACAGGCGAGTAATGTTGTCTGTGGAACGCTGCTTGTACATATGGGCACTACGTCATCCCGCCTGCGGTTATGTGCAAGGAATGGATGATTTTACAATTCCGTTTATTAGTGTTGTACTGGCAAATAGGGTTTGTAGGACAAAGACAGTGGCAGATCTCTACACACTTGATCCCGAGGAGGTGGGTGCGCTACTTTCTGTGGAGGTGATTAGTGACGAGGAATGGGTGAGTACCATTGAAGCGGATACATATTGGATGGTTTCCTACTTCCTAAGCGCTATTCAAGAGAACTATACGTACGACCAGCGCGGTTTGCATAGCATGGTGGAGAAACTGGAAGCTGTTGTTCGAGCAGTAAATGTGAAACTTTATAACCACCTCAGGAATGATCTGCAAATTGACTTTAAGCAGTTTTCATTTAGGTGGATGAATTGCCTACTTTTGCGTGAGCTTAATGCTACACAAGTACTACGCTTGTGGGATGCATATCTCGCTGATGAGGAAAAGGATTGGTGCACCACTCATGTTTACACATGCGCCGCATTTCTGCAATGGTGGTCAGCTGCGCTTCTACAGGAAAATGATTATTGCGTTGCAATAAAGTTTTTGCAAAATCTTCCTTCCAATGAACTGAGTGACCGCGATATCAGCGCAATTGTTTCGCAGGGAATAGTCATGCAAAAATTGTACAATAGCGCCCTTGCACATCTCGCGCAGTAGcaaatgagttgattgttttaaaaataaaaataaaacaaagcgagggatttgaaaagaggaatgctgaatttacggctcatgatgaaatgaaatgaaactgggtgattgagtgtaaaatggcgaaagttaaggggggacgaggagaatttatatagtgttgtaaccttttcaatgcaatgcattcaagtaagatgttgggtttccaacgactacgacgatgcgaaagccagtagatggggtgcatgaaatagaaaaattaatgaaccaactttttgtttctattttcctctcctctcctctcttgtttctttttttttttgctctgctgttacccttatttgaggtattttcttttgatatctttttgattttcctttcgtccctttaattttatccagttattccgaacttgcgcatcgttttgcttcatttcacttaaccgtacttttttcatctacttttgtggatgcatttcttttttttgttattgttgcagttccaccacatccccgtctcccatttcatctatgttttttttccatttttttttctaccttttaaccccgtctggtattacactccagatgctactatgctccattggtcattatgatatattggcccttgttgttgctacagttgccgttgtttctgtttttattcattgtgaccggcagcatcatcgagtttatgaaatgcaaatgtatcttatgtgcttttactctttgtttgttagcggttcaggtgcttgttcaaatacaaaaaaaataaataaggaaaaatatatcttttattctatcaagggaaatttgtcgttctcttgaaggtgtttacgtctgttgctcacataaaaagttttatgacttgctgtcggatggtgaaggtctttgattcagtggtcctgtcgtgtgttttttttttttgcttatcgttgttgcaactgcttattcgtactttgtggcggtcaacgcggtaaggcgatctgaaacctcttcaaaagaaaaggtaaaagaaggggaagatgttaagggaaagggggaaagttttccgcacgcacgtttgtgatgtaatgtttcatttattaatttttctttgttatatatttcctcctctctttctttttacttctttgtgttggcacgacagtgtgaggatgataataacaccattagagttaacaataatacgacttttggggtgcctctccgatgtgtgtaataatattcattcttcataatgtgcgtcaaatatgctttagtgatatgttgcttttctatttatacttttatttctctttacaattggacatagacacaataatattaccgaattccgttacattccacagtataagtggtgacggggagaggtggtgcagttgt
