# Supplementary material
Source: HighWire-hosted journal article supplement (doi:10.1101/rna.079258.122)
Supplement: Supplemental_Text_S3.docx [file Supplemental_Text_S3.docx]

**Different bases are in different colours. HIghlights are Poly(A) site; splice acceptor site; nearest polypyrimidine tract to splice acceptor (at least 9 pyrimidines, 1 interruption allowed); additional polypyrimidine tract (uninterrupted); weak polypyrimidine tract (2 interruptions).**

**>Tb927.5.1130 alt -21.38**

**GCAUACCACUAAaguuucaucccuguuucguuucuuucuugguugucuuuucugguauuuuacguuguuuccguuuucccacuuugugcucuuuuucuucuuuucccccuuuuuugacuuuuuguuuguuuguuuccucuccuguAgucgguccucccuuuucccuuuacguaggucucaauuuggcuacauuuacgc**

**>Tb927.5.1140 -36.64**

**CggugucaucuccgcaucgaaacaacgaagcguuucuucgagucgaacagacaauauaacauuccccuucuaacuaaccuacaacuaacaacuuguuuauacauuuuucuguuuaauuuuuuuuauuuuucgcccacuuucaucuccauuuguuuuuuuuuguuuuucaauuucuucggaugcacauucgcacuaccacuccAguucucacuagcuuaacgucuuguaacuuuggaacugccucuuuaggggau**

**Tb927.5.3440alt -48.05**

**auuuggaaugguuaggacggaaacagcauaugguuauaauuuaucacagguaauguguuuguaacuuugaugucgcaggcugucacaauaugauacacaauuucuuguauucguauuuguauguguuuucguguuucuuucuuucuuuguuCguguguuaaggugguaaguugccaugcagcauuugugcggcucaacaauuuuaguuucau**

**>Tb927.5.3430 -50.23**

**aauuuggaaugguuaggacggaaacagcauaugguuauaauuuaucacagguaaucugagagcauuuuuuuacucuuggagggacuaucauuuuauuucuuugugauuagugugugacgaccauuuuuuuuugucuauuauguauuuuaucagugugcccaucuucuuuuucuuuuuacaugugguaguguugcuaucgcgauaggAUGCACGUUAAUGUCGGACAUAUUGUCUUUC**

**>Tb927.7.1810alt -63.14**

**GcguuugacuuucaauuccucaauguuuuugguugucgcuguucuguuuuuaacauuuugcaugacuaaugucuuuuguucauguuuguucguuucccucuacgucugcuuuugauguuccguuauuuuacuuuuacguuugcuuuuuuuucuuuacuguuugcuccaccccguacuccuuacgauugguaacauccugauucaaaugucggcugcAggugauaggggagcgagcuuaugaagacguggaaguacugcuucuccguca**

**>Tb927.7.1820 -52.98**

**UuauguauuuuuuuuacucuuugguuacacacucguuacuuaucuuuuccuuauauccuuccuaacauuauggugcucccaugguuuuccucuucuuuccugugcggugggcccaguugcugcgucuauccacugcauugcugaccacuauccacucucccgugcacuuauuauguuguuuucucuuuuuuacuuuacugAgcgcaaccgaauugugggggacauaguagaaggcaagaccacuugaccgccc**

**>Tb927.7.2980alt -49.41**

**Cguuuuuaccguacuugaucacacacauguauuccuccauggacugaucuuauuuacacucuugguguuauucacccuccuuuaagcaccaauuucuuugcaauacaugcauauacauguugguuuuggggcaccuuuauauuguuauccaacugcuuuuuuuguucgccacgcuuuuccacuucuuaccuuuuacacacuagguuaauuugggcaccgcgugagguuaauaugaccaaauguauguuucuca**

**>Tb927.7.2985 -42.28**

**GggaugagagucgauaugaauauaauaaaugaugcuuguaaggaugauuugaccaacuaccgcuuucguacacguguguauuuuugcaugcuuguguuuuaucugcuuuguuuauuguaacccauuuaaaucauauuuuuuuguucacuucuguugucuuuuugucacuguugaauuguucccauugaguuagcugaauuucauugguuuuuggaguuaucacAUGAUGUACGUGCUUGUAGC**

**>Tb927.8.1580alt - -60.76**

**UuucgugcgucaaguccacuugccagccuuucauaucguaccuuuuguuuuacccuacacuuggcgguguggcgaccuaaaugggccaacuuuuugugggcucgcuuuuguuguugugagugaaaaaggugcuuacgauuuuucuuuuuuuuuuguuuuacucuccaaccauuuguucuuuccuccucuuuuuuuuucuauuuucugcacauuuuuguggggucgguAguguucuuucguuuuguuuuugguucuuccuucuuuuaacaccggcugggg**

**>Tb927.8.1590 -63.73 kcal/mol**

**ugucuuuccuuacaccacucgaauguggugggcgcgguguaaacuugacuguaaaguuucaacucuuccuucaucucuuguuuucugcauuuuuccauuuccauauggacacguuuaucuguaugcauauauguuuacuuauuuguguacaucuuccuuccuuccuuccuucccucuuuucuuuuuuuuucccccauuccuguuugcuguggcagaguagcagugugggugcgugaagguuugugcgcauugugcagcagcagcgua**

**>Tb927.9.4230alt -35.46**

**GugugugugugugcgugcguguguuuauuuauuuuaucauuuaucuuuggauuucuuugccuucuggcuuuuugugguuaacauguaaguuuacugcucuaauaucuuacauuuuaaguauacuuuccuagucuguuuuuuuuuuguccuggcAgcauucuuauucggugcccuuaugguuguuaaaguuugggaagaggaauagg**

**>Tb927.9.4250 -64.15**

**Uuguucugugacgauuuuugccacuguuuguaauuaauuucauuaacgugagaucgucugccuucuuuguguuuucacuugcaugcggcaguguccgugcuuaugauuuugaggcgcgcaagguugugcauuuaaugucauuccuuuuuuuuuuuaaacgucgccaccuuuccccguccuguaacguguugucuuucugcagggugauuaguuauagcugagcagacgacccuguuucucagcugucaagcag**

**>Tb927.9.8370alt -69.40**

**UUGGGGCUGCUGAUGGCGUCGGAUUACCUGGAUUGUUGAucauauuuauuuacucacgcgcugaaugaaguaaggagaugaugggguuguugcacacagcauccgucucuauagcgugcccauacaugcgugcaugcuaacgacgaugcccucuacucauuuggcuucuuuuuuuuucuuuuuuuuuuuugcgcuucgcccuguucaucacAgcccuuggcuuuugcgagagaaguaacgggagagcaaucaaacugcguacca**

**>Tb927.9.8350 -72.50**

**UauuucguaacgggaccuuguuguuguccucucuccguauauaugcaugugaaacucuccguauauaugcaugugaaacacuucauuucauucauucagaccgcauuguucaugaccguaucaauaauugaacaaugccuuuugccuauaucaacaaacguucugcacgacugcgcuuauuaucgcuguuuuuuuuccgugugcaauugauuuuugucuguuugcaAgcgugguuuggugggagcagacaacaaaauuagagguugcaucuccguugc**

**Tb927.10.1500alt -43.77**

**GcuauucgcuguucaaccuauuuuuuucuccccacgucucagugaaacuuuaaaaauuuuccugggggaaaccccguaugcuuuucuuuuuguguguguuuuugauugaucgccucgguuccguuuggcuucgaguucuccuaaaaucaucacuuuuccuucuuuuaugauucacaauuguguuguuguAguuuuguaguuuucgcccuuuuuuuucgaaaaugacucagagcuguccguga**

**>Tb927.10.1490 -69.22**

**GuuaaucugaaggggaaucaucuuuagcguuucugugggggcuuucccguuacuuccauuucuuuaucccguuacuuccauuucuuuauuuuuuccuucuuuuauuuucuacgccugugucugggcaccccaguucccggggaggccuggaucaagcuugucuguguaucacagguccugcauuuucuuuucccuuaccucccuuaauaaucucccuucucucuccugcauuuccuccuguguuguuaacuuuuguauauaaAgcaauaguaaagggggaaaguguguuaacguugcaccuuuccuugaaagca**

**>Tb927.11.2500alt -44.82**

**CccuuuccauucuguaugaaugguuggucaucuugaucuaucuuuuuuuuuacguuuuuuuuuccagcguuccuuguuguucuuuuuucuuuuuucucuuuccuacgcugucauuuauauuacggaguucuguuaucgccacauuuuccccuuuuguguuuuuuuccuauauuauuuuauAgggaaagggaaacauauauauauauauuuauuuuaaagguuauaauugacca**

**>Tb927.11.2490 -60.08**

**UcuauuuaaauauuaaugugguuacuuuaaugaauaauauaccucuaucugauguucgcgaugcacggaguuguguguuuuacuccucuucagaacuauaaauguuauugaauguaccgaauuuuucucauccuuugcuuucugaugcuuuccuuuccuuuuauccuuacccuuccuccacuuuccacgcacauauaacgucaacaaugcucguauucguauguuucacucauacauucgcauacgcagAgcauuagcagaaguagcuuauuacuaacgcgucugcuggaaaggagggacc**

**>Tb927.11.5450alt -61.17**

**CgaccuccgugcuuuauuauguuuccguuguugugauaguuuuuuuuguuauuuauuugaaugugagccaauguaagacacgcggugaucuuucacauggugacuguuuguuucuucucacuucauuuuuauccgacauuucuuucgauaauuugcgucgauugauccgucuguuugcuuccaaacacaaaacuaaugguuAguaacaauaauagcaauagugacagacacaaagaggggagggagcguuuuca**

**>Tb927.11.5460 -43.39**

**AauuguacugccguaauuuuaguuggauucaguuuagcuaucaaaugugucaaaugcuucgcugucuucacugcucccuugcaugcacuaaaaaaaauuuugugaccugcuauacaaccaccuguuugagucuccgcacaaccacauaucaagaauuuguucuguuaccugucguaguuuuuaggggugauuuguuccaggggaaaguuaaAUGACAAAUUCCCCAG**

**Tb927.11.13940alt -21.60**

**ucgaaugccauguucaacuugcuuuuuuuucuucucuccuugccuauuucacacuuucauuguuuuuguucucgucuguuuguuugacuguuucugauugcuuuugaugcgucguugucgccaaucagcacuauuucucuaugccuuuuuucuuucuuucuuucucuuucucuuucucuuucuuauauuccguuucuuuucuguuugcuuguuguuuuuuccucaaguuauuguugcuguuccaguucuucaccuaacuucccuucuucacucuuguu**

**>Tb927.11.13945 -49.45**

**UucaccacagauuccagucuaaacucuuucaccuguggcuggaugcuuuccaauuuauacgguugugcuuugcuuugcuuuuuuucuuuauuugaguggcgucucgaugcuuaucuuuuuuuuuuaucugauaugcaacccauucucuuuuucuauccucucuuugcgauaccauuccacuugacAgaguacaauacauuuuguggcaccaggguaauuaaauaccccaaggaaagg**
